# Supplementary material for: Study on the Gene Regulatory Effects in Leukemia Based on Multi-omics Mendelian Randomization, Network Pharmacology, and Functional Validation
Source: Research Square preprint supplement (doi:10.21203/rs.3.rs-7510513/v1), 2025-09-25
Supplement: Supplementary file 1 [file 261448e3b7164d810ebe77a5.xlsx]

## Sheet: Supplementary Table 6
Supplementary Table 6. Results of pleiotropic tests
Exposure-eQTL	Outcome	Egger_intercept	SE	Pval			Exposure-pQTL	Outcome	Egger_intercept	SE	Pval
A2MP1	Acute Lymphoblastic Leukemia	-0.0512927	0.0620734978641719	0.416438223601876			CRYBB2	Acute lymphocytic leukaemia	0.0297719479637276	0.279507274510118	0.92189640886947
AARS	Acute Lymphoblastic Leukemia	-0.0187531	0.0962276327603357	0.853156196558063			RAF1	Acute lymphocytic leukaemia	-0.155046	0.31804676876378	0.674107869190449
ABCA2	Acute Lymphoblastic Leukemia	0.0968973705776047	0.0668452698148546	0.163482756391734			ZNF41	Acute lymphocytic leukaemia	0.138420566576279	0.17980942127773	0.52190000450788
ABCB9	Acute Lymphoblastic Leukemia	0.0488646637175794	0.064024775408219	0.45382446558144			GUCA1A	Acute lymphocytic leukaemia	-0.0881772	0.0807287909146116	0.316621687608404
ABT1	Acute Lymphoblastic Leukemia	-0.0419578	0.0601489063525219	0.498741885333666			OCRL	Acute lymphocytic leukaemia	0.274911739925829	0.190053899789336	0.221579557086972
AC002511.1	Acute Lymphoblastic Leukemia	0.0314884473693462	0.189316109749283	0.895073273862791			SPDEF	Acute lymphocytic leukaemia	0.0682366832233261	0.132872277896338	0.634631053042866
AC004696.2	Acute Lymphoblastic Leukemia	0.0404466683699191	0.154215186355377	0.801882442905634			SNAI2	Acute lymphocytic leukaemia	0.106969798356434	0.184535900729433	0.620735359773522
AC005154.6	Acute Lymphoblastic Leukemia	-0.0630785	0.0473984543476869	0.195261771807213			KCNAB2	Acute lymphocytic leukaemia	0.0581065390898307	0.227437130975264	0.840760169312717
AC005488.1	Acute Lymphoblastic Leukemia	0.0169816370775565	0.0490993433206514	0.731576840635112			VDR	Acute lymphocytic leukaemia	0.118317266084778	0.162780356257264	0.519898885058468
AC005682.6	Acute Lymphoblastic Leukemia	0.063306082516473	0.100299143479994	0.538867225826299			HOGA1	Acute lymphocytic leukaemia	0.116348854585987	0.174569021956548	0.552771727798222
AC006129.4	Acute Lymphoblastic Leukemia	0.0351945112780024	0.0963834010644967	0.723432322658901			DUSP4	Acute lymphocytic leukaemia	0.827897919032607	0.347440644894446	0.140049916872003
AC009299.3	Acute Lymphoblastic Leukemia	0.0442733280734521	0.0616304373145258	0.477438327984199			ZHX3	Acute lymphocytic leukaemia	-0.0953457	0.143136053136411	0.573884919521283
AC009404.2	Acute Lymphoblastic Leukemia	-0.022042	0.158330768340099	0.894714021991633			SIGLEC12	Acute lymphocytic leukaemia	-0.0631544	0.0765887713666255	0.428834244752886
AC009506.1	Acute Lymphoblastic Leukemia	-0.0857127	0.042247672489108	0.0490049243042591			HNF4A	Acute lymphocytic leukaemia	-0.0803007	0.143332002288432	0.60520565109724
AC011816.1	Acute Lymphoblastic Leukemia	0.0383409023103619	0.0768948701062426	0.623774123733419			WNT10A	Acute lymphocytic leukaemia	-3.88945e-05	0.118563358807298	0.9997539635403
AC012309.5	Acute Lymphoblastic Leukemia	-0.137393	0.120046501912016	0.268277747360333			BIRC2	Acute lymphocytic leukaemia	0.139020604898842	0.111353066168634	0.258366321268864
AC012314.20	Acute Lymphoblastic Leukemia	0.444597644559532	0.281261503300145	0.359091963270729			NCF2	Acute lymphocytic leukaemia	-0.349925	0.187572494796871	0.0990831803609293
AC016773.1	Acute Lymphoblastic Leukemia	-0.00664808	0.0693156641677484	0.924229752880579			CBFB	Acute lymphocytic leukaemia	-0.476744	0.624199428977549	0.524806383180621
AC018638.1	Acute Lymphoblastic Leukemia	-0.00690119	0.151963099672078	0.965535626765433			ILK	Acute lymphocytic leukaemia	0.0502729999986346	0.120910644785976	0.749145820615521
AC018755.15	Acute Lymphoblastic Leukemia	-0.16404	0.264310352097051	0.598140173736173			FOXM1	Acute lymphocytic leukaemia	0.219657526394357	0.217697476169022	0.419199832027843
AC018755.16	Acute Lymphoblastic Leukemia	0.0613148470191889	0.0480611017469563	0.212161753479909			FANCL	Acute lymphocytic leukaemia	0.353607449467725	0.275991673836532	0.421912718488918
AC018804.6	Acute Lymphoblastic Leukemia	0.0142753370115734	0.0751220796381807	0.855552844831544			RBBP9	Acute lymphocytic leukaemia	-0.0946099	0.327117162060568	0.791245946826021
AC068831.10	Acute Lymphoblastic Leukemia	-0.157563	0.16401422927603	0.407588860660493			ACBD6	Acute lymphocytic leukaemia	0.379218210447349	0.216651016692863	0.330441598080887
AC079325.6	Acute Lymphoblastic Leukemia	0.060273981274089	0.0554641509624136	0.287133332266426			BAG3	Acute lymphocytic leukaemia	-2.08282	34.5489830632374	0.961667163789945
AC079776.7	Acute Lymphoblastic Leukemia	-0.0717381	0.172699068423809	0.699169216214137			SATB2	Acute lymphocytic leukaemia	0.18820406973823	0.130683170843454	0.223246225375202
AC083949.1	Acute Lymphoblastic Leukemia	0.0363508509081026	0.0768121543297563	0.645291736907798			NEFL	Acute lymphocytic leukaemia	0.120084812572968	0.0815152891607835	0.178930472476119
AC087793.1	Acute Lymphoblastic Leukemia	0.14719553138388	0.0979836798609747	0.161185519767839			STAR	Acute lymphocytic leukaemia	0.177751424564689	0.36886576835203	0.677465061113435
AC093609.1	Acute Lymphoblastic Leukemia	0.0728020108837237	0.215133965887212	0.757358759190012			APRT	Acute lymphocytic leukaemia	0.266380890281876	0.259414554568073	0.362526075077678
AC108488.3	Acute Lymphoblastic Leukemia	-0.0716564	0.057908405481967	0.234956670916731			ENO2	Acute lymphocytic leukaemia	-0.15604	0.127325596761751	0.274951880548721
AC127904.2	Acute Lymphoblastic Leukemia	0.0147070648002208	0.0832493882424898	0.862719858331243			IL10RA	Acute lymphocytic leukaemia	-0.217414	0.117372942243733	0.106401223767111
AC131056.3	Acute Lymphoblastic Leukemia	0.168401752437799	0.113996426492807	0.167656505735553			STAT3	Acute lymphocytic leukaemia	0.0431945289324311	0.0959301019975652	0.671366606155706
AC131971.1	Acute Lymphoblastic Leukemia	-0.0136545	0.11076428853752	0.907835371568023			JUN	Acute lymphocytic leukaemia	-0.0164953	0.209290930460634	0.942142519657084
AC144831.1	Acute Lymphoblastic Leukemia	-0.0285484	0.107135845614727	0.803050390551791			SMAD3	Acute lymphocytic leukaemia	-0.0974536	0.367202722734279	0.815557351226314
ACACB	Acute Lymphoblastic Leukemia	0.043705878445202	0.0374426007797688	0.249385643891627			SMAD2	Acute lymphocytic leukaemia	0.0183867042685239	0.44046476214735	0.973440446224823
ACAD8	Acute Lymphoblastic Leukemia	0.124335759804005	0.0701764329445177	0.0902867261048343			PDGFRA	Acute lymphocytic leukaemia	0.153167072624551	0.0702026201575171	0.0497345172950861
ACBD4	Acute Lymphoblastic Leukemia	-0.251432	0.176833263689245	0.228128001422518			STAT1	Acute lymphocytic leukaemia	0.202661847488905	0.246212209399796	0.496967890051893
ACD	Acute Lymphoblastic Leukemia	0.0721322248426736	0.151231502703762	0.665977224019856			STAT6	Acute lymphocytic leukaemia	0.0188388128197616	0.123617134198343	0.882647683857242
ACER1	Acute Lymphoblastic Leukemia	-0.0148997	0.440539109544023	0.978476732538244			ZNRF3	Acute lymphocytic leukaemia	0.20501470131024	0.222849989073056	0.409649351587576
ACOT7	Acute Lymphoblastic Leukemia	-0.14986	0.101902015073964	0.201352504240586			ANGPTL3	Acute lymphocytic leukaemia	-0.0510997	0.0664676292945612	0.458206589111575
ACP6	Acute Lymphoblastic Leukemia	-0.0670903	0.0525148420755507	0.211541252664499			STX12	Acute lymphocytic leukaemia	-0.146158	0.346720022335157	0.746026397599362
ACSF2	Acute Lymphoblastic Leukemia	0.0435742263581169	0.0811005989261484	0.601769234172788			SCARA5	Acute lymphocytic leukaemia	0.00852775949454245	0.0933553892890739	0.929020599750931
ACSM1	Acute Lymphoblastic Leukemia	0.0541174227186609	0.0746150049672651	0.484901276459538			NPDC1	Acute lymphocytic leukaemia	0.134437008130129	0.496329267343618	0.831604140829425
ACSS1	Acute Lymphoblastic Leukemia	0.00397188133059279	0.063740223597519	0.950875795118844			GOSR2	Acute lymphocytic leukaemia	0.158919891389058	0.194633353834676	0.474015261277956
ACTBP8	Acute Lymphoblastic Leukemia	-0.00678851	0.0384054262538403	0.860358865881018			SLC3A2	Acute lymphocytic leukaemia	0.0827450289104619	0.162645587493119	0.700394882220732
ACTR1B	Acute Lymphoblastic Leukemia	0.060660475995319	0.0584153428104658	0.314507518912106			AGA	Acute lymphocytic leukaemia	0.166431156224848	0.147133277288399	0.340240356448259
ACTR5	Acute Lymphoblastic Leukemia	0.00444438495394754	0.0524442847461994	0.932866884232919			CSF2RA	Acute lymphocytic leukaemia	-0.245922	0.214694250013973	0.335115311116718
ACVR1B	Acute Lymphoblastic Leukemia	0.0162046615273565	0.108274422851243	0.88688024168382			CLMP	Acute lymphocytic leukaemia	0.100501439975226	0.082214363748595	0.288647711879457
ACYP2	Acute Lymphoblastic Leukemia	0.106349157953111	0.0453908886483946	0.0232353334329412			TMEM190	Acute lymphocytic leukaemia	-0.0295569	0.106974290159741	0.788558316204098
ADAM15	Acute Lymphoblastic Leukemia	0.025744117230335	0.0429849768898903	0.55269632059823			APOM	Acute lymphocytic leukaemia	0.105789491562523	0.0849260029649932	0.24433858296748
ADAM19	Acute Lymphoblastic Leukemia	-0.00407956	0.0518713152464544	0.937914992360802			PABPC3	Acute lymphocytic leukaemia	0.00437158968525799	0.239941805591793	0.988402468901121
ADAM28	Acute Lymphoblastic Leukemia	0.0344440146157926	0.0811667608608698	0.677751266290874			SHISA2	Acute lymphocytic leukaemia	0.0521206290750748	0.137216294237544	0.719661222658414
ADAMTS13	Acute Lymphoblastic Leukemia	-0.0787112	0.0826643810177755	0.384733537426188			NUCB1	Acute lymphocytic leukaemia	-0.140616	0.116710077803459	0.294676047782012
ADAMTSL4	Acute Lymphoblastic Leukemia	-0.0830564	0.0508590424562013	0.14647228278413			CEACAM20	Acute lymphocytic leukaemia	0.25192151438993	0.185968726512225	0.404830916407565
ADAR	Acute Lymphoblastic Leukemia	0.0992904771855546	0.214694370542126	0.660038061372492			IL31	Acute lymphocytic leukaemia	-0.114997	0.103556106641036	0.347792936078372
ADARB2	Acute Lymphoblastic Leukemia	-0.00255789	0.0377690508307249	0.946226365600039			ANTXR1	Acute lymphocytic leukaemia	0.0306742656913591	0.117303922214912	0.804141509445376
ADIPOR1	Acute Lymphoblastic Leukemia	-0.101317	0.219318372303451	0.675547900918253			TMEM106A	Acute lymphocytic leukaemia	0.0806866615458866	0.103411534476875	0.464902684286529
ADK	Acute Lymphoblastic Leukemia	0.0276615777189974	0.0379078098469214	0.468456856427185			PGRMC2	Acute lymphocytic leukaemia	-0.108775	0.191379571648013	0.670969730263991
ADO	Acute Lymphoblastic Leukemia	0.0185520870320257	0.0937833519360073	0.84624672754876			ACRV1	Acute lymphocytic leukaemia	0.199694511076404	0.148292279992343	0.249342261033734
ADRB1	Acute Lymphoblastic Leukemia	0.000671612712259286	0.0585132163159544	0.991047636031179			COL6A3	Acute lymphocytic leukaemia	0.018263153698125	0.413833328094944	0.971923127716586
ADSS	Acute Lymphoblastic Leukemia	-0.0361002	0.0345921086128041	0.303266649835784			CSF2RB	Acute lymphocytic leukaemia	0.0670486239361941	0.0663186722967907	0.351032554819415
ADTRP	Acute Lymphoblastic Leukemia	0.0235688065032156	0.070993850154783	0.745193132063761			PTGDS	Acute lymphocytic leukaemia	0.0986182700316044	0.150311539610678	0.579156081488863
AEN	Acute Lymphoblastic Leukemia	0.0811473416823202	0.067425742125265	0.254041461827525			MXRA8	Acute lymphocytic leukaemia	0.0973570306280031	0.143922542970826	0.515758457363934
AFF4	Acute Lymphoblastic Leukemia	0.107237425280738	0.12480883114387	0.429481972213251			DHX9	Acute lymphocytic leukaemia	-0.109778	0.157067263539577	0.534911996475097
AGAP1	Acute Lymphoblastic Leukemia	-0.0636054	0.0588150970973393	0.290245453474984			PSMB6	Acute lymphocytic leukaemia	0.230668345513409	0.161378942596392	0.388635528582534
AGXT2L2	Acute Lymphoblastic Leukemia	-0.163955	0.235410349429395	0.536248946219127			CD99L2	Acute lymphocytic leukaemia	-0.0431019	0.254325401599374	0.881014231642597
AHI1	Acute Lymphoblastic Leukemia	-0.00811825	0.0436036779195149	0.853025922900535			TSPEAR	Acute lymphocytic leukaemia	0.237525350026713	0.17036375766156	0.297943797152448
AIMP2	Acute Lymphoblastic Leukemia	-0.0134751	0.0845156582280843	0.874922099156699			BMPR1B	Acute lymphocytic leukaemia	0.17316493912654	0.32127859662556	0.643866871116529
AK3	Acute Lymphoblastic Leukemia	0.0716264080300413	0.044132238546602	0.117134759334731			LAT	Acute lymphocytic leukaemia	0.131024880320734	0.285165750122919	0.691005291293006
AK5	Acute Lymphoblastic Leukemia	-0.0855623	0.0462870082456519	0.0751145322124512			KLRC4	Acute lymphocytic leukaemia	0.636816240918174	0.655908896612729	0.509401749917474
AKAP12	Acute Lymphoblastic Leukemia	-0.0292784	0.130007030168513	0.842736652835112			TEX29	Acute lymphocytic leukaemia	0.196073782402141	0.132502542728644	0.189425580559105
AKAP6	Acute Lymphoblastic Leukemia	0.222389803399034	0.132311521848876	0.168096145874073			PCDH9	Acute lymphocytic leukaemia	0.0723683373320435	0.0631850315332158	0.267937034462786
AKD1	Acute Lymphoblastic Leukemia	-0.0173151	0.0650266452820003	0.793228049979865			ITM2C	Acute lymphocytic leukaemia	-0.468476	0.412385867624309	0.459516975160329
AKIP1	Acute Lymphoblastic Leukemia	-0.0807488	0.038041542233776	0.037990163702454			PGLYRP3	Acute lymphocytic leukaemia	-0.0899577	0.132208402688877	0.533582150434473
AKIRIN2	Acute Lymphoblastic Leukemia	0.133136562293576	0.0884145549817513	0.229191078212482			SLITRK3	Acute lymphocytic leukaemia	-0.0533092	0.0719704558989504	0.46670247499605
AKR1E2	Acute Lymphoblastic Leukemia	0.0998815526624546	0.0735000152245852	0.197278635663133			SCGB1A1	Acute lymphocytic leukaemia	0.028733253606095	0.078733214734239	0.725929486895114
AKT1	Acute Lymphoblastic Leukemia	-0.0766656	0.0711477368169228	0.300822344093623			MGAT1	Acute lymphocytic leukaemia	-0.698244	0.654798275726367	0.397946228735087
AKTIP	Acute Lymphoblastic Leukemia	-0.0596699	0.0526470128112371	0.266659757606845			CST8	Acute lymphocytic leukaemia	0.0281254417215893	0.106145269124867	0.797000412216839
AL161915.1	Acute Lymphoblastic Leukemia	0.00431997735482744	0.0691536485128719	0.951554499588735			AXL	Acute lymphocytic leukaemia	-0.0330268	0.109002819782241	0.774098448636264
AL513477.1	Acute Lymphoblastic Leukemia	0.105904378118529	0.11910919584394	0.408160265496135			PUF60	Acute lymphocytic leukaemia	0.0248937304891078	0.222176810462018	0.921019935631259
ALDH1A1	Acute Lymphoblastic Leukemia	-0.0556758	0.0408579618377425	0.181945550259616			SFTA2	Acute lymphocytic leukaemia	1.17532519832861	0.476492666212773	0.132472526076883
ALG1L	Acute Lymphoblastic Leukemia	-0.0373325	0.0666460598507816	0.581915427219019			POMK	Acute lymphocytic leukaemia	0.0287071862472758	0.157221364796835	0.863999762692221
ALG1L10P	Acute Lymphoblastic Leukemia	-0.137059	0.135306477987906	0.368377461434318			NDUFS4	Acute lymphocytic leukaemia	0.0176852204987117	0.0652869568965063	0.789255896239458
ALG1L6P	Acute Lymphoblastic Leukemia	-0.0716867	0.100542611379431	0.507731135031734			CLGN	Acute lymphocytic leukaemia	0.0548128260628419	0.0760150699915553	0.487376700275658
ALG8	Acute Lymphoblastic Leukemia	-0.148366	0.138025789993669	0.342930466437662			HTN3	Acute lymphocytic leukaemia	0.0473482905377371	0.0608527745762496	0.44947272235172
ALKBH8	Acute Lymphoblastic Leukemia	-0.00236469	0.107822639371434	0.982981303243505			APMAP	Acute lymphocytic leukaemia	0.011866716940886	0.197972268242703	0.957653114405901
AMACR	Acute Lymphoblastic Leukemia	0.0694212067721556	0.0635799860549524	0.29012254991892			TOR1AIP1	Acute lymphocytic leukaemia	0.129966132227113	0.195149665344154	0.625967842277055
AMIGO2	Acute Lymphoblastic Leukemia	-0.0287332	0.08599873872661	0.743623586436543			HTN1	Acute lymphocytic leukaemia	-0.264428	0.161006767456489	0.242225651688396
ANGPTL6	Acute Lymphoblastic Leukemia	-0.0194873	0.105825089795677	0.85911979904586			PLOD3	Acute lymphocytic leukaemia	-0.0181918	0.0857750209287174	0.836764123530789
ANK1	Acute Lymphoblastic Leukemia	-0.0914506	0.111887966402575	0.43483628687122			MPZ	Acute lymphocytic leukaemia	-0.0197627	0.0696303115874219	0.779784453424652
ANKMY2	Acute Lymphoblastic Leukemia	-0.0929434	0.0929040844144894	0.346400996114418			MSMB	Acute lymphocytic leukaemia	-0.0492186	0.0572090622930792	0.40092268638246
ANKRA2	Acute Lymphoblastic Leukemia	-0.00200736	0.0588251906572592	0.973085801090255			PRR16	Acute lymphocytic leukaemia	0.0483399043008958	0.174823032592177	0.808112925962149
ANKRD10-IT1	Acute Lymphoblastic Leukemia	-0.068997	0.156298333310676	0.68877107839153			APLP2	Acute lymphocytic leukaemia	-0.00392286	0.14304711307575	0.979182783750605
ANKRD10	Acute Lymphoblastic Leukemia	0.0522646713957716	0.0545977223900621	0.345608646609483			HTATIP2	Acute lymphocytic leukaemia	-0.0383925	0.0796835794023659	0.64463803946854
ANKRD18A	Acute Lymphoblastic Leukemia	-0.28482	0.264236581365528	0.360029365191862			OLFM3	Acute lymphocytic leukaemia	-0.155778	0.205245313283596	0.490127278730474
ANKRD26	Acute Lymphoblastic Leukemia	0.0271431217909004	0.061468235496185	0.66509265234951			ASCC1	Acute lymphocytic leukaemia	0.0992976039364768	0.147648387716782	0.54941348956661
ANKRD34B	Acute Lymphoblastic Leukemia	0.0397499138251338	0.0373940679682752	0.291487919235592			GNPTG	Acute lymphocytic leukaemia	-0.0674215	0.0564670383923742	0.260032800453662
ANKRD36	Acute Lymphoblastic Leukemia	0.0608349559020062	0.0560831979508177	0.295169625561032			SFTPB	Acute lymphocytic leukaemia	-0.107884	0.111488801073858	0.370582124798075
ANKRD9	Acute Lymphoblastic Leukemia	0.000490708787991805	0.0722123166899215	0.994652875271802			TMX2	Acute lymphocytic leukaemia	0.023626964128194	0.204203622574932	0.91346395174162
ANKZF1	Acute Lymphoblastic Leukemia	-0.577595	0.405431829150893	0.290300459817088			NDUFB4	Acute lymphocytic leukaemia	-0.056507	0.0892420047553841	0.538490918801449
ANO9	Acute Lymphoblastic Leukemia	-0.0581287	0.0541625533659464	0.294301244417934			KLRG2	Acute lymphocytic leukaemia	0.150447912898129	0.108218722306845	0.258651763897499
ANXA3	Acute Lymphoblastic Leukemia	-0.0293732	0.0617245609286808	0.640595862353559			IGSF11	Acute lymphocytic leukaemia	-0.60933	0.516297762180369	0.447503222134707
ANXA5	Acute Lymphoblastic Leukemia	0.0974623769179562	0.0321614299598882	0.00360077165955785			COL28A1	Acute lymphocytic leukaemia	0.183378560542471	0.202755857383742	0.432436032132573
ANXA9	Acute Lymphoblastic Leukemia	-0.104751	0.154751326532196	0.621178285133291			SUDS3	Acute lymphocytic leukaemia	-0.089332	0.189375180438338	0.68358188753976
AP001007.1	Acute Lymphoblastic Leukemia	0.0410645313380847	0.0440376579676696	0.356414848360629			GNRH2	Acute lymphocytic leukaemia	0.0212107879164524	0.0954718040112454	0.844806800365183
AP001189.4	Acute Lymphoblastic Leukemia	0.0491592986138051	0.0496292589053695	0.328713688237708			ACE	Acute lymphocytic leukaemia	0.0670047117474781	0.0938635743376795	0.485602555158057
AP001469.9	Acute Lymphoblastic Leukemia	-0.017459	0.0670895246345059	0.797482119946434			PSMD5	Acute lymphocytic leukaemia	0.0448365799408888	0.151993761733196	0.79580574142889
AP001610.5	Acute Lymphoblastic Leukemia	-0.0199935	0.0765304541221103	0.799780317813813			HS3ST5	Acute lymphocytic leukaemia	0.0290899663479928	0.0626262230080663	0.661812764757998
AP001625.6	Acute Lymphoblastic Leukemia	0.0725181667926671	0.0876956609437721	0.445932148590383			GAL3ST2	Acute lymphocytic leukaemia	-0.166382	0.167144545315414	0.352679759713789
AP001816.1	Acute Lymphoblastic Leukemia	0.0306683140154414	0.0326968313105501	0.35158467321916			PCDHB2	Acute lymphocytic leukaemia	0.0781978019470358	0.138311439640734	0.592315585286161
AP002954.4	Acute Lymphoblastic Leukemia	0.0555237702516999	0.0497430326339408	0.270676899062644			CDYL2	Acute lymphocytic leukaemia	0.0614420978156844	0.0893578831894652	0.541098209513238
AP1S3	Acute Lymphoblastic Leukemia	0.0212867707446788	0.0966674778396349	0.833011952675521			ADAM7	Acute lymphocytic leukaemia	-0.199875	0.14301942681097	0.395393064570134
AP5S1	Acute Lymphoblastic Leukemia	0.407773139016715	0.583077246769032	0.611478998108799			PROK2	Acute lymphocytic leukaemia	0.00657269078358584	0.0449752083919792	0.886236894007649
APBB1IP	Acute Lymphoblastic Leukemia	0.061426560892784	0.0474783672894406	0.208583600487279			KERA	Acute lymphocytic leukaemia	0.112182620410217	0.105051051086148	0.345735233951585
APCDD1	Acute Lymphoblastic Leukemia	-0.0512363	0.0596429394581188	0.400492122865188			GRIA4	Acute lymphocytic leukaemia	0.00394431757989644	0.249217662570494	0.987885721554377
ARF3	Acute Lymphoblastic Leukemia	-0.0523429	0.0434342209823242	0.238248706000144			TMED2	Acute lymphocytic leukaemia	-0.250361	0.37139799325655	0.622399406402112
ARFGAP3	Acute Lymphoblastic Leukemia	-0.0204794	0.0878339113555361	0.81926808520147			KLRG2	Acute lymphocytic leukaemia	0.151245653493546	0.108827759815993	0.299083782448542
ARHGAP11A	Acute Lymphoblastic Leukemia	0.0741518386371409	0.0705047517011088	0.327870142364844			CSGALNACT2	Acute lymphocytic leukaemia	0.128791352127147	0.147954643962364	0.43316190375966
ARHGAP15	Acute Lymphoblastic Leukemia	-0.0581132	0.0469884688285642	0.221843086297723			CLEC4G	Acute lymphocytic leukaemia	0.162395844185513	0.267049977596528	0.586062182777263
ARHGAP18	Acute Lymphoblastic Leukemia	0.228126185397332	0.221140892314196	0.378146059739761			SERPINH1	Acute lymphocytic leukaemia	-0.150971	0.120970496886318	0.267288798436494
ARHGEF17	Acute Lymphoblastic Leukemia	0.0353408071826327	0.0466768272417416	0.457794963717134			KLRB1	Acute lymphocytic leukaemia	-0.000925864	0.0760722735818903	0.990628918238014
ARHGEF35	Acute Lymphoblastic Leukemia	-0.0124671	0.0630211292419549	0.846494216672469			CD1A	Acute lymphocytic leukaemia	0.0911068119041189	0.140550746283248	0.545434237982737
ARHGEF40	Acute Lymphoblastic Leukemia	-0.118931	0.0952312306612844	0.279811681112872			HABP4	Acute lymphocytic leukaemia	-0.0368979	0.103927163651135	0.746055851969703
ARHGEF5	Acute Lymphoblastic Leukemia	-0.0926756	0.194327318544883	0.716703389434636			PILRA	Acute lymphocytic leukaemia	0.0356237387548974	0.0728086736767958	0.629086299272377
ARID5A	Acute Lymphoblastic Leukemia	0.110027545164335	0.0767566902169276	0.172241706526372			TOMM20L	Acute lymphocytic leukaemia	-0.0752586	0.152469690304819	0.639136049787267
ARL6IP5	Acute Lymphoblastic Leukemia	-0.102641	0.0949386114558998	0.321168497208917			SMPD1	Acute lymphocytic leukaemia	0.0349188409483706	0.0541404158854145	0.524017868560237
ARMC2	Acute Lymphoblastic Leukemia	-0.0122381	0.112753768299543	0.916614238670953			B4GALT6	Acute lymphocytic leukaemia	-0.0357002	0.0443131740308318	0.431579343686902
ARMC5	Acute Lymphoblastic Leukemia	0.0801546382439572	0.116231056696849	0.512641725436282			HHIP	Acute lymphocytic leukaemia	-0.0730797	0.0937748217788493	0.471054553324614
ARPC5	Acute Lymphoblastic Leukemia	-0.0176537	0.038308693519396	0.646880670066408			A4GNT	Acute lymphocytic leukaemia	0.336678926439171	0.163132990454746	0.175087592490836
ARPP19	Acute Lymphoblastic Leukemia	-0.127909	0.0661937593114653	0.0794704901477269			GCNT4	Acute lymphocytic leukaemia	0.320986535260822	0.390054460850464	0.497055137981585
ARRB1	Acute Lymphoblastic Leukemia	0.0551175082701879	0.0573305811302473	0.355324800204072			SIGLEC15	Acute lymphocytic leukaemia	0.100771827894511	0.11114433299121	0.431418218616158
ARSB	Acute Lymphoblastic Leukemia	-0.0377185	0.0423927891568477	0.378444761591193			BTNL3	Acute lymphocytic leukaemia	1.30845884884905	0.529971296227849	0.2449961963004
ASB6	Acute Lymphoblastic Leukemia	0.0722278696858242	0.321101633683265	0.859144588180152			EBI3	Acute lymphocytic leukaemia	-0.00826504	0.0468835824363366	0.862035501055878
ASL	Acute Lymphoblastic Leukemia	0.154094027377536	0.0864206840435967	0.0962623858791524			HNRNPDL	Acute lymphocytic leukaemia	0.168704826216489	0.19810544935775	0.4841406427477
ASPDH	Acute Lymphoblastic Leukemia	0.0551448902014851	0.10214893094984	0.601115851026509			FAM163B	Acute lymphocytic leukaemia	-0.0356509	0.107441290653179	0.756685308635904
ASUN	Acute Lymphoblastic Leukemia	-0.354185	0.276386446897237	0.421850576386666			DSC1	Acute lymphocytic leukaemia	0.169698904294039	0.116721032699042	0.205721751900805
ATF3	Acute Lymphoblastic Leukemia	0.194992499723496	0.193968818014595	0.388825719640314			C6orf89	Acute lymphocytic leukaemia	0.0245360089112425	0.0806873432335567	0.776223890272659
ATF5	Acute Lymphoblastic Leukemia	-0.0403703	0.0867221562612293	0.652623406324551			MRAP2	Acute lymphocytic leukaemia	0.341314870598573	0.245552602830973	0.299028402058369
ATG10	Acute Lymphoblastic Leukemia	0.0845191288845048	0.0423930533162913	0.0538031834372381			OSMR	Acute lymphocytic leukaemia	0.151371280543918	0.168894406025641	0.436164080529208
ATG16L1	Acute Lymphoblastic Leukemia	0.0759501922176093	0.0892893040558874	0.419715923748748			STMN2	Acute lymphocytic leukaemia	-0.0627732	0.357641697835728	0.876833820951796
ATG9A	Acute Lymphoblastic Leukemia	0.0907544990211115	0.128317633993706	0.510994158356035			ASPRV1	Acute lymphocytic leukaemia	-0.102835	0.0806238291170152	0.230967448531615
ATOX1	Acute Lymphoblastic Leukemia	0.0584094538209535	0.0647107018694314	0.375695696715266			STX8	Acute lymphocytic leukaemia	-0.340929	0.228832606442646	0.274720131539801
ATP5G1	Acute Lymphoblastic Leukemia	0.085530920266941	0.0482201560319504	0.0899471060889838			NTM	Acute lymphocytic leukaemia	-0.0137783	0.0697914171214688	0.847453463868556
ATP6AP1L	Acute Lymphoblastic Leukemia	0.0192295157160967	0.0485530331113252	0.693718958475471			GALNT13	Acute lymphocytic leukaemia	-0.0034215	0.243390931495752	0.990060249741059
ATP6V0A1	Acute Lymphoblastic Leukemia	-0.206139	0.183115090093769	0.46238807394027			PLA2R1	Acute lymphocytic leukaemia	0.0430770698558197	0.040072974406265	0.294038815207331
ATP7B	Acute Lymphoblastic Leukemia	0.067204908572908	0.0548676131394815	0.23641767839694			CYB5D2	Acute lymphocytic leukaemia	0.0352618387824272	0.0843077129331409	0.693119804503989
ATP8B2	Acute Lymphoblastic Leukemia	-0.115342	0.0868876391183639	0.22600197499695			CALN1	Acute lymphocytic leukaemia	0.0329447570227367	0.173569204140097	0.866978488734976
ATPAF1	Acute Lymphoblastic Leukemia	0.134187934983504	0.127740585396114	0.328408291686816			CD58	Acute lymphocytic leukaemia	0.192483855798102	0.121622995287096	0.358746503261653
ATPIF1	Acute Lymphoblastic Leukemia	0.0567274407872587	0.0872489152851841	0.526899984033002			PLEKHA4	Acute lymphocytic leukaemia	0.20021997972359	0.196431274216304	0.415297180542609
ATRAID	Acute Lymphoblastic Leukemia	-0.0123501	0.0561661448062468	0.827900028325418			SRL	Acute lymphocytic leukaemia	0.0284042167636807	0.165471857377884	0.872042334847408
AVPI1	Acute Lymphoblastic Leukemia	0.0148453351617185	0.0935704400308656	0.878421603491166			STX6	Acute lymphocytic leukaemia	0.34354344526748	0.273721487226809	0.428293510155673
B3GALTL	Acute Lymphoblastic Leukemia	0.00929198283191371	0.0511292776635548	0.857316844533686			PLD3	Acute lymphocytic leukaemia	-0.439875	0.265448305974524	0.196077018975065
BAG5	Acute Lymphoblastic Leukemia	-0.252934	0.106601625575389	0.0352279229025113			CLEC2A	Acute lymphocytic leukaemia	0.0207469065418428	0.120543401513636	0.871706841149196
BAK1	Acute Lymphoblastic Leukemia	0.0375425789556431	0.0397164502429891	0.350061190031784			CLEC10A	Acute lymphocytic leukaemia	0.176079093721907	0.206661254832577	0.483950905435209
BAZ2B	Acute Lymphoblastic Leukemia	-0.0616974	0.0377193428937695	0.107828938294478			BET1L	Acute lymphocytic leukaemia	0.199684510426497	0.24318536372668	0.497880794192394
BCAS1	Acute Lymphoblastic Leukemia	0.0774486729793534	0.134098259562407	0.579454388034533			SPINK7	Acute lymphocytic leukaemia	0.108642510526075	0.116893189683406	0.388536099515514
BCAT2	Acute Lymphoblastic Leukemia	-0.00829892	0.069501711043631	0.906650287723132			UCMA	Acute lymphocytic leukaemia	-0.0245959	0.0805043224404531	0.766233068892194
BCCIP	Acute Lymphoblastic Leukemia	0.0511029273497459	0.0917373566681425	0.594843040806758			LRRK2	Acute lymphocytic leukaemia	-0.171164	0.226978620492165	0.475386854357871
BCKDK	Acute Lymphoblastic Leukemia	-0.176949	0.0817253458990703	0.0420382563466604			IL5	Acute lymphocytic leukaemia	-0.305478	0.541864413168437	0.673197055622287
BCL10	Acute Lymphoblastic Leukemia	0.046859242891816	0.0742308118094417	0.534679267314963			N6AMT1	Acute lymphocytic leukaemia	-0.125931	0.277790325985865	0.729041484759929
BCL2L13	Acute Lymphoblastic Leukemia	-0.00182121	0.0682775924292115	0.978998245367804			PDXK	Acute lymphocytic leukaemia	-0.0706555	0.192594234891644	0.732305465232126
BCO2	Acute Lymphoblastic Leukemia	0.295782938211204	0.178745524741063	0.173313392862196			REG4	Acute lymphocytic leukaemia	0.0853330236680731	0.102560264039087	0.429527923917239
BECN1	Acute Lymphoblastic Leukemia	-0.00521813	0.0489844460627894	0.916576530906287			HSPB1	Acute lymphocytic leukaemia	-0.0535361	0.0751919258100947	0.499504213289859
BEGAIN	Acute Lymphoblastic Leukemia	-0.00846662	0.0375101785593018	0.822492246566477			CHI3L1	Acute lymphocytic leukaemia	0.138217303645248	0.0921160290418443	0.171884258661986
BIK	Acute Lymphoblastic Leukemia	0.21056578826633	0.0936672052611234	0.0460494405021218			SVEP1	Acute lymphocytic leukaemia	-0.0455661	0.0520115559736152	0.392530270237466
BMP1	Acute Lymphoblastic Leukemia	-0.067616	0.0898358149108006	0.469000496865361			TMEM119	Acute lymphocytic leukaemia	0.308731507362996	0.279101499992733	0.467938007182563
BMP8A	Acute Lymphoblastic Leukemia	-0.0154809	0.0925199006028025	0.871266238645039			C11orf87	Acute lymphocytic leukaemia	-0.180036	0.0824160713856305	0.0604393624900793
BMPR2	Acute Lymphoblastic Leukemia	-0.015857	0.0822946291181133	0.849362788463382			SPATA20	Acute lymphocytic leukaemia	-0.00850941	0.0943950170849444	0.931670314820505
BNIPL	Acute Lymphoblastic Leukemia	-0.104251	0.0506420934011952	0.0500987164368653			RAB17	Acute lymphocytic leukaemia	-0.0743479	0.112068712816071	0.52830117320602
BRIP1	Acute Lymphoblastic Leukemia	0.396525417192547	0.389475775668034	0.49429031293057			NAT14	Acute lymphocytic leukaemia	0.481175287329025	0.294140185860283	0.34930275775004
BRWD1	Acute Lymphoblastic Leukemia	0.0770095465404335	0.0632117699566118	0.246529053105196			TMEM132C	Acute lymphocytic leukaemia	0.0524381725393534	0.230348110427956	0.841074748857996
BST1	Acute Lymphoblastic Leukemia	-0.0145959	0.0317971673363029	0.647927597386568			BMP15	Acute lymphocytic leukaemia	0.0594087518334141	0.139409555007774	0.69193308596233
BTBD1	Acute Lymphoblastic Leukemia	0.0826941697011524	0.0924254269248672	0.391966915454006			CACNB4	Acute lymphocytic leukaemia	-0.379885	0.577303197549246	0.629485667954635
BTBD17	Acute Lymphoblastic Leukemia	-0.0192787	0.13702388506558	0.892073142534298			MTRF1L	Acute lymphocytic leukaemia	0.163738516012805	0.116970589391436	0.394900432124925
BTG2	Acute Lymphoblastic Leukemia	-0.0687649	0.0753609153604622	0.370594675406793			CSF2RB	Acute lymphocytic leukaemia	0.0759346584056017	0.185481400919559	0.721932713642438
BTN2A1	Acute Lymphoblastic Leukemia	0.0123765488528975	0.0457614903160445	0.788544918187964			COL1A1	Acute lymphocytic leukaemia	-0.0360869	0.061602708345322	0.566719864225215
BTN3A1	Acute Lymphoblastic Leukemia	-0.01902	0.0525236968942744	0.719885772039959			ANGPTL1	Acute lymphocytic leukaemia	-0.00469703	0.0673137078364874	0.946321723822135
BTNL3	Acute Lymphoblastic Leukemia	-0.0454743	0.0351450745938833	0.20294040014617			OLFM3	Acute lymphocytic leukaemia	0.266701532563371	0.267193942484962	0.423359714642505
BTNL8	Acute Lymphoblastic Leukemia	0.0857023474174668	0.0525412457416157	0.117093983426921			KIAA1549L	Acute lymphocytic leukaemia	-0.170968	0.0985863839591	0.157905164840065
BYSL	Acute Lymphoblastic Leukemia	0.105985249778103	0.0681017205304846	0.138061487585455			TLR1	Acute lymphocytic leukaemia	0.184334310983388	0.24230814981165	0.502139486557741
C10orf116	Acute Lymphoblastic Leukemia	-0.418591	0.307472473058008	0.306475025758885			KLK13	Acute lymphocytic leukaemia	-0.049561	0.0599207891433269	0.425754289777267
C11orf1	Acute Lymphoblastic Leukemia	0.367065150343218	0.163231080577315	0.110065870665152			NFE2L1	Acute lymphocytic leukaemia	-0.635536	0.524106213387778	0.439014755396344
C11orf80	Acute Lymphoblastic Leukemia	-0.0299307	0.0584069239016282	0.614929479783714			COL6A5	Acute lymphocytic leukaemia	0.0709310080492433	0.318825498348622	0.860637102326062
C12orf43	Acute Lymphoblastic Leukemia	-0.11402	0.0673738223196751	0.100609200496501			RNF122	Acute lymphocytic leukaemia	-0.27658	0.168343948915304	0.198937754085696
C12orf76	Acute Lymphoblastic Leukemia	0.00103588701416593	0.0959819916977599	0.991566338924348			FAM162B	Acute lymphocytic leukaemia	0.394183696308359	0.27363963869655	0.386312424581882
C14orf159	Acute Lymphoblastic Leukemia	-0.0262721	0.0391322340765786	0.506393439574454			MTMR1	Acute lymphocytic leukaemia	-0.0436171	0.109356153807084	0.703808642125613
C16orf93	Acute Lymphoblastic Leukemia	-0.0129391	0.110191820180356	0.910356408870055			MEGF10	Acute lymphocytic leukaemia	0.0708309720733018	0.153615956640365	0.676106456020755
C17orf99	Acute Lymphoblastic Leukemia	-0.186548	0.172858666385076	0.321963182472694			MILR1	Acute lymphocytic leukaemia	0.385363253324505	0.254726149609583	0.227521230096378
C19orf12	Acute Lymphoblastic Leukemia	0.0136563832634128	0.0334140622858721	0.684697129806963			THSD7A	Acute lymphocytic leukaemia	-0.0348522	0.122166331817112	0.793988482636621
C19orf18	Acute Lymphoblastic Leukemia	0.263461468691075	0.204374728481905	0.420019710401866			KRT5	Acute lymphocytic leukaemia	0.0423412905147065	0.137370606296754	0.765782705320746
C19orf35	Acute Lymphoblastic Leukemia	0.0114365698972755	0.0519821162852948	0.827405019769508			SVEP1	Acute lymphocytic leukaemia	-0.00934413	0.0600926603124411	0.878650511824832
C19orf54	Acute Lymphoblastic Leukemia	-0.0535678	0.0498916681943764	0.29181803323172			SMARCC1	Acute lymphocytic leukaemia	-0.0644934	0.119235831773866	0.608063687907547
C19orf66	Acute Lymphoblastic Leukemia	-0.0966422	0.0632732380180317	0.148939952792558			CLEC12A	Acute lymphocytic leukaemia	0.0156965356514433	0.048922183639928	0.752478982803847
C1orf109	Acute Lymphoblastic Leukemia	-0.0523854	0.0826211958052998	0.53705030108332			TINAGL1	Acute lymphocytic leukaemia	-0.012018	0.0810691424248018	0.884425019691191
C1orf131	Acute Lymphoblastic Leukemia	0.059771833753031	0.13852802924625	0.676271964889729			CREB3L1	Acute lymphocytic leukaemia	0.326392411118366	0.258278894093984	0.426167365727086
C1orf145	Acute Lymphoblastic Leukemia	-0.187541	0.121314525085093	0.173085110849292			TBX5	Acute lymphocytic leukaemia	0.277962205125512	0.229320602095881	0.439142777093465
C1QL3	Acute Lymphoblastic Leukemia	0.0543748812751239	0.0747381210819467	0.485390776433611			MSR1	Acute lymphocytic leukaemia	0.213115883826433	0.140258352734113	0.267998163442133
C1QTNF4	Acute Lymphoblastic Leukemia	-0.0404541	0.0838835140638281	0.633365875336133			NAGPA	Acute lymphocytic leukaemia	-0.02235	0.0630364993359258	0.730284712554477
C1R	Acute Lymphoblastic Leukemia	0.0989627673706867	0.162812785036471	0.605125857735627			TBCE	Acute lymphocytic leukaemia	0.0622960665254736	0.163622320129063	0.722759310394348
C20orf196	Acute Lymphoblastic Leukemia	0.0315841001574002	0.0541326741643784	0.56551971248341			TXNDC5	Acute lymphocytic leukaemia	-0.141904	0.130525107234483	0.318692206555544
C20orf197	Acute Lymphoblastic Leukemia	-0.0142986	0.0649358138878586	0.8283407109405			DNAJB9	Acute lymphocytic leukaemia	0.0897577024213274	0.0772771318688255	0.272410494314455
C20orf27	Acute Lymphoblastic Leukemia	0.0432304857404286	0.0384884329628305	0.269454750458481			CDH15	Acute lymphocytic leukaemia	0.0970142006577592	0.109251236612472	0.393547902121926
C22orf29	Acute Lymphoblastic Leukemia	-0.0390313	0.062871792122521	0.540577751054485			TPMT	Acute lymphocytic leukaemia	0.110808313064117	0.093921574637371	0.268325451762664
C3	Acute Lymphoblastic Leukemia	-0.139832	0.296265179714353	0.719261831608308			FGFBP3	Acute lymphocytic leukaemia	0.0408649661533209	0.0615095223001675	0.525137339707493
C4BPA	Acute Lymphoblastic Leukemia	-0.0380846	0.0348238956782808	0.281804059431042			TMEM154	Acute lymphocytic leukaemia	-0.303639	0.134939802082045	0.0591823403777828
C4BPB	Acute Lymphoblastic Leukemia	-0.0208572	0.0719128205659377	0.775104721859784			UBE3A	Acute lymphocytic leukaemia	1.18734043450802	0.633244906600749	0.311915133477183
C5orf22	Acute Lymphoblastic Leukemia	0.01026772721702	0.0968684522394535	0.918194727929581			RIC3	Acute lymphocytic leukaemia	-0.313689	0.16391740204281	0.151572685499312
C6orf163	Acute Lymphoblastic Leukemia	-0.0724911	0.106544339878664	0.518124165838414			PCOLCE	Acute lymphocytic leukaemia	0.0646607682462816	0.11562095571135	0.596233961750578
C6orf3	Acute Lymphoblastic Leukemia	-0.130844	0.0647425507638741	0.0556151265769479			TMPRSS6	Acute lymphocytic leukaemia	-0.0567283	0.0832453665395375	0.505966893531935
C7orf25	Acute Lymphoblastic Leukemia	-0.00468443	0.0382511139443479	0.903296492260096			ASL	Acute lymphocytic leukaemia	0.0803029614549178	0.0940737949698964	0.426077667307321
C7orf29	Acute Lymphoblastic Leukemia	0.0127646833956184	0.0560735666277117	0.822356486087566			TGM1	Acute lymphocytic leukaemia	-0.0870199	0.718711999871396	0.923292987572107
C7orf34	Acute Lymphoblastic Leukemia	0.0518301654694444	0.0751128689356768	0.498976028851174			ADGRF1	Acute lymphocytic leukaemia	0.22706261272005	0.157818705496527	0.223615884058507
C7orf41	Acute Lymphoblastic Leukemia	0.0285728712746964	0.105684224485551	0.800259106381315			NAGS	Acute lymphocytic leukaemia	0.590340232402042	0.361882687842478	0.350095424624526
C7orf49	Acute Lymphoblastic Leukemia	0.0223086335172446	0.0809795973100289	0.788552566151503			UROS	Acute lymphocytic leukaemia	-0.114787	0.0893210211261983	0.268118174052766
C7orf53	Acute Lymphoblastic Leukemia	0.0310999783640889	0.0420402183303129	0.4646717051967			PAPLN	Acute lymphocytic leukaemia	0.382285558296909	0.224961348759591	0.231355752698547
C8orf46	Acute Lymphoblastic Leukemia	-0.00839045	0.0672828005110786	0.901681509705067			QDPR	Acute lymphocytic leukaemia	-0.115478	0.111161107648634	0.375253557685129
C9orf84	Acute Lymphoblastic Leukemia	-0.0190652	0.110990812808649	0.867881902432788			MADCAM1	Acute lymphocytic leukaemia	0.0597147407095935	0.405858679821424	0.907000200696992
C9orf91	Acute Lymphoblastic Leukemia	-0.114884	0.0533918458014677	0.0416950204141576			SUN5	Acute lymphocytic leukaemia	-0.341898	0.165221481263277	0.107311431478554
CA2	Acute Lymphoblastic Leukemia	-0.0410904	0.0579408781860433	0.482782081726149			TRABD	Acute lymphocytic leukaemia	0.162655738156342	0.621764360713279	0.810559741616856
CACNA2D3	Acute Lymphoblastic Leukemia	0.180874566524146	0.103999973937163	0.103932680944406			CASQ1	Acute lymphocytic leukaemia	0.0995683765008017	0.17286798228816	0.595484310059114
CACUL1	Acute Lymphoblastic Leukemia	0.0988692969507663	0.0924253317580861	0.304205312308939			XDH	Acute lymphocytic leukaemia	-0.504619	2.13677832669838	0.852361645421471
CAMK2D	Acute Lymphoblastic Leukemia	0.100063935043887	0.0595044036918842	0.106172531860739			SELPLG	Acute lymphocytic leukaemia	0.0366826202824465	0.0544425483038357	0.507796533880756
CANX	Acute Lymphoblastic Leukemia	-0.0578634	0.0942915936789236	0.554628225643513			CHCHD10	Acute lymphocytic leukaemia	0.50849820034749	0.427465492888223	0.445020613589215
CAPN10	Acute Lymphoblastic Leukemia	-0.129964	0.13043457978239	0.39249579110264			GSTT2B	Acute lymphocytic leukaemia	0.076958359756246	0.122032610567602	0.573044478269436
CAPN12	Acute Lymphoblastic Leukemia	0.0355333709455979	0.0335455460548263	0.294030130783269			LRP1B	Acute lymphocytic leukaemia	-0.158491	0.145632664457233	0.473099249845642
CAPRIN2	Acute Lymphoblastic Leukemia	-0.00674143	0.083067671031438	0.936554135442262			ATF6	Acute lymphocytic leukaemia	-0.00599652	0.0386164224807387	0.878080267357187
CARD8	Acute Lymphoblastic Leukemia	-0.0286182	0.0367020301491163	0.43832845752662			COL11A2	Acute lymphocytic leukaemia	-0.00253269	0.14072102235001	0.985994509120028
CARM1	Acute Lymphoblastic Leukemia	0.0411792724032113	0.169304179885058	0.813950478147152			GAD1	Acute lymphocytic leukaemia	-0.299674	1.2140641941889	0.828060613299146
CASP16	Acute Lymphoblastic Leukemia	-0.00623795	0.230513704716334	0.982776591679713			GRB7	Acute lymphocytic leukaemia	-0.147984	0.144045907932271	0.343881843699145
CASP4	Acute Lymphoblastic Leukemia	-0.258059	0.15909426319883	0.165719509109246			DCAF5	Acute lymphocytic leukaemia	-0.0109982	0.204799031632368	0.960548245778957
CASP6	Acute Lymphoblastic Leukemia	0.00382220009362269	0.168477544779779	0.983324793620392			CYB5A	Acute lymphocytic leukaemia	0.11216249476002	0.290104179914344	0.765134289192227
CASP7	Acute Lymphoblastic Leukemia	0.0855552513499204	0.0388653669361069	0.0318509106979454			NT5C2	Acute lymphocytic leukaemia	0.0213388602475791	0.165804694469661	0.909370734764068
CASP8	Acute Lymphoblastic Leukemia	-0.01947	0.0680824546472244	0.778351251989466			SCARA3	Acute lymphocytic leukaemia	0.230863195512728	0.115972060568828	0.117359494770085
CAST	Acute Lymphoblastic Leukemia	0.0265020426314283	0.0367313008825047	0.474023990058929			LRRN1	Acute lymphocytic leukaemia	0.0241918198743419	0.134967617377751	0.862825785287675
CAV1	Acute Lymphoblastic Leukemia	-0.269562	0.484393596509288	0.676714665406043			TNR	Acute lymphocytic leukaemia	0.195095703286058	0.145541814273102	0.212942588642765
CAV2	Acute Lymphoblastic Leukemia	-0.0161597	0.0453411638293657	0.724034338485686			WWP1	Acute lymphocytic leukaemia	0.0648168711560014	0.189908510260356	0.755380298299699
CBLN3	Acute Lymphoblastic Leukemia	0.0099659819396969	0.0305193074577913	0.745128479617778			CREB3L4	Acute lymphocytic leukaemia	-0.0431211	0.0943104458400758	0.655676299350622
CBWD1	Acute Lymphoblastic Leukemia	0.0851685019604745	0.0809115694461995	0.311691584490953			RAG1	Acute lymphocytic leukaemia	-0.12685	0.154971268830043	0.563315776241126
CCDC102A	Acute Lymphoblastic Leukemia	0.132113529261228	0.0748963440441846	0.108208547819044			PMS2	Acute lymphocytic leukaemia	0.419734533403572	0.27021568541327	0.364139186567685
CCDC114	Acute Lymphoblastic Leukemia	-0.138256	0.109756270868684	0.248162762238128			PCBD1	Acute lymphocytic leukaemia	0.139516167757339	0.120860064608944	0.281668101724207
CCDC132	Acute Lymphoblastic Leukemia	-0.0883511	0.184056456832655	0.678584133599016			PPM1D	Acute lymphocytic leukaemia	0.145352205337116	0.191005305165571	0.502014573495991
CCDC136	Acute Lymphoblastic Leukemia	-0.0146164	0.0996314886689732	0.886280851847136			CHFR	Acute lymphocytic leukaemia	0.208679473625306	0.17219179819828	0.31229359644031
CCDC144B	Acute Lymphoblastic Leukemia	-0.0741941	0.0917492388295197	0.464061224376457			BTG2	Acute lymphocytic leukaemia	0.0908626695888248	0.184399748220898	0.643064604026279
CCDC152	Acute Lymphoblastic Leukemia	-0.0901956	0.0630639360771416	0.167363625831405			CLK2	Acute lymphocytic leukaemia	-0.0753125	0.118774797066483	0.543730321834119
CCDC174	Acute Lymphoblastic Leukemia	0.0726075166404093	0.0626903266260259	0.280189610656404			CSNK2B	Acute lymphocytic leukaemia	-0.0111588	0.322137612537906	0.977956304296988
CCDC176	Acute Lymphoblastic Leukemia	0.590705769621776	0.323693065107076	0.127603005696325			ARHGAP25	Acute lymphocytic leukaemia	-0.0966975	0.124969574512614	0.52001100148837
CCDC24	Acute Lymphoblastic Leukemia	0.000475951939793006	0.043814825689969	0.991386904515863			TALDO1	Acute lymphocytic leukaemia	-0.147885	0.136774134243925	0.340425981550454
CCDC57	Acute Lymphoblastic Leukemia	-0.0219433	0.067303293429716	0.747344582839833			P4HA2	Acute lymphocytic leukaemia	0.140550039658048	0.119698838564793	0.449102596640912
CCDC81	Acute Lymphoblastic Leukemia	0.326557924989096	0.317833522591692	0.491381344737026			NHEJ1	Acute lymphocytic leukaemia	-0.101908	0.196674522422735	0.655973901837062
CCDC92	Acute Lymphoblastic Leukemia	-0.0468917	0.0675955703987576	0.496258508616754			PLCB1	Acute lymphocytic leukaemia	0.875770043752378	0.804382064315548	0.472966923726247
CCHCR1	Acute Lymphoblastic Leukemia	0.0547632295723288	0.0595844783383495	0.371699636177289			GRB10	Acute lymphocytic leukaemia	0.149938372845842	0.160340809734735	0.418707795945997
CCL3L3	Acute Lymphoblastic Leukemia	0.0810407064389302	0.100474130068354	0.436998554396847			RRM1	Acute lymphocytic leukaemia	-0.0457692	0.0411078233007051	0.275727349720717
CCL4L1	Acute Lymphoblastic Leukemia	0.13832518413536	0.08119510821416	0.109075272241725			ADH5	Acute lymphocytic leukaemia	0.0192314214101295	0.307572898517841	0.9525662152106
CCL5	Acute Lymphoblastic Leukemia	0.177080801945211	0.138266729437818	0.2903292129162			INPP5E	Acute lymphocytic leukaemia	-0.278132	0.23618370153341	0.323868165912951
CCR5	Acute Lymphoblastic Leukemia	0.0437779015454558	0.0830936715814092	0.606545467308162			ZNF18	Acute lymphocytic leukaemia	-0.124406	0.131583605423565	0.414177637443405
CCT5	Acute Lymphoblastic Leukemia	0.0256007560449355	0.0710951470121195	0.725597263354418			ADH7	Acute lymphocytic leukaemia	-0.0808079	0.0585721772108661	0.216912255391582
CCT6A	Acute Lymphoblastic Leukemia	-0.0824705	0.0697257686844272	0.254173548132774			SYK	Acute lymphocytic leukaemia	-0.149439	0.206777748644658	0.601601867627227
CCT6P1	Acute Lymphoblastic Leukemia	-0.107699	0.113090879405722	0.359720355029718			RBM24	Acute lymphocytic leukaemia	0.0303579930872285	0.125090340642725	0.817887761830436
CD164	Acute Lymphoblastic Leukemia	0.0200725696640432	0.0918151109074139	0.830620428739403			KRT7	Acute lymphocytic leukaemia	0.08336727427464	0.117910136959619	0.502392586464134
CD1A	Acute Lymphoblastic Leukemia	-0.0303072	0.0378280672222424	0.430287351869953			ATF6B	Acute lymphocytic leukaemia	0.0162215085900437	0.0940403306427678	0.866489365752611
CD1E	Acute Lymphoblastic Leukemia	0.0577574195917076	0.0548256617591726	0.303557156204577			WFDC2	Acute lymphocytic leukaemia	-0.10186	0.322436239523466	0.781991669664236
CD22	Acute Lymphoblastic Leukemia	0.00490101480706982	0.0891113704145999	0.958776904280183			CA8	Acute lymphocytic leukaemia	-0.0678447	0.226829342732131	0.776896619531168
CD226	Acute Lymphoblastic Leukemia	0.0588486999922986	0.0769322088533185	0.452817164525486			MVK	Acute lymphocytic leukaemia	0.0931935349621959	0.0821387619986218	0.319929085348262
CD247	Acute Lymphoblastic Leukemia	0.0521353022152442	0.0680761116824221	0.455655402445951			DNAI1	Acute lymphocytic leukaemia	0.0378540676798856	0.202240263452934	0.863467675469402
CD27-AS1	Acute Lymphoblastic Leukemia	-0.0729841	0.046172023329752	0.122942754752564			RNF146	Acute lymphocytic leukaemia	0.045386829162104	0.127355146617638	0.745146343277136
CD300C	Acute Lymphoblastic Leukemia	0.0176528999394271	0.0370619782854558	0.635776916439845			CARD9	Acute lymphocytic leukaemia	0.287903310301808	0.349060309043012	0.560937191906729
CD300LB	Acute Lymphoblastic Leukemia	-0.0171571	0.044604870423871	0.703126305156614			FBXL4	Acute lymphocytic leukaemia	-0.0583135	0.14819488940217	0.704235140805534
CD300LD	Acute Lymphoblastic Leukemia	0.0281830042248901	0.0463198084675984	0.549418335430051			EHD4	Acute lymphocytic leukaemia	-0.119835	0.309821751021207	0.76504557690147
CD300LF	Acute Lymphoblastic Leukemia	0.0643514554201778	0.0554123902629391	0.260681651001128			FAH	Acute lymphocytic leukaemia	-0.102554	0.0997274683326402	0.343448949432228
CD38	Acute Lymphoblastic Leukemia	0.105084738275489	0.281780039110701	0.772754609002528			RUFY1	Acute lymphocytic leukaemia	0.0986940884556552	0.156214381598356	0.555281784365108
CD44	Acute Lymphoblastic Leukemia	0.0824763947497347	0.084448865841466	0.342440049697832			HNRNPC	Acute lymphocytic leukaemia	0.173993707159171	0.236462221005716	0.50265767575672
CD47	Acute Lymphoblastic Leukemia	0.0418562241190868	0.0406541145904818	0.309247971790243			DTX1	Acute lymphocytic leukaemia	-0.180598	0.119133415369114	0.168007153017433
CD55	Acute Lymphoblastic Leukemia	-0.037112	0.0291321687546593	0.206679389140786			RECQL	Acute lymphocytic leukaemia	0.00766616223025682	0.196387736685451	0.969714001062037
CD6	Acute Lymphoblastic Leukemia	0.0334187415746976	0.0706665265290548	0.64229399961699			PQBP1	Acute lymphocytic leukaemia	-0.173999	0.503296255749198	0.788097609832665
CD69	Acute Lymphoblastic Leukemia	-0.198515	0.124665012155102	0.172174818101797			TCTN2	Acute lymphocytic leukaemia	1.56846423445276	0.682623450090013	0.261328106869855
CD86	Acute Lymphoblastic Leukemia	-0.0888101	0.0643865300437643	0.184691553893394			RHPN2	Acute lymphocytic leukaemia	-0.1246	0.0999395499834183	0.267706867795202
CD93	Acute Lymphoblastic Leukemia	-0.019338	0.0327546156631238	0.557486812437935			SOCS3	Acute lymphocytic leukaemia	-0.0334407	0.0910005127087718	0.724121574558387
CDADC1	Acute Lymphoblastic Leukemia	-0.0590091	0.176095138583423	0.751152973264443			PYGL	Acute lymphocytic leukaemia	0.075711411337431	0.106501541889815	0.500143776578289
CDC25B	Acute Lymphoblastic Leukemia	-0.0133318	0.0471119356789043	0.779520948515594			POLR3F	Acute lymphocytic leukaemia	-0.0911766	0.386030737851328	0.852342853825737
CDC42	Acute Lymphoblastic Leukemia	-0.0284361	0.0426523818984952	0.508892143353414			GALK1	Acute lymphocytic leukaemia	0.0310746391135715	0.208641495757782	0.905875054969886
CDC42EP1	Acute Lymphoblastic Leukemia	0.0439339770255479	0.0393936753536858	0.272797407466096			EIF3G	Acute lymphocytic leukaemia	0.0409250912707924	0.137378221171373	0.78521838762476
CDC42SE1	Acute Lymphoblastic Leukemia	-0.0667429	0.0503911837140648	0.193461957152662			MAGEB10	Acute lymphocytic leukaemia	-0.00472179	0.195358612784773	0.982234918373453
CDHR1	Acute Lymphoblastic Leukemia	0.102472565600436	0.0876423807170836	0.258451555866958			GALE	Acute lymphocytic leukaemia	0.00751624363158906	0.147828370618347	0.961418203177792
CDHR3	Acute Lymphoblastic Leukemia	0.0977483724284756	0.13821306376979	0.505950371923061			ELL	Acute lymphocytic leukaemia	-0.184405	0.183753654274868	0.389540110178107
CDK10	Acute Lymphoblastic Leukemia	-0.0465588	0.0346884973707361	0.185476660816022			RELB	Acute lymphocytic leukaemia	0.117635281312991	0.224399800881032	0.618917647680946
CDK13	Acute Lymphoblastic Leukemia	0.0644913130671873	0.0986713300250949	0.523961851122331			GPR135	Acute lymphocytic leukaemia	0.145638252107186	0.245812883002947	0.595222218890843
CDK19	Acute Lymphoblastic Leukemia	0.00239590264340658	0.0821542651828384	0.977370682856816			RBM19	Acute lymphocytic leukaemia	-0.0568231	0.0608248324403712	0.381292864048223
CDKN1A	Acute Lymphoblastic Leukemia	-0.127654	0.0741602420493966	0.11084537369623			HAVCR2	Acute lymphocytic leukaemia	0.355061240059211	0.707049426113778	0.703726949017528
CEACAM19	Acute Lymphoblastic Leukemia	0.23415015317845	0.136267908725441	0.124063667401382			UBL4A	Acute lymphocytic leukaemia	0.99255077380891	0.948053926979988	0.485405265900553
CEBPZ	Acute Lymphoblastic Leukemia	0.00460443404386991	0.0492768826111895	0.926044913630828			APOL1	Acute lymphocytic leukaemia	0.00760063868439084	0.0739005539765803	0.920115656975304
CECR1	Acute Lymphoblastic Leukemia	-0.0207735	0.0619175133106975	0.741604915943771			CD59	Acute lymphocytic leukaemia	0.00639741619817833	0.103222356267602	0.952982316183249
CELSR2	Acute Lymphoblastic Leukemia	0.0685263006663372	0.0738592594988192	0.366499967481345			FABP1	Acute lymphocytic leukaemia	-3.24738	2.52026354978845	0.420163486456154
CENPB	Acute Lymphoblastic Leukemia	0.0516885704313858	0.161472270230126	0.75822955851744			HMBS	Acute lymphocytic leukaemia	-0.0164707	0.370721652457901	0.967354430430681
CENPN	Acute Lymphoblastic Leukemia	0.290370022429379	0.0990377210531209	0.0262217590327974			LRIT3	Acute lymphocytic leukaemia	0.0790125030180547	0.148282099667279	0.647413631443815
CENPV	Acute Lymphoblastic Leukemia	-0.0132466	0.057741006591137	0.819963107579513			MYSM1	Acute lymphocytic leukaemia	-0.586414	0.552535876730953	0.481069521280164
CEP170B	Acute Lymphoblastic Leukemia	-0.0139599	0.0701148156286806	0.845264117470198			TFR2	Acute lymphocytic leukaemia	0.30191769306852	0.200532168368072	0.271122606949662
CEP97	Acute Lymphoblastic Leukemia	0.116232286424836	0.160908776405774	0.493499485152922			FOXO3	Acute lymphocytic leukaemia	-0.194137	0.625650410088275	0.78568582969466
CERK	Acute Lymphoblastic Leukemia	-0.0499535	0.0597819888846658	0.410716404966284			TMEM230	Acute lymphocytic leukaemia	2.4786521575489	1.63905625136666	0.371949277975635
CERS2	Acute Lymphoblastic Leukemia	0.0374842938691636	0.0934512121171258	0.696020246142837			LIMA1	Acute lymphocytic leukaemia	0.174630715909767	0.218471495446226	0.482533841678814
CFD	Acute Lymphoblastic Leukemia	0.00965482855320468	0.0307959666743088	0.755018317864646			CYGB	Acute lymphocytic leukaemia	-0.133315	0.24748492192567	0.685439651047817
CHAF1A	Acute Lymphoblastic Leukemia	-0.114698	0.122229717701666	0.368197005604175			MUSK	Acute lymphocytic leukaemia	0.00991772347834029	0.120691403556451	0.937180921061965
CHD1L	Acute Lymphoblastic Leukemia	-0.0683042	0.071180204692304	0.347238684248068			ISL1	Acute lymphocytic leukaemia	0.356471732588457	0.28448662928624	0.428800508492588
CHI3L2	Acute Lymphoblastic Leukemia	0.0201466818066548	0.0342694247540015	0.559150134516532			ARFGAP1	Acute lymphocytic leukaemia	-0.134468	0.226582369846723	0.578699677098622
CHRM3-AS2	Acute Lymphoblastic Leukemia	-0.0444105	0.048831811336175	0.378499238336825			SMURF1	Acute lymphocytic leukaemia	0.199475427213719	0.144213969319394	0.398507257974508
CHSY1	Acute Lymphoblastic Leukemia	-0.00765209	0.0427786417993167	0.85967190214851			SYTL4	Acute lymphocytic leukaemia	-0.240186	0.211630406722396	0.319800924125062
CIB2	Acute Lymphoblastic Leukemia	-0.0221712	0.120283614671088	0.858985496726362			ZNF10	Acute lymphocytic leukaemia	-0.116139	1.01682712324025	0.92760093322654
CIB3	Acute Lymphoblastic Leukemia	0.253372283696978	0.279923353102735	0.53166909577314			FKBP1B	Acute lymphocytic leukaemia	-0.0159577	0.122796498671409	0.908495075528543
CIR1	Acute Lymphoblastic Leukemia	-0.0308267	0.08467289651939	0.720888171473837			BCAP29	Acute lymphocytic leukaemia	-0.0276842	0.172060790058425	0.879973058950902
CKM	Acute Lymphoblastic Leukemia	0.125326191534508	0.0792550570828893	0.131220849873761			KLRC3	Acute lymphocytic leukaemia	0.0779633059255716	0.09357791217605	0.451623042555912
CLDN5	Acute Lymphoblastic Leukemia	0.0127162094207827	0.073466577712102	0.863922434775481			DNM2	Acute lymphocytic leukaemia	0.385934149346082	0.485169145690732	0.572211625859573
CLIC3	Acute Lymphoblastic Leukemia	-0.0666615	0.0887778348190017	0.465159703979993			SRSF6	Acute lymphocytic leukaemia	-0.225317	1.41607964025975	0.899547308850516
CLIC4	Acute Lymphoblastic Leukemia	0.0398436996216029	0.0583673991783053	0.504033505833881			MGA	Acute lymphocytic leukaemia	-0.202198	0.409628259545837	0.670459372588556
CLIP2	Acute Lymphoblastic Leukemia	0.0595277113431525	0.134005131600207	0.670292196624746			PRC1	Acute lymphocytic leukaemia	0.137621993586044	0.235066129916241	0.662807795136228
CLMN	Acute Lymphoblastic Leukemia	0.119829752659106	0.0567447401641957	0.0457812110166811			ELAVL1	Acute lymphocytic leukaemia	0.336070620703339	0.18975311883436	0.218558647655323
CLN6	Acute Lymphoblastic Leukemia	0.0374955051577028	0.0538583193753358	0.489814129169857			CXCL9	Acute lymphocytic leukaemia	0.388504763387454	0.315491534485496	0.434209773586996
CMAHP	Acute Lymphoblastic Leukemia	-0.0167403	0.0325204291636586	0.608642409543225			DHX8	Acute lymphocytic leukaemia	-0.019539	0.0778505953276502	0.808154891903714
CMC2	Acute Lymphoblastic Leukemia	0.0684586222014007	0.0833946727026576	0.422442975470631			MAP1LC3B	Acute lymphocytic leukaemia	0.0614428217303602	0.0891242387808716	0.516328842713847
CMPK1	Acute Lymphoblastic Leukemia	-0.0478043	0.122429864687743	0.70303732598919			DAPP1	Acute lymphocytic leukaemia	-0.00110705	0.235914920713069	0.997012639786545
CMTM3	Acute Lymphoblastic Leukemia	-0.0527927	0.0829030573555452	0.533260608795207			ITGAL	Acute lymphocytic leukaemia	0.46241353891026	0.337220589649412	0.401131636777301
CMTM7	Acute Lymphoblastic Leukemia	0.0214193667378617	0.0497992557252146	0.670186610018456			AHSA1	Acute lymphocytic leukaemia	-0.0470151	0.428817866732881	0.922705559336443
CNIH	Acute Lymphoblastic Leukemia	0.0606778004326754	0.279487639934563	0.863899579668378			B3GALT2	Acute lymphocytic leukaemia	0.130051862589331	0.0870136021853449	0.173373386900212
CNR1	Acute Lymphoblastic Leukemia	-0.0169739	0.0600303664413158	0.780008249590931			DTX3L	Acute lymphocytic leukaemia	0.193392324960903	0.556890120730254	0.761526258199802
CNTNAP1	Acute Lymphoblastic Leukemia	0.00185158794610496	0.139885350929688	0.991573894942329			CHST9	Acute lymphocytic leukaemia	-0.0370823	0.0623500765799566	0.564047817751198
CNTNAP3	Acute Lymphoblastic Leukemia	0.15692228903745	0.159160661113178	0.504508209318833			FZD10	Acute lymphocytic leukaemia	0.113177567743842	0.164145440148164	0.521197686739199
CNTROB	Acute Lymphoblastic Leukemia	-0.146179	0.0701674487026789	0.0547479201675479			SMAP1	Acute lymphocytic leukaemia	-0.0273174	0.0670418188040808	0.694349917826688
COL19A1	Acute Lymphoblastic Leukemia	-0.345652	0.272096521796039	0.424552463220846			EVL	Acute lymphocytic leukaemia	0.105174635304927	0.245157592711862	0.685773065704128
COL5A3	Acute Lymphoblastic Leukemia	-0.0220174	0.0418090058716634	0.601980126020789			CLINT1	Acute lymphocytic leukaemia	0.0448263427786701	0.346204739390779	0.908825652626018
COL6A1	Acute Lymphoblastic Leukemia	0.0292973128617946	0.0566185975655949	0.609216593272653			RGS8	Acute lymphocytic leukaemia	0.0266430397941874	0.150805850830326	0.865579376906469
COL6A4P2	Acute Lymphoblastic Leukemia	0.139112189511639	0.0923004346133774	0.162689275022281			TNS2	Acute lymphocytic leukaemia	0.126425010482741	0.160089595761357	0.574459467496941
COL9A2	Acute Lymphoblastic Leukemia	0.0401099492657011	0.092415773398473	0.674495022963986			KIF16B	Acute lymphocytic leukaemia	0.166142289233894	0.193262301887512	0.453182456313502
COMMD5	Acute Lymphoblastic Leukemia	-0.116967	0.0835434089763055	0.186810571064661			GJD2	Acute lymphocytic leukaemia	-0.161999	0.501577793237833	0.767913350800972
COQ6	Acute Lymphoblastic Leukemia	0.0404412931397589	0.0443469005055156	0.372155679194306			AGFG1	Acute lymphocytic leukaemia	-0.0932791	0.191002544551659	0.65876135579678
COX11	Acute Lymphoblastic Leukemia	-0.0886056	0.0604492941759587	0.156854920844186			TXNIP	Acute lymphocytic leukaemia	0.0425013551730317	0.179337640534707	0.824306521601382
COX15	Acute Lymphoblastic Leukemia	0.107618919809248	0.101743328211029	0.325300203449482			GGA3	Acute lymphocytic leukaemia	0.648100853693486	0.69099093938725	0.520383475906401
COX5BP6	Acute Lymphoblastic Leukemia	0.055204992279916	0.0930600970152532	0.571695338946385			SHC4	Acute lymphocytic leukaemia	0.263495575310701	0.193993691249756	0.307302645107954
COX6B1	Acute Lymphoblastic Leukemia	-0.0109104	0.0629839093352016	0.863815626132506			CRABP2	Acute lymphocytic leukaemia	-0.0670288	0.0839159428888912	0.482817676380264
CPA3	Acute Lymphoblastic Leukemia	-0.0853532	0.0988517391463708	0.416492931698662			CPT1B	Acute lymphocytic leukaemia	-0.106213	0.0792457527908745	0.196822972948348
CPNE3	Acute Lymphoblastic Leukemia	-0.047232	0.0575620975499498	0.421580660240817			PPARGC1A	Acute lymphocytic leukaemia	0.649223791901521	0.556432944902107	0.451100288836714
CPNE5	Acute Lymphoblastic Leukemia	0.0810502785462479	0.0996280595046774	0.434857625614024			PIEZO1	Acute lymphocytic leukaemia	0.61171761430761	0.528797676559611	0.453796537971514
CPSF2	Acute Lymphoblastic Leukemia	0.0145446088714894	0.0598012331044404	0.810444685783345			PCDHGB1	Acute lymphocytic leukaemia	0.467413799190623	0.4292622030639	0.337417571381761
CPT2	Acute Lymphoblastic Leukemia	0.114232536352747	0.0883447006849552	0.225072940175367			DLX4	Acute lymphocytic leukaemia	0.00199947000329477	0.139338052303211	0.989451886928274
CPVL	Acute Lymphoblastic Leukemia	-0.0242603	0.0352281473093594	0.495010024001624			AAGAB	Acute lymphocytic leukaemia	0.0898741014342815	0.0775644130119521	0.279993520718716
CREG1	Acute Lymphoblastic Leukemia	0.099727103882493	0.0555298373160081	0.0884280703883023			INTS3	Acute lymphocytic leukaemia	0.262013462676359	0.298556879002111	0.541442416893365
CRHR1-IT1	Acute Lymphoblastic Leukemia	0.074412902757398	0.0430761757572604	0.0901350104329296			IGDCC3	Acute lymphocytic leukaemia	0.214132029465265	0.156157443563261	0.303880677741754
CRIP1P1	Acute Lymphoblastic Leukemia	0.0646316373273541	0.0918786874554436	0.492553632369435			ARHGAP1	Acute lymphocytic leukaemia	-0.097693	0.211986714282887	0.690168859478093
CSNK1D	Acute Lymphoblastic Leukemia	0.0680338220600461	0.081901044747389	0.423815975633902			CRABP1	Acute lymphocytic leukaemia	-0.0812133	0.0879714688125669	0.386629379215785
CSRNP2	Acute Lymphoblastic Leukemia	-0.0417461	0.107590355247662	0.717773311189157			S100A2	Acute lymphocytic leukaemia	-0.0636093	0.169775214474919	0.771784806712317
CSTA	Acute Lymphoblastic Leukemia	0.0389911284770675	0.0419209511031397	0.356968081177631			EMC1	Acute lymphocytic leukaemia	0.0675575808174978	0.180323482646522	0.732839217259606
CTA-126B4.7	Acute Lymphoblastic Leukemia	0.0511302738298048	0.056029723275318	0.374236369362615			TJP1	Acute lymphocytic leukaemia	-0.0153876	0.162903142030746	0.93070036134276
CTA-250D10.23	Acute Lymphoblastic Leukemia	-0.0499783	0.114870267599138	0.685946819315518			CD7	Acute lymphocytic leukaemia	-0.0178311	0.0875822496962651	0.848610026230448
CTA-29F11.1	Acute Lymphoblastic Leukemia	-0.0294852	0.100873449634939	0.773400248455208			PTS	Acute lymphocytic leukaemia	0.34076344127181	0.459400663483106	0.535512508917285
CTB-114C7.4	Acute Lymphoblastic Leukemia	0.0828899796314744	0.0677143512794613	0.246481247031775			SMAD4	Acute lymphocytic leukaemia	-0.0919771	0.473070117335962	0.863801255085045
CTB-55O6.12	Acute Lymphoblastic Leukemia	-0.0808576	0.0637099457348299	0.223726914027397			DES	Acute lymphocytic leukaemia	-0.0870691	0.127118167178115	0.515409989420304
CTB-55O6.8	Acute Lymphoblastic Leukemia	0.149020629049388	0.233952534730868	0.638934518879393			BUB1	Acute lymphocytic leukaemia	0.505102658603127	0.275135110347147	0.20780012783615
CTBP1-AS1	Acute Lymphoblastic Leukemia	-0.0726653	0.0982972754630488	0.476755123488994			HSPA1L	Acute lymphocytic leukaemia	-0.141631	0.153334429418429	0.382670225851496
CTC-429P9.3	Acute Lymphoblastic Leukemia	-0.42773	0.475218994754199	0.463075460142181			TARDBP	Acute lymphocytic leukaemia	0.0759320398704048	0.339894757209329	0.843968053877839
CTC-459F4.3	Acute Lymphoblastic Leukemia	-0.0471	0.0552375003474745	0.407245665294763			RPS6KA1	Acute lymphocytic leukaemia	-0.0139544	0.0888936937549411	0.877673589684049
CTC-462L7.1	Acute Lymphoblastic Leukemia	-0.0442844	0.0644931919251273	0.503517518692028			EEF2K	Acute lymphocytic leukaemia	0.0901374627993488	0.12626903611962	0.549383095956098
CTC-484P3.1	Acute Lymphoblastic Leukemia	0.0417238294250497	0.044732169040438	0.360239719847756			RPIA	Acute lymphocytic leukaemia	0.0884601449815597	0.0925612317896588	0.40973166918468
CTC-490E21.10	Acute Lymphoblastic Leukemia	0.12410638600297	0.193488143526929	0.586948844191953			SHMT1	Acute lymphocytic leukaemia	0.00298407982614156	0.0762313818330678	0.969418474063716
CTC-490G23.2	Acute Lymphoblastic Leukemia	0.0371014793443703	0.0592646794911639	0.535877728415078			EGFLAM	Acute lymphocytic leukaemia	-0.0925297	0.0554213833919843	0.118894242306169
CTC-523E23.1	Acute Lymphoblastic Leukemia	0.0059807723275296	0.0587316496620982	0.919812323054419			DUSP6	Acute lymphocytic leukaemia	0.112087138150723	0.194645529107344	0.622876371767305
CTC-550B14.6	Acute Lymphoblastic Leukemia	0.0964623073963197	0.073119743865526	0.203626200108598			ANAPC10	Acute lymphocytic leukaemia	0.36751238612909	0.326650631143298	0.46256870965114
CTC-550B14.7	Acute Lymphoblastic Leukemia	0.0190835377881536	0.0927387292715283	0.839408852052409			CCM2	Acute lymphocytic leukaemia	0.189972746094916	0.38232641906212	0.668513756759061
CTC-774J1.2	Acute Lymphoblastic Leukemia	-0.0925751	0.0586510528006457	0.148928960179734			ETS2	Acute lymphocytic leukaemia	-0.0517769	0.0884800596712283	0.579751668097202
CTD-2006K23.1	Acute Lymphoblastic Leukemia	0.0551654585577416	0.117684381401775	0.646458479649886			SNAP29	Acute lymphocytic leukaemia	-0.0523467	0.140997436955948	0.77368945951302
CTD-2010I16.1	Acute Lymphoblastic Leukemia	0.101871928245076	0.118272008882369	0.422135030067594			CRYGD	Acute lymphocytic leukaemia	0.145887379548354	0.409673959758584	0.755817317024413
CTD-2017D11.1	Acute Lymphoblastic Leukemia	0.051053820184567	0.0627167736027812	0.42301652907068			APOF	Acute lymphocytic leukaemia	0.0978058215630667	0.0858094475723026	0.287342799453831
CTD-2054N24.2	Acute Lymphoblastic Leukemia	-0.00624174	0.0748070194591301	0.93425789388778			CDKN2D	Acute lymphocytic leukaemia	0.281142887994607	0.123079700890116	0.0711603034170149
CTD-2085J24.4	Acute Lymphoblastic Leukemia	-0.115404	0.103410770193723	0.290529039522021			TAPBP	Acute lymphocytic leukaemia	0.0107341772100526	0.0709181945264735	0.883961485696235
CTD-2192J16.20	Acute Lymphoblastic Leukemia	-0.00392453	0.290293137718825	0.991393928167714			COPS7B	Acute lymphocytic leukaemia	0.00788267317225147	0.0487067242703212	0.873235026617415
CTD-2240H23.2	Acute Lymphoblastic Leukemia	-0.0251438	0.0950975433866378	0.795958172469055			CAPN3	Acute lymphocytic leukaemia	0.00648136286641986	0.302130053864326	0.986345181739793
CTD-2292M16.8	Acute Lymphoblastic Leukemia	0.1509795968964	0.0941804606077785	0.152949578309494			RNPEP	Acute lymphocytic leukaemia	-0.0981602	0.0949758412819447	0.341204792499045
CTD-2349P21.9	Acute Lymphoblastic Leukemia	-0.12282	0.170682744832035	0.60291163860933			PDZD7	Acute lymphocytic leukaemia	0.211148080593827	0.234110693386052	0.462292425307827
CTD-2368P22.1	Acute Lymphoblastic Leukemia	0.171673890319803	0.0814559423449735	0.056776533211256			ARL1	Acute lymphocytic leukaemia	-0.0506755	0.109412694837216	0.667328309475555
CTD-2510F5.4	Acute Lymphoblastic Leukemia	0.0243715189147278	0.110019790734848	0.835537309981263			HIBCH	Acute lymphocytic leukaemia	-0.180434	0.220847054057578	0.563897897446157
CTD-2516F10.2	Acute Lymphoblastic Leukemia	0.049090501616902	0.0727791010346345	0.509614251628604			CCDC50	Acute lymphocytic leukaemia	-0.164417	0.333003931568805	0.647371879519725
CTD-2517M22.14	Acute Lymphoblastic Leukemia	0.0295434055397268	0.0753029860797842	0.701173180870114			UBE2T	Acute lymphocytic leukaemia	0.50230168122375	0.299814334791919	0.342579722149288
CTD-2540F13.2	Acute Lymphoblastic Leukemia	-0.158484	0.157250846806934	0.387772196552603			STAMBPL1	Acute lymphocytic leukaemia	0.229863484861522	0.19747435399173	0.364497581357652
CTD-2561B21.11	Acute Lymphoblastic Leukemia	0.0892173022272272	0.10294200968225	0.411358676300749			MAX	Acute lymphocytic leukaemia	-0.0294502	0.166655641255907	0.888650595636095
CTD-2587H19.1	Acute Lymphoblastic Leukemia	0.0911981288959372	0.0653320490084283	0.18180917337175			EDF1	Acute lymphocytic leukaemia	-0.0496191	0.226508582659093	0.840660411689637
CTD-2623N2.3	Acute Lymphoblastic Leukemia	0.067167978539482	0.0755987244744875	0.400207180907767			TPRKB	Acute lymphocytic leukaemia	-0.208103	0.174251498054096	0.285933839424181
CTD-3099C6.11	Acute Lymphoblastic Leukemia	-0.159938	0.104178856303751	0.168603689080759			GPD1L	Acute lymphocytic leukaemia	-0.0308533	0.0813773229701767	0.711208034348561
CTD-3099C6.9	Acute Lymphoblastic Leukemia	0.146743606237258	0.198552309554598	0.493078886886575			A1CF	Acute lymphocytic leukaemia	0.170502298459013	0.147809316229699	0.367929785530927
CTD-3131K8.2	Acute Lymphoblastic Leukemia	-0.0389478	0.0943342122032379	0.68763453658921			ARF6	Acute lymphocytic leukaemia	-0.433134	0.304887760269871	0.291293141205603
CTD-3138B18.5	Acute Lymphoblastic Leukemia	-0.0878453	0.106760515793837	0.497101433068338			CDC25B	Acute lymphocytic leukaemia	-0.150041	0.207641682721265	0.522163995248942
CTD-3162L10.1	Acute Lymphoblastic Leukemia	0.0466025263546312	0.0942915590620315	0.629383886485618			PELO	Acute lymphocytic leukaemia	0.261444209552338	0.326532487124264	0.570187239104067
CTGLF12P	Acute Lymphoblastic Leukemia	0.0684443671671998	0.0891734407888905	0.477420348748746			CACYBP	Acute lymphocytic leukaemia	-0.0536541	0.111937775216258	0.664482578634167
CTNNA2	Acute Lymphoblastic Leukemia	-0.00723414	0.232238327270725	0.976642485094263			ARL11	Acute lymphocytic leukaemia	0.148974564596739	0.157573749244676	0.387852304123188
CTNNAL1	Acute Lymphoblastic Leukemia	0.124278692985635	0.0390774727711307	0.00389945223763906			GSTO1	Acute lymphocytic leukaemia	-0.0802694	0.0610460668195748	0.208292823583213
CTSC	Acute Lymphoblastic Leukemia	0.0197999973739427	0.0376959617450536	0.601638425603658			ULK3	Acute lymphocytic leukaemia	0.31119916062508	0.267385256299263	0.364548459903174
CTSD	Acute Lymphoblastic Leukemia	-0.0304248	0.0734464741163778	0.68957904347461			IRF9	Acute lymphocytic leukaemia	-0.135294	0.160971049279213	0.55503722931122
CTSF	Acute Lymphoblastic Leukemia	-0.00909046	0.0525557837495683	0.86357136406338			ANKRD27	Acute lymphocytic leukaemia	-0.209154	0.203260455241607	0.361631743707797
CTSS	Acute Lymphoblastic Leukemia	-0.0175943	0.0568034398710541	0.759227351841287			PPIH	Acute lymphocytic leukaemia	0.148438682114249	0.214826838086251	0.52759179034404
CUTA	Acute Lymphoblastic Leukemia	-0.0790349	0.0639054244190269	0.244437981673024			PMVK	Acute lymphocytic leukaemia	-0.0118552	0.126061633840735	0.928137109392048
CWC15	Acute Lymphoblastic Leukemia	0.606066246341674	0.340089335737558	0.172756524046426			BACH1	Acute lymphocytic leukaemia	-0.105054	0.133461745263257	0.466850757414723
CYB5D1	Acute Lymphoblastic Leukemia	0.0008033040219843	0.0414248006312638	0.984661310993701			MYNN	Acute lymphocytic leukaemia	-0.247202	0.337488841618322	0.540088670004643
CYLD	Acute Lymphoblastic Leukemia	0.0574418064447519	0.0689197017184621	0.422314370118442			PFKFB3	Acute lymphocytic leukaemia	-0.0776152	0.125846059773571	0.570773735384874
CYP26B1	Acute Lymphoblastic Leukemia	-0.0294729	0.0414751754792166	0.481444961864849			ADI1	Acute lymphocytic leukaemia	0.0699756179821847	0.197817016614386	0.783548007124334
CYP2D6	Acute Lymphoblastic Leukemia	-0.0018987	0.0594405750840748	0.97479327806201			PLEKHA1	Acute lymphocytic leukaemia	0.171352560706702	0.173044858512132	0.503128192932556
CYP2T2P	Acute Lymphoblastic Leukemia	-0.0139763	0.0422605184830684	0.74267447478827			PSMA7	Acute lymphocytic leukaemia	0.22798317029508	0.114558842217685	0.103237248332996
CYP4F22	Acute Lymphoblastic Leukemia	-0.0124877	0.0360351578177133	0.731275886431124			SIRT5	Acute lymphocytic leukaemia	-0.0877525	0.460698397639866	0.866517654392654
DAAM1	Acute Lymphoblastic Leukemia	0.00591240636082477	0.0465255434994383	0.89972605511958			KLHL13	Acute lymphocytic leukaemia	-0.15456	0.161770613355459	0.383240458486626
DAB2	Acute Lymphoblastic Leukemia	0.060535720921096	0.0442215537310651	0.178478148389526			MAPRE1	Acute lymphocytic leukaemia	-0.00333497	0.357660792417517	0.993406799408694
DARC	Acute Lymphoblastic Leukemia	0.0907753363217205	0.0924362797958182	0.344008298011899			STAU1	Acute lymphocytic leukaemia	0.115336889356029	0.147575009094569	0.469851557591287
DAXX	Acute Lymphoblastic Leukemia	-0.134966	0.111366120069917	0.264861788002171			KCTD5	Acute lymphocytic leukaemia	-0.0125173	0.151368882735082	0.93806763283444
DCAF16	Acute Lymphoblastic Leukemia	-0.146419	0.120989284458793	0.271718599202457			CLIC5	Acute lymphocytic leukaemia	-0.0216185	0.0735233975033335	0.775398617551792
DCHS1	Acute Lymphoblastic Leukemia	0.0594318394230312	0.061352946230687	0.341626483411709			RPL30	Acute lymphocytic leukaemia	-0.0576719	0.195592686110029	0.817460877257134
DCP2	Acute Lymphoblastic Leukemia	0.0743327248632845	0.0873018571275413	0.40885051589877			PRKAR1B	Acute lymphocytic leukaemia	-0.617809	0.459289627843461	0.310809580484338
DCXR	Acute Lymphoblastic Leukemia	0.00241091619786357	0.0309660420931486	0.938294968295119			OTUD5	Acute lymphocytic leukaemia	0.0260758496070321	0.104145929999545	0.812257662264009
DDA1	Acute Lymphoblastic Leukemia	-0.25195	0.244096190678111	0.377911105518067			BPTF	Acute lymphocytic leukaemia	0.359056729350886	0.392330771504029	0.427578086116847
DDAH1	Acute Lymphoblastic Leukemia	0.12283640540382	0.211850575360123	0.620647768240697			PITPNB	Acute lymphocytic leukaemia	-0.0230761	0.101465641446182	0.827642709353857
DDX11	Acute Lymphoblastic Leukemia	-0.0574234	0.0267513177991448	0.0343220914490089			GLRX2	Acute lymphocytic leukaemia	-0.00172107	0.110631702736246	0.988189676705377
DDX39B	Acute Lymphoblastic Leukemia	0.0426671299432671	0.123579180683435	0.73705009108583			MCTS1	Acute lymphocytic leukaemia	-0.296417	0.197493684959098	0.230369147316106
DDX50	Acute Lymphoblastic Leukemia	-0.194352	0.249914726278651	0.579207754719432			LAMTOR3	Acute lymphocytic leukaemia	-0.0105751	0.113522951219578	0.934272484223426
DDX51	Acute Lymphoblastic Leukemia	0.190093236800811	0.13496838707502	0.253751632603416			OTUB2	Acute lymphocytic leukaemia	2.20415272468918	0.868189801235579	0.238876625545808
DDX59	Acute Lymphoblastic Leukemia	-0.00652381	0.0550263546803457	0.906035300409294			GABARAPL2	Acute lymphocytic leukaemia	0.0338109927034653	0.0929528764359183	0.728522917041213
DDX60L	Acute Lymphoblastic Leukemia	-0.00501278	0.0418510658391181	0.905130600177192			NUDT16L1	Acute lymphocytic leukaemia	-0.218296	0.140311693077054	0.363681132141491
DEAF1	Acute Lymphoblastic Leukemia	0.0602228197524858	0.0762452171269375	0.438876277323511			TAX1BP3	Acute lymphocytic leukaemia	0.104325344503595	0.150620054406681	0.51938250540894
DEFA4	Acute Lymphoblastic Leukemia	-0.0101267	0.160873337858293	0.959978770337282			SH3GL2	Acute lymphocytic leukaemia	-0.640035	0.512277875966653	0.429704845906886
DENND1A	Acute Lymphoblastic Leukemia	0.102614945313472	0.0743771346188555	0.184591648636566			UBA2	Acute lymphocytic leukaemia	-0.0463027	0.0853942554988439	0.610947375927654
DEPDC5	Acute Lymphoblastic Leukemia	-0.0160034	0.0911175114719246	0.863509777721136			TBCA	Acute lymphocytic leukaemia	0.149323175484858	0.0791869506009357	0.0919650250987832
DERL1	Acute Lymphoblastic Leukemia	0.133673945378277	0.163818338463378	0.451613889367683			GPR68	Acute lymphocytic leukaemia	-0.0227897	0.263037636559742	0.938850727667799
DEXI	Acute Lymphoblastic Leukemia	0.0711155494035697	0.0662013452170701	0.29386023973912			LMOD1	Acute lymphocytic leukaemia	0.427854134180644	0.283112125591109	0.269839588175328
DFNB31	Acute Lymphoblastic Leukemia	-0.109449	0.0681659617651254	0.12403077023697			COMMD1	Acute lymphocytic leukaemia	0.696230264222035	0.253702653382117	0.111090766770779
DGAT1	Acute Lymphoblastic Leukemia	-0.0277401	0.0612741417868287	0.655182889831978			STAP1	Acute lymphocytic leukaemia	0.104706274882049	0.102466575310309	0.364619094225355
DGCR6L	Acute Lymphoblastic Leukemia	0.0262623790119943	0.0711667873883738	0.730812030489087			SLC41A2	Acute lymphocytic leukaemia	-0.125066	0.120438704041887	0.408142020406637
DHRS4-AS1	Acute Lymphoblastic Leukemia	0.0430701326573897	0.0824674089361247	0.61026810564864			METTL1	Acute lymphocytic leukaemia	-0.261263	0.115650718215152	0.0646308294698696
DHX32	Acute Lymphoblastic Leukemia	0.0121736092691177	0.0427846519264308	0.77705213721841			UCK2	Acute lymphocytic leukaemia	0.114094341056897	0.49960645234296	0.857067249005122
DHX36	Acute Lymphoblastic Leukemia	-0.0711561	0.049587305561739	0.166023626128824			TEAD4	Acute lymphocytic leukaemia	0.395586172224977	0.251556020848531	0.360584075528095
DICER1	Acute Lymphoblastic Leukemia	0.119134746059933	0.111326803553324	0.304025579990918			PDCD5	Acute lymphocytic leukaemia	-0.260278	0.124225943583873	0.127145735988824
DIXDC1	Acute Lymphoblastic Leukemia	0.00679542257968999	0.0578676823777767	0.908077001764008			CDKN2C	Acute lymphocytic leukaemia	-0.106738	0.118946617213368	0.41065166627127
DKK3	Acute Lymphoblastic Leukemia	0.0657823470199585	0.0413369181427027	0.119025941937325			RAD23B	Acute lymphocytic leukaemia	0.356026663769827	0.632658519018608	0.673683315905934
DNAH7	Acute Lymphoblastic Leukemia	0.149089744563315	0.226335041256083	0.539200250619279			SAT2	Acute lymphocytic leukaemia	0.0785578003704718	0.121831736311896	0.554171684543608
DNAI2	Acute Lymphoblastic Leukemia	0.0798462936708311	0.0802676457628434	0.333806695551315			THRA	Acute lymphocytic leukaemia	-0.0782374	0.208632091394054	0.732600921345839
DNAJC1	Acute Lymphoblastic Leukemia	0.231581599028837	0.2016237163348	0.334003781131162			WRNIP1	Acute lymphocytic leukaemia	0.305329345768817	0.235923663023446	0.418808379647914
DNAJC15	Acute Lymphoblastic Leukemia	0.00564777445550249	0.0593146145664527	0.924797178850068			FKBP6	Acute lymphocytic leukaemia	0.0402358775133711	0.0693398612455864	0.573426724050328
DNAJC18	Acute Lymphoblastic Leukemia	-0.0533404	0.0805474267660709	0.519395356879648			CKS1B	Acute lymphocytic leukaemia	-0.138796	0.123948683037835	0.464063713942452
DNAJC27-AS1	Acute Lymphoblastic Leukemia	-0.00418714	0.14882725129611	0.979322015226092			CYTH2	Acute lymphocytic leukaemia	0.34214780508838	0.356332769009616	0.438279536879432
DNAJC27	Acute Lymphoblastic Leukemia	-0.209936	0.06339723901941	0.00474626898769885			PURA	Acute lymphocytic leukaemia	-0.151516	0.541679879653215	0.805970611252498
DNAJC8	Acute Lymphoblastic Leukemia	0.239351348559857	0.591784025454671	0.755319690390872			RHOG	Acute lymphocytic leukaemia	0.258063855332097	0.761961177910159	0.79210661898238
DNASE2	Acute Lymphoblastic Leukemia	0.0483045938394348	0.0425409319702515	0.262319600285562			SMTN	Acute lymphocytic leukaemia	0.0637463745796252	0.231730604324921	0.80110636483209
DND1P1	Acute Lymphoblastic Leukemia	0.045372161930566	0.0563462439147773	0.428588065112663			HPGDS	Acute lymphocytic leukaemia	0.0338929398640991	0.0588100660811446	0.573553645982464
DNHD1	Acute Lymphoblastic Leukemia	0.024874241180881	0.0782735503384141	0.754304285613834			ITCH	Acute lymphocytic leukaemia	-0.0406404	0.112203973644482	0.741212894874222
DNM1	Acute Lymphoblastic Leukemia	-0.00374796	0.148584217986751	0.983944980975201			UBE2C	Acute lymphocytic leukaemia	0.180844228716096	0.158899545538134	0.458936586760939
DNTT	Acute Lymphoblastic Leukemia	0.0819802306353995	0.109515644636301	0.508459979697735			UBASH3B	Acute lymphocytic leukaemia	0.0548898965638858	0.115879475120128	0.668065436147098
DNTTIP2	Acute Lymphoblastic Leukemia	0.0520902954747227	0.103352030966737	0.664294474831172			NT5C	Acute lymphocytic leukaemia	-0.0154076	0.219483896536929	0.955383120671671
DOCK5	Acute Lymphoblastic Leukemia	0.051581495877084	0.0729489100224348	0.487283145675759			PKN1	Acute lymphocytic leukaemia	0.0678818558976573	0.179627806826301	0.730656444199586
DOCK8	Acute Lymphoblastic Leukemia	0.0475857419381655	0.0432105100848958	0.277713047594672			TNFAIP8	Acute lymphocytic leukaemia	-0.121522	0.136675603817334	0.53732110322605
DOK1	Acute Lymphoblastic Leukemia	-0.0067276	0.230707715080381	0.981440971960581			ARL3	Acute lymphocytic leukaemia	-0.134573	0.129653910333174	0.488149880360252
DOK2	Acute Lymphoblastic Leukemia	0.00526162830028439	0.0661040236364169	0.93727803040342			EFS	Acute lymphocytic leukaemia	-0.0600677	0.178273027556155	0.747633928516755
DOK6	Acute Lymphoblastic Leukemia	0.00318591801594265	0.0880395885613922	0.97172799782688			TRIM3	Acute lymphocytic leukaemia	-0.325233	0.176123763189395	0.315965920991236
DPEP2	Acute Lymphoblastic Leukemia	-0.0698273	0.0868662587806582	0.433266091621282			MTHFD1	Acute lymphocytic leukaemia	-0.119694	0.172873000397364	0.514588006139616
DPF2	Acute Lymphoblastic Leukemia	-0.0622508	0.0639224343773497	0.343785902984625			MAGEA3	Acute lymphocytic leukaemia	0.084810342016098	0.0876889352368236	0.377878027352117
DPY19L2	Acute Lymphoblastic Leukemia	-0.0135988	0.0855086205743083	0.876523928983001			FEN1	Acute lymphocytic leukaemia	0.387208090645053	0.560110079903955	0.614929093622332
DSC2	Acute Lymphoblastic Leukemia	-0.283736	0.125385105406905	0.0499381169203648			ARAF	Acute lymphocytic leukaemia	-0.193654	0.175747487339053	0.46916398475311
DSE	Acute Lymphoblastic Leukemia	0.0129242472924159	0.0371684667105738	0.729139954247667			ERCC1	Acute lymphocytic leukaemia	0.320964993107273	0.160143109071817	0.182927845518106
DSEL	Acute Lymphoblastic Leukemia	-0.0470336	0.133312493127744	0.742039589594115			ARL2	Acute lymphocytic leukaemia	0.209634400105783	0.12723627129808	0.127674403336994
DTD1	Acute Lymphoblastic Leukemia	-0.13514	0.0541518464313377	0.0281431406339765			OPHN1	Acute lymphocytic leukaemia	-0.268888	0.653623775706075	0.751541313451488
DTWD2	Acute Lymphoblastic Leukemia	0.0440083105541072	0.116426596162455	0.714197484618646			PDRG1	Acute lymphocytic leukaemia	0.250006674934755	0.188330917450095	0.315603269742873
DTX3L	Acute Lymphoblastic Leukemia	0.104315980838338	0.094343499537548	0.300994383542881			GCA	Acute lymphocytic leukaemia	0.0829913917479658	0.116628719443442	0.550524265843851
DUSP23	Acute Lymphoblastic Leukemia	-0.115041	0.0772575152684744	0.167317461928817			PABPC4	Acute lymphocytic leukaemia	0.0305779393511645	0.165078672757005	0.87013008289289
DVL2	Acute Lymphoblastic Leukemia	0.309766723420177	0.175245467556402	0.17528642841806			SCMH1	Acute lymphocytic leukaemia	0.0422511932629675	0.132774728603361	0.77118590125496
DYNLT1	Acute Lymphoblastic Leukemia	0.0913230139578397	0.0763671284522348	0.254854014265228			EXOSC3	Acute lymphocytic leukaemia	-0.0296149	0.219999183118377	0.914814292342228
E2F4	Acute Lymphoblastic Leukemia	-0.317497	0.241818829581505	0.414382279724624			PSMB1	Acute lymphocytic leukaemia	-0.177357	0.160772138160888	0.384943657518935
EEF1A1	Acute Lymphoblastic Leukemia	0.0437823314035261	0.0502729995314944	0.389010299806027			NRBP1	Acute lymphocytic leukaemia	-0.0531917	0.156459888930485	0.74769562928871
EFCAB2	Acute Lymphoblastic Leukemia	-0.0552282	0.0650291668101609	0.402680533035937			AKR1C1	Acute lymphocytic leukaemia	6.26383406691382	9.65173907986572	0.633522589512674
EFEMP2	Acute Lymphoblastic Leukemia	-0.00894754	0.0553984204913586	0.873233561115426			PPP2R1A	Acute lymphocytic leukaemia	0.67926276583497	0.69093246729297	0.429205716264595
EFTUD2	Acute Lymphoblastic Leukemia	-0.020345	0.0538299114595937	0.707749955113356			JARID2	Acute lymphocytic leukaemia	0.788471776317944	0.818335251153377	0.436954215445732
EGLN2	Acute Lymphoblastic Leukemia	0.0337488417430383	0.0500196092632395	0.504291430927398			ARFIP2	Acute lymphocytic leukaemia	-0.0101215	0.100444063981091	0.922214435711256
EHHADH	Acute Lymphoblastic Leukemia	-0.0280327	0.0758424799790521	0.718685075197154			NAT1	Acute lymphocytic leukaemia	-0.035009	0.132868011363751	0.816838245006465
EHMT1	Acute Lymphoblastic Leukemia	0.0181544510253786	0.0999735500542532	0.860419172687841			PTPN9	Acute lymphocytic leukaemia	1.14645149620847	0.906587697689265	0.425957149346199
EIF2B4	Acute Lymphoblastic Leukemia	-0.166131	0.246689028693845	0.622689329318056			BCAR3	Acute lymphocytic leukaemia	0.110847230084459	0.164868047329895	0.538207549029647
EIF2D	Acute Lymphoblastic Leukemia	0.163862308467681	0.11853082529921	0.260775421606861			TRDMT1	Acute lymphocytic leukaemia	-0.019605	0.080718036894167	0.823756009618916
EIF3F	Acute Lymphoblastic Leukemia	0.0976170472582076	0.0911664720644403	0.309441580943306			CRAT	Acute lymphocytic leukaemia	0.123907355031387	0.256336710101681	0.713354777729881
EIF3G	Acute Lymphoblastic Leukemia	-0.129861	0.0796164921980054	0.128821769073673			INPP5B	Acute lymphocytic leukaemia	0.0474915404031118	0.084208949756538	0.612183635688221
EIF4B	Acute Lymphoblastic Leukemia	0.0442397019149066	0.0839250301889391	0.612401462933275			GNAI3	Acute lymphocytic leukaemia	0.0793447908838931	0.135313244267894	0.61698644432236
ELF2	Acute Lymphoblastic Leukemia	0.162219059514541	0.0806311404048449	0.0672394645821605			CSNK1G2	Acute lymphocytic leukaemia	0.254414884073698	0.506868413667932	0.703848153760698
ELL	Acute Lymphoblastic Leukemia	-0.113366	0.0540074428318841	0.0437875262951875			NAPB	Acute lymphocytic leukaemia	0.132818189141663	0.380097575860092	0.785988448252668
ELMO2	Acute Lymphoblastic Leukemia	0.0632606740001774	0.275490164111758	0.839726458939415			KLC1	Acute lymphocytic leukaemia	0.185818687471275	0.203790850944235	0.458118678844206
ELMOD3	Acute Lymphoblastic Leukemia	-0.0857257	0.207884782895602	0.751001841387071			PANK3	Acute lymphocytic leukaemia	-0.180855	0.201288318314402	0.435140853974326
ELP5	Acute Lymphoblastic Leukemia	-0.0582304	0.0756624180987442	0.455289825434858			TST	Acute lymphocytic leukaemia	0.0383180792988037	0.047231574354527	0.424569256759686
EMID1	Acute Lymphoblastic Leukemia	-0.135721	0.130080447369527	0.48649172594842			GDA	Acute lymphocytic leukaemia	-0.117884	0.0980907810803589	0.274724863832578
ENDOU	Acute Lymphoblastic Leukemia	0.00353172447687529	0.10418220022623	0.976036317438903			VPS4B	Acute lymphocytic leukaemia	0.123009352625355	0.30762217519022	0.727915407982265
ENKUR	Acute Lymphoblastic Leukemia	0.0349669722440474	0.130876951031606	0.800004696802069			SULT1B1	Acute lymphocytic leukaemia	-0.0646296	0.10991948769173	0.577994537854055
ENO1	Acute Lymphoblastic Leukemia	0.0387934042446132	0.0847531618723482	0.656936096565687			PACSIN1	Acute lymphocytic leukaemia	0.0935516246667789	0.0881651326851672	0.323878824180977
ENOSF1	Acute Lymphoblastic Leukemia	0.0119444284445554	0.0554444786306962	0.831112775080243			FLII	Acute lymphocytic leukaemia	-0.104773	0.153419063571679	0.618556306855518
ENPP1	Acute Lymphoblastic Leukemia	-0.238984	0.344996300185561	0.614322679799328			USP21	Acute lymphocytic leukaemia	-0.037911	0.151401660511834	0.818447067988616
ERCC3	Acute Lymphoblastic Leukemia	0.0534007548479902	0.0508818799325521	0.302059503101519			SCIN	Acute lymphocytic leukaemia	0.111590626008745	0.119220388087469	0.448081327544776
ERICH1	Acute Lymphoblastic Leukemia	0.013641974120077	0.0309320994476257	0.660632871268821			HOMER2	Acute lymphocytic leukaemia	-0.01285	0.0595514099551007	0.833496856785005
ESYT2	Acute Lymphoblastic Leukemia	-0.0112465	0.0451999799124393	0.804809123454302			DECR1	Acute lymphocytic leukaemia	0.0571691984191606	0.157679623454492	0.778567779953748
EXOSC10	Acute Lymphoblastic Leukemia	0.0179962018717344	0.368254327672887	0.965465047657064			RPS6KA6	Acute lymphocytic leukaemia	-0.378276	0.936477479308881	0.725357896813319
EXT1	Acute Lymphoblastic Leukemia	-0.0826552	0.054821573236186	0.14807591960803			DOT1L	Acute lymphocytic leukaemia	0.0807713291264148	0.490889209069471	0.89618029724527
EZR	Acute Lymphoblastic Leukemia	-0.0468085	0.0874023384504463	0.601310945159804			SH3BGRL	Acute lymphocytic leukaemia	0.268654207665521	0.369880904252035	0.543141326342875
F2R	Acute Lymphoblastic Leukemia	0.133120210317333	0.0712354534831295	0.077156825717156			ACLY	Acute lymphocytic leukaemia	0.376898640942482	0.308663828959071	0.436844511092415
FADS1	Acute Lymphoblastic Leukemia	0.0301289474919152	0.0434725035239139	0.492720705138954			EIF1B	Acute lymphocytic leukaemia	0.442268274567524	0.403335085916083	0.470709499163437
FADS2	Acute Lymphoblastic Leukemia	0.0225166362985049	0.031941296645106	0.483994440700867			PELI2	Acute lymphocytic leukaemia	0.274026318912168	0.153404750022005	0.324898543637177
FAM101B	Acute Lymphoblastic Leukemia	0.119457985787725	0.0799079988953267	0.15712571461104			SH2D3C	Acute lymphocytic leukaemia	-0.25312	0.126627235361312	0.116257242947992
FAM103A1	Acute Lymphoblastic Leukemia	0.0654702486208422	0.151418824313309	0.740193120586608			CDC42BPA	Acute lymphocytic leukaemia	0.0879861514208347	0.0991614178289751	0.425047071847849
FAM104A	Acute Lymphoblastic Leukemia	0.0777188584780401	0.0515562601147843	0.14530712501168			L3MBTL2	Acute lymphocytic leukaemia	-0.168907	0.706831359182884	0.85067140552844
FAM109A	Acute Lymphoblastic Leukemia	0.0535522576656938	0.159732091219958	0.751035559334533			RGS19	Acute lymphocytic leukaemia	-0.168406	0.0783130488077826	0.0637332374715447
FAM111A	Acute Lymphoblastic Leukemia	0.129053969771126	0.111498976872622	0.330875752331991			AP1G2	Acute lymphocytic leukaemia	0.0528661800096802	0.108788306182471	0.675028656823717
FAM115A	Acute Lymphoblastic Leukemia	0.290794947449038	0.605203711868052	0.71484592706731			DCP1B	Acute lymphocytic leukaemia	0.798385036612483	0.429763962666248	0.204320762027358
FAM117B	Acute Lymphoblastic Leukemia	0.0140948588339628	0.0448584071332957	0.75436953956044			ZNF175	Acute lymphocytic leukaemia	0.0505883312266163	0.19049780820914	0.807782459346869
FAM118B	Acute Lymphoblastic Leukemia	0.0143988027788714	0.0388006144781594	0.712475781935037			UBQLN4	Acute lymphocytic leukaemia	0.464429285608712	0.267837790391792	0.225055963274966
FAM120AOS	Acute Lymphoblastic Leukemia	0.0959506875925103	0.0842365466998521	0.278875343077898			CIRBP	Acute lymphocytic leukaemia	0.177812180552439	0.155246835283881	0.370631873496103
FAM134B	Acute Lymphoblastic Leukemia	0.100124745007503	0.0849298882238198	0.258082201996659			PTGFRN	Acute lymphocytic leukaemia	-0.00759938	0.102023957723988	0.941677363500093
FAM134C	Acute Lymphoblastic Leukemia	0.0397001679907611	0.156825709721103	0.812631633523153			NDC80	Acute lymphocytic leukaemia	-0.433661	0.140983186374289	0.0370763833453906
FAM136A	Acute Lymphoblastic Leukemia	-0.00164011	0.106266905787002	0.988022735987659			PLEKHA7	Acute lymphocytic leukaemia	0.145056383477853	0.174305564099444	0.443216728231134
FAM153C	Acute Lymphoblastic Leukemia	-0.040085	0.0741882152465217	0.600805174446086			MPP7	Acute lymphocytic leukaemia	-0.236109	0.361270457618327	0.631481626781974
FAM157C	Acute Lymphoblastic Leukemia	0.0835919167259575	0.0836922766765882	0.330442518566475			NISCH	Acute lymphocytic leukaemia	0.286233030320338	0.217346966047736	0.413452232958104
FAM173B	Acute Lymphoblastic Leukemia	0.196198068590386	0.245090774697949	0.459743371047779			FEV	Acute lymphocytic leukaemia	0.095367955158238	0.321464539506394	0.794693373171114
FAM177A1	Acute Lymphoblastic Leukemia	0.0101871623784894	0.0599969825542978	0.86679676290585			RBM3	Acute lymphocytic leukaemia	0.147551190649437	0.118440674171816	0.301273337107044
FAM177B	Acute Lymphoblastic Leukemia	-0.10065	0.0742502810272678	0.189642611755064			BRDT	Acute lymphocytic leukaemia	0.28748123669921	0.218546809000737	0.41380609139541
FAM19A1	Acute Lymphoblastic Leukemia	0.0242600736255244	0.0438499133889326	0.582828941019912			ITGB2	Acute lymphocytic leukaemia	-0.0654758	0.24613748445319	0.815142044905699
FAM19A2	Acute Lymphoblastic Leukemia	0.050522410214826	0.0515853783896886	0.332621601176541			CSDC2	Acute lymphocytic leukaemia	0.135886984731142	0.196513217254605	0.527296903305017
FAM206A	Acute Lymphoblastic Leukemia	-0.00369926	0.0903785943162452	0.968084565173637			BACH2	Acute lymphocytic leukaemia	0.311869790946229	0.234124151277038	0.314349958384357
FAM20B	Acute Lymphoblastic Leukemia	0.125050932006107	0.101207434937889	0.242348557078147			GRID2	Acute lymphocytic leukaemia	-0.0290498	0.0388033577674703	0.460792007480555
FAM219B	Acute Lymphoblastic Leukemia	0.00303067980268749	0.0916383601125158	0.974267839396218			ILF3	Acute lymphocytic leukaemia	-0.0476015	0.250952437907916	0.880661580720214
FAM21C	Acute Lymphoblastic Leukemia	0.177015041525865	0.115358962009316	0.143314062276912			ZNF774	Acute lymphocytic leukaemia	0.242706355525606	0.497459564253514	0.673870854470367
FAM22E	Acute Lymphoblastic Leukemia	-0.0381773	0.076025802317733	0.624640661582465			APBB2	Acute lymphocytic leukaemia	-0.0168373	0.111177435620197	0.904314021349995
FAM46C	Acute Lymphoblastic Leukemia	-0.0131921	0.241947784498545	0.959945108881557			ZNF334	Acute lymphocytic leukaemia	0.102898199259532	0.15192047435485	0.620995314012318
FAM63B	Acute Lymphoblastic Leukemia	0.0985714012621008	0.0662474359296382	0.154079670404859			ELMO1	Acute lymphocytic leukaemia	0.442585318159494	0.414081074747504	0.34535458216247
FAM65A	Acute Lymphoblastic Leukemia	-0.029293	0.0956651933829283	0.774725964730655			PPP1R3B	Acute lymphocytic leukaemia	0.0802591309345449	0.145292173596545	0.678709108468641
FAM65B	Acute Lymphoblastic Leukemia	-0.00188828	0.0578521524754572	0.974256165960076			TARBP2	Acute lymphocytic leukaemia	1.40595513955738	0.751139757604507	0.312373580691485
FAM81B	Acute Lymphoblastic Leukemia	-0.12793	0.187352488485851	0.618595192236114			HNRNPM	Acute lymphocytic leukaemia	-0.0035138	0.369268531601901	0.99394237949188
FAM86C1	Acute Lymphoblastic Leukemia	-0.0167469	0.0545245677514664	0.760553781743507			GPCPD1	Acute lymphocytic leukaemia	-0.0463637	0.315469393413447	0.896635121200514
FAM86C2P	Acute Lymphoblastic Leukemia	0.119514680748355	0.154545787942464	0.580935474268212			CCDC51	Acute lymphocytic leukaemia	0.101351939183993	0.219000776620767	0.72406277275678
FAM86FP	Acute Lymphoblastic Leukemia	0.0490880263954933	0.0681342841590902	0.494591240272971			NLRP4	Acute lymphocytic leukaemia	0.671639530375378	0.361253836424944	0.31416015522479
FAM86HP	Acute Lymphoblastic Leukemia	0.0540840323334746	0.0692015535907769	0.447498929397037			SLC4A8	Acute lymphocytic leukaemia	0.302797148874397	0.174034335637923	0.332093044433512
FAM86JP	Acute Lymphoblastic Leukemia	-0.103385	0.128857617390062	0.448743981133625			TPPP2	Acute lymphocytic leukaemia	0.020956795524263	0.326619213104979	0.954676689210442
FAM98C	Acute Lymphoblastic Leukemia	-0.0034564	0.237314537457546	0.990728518272853			ARHGAP30	Acute lymphocytic leukaemia	0.514374246657966	1.10366863999072	0.72235247792416
FANCL	Acute Lymphoblastic Leukemia	0.137010924265607	0.21631177603836	0.640555676047551			ZNF415	Acute lymphocytic leukaemia	0.233277953288788	0.197243799249055	0.44683959617932
FARP1	Acute Lymphoblastic Leukemia	0.101643917368839	0.0864381826795139	0.262431499449537			ACYP2	Acute lymphocytic leukaemia	-0.254713	0.150115201297537	0.231829296278258
FARSA	Acute Lymphoblastic Leukemia	0.231218694313118	0.116168439125994	0.0936674169737244			EHBP1	Acute lymphocytic leukaemia	-0.18042	0.183782403225656	0.505877567227021
FASN	Acute Lymphoblastic Leukemia	0.0240470269892077	0.0716397320614464	0.740618351665142			RNPC3	Acute lymphocytic leukaemia	-0.451063	0.257155890264896	0.221513718195847
FASTKD3	Acute Lymphoblastic Leukemia	-0.0495042	0.0921196522008911	0.614042968476301			GEM	Acute lymphocytic leukaemia	-0.0844026	0.111955096221186	0.464347906678634
FAT2	Acute Lymphoblastic Leukemia	-0.0092666	0.15387330920086	0.955765949347002			SLC14A2	Acute lymphocytic leukaemia	-0.140488	0.134740138242075	0.373735947958427
FBP1	Acute Lymphoblastic Leukemia	-0.0114576	0.0553218345230973	0.838386371037195			GRAP	Acute lymphocytic leukaemia	-0.0633805	0.158057457896913	0.704984946742241
FBXL5	Acute Lymphoblastic Leukemia	0.0197369827445729	0.0758031886188734	0.797898439445966			SLC5A5	Acute lymphocytic leukaemia	-0.153842	0.204997352605926	0.590148158834642
FCHO2	Acute Lymphoblastic Leukemia	-0.0570925	0.0515899190240139	0.273534603040123			RGS3	Acute lymphocytic leukaemia	-0.0210691	0.256677261609582	0.939749859903073
FCRL3	Acute Lymphoblastic Leukemia	-0.0194834	0.031931466906867	0.54362248226573			TESC	Acute lymphocytic leukaemia	-0.0704818	0.0723096159691884	0.367341878150995
FDFT1	Acute Lymphoblastic Leukemia	0.0147985449933225	0.0345077719050797	0.668873444675581			STX10	Acute lymphocytic leukaemia	0.042571715173385	0.119357192920793	0.781888425208064
FER	Acute Lymphoblastic Leukemia	-0.0733729	0.202544528632474	0.778742218262918			SNX17	Acute lymphocytic leukaemia	-0.0132511	0.211739792625878	0.955790983914733
FES	Acute Lymphoblastic Leukemia	0.0118743324534414	0.0440011909064053	0.788586530917756			ARHGEF2	Acute lymphocytic leukaemia	-0.191322	0.289816688016552	0.628547195320509
FEZ2	Acute Lymphoblastic Leukemia	0.000823115579486537	0.0420243102967888	0.98443920047442			POLM	Acute lymphocytic leukaemia	-0.132641	0.253978596494265	0.693601466132706
FGFR2	Acute Lymphoblastic Leukemia	0.00760132671104144	0.0570670070585402	0.894955203311987			CASS4	Acute lymphocytic leukaemia	0.341076183995012	0.235273279991975	0.243010205248535
FGGY	Acute Lymphoblastic Leukemia	0.00844195717123607	0.057533973319319	0.884396555560592			ECI2	Acute lymphocytic leukaemia	-0.0741908	0.0830664272339634	0.406171778232785
FHL2	Acute Lymphoblastic Leukemia	0.0150316789973299	0.0559568867225648	0.793186018869472			NEDD9	Acute lymphocytic leukaemia	0.329192985980803	0.257006711179628	0.421997554159444
FIGNL1	Acute Lymphoblastic Leukemia	-0.0702428	0.0489038837799343	0.157976906565723			NIPAL4	Acute lymphocytic leukaemia	0.191808031780771	0.321928965525751	0.59326115815086
FLJ20373	Acute Lymphoblastic Leukemia	0.0133508882337658	0.0880861076890074	0.882872052747941			DDX6	Acute lymphocytic leukaemia	0.367409709668896	0.223315377176282	0.198468594292269
FLT3	Acute Lymphoblastic Leukemia	-0.0773173	0.20355801501111	0.740612577553349			RDH16	Acute lymphocytic leukaemia	-0.0898473	0.216277319872226	0.718157728862704
FLVCR2	Acute Lymphoblastic Leukemia	0.00674434912630522	0.0523852236182188	0.898479551842824			MICALL2	Acute lymphocytic leukaemia	-0.0700804	0.109571482065837	0.546071240737514
FMO4	Acute Lymphoblastic Leukemia	0.0426775247038877	0.0597221290292737	0.484020754313388			SYTL1	Acute lymphocytic leukaemia	0.235423140569455	0.18155294754115	0.32417441996609
FN1	Acute Lymphoblastic Leukemia	0.058811885019242	0.0749406787659992	0.450774265525344			PAXIP1	Acute lymphocytic leukaemia	0.0576385346764735	0.0995524549995161	0.593644211389146
FNBP1P1	Acute Lymphoblastic Leukemia	0.00850398330668865	0.102321606582243	0.934862777328744			DGKB	Acute lymphocytic leukaemia	0.0406360257554142	0.178945912369063	0.829350019057279
FNDC3A	Acute Lymphoblastic Leukemia	0.0392931392097024	0.104434845386728	0.719679598315659			KRT17	Acute lymphocytic leukaemia	0.243057779876065	0.430330457847092	0.629101222112776
FNDC3B	Acute Lymphoblastic Leukemia	-0.0789882	0.0511208567865228	0.14826873094113			AXIN2	Acute lymphocytic leukaemia	-0.0273775	0.131106165066876	0.844792344557531
FOLR3	Acute Lymphoblastic Leukemia	0.00600998195714843	0.0262841923671622	0.819721449918075			ENOX1	Acute lymphocytic leukaemia	0.0340243553434625	0.0914752386761839	0.718535606496401
FOXO6	Acute Lymphoblastic Leukemia	0.0497865130738813	0.208547011957147	0.850811856226352			HERC5	Acute lymphocytic leukaemia	0.0932810104295539	0.0695157826574672	0.221531356460111
FPGT	Acute Lymphoblastic Leukemia	0.00709373073136485	0.0571334554962681	0.902142960170463			RLBP1	Acute lymphocytic leukaemia	0.0583562091579251	0.125594093042193	0.723094115677639
FTSJD1	Acute Lymphoblastic Leukemia	-0.0372134	0.0458485764561713	0.422804141045017			POLR1C	Acute lymphocytic leukaemia	-0.0799759	0.149400075216458	0.609010612144759
FUCA2	Acute Lymphoblastic Leukemia	0.0863771494069539	0.0585798752369904	0.200350492449655			ALDH3B1	Acute lymphocytic leukaemia	0.188562487885808	0.159982307832453	0.447914607613023
FURIN	Acute Lymphoblastic Leukemia	-0.130798	0.0901398003524369	0.177400469324598			RAB18	Acute lymphocytic leukaemia	0.34133041996653	0.18471490712568	0.205876797900422
FUT10	Acute Lymphoblastic Leukemia	-0.0294214	0.0550244672223723	0.59483534613961			PPARA	Acute lymphocytic leukaemia	-1.00021	1.06662288490607	0.520447845073913
FUT7	Acute Lymphoblastic Leukemia	0.0257457930969103	0.0442067396422221	0.564143047760398			GCK	Acute lymphocytic leukaemia	-0.217614	0.193752282604175	0.304292356776004
FZD1	Acute Lymphoblastic Leukemia	-0.0605179	0.0453780594811701	0.195380670769798			CSRP2	Acute lymphocytic leukaemia	0.335015548962091	0.233359462944102	0.246618616381407
FZD2	Acute Lymphoblastic Leukemia	0.0799026108617373	0.0601508830372365	0.197672264653241			STAU2	Acute lymphocytic leukaemia	0.0444116962758308	0.161080094258442	0.796426856682493
GALM	Acute Lymphoblastic Leukemia	-0.0904719	0.0883701791803717	0.318162260788913			KRT20	Acute lymphocytic leukaemia	0.239216475937018	0.126566456193855	0.117353036758592
GAPT	Acute Lymphoblastic Leukemia	0.0145912948611566	0.0309896560364254	0.639137118373396			LIN7C	Acute lymphocytic leukaemia	0.00631136587690666	0.139377871499965	0.96563508058651
GCC1	Acute Lymphoblastic Leukemia	-0.0963415	0.0762861793970653	0.228808912370786			CUL9	Acute lymphocytic leukaemia	-0.089734	0.122073380353575	0.50306086033927
GDF15	Acute Lymphoblastic Leukemia	-0.0334763	0.105590824740043	0.76195671541567			NPLOC4	Acute lymphocytic leukaemia	-0.0698057	0.186370829013525	0.771849196556348
GDPD5	Acute Lymphoblastic Leukemia	0.0166491964645947	0.0412079598974811	0.688194129900362			LCN10	Acute lymphocytic leukaemia	0.0536119515795762	0.0839210229819804	0.540782644026878
GFI1	Acute Lymphoblastic Leukemia	-0.0223217	0.107031822697838	0.844987418788973			RPS10	Acute lymphocytic leukaemia	-0.0738103	0.141546494221223	0.61813539761905
GGACT	Acute Lymphoblastic Leukemia	0.0559682156285822	0.0501689670968401	0.274801051218545			TP53I11	Acute lymphocytic leukaemia	-0.000336945	0.0755714697409086	0.996510236647287
GGNBP2	Acute Lymphoblastic Leukemia	-0.0792418	0.084583800904681	0.359010357768689			FRS2	Acute lymphocytic leukaemia	-0.127128	0.228572369967001	0.616877253517943
GHITM	Acute Lymphoblastic Leukemia	-0.154727	0.0595086119316629	0.0200961401139227			CBX7	Acute lymphocytic leukaemia	-0.103028	0.260841325607091	0.760519288709362
GIGYF1	Acute Lymphoblastic Leukemia	0.0554061381315223	0.0636972696499443	0.396506414039901			BECN1	Acute lymphocytic leukaemia	0.131670187712706	0.194067544006548	0.534693867464412
GINM1	Acute Lymphoblastic Leukemia	-0.0146593	0.0440615499637985	0.741529422808615			PPP1R8	Acute lymphocytic leukaemia	-0.194834	0.190560101004582	0.381831926524814
GINS3	Acute Lymphoblastic Leukemia	0.176277674893884	0.168529630231451	0.405356724825988			KCNA10	Acute lymphocytic leukaemia	0.306943740075211	0.149440133629001	0.0790671404388499
GIT1	Acute Lymphoblastic Leukemia	-0.0698149	0.0541617243979052	0.205616888752959			TSG101	Acute lymphocytic leukaemia	0.131557793909179	0.118097068401599	0.381213007475327
GIT2	Acute Lymphoblastic Leukemia	-0.1087	0.0911061747559882	0.29875539138958			SLC6A14	Acute lymphocytic leukaemia	0.00793463809906016	0.13733718477564	0.957560864070505
GLB1L2	Acute Lymphoblastic Leukemia	0.200296778839354	0.125405238258709	0.161335930218604			PSD	Acute lymphocytic leukaemia	0.107660916892089	0.0989557094043516	0.308295754145757
GLIS3	Acute Lymphoblastic Leukemia	-0.00433454	0.131833937992688	0.974576758557573			SLC6A16	Acute lymphocytic leukaemia	-0.0143477	0.360717417534581	0.974691544229649
GLRX2	Acute Lymphoblastic Leukemia	0.159897208989934	0.151381880418894	0.401600006717446			RFK	Acute lymphocytic leukaemia	0.352509245813262	0.18087897238239	0.14643572455096
GLT1D1	Acute Lymphoblastic Leukemia	0.094396445310457	0.0668219080126303	0.195456962583164			EDC4	Acute lymphocytic leukaemia	-0.214376	0.121213710652711	0.102352019630649
GLT25D1	Acute Lymphoblastic Leukemia	0.199615280587751	0.0685746824579875	0.00786941911682781			PRKG1	Acute lymphocytic leukaemia	0.2747281455463	0.370445935834302	0.593764729366746
GLTP	Acute Lymphoblastic Leukemia	-0.0798158	0.0787998642860985	0.32717194753838			CCS	Acute lymphocytic leukaemia	-0.0608679	0.129085659493504	0.661830939496083
GLYATL1P1	Acute Lymphoblastic Leukemia	-0.0433534	0.187390732658292	0.838554944760239			ANP32A	Acute lymphocytic leukaemia	1.80361079855721	1.94822636641287	0.524526537684909
GM2A	Acute Lymphoblastic Leukemia	0.0214311967446551	0.030062292072885	0.478770426533639			FXR1	Acute lymphocytic leukaemia	0.0973283165216898	0.149383510158748	0.550240916688956
GMIP	Acute Lymphoblastic Leukemia	-0.072983	0.122004964583139	0.568550226429653			UNC45A	Acute lymphocytic leukaemia	0.643598451053207	0.503002880879388	0.329090741809199
GMNN	Acute Lymphoblastic Leukemia	0.0685424214588814	0.18492612157882	0.746475258852032			BTC	Acute lymphocytic leukaemia	0.00982379440694862	0.195442508669388	0.968027616772678
GNG2	Acute Lymphoblastic Leukemia	-0.0335045	0.137161454487715	0.816728296692314			S100A6	Acute lymphocytic leukaemia	0.0530401236381683	0.162558591683597	0.753748379472056
GNGT2	Acute Lymphoblastic Leukemia	0.00317045528356521	0.0461670150479074	0.945720764562888			SECTM1	Acute lymphocytic leukaemia	0.0195294909006256	0.0839916373911507	0.8227883757161
GNPTG	Acute Lymphoblastic Leukemia	-0.0180024	0.0745987538074806	0.813069452169372			RSPO3	Acute lymphocytic leukaemia	0.089564027990701	0.0885070679420317	0.368804489070415
GOLGA6L5	Acute Lymphoblastic Leukemia	0.0189406485090293	0.0673364770870853	0.782607475356016			REG1A	Acute lymphocytic leukaemia	0.100238954222089	0.107450524122757	0.37285584673817
GOLGA7B	Acute Lymphoblastic Leukemia	0.398429588962491	0.231202026050728	0.226976538212318			BCL2L2	Acute lymphocytic leukaemia	0.115937226104245	0.215575730440222	0.628048759073649
GOLGB1	Acute Lymphoblastic Leukemia	-0.00150674	0.0372342882600336	0.967957839578211			SOST	Acute lymphocytic leukaemia	-0.257074	0.211040897005791	0.277516022896447
GOLM1	Acute Lymphoblastic Leukemia	0.0275616507958037	0.0485211216606076	0.573976357328346			FAM3D	Acute lymphocytic leukaemia	0.0696743370298865	0.0717543254750486	0.346940525815494
GPATCH1	Acute Lymphoblastic Leukemia	0.100465411748364	0.0651740860853455	0.136844057792337			SNAP25	Acute lymphocytic leukaemia	-0.00897244	0.0853187974593319	0.918834860741075
GPATCH11	Acute Lymphoblastic Leukemia	-0.201905	0.264771356791659	0.585247015764854			LYPD3	Acute lymphocytic leukaemia	0.12193234873246	0.120011752573079	0.343451248452275
GPC1	Acute Lymphoblastic Leukemia	0.420676258450503	0.68077428208604	0.647627864939505			NEGR1	Acute lymphocytic leukaemia	0.0828629305805521	0.131339008383648	0.551360153389615
GPM6A	Acute Lymphoblastic Leukemia	-0.0212608	0.0478207989237394	0.660956282080933			BCL6	Acute lymphocytic leukaemia	-0.0568003	0.258044278007302	0.836556568623835
GPNMB	Acute Lymphoblastic Leukemia	0.0900578943151934	0.0502863669245464	0.0822162444024672			FSTL1	Acute lymphocytic leukaemia	-0.020863	0.112191895263205	0.861527254291008
GPR124	Acute Lymphoblastic Leukemia	-0.0492082	0.082548820457398	0.559440840300954			SPP1	Acute lymphocytic leukaemia	0.116516887441977	0.12833052354987	0.415262222744188
GPR162	Acute Lymphoblastic Leukemia	0.00548883805265233	0.037278404551079	0.883547485483516			LUM	Acute lymphocytic leukaemia	-0.0369879	0.105217645896243	0.73248011936985
GPR19	Acute Lymphoblastic Leukemia	0.0659113550184385	0.0717390455955768	0.372756703665894			CD177	Acute lymphocytic leukaemia	0.152938832216516	0.103177652221252	0.172408754072118
GPR25	Acute Lymphoblastic Leukemia	-0.058857	0.110956219155266	0.618502947931475			SMOC1	Acute lymphocytic leukaemia	0.139251217613606	0.150585528373098	0.452728398758691
GPR65	Acute Lymphoblastic Leukemia	-0.0214128	0.0545195658958203	0.698459314553315			SERPINA10	Acute lymphocytic leukaemia	0.0146859684196036	0.0464967971639068	0.755961842305032
GPR89A	Acute Lymphoblastic Leukemia	0.00407799235593361	0.255293170182186	0.989831652030449			FLRT2	Acute lymphocytic leukaemia	0.0490617528976053	0.0732135072391573	0.521651688818507
GRAP2	Acute Lymphoblastic Leukemia	-0.228014	0.171565891308518	0.275878535410532			FLRT3	Acute lymphocytic leukaemia	-0.0270558	0.0777792846416107	0.732220191713415
GRK4	Acute Lymphoblastic Leukemia	-0.0684598	0.0516381032632165	0.197936598688812			ISLR2	Acute lymphocytic leukaemia	0.0774473665144535	0.0674088399649808	0.264847657345656
GS1-124K5.11	Acute Lymphoblastic Leukemia	-0.0667007	0.11659465383464	0.585167050753537			VTN	Acute lymphocytic leukaemia	0.084377807060016	0.0643629681087008	0.20549302770466
GS1-251I9.4	Acute Lymphoblastic Leukemia	-0.13975	0.125902187960789	0.382584345117314			DSC2	Acute lymphocytic leukaemia	0.0940594802848606	0.0978162613683579	0.390708037144421
GSTA4	Acute Lymphoblastic Leukemia	0.110837560102282	0.105706459580675	0.325031065675836			HK1	Acute lymphocytic leukaemia	-0.00497897	0.165131139944286	0.977112673295186
GTF2H5	Acute Lymphoblastic Leukemia	0.0570086446567239	0.03717050262509	0.131667295350758			SEMA5A	Acute lymphocytic leukaemia	-0.0579588	0.0573814744366933	0.336280763589159
GTPBP3	Acute Lymphoblastic Leukemia	-0.0488395	0.123833378195529	0.701567914326861			LTBP4	Acute lymphocytic leukaemia	-0.166675	0.143189140060558	0.282550866798596
GTPBP4	Acute Lymphoblastic Leukemia	-0.116574	0.0570659224641172	0.0505893742050623			MDM2	Acute lymphocytic leukaemia	-0.155592	0.333654860168042	0.722211812751972
GUCY1A3	Acute Lymphoblastic Leukemia	0.0908626499494408	0.104705	0.434468018272313			MDM4	Acute lymphocytic leukaemia	-0.254453	1.43645470901805	0.888387085704359
GUSB	Acute Lymphoblastic Leukemia	-0.0355716	0.0723550515948074	0.636188356240196			IGHG4	Acute lymphocytic leukaemia	-0.135798	1.54126609731237	0.944053242442505
GXYLT1	Acute Lymphoblastic Leukemia	-0.0640029	0.054840397311662	0.255674541429661			WNT3A	Acute lymphocytic leukaemia	-0.100028	0.0810148532164565	0.245172464107516
GZMA	Acute Lymphoblastic Leukemia	0.00301413422380719	0.11095077261598	0.979377941525553			SHANK3	Acute lymphocytic leukaemia	-0.0350256	0.0558927209588168	0.544923202076533
H1FX	Acute Lymphoblastic Leukemia	0.0473530749195514	0.133622738203522	0.737510734460607			WNT5A	Acute lymphocytic leukaemia	0.0480643326981413	0.0923915843136191	0.608618517438606
HADH	Acute Lymphoblastic Leukemia	0.0722317887190854	0.0932970130116072	0.456718670505094			DEFB113	Acute lymphocytic leukaemia	0.13491276555753	0.365967644351902	0.775152863674772
HADHA	Acute Lymphoblastic Leukemia	0.0737726428994473	0.0983442469204624	0.477616822178555			CYB561D1	Acute lymphocytic leukaemia	0.454863109901833	0.233197017707968	0.146194758193143
HADHB	Acute Lymphoblastic Leukemia	0.143436679407693	0.199283967911555	0.523678885814246			C5orf63	Acute lymphocytic leukaemia	0.019423107765549	0.136949606587558	0.896205704615367
HAR1A	Acute Lymphoblastic Leukemia	-0.0388604	0.0477499868929226	0.422609553290777			B4GALT1	Acute lymphocytic leukaemia	0.11424077861353	0.0889009100800735	0.230863723751281
HBM	Acute Lymphoblastic Leukemia	-0.135902	0.0860243726793399	0.142456494607769			RNF34	Acute lymphocytic leukaemia	0.0697605611970679	0.231608383562733	0.791691221478046
HBP1	Acute Lymphoblastic Leukemia	-0.0731399	0.239597884490832	0.772466409947032			PCSK1	Acute lymphocytic leukaemia	0.0842092936541417	0.072587705482911	0.270566657625346
HBQ1	Acute Lymphoblastic Leukemia	0.0511434383852455	0.0596998986375111	0.401294708282294			ATP1B1	Acute lymphocytic leukaemia	0.00945970586124082	0.157409062257997	0.954406995140776
HCG22	Acute Lymphoblastic Leukemia	-0.0475359	0.0750477857835241	0.533644292293463			DEFB4A	Acute lymphocytic leukaemia	0.117591850788932	0.0964368499093417	0.277084031867533
HCP5	Acute Lymphoblastic Leukemia	-0.0733445	0.109629768222212	0.52837006013619			RELL1	Acute lymphocytic leukaemia	-0.035302	0.220310493055776	0.882875616463254
HDAC7	Acute Lymphoblastic Leukemia	0.0733321014357529	0.126075831398468	0.601624466501304			SPINK2	Acute lymphocytic leukaemia	0.0424589484797738	0.13885768718134	0.779767562667725
HDDC3	Acute Lymphoblastic Leukemia	-0.15579	0.115360688630825	0.206637149419245			TMEM132D	Acute lymphocytic leukaemia	-0.0180733	0.0528180971147153	0.739298651647096
HEG1	Acute Lymphoblastic Leukemia	-0.0787011	0.0573707609826719	0.186983606460134			MAN1C1	Acute lymphocytic leukaemia	-0.0468579	0.0699542064844162	0.514684422379765
HELLS	Acute Lymphoblastic Leukemia	0.0802048589916607	0.0651938048240851	0.227046810399389			WFDC10A	Acute lymphocytic leukaemia	0.136367284899114	0.280156799661648	0.67455100475355
HERC2	Acute Lymphoblastic Leukemia	-0.0731003	0.0538871472958723	0.202113697386056			PARVA	Acute lymphocytic leukaemia	-0.0514827	0.151419331730112	0.756269573425919
HERC6	Acute Lymphoblastic Leukemia	-0.201001	0.0681909532171291	0.013265809054546			IL20RB	Acute lymphocytic leukaemia	-0.148895	0.180094603190253	0.56019338673884
HIPK2	Acute Lymphoblastic Leukemia	0.0596446474104131	0.394592200287252	0.893722491027383			IQCF3	Acute lymphocytic leukaemia	0.231709235842238	0.227029670211721	0.414797504023457
HIVEP1	Acute Lymphoblastic Leukemia	0.060965635322662	0.0789861086163038	0.458053729818148			DIXDC1	Acute lymphocytic leukaemia	-0.591947	0.27332450568814	0.162704447948097
HIVEP3	Acute Lymphoblastic Leukemia	-0.0442156	0.0692324093090868	0.528855281357203			SPRN	Acute lymphocytic leukaemia	-0.0199853	0.0884772897833258	0.830237299366503
HLA-DOA	Acute Lymphoblastic Leukemia	-0.0730381	0.0806092521394277	0.380225704507567			USP8	Acute lymphocytic leukaemia	0.00838387287602439	0.0997531684142229	0.936281008372968
HLA-DPB2	Acute Lymphoblastic Leukemia	-0.0441736	0.0451435490031521	0.334009484221354			FNDC4	Acute lymphocytic leukaemia	0.190241923539038	0.193603149318098	0.505574561848332
HLA-H	Acute Lymphoblastic Leukemia	0.0568800450284961	0.111503801327294	0.622243432127442			SMIM13	Acute lymphocytic leukaemia	0.240250494841961	0.340919213536973	0.553998366780686
HLA-U	Acute Lymphoblastic Leukemia	0.0676035238561313	0.0864989183939796	0.445226110139256			MRPL33	Acute lymphocytic leukaemia	0.258495757468815	0.104836511441354	0.035821886042665
HMGCR	Acute Lymphoblastic Leukemia	0.143497026457533	0.111758507740433	0.255421981742526			CHAD	Acute lymphocytic leukaemia	0.0251871676451295	0.142390044204405	0.862810805380817
HMGN1	Acute Lymphoblastic Leukemia	-0.0235298	0.0532282085390211	0.662103987291203			PXDN	Acute lymphocytic leukaemia	0.185449983519486	0.130153391893384	0.290247299489222
HMOX1	Acute Lymphoblastic Leukemia	0.0279241727883947	0.0730218926728392	0.708845291347903			RCAN1	Acute lymphocytic leukaemia	-0.107582	0.17592902577927	0.573910709345189
HNMT	Acute Lymphoblastic Leukemia	-0.0103477	0.057112109541993	0.857685950725554			NEURL4	Acute lymphocytic leukaemia	-0.209293	0.232523737655085	0.463065703168027
HOXA1	Acute Lymphoblastic Leukemia	-0.0544666	0.0898611846808326	0.556736541490081			PTH1R	Acute lymphocytic leukaemia	0.303751585675833	0.16366835663124	0.204608966403302
HPCAL4	Acute Lymphoblastic Leukemia	-0.0266045	0.0410911839162618	0.519656780436472			ITPKA	Acute lymphocytic leukaemia	0.374304840887762	0.2765800563139	0.30861551099895
HPS6	Acute Lymphoblastic Leukemia	0.138313078767092	0.0766650888548276	0.104705391028557			LTB4R	Acute lymphocytic leukaemia	0.015766140778986	0.13718992559079	0.914044833414487
HRK	Acute Lymphoblastic Leukemia	0.0330161776347636	0.0464047550488449	0.481939930106982			FAM171A2	Acute lymphocytic leukaemia	0.271195418280398	0.451192298024694	0.580198098116572
HSD17B1	Acute Lymphoblastic Leukemia	0.0133572774303899	0.0969908300949452	0.895838284777913			CNOT1	Acute lymphocytic leukaemia	0.167047337374051	0.473773594855071	0.784199027512121
HSD17B12	Acute Lymphoblastic Leukemia	0.0113182712794799	0.0444558705939477	0.800249091204175			TMEM87B	Acute lymphocytic leukaemia	0.0921234512103005	0.650141467377327	0.910389103695128
HSD17B14	Acute Lymphoblastic Leukemia	0.0330917746335188	0.0538724061756854	0.552759863754452			ARFIP1	Acute lymphocytic leukaemia	-0.0304569	0.0860050263608768	0.746669615912544
HSD17B7	Acute Lymphoblastic Leukemia	0.192219627458522	0.135898696121933	0.206969833469953			PDE6D	Acute lymphocytic leukaemia	0.191420603785075	0.268881939660029	0.606138156240236
HSD17B7P2	Acute Lymphoblastic Leukemia	-0.0257033	0.0887394587862416	0.775804685549258			GRID1	Acute lymphocytic leukaemia	0.346186959989783	0.187719144367429	0.138924254457134
HSD3B7	Acute Lymphoblastic Leukemia	-0.0566419	0.077241285219066	0.473360345739574			HCAR2	Acute lymphocytic leukaemia	0.50910809257576	0.281835875320171	0.321870726668463
HSP90AA1	Acute Lymphoblastic Leukemia	0.0247303126626794	0.0725380019185976	0.738219305890039			EIF3J	Acute lymphocytic leukaemia	0.0106413821791447	0.194930902774744	0.965281047923487
HSPA1B	Acute Lymphoblastic Leukemia	0.0474863592846068	0.06425897534983	0.46739183472871			MIOX	Acute lymphocytic leukaemia	-0.0514544	0.10091244975548	0.645271246672108
HSPG2	Acute Lymphoblastic Leukemia	0.0703110814208882	0.105504599304192	0.515971018146494			F8	Acute lymphocytic leukaemia	0.0389586643288387	0.0512856201388473	0.459242204069112
HTATIP2	Acute Lymphoblastic Leukemia	-0.046751	0.0395338710426741	0.242933777492446			SLC35G2	Acute lymphocytic leukaemia	-0.0772491	0.0698303386288642	0.290307370431296
HTRA2	Acute Lymphoblastic Leukemia	-0.0370341	0.218234238003454	0.892985954991373			SLC26A11	Acute lymphocytic leukaemia	0.21811736744063	0.143524783049405	0.203210767548899
HYAL3	Acute Lymphoblastic Leukemia	0.0208236405279069	0.0865759071265089	0.811183460674433			DUS2	Acute lymphocytic leukaemia	0.061407893994674	0.19594345023137	0.774505545355226
ICA1L	Acute Lymphoblastic Leukemia	-0.0366596	0.0790041442023084	0.646647563781526			TRADD	Acute lymphocytic leukaemia	-0.14814	0.101740725599065	0.188717607904639
ID3	Acute Lymphoblastic Leukemia	-0.0564097	0.154216977215327	0.722147342707321			SCAMP5	Acute lymphocytic leukaemia	1.84326314089334	0.970303812887624	0.308472938657762
IFI27	Acute Lymphoblastic Leukemia	-0.0703827	0.0748632976602973	0.367328165151981			ATP2A3	Acute lymphocytic leukaemia	0.196833697036695	0.0989096325608826	0.0937114052128033
IFIT5	Acute Lymphoblastic Leukemia	0.018590145927877	0.0424878388372388	0.664752812392123			RAB35	Acute lymphocytic leukaemia	0.18792266657357	0.515396343342288	0.733855578669548
IFNG-AS1	Acute Lymphoblastic Leukemia	-0.0756758	0.0418086552002672	0.0786420063583356			RPRD1A	Acute lymphocytic leukaemia	-0.0422318	0.161200050511013	0.817848545672907
IFNGR1	Acute Lymphoblastic Leukemia	0.0120093603012933	0.0653675259876722	0.857904509228868			EMC4	Acute lymphocytic leukaemia	-0.210361	0.133276219524582	0.17530868659646
IFRD1	Acute Lymphoblastic Leukemia	0.0418078166432755	0.0491869728860269	0.39964685250186			PTCHD3	Acute lymphocytic leukaemia	0.279629225332565	0.239961423287082	0.451491784095317
IFT57	Acute Lymphoblastic Leukemia	0.078847151440982	0.0922043305194159	0.410715200261041			ASAP2	Acute lymphocytic leukaemia	-0.0799488	0.0836211284836135	0.393171729688366
IFT74	Acute Lymphoblastic Leukemia	0.0675104086249249	0.0629673945192313	0.306612086115236			ARHGEF25	Acute lymphocytic leukaemia	-0.100716	0.122827147937591	0.472310673784586
IGFBP7	Acute Lymphoblastic Leukemia	-0.0217178	0.0657009808563229	0.743734605186818			HS6ST2	Acute lymphocytic leukaemia	0.0583171205742528	0.143900861895436	0.699341279308481
IGHV1-46	Acute Lymphoblastic Leukemia	0.00695039642776848	0.164630526598045	0.968977503710191			KCNG4	Acute lymphocytic leukaemia	0.0727074040348957	0.150094580429924	0.648568228369528
IGHV1-69	Acute Lymphoblastic Leukemia	0.0627945314695678	0.129985148119283	0.637725739248701			NAP1L2	Acute lymphocytic leukaemia	-0.259047	0.226600030143269	0.316730968176515
IGHV3-20	Acute Lymphoblastic Leukemia	-0.0880978	0.092957406948105	0.379860993808473			UTS2R	Acute lymphocytic leukaemia	-0.0685626	4.47351745020014	0.990243714009807
IGHV3-66	Acute Lymphoblastic Leukemia	-0.0743846	0.0815610684060085	0.377200273211564			MYOM2	Acute lymphocytic leukaemia	-0.15739	0.163826967177705	0.364832192374338
IGHV3-73	Acute Lymphoblastic Leukemia	0.0860431126677875	0.852744929658818	0.935980881548013			POLI	Acute lymphocytic leukaemia	0.0119252706068088	0.121597742327794	0.930819137286855
IGHV4-28	Acute Lymphoblastic Leukemia	-0.0840188	0.160585650072998	0.693125928855825			KCNN1	Acute lymphocytic leukaemia	0.0266398641625612	0.202947687911807	0.903874220684657
IGHV4-39	Acute Lymphoblastic Leukemia	0.00244578495489534	0.0849922751918086	0.977846038325296			GPR26	Acute lymphocytic leukaemia	0.0209582248171435	0.196594105743151	0.921830198302106
IGHVIII-67-4	Acute Lymphoblastic Leukemia	0.243290513544094	0.148860356142785	0.177523445180669			MYCT1	Acute lymphocytic leukaemia	0.277198060520393	0.160767361028861	0.226810133139609
IGLV1-41	Acute Lymphoblastic Leukemia	0.00835726866827984	0.059668163949972	0.890605767035623			EIF1AD	Acute lymphocytic leukaemia	-0.132801	0.106616212967145	0.301330763377235
IGLV3-12	Acute Lymphoblastic Leukemia	-0.0115975	0.1047299058086	0.914015790918052			ADAM29	Acute lymphocytic leukaemia	0.317392974234296	0.247217895313907	0.421278687569435
IGLV3-19	Acute Lymphoblastic Leukemia	-0.195669	0.211645255748289	0.524957055976763			SWAP70	Acute lymphocytic leukaemia	-0.0707197	0.10581237402003	0.522722242203827
IGSF6	Acute Lymphoblastic Leukemia	-0.016186	0.12051325476486	0.896114053257788			REPIN1	Acute lymphocytic leukaemia	0.239583556907182	0.191278306576255	0.336979604588206
IKBIP	Acute Lymphoblastic Leukemia	-0.148789	0.0584244654557408	0.0174113828796884			ACBD7	Acute lymphocytic leukaemia	-0.412254	0.296590144720897	0.397028406481001
IKBKAP	Acute Lymphoblastic Leukemia	-0.0319035	0.104601836954578	0.767302108570357			RBL2	Acute lymphocytic leukaemia	-0.0475771	0.0693580507868634	0.512121771551805
IKZF1	Acute Lymphoblastic Leukemia	-0.0341404	0.0396496352402605	0.394609867028292			SSU72	Acute lymphocytic leukaemia	-0.235417	0.243279315646712	0.370575024925497
IL10	Acute Lymphoblastic Leukemia	-0.0053511	0.124414605599732	0.967754786971848			PSMD4	Acute lymphocytic leukaemia	-0.450143	1.46232734466742	0.80989160866211
IL12RB1	Acute Lymphoblastic Leukemia	0.0301058421749402	0.0424483363482275	0.483159827638816			HDLBP	Acute lymphocytic leukaemia	0.310681429972174	0.261864574558818	0.445851000932953
IL16	Acute Lymphoblastic Leukemia	-0.0155253	0.0599469793614591	0.797767789099458			PSMD11	Acute lymphocytic leukaemia	0.361657934097812	0.262232910430573	0.399392459326469
IL18BP	Acute Lymphoblastic Leukemia	-0.00382235	0.113559425202026	0.974240499502942			RND1	Acute lymphocytic leukaemia	-0.274059	0.461533903918987	0.594442890822977
IL1R2	Acute Lymphoblastic Leukemia	-0.109946	0.0654188636440159	0.10636426252648			DVL2	Acute lymphocytic leukaemia	0.0943257601002452	0.087008948779336	0.319952131082382
IL1RAP	Acute Lymphoblastic Leukemia	0.059943059123577	0.0682382658049214	0.405316018802591			RACGAP1	Acute lymphocytic leukaemia	0.079777780390383	0.0827845358375253	0.357931232631912
IL7R	Acute Lymphoblastic Leukemia	-0.0912719	0.0746046544310993	0.235394973988812			APBB3	Acute lymphocytic leukaemia	-0.730088	0.270539955297055	0.114255298282955
ILDR1	Acute Lymphoblastic Leukemia	-0.12187	0.06926712624016	0.128998241513802			REXO2	Acute lymphocytic leukaemia	-0.115366	0.149576171410089	0.581750714864657
ILKAP	Acute Lymphoblastic Leukemia	-0.0698564	0.164346058844595	0.744130510971667			THTPA	Acute lymphocytic leukaemia	-0.165907	0.286772427176365	0.603477667909311
ILVBL	Acute Lymphoblastic Leukemia	-0.109646	0.0804489426088728	0.215122880688349			RAB27B	Acute lymphocytic leukaemia	0.201955610735413	0.128468626352474	0.25656314151739
IMMP2L	Acute Lymphoblastic Leukemia	0.0386468705476486	0.0573337154091341	0.503640978818086			RAB31	Acute lymphocytic leukaemia	-0.740078	1.34486893749389	0.679734517393067
INO80B	Acute Lymphoblastic Leukemia	-0.118428	0.153470052111512	0.465556999498567			RABEPK	Acute lymphocytic leukaemia	-0.0656872	0.148864448373818	0.67233612751245
INPP5B	Acute Lymphoblastic Leukemia	-0.053202	0.0381268821319072	0.168217436434937			RFESD	Acute lymphocytic leukaemia	0.231487109616894	0.141348475361601	0.243138573419588
INPP5K	Acute Lymphoblastic Leukemia	0.0380006461921705	0.0653546085613479	0.569036895624246			NEURL1	Acute lymphocytic leukaemia	0.0125955592899474	0.138480737185997	0.931900829917646
INTS10	Acute Lymphoblastic Leukemia	-8.85424e-05	0.0549223576029788	0.99872370867904			ANXA10	Acute lymphocytic leukaemia	0.134670325445408	0.127486758054573	0.368352713646886
INTS6	Acute Lymphoblastic Leukemia	-0.0256306	0.0602237228481632	0.675452230180189			MAGEA10	Acute lymphocytic leukaemia	0.101605114103339	0.182792325178267	0.634195925489463
IRF5	Acute Lymphoblastic Leukemia	-0.0600616	0.0383016178004079	0.122918606260102			AK5	Acute lymphocytic leukaemia	0.0821721530388048	0.131722743319578	0.576957660642975
IRS1	Acute Lymphoblastic Leukemia	-0.0130837	0.059174408197907	0.827645786044317			CREBBP	Acute lymphocytic leukaemia	-0.0362386	0.0554353646897004	0.528043953913732
ISCA2	Acute Lymphoblastic Leukemia	-0.0709439	0.06533346413746	0.2849575879721			MAD1L1	Acute lymphocytic leukaemia	-0.0705521	0.181465000474182	0.72338193708748
ISG20	Acute Lymphoblastic Leukemia	0.103519315918418	0.0676211529511473	0.135332105750623			AP2A2	Acute lymphocytic leukaemia	0.34253089498802	0.422857815326607	0.5029751017168
ISG20L2	Acute Lymphoblastic Leukemia	0.233010243658357	0.193561533820841	0.314987938597046			PPP2R5A	Acute lymphocytic leukaemia	-0.115643	0.315700990163485	0.776466015369857
ISOC2	Acute Lymphoblastic Leukemia	-0.116678	0.102779868328222	0.289148421148633			NADK	Acute lymphocytic leukaemia	-0.102152	0.158335121940023	0.5647646049841
ITFG2	Acute Lymphoblastic Leukemia	-0.0308754	0.0853646800701097	0.725110591851415			GRB14	Acute lymphocytic leukaemia	-0.459205	0.182387734907382	0.0533216559679195
ITGA4	Acute Lymphoblastic Leukemia	-0.0574402	0.0480104533959119	0.237802536168692			RBBP5	Acute lymphocytic leukaemia	0.27277044635083	0.208232339023581	0.415089243406517
ITGAD	Acute Lymphoblastic Leukemia	-0.106498	0.0566538662381704	0.0709676585271782			ZYX	Acute lymphocytic leukaemia	-0.173836	0.266196792376593	0.580771432031445
ITGAL	Acute Lymphoblastic Leukemia	0.128277684677778	0.0817423488416362	0.140591037686282			PIR	Acute lymphocytic leukaemia	-0.0864546	0.0767010294335811	0.322711677317088
ITGAM	Acute Lymphoblastic Leukemia	-0.11514	0.199707825830101	0.589230829561373			USO1	Acute lymphocytic leukaemia	0.420474364126523	0.468132995822627	0.534111112951609
ITGAX	Acute Lymphoblastic Leukemia	-0.0835714	0.0497716202904758	0.100558915357949			IFIT3	Acute lymphocytic leukaemia	0.190097649694803	0.525613085072818	0.779072702103688
ITGB1BP1	Acute Lymphoblastic Leukemia	-0.0337225	0.0570746911470251	0.560383379642274			DHX38	Acute lymphocytic leukaemia	0.068231018862049	0.101240082285046	0.548622844817695
ITIH2	Acute Lymphoblastic Leukemia	-0.1192	0.0690763490589323	0.100642509170512			KCNIP1	Acute lymphocytic leukaemia	-0.25293	0.207711881197902	0.277664644122039
ITIH4	Acute Lymphoblastic Leukemia	-0.0577516	0.0377423842344755	0.133137260308069			TOM1L1	Acute lymphocytic leukaemia	-0.157994	0.216456118184999	0.49819135114555
ITK	Acute Lymphoblastic Leukemia	-0.0560471	0.0871161131817132	0.528574108720538			MACROD1	Acute lymphocytic leukaemia	-0.114746	0.113868454507832	0.359844936938925
ITM2B	Acute Lymphoblastic Leukemia	-0.101356	0.0571297572824376	0.0939503066256366			ROCK2	Acute lymphocytic leukaemia	-0.0469683	0.494506952693642	0.939714631581226
ITM2C	Acute Lymphoblastic Leukemia	0.0487526728418816	0.0734625474893697	0.515331587011873			PNKP	Acute lymphocytic leukaemia	-0.135433	0.191996207066584	0.608899933681174
ITPKB-IT1	Acute Lymphoblastic Leukemia	0.021803861740803	0.0726600106632324	0.768860271042101			PDGFC	Acute lymphocytic leukaemia	0.321680205974728	0.288220133370831	0.345726773964962
JAK2	Acute Lymphoblastic Leukemia	-0.063057	0.066269642128821	0.354673508362221			ATP13A1	Acute lymphocytic leukaemia	-0.0130869	0.0893931011841892	0.886834149959434
JAZF1	Acute Lymphoblastic Leukemia	0.0332649196429991	0.0368328175284002	0.373001062222061			PPP2R3A	Acute lymphocytic leukaemia	-0.0423338	0.103909314423646	0.700562467809551
JHDM1D	Acute Lymphoblastic Leukemia	-0.0001956	0.115703606952347	0.998684407129914			CA10	Acute lymphocytic leukaemia	-0.0195893	0.0408543783975818	0.638504969222882
JMJD7	Acute Lymphoblastic Leukemia	-0.122486	0.164520232956177	0.534163732597828			FGFR3	Acute lymphocytic leukaemia	-0.0941551	0.166046100983986	0.595194469823142
JSRP1	Acute Lymphoblastic Leukemia	-0.04105	0.331757571439592	0.921626186931245			ELANE	Acute lymphocytic leukaemia	0.0289836154638632	0.0525585233540053	0.589443558886432
KATNAL1	Acute Lymphoblastic Leukemia	0.0244375294771947	0.157667237064313	0.881200306604422			HSPA6	Acute lymphocytic leukaemia	-0.0714238	0.300558525037298	0.823838453864032
KATNBL1	Acute Lymphoblastic Leukemia	-0.10139	0.0928748535688628	0.324762174224885			CCT7	Acute lymphocytic leukaemia	0.955686195699512	1.02528629180046	0.522357998016498
KB-431C1.3	Acute Lymphoblastic Leukemia	-0.13043	0.0683663508365219	0.074526816589825			INHBB	Acute lymphocytic leukaemia	0.102527777534573	0.16416526790603	0.559662120933075
KB-431C1.4	Acute Lymphoblastic Leukemia	-0.109076	0.0585275381821174	0.0746489676712479			CSNK2A2	Acute lymphocytic leukaemia	0.0328391017413915	0.191799226970035	0.874950982184001
KCNB1	Acute Lymphoblastic Leukemia	0.0209389761475854	0.0953615960079573	0.836952562146211			CSF1R	Acute lymphocytic leukaemia	0.0175296122876829	0.0651843429413485	0.790612813640459
KCNJ10	Acute Lymphoblastic Leukemia	-0.178471	0.123084443259722	0.220665532883545			IL5RA	Acute lymphocytic leukaemia	0.0267708727497144	0.0392971542605476	0.502520435168658
KCNJ15	Acute Lymphoblastic Leukemia	0.00684007307552472	0.0525059153585581	0.897076119839768			ODC1	Acute lymphocytic leukaemia	0.0101142938278369	0.145435975848849	0.946076789611961
KCNK17	Acute Lymphoblastic Leukemia	0.0564523407688563	0.0411849688035223	0.176244998434657			SLC5A8	Acute lymphocytic leukaemia	0.0610876440421482	0.0647574720576325	0.35491237301331
KCNK6	Acute Lymphoblastic Leukemia	-0.0668044	0.14723418006212	0.663756334971421			KIAA0319L	Acute lymphocytic leukaemia	0.063731729109048	0.301598271783685	0.852219540564258
KCNMB4	Acute Lymphoblastic Leukemia	-0.0245555	0.0368713703071153	0.511523979574995			ANXA2	Acute lymphocytic leukaemia	-0.109007	0.087296234666286	0.258285563717275
KCNQ5	Acute Lymphoblastic Leukemia	0.0170454564988811	0.0985814952449686	0.864380011035998			HMGCS2	Acute lymphocytic leukaemia	-0.445162	0.404673785220935	0.386022051057108
KDM1B	Acute Lymphoblastic Leukemia	-0.0566415	0.0797197188577715	0.485205463299572			CLTC	Acute lymphocytic leukaemia	0.330566185056087	0.257818132082415	0.421685546539885
KHNYN	Acute Lymphoblastic Leukemia	-0.0674928	0.0499719443734721	0.187634721831065			FCN2	Acute lymphocytic leukaemia	-0.0981092	0.0627501645329271	0.138785733247837
KHSRP	Acute Lymphoblastic Leukemia	-0.198178	0.293573701256801	0.621983504153012			PAK4	Acute lymphocytic leukaemia	0.0292827892157404	0.397631875683725	0.953201911928227
KIAA0226L	Acute Lymphoblastic Leukemia	0.0614978350956645	0.0690738706167977	0.386486062434215			PRTN3	Acute lymphocytic leukaemia	0.0700033639408355	0.0453457851199568	0.136293223288499
KIAA0247	Acute Lymphoblastic Leukemia	-0.0169266	0.0595477208230059	0.782015132074774			FGF19	Acute lymphocytic leukaemia	-0.0820639	0.168983023515541	0.647759119971652
KIAA1109	Acute Lymphoblastic Leukemia	-0.174214	0.109793691349194	0.210764097118143			SPOP	Acute lymphocytic leukaemia	0.416525291654309	0.268349320173772	0.364354898982938
KIAA1279	Acute Lymphoblastic Leukemia	-0.035265	0.219101356175541	0.87843174585745			SFXN5	Acute lymphocytic leukaemia	0.164734297485587	0.16185534870374	0.415864091065734
KIAA1407	Acute Lymphoblastic Leukemia	-0.19043	0.228585008997546	0.451651554088487			IL12B	Acute lymphocytic leukaemia	-0.0388328	0.0395452559160793	0.340724551937313
KIAA1468	Acute Lymphoblastic Leukemia	-0.130203	0.0470899609868579	0.0119455080139694			INHBA	Acute lymphocytic leukaemia	0.313036652231881	0.168928446429489	0.123061692414176
KIAA1522	Acute Lymphoblastic Leukemia	0.167320978747447	0.107697035140352	0.164219382154332			FRZB	Acute lymphocytic leukaemia	0.0222229233155116	0.0563621318242305	0.698270554833369
KIAA1524	Acute Lymphoblastic Leukemia	-0.0991556	0.0573721741302316	0.107598215264092			IL3RA	Acute lymphocytic leukaemia	0.0827941422081478	0.0578403672018897	0.171552093711179
KIAA1551	Acute Lymphoblastic Leukemia	0.0534659321695918	0.0393083252801879	0.179428158946411			CCL8	Acute lymphocytic leukaemia	0.0538127389515163	0.0647903472269452	0.421210473289794
KIAA1737	Acute Lymphoblastic Leukemia	0.0251983247198469	0.0405393442328724	0.538623390124144			CROT	Acute lymphocytic leukaemia	0.0311781572836919	0.0843262025524249	0.719291318660671
KIAA2013	Acute Lymphoblastic Leukemia	0.0187833329490422	0.0565508203697544	0.742250010824875			APOBEC3G	Acute lymphocytic leukaemia	0.197152342179557	0.155471936811631	0.27355053958813
KIF19	Acute Lymphoblastic Leukemia	0.0280383890526147	0.115722965406629	0.81465210506119			ARHGEF7	Acute lymphocytic leukaemia	0.0272696115662287	0.153616111307673	0.867728465732598
KIF20B	Acute Lymphoblastic Leukemia	-0.0710134	0.0812710998644424	0.400909751756634			NAB1	Acute lymphocytic leukaemia	-0.153717	0.321006415338724	0.679282626584498
KIF24	Acute Lymphoblastic Leukemia	0.0192505690427693	0.09362123124802	0.850248732500795			MCF2L	Acute lymphocytic leukaemia	0.0232022417824876	0.0988180599871951	0.829479254509584
KIF26A	Acute Lymphoblastic Leukemia	0.00684532469024101	0.0601671908210808	0.910834139972275			UGP2	Acute lymphocytic leukaemia	0.0946165874000573	0.155708503356596	0.586329231093579
KIF27	Acute Lymphoblastic Leukemia	-0.0394616	0.0587974961958035	0.515974826742248			FARS2	Acute lymphocytic leukaemia	-0.340669	0.297310994728964	0.334980441946317
KIR3DL2	Acute Lymphoblastic Leukemia	0.0423814926961978	0.0628786385387339	0.512105656590784			SPSB1	Acute lymphocytic leukaemia	0.123393581967882	0.332689980313963	0.746315894382384
KLC1	Acute Lymphoblastic Leukemia	-0.115003	0.0577490133322263	0.0547650045457608			DPY30	Acute lymphocytic leukaemia	0.285888855237117	0.210279364734478	0.232065994952037
KLF10	Acute Lymphoblastic Leukemia	0.28609902801453	0.255971919184384	0.464654438737681			SULT1A3	Acute lymphocytic leukaemia	-0.159633	0.159604895101962	0.363140752138723
KLF12	Acute Lymphoblastic Leukemia	-0.00140849	0.0909325527310918	0.987979685937042			DDX23	Acute lymphocytic leukaemia	0.450788921812657	0.448538481505917	0.371752325101979
KLF9	Acute Lymphoblastic Leukemia	0.144960137540426	0.110709663492549	0.238311962170417			NUDT12	Acute lymphocytic leukaemia	-0.0162662	0.0750169978909562	0.838948576048496
KLHDC7A	Acute Lymphoblastic Leukemia	-0.345998	0.146691698182447	0.0777755089673807			DAPK1	Acute lymphocytic leukaemia	-0.0764582	0.0791809254320637	0.371528321436908
KLHL3	Acute Lymphoblastic Leukemia	0.101837373206641	0.0680201797476479	0.149966778061321			LAP3	Acute lymphocytic leukaemia	0.231135832864044	0.140695225177711	0.161343745423472
KNDC1	Acute Lymphoblastic Leukemia	0.0544810846749106	0.0633100174290877	0.406354392021356			AGAP3	Acute lymphocytic leukaemia	0.102438738344159	0.266174953700144	0.73741589014679
KRIT1	Acute Lymphoblastic Leukemia	0.104321886631772	0.180641376847007	0.62194688038315			KIF3A	Acute lymphocytic leukaemia	-0.0442896	0.179838862545237	0.812535857250662
KRT18P8	Acute Lymphoblastic Leukemia	0.0711498281717226	0.0911601779121887	0.464769391054074			MYOM3	Acute lymphocytic leukaemia	-0.0834734	0.120660710122026	0.519864897563906
KRT8P12	Acute Lymphoblastic Leukemia	-0.0163861	0.100549496114398	0.873257836785296			KPNA6	Acute lymphocytic leukaemia	0.0660326267130663	0.146473057718243	0.730370134102601
KTN1	Acute Lymphoblastic Leukemia	-0.0917563	0.0476070318136873	0.0718802423646083			HSD17B14	Acute lymphocytic leukaemia	0.221955059810635	0.147201798650309	0.206085093172518
L1TD1	Acute Lymphoblastic Leukemia	0.0759568571704204	0.0506234396755264	0.146545271283225			TTL	Acute lymphocytic leukaemia	-0.12396	0.554977987026641	0.843994091231625
L3MBTL2	Acute Lymphoblastic Leukemia	-0.0561101	0.0642458402894788	0.391897420362179			PPFIA1	Acute lymphocytic leukaemia	0.427462915508847	0.405405262934027	0.483143723815157
L3MBTL3	Acute Lymphoblastic Leukemia	0.0455664039431383	0.0338041156379374	0.182019196989463			ARHGEF1	Acute lymphocytic leukaemia	-1.41007	1.30653145951528	0.475748780005681
LA16c-358B7.3	Acute Lymphoblastic Leukemia	-0.291235	0.1423176827731	0.0749290968072813			BARD1	Acute lymphocytic leukaemia	0.569365948722402	0.287134884942847	0.185847481240977
LAX1	Acute Lymphoblastic Leukemia	0.108010476738889	0.0525666448104402	0.0490124689576995			RGS18	Acute lymphocytic leukaemia	-0.315424	0.809268264411838	0.763399348805854
LBH	Acute Lymphoblastic Leukemia	-0.00793312	0.0555337107260613	0.887394792699086			CRYZ	Acute lymphocytic leukaemia	-0.0415909	0.0638903512933914	0.525605358216381
LCA5L	Acute Lymphoblastic Leukemia	0.00848399177691711	0.0639830636138333	0.896068583352397			DDX25	Acute lymphocytic leukaemia	0.198312857002522	0.325357514857481	0.604199078583574
LDLRAD3	Acute Lymphoblastic Leukemia	-0.136944	0.137701360809712	0.365640355585287			NMRAL1	Acute lymphocytic leukaemia	-0.0855321	0.0747250185243599	0.274682131158598
LEMD2	Acute Lymphoblastic Leukemia	0.00892151946369527	0.0869642024327705	0.920135947048238			EIF4G3	Acute lymphocytic leukaemia	0.842971294682557	0.523736503277117	0.353917862647858
LGALS2	Acute Lymphoblastic Leukemia	-0.000934529	0.027805684525742	0.973281737354139			EPB41L1	Acute lymphocytic leukaemia	-0.0658029	0.330002250834277	0.854699006005209
LIG1	Acute Lymphoblastic Leukemia	-0.00252328	0.0617990081775363	0.967816804294806			FBL	Acute lymphocytic leukaemia	0.0259581138884402	0.127237675719563	0.848302827380371
LILRB2	Acute Lymphoblastic Leukemia	-0.0763711	0.0739998724630522	0.318405877267385			DOCK9	Acute lymphocytic leukaemia	0.184568788767763	0.290255427580805	0.63942634618094
LIMS2	Acute Lymphoblastic Leukemia	0.0787323827146983	0.0557533410851898	0.168922389337851			GNMT	Acute lymphocytic leukaemia	0.180878873724117	0.188376893309328	0.438277572182169
LIN7A	Acute Lymphoblastic Leukemia	-0.00833863	0.0588727300018398	0.889250553699925			PAPSS1	Acute lymphocytic leukaemia	-0.00804714	0.107644770251548	0.943997865159592
LIN9	Acute Lymphoblastic Leukemia	0.0410509740200147	0.195543618449958	0.853164266240296			DCP1A	Acute lymphocytic leukaemia	0.0335181020438494	0.104551513285425	0.759393179947704
LINC00092	Acute Lymphoblastic Leukemia	0.0467725795095815	0.220816174162693	0.840613492480863			TNFAIP3	Acute lymphocytic leukaemia	-0.116328	0.0908440945993517	0.328800617000983
LINC00526	Acute Lymphoblastic Leukemia	0.155876483645229	0.120084483281416	0.24192994871362			S100A11	Acute lymphocytic leukaemia	0.0407972104489239	0.166530330034073	0.818524003087113
LINC00565	Acute Lymphoblastic Leukemia	0.0179630378410242	0.0576674800587801	0.757445962151684			DHX58	Acute lymphocytic leukaemia	-0.0656348	0.106776658241865	0.572002883497273
LINC00665	Acute Lymphoblastic Leukemia	0.0138964761827312	0.078020759018783	0.860070003575299			MED4	Acute lymphocytic leukaemia	0.120090708792769	0.146057770716058	0.457141451892578
LINC00683	Acute Lymphoblastic Leukemia	0.113441490715741	0.0717099650557542	0.148120276809177			EDA	Acute lymphocytic leukaemia	0.0729810713079451	0.313415173075348	0.830854829026251
LL22NC03-86G7.1	Acute Lymphoblastic Leukemia	-0.0193355	0.0899941801524073	0.833216061208494			TNFRSF9	Acute lymphocytic leukaemia	0.649722529766247	0.393050927572705	0.346354709137456
LMBR1	Acute Lymphoblastic Leukemia	0.0278715326193594	0.0559772271152095	0.623489267309913			IL17F	Acute lymphocytic leukaemia	0.0747059879143687	0.186503269752579	0.715563333398797
LMCD1	Acute Lymphoblastic Leukemia	0.0696932115834286	0.0654138244299811	0.297287492778309			PIK3C2A	Acute lymphocytic leukaemia	0.041459268251299	0.209907259158052	0.856051814276156
LMF2	Acute Lymphoblastic Leukemia	0.160089204545718	0.311586437814562	0.658534019737247			COPS2	Acute lymphocytic leukaemia	-0.00688805	0.0904994618019605	0.941804782658885
LMNA	Acute Lymphoblastic Leukemia	-0.122385	0.0725237587223118	0.135362747748815			EEA1	Acute lymphocytic leukaemia	0.0601654436839312	0.153330487737545	0.714780697164669
LMTK2	Acute Lymphoblastic Leukemia	0.0377741561972098	0.0758007454318495	0.631657848584222			NCOA2	Acute lymphocytic leukaemia	-0.075025	0.173327618053097	0.678146766285142
LNX2	Acute Lymphoblastic Leukemia	-0.157543	0.10878846195501	0.181495751698452			BDNF	Acute lymphocytic leukaemia	0.000554886837437318	0.119282781858715	0.996389846091805
LOXL3	Acute Lymphoblastic Leukemia	-0.0663127	0.0946229048515118	0.50967221692403			IL1RAP	Acute lymphocytic leukaemia	0.0161155040881862	0.053330346956693	0.769379628889478
LPAR2	Acute Lymphoblastic Leukemia	-0.0890951	0.0534736219827382	0.10544436182028			IL15RA	Acute lymphocytic leukaemia	0.0224297288342276	0.0674867446873956	0.746481063210932
LPCAT2	Acute Lymphoblastic Leukemia	-0.0797704	0.044244771468632	0.0766856173686296			NCF4	Acute lymphocytic leukaemia	-0.131919	0.15394482398937	0.548954416834404
LPIN2	Acute Lymphoblastic Leukemia	0.022793715713615	0.0374726142323097	0.545226025867858			TNFSF11	Acute lymphocytic leukaemia	0.348092201563455	0.225954225452249	0.26333413834057
LRFN2	Acute Lymphoblastic Leukemia	-0.0523376	0.100815790056344	0.610768640895759			MAGI2	Acute lymphocytic leukaemia	0.0473625063027824	0.116499761665638	0.693839101082615
LRP3	Acute Lymphoblastic Leukemia	0.084393509708659	0.0508087071624937	0.10787109204071			PKP2	Acute lymphocytic leukaemia	0.027607050877252	0.120237447431419	0.833163155201192
LRRC32	Acute Lymphoblastic Leukemia	-0.0448231	0.195510148230389	0.856526554915047			CA4	Acute lymphocytic leukaemia	-0.0480848	0.0774453506291982	0.561878868449191
LRRC33	Acute Lymphoblastic Leukemia	0.0284690550812321	0.04209784076966	0.502971592169942			ITSN1	Acute lymphocytic leukaemia	-0.452705	0.646033157120355	0.610880987383274
LRRC37A16P	Acute Lymphoblastic Leukemia	-0.0498522	0.0663770938032222	0.466003916992891			CST4	Acute lymphocytic leukaemia	-0.034804	0.0626299291144051	0.587847132918943
LRRC37A4P	Acute Lymphoblastic Leukemia	-0.0594069	0.0458349422757146	0.202557406705085			IL18R1	Acute lymphocytic leukaemia	-0.0224615	0.0543928180385493	0.684521151342984
LRRC4	Acute Lymphoblastic Leukemia	-0.0407116	0.118940049984667	0.746053784448387			TLN2	Acute lymphocytic leukaemia	0.286815010111008	0.280791775315441	0.493244678284231
LRRC6	Acute Lymphoblastic Leukemia	-0.04873	0.0361495999852129	0.182482140111942			IGFBP6	Acute lymphocytic leukaemia	0.176499968988826	0.207117552284631	0.483882034518719
LRRFIP2	Acute Lymphoblastic Leukemia	0.0028223156402843	0.0623597931563726	0.964151327888061			CBR3	Acute lymphocytic leukaemia	-0.0240559	0.281579911346323	0.934310233267607
LRRIQ3	Acute Lymphoblastic Leukemia	0.0535431882205281	0.0682697438497022	0.443662570982124			FLT3LG	Acute lymphocytic leukaemia	0.441449004673438	0.225933374696677	0.301148259320155
LRWD1	Acute Lymphoblastic Leukemia	0.0385762198429888	0.0401956495163934	0.342966028183422			HBEGF	Acute lymphocytic leukaemia	0.0743229192431712	0.0941005775177681	0.449937995636505
LSM14B	Acute Lymphoblastic Leukemia	-0.264432	0.281910768706691	0.447264272789813			C1QC	Acute lymphocytic leukaemia	0.0420814075555041	0.0772032183765642	0.59493142143568
LSM7	Acute Lymphoblastic Leukemia	-0.0530084	0.0548665586914052	0.342879310761358			CNTFR	Acute lymphocytic leukaemia	0.122022890958849	0.0585954927043111	0.0639330802515317
LSP1	Acute Lymphoblastic Leukemia	-0.125141	0.0982556376933174	0.25879011497901			RAP1GDS1	Acute lymphocytic leukaemia	0.0409836779377411	1.23556094092162	0.976551647425868
LSR	Acute Lymphoblastic Leukemia	0.0232978897969614	0.096497584044982	0.814628879532953			MTHFS	Acute lymphocytic leukaemia	-0.126876	0.0851828781335395	0.186945447058476
LTBR	Acute Lymphoblastic Leukemia	0.0252081665716045	0.0717417718859457	0.72989246427994			RELT	Acute lymphocytic leukaemia	0.0662631628172574	0.207892278813449	0.765874825748528
LY86	Acute Lymphoblastic Leukemia	-0.00361203	0.0317647461365814	0.909827706821158			ADM	Acute lymphocytic leukaemia	0.121204885720057	0.185438547242901	0.631454243273528
LYG1	Acute Lymphoblastic Leukemia	0.0415044807676011	0.0604967553374754	0.498123253351793			S100A4	Acute lymphocytic leukaemia	-0.0551628	0.169439955342506	0.75794045721813
LYRM4	Acute Lymphoblastic Leukemia	0.00744535651373247	0.0455283179305426	0.87074557435883			RNF43	Acute lymphocytic leukaemia	-0.0876794	0.101969451518409	0.429157636721682
MAGI2-AS3	Acute Lymphoblastic Leukemia	0.0207501054815948	0.0704658978846377	0.771767685919979			TNFRSF10D	Acute lymphocytic leukaemia	0.0820722542703144	0.162560353871096	0.663783948309514
MAK16	Acute Lymphoblastic Leukemia	-0.061834	0.204752715440142	0.777707611566742			EFNA2	Acute lymphocytic leukaemia	-1.09291	0.77430447543634	0.39240912826577
MAML3	Acute Lymphoblastic Leukemia	0.0147604811267807	0.061864227266392	0.81362827260737			IFNA10	Acute lymphocytic leukaemia	0.618105843661973	0.515418042339202	0.442484560456543
MAN1B1	Acute Lymphoblastic Leukemia	-0.021708	0.0490828469712372	0.662252113255666			EFNB2	Acute lymphocytic leukaemia	0.0698856309622437	0.101839151910027	0.509855478210603
MAN2B1	Acute Lymphoblastic Leukemia	0.0406465015516317	0.0577023629698953	0.490187663234775			IL1R2	Acute lymphocytic leukaemia	0.0811492456506493	0.0517411090645145	0.134206168211818
MANEA	Acute Lymphoblastic Leukemia	-0.0166792	0.0425528074180046	0.696572356673132			AMIGO2	Acute lymphocytic leukaemia	-0.081388	0.0849933437250495	0.358847676900795
MANSC1	Acute Lymphoblastic Leukemia	-0.0340471	0.139659804823018	0.815518502244125			RXFP1	Acute lymphocytic leukaemia	0.39362032627234	0.203518823639951	0.19277836692917
MAP3K9	Acute Lymphoblastic Leukemia	0.211503123605134	0.0991779810551591	0.0563285033738922			CD93	Acute lymphocytic leukaemia	-0.0869221	0.100232695702697	0.425483580078271
MAP4K5	Acute Lymphoblastic Leukemia	-0.157171	0.253158723409029	0.56190844160453			IL36A	Acute lymphocytic leukaemia	0.102851916663283	0.252450247041587	0.723172837776432
MAP7D1	Acute Lymphoblastic Leukemia	0.0566663167836749	0.0921458156544419	0.54518557520859			ISG15	Acute lymphocytic leukaemia	-0.0157021	0.058937937675969	0.79665517026985
MARC1	Acute Lymphoblastic Leukemia	0.0388971663032537	0.040692595033618	0.34517565442556			EFNA3	Acute lymphocytic leukaemia	-0.00280429	0.17519821834304	0.987995844747565
2025-03-06	Acute Lymphoblastic Leukemia	0.0335020913488564	0.0541681728602725	0.544004892385737			YWHAB	Acute lymphocytic leukaemia	-0.197984	0.217420215228871	0.529764314334901
MARK4	Acute Lymphoblastic Leukemia	0.0026810463484156	0.0582074510445795	0.963697483455266			YWHAE	Acute lymphocytic leukaemia	-0.741078	0.784019969133895	0.517920516342278
MARVELD1	Acute Lymphoblastic Leukemia	-0.0234214	0.174609783498328	0.905575708597254			ANXA5	Acute lymphocytic leukaemia	0.0485598402580307	0.116347372739828	0.71694476212811
MAVS	Acute Lymphoblastic Leukemia	0.0252618216668997	0.0736976406023696	0.74182953472418			SCP2D1	Acute lymphocytic leukaemia	0.0703663609593204	0.0501389989083328	0.188083759390305
MAX	Acute Lymphoblastic Leukemia	0.0665810333679825	0.0772074080689403	0.402063388541359			PRDM1	Acute lymphocytic leukaemia	0.144380215682941	0.246176190367218	0.598755630782674
MBOAT2	Acute Lymphoblastic Leukemia	-0.132508	0.114406910312797	0.330604617401462			ANXA7	Acute lymphocytic leukaemia	-0.11148	0.142135861752468	0.576578983975539
MBTPS1	Acute Lymphoblastic Leukemia	-0.00383769	0.0350366794452569	0.913266339673099			FOXJ2	Acute lymphocytic leukaemia	-0.000964448	0.0816841504229011	0.99132084862144
MCM3AP	Acute Lymphoblastic Leukemia	-0.0419926	0.0489269884928443	0.396269169260156			APBB1	Acute lymphocytic leukaemia	0.249819912728342	0.186708992909004	0.408594391149131
MCM4	Acute Lymphoblastic Leukemia	-0.141465	0.103060529999956	0.228234101351717			RBP7	Acute lymphocytic leukaemia	0.210727030844564	0.126251026289102	0.193687513729118
MCTP1	Acute Lymphoblastic Leukemia	-0.00122685	0.0325981737077509	0.970105281970621			DDX46	Acute lymphocytic leukaemia	0.00380466688862663	0.111835550616938	0.973694558585318
MDM1	Acute Lymphoblastic Leukemia	0.120221326016634	0.0954735276273011	0.221151108439387			BHMT2	Acute lymphocytic leukaemia	0.0114264641550141	0.105029601199254	0.917598019937245
MDS2	Acute Lymphoblastic Leukemia	-0.000729198	0.12732305303604	0.995570659128233			MYL6B	Acute lymphocytic leukaemia	0.0189459965155706	0.127741553219412	0.906263034205754
MED11	Acute Lymphoblastic Leukemia	0.0681098056438034	0.221220825958457	0.78727757352178			MOCS3	Acute lymphocytic leukaemia	-0.0744192	0.077588706339756	0.365570018603283
MED17	Acute Lymphoblastic Leukemia	-0.0901965	0.0910928403701557	0.355079646003631			SNX7	Acute lymphocytic leukaemia	0.0151849333398914	0.196572266056222	0.942135460027483
MED22	Acute Lymphoblastic Leukemia	0.0160446106763593	0.061028808891325	0.794869709208029			DOK2	Acute lymphocytic leukaemia	0.205413100346741	0.414258023495319	0.669124648291204
MED4	Acute Lymphoblastic Leukemia	0.0790007381377132	0.0424902038166808	0.0731627620744066			BLMH	Acute lymphocytic leukaemia	0.0144677989992788	0.181853324102985	0.943833145338966
MEGF9	Acute Lymphoblastic Leukemia	0.00640283532214722	0.0604316242541731	0.916282057491566			PTPN4	Acute lymphocytic leukaemia	0.0478878685294247	0.116128690275438	0.701212154716611
MERTK	Acute Lymphoblastic Leukemia	0.0380224572391935	0.0399617751197944	0.345604937330182			NET1	Acute lymphocytic leukaemia	0.0295355141018429	0.303365736770349	0.931319051279023
METTL13	Acute Lymphoblastic Leukemia	-0.0473732	0.0478895846453664	0.32850369263424			SRXN1	Acute lymphocytic leukaemia	0.0928877024951995	0.0946437696091943	0.371445342963845
METTL22	Acute Lymphoblastic Leukemia	0.038455631858023	0.0400187042038379	0.343787			RAB6B	Acute lymphocytic leukaemia	-0.0143375	0.0889575813744709	0.882200133140179
METTL2B	Acute Lymphoblastic Leukemia	-0.0645804	0.0618640312217528	0.312044281019299			PREP	Acute lymphocytic leukaemia	-0.288293	0.138791831778282	0.173396249153294
MFHAS1	Acute Lymphoblastic Leukemia	-0.0223317	0.0448344295005921	0.620240232335817			RAB14	Acute lymphocytic leukaemia	-0.0464689	0.108011108868394	0.708955932310025
MFN2	Acute Lymphoblastic Leukemia	0.0140898499391977	0.0388760480641684	0.718528272564745			NFATC1	Acute lymphocytic leukaemia	0.0158010639341632	0.105110670602212	0.886382118826689
MFSD4	Acute Lymphoblastic Leukemia	-0.0439276	0.14090067405067	0.784719337202932			RAB5C	Acute lymphocytic leukaemia	0.534142031475289	0.249192741768327	0.165302966175054
MFSD6L	Acute Lymphoblastic Leukemia	-0.277483	0.243417582921064	0.337080673623052			MBD1	Acute lymphocytic leukaemia	0.0746695974343579	0.0644992465717299	0.266363657164227
MGA	Acute Lymphoblastic Leukemia	-0.400769	0.371124299218293	0.359273730931706			HNRNPH1	Acute lymphocytic leukaemia	0.0310091881511801	0.0804291121891544	0.725545834494482
MGAT4B	Acute Lymphoblastic Leukemia	0.0489813185642448	0.0864224633775886	0.586418520911641			PPIL2	Acute lymphocytic leukaemia	-0.0186069	0.0736849898184633	0.80906747538377
MGLL	Acute Lymphoblastic Leukemia	-0.221983	0.127087944237897	0.14112348104587			VPS29	Acute lymphocytic leukaemia	-0.027075	0.0664056391812356	0.694170882099631
MICA	Acute Lymphoblastic Leukemia	0.0498246246483879	0.0415684993887393	0.238099510314755			UBE2E1	Acute lymphocytic leukaemia	0.128746307042332	0.125317262881589	0.491408194515861
MIEN1	Acute Lymphoblastic Leukemia	-0.167414	0.198301414919652	0.553640909652735			DYNLT1	Acute lymphocytic leukaemia	0.0791127820023143	0.146932087484097	0.627664709335858
MIOS	Acute Lymphoblastic Leukemia	-0.191913	0.159811388286287	0.296048331367773			RCVRN	Acute lymphocytic leukaemia	-0.116671	0.222360477346368	0.627530624380993
MIR378I	Acute Lymphoblastic Leukemia	-0.0327907	0.125567474178875	0.837384756560869			TRAPPC3	Acute lymphocytic leukaemia	0.029777467962932	0.139257746180798	0.839125938698049
MIR4420	Acute Lymphoblastic Leukemia	-0.186604	0.120975423604532	0.19781797107245			MSTN	Acute lymphocytic leukaemia	1.09380333098903	0.710690999324645	0.366816807620934
MIS12	Acute Lymphoblastic Leukemia	-0.0744467	0.0431001022212326	0.0951317766921678			FAM210A	Acute lymphocytic leukaemia	-0.0231519	0.226399437365959	0.927878720607596
MIS18BP1	Acute Lymphoblastic Leukemia	0.0075475072800694	0.0859246646710751	0.931583616405057			STAB1	Acute lymphocytic leukaemia	0.134144767531723	0.148858489827984	0.418458895834811
MKKS	Acute Lymphoblastic Leukemia	0.0102557486746948	0.0371720602167019	0.783947004776647			KIAA0040	Acute lymphocytic leukaemia	-0.241915	0.172483097259787	0.295829265165283
MKNK1-AS1	Acute Lymphoblastic Leukemia	-0.00143052	0.0776932514320231	0.98563958211674			NCMAP	Acute lymphocytic leukaemia	0.111621137139974	0.0723601937302176	0.145230399732267
MKNK1	Acute Lymphoblastic Leukemia	0.0397230467400579	0.0555492421040382	0.483244881500089			VOPP1	Acute lymphocytic leukaemia	-0.03642	0.0811955417012709	0.658145436890324
MLKL	Acute Lymphoblastic Leukemia	-0.0314363	0.0435237699740442	0.47443238974755			ZNF526	Acute lymphocytic leukaemia	-1.65836	0.78047806475399	0.280035821310602
MLLT11	Acute Lymphoblastic Leukemia	-0.0255359	0.071652356647556	0.727269369716062			SUMO3	Acute lymphocytic leukaemia	0.178954317054448	0.24341299288355	0.59641244237094
MLLT6	Acute Lymphoblastic Leukemia	-0.0577629	0.147931080658968	0.733853420047294			FBXO3	Acute lymphocytic leukaemia	-0.157017	0.198426806987508	0.511701148005456
MMP14	Acute Lymphoblastic Leukemia	-0.582216	0.51614539375841	0.376439419153284			DUSP16	Acute lymphocytic leukaemia	0.398813496774504	0.255521272375281	0.362753733663848
MNT	Acute Lymphoblastic Leukemia	0.1395672997866	0.194068560104567	0.603084850374935			TMEM185A	Acute lymphocytic leukaemia	-0.0226784	0.0897066559359953	0.806792513872148
MOAP1	Acute Lymphoblastic Leukemia	-0.0253303	0.117047818914134	0.837220872031532			LHCGR	Acute lymphocytic leukaemia	-0.00725543	0.0596226087366632	0.906146296711869
MOB3C	Acute Lymphoblastic Leukemia	0.0405694113951188	0.0631312684283715	0.525519210881869			GSTA4	Acute lymphocytic leukaemia	-0.0418814	0.0727136231693388	0.578746259476562
MON1B	Acute Lymphoblastic Leukemia	0.0655713350331803	0.0377652899242085	0.0877328479693343			DNAJC17	Acute lymphocytic leukaemia	-0.172902	0.13388131347348	0.419459325750874
MORC3	Acute Lymphoblastic Leukemia	-0.0205165	0.0498146952686383	0.684258030450396			MZF1	Acute lymphocytic leukaemia	-0.173602	0.167403467562543	0.339697700112965
MORN1	Acute Lymphoblastic Leukemia	-0.00170059	0.112450389883553	0.988231536575388			RNF8	Acute lymphocytic leukaemia	-0.0955188	0.151384174036396	0.55577436366544
MPC1	Acute Lymphoblastic Leukemia	-0.00301721	0.0492450419855792	0.951538023374837			SKIL	Acute lymphocytic leukaemia	0.192740885781348	0.207839018388908	0.451641612837232
MPC2	Acute Lymphoblastic Leukemia	-0.250836	0.155362484524149	0.204823290384358			CAPN2	Acute lymphocytic leukaemia	0.0346427164156996	0.0683648221471274	0.62791011622085
MPZL1	Acute Lymphoblastic Leukemia	-0.0766231	0.0404297277509262	0.064799038054548			AKT2	Acute lymphocytic leukaemia	-0.0419874	0.183054399544752	0.826199543832701
MRGBP	Acute Lymphoblastic Leukemia	0.0124846881957652	0.0780900580619279	0.878225552718835			PLIN3	Acute lymphocytic leukaemia	0.0276818540852654	0.170028631512953	0.885633414419745
MRPL34	Acute Lymphoblastic Leukemia	0.0176144347267734	0.0626067389943834	0.78043943979291			SEC13	Acute lymphocytic leukaemia	-0.201635	0.0818481856351921	0.0334741645973003
MRPL35	Acute Lymphoblastic Leukemia	0.0224339378951884	0.0578448810697162	0.702955591785116			ZNF276	Acute lymphocytic leukaemia	-0.0673606	0.136734592415018	0.637343652367545
MRPL52	Acute Lymphoblastic Leukemia	0.00938975007279064	0.0539348079513617	0.863193352568001			C8G	Acute lymphocytic leukaemia	0.0228155758908445	0.0708598811316024	0.753502772692115
MRPL55	Acute Lymphoblastic Leukemia	0.089634840216409	0.084331152183421	0.308753565590146			CST6	Acute lymphocytic leukaemia	0.0642499579251898	0.0487992784811587	0.21070702855777
MRPS7	Acute Lymphoblastic Leukemia	0.0148543262059322	0.0444927037420575	0.740370218427938			AZU1	Acute lymphocytic leukaemia	0.277572451505896	0.882660401892871	0.806034116265182
MSANTD4	Acute Lymphoblastic Leukemia	-0.140983	0.0814603575509282	0.107155877654971			CRLF1	Acute lymphocytic leukaemia	0.10936524101355	0.291108187753283	0.771216761856644
MSH3	Acute Lymphoblastic Leukemia	-0.000280208	0.0337495862272954	0.993407364030348			ARHGAP5	Acute lymphocytic leukaemia	0.36610476394496	0.28647018958145	0.291170312545531
MST1	Acute Lymphoblastic Leukemia	-0.0273948	0.0966987454330597	0.788301498740641			IGF2	Acute lymphocytic leukaemia	0.0906865045924874	0.116829160289818	0.463028114957067
MST1P2	Acute Lymphoblastic Leukemia	-0.120516	0.0568837051939589	0.0402264343776985			S100A3	Acute lymphocytic leukaemia	0.337621716483163	0.211002558482682	0.250714197202344
MTERFD2	Acute Lymphoblastic Leukemia	0.104345442340954	0.136990181890352	0.47510356681302			CCDC134	Acute lymphocytic leukaemia	0.109452139676635	0.207589225579941	0.650664318268218
MTHFD1L	Acute Lymphoblastic Leukemia	-0.010875	0.088550930759831	0.913485658220279			REG3A	Acute lymphocytic leukaemia	0.0113381031203778	0.0567306490348498	0.844109261115265
MTHFD2	Acute Lymphoblastic Leukemia	0.0479929528779808	0.116661986677618	0.693093866839178			SCGN	Acute lymphocytic leukaemia	0.214921721977786	0.175270868601522	0.266050892701929
MTHFS	Acute Lymphoblastic Leukemia	0.007153466359955	0.0441794454042428	0.872146547594805			VWC2	Acute lymphocytic leukaemia	0.111772166064163	0.101364469102957	0.293708135952261
MTPN	Acute Lymphoblastic Leukemia	0.124568961758804	0.154622677617613	0.457042063418598			PRC1	Acute lymphocytic leukaemia	0.160538329881213	0.153515488086776	0.485766341041055
MTR	Acute Lymphoblastic Leukemia	-0.0318875	0.18915051830172	0.893676511599125			AGO1	Acute lymphocytic leukaemia	0.64708836044604	1.14092366780262	0.671552746404867
MTRR	Acute Lymphoblastic Leukemia	0.0352562563266942	0.0463568423476501	0.451391621198905			MAD2L1	Acute lymphocytic leukaemia	0.604178010377963	0.361423038557853	0.343201397253876
MUC20	Acute Lymphoblastic Leukemia	0.0192316717294617	0.0247811968296385	0.439868174630704			CUTC	Acute lymphocytic leukaemia	0.48409261082593	0.301893572160496	0.354986760892515
MVB12A	Acute Lymphoblastic Leukemia	0.0946572959414549	0.0540560609816644	0.0938622288952753			TXNL4B	Acute lymphocytic leukaemia	0.119010148931537	0.103182420975456	0.300886142544952
MVK	Acute Lymphoblastic Leukemia	0.251001311313346	0.220997123996738	0.373828105181223			S100A10	Acute lymphocytic leukaemia	0.226233724422723	0.135361381074307	0.236615985652695
MX1	Acute Lymphoblastic Leukemia	-0.0120793	0.0437271417601458	0.783820824275697			CRADD	Acute lymphocytic leukaemia	-0.0480732	0.280332415718814	0.89187997391578
MYBPC3	Acute Lymphoblastic Leukemia	0.000321890602433684	0.0893379089210479	0.99714453036747			FTL	Acute lymphocytic leukaemia	-0.0561652	0.172708662086388	0.761327293749398
MYBPH	Acute Lymphoblastic Leukemia	-0.124151	0.0507854629832102	0.0213105436346016			GBP1	Acute lymphocytic leukaemia	0.0138418569750251	0.0505207929931303	0.789174033127681
MYCBPAP	Acute Lymphoblastic Leukemia	0.027009981755634	0.0609316337519822	0.662842630621997			RBBP4	Acute lymphocytic leukaemia	0.511232959850464	0.370638729024676	0.301777554693892
MYCL1	Acute Lymphoblastic Leukemia	-0.0312676	0.143699472611327	0.84792974846686			SDF2	Acute lymphocytic leukaemia	-0.00475568	0.0952111033050421	0.960822266007584
MYH10	Acute Lymphoblastic Leukemia	-0.135628	0.0980904398473331	0.300908704312381			KNG1	Acute lymphocytic leukaemia	0.0107898026154109	0.0795262736120295	0.897370566185576
MYO19	Acute Lymphoblastic Leukemia	0.0693672896055101	0.257150259985948	0.804840641812153			IFNG	Acute lymphocytic leukaemia	0.372601967847161	0.366071449087534	0.494371871304858
MYO1E	Acute Lymphoblastic Leukemia	-0.0635608	0.143726108596582	0.681177781871176			SCG5	Acute lymphocytic leukaemia	-0.0561982	0.114096914362623	0.635564221207879
MYO5A	Acute Lymphoblastic Leukemia	-0.0145686	0.054047808306641	0.790412351158077			APOA5	Acute lymphocytic leukaemia	0.0362618464550657	0.0538200336934396	0.510080185305092
MYO5B	Acute Lymphoblastic Leukemia	-0.0312027	0.0901599351701433	0.73645211245826			APOC1	Acute lymphocytic leukaemia	-0.0543386	0.0818982015587663	0.531667437766933
MYO7A	Acute Lymphoblastic Leukemia	0.0366809668014177	0.10578454750408	0.737722317678741			BPIFB1	Acute lymphocytic leukaemia	0.0129536598063465	0.0709697175707652	0.856843206497677
MYPOP	Acute Lymphoblastic Leukemia	-0.179266	0.248303424848638	0.522502299755396			BMPER	Acute lymphocytic leukaemia	0.0506480194334472	0.372771698820867	0.914029709907355
N6AMT2	Acute Lymphoblastic Leukemia	-0.61073	0.867711535642998	0.609562175639244			BOLA1	Acute lymphocytic leukaemia	-0.0712702	0.0646903684788083	0.289167412105229
NAIP	Acute Lymphoblastic Leukemia	-0.154462	0.131135379319926	0.291847489749925			BRD2	Acute lymphocytic leukaemia	0.142489202246751	0.23695637834886	0.608699428288415
NANOS1	Acute Lymphoblastic Leukemia	-0.092685	0.0589754925504059	0.133458789682869			GKN1	Acute lymphocytic leukaemia	0.444081233260904	0.280235774049461	0.35837576388723
NAPG	Acute Lymphoblastic Leukemia	-0.0245408	0.0806173387608832	0.763960106487155			CPB1	Acute lymphocytic leukaemia	0.0195421309060388	0.0420888833842237	0.646990277057024
NAPSA	Acute Lymphoblastic Leukemia	0.10010974378443	0.191154449978665	0.628155022668685			CTSE	Acute lymphocytic leukaemia	0.0368047071911771	0.050995728985917	0.486998172097772
NAPSB	Acute Lymphoblastic Leukemia	0.0168023337812215	0.0300357826993095	0.577526473160249			EDN3	Acute lymphocytic leukaemia	0.24940221001149	0.252414962021514	0.427271277094645
NAT6	Acute Lymphoblastic Leukemia	-0.275054	0.141686165535715	0.0881703327248655			KL	Acute lymphocytic leukaemia	0.0013203125506987	0.0393948220913741	0.973510544257692
NBPF1	Acute Lymphoblastic Leukemia	-0.088245	0.0516385154252858	0.0993821964178086			FABP2	Acute lymphocytic leukaemia	0.102037679197451	0.0609194546625189	0.124880976681111
NBPF2P	Acute Lymphoblastic Leukemia	0.0138162175912064	0.0454650481187185	0.763461160611089			FABP4	Acute lymphocytic leukaemia	-0.0367935	0.305631953889866	0.923727645868372
NCAPD2	Acute Lymphoblastic Leukemia	-0.0368392	0.0397461855087006	0.360728284675881			NRP2	Acute lymphocytic leukaemia	-0.035505	0.0710826336032472	0.623169832034242
NCEH1	Acute Lymphoblastic Leukemia	-0.05002	0.0658078097926858	0.461872258342077			FCGR3A	Acute lymphocytic leukaemia	0.0268092973878248	0.0439353438819911	0.550863575885637
NCF1C	Acute Lymphoblastic Leukemia	-0.178621	0.086854959846336	0.0588666969335075			GAL	Acute lymphocytic leukaemia	0.162718813067513	0.241680387579468	0.548995349991611
NCKAP1L	Acute Lymphoblastic Leukemia	-0.0329764	0.0970968373770631	0.745712877148919			GAS6	Acute lymphocytic leukaemia	-0.045363	0.0650684141710772	0.49798206712157
NDUFAF3	Acute Lymphoblastic Leukemia	0.00529613848356627	0.177182376556764	0.978031414864502			UNC5B	Acute lymphocytic leukaemia	0.0540911825954358	0.0905263808457152	0.566685675387928
NDUFAF5	Acute Lymphoblastic Leukemia	-0.09041	0.0437123449584824	0.0495514057289443			GSTM1	Acute lymphocytic leukaemia	0.0725436060692501	0.074821096596385	0.349959357631402
NDUFC1	Acute Lymphoblastic Leukemia	0.00294255513995075	0.123113154992812	0.982432315920857			IFNA4	Acute lymphocytic leukaemia	-0.0941629	0.241203309206445	0.763054587513939
NDUFS2	Acute Lymphoblastic Leukemia	0.0160589709047016	0.0930458861175013	0.865630245936205			LCAT	Acute lymphocytic leukaemia	-0.262167	0.43480245716567	0.589070234453094
NEDD9	Acute Lymphoblastic Leukemia	-0.0389944	0.0884017716635515	0.672440254457755			LDHA	Acute lymphocytic leukaemia	-0.0426542	0.0970272362011312	0.682926357539198
NEFH	Acute Lymphoblastic Leukemia	-0.0250229	0.0581007409361303	0.671546658963921			LYG2	Acute lymphocytic leukaemia	0.000984862379487444	0.243678400814608	0.996968774136477
NELFCD	Acute Lymphoblastic Leukemia	-0.0256192	0.0414468751641973	0.541320107158792			MAPK10	Acute lymphocytic leukaemia	-0.170279	0.254019665576896	0.550630612336939
NELL2	Acute Lymphoblastic Leukemia	-0.059098	0.0425029983630899	0.175750396154799			MMP20	Acute lymphocytic leukaemia	0.0469071720490227	0.12809965922042	0.72921623867213
NEO1	Acute Lymphoblastic Leukemia	0.0669527652033485	0.0536302157044069	0.219937431253227			NEU1	Acute lymphocytic leukaemia	0.101444757276553	0.130275405764103	0.47138619977747
NFRKB	Acute Lymphoblastic Leukemia	0.0244136528609697	0.074716689313255	0.747845826675429			LOXL3	Acute lymphocytic leukaemia	0.0601529610958098	0.0872261742245003	0.500963137035452
NFYA	Acute Lymphoblastic Leukemia	0.0280385740079253	0.0632484549244163	0.668007500030393			OPTC	Acute lymphocytic leukaemia	0.178431928281921	0.213529410324879	0.464685307022086
NHSL1	Acute Lymphoblastic Leukemia	-0.178582	0.194375851751425	0.410216591927606			OTC	Acute lymphocytic leukaemia	-0.0424301	0.109323725720931	0.708055288518629
NINJ1	Acute Lymphoblastic Leukemia	0.00150591491310557	0.0436068648149394	0.97261502050304			OTOR	Acute lymphocytic leukaemia	-0.0628377	0.120286062909813	0.620108892272432
NIPA1	Acute Lymphoblastic Leukemia	0.133849510755859	0.0897782334285876	0.170181346683867			PNP	Acute lymphocytic leukaemia	-0.150751	0.160658014423542	0.520245350490397
NIPAL3	Acute Lymphoblastic Leukemia	-0.0697218	0.0655736157406199	0.304482610509709			PCSK2	Acute lymphocytic leukaemia	0.00665051362770794	0.240817724436724	0.979702495953911
NIPSNAP3A	Acute Lymphoblastic Leukemia	-0.0323661	0.0500477730155745	0.521611879834678			GM2A	Acute lymphocytic leukaemia	0.0377894682536858	0.132497677989435	0.789642844053389
NLRC4	Acute Lymphoblastic Leukemia	-0.0932551	0.0784311169217143	0.24908572478131			SERPINB4	Acute lymphocytic leukaemia	0.0790726838308287	0.0853283135250668	0.406539967083631
NLRP2	Acute Lymphoblastic Leukemia	0.103988977354238	0.0586474539084916	0.0867132128924749			NRG1	Acute lymphocytic leukaemia	0.0785668408243993	0.104494893160935	0.485992518284065
NMB	Acute Lymphoblastic Leukemia	0.0604258405201042	0.0457807416965972	0.197951585505784			SORD	Acute lymphocytic leukaemia	-0.24473	0.164680445898167	0.197398002467396
NME8	Acute Lymphoblastic Leukemia	0.0164663509530612	0.0476290218372469	0.731887664013834			TIMD4	Acute lymphocytic leukaemia	-0.0643285	0.0324441554137528	0.055771027907351
NNT	Acute Lymphoblastic Leukemia	-0.0334963	0.0452819113766944	0.463306213382231			NT5E	Acute lymphocytic leukaemia	-0.0311237	0.0471659916716743	0.518174487662232
NOD2	Acute Lymphoblastic Leukemia	-0.0477432	0.0277644175468433	0.0899911714245071			AMBP	Acute lymphocytic leukaemia	0.104327939270321	0.146807423903427	0.500289521821078
NOL9	Acute Lymphoblastic Leukemia	0.0393160421263812	0.0978248380114861	0.701680690718818			ADAM15	Acute lymphocytic leukaemia	0.237893788829386	0.143740661681547	0.196494949175643
NOM1	Acute Lymphoblastic Leukemia	-0.0360176	0.0666939598860638	0.596604772208968			DPP4	Acute lymphocytic leukaemia	-1.64197	0.819123815475544	0.294589356192646
NPC2	Acute Lymphoblastic Leukemia	0.0363541991392679	0.0706238130308583	0.613759419331979			CD8A	Acute lymphocytic leukaemia	-0.0389818	0.0455755649897173	0.40582828784694
NRBP1	Acute Lymphoblastic Leukemia	0.0940800779205746	0.0739970236824653	0.218929497435102			COL9A1	Acute lymphocytic leukaemia	-0.219794	1.14614598471336	0.879380966232169
NRDE2	Acute Lymphoblastic Leukemia	-0.0214132	0.0751294642701698	0.778884299923328			CTHRC1	Acute lymphocytic leukaemia	0.0869026643688303	0.143538053451845	0.561669332469907
NRG1	Acute Lymphoblastic Leukemia	0.00830824313361301	0.0409744791601238	0.83989765195282			CFHR1	Acute lymphocytic leukaemia	-0.0616419	0.0514230265879557	0.246180194860455
NRP1	Acute Lymphoblastic Leukemia	-0.0613697	0.0370877620542062	0.107759582795323			HEXB	Acute lymphocytic leukaemia	0.00637442603240488	0.0481404952722144	0.89576155542543
NSFL1C	Acute Lymphoblastic Leukemia	0.00359506083489327	0.0316277570982756	0.909868334450744			PNLIPRP2	Acute lymphocytic leukaemia	-0.11269	0.088911690971991	0.231172055401084
NSUN5P2	Acute Lymphoblastic Leukemia	0.00389491245118256	0.0549295853080007	0.943958217945923			LRP11	Acute lymphocytic leukaemia	0.00484639246128612	0.0651982278760673	0.941727513390919
NSUN7	Acute Lymphoblastic Leukemia	-0.0129301	0.0519455503713576	0.804766563907491			PLTP	Acute lymphocytic leukaemia	-0.0685912	0.0600616707413891	0.270252032011208
NT5DC2	Acute Lymphoblastic Leukemia	-0.0530796	0.0458745952694094	0.253636042082841			REG3G	Acute lymphocytic leukaemia	0.0375701184386263	0.0353447929017884	0.298378932556636
NTPCR	Acute Lymphoblastic Leukemia	-0.00475927	0.0221627239928805	0.830543738118771			VNN2	Acute lymphocytic leukaemia	0.051945129382466	0.0418539073869815	0.231420627432582
NUCB1	Acute Lymphoblastic Leukemia	0.0440355162517312	0.0490922617288638	0.378278644153071			CAMP	Acute lymphocytic leukaemia	0.0481373921212337	0.0319513386018696	0.142040570250884
NUDT6	Acute Lymphoblastic Leukemia	0.280980019213348	0.115886854074115	0.0415503941359301			A2ML1	Acute lymphocytic leukaemia	-0.097849	0.106442572485078	0.455000460359769
NUFIP2	Acute Lymphoblastic Leukemia	-0.0571434	0.0576645481389319	0.334839078460149			AGRN	Acute lymphocytic leukaemia	0.0806985760688542	0.0566756185161605	0.174953967117733
NUP85	Acute Lymphoblastic Leukemia	-0.0193376	0.0473886004812643	0.685119082536149			AOC1	Acute lymphocytic leukaemia	0.00619703145397317	0.0548869187270019	0.912339933882596
NUP88	Acute Lymphoblastic Leukemia	0.03707551248584	0.0607181663948713	0.545398597082248			CES1	Acute lymphocytic leukaemia	-0.155366	0.191280547332443	0.447673414413414
NUPL2	Acute Lymphoblastic Leukemia	0.0813187191241151	0.0476234043520428	0.0958815419037342			CD248	Acute lymphocytic leukaemia	0.0829935997479706	0.0686635650937944	0.243322495877301
OAS1	Acute Lymphoblastic Leukemia	-0.000769913	0.0392794019818061	0.984421765241236			FGFBP1	Acute lymphocytic leukaemia	0.0497876167839257	0.124963879382707	0.704114388353311
OASL	Acute Lymphoblastic Leukemia	0.0632448916415363	0.0687748372223047	0.363164187085891			FOLR3	Acute lymphocytic leukaemia	-0.0594465	0.0647503497590025	0.370081412204917
OBSCN	Acute Lymphoblastic Leukemia	-0.0718843	0.108981267149928	0.523078716566404			HS3ST1	Acute lymphocytic leukaemia	0.219420146095746	0.133127265292685	0.347179496048646
OCEL1	Acute Lymphoblastic Leukemia	-0.0135936	0.0456229525291135	0.767498452798035			ATRN	Acute lymphocytic leukaemia	0.159266035848521	0.071283990012536	0.0559251994922456
ODC1	Acute Lymphoblastic Leukemia	-0.1582	0.411195552798004	0.737494066935281			LEFTY2	Acute lymphocytic leukaemia	0.033416241529802	0.0904054547771829	0.720208354718879
ODF3B	Acute Lymphoblastic Leukemia	-0.0449819	0.058952980521245	0.453559914234842			LEFTY2	Acute lymphocytic leukaemia	-0.05198	0.0548377263478995	0.356467695136384
OPRL1	Acute Lymphoblastic Leukemia	0.0284729279706678	0.0452720689918441	0.533725085032457			BIRC7	Acute lymphocytic leukaemia	-0.0355048	0.191809076907043	0.870218162030933
OR13A1	Acute Lymphoblastic Leukemia	0.0342067342685117	0.0536011170205107	0.533662076296095			LRP12	Acute lymphocytic leukaemia	0.451288058699943	0.688080491936215	0.630450275715745
OR2A9P	Acute Lymphoblastic Leukemia	0.0116964704839411	0.0665849039194739	0.862325463564462			NAGLU	Acute lymphocytic leukaemia	-0.0794264	0.0545746043468015	0.155951167855892
OR7D2	Acute Lymphoblastic Leukemia	0.0485234057366814	0.0276100417653063	0.0866882557430968			NPTXR	Acute lymphocytic leukaemia	0.0386000008784693	0.0672819305940374	0.580218958531143
OR7E14P	Acute Lymphoblastic Leukemia	-0.00784786	0.0482230667689964	0.871851187613526			PRSS8	Acute lymphocytic leukaemia	-0.0253688	0.384938186458831	0.951600701639508
ORC5	Acute Lymphoblastic Leukemia	0.103496802144497	0.723924616157583	0.909597447382053			BCHE	Acute lymphocytic leukaemia	0.0917110367614015	0.0526725185129247	0.0997216309409862
OSBPL3	Acute Lymphoblastic Leukemia	0.00431155769512667	0.0451176431563618	0.924463944363359			SAA1	Acute lymphocytic leukaemia	0.0496334708655388	0.0588366865893111	0.415403630751549
OSBPL8	Acute Lymphoblastic Leukemia	0.0454023760501937	0.0507560634981371	0.381181340639516			SAA4	Acute lymphocytic leukaemia	0.0346544414398178	0.076069889559846	0.662500887704163
OSGIN1	Acute Lymphoblastic Leukemia	-0.0456787	0.0529870919933996	0.39652919666197			CLSTN1	Acute lymphocytic leukaemia	0.190170880086129	0.0916593208331519	0.0926773511057024
OTOF	Acute Lymphoblastic Leukemia	-0.0971832	0.0750471249960739	0.214911460960171			GLIPR2	Acute lymphocytic leukaemia	0.0559870293005772	0.0952112312069843	0.588108586003694
P2RX4	Acute Lymphoblastic Leukemia	-0.00246711	0.0365330775021706	0.946413305608755			ALAD	Acute lymphocytic leukaemia	0.20729082980375	0.248577249920645	0.465519174454872
P2RX7	Acute Lymphoblastic Leukemia	-0.0277169	0.0511718863131747	0.594047371710874			ADH1C	Acute lymphocytic leukaemia	0.194793674288825	0.169764912497783	0.369942230679185
PADI4	Acute Lymphoblastic Leukemia	0.0301815001048094	0.049786270252159	0.549251449670933			GSS	Acute lymphocytic leukaemia	-0.00617293	0.14549811953181	0.968824764006701
PAICS	Acute Lymphoblastic Leukemia	0.0373439441463388	0.160485376587785	0.854452621043356			EPHB4	Acute lymphocytic leukaemia	0.133598843817492	0.0498970705440645	0.0231924855559464
PALD1	Acute Lymphoblastic Leukemia	-0.198763	0.125948666556616	0.212644756258121			MSR1	Acute lymphocytic leukaemia	-0.03423	0.0572153357903847	0.55858862438552
PAM16	Acute Lymphoblastic Leukemia	0.066635175639791	0.0616794216160909	0.301222540648955			PRSS27	Acute lymphocytic leukaemia	0.00587458339429837	0.0489978609736338	0.906059152508774
PAN3-AS1	Acute Lymphoblastic Leukemia	0.0627634784971596	0.127882854237149	0.657233777228108			SLITRK1	Acute lymphocytic leukaemia	0.286743272173118	0.331493199104292	0.47821476148467
PAN3	Acute Lymphoblastic Leukemia	-0.0740456	0.0978142581423201	0.491190839588988			VIM	Acute lymphocytic leukaemia	-0.0576214	0.15795948181823	0.733739133367811
PAPD4	Acute Lymphoblastic Leukemia	0.173079506682077	0.161986666169735	0.363643927120246			KLK14	Acute lymphocytic leukaemia	-0.0390893	0.0597971735663352	0.526735275543587
PARD6A	Acute Lymphoblastic Leukemia	-0.0449758	0.273290595256497	0.896161301374832			PPP3R1	Acute lymphocytic leukaemia	0.43301120446099	0.262197163305948	0.173986614153831
PARP16	Acute Lymphoblastic Leukemia	-0.140352	0.076883166958368	0.0803928123327279			PHGDH	Acute lymphocytic leukaemia	0.0540448732741975	0.0510746742911803	0.312669123811914
PASK	Acute Lymphoblastic Leukemia	0.0500766506026204	0.046008498752186	0.285371983795074			ACHE	Acute lymphocytic leukaemia	0.948187243026401	1.01751207337488	0.522442534072414
PBX4	Acute Lymphoblastic Leukemia	-0.0742415	0.218198227218367	0.791213729927224			AMY2B	Acute lymphocytic leukaemia	-0.0526985	0.0467226060777626	0.27340336150978
PCCA	Acute Lymphoblastic Leukemia	0.160540242959175	0.0830222487477014	0.0667420765086405			ENPEP	Acute lymphocytic leukaemia	-0.0830282	0.118749555646871	0.510616214983391
PCED1B	Acute Lymphoblastic Leukemia	-0.0363425	0.0557523772712822	0.517963731148758			ANTXR2	Acute lymphocytic leukaemia	0.0205614355245123	0.0773501098270125	0.795291811334454
PCGF2	Acute Lymphoblastic Leukemia	0.031028801402023	0.0681031059947071	0.656801297180916			TCN2	Acute lymphocytic leukaemia	0.0643595373885773	0.0932243090471891	0.504265921673678
PCK2	Acute Lymphoblastic Leukemia	-0.0033089	0.0485105975253378	0.946103416717464			GUSB	Acute lymphocytic leukaemia	-0.056676	0.0446967500969272	0.214880201541774
PCMT1	Acute Lymphoblastic Leukemia	-0.10864	0.0625378722635675	0.0985384380160739			MUC16	Acute lymphocytic leukaemia	0.0306062522525394	0.0585311893237976	0.610559548639607
PCNX	Acute Lymphoblastic Leukemia	0.027690266732383	0.0503631901684816	0.587327375777819			CNN1	Acute lymphocytic leukaemia	-0.0636423	0.074994368366634	0.408606212236609
PCNXL3	Acute Lymphoblastic Leukemia	0.0973677480670143	0.131419086350308	0.482864719372481			CD247	Acute lymphocytic leukaemia	0.0811744337832192	0.208369475813543	0.763506878917174
PDCD5	Acute Lymphoblastic Leukemia	-0.0087095	0.0510460396253349	0.865477583470862			COL2A1	Acute lymphocytic leukaemia	0.109915085808055	0.10976704808814	0.35531620627435
PDGFB	Acute Lymphoblastic Leukemia	0.0516470810252338	0.0569250673963897	0.375060223873872			CR2	Acute lymphocytic leukaemia	-0.071963	0.0613813444614459	0.250580873837704
PDK4	Acute Lymphoblastic Leukemia	-0.00893686	0.0976966803098272	0.929363759230915			NCAN	Acute lymphocytic leukaemia	0.00831613332650492	0.0555662979000444	0.883166367713874
PDLIM1	Acute Lymphoblastic Leukemia	0.0752710548956385	0.0775159162371285	0.344397041346109			CCNA2	Acute lymphocytic leukaemia	-0.0904577	0.17956198937651	0.702916211474037
PELO	Acute Lymphoblastic Leukemia	-0.0197856	0.0385805084048189	0.611032487779852			RNASE3	Acute lymphocytic leukaemia	0.0352273659101123	0.0488101712737822	0.480275447261919
PET112	Acute Lymphoblastic Leukemia	-0.0159033	0.0672446156046564	0.814830845141709			ENPP6	Acute lymphocytic leukaemia	0.276522929863891	0.182469006029379	0.226907544255367
PFKP	Acute Lymphoblastic Leukemia	-0.0627672	0.0353206078014431	0.0805422419418667			EPHA7	Acute lymphocytic leukaemia	0.216488723793792	0.125269153402896	0.226095610677495
PGAP1	Acute Lymphoblastic Leukemia	-0.0142526	0.106845313611206	0.906092351661702			FCN1	Acute lymphocytic leukaemia	0.107756491789356	0.0688207367119228	0.145701674240403
PGK1P2	Acute Lymphoblastic Leukemia	-0.161148	0.160820301582762	0.373028142709344			FCRLB	Acute lymphocytic leukaemia	0.0293952471453018	0.0923633962960262	0.766214043740762
PGLS	Acute Lymphoblastic Leukemia	-0.0272299	0.111491783115001	0.814054687171982			CFHR2	Acute lymphocytic leukaemia	-0.0953794	0.0728904093302508	0.208108413692313
PGLYRP1	Acute Lymphoblastic Leukemia	0.00648475019051245	0.0592254902421283	0.91402328412806			FBLN5	Acute lymphocytic leukaemia	0.322105487482493	0.201281026877605	0.170434304883893
PGLYRP2	Acute Lymphoblastic Leukemia	0.167527054051001	0.10546614707804	0.156209303331282			FOLR2	Acute lymphocytic leukaemia	-0.0220407	0.0745440637187476	0.772149518783378
PGP	Acute Lymphoblastic Leukemia	0.0980229950499163	0.146285497602186	0.539505034226494			GC	Acute lymphocytic leukaemia	0.180421573400992	0.136827029247543	0.257729249742143
PHACTR4	Acute Lymphoblastic Leukemia	0.062289544274143	0.0800248983594293	0.452765149830156			HTRA1	Acute lymphocytic leukaemia	0.0765441020043778	0.127549339858612	0.570385317783287
PHB	Acute Lymphoblastic Leukemia	-0.183658	0.183503582251849	0.390654026382168			IL6R	Acute lymphocytic leukaemia	-0.0583588	0.0778603305940161	0.466884875452198
PHF11	Acute Lymphoblastic Leukemia	-0.0234688	0.0472152420522642	0.621937899395651			MAPK9	Acute lymphocytic leukaemia	-0.0417091	0.106522242382262	0.721543455277437
PHF14	Acute Lymphoblastic Leukemia	0.111325713498542	0.0816187416308187	0.214810273353609			KRT19	Acute lymphocytic leukaemia	0.00050262476548703	0.0926626789444944	0.995804925247259
PHF2	Acute Lymphoblastic Leukemia	-0.0376891	0.134386711544054	0.787237825282795			PKLR	Acute lymphocytic leukaemia	0.0495111926953366	0.0999601805016474	0.654390363668474
PHKG2	Acute Lymphoblastic Leukemia	-0.0355813	0.339637374705276	0.933548393948659			LAP3	Acute lymphocytic leukaemia	0.243510386764266	0.190702098464901	0.270720749330887
PHLDB3	Acute Lymphoblastic Leukemia	0.0715225117245217	0.045482161475693	0.128397059155756			PNLIP	Acute lymphocytic leukaemia	0.003451128036062	0.038508131832725	0.929364449589128
PHOSPHO2	Acute Lymphoblastic Leukemia	-0.0170598	0.0583240232437838	0.771631521969991			LILRA2	Acute lymphocytic leukaemia	-0.0708337	0.0507732041313185	0.188269647639312
PHPT1	Acute Lymphoblastic Leukemia	-0.00507905	0.0649960950704005	0.938746453287556			LILRB3	Acute lymphocytic leukaemia	-0.0717899	0.0776398851172299	0.390819077581936
PIEZO1	Acute Lymphoblastic Leukemia	0.0196758919900912	0.0373868078610558	0.601752791770609			NLGN1	Acute lymphocytic leukaemia	-0.0606258	0.109106313814103	0.593639017245388
PIGL	Acute Lymphoblastic Leukemia	-0.080833	0.0946812609045547	0.408706545120753			OPCML	Acute lymphocytic leukaemia	-0.0151501	0.0717755005340726	0.838841487273775
PIGZ	Acute Lymphoblastic Leukemia	-0.0511388	0.051896485676523	0.332577965901798			PDCD1	Acute lymphocytic leukaemia	0.239520699404874	0.18570152405588	0.419850996781779
PIK3IP1	Acute Lymphoblastic Leukemia	-0.0431543	0.0359328287428806	0.234817887826538			HSPG2	Acute lymphocytic leukaemia	0.0338243017158611	0.0529440476023986	0.534912575319044
PINK1-AS	Acute Lymphoblastic Leukemia	0.012503295282482	0.106489870644669	0.91036456652534			RBP4	Acute lymphocytic leukaemia	-0.312503	0.129587004390497	0.0734330973002537
PINK1	Acute Lymphoblastic Leukemia	0.011895911205202	0.101957315662112	0.909993150075677			SLIT1	Acute lymphocytic leukaemia	0.110091834993463	0.37809345932446	0.819618829473904
PIP4K2A	Acute Lymphoblastic Leukemia	0.258820694394039	0.325891217443875	0.572706941884126			SMOC2	Acute lymphocytic leukaemia	-0.036917	0.0923791662974406	0.701345715297261
PISD	Acute Lymphoblastic Leukemia	-0.0158034	0.0357443104457508	0.659472868549819			SORCS1	Acute lymphocytic leukaemia	-0.114122	0.174795642860408	0.560399044080258
PITPNC1	Acute Lymphoblastic Leukemia	-0.000666871	0.0828662331768936	0.993685100041571			TAGLN	Acute lymphocytic leukaemia	-0.0348872	0.218157524371753	0.899048011396854
PITRM1	Acute Lymphoblastic Leukemia	-0.0597164	0.0439270235723302	0.182700458417916			TMEFF1	Acute lymphocytic leukaemia	0.343985076289341	0.219291252026131	0.257283834964763
PKD1P6	Acute Lymphoblastic Leukemia	-0.0799271	0.121544914309167	0.546716678598572			BTD	Acute lymphocytic leukaemia	-0.11578	0.0729632291280852	0.140859856371736
PKDREJ	Acute Lymphoblastic Leukemia	-1.1666	2.37375651612917	0.709197514437449			COL10A1	Acute lymphocytic leukaemia	0.0598083186754176	0.069048173174078	0.411613264042198
PKHD1L1	Acute Lymphoblastic Leukemia	0.106716357651987	0.135404024623163	0.488155522903251			BMP4	Acute lymphocytic leukaemia	0.0673266621098962	0.0972363953635899	0.506155347280361
PLA2G4B	Acute Lymphoblastic Leukemia	0.0381164094518808	0.0536030614185334	0.481743029166772			BMP8B	Acute lymphocytic leukaemia	-0.055253	0.16184411649108	0.746684633158962
PLD6	Acute Lymphoblastic Leukemia	-0.0520115	0.0462242868885834	0.270057565394709			BRAF	Acute lymphocytic leukaemia	1.03405734833612	0.576730622210351	0.170880261352723
PLEC	Acute Lymphoblastic Leukemia	0.11806179684121	0.0952049834040388	0.2353287003042			C1QL2	Acute lymphocytic leukaemia	-0.0644337	0.166320133221003	0.711823873628446
PLEKHA3	Acute Lymphoblastic Leukemia	0.149703983290487	0.133148746663567	0.323777181052206			CD79A	Acute lymphocytic leukaemia	-0.278901	0.689292408965513	0.755231145541913
PLEKHB1	Acute Lymphoblastic Leukemia	-0.00964356	0.0727007645076876	0.895867030637451			CEBPB	Acute lymphocytic leukaemia	-0.122431	0.132843652441762	0.387387987002034
PLEKHG5	Acute Lymphoblastic Leukemia	-0.0309685	0.089775677899684	0.741899203376643			DKK2	Acute lymphocytic leukaemia	-0.0196208	0.0681812619861932	0.778055844543432
PLGLB1	Acute Lymphoblastic Leukemia	0.0116847936498334	0.0616788834222893	0.851652984516434			INHBC	Acute lymphocytic leukaemia	0.0487486985671372	0.0737242300802868	0.517873879719856
PLLP	Acute Lymphoblastic Leukemia	-0.237368	0.15463475160894	0.185369194289904			LMAN1	Acute lymphocytic leukaemia	0.208590664021863	0.199020155466421	0.371592068606357
PLOD1	Acute Lymphoblastic Leukemia	0.0398369607141429	0.0548491114055311	0.471991081570186			NODAL	Acute lymphocytic leukaemia	0.238375195568148	0.147198909906021	0.203797096926494
PLXDC1	Acute Lymphoblastic Leukemia	-0.117756	0.0662789435139834	0.0868919862124644			TXLNA	Acute lymphocytic leukaemia	0.234559039602154	0.218989826481286	0.333081753082476
PNPLA7	Acute Lymphoblastic Leukemia	0.0522338878982668	0.0416957767416155	0.217955644170907			GPT	Acute lymphocytic leukaemia	0.0900387267800745	0.0804928566469237	0.30022581818894
POC5	Acute Lymphoblastic Leukemia	-0.0114158	0.0449417934300696	0.801062049140118			CDH8	Acute lymphocytic leukaemia	-0.084659	0.101351363491887	0.423055591537945
PODXL	Acute Lymphoblastic Leukemia	-0.126683	0.167420483888838	0.491364797829889			FLT4	Acute lymphocytic leukaemia	-0.0152411	0.0488453454813967	0.757714426030623
POGZ	Acute Lymphoblastic Leukemia	-0.0722067	0.113743272332905	0.548971101554538			SHC1	Acute lymphocytic leukaemia	0.222804193009935	0.180025436045385	0.341438339183034
POLL	Acute Lymphoblastic Leukemia	-0.00364364	0.153744001269712	0.982580639261349			OLR1	Acute lymphocytic leukaemia	0.056700513973791	0.133725599331746	0.693369608511642
POLR1D	Acute Lymphoblastic Leukemia	-0.122432	0.0433108250601186	0.00723618991231795			CFHR5	Acute lymphocytic leukaemia	-0.12097	0.0882746943823169	0.207786699179034
POLR2B	Acute Lymphoblastic Leukemia	0.0607616240757234	0.173355164011618	0.749127592686637			IGF2R	Acute lymphocytic leukaemia	0.0507929275192604	0.0537847617741004	0.369638935099138
POLR2J	Acute Lymphoblastic Leukemia	-0.1342	0.0415462525284356	0.00255440739507938			NID2	Acute lymphocytic leukaemia	0.0179840175768887	0.095520861616908	0.856868810923051
POM121B	Acute Lymphoblastic Leukemia	-0.0288772	0.0588447264828234	0.628472389379755			WIF1	Acute lymphocytic leukaemia	-0.0808246	0.12365304221604	0.542206059609021
POMC	Acute Lymphoblastic Leukemia	-0.12497	0.0416028565998141	0.00614861584201292			GRAP2	Acute lymphocytic leukaemia	-0.343968	0.443165396446125	0.494226616302118
POPDC2	Acute Lymphoblastic Leukemia	0.0183976740706209	0.0553112836282688	0.741659576088887			TEC	Acute lymphocytic leukaemia	-0.0406946	0.2282270471821	0.874907753721705
PP13439	Acute Lymphoblastic Leukemia	-0.000696442	0.0735328215609667	0.992649830311966			AKR1B10	Acute lymphocytic leukaemia	-0.021943	0.0807544994156413	0.791361353656144
PPA1	Acute Lymphoblastic Leukemia	-0.108635	0.0664777744242343	0.113423044007905			EPHA4	Acute lymphocytic leukaemia	0.0387695272246727	0.0516096771111803	0.464969259982834
PPARG	Acute Lymphoblastic Leukemia	-0.0532236	0.0534618614473451	0.328647962441707			GHRH	Acute lymphocytic leukaemia	0.179673991124435	0.178976587488238	0.421152840877535
PPIE	Acute Lymphoblastic Leukemia	0.0215333028448462	0.030866593380489	0.487722603147391			LGR5	Acute lymphocytic leukaemia	0.259337299434298	0.204326501391084	0.332071645393812
PPIEL	Acute Lymphoblastic Leukemia	0.0329753241596217	0.100255021751807	0.750665485041352			TIGIT	Acute lymphocytic leukaemia	-0.289314	0.529298825309154	0.622685526585927
PPM1F	Acute Lymphoblastic Leukemia	-0.0451329	0.0429271747373606	0.300089718578935			TREM2	Acute lymphocytic leukaemia	0.104463419505439	0.0437733980525393	0.0229020953265098
PPM1G	Acute Lymphoblastic Leukemia	-0.0644116	0.129269114656077	0.652528876559818			BPIFA2	Acute lymphocytic leukaemia	0.101267344644554	0.0756549295792554	0.217510513643522
PPM1K	Acute Lymphoblastic Leukemia	-0.0412999	0.158540021285727	0.803186586116196			LGR4	Acute lymphocytic leukaemia	0.00263854065520877	0.300762407145637	0.99379678427714
PPM1L	Acute Lymphoblastic Leukemia	0.0731893350297994	0.0505201337847653	0.166731614781279			CDH11	Acute lymphocytic leukaemia	0.00284446227992541	0.0639589145952793	0.964968201542326
PPOX	Acute Lymphoblastic Leukemia	0.0373175562124498	0.0606842597109994	0.548455822345478			UNC5D	Acute lymphocytic leukaemia	0.112051233882618	0.164502802887429	0.566063745337753
PPP1R13B	Acute Lymphoblastic Leukemia	0.125254671168958	0.146483695254266	0.455362333985855			BTLA	Acute lymphocytic leukaemia	0.254449766241597	0.219004338488282	0.452427821899754
PPP1R14A	Acute Lymphoblastic Leukemia	0.0236772418048437	0.0565283433844722	0.680018280457254			DKKL1	Acute lymphocytic leukaemia	-0.0669186	0.106071159491838	0.551375186403686
PPP2R1B	Acute Lymphoblastic Leukemia	0.0266792323552603	0.0983742161291539	0.790193897449351			CDH6	Acute lymphocytic leukaemia	0.0448117418303293	0.376667884800736	0.916172417812601
PPP2R2B	Acute Lymphoblastic Leukemia	0.0902236624232962	0.0736090408473645	0.240526054779047			FLT1	Acute lymphocytic leukaemia	0.0475315928530639	0.0916189887472241	0.655598281828438
PPP6R1	Acute Lymphoblastic Leukemia	0.1193933859267	0.10223037895121	0.327228475425256			DSG3	Acute lymphocytic leukaemia	0.224845955131119	0.262795563406622	0.440447017241274
PRC1	Acute Lymphoblastic Leukemia	-0.138503	0.0931898788476287	0.187764224646986			NRXN3	Acute lymphocytic leukaemia	0.145761245275451	0.119144866099115	0.255990267284508
PRDX3	Acute Lymphoblastic Leukemia	-0.181596	0.0924987334055672	0.0713778841033186			TLR1	Acute lymphocytic leukaemia	0.248504971053811	0.246762272623381	0.37087965895862
PRELID1	Acute Lymphoblastic Leukemia	0.0716653705748587	0.0696997241204175	0.321292736842393			STAT5B	Acute lymphocytic leukaemia	-0.0797884	0.108051578308697	0.484270129411367
PRG4	Acute Lymphoblastic Leukemia	-0.0432781	0.0872342867610771	0.62957776348216			MYOC	Acute lymphocytic leukaemia	0.0346871965333258	0.0570002286378963	0.557870499214541
PRICKLE1	Acute Lymphoblastic Leukemia	-0.00121309	0.0547886886076049	0.982566157396338			A1BG	Acute lymphocytic leukaemia	0.0119638483053014	0.0853138872629766	0.891942127180872
PRKAB1	Acute Lymphoblastic Leukemia	-0.00506779	0.035680758131946	0.887734202709144			NUDT2	Acute lymphocytic leukaemia	-0.146143	0.127529250304002	0.456767798093096
PRKAB2	Acute Lymphoblastic Leukemia	-0.0145549	0.0999908654299626	0.88572430876716			B3GNT4	Acute lymphocytic leukaemia	-0.0510656	0.173476120249078	0.78030699492407
PRKCD	Acute Lymphoblastic Leukemia	-0.0974954	0.102094472770925	0.367563116614594			CSN2	Acute lymphocytic leukaemia	0.0982221817652812	0.216793746683249	0.694907217992759
PRKG1	Acute Lymphoblastic Leukemia	-0.06631	0.139647649257747	0.681701769342352			CHIA	Acute lymphocytic leukaemia	0.110975207564313	0.182674639160095	0.576316899012327
PRLR	Acute Lymphoblastic Leukemia	0.233663724962378	0.156120152962796	0.165352478358185			FADD	Acute lymphocytic leukaemia	0.0672126522193072	0.0657716582356823	0.340836139992655
PRMT6	Acute Lymphoblastic Leukemia	-0.00549048	0.0453293567948964	0.904059561517338			FAIM	Acute lymphocytic leukaemia	0.0848060741115709	0.0855107340588184	0.347228314689621
PROC	Acute Lymphoblastic Leukemia	0.0361417314569975	0.0812144276013822	0.663111171537444			GLRX3	Acute lymphocytic leukaemia	0.102834285553814	0.27402928332701	0.771450207274763
PROSER2	Acute Lymphoblastic Leukemia	0.109751927141321	0.0737532999525439	0.160577508377422			GPN1	Acute lymphocytic leukaemia	-0.0924052	0.0698891829443785	0.243365033328679
PRPF40A	Acute Lymphoblastic Leukemia	-0.148608	1.02990937504468	0.908770569661323			AKR1B1	Acute lymphocytic leukaemia	-0.112453	0.144499326270877	0.517885790517775
PRPS1P2	Acute Lymphoblastic Leukemia	0.172395231538907	0.207611835193153	0.493667473082118			GSN	Acute lymphocytic leukaemia	-0.244947	0.142711754108475	0.161232636839474
PRPSAP2	Acute Lymphoblastic Leukemia	-0.0520346	0.114307172099451	0.65867665366574			KIRREL2	Acute lymphocytic leukaemia	0.0287472560688735	0.0631437607618808	0.654678101627681
PRR24	Acute Lymphoblastic Leukemia	0.0761906588537656	0.0473191226820981	0.115039614336223			LRP10	Acute lymphocytic leukaemia	0.436807946985582	0.143428622986562	0.0556263601115575
PRR4	Acute Lymphoblastic Leukemia	-0.0142451	0.0443368840386856	0.749899474638406			SDC3	Acute lymphocytic leukaemia	-0.104334	0.163849950779858	0.55228610902327
PSMD9	Acute Lymphoblastic Leukemia	-0.102311	0.110022774321794	0.388300705418254			CDH17	Acute lymphocytic leukaemia	0.0598676626227819	0.0420856871720221	0.165191223827051
PSPHP1	Acute Lymphoblastic Leukemia	-0.0196994	0.0518219419810334	0.706818015767774			RSPO1	Acute lymphocytic leukaemia	0.0508433524551761	0.070686621128067	0.504173989847417
PSTK	Acute Lymphoblastic Leukemia	0.0103651977078007	0.0859201621198418	0.905974518612486			ENO3	Acute lymphocytic leukaemia	-0.108436	0.097205191304769	0.345931366513981
PSTPIP1	Acute Lymphoblastic Leukemia	-0.0398935	0.0401689797229607	0.325951353501318			CD69	Acute lymphocytic leukaemia	-0.0474013	0.366049455909398	0.905161093132581
PTBP3	Acute Lymphoblastic Leukemia	0.00832512957810508	0.103145274295892	0.937653131708865			LY75	Acute lymphocytic leukaemia	-0.0315914	0.0384889155891126	0.418238917473887
PTCH1	Acute Lymphoblastic Leukemia	-0.00808851	0.0451149429410739	0.859715233798011			BMP3	Acute lymphocytic leukaemia	0.131105543781358	0.245284618113363	0.6213201308891
PTDSS2	Acute Lymphoblastic Leukemia	-0.0120429	0.0746086595775554	0.874693769794478			GDF10	Acute lymphocytic leukaemia	-0.0255388	0.215546945317892	0.913172587762765
PTER	Acute Lymphoblastic Leukemia	0.0059340568498577	0.049636060217628	0.905522179302299			COL6A2	Acute lymphocytic leukaemia	0.00407108190729252	0.0784887619516165	0.960317328781707
PTGDS	Acute Lymphoblastic Leukemia	-0.0187422	0.0908782205256133	0.840745893366947			CASK	Acute lymphocytic leukaemia	0.273110974263765	0.3637268841182	0.531055538652692
PTP4A1	Acute Lymphoblastic Leukemia	-0.000862428	0.0602357767860296	0.988927270578087			GDF3	Acute lymphocytic leukaemia	-0.031	0.190078278117303	0.880814204641437
PTPN12	Acute Lymphoblastic Leukemia	-0.0146459	0.0404066665653279	0.71901454220715			IL26	Acute lymphocytic leukaemia	0.0081143046487648	0.0427181923532313	0.851363262466035
PTPRE	Acute Lymphoblastic Leukemia	0.0283823320381711	0.054637045425232	0.607665401304158			LECT2	Acute lymphocytic leukaemia	-0.0264578	0.066869059808495	0.69991725992817
PVT1	Acute Lymphoblastic Leukemia	-0.0223358	0.0574679196769128	0.7020830594028			PPBP	Acute lymphocytic leukaemia	0.419423949360748	0.499508048137786	0.555341019995651
PZP	Acute Lymphoblastic Leukemia	-0.00513754	0.0553513685454318	0.926512455138611			REG1B	Acute lymphocytic leukaemia	0.0268098929894839	0.0727988790766938	0.71781480123324
QPCT	Acute Lymphoblastic Leukemia	-0.119683	0.090443603579482	0.212583827347151			SCUBE3	Acute lymphocytic leukaemia	-0.0374098	0.0905964686177627	0.719719250521632
QRICH1	Acute Lymphoblastic Leukemia	-0.0465833	0.0693501452987455	0.512700097037173			ENGASE	Acute lymphocytic leukaemia	-0.0544488	0.149973200463478	0.725967900515424
RAB12	Acute Lymphoblastic Leukemia	-0.367072	0.332413547604612	0.384560501458603			DEFA5	Acute lymphocytic leukaemia	0.0169584781973787	0.0563656334715382	0.766342047416198
RAB32	Acute Lymphoblastic Leukemia	-0.128158	0.106170993161723	0.281380652608928			SIGLEC5	Acute lymphocytic leukaemia	-0.0400715	0.0726444393398323	0.601138246829863
RAB40B	Acute Lymphoblastic Leukemia	-0.135585	0.0802136148417191	0.113104946912021			OCIAD1	Acute lymphocytic leukaemia	-0.118882	0.141924412660778	0.434321539191661
RAB44	Acute Lymphoblastic Leukemia	0.091339717219704	0.0841836572044394	0.293997662234812			PDE5A	Acute lymphocytic leukaemia	-0.106237	0.147785390492663	0.511981554205139
RAB4B	Acute Lymphoblastic Leukemia	0.100347653455968	0.0782790346448308	0.220692801452889			TNNT3	Acute lymphocytic leukaemia	-0.0120405	0.096491380234303	0.905556923581591
RAB6A	Acute Lymphoblastic Leukemia	0.0649195577226983	0.0837914424036683	0.452334859608652			NME4	Acute lymphocytic leukaemia	0.174866005385442	0.192725256841655	0.460002400525531
RAB8A	Acute Lymphoblastic Leukemia	-0.0623991	0.048061298746392	0.210565351224128			FHL1	Acute lymphocytic leukaemia	-0.0191764	0.18433762258489	0.920064276926629
RABEP1	Acute Lymphoblastic Leukemia	0.0441229798042502	0.036724409703453	0.233739962924292			CDCP1	Acute lymphocytic leukaemia	0.0100458197253267	0.0768181543668188	0.900228587248212
RABEPK	Acute Lymphoblastic Leukemia	0.0153418250215062	0.0453544670683799	0.737075546374507			APOL3	Acute lymphocytic leukaemia	0.0397670050633058	0.0695501871529228	0.583179025755415
RAMP3	Acute Lymphoblastic Leukemia	0.102659261868965	0.0848045144167052	0.260619806355949			ATXN3	Acute lymphocytic leukaemia	-0.101746	0.107377044558051	0.413258757522029
RAP1GAP2	Acute Lymphoblastic Leukemia	0.0961269686869173	0.0952557121708497	0.328906869526198			COL6A1	Acute lymphocytic leukaemia	0.0198352630212516	0.0816653133854268	0.813003999628425
RAP1GDS1	Acute Lymphoblastic Leukemia	-0.116302	0.0556790658053442	0.052076407872218			MPZL1	Acute lymphocytic leukaemia	0.340063143840179	0.399788122389966	0.551280349725266
RAPGEF1	Acute Lymphoblastic Leukemia	0.0300183766865706	0.0391549534932245	0.446890915916646			RGS5	Acute lymphocytic leukaemia	0.352946227539993	0.191845493358707	0.316960983730566
RAPGEF3	Acute Lymphoblastic Leukemia	-0.0412364	0.0622996990255833	0.518073616839376			PDZK1	Acute lymphocytic leukaemia	-0.0102906	0.187927699990594	0.959773760025051
RAPH1	Acute Lymphoblastic Leukemia	0.270015570002477	0.259822734323551	0.487754451948847			LSM4	Acute lymphocytic leukaemia	-0.11932	0.0988206809837953	0.27269758538932
RARS2	Acute Lymphoblastic Leukemia	-0.25853	0.163212387199159	0.164281958921815			MAPRE2	Acute lymphocytic leukaemia	-0.0899319	0.120625104538303	0.533653412755869
RASA4B	Acute Lymphoblastic Leukemia	-0.0198668	0.0611354828986959	0.748146387775098			RCN3	Acute lymphocytic leukaemia	0.31901005903689	0.211541200813135	0.228665679001663
RAVER2	Acute Lymphoblastic Leukemia	0.00718507063544635	0.0410289386628635	0.863052606546151			SH3GLB1	Acute lymphocytic leukaemia	0.637362831939782	0.427171394449878	0.274214577611827
RB1	Acute Lymphoblastic Leukemia	-0.0783885	0.103224455039233	0.481861730019804			NANP	Acute lymphocytic leukaemia	0.301471473418713	0.220483943384616	0.402002395085505
RBBP6	Acute Lymphoblastic Leukemia	0.17546264826132	0.360909012467784	0.711915909241783			GSTZ1	Acute lymphocytic leukaemia	-0.0509836	0.0868295378021673	0.56528438771867
RBL2	Acute Lymphoblastic Leukemia	0.0350097129492615	0.0353076214512842	0.324875548034809			MSRB2	Acute lymphocytic leukaemia	-0.321024	0.413357123338898	0.518648586865128
RBM39	Acute Lymphoblastic Leukemia	-0.0615364	0.11135525105696	0.61903611393361			PHPT1	Acute lymphocytic leukaemia	-0.21168	0.139821704029267	0.371622847811596
RCL1	Acute Lymphoblastic Leukemia	0.0101983721867426	0.0812559177404773	0.904220198793794			ADAMTSL1	Acute lymphocytic leukaemia	0.0137307158005193	0.103316950017436	0.897555348396459
RCN1	Acute Lymphoblastic Leukemia	-0.0846728	0.165807422062322	0.660366442940634			ENPP2	Acute lymphocytic leukaemia	-0.262062	0.14965769044148	0.178232216007479
RCOR1	Acute Lymphoblastic Leukemia	0.00179679644585099	0.109660666869998	0.987384430204296			OSBPL9	Acute lymphocytic leukaemia	0.732340252414724	1.39144345267434	0.691571200321548
RCVRN	Acute Lymphoblastic Leukemia	0.0786776390603732	0.0592042204287333	0.193573619069942			MDGA1	Acute lymphocytic leukaemia	-0.107208	0.0648413682333687	0.1204914913569
RDH13	Acute Lymphoblastic Leukemia	0.0928776076202556	0.0631610248204578	0.150116290828703			CADM2	Acute lymphocytic leukaemia	-0.206329	0.160781718700825	0.289542278268224
RECQL	Acute Lymphoblastic Leukemia	-0.0538041	0.0632608997316662	0.410432836375172			OMG	Acute lymphocytic leukaemia	0.192221409714592	0.120542502262355	0.149459817861612
REEP1	Acute Lymphoblastic Leukemia	-0.0104402	0.0431657338948025	0.810382690493651			RNASET2	Acute lymphocytic leukaemia	-0.0346152	0.0624084962903732	0.599180464397341
RELT	Acute Lymphoblastic Leukemia	0.0905515887056242	0.0669680672639664	0.193069798585962			CD14	Acute lymphocytic leukaemia	-0.0228224	0.0647048012060118	0.729954619983176
REPS1	Acute Lymphoblastic Leukemia	-0.0387481	0.0485351867804664	0.437124490133727			SEMA4A	Acute lymphocytic leukaemia	-0.0123712	0.0443554898151701	0.782702300942034
RETSAT	Acute Lymphoblastic Leukemia	-0.0248449	0.0444199553385854	0.57891505468446			SLITRK6	Acute lymphocytic leukaemia	-0.0714539	0.101759470357674	0.505235779861065
RFWD3	Acute Lymphoblastic Leukemia	0.0168215344629449	0.0512798261306763	0.744515603289113			TLR3	Acute lymphocytic leukaemia	0.0222067852550577	0.139878613776676	0.879068769182907
RGL1	Acute Lymphoblastic Leukemia	-0.015689	0.056681872862238	0.784049398294756			PLXNB3	Acute lymphocytic leukaemia	0.0856560984331357	0.288513587774997	0.781330701459047
RHD	Acute Lymphoblastic Leukemia	0.0273455288011201	0.0299665697462996	0.365139565362799			ALPL	Acute lymphocytic leukaemia	0.0347407838154602	0.128616952266642	0.797869412961701
RHOH	Acute Lymphoblastic Leukemia	0.0712869415189387	0.189466584124746	0.731763480896792			SULT1E1	Acute lymphocytic leukaemia	0.326033180481705	0.254716455663827	0.422211816380557
RHOQ	Acute Lymphoblastic Leukemia	0.0194375091859938	0.0957426409189319	0.844895857795794			HBB	Acute lymphocytic leukaemia	0.0337830422439635	0.121499598046546	0.78725562026216
RHPN1	Acute Lymphoblastic Leukemia	-0.0291257	0.0987916730594249	0.779980538560708			GSTA1	Acute lymphocytic leukaemia	0.10474318431031	0.0641316159883696	0.14643363983155
RIMKLB	Acute Lymphoblastic Leukemia	-0.0258104	0.117508045703656	0.862353454201898			PDGFD	Acute lymphocytic leukaemia	-0.0166296	0.0548974974629462	0.767137468921475
RIPK1	Acute Lymphoblastic Leukemia	-0.00462034	0.0576304396201502	0.937540570891222			BLVRB	Acute lymphocytic leukaemia	0.0997059149004993	0.167375206449522	0.611807572790313
RMND1	Acute Lymphoblastic Leukemia	0.00325681978668272	0.097061600158383	0.973742404647447			KIR2DS4	Acute lymphocytic leukaemia	0.122674397545866	0.132072124012372	0.421483513115694
RNASE2	Acute Lymphoblastic Leukemia	-0.059457	0.0434013257292933	0.178542849488891			KIR2DL3	Acute lymphocytic leukaemia	0.0852582282372945	0.0515152958060665	0.120158718381079
RNASE3	Acute Lymphoblastic Leukemia	-0.0433472	0.0449111862912358	0.340895620649801			PTGES3	Acute lymphocytic leukaemia	-0.119746	0.0817512485102996	0.177023955723083
RNF130	Acute Lymphoblastic Leukemia	0.0525371269296994	0.0551711393049635	0.354310647821332			VPS28	Acute lymphocytic leukaemia	0.0982032936147099	0.138778355549341	0.499269756313386
RNF144A	Acute Lymphoblastic Leukemia	-0.156634	0.117279869565331	0.252625103441707			DCLK1	Acute lymphocytic leukaemia	0.0329979589856583	0.0559551255957583	0.567292754334588
RNF182	Acute Lymphoblastic Leukemia	-0.00612622	0.0355835729670439	0.863989827592096			ANXA3	Acute lymphocytic leukaemia	0.118899255807243	0.17703891335363	0.623496757159261
RNF185	Acute Lymphoblastic Leukemia	0.0326182683621005	0.0513616601214569	0.529897701323822			ANXA4	Acute lymphocytic leukaemia	-0.132962	0.121534629723451	0.471433992552152
RNF219	Acute Lymphoblastic Leukemia	-0.033606	0.0595857655190881	0.578732906761397			PPBP	Acute lymphocytic leukaemia	0.260138803701005	0.549714292460502	0.718614389916018
RNF24	Acute Lymphoblastic Leukemia	0.0918592917210935	0.0673697859165173	0.190507558350061			CALCB	Acute lymphocytic leukaemia	0.0388605116786957	0.0999681125376938	0.734957400015864
RNF40	Acute Lymphoblastic Leukemia	0.0151953128556539	0.112516001597371	0.894494607553589			MAP2K6	Acute lymphocytic leukaemia	0.304571541417396	0.246338808037871	0.304286509637028
RP1-127C7.6	Acute Lymphoblastic Leukemia	-0.103632	0.291437751845581	0.782502448543359			KIR2DL1	Acute lymphocytic leukaemia	0.0433262866976034	0.108451845984006	0.703358778727245
RP1-197B17.3	Acute Lymphoblastic Leukemia	-0.0444083	0.0434003625797378	0.319054181883647			RAB5A	Acute lymphocytic leukaemia	0.397206764357768	0.320783871964314	0.432492394840414
RP1-28O10.1	Acute Lymphoblastic Leukemia	0.0377025317324042	0.0898014470138479	0.684445010581229			SULT2B1	Acute lymphocytic leukaemia	-0.118649	0.191234844716696	0.568573541916116
RP1-34L19.1	Acute Lymphoblastic Leukemia	0.148411889029579	0.0673307914886556	0.044744852193387			TCL1A	Acute lymphocytic leukaemia	0.0140764644307227	0.0737409075924349	0.852847820300993
RP1-97J1.2	Acute Lymphoblastic Leukemia	0.0743228314779021	0.0788877264538208	0.364704894188072			OGN	Acute lymphocytic leukaemia	-0.0716812	0.0953462235386731	0.49398921382821
RP11-104L21.2	Acute Lymphoblastic Leukemia	0.0827032694722403	0.111565649568649	0.479705866770704			LCP1	Acute lymphocytic leukaemia	0.184513756011975	0.0823300434933491	0.0599762794382802
RP11-1070N10.3	Acute Lymphoblastic Leukemia	0.116802244831072	0.0728505630306736	0.126267961689906			AASDHPPT	Acute lymphocytic leukaemia	0.361013370505913	0.2465563408125	0.239349439439419
RP11-107F6.3	Acute Lymphoblastic Leukemia	-0.0709077	0.0671374349051574	0.304141150449824			GUK1	Acute lymphocytic leukaemia	-0.0527443	0.144974681263977	0.730871982768039
RP11-108K14.4	Acute Lymphoblastic Leukemia	0.114951527102368	0.183056061867295	0.557593142825723			CNPY3	Acute lymphocytic leukaemia	-0.00870578	0.144153997487694	0.9573351133937
RP11-111H3.1	Acute Lymphoblastic Leukemia	0.163051868814054	0.173308209852774	0.389992689555452			BDH2	Acute lymphocytic leukaemia	0.0603601673264052	0.120226053352189	0.665449348939165
RP11-114H24.6	Acute Lymphoblastic Leukemia	0.350985851842058	0.206204437836922	0.187285777191136			KREMEN1	Acute lymphocytic leukaemia	-0.0309883	0.0512315768077059	0.5511888075345
RP11-115C21.2	Acute Lymphoblastic Leukemia	0.0776143780209071	0.0923247977929731	0.418433635589149			VAMP2	Acute lymphocytic leukaemia	-0.446469	0.190698098373077	0.144038706461009
RP11-115L11.1	Acute Lymphoblastic Leukemia	-0.00539936	0.0503724360731349	0.915656695857063			ACAT2	Acute lymphocytic leukaemia	-0.0286836	0.185431499184849	0.891269085816146
RP11-120K18.3	Acute Lymphoblastic Leukemia	-0.154844	0.0927532747403009	0.120893163464901			AGR3	Acute lymphocytic leukaemia	0.0381455153917948	0.121733991585718	0.760451816031242
RP11-1280N14.3	Acute Lymphoblastic Leukemia	0.398138802544147	0.41329694937255	0.511891087728081			SNPH	Acute lymphocytic leukaemia	-0.0739866	0.159089697436717	0.666076311955753
RP11-1319K7.1	Acute Lymphoblastic Leukemia	0.587935856451621	1.39277864155809	0.745709509642207			STOML1	Acute lymphocytic leukaemia	0.0362507139966905	0.101937169458462	0.734294969945922
RP11-1365D11.1	Acute Lymphoblastic Leukemia	0.0276477491970654	0.146428389546983	0.85943142823787			FDCSP	Acute lymphocytic leukaemia	-0.00857627	0.208321858092352	0.970901901166947
RP11-1398P2.1	Acute Lymphoblastic Leukemia	0.0469281430194057	0.0492871799492889	0.346891587438881			CHMP2B	Acute lymphocytic leukaemia	-0.00678371	0.111070051610222	0.95685299828231
RP11-140A10.3	Acute Lymphoblastic Leukemia	-0.0332706	0.0656593723724965	0.626022821523066			SEPSECS	Acute lymphocytic leukaemia	-0.132279	0.262011465821851	0.702363509898188
RP11-142C4.6	Acute Lymphoblastic Leukemia	0.159792899558241	0.0969297546214563	0.150337072893548			DCUN1D1	Acute lymphocytic leukaemia	-0.0240903	0.100837676429372	0.818025592718856
RP11-147L13.8	Acute Lymphoblastic Leukemia	0.00548039541385265	0.0672373275426503	0.936048692481882			STMN1	Acute lymphocytic leukaemia	-0.0642466	0.421036281064489	0.892724120441415
RP11-153A23.6	Acute Lymphoblastic Leukemia	-0.0692349	0.0677396626956369	0.318950855930558			AKR1C3	Acute lymphocytic leukaemia	0.0732035782083763	0.0810442282371901	0.387631405366112
RP11-160H22.5	Acute Lymphoblastic Leukemia	-0.0636385	0.110472741013894	0.582615996098861			STARD5	Acute lymphocytic leukaemia	-0.0730278	0.0990796743175324	0.514496398615467
RP11-164P12.4	Acute Lymphoblastic Leukemia	-0.120012	0.17644935715912	0.619760441289167			RBM17	Acute lymphocytic leukaemia	-0.0224685	0.0701234841328469	0.764695011121414
RP11-165J3.6	Acute Lymphoblastic Leukemia	0.0954949625848251	0.0488440242169705	0.0602701938802826			ACADS	Acute lymphocytic leukaemia	-0.206147	0.116401954520985	0.114512669419843
RP11-16E12.2	Acute Lymphoblastic Leukemia	0.0543119832037861	0.194408798011238	0.80620079029702			ADH1A	Acute lymphocytic leukaemia	0.100652674939705	0.132595537872361	0.527061755136152
RP11-18H21.1	Acute Lymphoblastic Leukemia	0.123481591790541	0.0458600660642302	0.0103947296149269			HSD17B11	Acute lymphocytic leukaemia	-0.290524	0.333199273668559	0.543490311765194
RP11-195E2.1	Acute Lymphoblastic Leukemia	0.0346082037372024	0.0895375743216297	0.707207449561704			HMOX1	Acute lymphocytic leukaemia	0.0182448872303699	0.0640006562932294	0.778519029255479
RP11-195E2.4	Acute Lymphoblastic Leukemia	-0.0766903	0.0783255754070184	0.353103707879599			ACOT8	Acute lymphocytic leukaemia	0.0280746587875772	0.132375889824251	0.839063475379795
RP11-212I21.2	Acute Lymphoblastic Leukemia	0.0474821354347074	0.0537766062377963	0.386398312432738			ACADSB	Acute lymphocytic leukaemia	0.268654290338584	0.170612125519469	0.21341003552324
RP11-213G21.1	Acute Lymphoblastic Leukemia	0.164267520947882	0.137039447077494	0.284357626295657			ARL5B	Acute lymphocytic leukaemia	-0.0295093	0.0661210727289148	0.667219247331291
RP11-229P13.19	Acute Lymphoblastic Leukemia	0.0341188350253933	0.0511708858053454	0.509174878709059			PMM1	Acute lymphocytic leukaemia	-0.132192	0.181056751547856	0.505781349438298
RP11-229P13.20	Acute Lymphoblastic Leukemia	0.120001214368581	0.220347046184544	0.682524956634307			CETN3	Acute lymphocytic leukaemia	0.113872119148505	0.232287562597014	0.649651159316047
RP11-248C1.2	Acute Lymphoblastic Leukemia	-0.0391249	0.0514083922351681	0.458419159384757			TES	Acute lymphocytic leukaemia	0.121077933773758	0.145494563392322	0.558148748644211
RP11-24F11.2	Acute Lymphoblastic Leukemia	-0.0322202	0.121636790037648	0.801668269145927			AK4	Acute lymphocytic leukaemia	-0.0939294	0.102640275020336	0.395411423763237
RP11-253D19.1	Acute Lymphoblastic Leukemia	0.103623614180441	0.123125327446692	0.447379526743261			ETFA	Acute lymphocytic leukaemia	-0.016929	0.198719925703433	0.933975284150603
RP11-266K4.9	Acute Lymphoblastic Leukemia	0.107033686565171	0.346822722177185	0.809434904830308			CSNK1G2	Acute lymphocytic leukaemia	0.542245608811924	0.46100103105091	0.448557731689915
RP11-274B21.1	Acute Lymphoblastic Leukemia	0.0891696353075066	0.107117301195896	0.43263511106811			ALPI	Acute lymphocytic leukaemia	-0.0601494	0.07117128673083	0.43659718748809
RP11-274B21.2	Acute Lymphoblastic Leukemia	-0.0219101	0.0771538246886682	0.779666602605202			SFRP4	Acute lymphocytic leukaemia	0.0118638321390321	0.0710350425357674	0.872081420267783
RP11-274B21.3	Acute Lymphoblastic Leukemia	-0.0604526	0.102404031007262	0.560722877258561			CD9	Acute lymphocytic leukaemia	0.0117543170398134	0.147553294522765	0.941522840798075
RP11-274B21.4	Acute Lymphoblastic Leukemia	0.0398452678654192	0.0920418540509527	0.668523224776635			CP	Acute lymphocytic leukaemia	-0.0507054	0.078219611080773	0.534986285683167
RP11-288L9.4	Acute Lymphoblastic Leukemia	0.211063036671411	0.28436739717548	0.593516374951952			EGFL6	Acute lymphocytic leukaemia	0.0840629938227362	0.0795782061725828	0.321658487463282
RP11-290F20.1	Acute Lymphoblastic Leukemia	-0.160128	0.0947171131912679	0.121793954889574			FOLR1	Acute lymphocytic leukaemia	-1.4541	0.709095958144228	0.132683180812523
RP11-290F20.3	Acute Lymphoblastic Leukemia	0.0242119075363559	0.0564995785089515	0.672626952576435			GOLM1	Acute lymphocytic leukaemia	0.0188481351184412	0.0641794129405142	0.773639480485452
RP11-295P9.3	Acute Lymphoblastic Leukemia	-0.0023153	0.0691410910940051	0.973563443592057			MX1	Acute lymphocytic leukaemia	0.0412177493555832	0.0581468894863402	0.493163834453923
RP11-297N6.4	Acute Lymphoblastic Leukemia	0.0338407562654314	0.052881331529281	0.532546663480203			IRF1	Acute lymphocytic leukaemia	-0.401889	4.68662082181252	0.945541572899504
RP11-318C24.2	Acute Lymphoblastic Leukemia	-0.171612	0.103421780896288	0.125255915002452			DHRS9	Acute lymphocytic leukaemia	-0.167105	0.09618056928539	0.224446752597282
RP11-326C3.12	Acute Lymphoblastic Leukemia	-0.0804101	0.0409753307447008	0.0597227494260166			SUFU	Acute lymphocytic leukaemia	0.000638197022453069	0.395568123731299	0.998859177164247
RP11-326C3.2	Acute Lymphoblastic Leukemia	-0.0406995	0.0857659260930194	0.646416096107666			YEATS4	Acute lymphocytic leukaemia	-0.428117	1.47058812446499	0.819652062274715
RP11-327F22.2	Acute Lymphoblastic Leukemia	-0.0608271	0.120640256506894	0.629598142155981			PBK	Acute lymphocytic leukaemia	-0.181369	0.171362506638026	0.349556268846471
RP11-327F22.6	Acute Lymphoblastic Leukemia	-0.04345	0.0630368580806774	0.499948721503709			SH3BGRL3	Acute lymphocytic leukaemia	0.00391754516461178	0.0617629385424651	0.950981313757651
RP11-334C17.5	Acute Lymphoblastic Leukemia	-0.0300294	0.0457642350100509	0.515771138746075			SIRT3	Acute lymphocytic leukaemia	0.0235525072091272	0.0813078441669339	0.778630702360691
RP11-340F14.5	Acute Lymphoblastic Leukemia	0.0636224105834184	0.0805087194348198	0.452165636804241			NAALADL1	Acute lymphocytic leukaemia	-0.283084	0.120655466478551	0.0513723516713542
RP11-347I19.3	Acute Lymphoblastic Leukemia	0.204729134858386	0.152834647085159	0.408245785654133			HPD	Acute lymphocytic leukaemia	0.26957977124607	0.296796491525411	0.530568695964946
RP11-356I2.2	Acute Lymphoblastic Leukemia	0.00746984700772389	0.0716950802010959	0.919304164939537			SRP14	Acute lymphocytic leukaemia	0.124729100469425	0.196060922552332	0.589753779080212
RP11-367J7.2	Acute Lymphoblastic Leukemia	0.349593846789397	0.654366878598866	0.630225388515862			RPP30	Acute lymphocytic leukaemia	-0.00391388	0.109040832961207	0.973086944211657
RP11-37B2.1	Acute Lymphoblastic Leukemia	0.0140779326471749	0.0494586255296593	0.777465001808539			ANXA11	Acute lymphocytic leukaemia	-0.268868	0.173914368224301	0.262148541928319
RP11-390P2.4	Acute Lymphoblastic Leukemia	0.00996040729024375	0.0620928543508722	0.87402074374947			HSPA13	Acute lymphocytic leukaemia	0.0227408906430939	0.0695201268237494	0.754693911346578
RP11-392A22.2	Acute Lymphoblastic Leukemia	0.0226607036769478	0.046378184379754	0.628003582869982			RAB3A	Acute lymphocytic leukaemia	0.0412281103986661	0.115726064941624	0.739645241028369
RP11-404F10.2	Acute Lymphoblastic Leukemia	-0.852446	1.0680069470549	0.571159397445982			ING4	Acute lymphocytic leukaemia	-0.0262531	0.102804192582808	0.804177539633834
RP11-424I19.2	Acute Lymphoblastic Leukemia	0.127892175737153	0.19109286933185	0.551225653936933			CA5B	Acute lymphocytic leukaemia	0.076707601789763	0.157269359182875	0.659151808689004
RP11-439E19.8	Acute Lymphoblastic Leukemia	0.174268365291137	0.161664555482097	0.393790745790782			CD160	Acute lymphocytic leukaemia	0.0463486723421786	0.123640752414557	0.720653313675934
RP11-439E19.9	Acute Lymphoblastic Leukemia	-0.0927578	0.129202106332197	0.499787978314588			EPHB1	Acute lymphocytic leukaemia	-0.00591466	0.153778360372694	0.972813148572333
RP11-445H22.3	Acute Lymphoblastic Leukemia	-0.0532986	0.081523385127433	0.523148844085117			CD46	Acute lymphocytic leukaemia	-0.0329061	0.0981297164934728	0.750986097303796
RP11-452D12.1	Acute Lymphoblastic Leukemia	0.0346232288708361	0.161065579913405	0.838288553277367			APOA4	Acute lymphocytic leukaemia	0.0159391514896287	0.173074779399332	0.932428481073063
RP11-458F8.1	Acute Lymphoblastic Leukemia	0.0288466256370977	0.150941731934425	0.855956625887353			TBCB	Acute lymphocytic leukaemia	-0.0566928	0.182195423697312	0.807952078594551
RP11-459O1.2	Acute Lymphoblastic Leukemia	-0.0377606	0.0374567122760478	0.318159970797971			TPP1	Acute lymphocytic leukaemia	-0.149968	0.0839932530488175	0.104492829331264
RP11-464D20.6	Acute Lymphoblastic Leukemia	0.0521865783850349	0.122463476283208	0.687728327864881			BTN3A3	Acute lymphocytic leukaemia	-0.014627	0.0768319465314096	0.851566168327522
RP11-465B22.3	Acute Lymphoblastic Leukemia	-0.0988035	0.0636203740916212	0.142727791455651			PSME2	Acute lymphocytic leukaemia	-0.0917897	0.193197329058345	0.717635587006561
RP11-472B18.2	Acute Lymphoblastic Leukemia	-0.208839	0.205002377655919	0.383336278112429			OVCA2	Acute lymphocytic leukaemia	-0.203125	0.153185407286351	0.411350142249859
RP11-535M15.2	Acute Lymphoblastic Leukemia	0.0855272613458062	0.286234040077731	0.815152856405066			WBP2	Acute lymphocytic leukaemia	0.394181745755332	0.65008479870601	0.652992108561144
RP11-539L10.2	Acute Lymphoblastic Leukemia	-0.00502491	0.0653186963832941	0.940362987213694			UGT1A1	Acute lymphocytic leukaemia	0.0308056745115344	0.109325899996099	0.796433105540072
RP11-540B6.2	Acute Lymphoblastic Leukemia	0.0960818513806842	0.0697276250263076	0.18147555509405			GMNN	Acute lymphocytic leukaemia	0.290109024886837	0.220640073766099	0.413939003757864
RP11-548B3.3	Acute Lymphoblastic Leukemia	-0.480708	0.305681834031208	0.256445996038056			TPD52L1	Acute lymphocytic leukaemia	0.193971522732995	0.271147789058153	0.548619186834572
RP11-54A4.2	Acute Lymphoblastic Leukemia	-0.0380132	0.122636906076823	0.767070805369051			IDI1	Acute lymphocytic leukaemia	0.0528958436506368	0.792022635354006	0.957545901619283
RP11-54C4.1	Acute Lymphoblastic Leukemia	0.0194603142269995	0.0567164768688309	0.735486151703595			GAS7	Acute lymphocytic leukaemia	0.0618559580668741	0.369885550346483	0.894514186241488
RP11-551L14.1	Acute Lymphoblastic Leukemia	0.104737012697205	0.0968782537859515	0.300892263951478			FKBP4	Acute lymphocytic leukaemia	-0.387546	0.206605426295105	0.311807005720111
RP11-555K12.1	Acute Lymphoblastic Leukemia	0.173807967083019	0.154733410169581	0.343100846456033			USH1C	Acute lymphocytic leukaemia	-0.266424	0.721212188472973	0.747266719484497
RP11-56F10.3	Acute Lymphoblastic Leukemia	0.130649334085021	0.0549439757537262	0.0261074035573076			SAR1A	Acute lymphocytic leukaemia	0.039121471721382	0.145756447465388	0.81353886533296
RP11-56M3.1	Acute Lymphoblastic Leukemia	-0.44799	1.03075933315314	0.738990983718844			GABARAP	Acute lymphocytic leukaemia	-0.0824306	0.444268039010552	0.883208116106382
RP11-589N15.2	Acute Lymphoblastic Leukemia	-0.0865244	0.136444192660869	0.549388305583434			APTX	Acute lymphocytic leukaemia	0.234376357001394	0.172506515267197	0.403932700153747
RP11-58E21.4	Acute Lymphoblastic Leukemia	0.0448257130960944	0.209848094216823	0.850648804332465			IVD	Acute lymphocytic leukaemia	0.192779587785173	0.144752283399935	0.275072795312044
RP11-598F7.4	Acute Lymphoblastic Leukemia	0.144356767491561	0.0935631431346816	0.153888939215083			RRAS	Acute lymphocytic leukaemia	-0.167452	0.14083931678656	0.319990619753793
RP11-62H7.2	Acute Lymphoblastic Leukemia	-0.0288263	0.0378302709944822	0.44758543693465			UBE2A	Acute lymphocytic leukaemia	0.254533938621512	0.36702234794633	0.537860986505154
RP11-63P12.6	Acute Lymphoblastic Leukemia	0.0868982927070733	0.0999044282477454	0.409739902459418			RAB11A	Acute lymphocytic leukaemia	-0.175576	0.413352670635389	0.712344257866096
RP11-645C24.5	Acute Lymphoblastic Leukemia	0.0741266017380542	0.0533220161149998	0.177785948694871			FIS1	Acute lymphocytic leukaemia	-0.0423438	0.187277396578746	0.858439312715573
RP11-65E22.2	Acute Lymphoblastic Leukemia	-0.1278	0.449644412903337	0.82370555136343			TRAF1	Acute lymphocytic leukaemia	-0.138985	0.175423332867451	0.464108746969061
RP11-664D1.1	Acute Lymphoblastic Leukemia	-0.0739491	0.0440620517256009	0.102198272829089			TP53I3	Acute lymphocytic leukaemia	-0.064428	0.0717094824936291	0.392343166614764
RP11-693J15.5	Acute Lymphoblastic Leukemia	-0.0790169	0.114354084955976	0.509124673640734			RRM2	Acute lymphocytic leukaemia	0.138150098317663	0.174926527440392	0.459731223837378
RP11-693N9.2	Acute Lymphoblastic Leukemia	0.03432026662735	0.126544708392366	0.793095820045902			CRYBB1	Acute lymphocytic leukaemia	-0.0410565	0.0859868927749825	0.649920187238648
RP11-696N14.1	Acute Lymphoblastic Leukemia	0.116540708090998	0.0624080947989244	0.082923738627836			ARG2	Acute lymphocytic leukaemia	-0.0120801	0.118187442317721	0.927913737705545
RP11-69E11.4	Acute Lymphoblastic Leukemia	0.0617305365980982	0.075647646290471	0.42918392922416			UGDH	Acute lymphocytic leukaemia	-0.0731809	0.115252619275025	0.590405336618489
RP11-6L6.2	Acute Lymphoblastic Leukemia	-0.0233933	0.047263590620319	0.623816175692354			DCTD	Acute lymphocytic leukaemia	-0.535155	0.690431250923816	0.580229590612897
RP11-704M14.1	Acute Lymphoblastic Leukemia	-0.0965079	0.0654892178905969	0.168609291902828			WDR5	Acute lymphocytic leukaemia	4.14336451427698	2.36240561826432	0.329892432032696
RP11-705O3.1	Acute Lymphoblastic Leukemia	0.0651944505425911	0.0697772804085207	0.356037295427468			RHOC	Acute lymphocytic leukaemia	-0.0105095	0.194831237350919	0.958488971636949
RP11-707O23.5	Acute Lymphoblastic Leukemia	0.0880730290299648	0.0445254624982235	0.0552088240768793			SNUPN	Acute lymphocytic leukaemia	0.0664653368347383	0.158415747774606	0.703038830084474
RP11-734I18.1	Acute Lymphoblastic Leukemia	-0.0635903	0.0634572919294142	0.327704696979619			NCF1	Acute lymphocytic leukaemia	0.200322054251938	0.23214013130985	0.427615421977423
RP11-73M18.7	Acute Lymphoblastic Leukemia	-0.122139	0.0980455428209568	0.268050004809604			EMC8	Acute lymphocytic leukaemia	0.00887035737121364	0.271300291352387	0.979192672801338
RP11-73M18.8	Acute Lymphoblastic Leukemia	-0.125297	0.0736093524029166	0.10281091512253			CRCP	Acute lymphocytic leukaemia	-1.4919	0.556852714501622	0.07510281177496
RP11-779O18.3	Acute Lymphoblastic Leukemia	-0.0188938	0.0916645676026809	0.842564334861423			UBD	Acute lymphocytic leukaemia	0.14311795424801	0.186382055171857	0.48538257052903
RP11-77H9.2	Acute Lymphoblastic Leukemia	0.0998206652384885	0.0653047398534595	0.140631010321154			NAPG	Acute lymphocytic leukaemia	0.283258657703234	0.248789566144006	0.337581884165357
RP11-77P16.4	Acute Lymphoblastic Leukemia	0.152309045979821	0.0814839879900617	0.0789239913975685			SDSL	Acute lymphocytic leukaemia	0.257169246773716	0.115746991844606	0.0904288500007423
RP11-797H7.3	Acute Lymphoblastic Leukemia	0.0954945338960175	0.0629090901627171	0.138264786645214			RAB32	Acute lymphocytic leukaemia	0.437004626177243	0.376212606338185	0.452497869794603
RP11-798G7.5	Acute Lymphoblastic Leukemia	-0.0234374	0.095834373089917	0.811298109351068			MAP1LC3A	Acute lymphocytic leukaemia	0.0253245385288284	0.0490867274083596	0.611866124211174
RP11-809N8.4	Acute Lymphoblastic Leukemia	-0.0943968	0.126827273190784	0.498046404191826			ACAA1	Acute lymphocytic leukaemia	0.138493248520705	0.0831281911471251	0.134271452211677
RP11-84C10.2	Acute Lymphoblastic Leukemia	0.0270973796932801	0.0502540472476021	0.594925128429722			MMAB	Acute lymphocytic leukaemia	0.103590626982476	0.107320656212766	0.37875416305381
RP11-85F14.5	Acute Lymphoblastic Leukemia	0.108076479187576	0.150054865274388	0.60263128250862			ALDH5A1	Acute lymphocytic leukaemia	-0.0130059	0.0556116933139424	0.817586926782637
RP11-85K15.2	Acute Lymphoblastic Leukemia	-0.00236479	0.0723950862436404	0.974584487840631			PMM2	Acute lymphocytic leukaemia	0.146550958544882	0.197065587076617	0.511025305321128
RP11-883A18.3	Acute Lymphoblastic Leukemia	-0.228496	0.0977285166420996	0.0519927898137618			IMPA1	Acute lymphocytic leukaemia	0.516087376504256	0.147471680580621	0.0394932905806595
RP11-923I11.6	Acute Lymphoblastic Leukemia	-0.0660855	0.0852833605431892	0.456334787037917			CUL1	Acute lymphocytic leukaemia	0.3473874202581	0.275992620207762	0.427405173815211
RP11-923I11.7	Acute Lymphoblastic Leukemia	-0.158924	0.146644061808627	0.339435869292147			PGLS	Acute lymphocytic leukaemia	-0.00743894	0.104333615802063	0.945923400271068
RP11-936I5.1	Acute Lymphoblastic Leukemia	-0.0651761	0.100355957234281	0.532270989440248			PNPO	Acute lymphocytic leukaemia	0.304530472284415	0.162298089607733	0.201419935545615
RP11-95P2.1	Acute Lymphoblastic Leukemia	-0.0718846	0.104282656503221	0.521296524025628			SDCBP	Acute lymphocytic leukaemia	0.0167804100659046	0.120305907006039	0.894514146924658
RP11-96H19.1	Acute Lymphoblastic Leukemia	-0.0320546	0.0473217558363737	0.503726599029633			SULT1C2	Acute lymphocytic leukaemia	0.0431763965876901	0.222190873184163	0.863873215998996
RP13-25N22.1	Acute Lymphoblastic Leukemia	0.00671905935688173	0.0687116948412188	0.922693556081971			PTP4A1	Acute lymphocytic leukaemia	-0.230498	0.313702133617429	0.596586108246724
RP13-753N3.1	Acute Lymphoblastic Leukemia	-0.173306	0.124914089232155	0.299691886968834			DDIT4	Acute lymphocytic leukaemia	0.22958329702013	0.273388790647033	0.48942564152995
RP13-98N21.2	Acute Lymphoblastic Leukemia	0.0188990361598327	0.0541610815433653	0.729285188656092			MLF1	Acute lymphocytic leukaemia	0.144329881631803	0.122192255480948	0.262443356509623
RP13-98N21.3	Acute Lymphoblastic Leukemia	0.0279402206456206	0.0458838732243705	0.546392319810544			NMT2	Acute lymphocytic leukaemia	0.0350021215041054	0.271107531269528	0.909085010903999
RP3-407E4.4	Acute Lymphoblastic Leukemia	-0.123849	0.0722009618836548	0.103446978378827			RERG	Acute lymphocytic leukaemia	-0.0150843	0.180861888844187	0.938785261315526
RP3-449M8.6	Acute Lymphoblastic Leukemia	0.00318641509456455	0.0962618942075166	0.974245015062353			EEF1D	Acute lymphocytic leukaemia	-0.014826	0.138295865919284	0.921393445787319
RP3-449M8.9	Acute Lymphoblastic Leukemia	0.0166821309955908	0.114400661989743	0.889758439935249			S100A14	Acute lymphocytic leukaemia	-0.105614	0.370304595806259	0.802306835653198
RP3-455J7.4	Acute Lymphoblastic Leukemia	0.0290982568345683	0.0797966582625092	0.721714146280346			IDI2	Acute lymphocytic leukaemia	0.188575032450899	0.243253276805517	0.580182311245829
RP3-460G2.2	Acute Lymphoblastic Leukemia	-0.0775818	0.0496897701855385	0.129295283708222			S100A16	Acute lymphocytic leukaemia	0.291427133036145	0.250524328387167	0.328836321815222
RP3-465N24.5	Acute Lymphoblastic Leukemia	-0.0080108	0.0470271491124681	0.866009572211868			CLIC2	Acute lymphocytic leukaemia	2.14264746414331	1.05003594534486	0.178095821675445
RP4-576H24.2	Acute Lymphoblastic Leukemia	-0.0853482	0.138209767934691	0.580594946639862			DRG1	Acute lymphocytic leukaemia	0.365997828262718	0.371087417781573	0.427965078611364
RP4-584D14.7	Acute Lymphoblastic Leukemia	-0.193285	0.086700525501628	0.076228169993898			KLF4	Acute lymphocytic leukaemia	0.271385185498607	0.243714621022202	0.381365046429335
RP4-647C14.3	Acute Lymphoblastic Leukemia	-0.0271267	0.130547899082318	0.842265473057087			ACADL	Acute lymphocytic leukaemia	-0.0398726	0.207436314309496	0.87910591611053
RP4-655C5.1	Acute Lymphoblastic Leukemia	-0.117958	0.091028918083788	0.242646138234306			CASP8	Acute lymphocytic leukaemia	-0.67822	0.583401063494694	0.452243561633168
RP4-659J6.2	Acute Lymphoblastic Leukemia	0.0726733415247074	0.064233148613968	0.284289504131594			PCMT1	Acute lymphocytic leukaemia	-0.343307	0.175738989454082	0.301199459051814
RP4-673D20.1	Acute Lymphoblastic Leukemia	0.00740303630881772	0.112824990969458	0.949518798296106			RHOB	Acute lymphocytic leukaemia	0.0823417063314261	0.183735308481217	0.672793901037035
RP4-673D20.3	Acute Lymphoblastic Leukemia	-0.089229	0.116617193873601	0.463776157250993			ASF1A	Acute lymphocytic leukaemia	0.112500753686718	0.159823760948754	0.532209185548478
RP4-673D20.4	Acute Lymphoblastic Leukemia	-0.160858	0.111191794339918	0.198134055650193			AKR7A3	Acute lymphocytic leukaemia	0.102221192451024	0.0978883298365794	0.344198119769093
RP4-740C4.6	Acute Lymphoblastic Leukemia	0.0149077094232201	0.0915440464438599	0.87334879706029			VAT1	Acute lymphocytic leukaemia	0.129795312655547	0.177899277373858	0.598727885330852
RP4-753D10.5	Acute Lymphoblastic Leukemia	0.0019312765507111	0.103547977041425	0.985576269754725			NAE1	Acute lymphocytic leukaemia	0.0166940984490925	0.324661559629012	0.962223080162528
RP4-798C17.5	Acute Lymphoblastic Leukemia	-0.00889159	0.0794587381824811	0.912489667942621			TSSC4	Acute lymphocytic leukaemia	-0.251171	0.237907158589812	0.482738972176348
RP4-798C17.6	Acute Lymphoblastic Leukemia	0.00719328598844269	0.0835623837622638	0.93240633413102			PCK1	Acute lymphocytic leukaemia	0.0631519676466756	0.142078151779519	0.679679909858081
RP4-800G7.2	Acute Lymphoblastic Leukemia	0.0625826104269433	0.0458109862231161	0.183606729147057			LDLRAP1	Acute lymphocytic leukaemia	0.0376965246035565	0.105388647630326	0.744259887951944
RP5-1021I20.1	Acute Lymphoblastic Leukemia	0.029084559393952	0.0348286919168515	0.408762296192354			ALDOB	Acute lymphocytic leukaemia	0.00024173362100264	0.102396030053365	0.998192912779591
RP5-1074L1.1	Acute Lymphoblastic Leukemia	-0.0864246	0.185980868319102	0.666316846220659			ASPA	Acute lymphocytic leukaemia	0.0589367943964257	0.154598001228422	0.722419539684489
RP5-1085F17.3	Acute Lymphoblastic Leukemia	0.15608064013353	0.135502483535309	0.368477520090562			GATM	Acute lymphocytic leukaemia	-0.0431216	0.0862728809040916	0.666768656583937
RP5-1112D6.4	Acute Lymphoblastic Leukemia	-0.0651294	0.0800758257832995	0.427957632878886			CARD18	Acute lymphocytic leukaemia	0.0341821328663045	0.153393032646015	0.831052337023929
RP5-821D11.7	Acute Lymphoblastic Leukemia	0.109337697335751	0.0767215541690492	0.16954129512253			FABP9	Acute lymphocytic leukaemia	-0.0800046	0.090498333666024	0.410693474054135
RPA2	Acute Lymphoblastic Leukemia	-0.0447783	0.0456293699230469	0.332319686619036			CKMT2	Acute lymphocytic leukaemia	0.187866694180771	0.197854639006818	0.385959623589612
RPA3	Acute Lymphoblastic Leukemia	-0.0960095	0.143483361106689	0.572309026719843			HBQ1	Acute lymphocytic leukaemia	0.00757972761338732	0.206101518899581	0.971856127293074
RPAP1	Acute Lymphoblastic Leukemia	-0.0327647	0.0465157712177599	0.485729161992168			CD37	Acute lymphocytic leukaemia	0.702390064604871	0.80980777216575	0.434682861912268
RPAP3	Acute Lymphoblastic Leukemia	0.101993135263925	0.0433210432948728	0.0283658393187976			TCEA1	Acute lymphocytic leukaemia	0.0181027431285741	0.258589508801789	0.955505569807886
RPGRIP1	Acute Lymphoblastic Leukemia	-0.0945467	0.074623439513313	0.222244321595299			MAGEA6	Acute lymphocytic leukaemia	-0.863473	0.356625784370296	0.0940651812618474
RPL12	Acute Lymphoblastic Leukemia	-0.00446675	0.0515128618141062	0.931381504159338			ADH6	Acute lymphocytic leukaemia	0.216172008763224	0.327475925119609	0.545254475196409
RPL13A	Acute Lymphoblastic Leukemia	0.0331395756944493	0.0559236041676172	0.559785486198373			CCNB2	Acute lymphocytic leukaemia	-0.120951	0.10850480325467	0.301779854638671
RPL23AP53	Acute Lymphoblastic Leukemia	-0.108424	0.160481918113989	0.536331170320912			SPIN1	Acute lymphocytic leukaemia	-0.00373156	0.312449607379903	0.991043067976121
RPL28	Acute Lymphoblastic Leukemia	0.00604866991647329	0.0425508431523995	0.887656518649518			UBE2F	Acute lymphocytic leukaemia	0.0591589639735774	0.132998056995728	0.675051218937233
RPL7AP64	Acute Lymphoblastic Leukemia	-0.00548585	0.0746014248898468	0.942988430914338			GCLM	Acute lymphocytic leukaemia	-0.260046	0.252696288177548	0.490875005642412
RPP25L	Acute Lymphoblastic Leukemia	-0.069866	0.0692938326253427	0.324808363052717			THG1L	Acute lymphocytic leukaemia	0.0735019576841385	0.104970648024036	0.534210559715389
RPRM	Acute Lymphoblastic Leukemia	0.0478729564687167	0.0520568825243719	0.364246127331467			IL11RA	Acute lymphocytic leukaemia	0.0127660196607747	0.0521458751653167	0.810736975617755
RPS23	Acute Lymphoblastic Leukemia	-0.077049	0.0371040267052566	0.0408262578948942			CNRIP1	Acute lymphocytic leukaemia	0.01790242572492	0.0655011545814147	0.790173011821225
RPS6KA5	Acute Lymphoblastic Leukemia	0.0253463447876222	0.0681848278151258	0.714207181722603			SRA1	Acute lymphocytic leukaemia	-0.328287	0.332205833703507	0.503776810233341
RRAGD	Acute Lymphoblastic Leukemia	-0.00492211	0.0361669363404884	0.892226235043725			SH3GLB2	Acute lymphocytic leukaemia	-0.0915801	0.194816128478973	0.720250034553582
RREB1	Acute Lymphoblastic Leukemia	0.198584672633849	0.126562139593664	0.160621086548418			HEBP1	Acute lymphocytic leukaemia	-0.147963	0.0582650760325322	0.0441117378613426
RRN3P1	Acute Lymphoblastic Leukemia	0.00302821466095007	0.0522814453951136	0.95427172013392			PRND	Acute lymphocytic leukaemia	0.018848523410828	0.193360263450008	0.928493719224009
RRNAD1	Acute Lymphoblastic Leukemia	0.0190898291413213	0.322053739125761	0.955029003122677			PGP	Acute lymphocytic leukaemia	0.141899915128977	0.233527686387977	0.565701350428663
RSAD1	Acute Lymphoblastic Leukemia	0.0851265655772645	0.0916900592515525	0.370109619308062			OMP	Acute lymphocytic leukaemia	-0.0402671	0.179020272900799	0.842924437319191
RSBN1	Acute Lymphoblastic Leukemia	0.0866856685773725	0.144570982409567	0.591031970370512			CPOX	Acute lymphocytic leukaemia	-0.0283414	0.063778782052706	0.662726461941828
RSBN1L	Acute Lymphoblastic Leukemia	-0.0604708	0.141852834287566	0.679909347729522			SPA17	Acute lymphocytic leukaemia	-0.382639	0.265009581637843	0.385620383074283
RYBP	Acute Lymphoblastic Leukemia	-0.0828979	0.0644178650421588	0.206350782034672			CMPK1	Acute lymphocytic leukaemia	0.075948183101221	0.140428663033343	0.684378892258858
RYR1	Acute Lymphoblastic Leukemia	-0.0494779	0.0775699176931047	0.533866582595546			ANXA7	Acute lymphocytic leukaemia	-0.113764	0.139900929005326	0.565363667748234
S100A1	Acute Lymphoblastic Leukemia	-0.0422283	0.184685961108269	0.840393076977508			CYB5R1	Acute lymphocytic leukaemia	0.184947366678509	0.183520880326737	0.387800632645078
S100P	Acute Lymphoblastic Leukemia	-0.0302254	0.036892729366838	0.416945205960683			MEOX2	Acute lymphocytic leukaemia	0.165790196746525	0.133815340873825	0.270350990664096
S100Z	Acute Lymphoblastic Leukemia	0.023160907110651	0.0771786578650052	0.767543043720854			TAF10	Acute lymphocytic leukaemia	-0.0687382	0.13106705623099	0.614182403380621
SAMD3	Acute Lymphoblastic Leukemia	0.0384345281746836	0.0502089635859408	0.448259545383771			OXSM	Acute lymphocytic leukaemia	0.200794269604071	0.316122681151158	0.559830488519065
SAMM50	Acute Lymphoblastic Leukemia	-0.0252102	0.0343386470353512	0.467476125397855			CRIP1	Acute lymphocytic leukaemia	-0.00237573	0.0620402003218721	0.969958816151602
SARM1	Acute Lymphoblastic Leukemia	-0.0235001	0.0746505314226989	0.758319076457124			TCL1B	Acute lymphocytic leukaemia	0.307402283944517	0.197572761089404	0.363661731583766
SATB1	Acute Lymphoblastic Leukemia	-0.024831	0.103553553257787	0.816523476005229			TRIAP1	Acute lymphocytic leukaemia	0.121594028161454	0.128311327968164	0.443333299710432
SCCPDH	Acute Lymphoblastic Leukemia	0.0515494535778332	0.0452414769439655	0.263848708730517			GNG11	Acute lymphocytic leukaemia	0.0142239279760734	0.0989357852628784	0.890389814195717
SCFD2	Acute Lymphoblastic Leukemia	0.00908415545040555	0.105412090070585	0.936754753371952			SVIP	Acute lymphocytic leukaemia	0.276204953213709	0.177290359578726	0.217131019520719
SCMH1	Acute Lymphoblastic Leukemia	0.0222285337057469	0.158099885342858	0.893676114154973			CCL15	Acute lymphocytic leukaemia	-0.0240647	0.0819236646932193	0.773971524187065
SDHAF1	Acute Lymphoblastic Leukemia	-0.0165269	0.104028311702562	0.879989232372413			ANXA8	Acute lymphocytic leukaemia	0.363517916936468	0.227558261144173	0.356067981162396
SDHDP6	Acute Lymphoblastic Leukemia	0.0311897878615545	0.0435912675305725	0.479485380304047			GRHPR	Acute lymphocytic leukaemia	0.0156820907185153	0.14100196051148	0.929485607481314
SEC22A	Acute Lymphoblastic Leukemia	-0.0543455	0.129664185184279	0.692521723723153			MRAS	Acute lymphocytic leukaemia	0.124587233552581	0.167673780425119	0.593182388118335
SEMA4A	Acute Lymphoblastic Leukemia	0.0555189193769413	0.0498225233017061	0.271186064548042			CAPNS1	Acute lymphocytic leukaemia	-0.471189	0.9583631047569	0.709094502912919
SEPT11	Acute Lymphoblastic Leukemia	0.0632418099517833	0.0953409845882879	0.51789808806288			PURB	Acute lymphocytic leukaemia	0.0782458174353245	0.627056814485601	0.920969389449145
SEPW1	Acute Lymphoblastic Leukemia	0.0217034345929138	0.068405865742018	0.754026808888039			NAIF1	Acute lymphocytic leukaemia	-0.0293284	0.145945772936417	0.850539213574119
SERINC2	Acute Lymphoblastic Leukemia	0.0557522307333338	0.0723400179426608	0.446369631785023			ZWILCH	Acute lymphocytic leukaemia	-0.0800234	0.111231117296065	0.495184996219478
SERINC5	Acute Lymphoblastic Leukemia	0.00652742123561772	0.0533666815032619	0.903872087869356			BCCIP	Acute lymphocytic leukaemia	0.515567587065143	0.308622344845419	0.343389251562507
SERPINB2	Acute Lymphoblastic Leukemia	-0.138101	0.121627214201824	0.282669467268798			PALM	Acute lymphocytic leukaemia	0.155697797880592	0.121201620172195	0.255219866061994
SERPINB6	Acute Lymphoblastic Leukemia	-0.00152693	0.0339562964576816	0.964312287328288			PPA2	Acute lymphocytic leukaemia	0.080512089953803	0.315137531381487	0.822224290023304
SERPINH1	Acute Lymphoblastic Leukemia	-0.00663048	0.117185846570402	0.95599364971877			STXBP6	Acute lymphocytic leukaemia	0.0961776687747023	0.252215009457996	0.728361387579129
SETD3	Acute Lymphoblastic Leukemia	-0.0310003	0.0609393138362503	0.61626			DCTN6	Acute lymphocytic leukaemia	-0.0490703	0.311233314503781	0.889201192744261
SETD9	Acute Lymphoblastic Leukemia	0.0302363228282059	0.0538387548318762	0.581711576033605			NDRG3	Acute lymphocytic leukaemia	0.0864066058219682	0.278619650330162	0.785799122320973
SETDB1	Acute Lymphoblastic Leukemia	-0.146567	0.20340207218439	0.503440782734445			ASRGL1	Acute lymphocytic leukaemia	-0.152287	0.0848165590968792	0.147008167234989
SFI1	Acute Lymphoblastic Leukemia	0.0453183812933618	0.0379896739681519	0.240927776969323			RTP4	Acute lymphocytic leukaemia	0.00180920999617391	0.064209725065772	0.978307800967077
SFMBT1	Acute Lymphoblastic Leukemia	0.087593618096064	0.13589116395582	0.554300061191016			SH3GL3	Acute lymphocytic leukaemia	-0.509032	0.405189619997371	0.42799788782327
SFT2D1	Acute Lymphoblastic Leukemia	0.0842887274916069	0.057893429268715	0.156153867310746			MTHFD2	Acute lymphocytic leukaemia	0.0862741903420343	0.103385232826099	0.465236658255316
SGCE	Acute Lymphoblastic Leukemia	0.0827477033310042	0.0589576014287516	0.174422250667911			JMJD6	Acute lymphocytic leukaemia	-0.585103	0.327742650274709	0.325057397106179
SH2B3	Acute Lymphoblastic Leukemia	0.00858281520551923	0.118729228951089	0.943797342700536			SUOX	Acute lymphocytic leukaemia	-0.0322102	0.29709099599573	0.931247082239726
SH2D3C	Acute Lymphoblastic Leukemia	0.881219700591552	0.590113623474198	0.273926785094587			MAGEA8	Acute lymphocytic leukaemia	0.251016536880796	0.187274638950924	0.312097247464991
SH3BP1	Acute Lymphoblastic Leukemia	-0.0846344	0.0544481319420478	0.135770392788037			SNX5	Acute lymphocytic leukaemia	0.0378893117506827	0.103792914512532	0.739293757165217
SH3PXD2B	Acute Lymphoblastic Leukemia	0.0971482575535582	0.0761320705759635	0.219097558587737			PYCR2	Acute lymphocytic leukaemia	0.0680185502904699	0.105998362011443	0.555996159800583
SHE	Acute Lymphoblastic Leukemia	-0.288213	0.383545386449958	0.589746325545263			PGM2	Acute lymphocytic leukaemia	-0.292709	0.340824836785094	0.438856248349658
SHKBP1	Acute Lymphoblastic Leukemia	-0.006012	0.0335880524180281	0.858546858681094			CPLX1	Acute lymphocytic leukaemia	0.34453253342288	0.269920547734246	0.329983254545272
SHROOM1	Acute Lymphoblastic Leukemia	-0.00494717	0.0575662202388995	0.932651667966952			IDH1	Acute lymphocytic leukaemia	-0.0398492	0.31920693761458	0.912068070328152
SIGLEC14	Acute Lymphoblastic Leukemia	0.037491406236073	0.0330622988749876	0.260975205135919			PSMB3	Acute lymphocytic leukaemia	0.0443730583233467	1.00059254808181	0.971786448132254
SIL1	Acute Lymphoblastic Leukemia	0.0235859104534383	0.298087098693867	0.941916141850089			PSMB4	Acute lymphocytic leukaemia	-0.0183432	0.0795364283553293	0.832437671150724
SIRT1	Acute Lymphoblastic Leukemia	0.0673316602801489	0.0596802968607492	0.268480557443473			PSAT1	Acute lymphocytic leukaemia	-0.0516486	0.122923451310813	0.715199628127296
SIX5	Acute Lymphoblastic Leukemia	-0.230588	0.127998440022312	0.169427123235027			DECR2	Acute lymphocytic leukaemia	-0.101633	0.0616550883208544	0.150364601183897
SKAP2	Acute Lymphoblastic Leukemia	-0.0435326	0.0294970635030367	0.144232675467082			HNRNPD	Acute lymphocytic leukaemia	0.362329527342738	0.278625292060359	0.417329740966507
SLAMF1	Acute Lymphoblastic Leukemia	-0.15188	0.155018742951197	0.3650450361225			MYL3	Acute lymphocytic leukaemia	0.0693992510651033	0.134165687232086	0.623479378774588
SLBP	Acute Lymphoblastic Leukemia	0.118513709813606	0.0932717040507608	0.232624658422887			ALB	Acute lymphocytic leukaemia	-0.124637	0.078207807631785	0.142096051223387
SLC11A2	Acute Lymphoblastic Leukemia	-0.00136317	0.0964991981134647	0.989616226094198			ALDH2	Acute lymphocytic leukaemia	0.0702656955612762	0.21826994342208	0.760535981484969
SLC12A9	Acute Lymphoblastic Leukemia	0.0621170909433168	0.146483412542255	0.684252684480103			COMT	Acute lymphocytic leukaemia	0.196490311950473	0.115878038216226	0.165192148118312
SLC13A4	Acute Lymphoblastic Leukemia	-0.0679585	0.0724083097615254	0.363875423572506			PSMD10	Acute lymphocytic leukaemia	0.0379121807677742	0.463361575923274	0.942241205536589
SLC16A1	Acute Lymphoblastic Leukemia	-0.169676	0.206341655471514	0.45709384286382			GLRX	Acute lymphocytic leukaemia	0.939570267531474	0.676208969137659	0.397139725521272
SLC16A3	Acute Lymphoblastic Leukemia	0.0392195736016844	0.0655993184884833	0.557377618741473			IFNA1	Acute lymphocytic leukaemia	0.353860962395062	0.281645294253113	0.427966789299451
SLC16A6	Acute Lymphoblastic Leukemia	-0.0616045	0.0627089376517459	0.337092054858728			MAT2B	Acute lymphocytic leukaemia	-0.0135822	0.0576879858521576	0.818191654672163
SLC17A3	Acute Lymphoblastic Leukemia	-0.00153101	0.0440036779895325	0.972475545674699			ADPRH	Acute lymphocytic leukaemia	0.0743198062573487	0.171927039017807	0.707685939581051
SLC17A9	Acute Lymphoblastic Leukemia	-0.158762	0.0746548894588722	0.053176226223781			AKR1C4	Acute lymphocytic leukaemia	-0.0566587	0.0776261495399091	0.484019960553737
SLC23A3	Acute Lymphoblastic Leukemia	-0.0532098	0.0563907193276781	0.353745649932959			AKAP7	Acute lymphocytic leukaemia	0.0850432675588523	0.118403069999903	0.504753999034574
SLC24A1	Acute Lymphoblastic Leukemia	-0.259783	0.175445055790745	0.276842656327888			ALKBH3	Acute lymphocytic leukaemia	-0.0607499	0.0941233334049849	0.553806647941266
SLC25A19	Acute Lymphoblastic Leukemia	-1.20707	0.660750815824523	0.209255807999546			AMPD2	Acute lymphocytic leukaemia	-0.311905	0.552972587443063	0.673053036946149
SLC25A22	Acute Lymphoblastic Leukemia	-0.193305	0.195105182679277	0.42621764512095			ANKRD54	Acute lymphocytic leukaemia	0.263228182645632	0.199978410061888	0.413605371075119
SLC25A34	Acute Lymphoblastic Leukemia	-0.0878501	0.0533553414373377	0.109446480228487			ARF4	Acute lymphocytic leukaemia	-0.156019	0.1197889219621	0.240520116881938
SLC25A46	Acute Lymphoblastic Leukemia	0.125885317606128	0.127322744600008	0.360984543464758			ARF5	Acute lymphocytic leukaemia	-0.147273	0.126265487001947	0.296063628288118
SLC29A4	Acute Lymphoblastic Leukemia	-0.000832478	0.0926737678651117	0.992980404423292			ARL15	Acute lymphocytic leukaemia	-0.00861225	0.1540933216105	0.964456394043398
SLC2A6	Acute Lymphoblastic Leukemia	0.231209824749843	0.200194701356372	0.454309872489062			ARL5A	Acute lymphocytic leukaemia	0.513919932728834	0.434057477415281	0.446494243538875
SLC35A1	Acute Lymphoblastic Leukemia	0.115871345068507	0.135667023567395	0.421320999967688			AS3MT	Acute lymphocytic leukaemia	0.447890147492131	0.284122977950133	0.359881682347087
SLC35B4	Acute Lymphoblastic Leukemia	0.094444371330435	0.0649678420552417	0.16973960696931			ARPC5	Acute lymphocytic leukaemia	-0.0845347	0.410151787476835	0.870600954088209
SLC35C1	Acute Lymphoblastic Leukemia	0.0975922469544693	0.0697725006317161	0.17889099132095			CDH1	Acute lymphocytic leukaemia	-0.016841	0.145310980349447	0.926546026471483
SLC35D1	Acute Lymphoblastic Leukemia	-0.0579914	0.080942787181806	0.487423437113118			RALB	Acute lymphocytic leukaemia	0.0329323465040453	0.229637786738691	0.899111245978662
SLC35D2	Acute Lymphoblastic Leukemia	-0.0314145	0.0841815126249645	0.721846773327367			TBPL1	Acute lymphocytic leukaemia	-0.0287951	0.0782123882342307	0.725389296367323
SLC35E3	Acute Lymphoblastic Leukemia	-0.003785	0.0543466511271946	0.944970790301242			UBXN2B	Acute lymphocytic leukaemia	-0.539654	0.780295935148809	0.614802291263824
SLC35E4	Acute Lymphoblastic Leukemia	0.190565023343879	0.0947966385053749	0.137949979234187			PPIG	Acute lymphocytic leukaemia	-0.0921249	0.189386309275372	0.643912519427865
SLC37A1	Acute Lymphoblastic Leukemia	-0.00403521	0.0653653787271985	0.951359094482912			PTGES2	Acute lymphocytic leukaemia	-0.00714417	0.183173400915212	0.97133893545658
SLC37A3	Acute Lymphoblastic Leukemia	0.0296135568107889	0.0779479676241407	0.708454411809518			PPIC	Acute lymphocytic leukaemia	0.141230828747471	0.118375088610712	0.257937035710718
SLC41A3	Acute Lymphoblastic Leukemia	-0.0796547	0.0450303049281317	0.0815997664518325			ITLN1	Acute lymphocytic leukaemia	0.0175194741372877	0.0916734543361937	0.854744264022833
SLC48A1	Acute Lymphoblastic Leukemia	0.000857810724133635	0.0441764023493384	0.984604310041188			LRIG1	Acute lymphocytic leukaemia	-0.0374389	0.0430936885430964	0.398655479716772
SLC51A	Acute Lymphoblastic Leukemia	-0.0926512	0.108950474383815	0.423234919812327			SAA2	Acute lymphocytic leukaemia	0.0150415679950636	0.0636172300049258	0.817437389829684
SLC5A11	Acute Lymphoblastic Leukemia	-0.0736478	0.0469578595745257	0.131064499599483			SGTB	Acute lymphocytic leukaemia	0.123152833628254	0.27592288651928	0.699029983307389
SLC5A6	Acute Lymphoblastic Leukemia	0.0412228639099428	0.0560279105960481	0.468465397052187			TG	Acute lymphocytic leukaemia	-0.0986698	0.13523098476631	0.498343655867992
SLC6A12	Acute Lymphoblastic Leukemia	0.0422994203345129	0.0608059352884579	0.494277560566379			SH2D1B	Acute lymphocytic leukaemia	-0.166734	0.212066525267586	0.461642593793351
SLC6A16	Acute Lymphoblastic Leukemia	0.0383530623297551	0.137680649604163	0.791731695713167			SERPINB13	Acute lymphocytic leukaemia	0.0790456752664581	0.118505659748562	0.526127875549659
SLC7A10	Acute Lymphoblastic Leukemia	0.48162633806471	0.52080247739815	0.452709488259442			UBE2D2	Acute lymphocytic leukaemia	0.0406212989988479	0.135563925721571	0.776503224971804
SLC7A7	Acute Lymphoblastic Leukemia	-0.0426578	0.0488353935726853	0.391418997850461			PRSS3	Acute lymphocytic leukaemia	-0.0416874	0.032223649676368	0.204754368170577
SLC7A8	Acute Lymphoblastic Leukemia	0.0631835543176173	0.0456871888534636	0.17688476274526			PPP3R2	Acute lymphocytic leukaemia	-0.0739678	0.109604933844165	0.518789774538247
SLC9A3R1	Acute Lymphoblastic Leukemia	-0.0796817	0.093714348985907	0.411823744563342			CD3E	Acute lymphocytic leukaemia	0.061426881703742	0.121381912219875	0.630863802114195
SLX4IP	Acute Lymphoblastic Leukemia	0.0514453505226561	0.14835779420705	0.740605654956256			AIF1L	Acute lymphocytic leukaemia	0.00966433193413745	0.0746472795048968	0.903237613376611
SMAD5	Acute Lymphoblastic Leukemia	0.0824134938172283	0.0526204546822719	0.12325656147008			CEACAM8	Acute lymphocytic leukaemia	-0.0127064	0.0453850614478118	0.782526064367254
SMC1B	Acute Lymphoblastic Leukemia	-0.0575183	0.160117381495734	0.728723082666003			COL2A1	Acute lymphocytic leukaemia	-0.017785	0.046652049312985	0.707264560251795
SMC2	Acute Lymphoblastic Leukemia	-0.118428	0.0812834888129201	0.16885016903872			CHST4	Acute lymphocytic leukaemia	0.0317136764277615	0.142713861950487	0.844772355425732
SMC4	Acute Lymphoblastic Leukemia	-0.121335	0.1407577568176	0.42807866325285			GREM1	Acute lymphocytic leukaemia	-0.0389929	0.0572160878631905	0.507513373906375
SMG9	Acute Lymphoblastic Leukemia	0.203429888670323	0.308924001840802	0.557236517073331			COL3A1	Acute lymphocytic leukaemia	0.00312183915008479	0.0503549587789661	0.951586147272523
SMIM16	Acute Lymphoblastic Leukemia	-0.449433	0.312871907536854	0.387151718016256			CLSTN2	Acute lymphocytic leukaemia	0.0328807115851038	0.0753496471684639	0.671005865023727
SMIM7	Acute Lymphoblastic Leukemia	0.0343539216492888	0.189526337381763	0.867716752427552			DNAJB4	Acute lymphocytic leukaemia	0.0136317220406159	0.080068635395698	0.868208333567981
SMPD2	Acute Lymphoblastic Leukemia	0.00726218598734073	0.0778312730764847	0.926324301421585			FABP12	Acute lymphocytic leukaemia	0.207036207451918	0.127668287606148	0.246330274612169
SMPD4	Acute Lymphoblastic Leukemia	0.0970655930315808	0.111447852761155	0.447872901998025			FGB	Acute lymphocytic leukaemia	-0.132917	0.0926224626988593	0.174893943759677
SNHG5	Acute Lymphoblastic Leukemia	-0.00784945	0.0554721106040013	0.88845135772397			GBP2	Acute lymphocytic leukaemia	0.100519706677877	0.116479940156799	0.421299467807002
SNORA16	Acute Lymphoblastic Leukemia	-0.101387	0.0513646690264996	0.0600149070455642			GSTM4	Acute lymphocytic leukaemia	-0.0238847	0.0648330731936159	0.71850217374857
SNORA45	Acute Lymphoblastic Leukemia	0.100721401053719	0.437982749383602	0.856100592939597			HS6ST3	Acute lymphocytic leukaemia	-0.059458	0.111031303313501	0.615252077357938
SOD2	Acute Lymphoblastic Leukemia	-0.0434137	0.0326375877259719	0.195468816227083			HDAC2	Acute lymphocytic leukaemia	0.0386186117038146	0.145809959018498	0.801692351027377
SORBS1	Acute Lymphoblastic Leukemia	0.265469975262395	0.297459922834997	0.536138696936946			HSPA1B	Acute lymphocytic leukaemia	0.0116425228930825	0.323782176228919	0.973574762442741
SOS2	Acute Lymphoblastic Leukemia	0.0722081731092014	0.201521815003127	0.732377467710449			KIR3DL1	Acute lymphocytic leukaemia	0.18044793001674	0.278582149950534	0.634082017460441
SOX4	Acute Lymphoblastic Leukemia	-0.101504	0.128946056566938	0.466830678026481			EXOSC8	Acute lymphocytic leukaemia	0.147844887115207	0.163311066863131	0.531617518460667
SP1	Acute Lymphoblastic Leukemia	0.0348535590439277	0.078623262310021	0.666986566648506			LIN7A	Acute lymphocytic leukaemia	0.207648962872583	0.138577651642722	0.374641768860831
SPAG1	Acute Lymphoblastic Leukemia	-0.0139841	0.0613552177073136	0.821114536039669			ITPA	Acute lymphocytic leukaemia	0.316377447938453	0.191839195741013	0.14309880880385
SPATA24	Acute Lymphoblastic Leukemia	-0.0795138	0.134128315779538	0.56789724119268			AMY2A	Acute lymphocytic leukaemia	-0.0600176	0.0413578833983501	0.162235783234351
SPATA32	Acute Lymphoblastic Leukemia	-0.102081	0.0777455858156545	0.210293955389926			PDE4A	Acute lymphocytic leukaemia	0.144658337651248	0.105580117024765	0.228964967728165
SPATA7	Acute Lymphoblastic Leukemia	-0.00654215	0.0642596968809979	0.92003463557803			PHEX	Acute lymphocytic leukaemia	-0.24536	0.381320117936891	0.636009067949036
SPATC1	Acute Lymphoblastic Leukemia	0.266179314096882	0.168806105106374	0.175658690483017			CD68	Acute lymphocytic leukaemia	-0.0734157	0.0948137650259503	0.46408976777283
SPCS3	Acute Lymphoblastic Leukemia	0.00546203719644676	0.0791839607444396	0.946935371031382			PSMA5	Acute lymphocytic leukaemia	-0.101012	0.0679443452541211	0.1712665237373
SPDYE6	Acute Lymphoblastic Leukemia	-0.0823953	0.0848207082185503	0.344219738719907			RAET1G	Acute lymphocytic leukaemia	-0.0367425	0.126460263052001	0.778788264638324
SPECC1L	Acute Lymphoblastic Leukemia	-0.0308287	0.0720488679844525	0.678790767925596			SLIT2	Acute lymphocytic leukaemia	-0.033562	0.126548488119951	0.79972359555282
SPEF2	Acute Lymphoblastic Leukemia	0.00871945401595652	0.0912082110347813	0.926517955233619			SLIT3	Acute lymphocytic leukaemia	0.00877751456421006	0.188953557438706	0.964456519228317
SPIRE1	Acute Lymphoblastic Leukemia	0.0646843581833236	0.0383775349261548	0.0988204274243565			NMNAT1	Acute lymphocytic leukaemia	0.0605865766264456	0.147016150964056	0.751144825082803
SPRYD4	Acute Lymphoblastic Leukemia	0.0240812257901521	0.0388777293930601	0.539658264890136			TGM4	Acute lymphocytic leukaemia	-0.081149	0.231471451574017	0.759386321240214
SPSB1	Acute Lymphoblastic Leukemia	0.0595006952452276	0.0640989529542068	0.366264380285771			TGM2	Acute lymphocytic leukaemia	-0.0959459	0.327735602430841	0.788791061950309
SPTBN1	Acute Lymphoblastic Leukemia	-0.0133794	0.0439752949068426	0.76290837006621			TLR5	Acute lymphocytic leukaemia	0.0429340595036793	0.071967920319601	0.565494981425657
SPTBN5	Acute Lymphoblastic Leukemia	0.127260102373449	0.0747979614119982	0.103631986976185			VLDLR	Acute lymphocytic leukaemia	-0.059326	0.0843329662263842	0.504479685961671
SPTLC2	Acute Lymphoblastic Leukemia	0.0109455034992938	0.0381265483645697	0.775460010086223			PSMB9	Acute lymphocytic leukaemia	0.0463049951173052	0.063559063195113	0.489935300844862
SRBD1	Acute Lymphoblastic Leukemia	0.0339280866292031	0.0589202352189217	0.56949849768709			PTGR2	Acute lymphocytic leukaemia	0.41735682908998	0.177345295948657	0.078227995575805
SRD5A3-AS1	Acute Lymphoblastic Leukemia	0.0250233403592374	0.056928147003425	0.666964836224245			RGS1	Acute lymphocytic leukaemia	-0.0145452	0.188319644334681	0.950926838197925
SRI	Acute Lymphoblastic Leukemia	-0.309373	0.122664382713501	0.053037945277054			LRRC3B	Acute lymphocytic leukaemia	0.0502865679275689	0.222754887467358	0.835902240326127
SRPK2	Acute Lymphoblastic Leukemia	0.0713586468879526	0.200745154934807	0.736742738057005			RAC2	Acute lymphocytic leukaemia	0.275771668248611	0.48235534015336	0.669362000039274
SSH2	Acute Lymphoblastic Leukemia	0.0647895612946766	0.051111199141132	0.214684847710931			TCEAL8	Acute lymphocytic leukaemia	0.111831650077362	0.287060264727003	0.734420945412677
ST6GALNAC3	Acute Lymphoblastic Leukemia	0.00142223155661909	0.0520524991196619	0.978389256305655			MEMO1	Acute lymphocytic leukaemia	-0.0129234	0.150032207136055	0.936783944399994
ST7L	Acute Lymphoblastic Leukemia	-0.128164	0.0638063408163118	0.052570513800153			SH3BGRL2	Acute lymphocytic leukaemia	-0.36693	0.339181332615963	0.392425175805722
ST8SIA1	Acute Lymphoblastic Leukemia	-0.0128958	0.0930389188825678	0.891735109708183			TK2	Acute lymphocytic leukaemia	0.0442091103254681	0.258152098182472	0.892024883711294
STAG3	Acute Lymphoblastic Leukemia	0.0441454187749757	0.040541726310335	0.28256226268936			PPP1R14A	Acute lymphocytic leukaemia	0.316773563543685	0.627315743337691	0.702308271532974
STAP1	Acute Lymphoblastic Leukemia	0.0791437769753349	0.113863220271667	0.509414350427352			UBQLN2	Acute lymphocytic leukaemia	0.650561139785711	0.525388856558834	0.432490137856755
STK10	Acute Lymphoblastic Leukemia	0.0918551477432325	0.176382890822673	0.618588445407082			NFKBID	Acute lymphocytic leukaemia	0.0390769245572875	0.125118960652212	0.784353780234502
STK33	Acute Lymphoblastic Leukemia	0.0539690025499134	0.0759834991167087	0.490081253255146			UBLCP1	Acute lymphocytic leukaemia	0.0529251384782143	0.0826381186356335	0.539789993108253
STK36	Acute Lymphoblastic Leukemia	0.0545533361346402	0.406965354803778	0.905635941081999			HSPB6	Acute lymphocytic leukaemia	-0.00872673	0.304765380465473	0.978527965938286
STK38L	Acute Lymphoblastic Leukemia	-0.205618	0.16262335996303	0.274747542595645			MTHFSD	Acute lymphocytic leukaemia	-0.0463673	0.323494398533382	0.89295805894715
STPG1	Acute Lymphoblastic Leukemia	0.972079940795377	0.911304843928439	0.479463990791366			SERPINB8	Acute lymphocytic leukaemia	0.376373534079116	0.204512691232546	0.207077304007068
SUCLA2	Acute Lymphoblastic Leukemia	0.00484846222972038	0.0798517333444233	0.952583081400695			TIAL1	Acute lymphocytic leukaemia	0.415701398425313	0.239934067900809	0.225311351382041
SUCLG2	Acute Lymphoblastic Leukemia	0.0820443945551245	0.049512189908103	0.103417265024089			ALDH6A1	Acute lymphocytic leukaemia	0.160697953056337	0.351767586127839	0.692612081878719
SUPT20H	Acute Lymphoblastic Leukemia	-0.0446276	0.0521516505883864	0.410400980123255			DAP	Acute lymphocytic leukaemia	-0.048257	0.0536080150564346	0.391473447107216
SUPT3H	Acute Lymphoblastic Leukemia	-0.0645874	0.0494970150330031	0.199392608915563			CYB5R2	Acute lymphocytic leukaemia	-0.120011	0.0875413215834624	0.219471466725462
SUPV3L1	Acute Lymphoblastic Leukemia	-0.0244082	0.0575572607699436	0.674445070498908			MREG	Acute lymphocytic leukaemia	-0.073655	0.097771594021806	0.470494128174464
SURF6	Acute Lymphoblastic Leukemia	-0.0582071	0.0796881344985478	0.477169727394882			TIMM8A	Acute lymphocytic leukaemia	-0.316849	0.525077493345845	0.654353604259261
SUZ12P	Acute Lymphoblastic Leukemia	0.0149788014605762	0.0801400878681248	0.855470555702853			MPPED2	Acute lymphocytic leukaemia	0.0885437786852947	0.132084945022705	0.571671432550873
SYDE2	Acute Lymphoblastic Leukemia	0.184208754649057	0.178231944337528	0.489502804771172			SERPINE2	Acute lymphocytic leukaemia	-0.0259607	0.0697982893116646	0.720942120192001
SYK	Acute Lymphoblastic Leukemia	-0.00536224	0.0370015394470628	0.88534565657646			USP15	Acute lymphocytic leukaemia	0.0241055548464962	0.109913671040209	0.846753696554503
SYN2	Acute Lymphoblastic Leukemia	0.089739272294382	0.0959050242098293	0.369510448417013			RPS19	Acute lymphocytic leukaemia	-0.00783698	0.107705466341973	0.945487813788715
SYTL1	Acute Lymphoblastic Leukemia	-0.100889	0.115518290064691	0.47456354063957			FIBP	Acute lymphocytic leukaemia	-0.212198	0.515545354595832	0.75142170783786
SYTL2	Acute Lymphoblastic Leukemia	0.025858842393846	0.0446118803644902	0.565407899389052			POLE3	Acute lymphocytic leukaemia	0.219276537471988	0.401261412741776	0.639562071521038
TACC1	Acute Lymphoblastic Leukemia	0.0255809023103107	0.0490498138592931	0.605704635302818			ZFAND1	Acute lymphocytic leukaemia	-0.107717	0.133418866058529	0.478534402169091
TAF1D	Acute Lymphoblastic Leukemia	0.0193187159640191	0.0579325952518383	0.743396231326909			MARCKSL1	Acute lymphocytic leukaemia	0.0847166257312684	0.0942704287885646	0.392243963186744
TANK	Acute Lymphoblastic Leukemia	0.00618595509956112	0.061011061155219	0.919989515716203			GULP1	Acute lymphocytic leukaemia	0.00573776669068036	0.0889476916795966	0.950369890833855
TAPBP	Acute Lymphoblastic Leukemia	0.207827356305641	0.139809757280558	0.211344484768262			RPL12	Acute lymphocytic leukaemia	0.159239184347272	0.162818352016457	0.507074745500104
TAPT1	Acute Lymphoblastic Leukemia	-0.0097809	0.0640079120349404	0.879827364358889			STAMBP	Acute lymphocytic leukaemia	-0.0972802	0.183156159788719	0.648411041106503
TBC1D2B	Acute Lymphoblastic Leukemia	0.104016127964957	0.0626209566240381	0.114022852832339			NAP1L4	Acute lymphocytic leukaemia	0.096222274147299	0.109394480793472	0.540727439432644
TBC1D30	Acute Lymphoblastic Leukemia	-0.0581385	0.0736610218284764	0.43737583975635			UBE2L6	Acute lymphocytic leukaemia	0.062068781138854	0.412758166222301	0.904979839082065
TBC1D3F	Acute Lymphoblastic Leukemia	0.102854109320151	0.106491382350938	0.359356436722732			VBP1	Acute lymphocytic leukaemia	-0.18807	0.122727153965617	0.169281645876662
TBC1D9B	Acute Lymphoblastic Leukemia	0.0542396678837455	0.0381459855641461	0.161521704213256			DTD1	Acute lymphocytic leukaemia	-0.0677811	0.164022102059122	0.750527327965099
TBCK	Acute Lymphoblastic Leukemia	-0.0399666	0.0637636878636406	0.539637000659352			RPS5	Acute lymphocytic leukaemia	0.103070069484926	0.198687412550891	0.655622506744719
TBKBP1	Acute Lymphoblastic Leukemia	-0.0553093	0.0338361523156608	0.107738201301795			HOPX	Acute lymphocytic leukaemia	-0.0145911	0.184933594725046	0.94987514764473
TBPL1	Acute Lymphoblastic Leukemia	-0.129763	0.17934790274631	0.5216695734887			ACAT1	Acute lymphocytic leukaemia	-0.141086	0.148330151771056	0.515931619829444
TCF19	Acute Lymphoblastic Leukemia	-0.0448286	0.0486987021830216	0.368267090126665			NUDT1	Acute lymphocytic leukaemia	1.19055680230491	2.05111700079182	0.665191905061069
TCL1A	Acute Lymphoblastic Leukemia	0.0179508832015194	0.0608155541622457	0.774560557358005			ADK	Acute lymphocytic leukaemia	-0.0717076	0.206904343389165	0.746375397627376
TCTEX1D1	Acute Lymphoblastic Leukemia	-0.0345357	0.0677866929945564	0.614886877556092			ACVR2A	Acute lymphocytic leukaemia	0.166695952776391	0.186703186852794	0.422403756392255
TCTEX1D2	Acute Lymphoblastic Leukemia	-0.0577668	0.0587376468442403	0.334106500116558			SPINK4	Acute lymphocytic leukaemia	0.0549885574861824	0.0897345889496919	0.559388439826647
TCTN2	Acute Lymphoblastic Leukemia	-0.0150074	0.0626996676640394	0.813046723042798			NDRG1	Acute lymphocytic leukaemia	0.371490333576805	0.305158852001638	0.437791337769974
TEFM	Acute Lymphoblastic Leukemia	0.0750553342480845	0.0543325845582777	0.185042339216319			EIF1AY	Acute lymphocytic leukaemia	0.233301530481454	0.189251573042942	0.433873055973961
TEK	Acute Lymphoblastic Leukemia	0.0424651868816797	0.0372530535939653	0.259354144984565			BATF	Acute lymphocytic leukaemia	0.396977369817087	0.288262564750867	0.302346724444266
TF	Acute Lymphoblastic Leukemia	-0.0574887	0.127329216070109	0.675028721732025			HOMER1	Acute lymphocytic leukaemia	-0.0161172	0.0529024803243636	0.76584507302535
TFDP2	Acute Lymphoblastic Leukemia	0.234589102496199	0.291309224937244	0.465794533692727			DDT	Acute lymphocytic leukaemia	0.0869121031813237	0.100139397215804	0.410720790978988
TFRC	Acute Lymphoblastic Leukemia	-0.0330928	0.0442303438121362	0.459642874577692			GLUL	Acute lymphocytic leukaemia	-0.00469321	0.270890984276354	0.988971621413295
TGFA	Acute Lymphoblastic Leukemia	-0.0745202	0.102470017673984	0.494465581451249			ARF1	Acute lymphocytic leukaemia	-0.324895	0.251668194007051	0.287198956278713
TGM1	Acute Lymphoblastic Leukemia	-0.0415007	0.0602708909293792	0.502346176403437			RBP5	Acute lymphocytic leukaemia	0.0951091372454867	0.0911586814676527	0.355696427306914
TGM2	Acute Lymphoblastic Leukemia	-0.317885	0.308562223895579	0.411194657694429			PFDN2	Acute lymphocytic leukaemia	0.0566804206826479	0.349912890737224	0.886203790954792
TGM3	Acute Lymphoblastic Leukemia	-0.089365	0.0641736014014847	0.191263225258813			UBE2D1	Acute lymphocytic leukaemia	0.0676659810761935	0.0896220558136926	0.478818214222369
THBS3	Acute Lymphoblastic Leukemia	-0.0423958	0.044396509763331	0.343714319542808			MYCBP	Acute lymphocytic leukaemia	-1.11835	0.828171247159118	0.309401566148387
THNSL1	Acute Lymphoblastic Leukemia	0.109243676567323	0.170486556565204	0.549878383128073			SRGN	Acute lymphocytic leukaemia	0.0132290408227736	0.0678470158052613	0.849736604139507
THOC7	Acute Lymphoblastic Leukemia	-0.0807772	0.134611102995206	0.580793993444152			GMPR	Acute lymphocytic leukaemia	0.0119407711489771	0.158262092651426	0.941100449183943
TIGD3	Acute Lymphoblastic Leukemia	-0.428772	0.173802160445202	0.0903032734861806			EIF2S1	Acute lymphocytic leukaemia	1.16403226905862	0.521945074925596	0.268346416572392
TINCR	Acute Lymphoblastic Leukemia	0.100184277517666	0.291288551774188	0.789112467171938			SDCBP2	Acute lymphocytic leukaemia	0.151959376817447	0.143473134476308	0.34925170221236
TIPRL	Acute Lymphoblastic Leukemia	0.0553863461988873	0.108292338496033	0.621345607722425			RPA2	Acute lymphocytic leukaemia	0.381700276588945	0.246037463124031	0.364501501576374
TJP2	Acute Lymphoblastic Leukemia	0.021781460737424	0.0376809831340829	0.565140352329045			G3BP1	Acute lymphocytic leukaemia	0.38215279421857	0.242857396989425	0.213648328145452
TLR1	Acute Lymphoblastic Leukemia	0.0150619462034421	0.109305426551247	0.912824778829379			PEF1	Acute lymphocytic leukaemia	-0.0603634	0.0459616589803676	0.200540647482726
TM4SF19-AS1	Acute Lymphoblastic Leukemia	-0.0988074	0.119223765919013	0.434587187874714			GSR	Acute lymphocytic leukaemia	0.209255258761003	0.14541540274546	0.223546855580063
TM4SF19	Acute Lymphoblastic Leukemia	-0.0850153	0.0722763219152716	0.266735308932937			SNTA1	Acute lymphocytic leukaemia	0.168956527902182	0.2373215341981	0.515828398610175
TMBIM6	Acute Lymphoblastic Leukemia	0.159695139344644	0.538453869126541	0.794750511345768			TSTD1	Acute lymphocytic leukaemia	-0.0170816	0.101827154026385	0.874919100381363
TMED8	Acute Lymphoblastic Leukemia	-0.0927569	0.344144744197677	0.832395494900219			RBP1	Acute lymphocytic leukaemia	0.315455704173941	0.300340433803945	0.403760693937207
TMEM109	Acute Lymphoblastic Leukemia	-0.0371925	0.0695281988356323	0.60173093733797			UBE2D3	Acute lymphocytic leukaemia	0.0165005251769968	0.138377563696732	0.912619808364752
TMEM110	Acute Lymphoblastic Leukemia	-0.0535994	0.065242756151776	0.4234127989097			MAFG	Acute lymphocytic leukaemia	0.198459797627392	1.38268071276481	0.909244142096449
TMEM119	Acute Lymphoblastic Leukemia	0.0525127565509211	0.0393344522948631	0.192252145416722			RAB13	Acute lymphocytic leukaemia	-0.110823	0.302578752233306	0.738476474277519
TMEM129	Acute Lymphoblastic Leukemia	0.0373504398900419	0.173952077826503	0.840490625532756			UROD	Acute lymphocytic leukaemia	0.142242186960205	0.104055599140125	0.305001708192852
TMEM143	Acute Lymphoblastic Leukemia	0.211253657956318	0.162420274888304	0.417272503149686			VPS26A	Acute lymphocytic leukaemia	-0.104066	0.074049559304167	0.20271055067841
TMEM173	Acute Lymphoblastic Leukemia	0.045527722430378	0.0760583475438087	0.562759275832859			CRIPT	Acute lymphocytic leukaemia	0.217222208118749	0.0934581232937769	0.0807573463231798
TMEM177	Acute Lymphoblastic Leukemia	0.0202108058290018	0.207510947576487	0.926195368821415			MYL7	Acute lymphocytic leukaemia	0.0594147333322746	0.0906724911656509	0.530682501096534
TMEM200A	Acute Lymphoblastic Leukemia	-0.0110234	0.0713401947100247	0.879999067715276			G6PD	Acute lymphocytic leukaemia	0.294980483320146	0.423542188298065	0.6127145039788
TMEM245	Acute Lymphoblastic Leukemia	-0.0341206	0.0354840795279854	0.341517392979997			PET117	Acute lymphocytic leukaemia	-0.00479491	0.125992173985523	0.9714656991518
TMEM254	Acute Lymphoblastic Leukemia	-0.0298511	0.0449628931624327	0.512827629493805			COPE	Acute lymphocytic leukaemia	-0.115374	0.133387794074382	0.426608460716654
TMEM258	Acute Lymphoblastic Leukemia	0.0643008718198046	0.0657894096577161	0.340665200649523			HSCB	Acute lymphocytic leukaemia	-0.0916358	0.0893958479008116	0.335330148633898
TMEM5	Acute Lymphoblastic Leukemia	0.0792554908145656	0.100190097880484	0.44563553931481			EBAG9	Acute lymphocytic leukaemia	0.00794638373516626	0.101378789415393	0.939716890733744
TMEM50A	Acute Lymphoblastic Leukemia	0.0301582950725889	0.0407226262864535	0.4641862652054			HAT1	Acute lymphocytic leukaemia	-0.0224372	0.125562520585426	0.864059741378059
TMEM63B	Acute Lymphoblastic Leukemia	-0.103773	0.113058064340452	0.426373179195247			LZIC	Acute lymphocytic leukaemia	-0.0604463	0.344093797230021	0.889295755114316
TMEM70	Acute Lymphoblastic Leukemia	-0.217202	0.101496903908755	0.0647778871150545			ACBD6	Acute lymphocytic leukaemia	-0.106116	0.11505221674173	0.525707689397045
TMEM71	Acute Lymphoblastic Leukemia	0.0142086957813279	0.0518111232246501	0.786348036938181			OSTM1	Acute lymphocytic leukaemia	0.192724029940428	0.322808748266502	0.611077758965781
TMEM86A	Acute Lymphoblastic Leukemia	-0.207911	0.30297687810717	0.617122755180207			TOM1L2	Acute lymphocytic leukaemia	-0.11715	0.0988268041426858	0.26621211899547
TMEM86B	Acute Lymphoblastic Leukemia	0.0970984350355278	0.0812082180193689	0.266060206140705			LRRTM1	Acute lymphocytic leukaemia	-0.0375295	0.114498920135739	0.759522589633949
TMEM9	Acute Lymphoblastic Leukemia	0.0364878219880336	0.0422984641414242	0.391419510910612			MATN3	Acute lymphocytic leukaemia	0.0702395872055197	0.0728818877529917	0.363397036983948
TMEM9B	Acute Lymphoblastic Leukemia	-0.00174539	0.0534968678944108	0.974376353991427			PCNA	Acute lymphocytic leukaemia	-0.312119	0.229005708431458	0.40297732094243
TMTC4	Acute Lymphoblastic Leukemia	0.0569905776723581	0.0498169493784791	0.261380798893283			PEX26	Acute lymphocytic leukaemia	-0.107849	0.115736526570183	0.404164573332922
TNFAIP8L2	Acute Lymphoblastic Leukemia	-0.00335453	0.121563918782784	0.979307167329054			HS3ST4	Acute lymphocytic leukaemia	0.249428563073502	0.58223610356128	0.710086782415023
TNFRSF1A	Acute Lymphoblastic Leukemia	-0.0159165	0.0914835960663375	0.865730413099516			MDGA2	Acute lymphocytic leukaemia	0.0479883227757402	0.0465117683585353	0.314507257063482
TNKS2	Acute Lymphoblastic Leukemia	0.0124705494840811	0.0796488588445614	0.8787002971004			MTCP1	Acute lymphocytic leukaemia	0.116885659833206	0.121260024453339	0.436787138118706
TOMM34	Acute Lymphoblastic Leukemia	-0.0109863	0.036941411241969	0.767324969913778			OLFM2	Acute lymphocytic leukaemia	-0.0795653	0.153711724527353	0.623241694366543
TOMM5	Acute Lymphoblastic Leukemia	-0.0521742	0.060704517401063	0.40455431367008			RAB3D	Acute lymphocytic leukaemia	0.191726855494178	0.343599931234533	0.675985835145605
TOMM7	Acute Lymphoblastic Leukemia	-0.0371102	0.0468952124719337	0.434569873653692			CINP	Acute lymphocytic leukaemia	-1.37746	0.918868427706212	0.374514479997841
TOMM70A	Acute Lymphoblastic Leukemia	0.00430031597693153	0.0725227004429478	0.953692276230548			CDH12	Acute lymphocytic leukaemia	0.126311327725777	0.560910884908102	0.858991935483202
TOP3B	Acute Lymphoblastic Leukemia	-0.0633616	0.0978286640252584	0.53177985049825			DDAH1	Acute lymphocytic leukaemia	0.0640731807687257	0.0752800192575235	0.41461260566134
TPD52	Acute Lymphoblastic Leukemia	0.0115796776130216	0.0603472525226753	0.849084398439929			VEGFA	Acute lymphocytic leukaemia	-0.0551705	0.056260640815803	0.349906954947732
TPD52L1	Acute Lymphoblastic Leukemia	-0.00146828	0.1866542206619	0.994100335845728			GMPR2	Acute lymphocytic leukaemia	0.108395832823737	0.0843220471659668	0.254936061775425
TPM1	Acute Lymphoblastic Leukemia	-0.0304227	0.045800252367466	0.5108841820492			UPP1	Acute lymphocytic leukaemia	0.0734114635122451	0.117621926785105	0.644782715620873
TPM3	Acute Lymphoblastic Leukemia	0.0242484100879507	0.0939587012559247	0.802863891907823			RBKS	Acute lymphocytic leukaemia	0.129130873016162	0.130908313033755	0.504351405088731
TPM4	Acute Lymphoblastic Leukemia	-0.0256682	0.101020351370603	0.815846623499052			HDHD3	Acute lymphocytic leukaemia	0.0604685464341532	0.12402238337431	0.674068041782207
TPR	Acute Lymphoblastic Leukemia	0.0590182322686382	0.0789635212258151	0.47049119123632			KDSR	Acute lymphocytic leukaemia	0.512919877213712	0.181925336733357	0.216987413962553
TPST1	Acute Lymphoblastic Leukemia	0.0240379562127878	0.0715048232949843	0.739161135844313			PDCD6	Acute lymphocytic leukaemia	0.0108365411324658	0.110456789785785	0.926567212844032
TRAF3	Acute Lymphoblastic Leukemia	-0.0629133	0.094329968146272	0.516467962087346			HSD17B8	Acute lymphocytic leukaemia	0.125904469965992	0.270947596389518	0.687839540913372
TRAF5	Acute Lymphoblastic Leukemia	0.0490230571565488	0.0740490049817835	0.517991107369498			KAAG1	Acute lymphocytic leukaemia	0.0148308329529009	0.0372902609808122	0.694508800991621
TRAM2	Acute Lymphoblastic Leukemia	0.086651068457589	0.0658290010274167	0.201039463605079			NPL	Acute lymphocytic leukaemia	0.122365056087554	0.145620823683206	0.448034375820406
TRANK1	Acute Lymphoblastic Leukemia	0.0821272887949756	0.112800448843359	0.480533592005829			DTYMK	Acute lymphocytic leukaemia	-0.0012677	0.125119523894354	0.992307883969259
TRAP1	Acute Lymphoblastic Leukemia	0.0314880084009418	0.0518989232033552	0.548926446547036			GLYAT	Acute lymphocytic leukaemia	-0.455414	1.06855694419866	0.71145274545729
TRAPPC11	Acute Lymphoblastic Leukemia	-0.686329	0.51072543125402	0.407271626269233			HK3	Acute lymphocytic leukaemia	0.161479163117734	0.270292057959235	0.610855297252945
TRAT1	Acute Lymphoblastic Leukemia	-0.0401213	0.0468870128012901	0.399693090831541			PARK7	Acute lymphocytic leukaemia	0.233343211711611	0.230757645603668	0.386395027442342
TRBV19	Acute Lymphoblastic Leukemia	-0.0217339	0.0828421080849871	0.797897489716995			STX1A	Acute lymphocytic leukaemia	-0.116487	0.15451226463145	0.505684714551139
TRBV25-1	Acute Lymphoblastic Leukemia	0.0695197282116075	0.169736785030826	0.703102657520949			CR1	Acute lymphocytic leukaemia	-0.0942798	0.0598319880778172	0.1324975989027
TRBV30	Acute Lymphoblastic Leukemia	0.0692703219465363	0.0553658252297483	0.219953987712767			KLB	Acute lymphocytic leukaemia	-0.0237411	0.0781541598416883	0.765768493901597
TRBV4-1	Acute Lymphoblastic Leukemia	0.0599316417640588	0.0596991054628578	0.323732615493522			LRP4	Acute lymphocytic leukaemia	-0.13494	0.0932857485473614	0.168604077654468
TRGC1	Acute Lymphoblastic Leukemia	-0.0949918	0.0890210419551064	0.301776509428427			PLXNA4	Acute lymphocytic leukaemia	0.120260708942163	0.16901464760734	0.550547493040322
TRGV2	Acute Lymphoblastic Leukemia	0.00566638952570635	0.062627681797772	0.928907077498198			PLXND1	Acute lymphocytic leukaemia	0.0279051335897432	0.0428204707579839	0.521359655861986
TRGV4	Acute Lymphoblastic Leukemia	0.00577516630522151	0.0378935626531568	0.87961510097517			SEZ6L	Acute lymphocytic leukaemia	0.0492790983478471	0.152414909944353	0.76767801790344
TRGV5	Acute Lymphoblastic Leukemia	0.0136456784599617	0.0398915288941227	0.734344129688784			EGFR	Acute lymphocytic leukaemia	0.199563315995441	0.129056606705163	0.172986060241241
TRGV5P	Acute Lymphoblastic Leukemia	-0.0152139	0.0417361206790779	0.717486832370106			IL15	Acute lymphocytic leukaemia	-0.0588355	0.0922706704479017	0.58896821972154
TRGV7	Acute Lymphoblastic Leukemia	-0.052116	0.0697837467272083	0.472365106568358			CEBPG	Acute lymphocytic leukaemia	-0.00882301	0.311961489722914	0.980005337624478
TRGV9	Acute Lymphoblastic Leukemia	0.00452350029070329	0.0844456799923661	0.958335193230142			DOK2	Acute lymphocytic leukaemia	0.3516833699486	0.21497397265657	0.243488392784663
TRIM38	Acute Lymphoblastic Leukemia	0.109782766190928	0.0410235402431875	0.0125048855978133			DEFA1	Acute lymphocytic leukaemia	0.389454377806525	0.220606079884134	0.175680705905202
TRIM4	Acute Lymphoblastic Leukemia	0.0360808949232334	0.0471270016648903	0.446637861411653			IGFBP5	Acute lymphocytic leukaemia	-0.204923	0.1892616340992	0.392091493146693
TRIM52	Acute Lymphoblastic Leukemia	-0.333634	0.392100501626188	0.55117654902486			KPNA1	Acute lymphocytic leukaemia	-0.0394693	0.0898059921320052	0.671932442190852
TRIM56	Acute Lymphoblastic Leukemia	0.070572722253849	0.162701488277793	0.693765037066639			SFTPD	Acute lymphocytic leukaemia	-0.0132511	0.042417025313879	0.757434058401312
TRIM60P18	Acute Lymphoblastic Leukemia	0.0777007913868164	0.0824762877327609	0.358615574305387			BRF1	Acute lymphocytic leukaemia	0.101501914026422	0.128214345029789	0.448920835456309
TRIM66	Acute Lymphoblastic Leukemia	-0.0171277	0.0381221037479127	0.654817342955985			ASB9	Acute lymphocytic leukaemia	0.101464778669439	0.199832060165032	0.638346163472125
TRIM7	Acute Lymphoblastic Leukemia	-0.155007	0.104018401862554	0.170362302044329			IHH	Acute lymphocytic leukaemia	0.358974516458796	0.293845475301028	0.309082867609733
TRIP11	Acute Lymphoblastic Leukemia	-0.166879	0.0805419133459311	0.0587215614123091			CD81	Acute lymphocytic leukaemia	0.328437268457632	0.232270338566581	0.292939069074851
TRIP6	Acute Lymphoblastic Leukemia	-0.0538814	0.0957170764849725	0.583851356642652			TCN1	Acute lymphocytic leukaemia	0.0342345222262981	0.0690101668406336	0.625841384750622
TRIT1	Acute Lymphoblastic Leukemia	-0.00567869	0.0432898072784293	0.896727549303029			NT5C3A	Acute lymphocytic leukaemia	0.510166190177538	0.324572412484352	0.256608145986073
TRMT112	Acute Lymphoblastic Leukemia	0.00831069424344194	0.046634665064882	0.860054928738906			EFHD1	Acute lymphocytic leukaemia	0.00455039447838824	0.211401898968111	0.983427694908713
TRMT12	Acute Lymphoblastic Leukemia	0.0141998848674753	0.0345190674799476	0.682271712342954			PTGR1	Acute lymphocytic leukaemia	0.0592312347706085	0.327334931517249	0.860416169463813
TRMT61A	Acute Lymphoblastic Leukemia	-0.12926	0.0994290844337895	0.213215798413367			DLG2	Acute lymphocytic leukaemia	-0.0129305	0.14670910064856	0.933188782964258
TRNT1	Acute Lymphoblastic Leukemia	0.0362081226402907	0.0495951318714951	0.471409383410066			INHBA	Acute lymphocytic leukaemia	0.176986117294765	0.199474425622827	0.400824374967121
TRPM6	Acute Lymphoblastic Leukemia	0.0747443690657448	0.0486026140923013	0.134921815534786			KNG1	Acute lymphocytic leukaemia	-0.0465196	0.0733575522301579	0.537885454068227
TRPV2	Acute Lymphoblastic Leukemia	-0.0591858	0.0864341232696496	0.506512296913853			FGL2	Acute lymphocytic leukaemia	0.0786596411426755	0.345468930261941	0.84104618525452
TRPV4	Acute Lymphoblastic Leukemia	0.00578659565582258	0.129781224570027	0.965883138129926			CRH	Acute lymphocytic leukaemia	0.0388614687342764	0.0879397859091853	0.674036520750726
TRPV5	Acute Lymphoblastic Leukemia	0.0499555637822813	0.0787518236590903	0.536086353739215			PDYN	Acute lymphocytic leukaemia	0.112677502063395	0.181794156336909	0.568946389145695
TSEN2	Acute Lymphoblastic Leukemia	-0.034007	0.0341034916603498	0.326163077733911			IAPP	Acute lymphocytic leukaemia	0.0657557810202014	0.0445175803053638	0.153828559356501
TSPAN32	Acute Lymphoblastic Leukemia	0.0190909730746201	0.070569143676606	0.789394627649547			F11	Acute lymphocytic leukaemia	0.00676199498893779	0.0711019431386991	0.926111900029394
TSPAN4	Acute Lymphoblastic Leukemia	0.0245011862665637	0.0564278202810714	0.668369003636802			COL18A1	Acute lymphocytic leukaemia	0.0717131842141961	0.117393676895674	0.567981087127048
TSPO	Acute Lymphoblastic Leukemia	0.013886131299711	0.0547766159417105	0.802232223871823			TIMP1	Acute lymphocytic leukaemia	0.038017333793072	0.264336603952409	0.89882456601543
TSPYL5	Acute Lymphoblastic Leukemia	-0.0432695	0.0575073745276651	0.460564848467379			PLAT	Acute lymphocytic leukaemia	-0.052869	0.0778682625265586	0.514245916405001
TTC17	Acute Lymphoblastic Leukemia	-0.0153126	0.139514952852126	0.917888806071027			PROK1	Acute lymphocytic leukaemia	0.241525664447082	0.301411146577703	0.569935938334321
TTC21A	Acute Lymphoblastic Leukemia	0.0614266367106982	0.0746148890180085	0.429561785478869			TIMP2	Acute lymphocytic leukaemia	-0.423221	0.230946315652031	0.126352282984358
TTC21B	Acute Lymphoblastic Leukemia	0.122971635036708	0.191440764361066	0.5864511148776			TGFB1	Acute lymphocytic leukaemia	-0.235742	0.29336656754472	0.505970648052425
TTC27	Acute Lymphoblastic Leukemia	0.0664276134360583	0.0737345114285674	0.381877295614383			C5	Acute lymphocytic leukaemia	-0.0121702	0.180865762099096	0.950585326693004
TTC3	Acute Lymphoblastic Leukemia	0.0770950222817753	0.0465191025489504	0.104743060721777			APOE	Acute lymphocytic leukaemia	0.0735195135582375	0.129526586536011	0.584184510703711
TTC32	Acute Lymphoblastic Leukemia	-0.0716213	0.0364254677895433	0.0570180119587588			BDNF	Acute lymphocytic leukaemia	-0.162463	0.249521007194372	0.550494606940289
TTC33	Acute Lymphoblastic Leukemia	0.0298904653823175	0.0984405319934103	0.767068438842412			CTSG	Acute lymphocytic leukaemia	0.150226007586049	0.196862301636811	0.585029737877419
TTC40	Acute Lymphoblastic Leukemia	-0.0508244	0.122710831411835	0.699988655375819			CXCL16	Acute lymphocytic leukaemia	-0.00963598	0.0534317641016003	0.859665252162599
TTC5	Acute Lymphoblastic Leukemia	-0.0347504	0.0782793536143292	0.66387880595041			FGF8	Acute lymphocytic leukaemia	0.0978652949715573	0.172609626466089	0.627879956660624
TTF2	Acute Lymphoblastic Leukemia	-0.033982	0.0418174423313706	0.423809867806809			PLA2G2E	Acute lymphocytic leukaemia	0.267107226810617	0.201472220469363	0.411403623801506
TTLL12	Acute Lymphoblastic Leukemia	0.0308138730999734	0.0397426413956653	0.442590723081043			APCS	Acute lymphocytic leukaemia	-0.00561876	0.0802184859593176	0.946118229522262
TTLL2	Acute Lymphoblastic Leukemia	-0.0200983	0.10568136259991	0.858431245590968			KIT	Acute lymphocytic leukaemia	0.124773469638235	0.0608796898420487	0.0544747847948808
TUBA1A	Acute Lymphoblastic Leukemia	-0.0696094	0.132186369584325	0.691429700133997			TIMP3	Acute lymphocytic leukaemia	-0.0817963	0.0614620923118891	0.212787811790576
TUBA1C	Acute Lymphoblastic Leukemia	-0.0453355	0.0629820509289754	0.480880785783249			GFRA3	Acute lymphocytic leukaemia	0.0277214015541226	0.187237496705316	0.90642519116932
TUBB4A	Acute Lymphoblastic Leukemia	-0.0999501	0.0733471317862305	0.215192249694366			GFRA2	Acute lymphocytic leukaemia	-0.0242465	0.0524786410698498	0.649921106898975
TULP4	Acute Lymphoblastic Leukemia	-0.00535027	0.0875309209754294	0.952464575724018			CCL21	Acute lymphocytic leukaemia	-0.0187397	0.0387216601948536	0.632990918809925
TXN2	Acute Lymphoblastic Leukemia	0.0885028689674563	0.189492357120283	0.721832871994862			POMC	Acute lymphocytic leukaemia	0.62019116241664	0.300581827534523	0.13108032675405
TYMP	Acute Lymphoblastic Leukemia	0.0473814423567501	0.0378153396596082	0.2157169850926			CFI	Acute lymphocytic leukaemia	0.00919041034020683	0.1174834536457	0.942572782024941
TYMS	Acute Lymphoblastic Leukemia	0.0715591756944872	0.116908104673811	0.562934639235284			IGFBP3	Acute lymphocytic leukaemia	0.0984343120582103	0.0610891694102214	0.127947134350216
TYW1B	Acute Lymphoblastic Leukemia	-0.0146646	0.0473850121152599	0.758793064977462			CCL2	Acute lymphocytic leukaemia	-0.0472227	0.155952593793594	0.790632257141631
U1	Acute Lymphoblastic Leukemia	0.0209354524247922	0.165857124834687	0.905643564826266			MMP9	Acute lymphocytic leukaemia	-0.0295213	0.0689433757150659	0.67459311370512
UBALD2	Acute Lymphoblastic Leukemia	0.137487486219059	0.116674282229099	0.277143459874242			MPO	Acute lymphocytic leukaemia	-0.0309014	0.0290754328014823	0.296643292629394
UBAP2L	Acute Lymphoblastic Leukemia	-0.0584024	0.0662663367299855	0.391187775645373			ROR1	Acute lymphocytic leukaemia	0.0634652764640692	0.0666549008590044	0.36889968354163
UBASH3A	Acute Lymphoblastic Leukemia	0.139993519275651	0.0517652963522078	0.0100017717205554			VEGFA	Acute lymphocytic leukaemia	-0.0998827	0.073694862862592	0.268320282603505
UBASH3B	Acute Lymphoblastic Leukemia	0.0713551515103724	0.113962329786302	0.558699502995703			ANGPT2	Acute lymphocytic leukaemia	-0.111698	0.107777749524929	0.327069617155652
UBE2J1	Acute Lymphoblastic Leukemia	0.024469983007545	0.0797043596099789	0.761484295459451			TNFRSF8	Acute lymphocytic leukaemia	0.0771799993036256	0.299794034353225	0.839589728048665
UBE2K	Acute Lymphoblastic Leukemia	0.0239279761538431	0.114251748021974	0.837624321017571			CST3	Acute lymphocytic leukaemia	0.117770153377323	0.0840374431051523	0.233713223601001
UBE3B	Acute Lymphoblastic Leukemia	0.113570364380081	0.0382832595384711	0.00691099928067351			TYRO3	Acute lymphocytic leukaemia	-0.0776333	0.202203363737367	0.716810050893922
UBFD1	Acute Lymphoblastic Leukemia	-0.359453	0.310058757595261	0.330223036640606			EIF5	Acute lymphocytic leukaemia	0.632756793600001	0.500503129205942	0.426039771642922
UBTD2	Acute Lymphoblastic Leukemia	0.128592044079184	0.33374533857737	0.765870347753197			EFNA5	Acute lymphocytic leukaemia	-0.153159	0.632461989622268	0.820562690877043
UCKL1	Acute Lymphoblastic Leukemia	-0.00905347	0.0423225499657233	0.831819628492559			ERBB3	Acute lymphocytic leukaemia	-0.572134	0.991621089647641	0.622250086661225
UCP2	Acute Lymphoblastic Leukemia	0.0641709905650963	0.0403177771899625	0.119149665375166			ERBB4	Acute lymphocytic leukaemia	0.0721427378684456	0.373685374797758	0.864742268472243
UGCG	Acute Lymphoblastic Leukemia	-0.00879166	0.0881661062837536	0.923022574874617			IL6ST	Acute lymphocytic leukaemia	-0.0438254	0.0544120057679513	0.430533356840788
UGDH	Acute Lymphoblastic Leukemia	0.0255235357777765	0.0400523761625784	0.52589998724369			IL10RB	Acute lymphocytic leukaemia	-0.0552617	0.186878693435483	0.7953285245791
UGGT1	Acute Lymphoblastic Leukemia	-0.182044	0.255093615298322	0.549492542541512			IL12RB1	Acute lymphocytic leukaemia	0.0767634171986071	0.452574716474983	0.893037785107018
UGT2B17	Acute Lymphoblastic Leukemia	0.0355386862135024	0.073134462908849	0.634034504116995			LAYN	Acute lymphocytic leukaemia	0.143149099291212	0.091352748815078	0.177898606311778
ULK1	Acute Lymphoblastic Leukemia	0.192212267959672	0.171582979584182	0.379077823349543			LTBR	Acute lymphocytic leukaemia	-0.0596634	0.124739742640568	0.647011849640657
UPF3A	Acute Lymphoblastic Leukemia	-0.000433034	0.0611411496418635	0.994410084151786			MRC1	Acute lymphocytic leukaemia	0.0424955348201044	0.0528348059145031	0.433007173486504
UPK3A	Acute Lymphoblastic Leukemia	-0.00230431	0.0520819187197118	0.965109023139733			MST1R	Acute lymphocytic leukaemia	0.068735613872059	0.180807131488912	0.723151145656602
UROS	Acute Lymphoblastic Leukemia	-0.0176222	0.0478834163301258	0.714749954828461			CDH3	Acute lymphocytic leukaemia	-0.0123739	0.0624123366174267	0.846813630371438
USP1	Acute Lymphoblastic Leukemia	-0.00389024	0.289646617716858	0.990127207456225			PRKCA	Acute lymphocytic leukaemia	0.00748513127988594	0.252365814431298	0.97903193244663
USP12	Acute Lymphoblastic Leukemia	-0.0244904	0.113651949857963	0.843207142476402			ICAM3	Acute lymphocytic leukaemia	-0.0262945	0.153478806530478	0.874873462760197
USP15	Acute Lymphoblastic Leukemia	0.054938447742881	0.0666890345658714	0.417270876265076			PLAUR	Acute lymphocytic leukaemia	0.107172057057377	0.0598440598419003	0.0911389224507372
USP33	Acute Lymphoblastic Leukemia	0.107213162710086	0.218741523728541	0.709876095356105			TNFRSF1A	Acute lymphocytic leukaemia	0.0690976428686457	0.0789374785093827	0.410413106913571
USP42	Acute Lymphoblastic Leukemia	-0.281	0.248407525750972	0.460856410089454			NTRK3	Acute lymphocytic leukaemia	0.0784188341932904	0.0954470686944745	0.442722412473599
USP6	Acute Lymphoblastic Leukemia	-0.0841483	0.0881724592052137	0.358731530968181			TNFRSF17	Acute lymphocytic leukaemia	-0.0240006	0.0782019923883238	0.763134515721553
UTF1	Acute Lymphoblastic Leukemia	0.00892033193421194	0.0925125538829187	0.926930238919335			EGFR	Acute lymphocytic leukaemia	0.0135825440255253	0.201138195154511	0.948355109388162
UTP15	Acute Lymphoblastic Leukemia	-0.138116	0.0944817094366122	0.239949126167643			HGF	Acute lymphocytic leukaemia	0.0414890718835806	0.152285238123681	0.810831878229078
VAMP1	Acute Lymphoblastic Leukemia	-0.0257425	0.0429588603018972	0.552311898362168			MIA	Acute lymphocytic leukaemia	0.0631166972135373	0.0744242574094438	0.416238412559718
VAMP5	Acute Lymphoblastic Leukemia	0.0212446013851497	0.048455189780857	0.663763158051132			PLA2G2A	Acute lymphocytic leukaemia	-0.098963	0.0943930831424347	0.321785203076547
VCAM1	Acute Lymphoblastic Leukemia	-0.105466	0.0970955014204402	0.309029839028927			OSM	Acute lymphocytic leukaemia	0.0825865712283999	0.136437764069938	0.567149956390813
VCP	Acute Lymphoblastic Leukemia	0.103151337865679	0.0606046790093765	0.103507997907569			PECAM1	Acute lymphocytic leukaemia	-0.0555796	0.140286279375181	0.718463949946775
VDR	Acute Lymphoblastic Leukemia	0.118730312213485	0.0786675106029231	0.147681019030316			PF4	Acute lymphocytic leukaemia	-0.000339417	0.170408659844194	0.998506162233346
VENTX	Acute Lymphoblastic Leukemia	0.0477113308262867	0.0601900865281222	0.435139554420134			PROS1	Acute lymphocytic leukaemia	-0.077425	0.170365223360309	0.680362234654114
VEZT	Acute Lymphoblastic Leukemia	0.0265647885538143	0.0938230388598714	0.79548533821084			TNFRSF13B	Acute lymphocytic leukaemia	0.0703219845055676	0.255856413180609	0.809221676927951
VIPAS39	Acute Lymphoblastic Leukemia	-0.00906408	0.211579449590021	0.968520877684099			CCL25	Acute lymphocytic leukaemia	0.035620569581462	0.0616754924832707	0.571140095397311
VIPR2	Acute Lymphoblastic Leukemia	-0.0478286	0.0861653550270833	0.592366918469183			SERPINA7	Acute lymphocytic leukaemia	-0.288054	0.155648213041619	0.123441977680733
VIT	Acute Lymphoblastic Leukemia	0.0801031071437729	0.0744398571069579	0.297851257125418			TNFSF18	Acute lymphocytic leukaemia	0.169940157531963	0.324660485434493	0.652885783794209
VLDLR	Acute Lymphoblastic Leukemia	0.0437643879241418	0.038689959952492	0.264258792088816			AIMP1	Acute lymphocytic leukaemia	-0.172697	0.227626467171689	0.490288191748214
VPS26A	Acute Lymphoblastic Leukemia	-0.0280555	0.0615290225414513	0.655933457699159			CSF3R	Acute lymphocytic leukaemia	0.165820963687665	0.225497437877135	0.596342902866488
VPS33B	Acute Lymphoblastic Leukemia	0.022448172588453	0.0495492677397351	0.654134414604325			IL37	Acute lymphocytic leukaemia	0.0115741304881697	0.142006642187261	0.938956339001683
VPS53	Acute Lymphoblastic Leukemia	0.00238652759933703	0.0411651015958848	0.954072707754467			MICA	Acute lymphocytic leukaemia	-0.153063	0.0782033357488671	0.0669456991269461
VWF	Acute Lymphoblastic Leukemia	0.123257634436049	0.0477940052052547	0.0145569625054836			POR	Acute lymphocytic leukaemia	-0.016559	0.0866020825996548	0.857675818242962
WAC	Acute Lymphoblastic Leukemia	-0.177245	0.0924790516915975	0.0745420182893073			NANOG	Acute lymphocytic leukaemia	0.451963507166628	0.521747178208787	0.477668531425476
WARS2	Acute Lymphoblastic Leukemia	-0.02202	0.0375024067374761	0.559372793317505			NCR2	Acute lymphocytic leukaemia	0.284130597327237	0.195019528274874	0.382940517736564
WASL	Acute Lymphoblastic Leukemia	-0.00250838	0.0780600649790864	0.975066564144148			SIGLEC6	Acute lymphocytic leukaemia	0.0556066761073617	0.102538499154819	0.597538555272634
WDFY1	Acute Lymphoblastic Leukemia	0.160347696184882	0.0570448487196864	0.010470332396823			SIGLEC7	Acute lymphocytic leukaemia	-0.105195	0.0603395742031313	0.119428311140036
WDFY2	Acute Lymphoblastic Leukemia	-0.0308969	0.0457146350844449	0.50448157770159			SHH	Acute lymphocytic leukaemia	0.237344025492511	0.251823373483477	0.445424898573452
WDFY4	Acute Lymphoblastic Leukemia	-0.0561101	0.0476690157175473	0.249828520316402			APOA1	Acute lymphocytic leukaemia	-0.102932	0.0742598034003087	0.193168407521536
WDR19	Acute Lymphoblastic Leukemia	-0.151209	0.0569145703491896	0.0119281451716969			GDF5	Acute lymphocytic leukaemia	0.206217598654062	0.125578282248922	0.199100800978167
WDR27	Acute Lymphoblastic Leukemia	-0.0755163	0.154546635899579	0.658593763766835			C3	Acute lymphocytic leukaemia	0.246596607117027	0.140147975467323	0.220554624160749
WDR5B	Acute Lymphoblastic Leukemia	0.0679188235644511	0.0569040384570196	0.241701515413836			FAM107A	Acute lymphocytic leukaemia	0.0720229272218568	0.220914500915218	0.775359817027148
WDR83OS	Acute Lymphoblastic Leukemia	0.132852028898257	0.0524108563835959	0.0228757576140961			FGF20	Acute lymphocytic leukaemia	-0.239981	0.684814697186842	0.785420788818586
WDR86-AS1	Acute Lymphoblastic Leukemia	-0.0309529	0.0698171740937209	0.666111456511732			CCL1	Acute lymphocytic leukaemia	0.00762264999405111	0.0891104039635313	0.9337035424394
WDR86	Acute Lymphoblastic Leukemia	0.0108519864870082	0.0537678468577265	0.841154909408446			IL16	Acute lymphocytic leukaemia	0.0784927936239023	0.126593982735571	0.550608372970841
WEE1	Acute Lymphoblastic Leukemia	-0.0233985	0.077860620203781	0.769385873454344			LTF	Acute lymphocytic leukaemia	0.0682703724041618	0.0565068217542944	0.254773410222024
WRAP73	Acute Lymphoblastic Leukemia	0.0584067518751291	0.0739051505158081	0.439109585725347			CCL3L1	Acute lymphocytic leukaemia	0.00951969641886586	0.0946516278192819	0.923163505864109
WRB	Acute Lymphoblastic Leukemia	0.045491001381356	0.0347054071251668	0.194768187117571			MMP3	Acute lymphocytic leukaemia	0.0159383872514796	0.146614732442003	0.917660952865343
WTAP	Acute Lymphoblastic Leukemia	0.037971656936676	0.057691547041189	0.528901508498071			MMP7	Acute lymphocytic leukaemia	0.00588568159283665	0.0676719599393054	0.933522376462947
WWC1	Acute Lymphoblastic Leukemia	-0.0561497	0.0724726553119854	0.447111617436817			PPBP	Acute lymphocytic leukaemia	0.227874592036276	0.187817608446898	0.29176892749985
XKR3	Acute Lymphoblastic Leukemia	-0.018294	0.0471508944655295	0.699983676395493			APOB	Acute lymphocytic leukaemia	-0.0566926	0.0769385174020326	0.472578498142835
XPO4	Acute Lymphoblastic Leukemia	-0.0800146	0.285126513662504	0.790236569716136			ACVR1B	Acute lymphocytic leukaemia	0.289723133391694	0.222329238393061	0.416689982580116
XRCC3	Acute Lymphoblastic Leukemia	-0.153798	0.0618467382471781	0.0213803997745576			ANGPT1	Acute lymphocytic leukaemia	0.0274999507584651	0.137918000552119	0.849810143925289
XRRA1	Acute Lymphoblastic Leukemia	0.00803871708416688	0.0349033201788532	0.818519674177104			AGRP	Acute lymphocytic leukaemia	0.0555697778974816	0.0541162683329604	0.328684435904948
XXyac-YRM2039.2	Acute Lymphoblastic Leukemia	-0.0225827	0.0658995149585883	0.736590828686611			BCAM	Acute lymphocytic leukaemia	0.0545856655577804	0.0391073833827763	0.179758266654834
XYLT1	Acute Lymphoblastic Leukemia	-0.00863145	0.030710426375033	0.779506114177079			CDH5	Acute lymphocytic leukaemia	0.0276144664113809	0.0568587029307658	0.634220114970446
Y_RNA	Acute Lymphoblastic Leukemia	0.0548901202673578	0.0400357427077756	0.176877774865581			COMMD7	Acute lymphocytic leukaemia	0.148491599959465	0.203661035648789	0.518699339482944
YBEY	Acute Lymphoblastic Leukemia	-0.0665749	0.0417974012108656	0.118206139480883			EDA	Acute lymphocytic leukaemia	0.252089717054345	0.24600178620817	0.413241620333638
YBX2	Acute Lymphoblastic Leukemia	0.250008413778268	0.148813728411386	0.191547335949766			CX3CL1	Acute lymphocytic leukaemia	0.0231741233073347	0.0981012538497469	0.820020056632752
YIPF3	Acute Lymphoblastic Leukemia	-0.0453264	0.12327268609165	0.737512469750076			SPINT1	Acute lymphocytic leukaemia	0.0268972155969926	0.0528647047186768	0.617840954138581
YIPF5	Acute Lymphoblastic Leukemia	0.0524860837709129	0.0450477232717989	0.250392617791651			KLK11	Acute lymphocytic leukaemia	0.0214183514863344	0.0704118146742281	0.767901227125388
YRDC	Acute Lymphoblastic Leukemia	-0.141788	0.171129448110902	0.453939234454363			KLK8	Acute lymphocytic leukaemia	0.0051125733363608	0.110855779993323	0.964345765359028
YTHDC2	Acute Lymphoblastic Leukemia	-0.0938205	0.0527337810303853	0.0869126743981388			LCN2	Acute lymphocytic leukaemia	0.0504430776347578	0.0777301374046813	0.524564149771213
ZBTB22	Acute Lymphoblastic Leukemia	0.119124338920142	0.138469833407812	0.422667182316434			MET	Acute lymphocytic leukaemia	-0.0208753	0.0525746557895428	0.696569242528616
ZBTB38	Acute Lymphoblastic Leukemia	-0.0881392	0.0849458584004746	0.32389807467891			MMP17	Acute lymphocytic leukaemia	0.111872046571953	0.101461816273284	0.332076945989091
ZBTB47	Acute Lymphoblastic Leukemia	-0.0238979	0.0663655319648892	0.725033688089414			SPINT2	Acute lymphocytic leukaemia	-0.050229	0.0926013683096693	0.607071364263916
ZBTB5	Acute Lymphoblastic Leukemia	0.0479631456339514	0.158021599409824	0.790155649026043			TIE1	Acute lymphocytic leukaemia	0.0311956303122227	0.0375885533618006	0.413860016400489
ZC2HC1A	Acute Lymphoblastic Leukemia	0.0210700448807898	0.0410716315856149	0.609769369644794			AIF1	Acute lymphocytic leukaemia	-0.137249	0.158286249319106	0.449682580876337
ZCCHC14	Acute Lymphoblastic Leukemia	0.0389479107875291	0.0879633272341266	0.665804887538057			C5	Acute lymphocytic leukaemia	-0.0336769	0.0871314501613649	0.71502264769512
ZCCHC24	Acute Lymphoblastic Leukemia	-0.011517	0.127434151606583	0.929479588793758			CHEK1	Acute lymphocytic leukaemia	0.206277657895802	0.287624542910874	0.547713085527007
ZDHHC13	Acute Lymphoblastic Leukemia	0.0163713536649892	0.0757235830481847	0.831263924191092			MAPK3	Acute lymphocytic leukaemia	-0.0203591	0.264424702518336	0.951080565553123
ZDHHC18	Acute Lymphoblastic Leukemia	-0.00675563	0.0681822873633314	0.922232189803843			HDAC8	Acute lymphocytic leukaemia	0.00851051303002593	0.129175062683404	0.951615308159712
ZDHHC19	Acute Lymphoblastic Leukemia	-0.00994877	0.0542910209973462	0.855877890217146			KPNA2	Acute lymphocytic leukaemia	0.00128723505945716	0.0297669993472161	0.965767878191007
ZDHHC7	Acute Lymphoblastic Leukemia	0.0159937412476116	0.0430061329491414	0.712279296097425			MAP2K1	Acute lymphocytic leukaemia	0.000753804074443372	0.264773610620969	0.9981875637809
ZFHX3	Acute Lymphoblastic Leukemia	0.0389452427793026	0.0981535388264913	0.69986623426215			RAD51	Acute lymphocytic leukaemia	-0.0570191	0.0798955023123818	0.489079472602646
ZFP14	Acute Lymphoblastic Leukemia	-0.0583835	0.0565940122504099	0.314565055706111			SERPINA3	Acute lymphocytic leukaemia	0.317218961322454	0.40561676685737	0.577469518313985
ZFP30	Acute Lymphoblastic Leukemia	-0.0419648	0.0604125714010571	0.493953556470262			C7	Acute lymphocytic leukaemia	0.103083602259624	0.0765569825899322	0.205232051858832
ZFP62	Acute Lymphoblastic Leukemia	-0.00750279	0.0997334864063412	0.942950187026025			CTF1	Acute lymphocytic leukaemia	0.315137309117041	0.239151803702038	0.318291218691668
ZFP91	Acute Lymphoblastic Leukemia	0.0443517821340322	0.0795465242526607	0.589408543887091			CCL28	Acute lymphocytic leukaemia	0.0333254012330446	0.0590922246426854	0.580148792280536
ZFR2	Acute Lymphoblastic Leukemia	0.0720003643859118	0.290651949596596	0.827462312589337			CCL14	Acute lymphocytic leukaemia	0.0415149554847446	0.0814072761780576	0.62575673274772
ZFYVE26	Acute Lymphoblastic Leukemia	-0.050852	0.148680747189816	0.749549116613237			IL4	Acute lymphocytic leukaemia	0.695886119996356	0.628763225717147	0.383699329900504
ZFYVE27	Acute Lymphoblastic Leukemia	0.0954601500926088	0.164095916775015	0.664577631898856			MDK	Acute lymphocytic leukaemia	-0.0228062	0.112331054095273	0.845823913437154
ZMIZ2	Acute Lymphoblastic Leukemia	-0.0981084	0.0598775288142832	0.108618242653343			CCL23	Acute lymphocytic leukaemia	-0.0696952	0.230625291772037	0.782238970363522
ZMPSTE24	Acute Lymphoblastic Leukemia	-0.0676435	0.13133221802515	0.622374167959885			SERPINE1	Acute lymphocytic leukaemia	0.279541016914924	0.164375647855594	0.164234984503008
ZNF121	Acute Lymphoblastic Leukemia	0.0652773657992074	0.0739223065115966	0.406509929037939			ARTN	Acute lymphocytic leukaemia	-0.199898	0.178526412786072	0.379254221810334
ZNF124	Acute Lymphoblastic Leukemia	-0.0718532	0.0524770018798854	0.183604888002507			CYCS	Acute lymphocytic leukaemia	-0.00885781	0.151773358076638	0.957130156787303
ZNF137P	Acute Lymphoblastic Leukemia	-0.175684	0.176897135617085	0.393847515789072			CYP3A4	Acute lymphocytic leukaemia	0.106620868394045	0.0881120585005949	0.254082422971152
ZNF175	Acute Lymphoblastic Leukemia	-0.0750916	0.0436439426498246	0.093686981078454			NBL1	Acute lymphocytic leukaemia	-0.0799034	0.232839263828781	0.74542867690669
ZNF204P	Acute Lymphoblastic Leukemia	0.00977597068580289	0.0691827983313109	0.89018253384318			CFD	Acute lymphocytic leukaemia	0.133261558877485	0.09434729719218	0.183221144446278
ZNF205	Acute Lymphoblastic Leukemia	0.01093683626434	0.0646324471634445	0.86698859178596			GHR	Acute lymphocytic leukaemia	-0.0173196	0.0875634564402024	0.849736411485011
ZNF213	Acute Lymphoblastic Leukemia	-0.0185191	0.0637451764451761	0.774141571736565			PLA2G10	Acute lymphocytic leukaemia	0.164987738040912	0.327748000201585	0.664655229470377
ZNF281	Acute Lymphoblastic Leukemia	0.0557050471456907	0.121605741504994	0.657754921587118			IGFBP4	Acute lymphocytic leukaemia	3.44107021040346	2.00532462299467	0.228304745246264
ZNF282	Acute Lymphoblastic Leukemia	-0.0438415	0.0658395066046316	0.51210917091732			IGF1	Acute lymphocytic leukaemia	0.0715452810033768	0.0757196486155966	0.366994614124316
ZNF317	Acute Lymphoblastic Leukemia	-0.0690915	0.0538809790122621	0.216948416655511			CFP	Acute lymphocytic leukaemia	-0.176655	0.0951958902688602	0.160513049011372
ZNF318	Acute Lymphoblastic Leukemia	-0.0336411	0.0466766053956916	0.477507867954369			PROC	Acute lymphocytic leukaemia	0.0316050221641915	0.0768644415747388	0.693238004743169
ZNF319	Acute Lymphoblastic Leukemia	-0.0618031	0.0635604765532377	0.343762560122818			PTHLH	Acute lymphocytic leukaemia	0.168165611192188	0.129843796744068	0.264966790046151
ZNF365	Acute Lymphoblastic Leukemia	0.0497119128704976	0.0492952150895913	0.322898517914438			CLEC11A	Acute lymphocytic leukaemia	0.0126972270894616	0.0412363210610132	0.761181276134986
ZNF420	Acute Lymphoblastic Leukemia	-0.101258	0.117508849872111	0.409035601521495			VCAM1	Acute lymphocytic leukaemia	0.0499802027541777	0.0916168219656527	0.602327524049519
ZNF425	Acute Lymphoblastic Leukemia	-0.00519761	0.0525576266750334	0.922379537163889			AREG	Acute lymphocytic leukaemia	-0.15297	0.679552751901013	0.859043515395001
ZNF429	Acute Lymphoblastic Leukemia	-0.0630048	0.030748859077006	0.0446991473810243			BMP7	Acute lymphocytic leukaemia	0.0860834278902618	0.151830077294807	0.588443998333654
ZNF470	Acute Lymphoblastic Leukemia	-0.0824093	0.0520787843681761	0.126129185632231			CD36	Acute lymphocytic leukaemia	0.0534411257831567	0.0519665287740994	0.322527909723906
ZNF471	Acute Lymphoblastic Leukemia	-0.0686192	0.112841379103298	0.559982688884425			CNTN1	Acute lymphocytic leukaemia	-0.0510003	0.0742688619638392	0.509576939617919
ZNF496	Acute Lymphoblastic Leukemia	0.0444003978640892	0.112836477633698	0.700857000510249			DSG1	Acute lymphocytic leukaemia	-0.107444	0.154727551015323	0.518364552429523
ZNF500	Acute Lymphoblastic Leukemia	-0.0135865	0.0610906103906363	0.82546213856878			EDAR	Acute lymphocytic leukaemia	-0.0016272	0.0431454696574405	0.970308975501512
ZNF561	Acute Lymphoblastic Leukemia	-0.0220084	0.044773398081618	0.628667650019715			CXCL5	Acute lymphocytic leukaemia	0.136362469002128	0.15329584424654	0.423978164991953
ZNF577	Acute Lymphoblastic Leukemia	-0.0249295	0.172038077537623	0.89397195802328			LGALS4	Acute lymphocytic leukaemia	-0.487834	0.782177066695555	0.644985855326474
ZNF586	Acute Lymphoblastic Leukemia	0.0621597254945066	0.045066684432428	0.176557669200412			CXCL1	Acute lymphocytic leukaemia	0.0267714469798685	0.0720311122761024	0.716621875367376
ZNF587B	Acute Lymphoblastic Leukemia	-0.16782	0.0778457233385163	0.045719719685428			IL1R1	Acute lymphocytic leukaemia	0.0625236875845336	0.0579349272586636	0.297544694520141
ZNF595	Acute Lymphoblastic Leukemia	-0.00799559	0.114724572661655	0.947782455436535			IL17RA	Acute lymphocytic leukaemia	-0.0471461	0.0825572177945437	0.583632925166248
ZNF605	Acute Lymphoblastic Leukemia	0.00510132329116875	0.0689773938290296	0.941535968969612			IL18RAP	Acute lymphocytic leukaemia	0.239546985480948	0.208681597857963	0.369785078234158
ZNF606	Acute Lymphoblastic Leukemia	0.0478244976596796	0.248359180467597	0.859600376516898			IL1RL2	Acute lymphocytic leukaemia	0.0480216052879086	0.12535460540643	0.727188954598653
ZNF613	Acute Lymphoblastic Leukemia	-0.00618115	0.0506453564396089	0.903559241607851			JAM2	Acute lymphocytic leukaemia	0.380088741692844	0.221229241937587	0.335570958760283
ZNF627	Acute Lymphoblastic Leukemia	0.201350234390189	0.12098445514064	0.156942944462618			JAM3	Acute lymphocytic leukaemia	0.644177103732922	0.978040162318129	0.629216349057654
ZNF638	Acute Lymphoblastic Leukemia	-0.0129893	0.0918610247118544	0.890108900491945			LSAMP	Acute lymphocytic leukaemia	-0.0381374	0.102595688534743	0.717852827822804
ZNF649	Acute Lymphoblastic Leukemia	0.527044822502578	1.1565175603521	0.727782606867589			MBL2	Acute lymphocytic leukaemia	-0.00297121	0.0729879587774362	0.967932167658722
ZNF667	Acute Lymphoblastic Leukemia	-0.0682896	0.140931180003275	0.661164514816915			NCR3	Acute lymphocytic leukaemia	-0.0605832	0.107488709606172	0.629776803745907
ZNF668	Acute Lymphoblastic Leukemia	-0.100535	0.0765384534376409	0.200934016118051			PDCD1LG2	Acute lymphocytic leukaemia	0.0477567584123097	0.119512058050228	0.705950945929594
ZNF670	Acute Lymphoblastic Leukemia	0.399495947268768	0.263021304125292	0.226102240556508			SIGLEC9	Acute lymphocytic leukaemia	-0.0248658	0.0726711090413886	0.741039424960015
ZNF677	Acute Lymphoblastic Leukemia	-0.0533668	0.107256258714879	0.636497856827862			TGFBR3	Acute lymphocytic leukaemia	-0.0239974	0.0962332103241917	0.808124507607372
ZNF701	Acute Lymphoblastic Leukemia	-0.0481622	0.0695178645245211	0.498366026803102			SERPINF2	Acute lymphocytic leukaemia	-0.00061272	0.181673437229557	0.99752075822687
ZNF718	Acute Lymphoblastic Leukemia	0.0455401291094814	0.0849397095550698	0.604853243377806			FGF2	Acute lymphocytic leukaemia	0.0192863799469541	0.0578996057117322	0.747620323238729
ZNF767	Acute Lymphoblastic Leukemia	-0.136166	0.114918250680132	0.257268587929283			CAST	Acute lymphocytic leukaemia	-0.0673465	0.0708543211371805	0.356000216067054
ZNF772	Acute Lymphoblastic Leukemia	-0.125992	0.0439045857026013	0.00733681804538254			CCL23	Acute lymphocytic leukaemia	0.197921586607908	0.130970607314829	0.205268127671112
ZNF775	Acute Lymphoblastic Leukemia	-0.0331449	0.0914286464206813	0.723831148101028			CD209	Acute lymphocytic leukaemia	0.0620239621434375	0.0523596768493096	0.252482972763826
ZNF79	Acute Lymphoblastic Leukemia	-0.0308184	0.0594410312868507	0.609082144192005			CLEC4M	Acute lymphocytic leukaemia	-0.132505	0.191495905747943	0.527039206508517
ZNF823	Acute Lymphoblastic Leukemia	0.0339376447701489	0.0798235756059599	0.680706070004128			LGALS2	Acute lymphocytic leukaemia	0.0397614504811866	0.114257254979714	0.750827500113958
ZNF84	Acute Lymphoblastic Leukemia	-0.0359113	0.0559552489511732	0.527643006461353			IL19	Acute lymphocytic leukaemia	-0.126763	0.0807835623033806	0.155248707479306
ZNF841	Acute Lymphoblastic Leukemia	-0.0618538	0.193021660019813	0.759493500684275			IL1B	Acute lymphocytic leukaemia	-0.354022	0.1232398087371	0.0453484179903649
ZNHIT3	Acute Lymphoblastic Leukemia	0.0217684558885462	0.0877086572442038	0.808183318527202			CXCL11	Acute lymphocytic leukaemia	-0.0122606	0.0876565244630683	0.890754689997428
ZSWIM7	Acute Lymphoblastic Leukemia	0.0532389661497555	0.0295928711102707	0.0766535369766362			CCL3	Acute lymphocytic leukaemia	-0.054944	0.0968812002048747	0.61028963791874
ZYX	Acute Lymphoblastic Leukemia	0.0383738894586211	0.042338528408913	0.370611014846242			MRC2	Acute lymphocytic leukaemia	0.0274733762028529	0.106602004388376	0.802419744768973
ZZEF1	Acute Lymphoblastic Leukemia	-0.0944064	0.482609436910581	0.857410246361636			MB	Acute lymphocytic leukaemia	-0.183374	0.332821445654603	0.636983234508915
A2M-AS1	Acute Myeloid Leukemia	0.0726257450039711	0.0606425992872117	0.250955605274352			SPARC	Acute lymphocytic leukaemia	-0.0668415	0.248119700399597	0.805094005466738
A4GALT	Acute Myeloid Leukemia	0.00762899488423264	0.0498632881474733	0.87973403280566			CCL18	Acute lymphocytic leukaemia	0.0417887421825833	0.0513968540008604	0.432019613242518
AATK	Acute Myeloid Leukemia	0.035613862497077	0.0391676605000828	0.369609998340125			PTN	Acute lymphocytic leukaemia	0.0719643375735809	0.24255210761803	0.786053842802545
ABAT	Acute Myeloid Leukemia	0.00332589214655061	0.0346866083243302	0.924058149573498			RETN	Acute lymphocytic leukaemia	0.0137296720742749	0.047136233571804	0.773697529824783
ABCA1	Acute Myeloid Leukemia	-0.0316002	0.0790956681168489	0.69421169801483			PRSS1	Acute lymphocytic leukaemia	0.0479872098186441	0.10222928507232	0.645528926529967
ABCA10	Acute Myeloid Leukemia	-0.0341192	0.133330355835768	0.82194320901942			VWF	Acute lymphocytic leukaemia	0.0274692471740262	0.087390134871705	0.768983279972346
ABCA2	Acute Myeloid Leukemia	0.0228683006974272	0.0593964135408877	0.70450496250131			FASLG	Acute lymphocytic leukaemia	-0.0432107	0.0713652299828967	0.556134172328576
ABCA5	Acute Myeloid Leukemia	-0.0490518	0.0751503265742184	0.542754710545947			HP	Acute lymphocytic leukaemia	-0.00437159	0.0548107175749371	0.937361170951245
ABCC4	Acute Myeloid Leukemia	-0.0030361	0.0434128240508353	0.944611789864137			TNFSF13B	Acute lymphocytic leukaemia	-0.011305	0.128621211078145	0.932821082433332
ABCC5	Acute Myeloid Leukemia	0.0851606966639958	0.0309843070949386	0.00756182121131601			C9	Acute lymphocytic leukaemia	-0.00994005	0.0693223876098899	0.888831422513284
ABCD2	Acute Myeloid Leukemia	-0.0370512	0.0647772565422635	0.58522753896207			LGALS3	Acute lymphocytic leukaemia	0.0461628949436357	0.0642466548011606	0.490664913076365
ABHD3	Acute Myeloid Leukemia	-0.262095	0.118971948236772	0.0923437774663525			IL2	Acute lymphocytic leukaemia	0.5637293787763	0.371224254740645	0.370727817224164
ABHD5	Acute Myeloid Leukemia	0.0491025041895932	0.0806304051988824	0.559427929614692			IL13	Acute lymphocytic leukaemia	0.60935828738882	0.362574317938927	0.341700796797781
ABHD6	Acute Myeloid Leukemia	0.0711721077468756	0.136440708878273	0.629475821014889			IL18BP	Acute lymphocytic leukaemia	-0.149504	0.143481287119835	0.374008380572045
ABO	Acute Myeloid Leukemia	-0.0223558	0.0307006169491065	0.471484796858035			LBP	Acute lymphocytic leukaemia	0.141363430159273	0.0741912277785483	0.0831874378457285
ABP1	Acute Myeloid Leukemia	0.0105874468506444	0.0300671744805914	0.726019700674899			F10	Acute lymphocytic leukaemia	0.0154400088745644	0.0849755873353691	0.860338084006598
ABR	Acute Myeloid Leukemia	0.159471153713148	0.0611947744544908	0.0191080148769929			PGF	Acute lymphocytic leukaemia	-0.0885739	0.478403871675202	0.883453027624322
AC002310.12	Acute Myeloid Leukemia	-0.0467478	0.0661630743298117	0.502676980979867			RARRES2	Acute lymphocytic leukaemia	0.111805525102721	0.0892513536921867	0.256924506996594
AC002456.2	Acute Myeloid Leukemia	0.0984141941733342	0.0915333431703617	0.342827230247176			AURKA	Acute lymphocytic leukaemia	-0.00834776	0.26866135669138	0.978034298962873
AC004967.8	Acute Myeloid Leukemia	-0.0238864	0.129874115537983	0.860134994460905			DIABLO	Acute lymphocytic leukaemia	-0.429924	0.215095875134847	0.295325812267526
AC005224.2	Acute Myeloid Leukemia	0.0487587965184122	0.0926293915400263	0.621125933796539			CD4	Acute lymphocytic leukaemia	-0.0862416	0.230389899065814	0.744121357554403
AC006547.14	Acute Myeloid Leukemia	-0.0871242	0.152659244673152	0.608143915125907			TNFRSF1B	Acute lymphocytic leukaemia	-0.0105738	0.100640559286495	0.920408527449567
AC007950.1	Acute Myeloid Leukemia	0.103369649438002	0.121607709496203	0.457767999699087			CD33	Acute lymphocytic leukaemia	-0.030379	0.0553086391690423	0.591478893264783
AC008592.4	Acute Myeloid Leukemia	-0.00721419	0.0889547305713925	0.940470250465551			ADAMTS5	Acute lymphocytic leukaemia	-0.0303343	0.0974264640972467	0.771082480476495
AC009495.2	Acute Myeloid Leukemia	0.0462669414139919	0.0536672509377359	0.401365235880766			IDUA	Acute lymphocytic leukaemia	-0.0518012	0.0571964486324806	0.377767205856002
AC009961.3	Acute Myeloid Leukemia	0.089936040440588	0.042780332905177	0.0593659675502666			METAP2	Acute lymphocytic leukaemia	0.20483510527248	0.249882864048337	0.472435229245569
AC011816.1	Acute Myeloid Leukemia	0.149099150647253	0.0643039796038511	0.0317144457660582			APP	Acute lymphocytic leukaemia	0.186186600743851	0.217855844894904	0.455573258522514
AC011893.3	Acute Myeloid Leukemia	0.00049829762384537	0.033486105445149	0.988236751043989			ARSB	Acute lymphocytic leukaemia	-0.520573	0.371714246879037	0.255882243712461
AC013264.2	Acute Myeloid Leukemia	-0.00460315	0.0491285813961732	0.925917237578951			NAAA	Acute lymphocytic leukaemia	0.0323293047038343	0.04468172381364	0.474600482710349
AC016683.6	Acute Myeloid Leukemia	-0.00260062	0.0293037999337906	0.929605446483153			ADAMTS13	Acute lymphocytic leukaemia	0.0725403694808286	0.0394635092404347	0.0826001473610354
AC016757.3	Acute Myeloid Leukemia	0.0526027461925736	0.0501285790692151	0.30446674259383			CTSC	Acute lymphocytic leukaemia	0.218474860553254	0.159878098252496	0.305126203654411
AC017116.8	Acute Myeloid Leukemia	-0.100649	0.114389326212619	0.412774978323885			CTSA	Acute lymphocytic leukaemia	-0.00514363	0.0572354753396674	0.929581239002388
AC021860.1	Acute Myeloid Leukemia	0.0317733532697657	0.0549521951707878	0.569919628123809			CTSS	Acute lymphocytic leukaemia	0.0536847073904826	0.0688897155534127	0.449766296143486
AC022182.3	Acute Myeloid Leukemia	-0.0377641	0.0530057139788439	0.485317541412449			ENTPD1	Acute lymphocytic leukaemia	0.0635545241398672	0.188777278961905	0.758545339109519
AC025335.1	Acute Myeloid Leukemia	-0.0132769	0.0858511045184228	0.883145701111348			F7	Acute lymphocytic leukaemia	-0.0471103	0.0623113199800372	0.474289913586287
AC026740.1	Acute Myeloid Leukemia	-0.0991668	0.198466451738893	0.651657676656109			C2	Acute lymphocytic leukaemia	0.0410277842539898	0.0551008678487393	0.468023098034125
AC068039.4	Acute Myeloid Leukemia	0.0127617893867802	0.0369708789834883	0.732145977605419			TMPRSS15	Acute lymphocytic leukaemia	0.285232157628327	0.186759584031542	0.201406966657833
AC068580.6	Acute Myeloid Leukemia	0.00177544608250945	0.213871887017614	0.994715256251799			WFIKKN1	Acute lymphocytic leukaemia	0.00600149255487751	0.0903820360810104	0.950244652699295
AC073115.7	Acute Myeloid Leukemia	-0.0473788	0.0695923781242555	0.513128419472692			CNDP2	Acute lymphocytic leukaemia	0.108153649627519	0.122950776795694	0.4718301885211
AC087380.14	Acute Myeloid Leukemia	-0.0735036	0.101765024942471	0.510087858649195			GP6	Acute lymphocytic leukaemia	-0.115083	0.0763247492225326	0.175338486982686
AC090804.1	Acute Myeloid Leukemia	0.0617910767991148	0.0929099497125431	0.54239386432353			GNLY	Acute lymphocytic leukaemia	-0.0680097	0.0429696550289906	0.126051259143758
AC091729.9	Acute Myeloid Leukemia	0.000590386096255586	0.052108350649288	0.991030527559441			HAPLN1	Acute lymphocytic leukaemia	0.088805194084333	0.121258132037136	0.496817456526623
AC091814.2	Acute Myeloid Leukemia	-0.00186718	0.0345611863063127	0.95713015510401			IDS	Acute lymphocytic leukaemia	0.101103853903208	0.152157865011962	0.55390207541659
AC093323.3	Acute Myeloid Leukemia	0.00203551632705471	0.0472076224418031	0.966034749781111			KLK12	Acute lymphocytic leukaemia	-0.00577311	0.0836355518776124	0.946328965014454
AC093415.2	Acute Myeloid Leukemia	0.00795196361716483	0.205385859536887	0.975364175433211			KREMEN2	Acute lymphocytic leukaemia	0.299255519050735	0.229973695521199	0.417130841590026
AC099552.2	Acute Myeloid Leukemia	-0.0166205	0.0724559772232449	0.827655633493137			LYVE1	Acute lymphocytic leukaemia	-0.0182502	0.0397647527047222	0.650397011265352
AC104653.1	Acute Myeloid Leukemia	-0.252375	0.171098184707682	0.190650981250227			ASAH2	Acute lymphocytic leukaemia	-0.0876567	0.0473177337491784	0.081395960996848
AC125232.1	Acute Myeloid Leukemia	0.0500564677865324	0.0611386270118992	0.421716967658381			NID1	Acute lymphocytic leukaemia	0.0339013483036327	0.0915544310592142	0.720780874536155
AC141586.5	Acute Myeloid Leukemia	0.0539107739659268	0.0662096896224205	0.442320258994343			PIGR	Acute lymphocytic leukaemia	-0.0645145	0.099767092755155	0.538474562857257
ACAA1	Acute Myeloid Leukemia	-0.0319717	0.132176509515491	0.824460350844164			RET	Acute lymphocytic leukaemia	-0.0191357	0.0845356819548708	0.829882322123384
ACAA2	Acute Myeloid Leukemia	-0.0214574	0.0898032241304909	0.817998548329937			SFRP1	Acute lymphocytic leukaemia	-0.0206749	0.0827359321100608	0.808969827996202
ACACA	Acute Myeloid Leukemia	-0.035924	0.0948765145889247	0.717991704457541			ACP5	Acute lymphocytic leukaemia	-0.0523014	0.061449871195495	0.414617113006527
ACOT1	Acute Myeloid Leukemia	0.0518861588066233	0.0548302026562386	0.360040347590735			CCDC80	Acute lymphocytic leukaemia	-0.352354	0.255613078060723	0.226544679453106
ACTBP8	Acute Myeloid Leukemia	-0.0144	0.0313499126259308	0.647840208850229			WFIKKN2	Acute lymphocytic leukaemia	0.114984733777798	0.0635973857297744	0.108219466440027
ADA	Acute Myeloid Leukemia	0.000406184312459846	0.062604364283137	0.994903477961555			ACAN	Acute lymphocytic leukaemia	-0.0018747	0.141725384697039	0.990276609174804
ADAM19	Acute Myeloid Leukemia	0.036023757811642	0.0358901906865694	0.324763383748287			TGFBI	Acute lymphocytic leukaemia	0.0179479185925792	0.0786251215020911	0.824536782479007
ADAMTSL2	Acute Myeloid Leukemia	0.00271637896863045	0.0799799208595858	0.973574808597538			BGN	Acute lymphocytic leukaemia	-0.039999	0.0711227013995803	0.582155075098973
ADCY10P1	Acute Myeloid Leukemia	-0.013226	0.0348461409377869	0.706061445209017			C1R	Acute lymphocytic leukaemia	-0.0260535	0.118413221233873	0.833148964569698
ADI1	Acute Myeloid Leukemia	-0.0685746	0.0378960330372375	0.0819426328267625			CD109	Acute lymphocytic leukaemia	0.0136483757890843	0.048642282378434	0.781090267033519
ADK	Acute Myeloid Leukemia	0.019612388554272	0.0316803937145845	0.538253240746391			FCER2	Acute lymphocytic leukaemia	0.0867193857172943	0.0413740056673682	0.0478063603088099
ADSS	Acute Myeloid Leukemia	-0.010306	0.0319277093525535	0.748622168132548			CD48	Acute lymphocytic leukaemia	0.10071081424245	0.0586319561175037	0.113838894448839
ADTRP	Acute Myeloid Leukemia	0.0559199264071934	0.0579602417221501	0.352251392384702			CD5L	Acute lymphocytic leukaemia	-0.00357988	0.0515772775633911	0.94539001881175
AEBP1	Acute Myeloid Leukemia	0.0366313276959203	0.0708729093886069	0.613322369304446			CNTN2	Acute lymphocytic leukaemia	-0.0228737	0.0416464974548077	0.591497903689512
AF064858.8	Acute Myeloid Leukemia	-0.268198	0.218160559374038	0.434732771669631			CNTN4	Acute lymphocytic leukaemia	0.0161880867279198	0.0747548128528653	0.832913537508663
AF131215.2	Acute Myeloid Leukemia	-0.0584371	0.0408818031065267	0.155718602328009			CNTN5	Acute lymphocytic leukaemia	0.109584750115714	0.0705002645120105	0.180808289636525
AF131215.9	Acute Myeloid Leukemia	-0.0579134	0.0427663368832983	0.178310707635291			CST7	Acute lymphocytic leukaemia	-0.0598411	0.0553140580550497	0.288890334992225
AFF3	Acute Myeloid Leukemia	-0.00753095	0.0610493749075445	0.902809803635535			DLL4	Acute lymphocytic leukaemia	0.123079927464841	0.148957834973744	0.469231102770903
AGAP4	Acute Myeloid Leukemia	0.028191329727251	0.0606189448046015	0.644770427965472			FCGR2A	Acute lymphocytic leukaemia	-0.248723	0.13367541381126	0.0839267034997019
AGAP7	Acute Myeloid Leukemia	-0.00016518	0.0758650559371484	0.998301759699245			FCGR2B	Acute lymphocytic leukaemia	0.117363595714062	0.274314510395648	0.676343076727504
AGER	Acute Myeloid Leukemia	0.00521283597235952	0.0939620403235216	0.956601152395764			FCGR3B	Acute lymphocytic leukaemia	-0.0186756	0.0429678232951905	0.667551512361113
AHCTF1	Acute Myeloid Leukemia	0.0357425768486126	0.039128911823377	0.371883320936843			FCGR1A	Acute lymphocytic leukaemia	-0.447338	0.9693501420352	0.724750186670873
AIF1	Acute Myeloid Leukemia	-0.0386453	0.0641606032112176	0.559171335663752			FCN2	Acute lymphocytic leukaemia	-0.0880515	0.0922954026077435	0.371849390374107
AIMP2	Acute Myeloid Leukemia	0.00207255923011134	0.0612054199441165	0.973322596042519			GFRA1	Acute lymphocytic leukaemia	0.0928059178377003	0.0916664527136885	0.357789879878385
AKAP10	Acute Myeloid Leukemia	0.0393071454511264	0.0287264070426957	0.176773423628951			SERPIND1	Acute lymphocytic leukaemia	0.0934374892511408	0.105769143715353	0.426913456417725
AKAP11	Acute Myeloid Leukemia	0.139640765973664	0.0634509212223951	0.0480705132005074			IGFBP7	Acute lymphocytic leukaemia	-0.165778	0.125801807176963	0.220134225648938
AKIP1	Acute Myeloid Leukemia	0.0658547068338025	0.0310611206222895	0.0382074812591473			LRIG3	Acute lymphocytic leukaemia	-0.0021999	0.0685219927440553	0.974762263836897
AKT3	Acute Myeloid Leukemia	0.0054709857971971	0.207858999357922	0.981391706259634			LRP8	Acute lymphocytic leukaemia	0.028899488132954	0.148696015090451	0.850744261263087
AKTIP	Acute Myeloid Leukemia	0.0407031226244588	0.0430368640905026	0.352355002643973			LY9	Acute lymphocytic leukaemia	0.0134102993867661	0.0446278116342087	0.768217905758955
ALDH3A2	Acute Myeloid Leukemia	0.0308509482614608	0.0926605149956989	0.747732535205333			MATN2	Acute lymphocytic leukaemia	0.0843693460857175	0.131295375799613	0.548791014685389
ALDH7A1	Acute Myeloid Leukemia	-0.0179748	0.0940432337129089	0.853182491438821			CADM1	Acute lymphocytic leukaemia	-0.0237439	0.11879024817337	0.851324125909597
ALDH8A1	Acute Myeloid Leukemia	0.00535714586054982	0.0446536411557548	0.905464993955449			NTN4	Acute lymphocytic leukaemia	-0.107476	0.0681562635975991	0.153466829355662
ALDOC	Acute Myeloid Leukemia	0.0356572239816927	0.0760098073805969	0.64621039323906			PGLYRP1	Acute lymphocytic leukaemia	0.0431796273977455	0.0780272681756772	0.592151755699381
ALG11	Acute Myeloid Leukemia	-0.0483817	0.0627161279952677	0.458287339260721			RGMB	Acute lymphocytic leukaemia	-0.0112091	0.100328119630644	0.913794447283415
ALG1L10P	Acute Myeloid Leukemia	-0.0505375	0.107613030611766	0.663081536818242			TFPI	Acute lymphocytic leukaemia	0.0299269641557347	0.0863305805227669	0.736034006954451
ALG8	Acute Myeloid Leukemia	0.138126350775401	0.112089676177126	0.285324208785757			THBS2	Acute lymphocytic leukaemia	0.104405998893686	0.0726452690348022	0.184501652709295
ALKBH1	Acute Myeloid Leukemia	-0.036477	0.0543551207935477	0.513085555837552			THBS4	Acute lymphocytic leukaemia	0.0294245963105286	0.0899339525647517	0.765031871666962
ALOX5AP	Acute Myeloid Leukemia	-0.00942364	0.0504398186588068	0.853302288272828			ABL2	Acute lymphocytic leukaemia	0.558321654615629	0.904790323828407	0.648026511972296
AMDHD1	Acute Myeloid Leukemia	0.0328051180768133	0.028537926845195	0.254900307835845			ACY1	Acute lymphocytic leukaemia	0.0228417479860268	0.0809495010137447	0.789118104789022
AMDHD2	Acute Myeloid Leukemia	0.0765262819404045	0.0746902971590133	0.332309942355788			AURKB	Acute lymphocytic leukaemia	0.0617988162067427	0.103911370608619	0.568461564389938
AMFR	Acute Myeloid Leukemia	0.0162267479670088	0.0302292463022557	0.593431401744066			BMP1	Acute lymphocytic leukaemia	-0.0751407	0.2853002141373	0.83605386270271
AMIGO1	Acute Myeloid Leukemia	-0.00728514	0.0683861213696312	0.916673656317525			CAMK2B	Acute lymphocytic leukaemia	-1.13088	1.0557746474589	0.4781431421213
AMT	Acute Myeloid Leukemia	-0.00324644	0.0591046374768193	0.956670982541536			CA6	Acute lymphocytic leukaemia	-0.0126568	0.0496650075647718	0.80230512041694
AMZ2	Acute Myeloid Leukemia	0.00347984435052939	0.0694962387071757	0.960772062184462			CA7	Acute lymphocytic leukaemia	0.065349526423269	0.295856460250131	0.861603988849325
ANAPC13	Acute Myeloid Leukemia	-0.0713319	0.03403793719931	0.0413014815392071			CD207	Acute lymphocytic leukaemia	0.249919741014112	0.186510840213264	0.408148360697373
ANGEL1	Acute Myeloid Leukemia	-0.00272766	0.0427254494714885	0.949566614588077			CHRDL1	Acute lymphocytic leukaemia	0.203471711908079	0.232363423770821	0.414890009275269
ANGEL2	Acute Myeloid Leukemia	0.0581197582793838	0.0432190643727463	0.192400287374249			CTSV	Acute lymphocytic leukaemia	-0.00364078	0.0674748831565495	0.957597993419454
ANGPT2	Acute Myeloid Leukemia	0.0620100371161815	0.153130388130979	0.755050557649057			DKK4	Acute lymphocytic leukaemia	0.0182277793693447	0.0658419750292327	0.786254835786796
ANGPTL6	Acute Myeloid Leukemia	0.0634841237206588	0.0865906463359385	0.487286007085448			ECM1	Acute lymphocytic leukaemia	-0.0839	0.0880702748970394	0.361232955087326
ANK3	Acute Myeloid Leukemia	-0.0187251	0.0315436304352366	0.55528690739556			FETUB	Acute lymphocytic leukaemia	-0.185167	0.0750071870311633	0.0356488768057369
ANKDD1A	Acute Myeloid Leukemia	0.0180124442722372	0.0405615626423922	0.658249020018007			IL17RD	Acute lymphocytic leukaemia	0.0265889401094084	0.108663714916071	0.812855672450381
ANKRD27	Acute Myeloid Leukemia	-0.103849	0.0621916286876439	0.123132853408909			KLK7	Acute lymphocytic leukaemia	0.449025401218156	0.367936579140462	0.437017612732604
ANKRD37	Acute Myeloid Leukemia	-0.0215046	0.195369775606012	0.930207387317998			PRKCI	Acute lymphocytic leukaemia	0.568436286879458	0.714933925932683	0.572357410935312
ANKRD6	Acute Myeloid Leukemia	-0.044482	0.0986157281057695	0.661566560175259			LYN	Acute lymphocytic leukaemia	0.169823297494403	0.448531301071496	0.769580999649048
ANKS6	Acute Myeloid Leukemia	-0.0282624	0.138459206232763	0.857145305420801			PAK3	Acute lymphocytic leukaemia	0.0608598107285844	0.0931529176958803	0.537758166367851
ANKZF1	Acute Myeloid Leukemia	-0.386059	0.329594017467377	0.362130722623056			SERPINA5	Acute lymphocytic leukaemia	-0.122171	0.0769339571382149	0.210491803557747
ANTXRLP1	Acute Myeloid Leukemia	0.155454210598975	0.149446000913884	0.374710185986285			PIK3CG	Acute lymphocytic leukaemia	-0.0113077	0.0999472292816594	0.913098620505677
ANXA11	Acute Myeloid Leukemia	-0.0474546	0.0373674967871715	0.213261764640811			REN	Acute lymphocytic leukaemia	0.0739305069532741	0.11280745770554	0.541180341554992
ANXA3	Acute Myeloid Leukemia	0.0675483971237474	0.0466386017414021	0.166836204962503			STAB2	Acute lymphocytic leukaemia	-0.0564604	0.172732595525756	0.760158610423338
ANXA5	Acute Myeloid Leukemia	-0.0115901	0.0262794451543568	0.660773190189589			TPSB2	Acute lymphocytic leukaemia	-0.0279046	0.0466492802783184	0.556117656478082
AP001007.1	Acute Myeloid Leukemia	-0.0629774	0.0359157103068174	0.0868159709685559			UFC1	Acute lymphocytic leukaemia	0.366910875331093	0.302924843256549	0.439370887267355
AP001046.5	Acute Myeloid Leukemia	-0.0416794	0.136947514605304	0.776040979116776			BCL2A1	Acute lymphocytic leukaemia	-0.342629	0.140448969297762	0.058687883542299
AP001062.7	Acute Myeloid Leukemia	-0.151553	0.0748863783517784	0.082669624922587			IBSP	Acute lymphocytic leukaemia	-0.21694	0.10290434095923	0.0680661883948078
AP002954.4	Acute Myeloid Leukemia	0.0592774320521021	0.0442396247483345	0.187477014474678			CAMK1D	Acute lymphocytic leukaemia	-0.0874649	0.107039032889602	0.451018239461088
AP003774.1	Acute Myeloid Leukemia	-0.00900749	0.0418282284334511	0.830471674132177			CAMK2D	Acute lymphocytic leukaemia	-0.0664059	0.491120760167647	0.9144396802577
AP006621.1	Acute Myeloid Leukemia	0.00234682633269069	0.0366582913552189	0.94919596602836			CA13	Acute lymphocytic leukaemia	-0.0833423	0.0840731150245205	0.344915339380538
AP006621.5	Acute Myeloid Leukemia	5.24322563978088e-05	0.0440546248663322	0.999056612482588			TNFSF8	Acute lymphocytic leukaemia	0.0842086188164762	0.0740823043523979	0.279824429412586
AP1M1	Acute Myeloid Leukemia	0.0367265615605707	0.0537900180145569	0.510255304731676			CMA1	Acute lymphocytic leukaemia	0.0458011227607023	0.246574957839455	0.883080856659912
AP3M1	Acute Myeloid Leukemia	0.061559137825605	0.0614947936205883	0.327220511176545			CSNK2A1	Acute lymphocytic leukaemia	-1.04695	1.44582221358887	0.60100958643177
AP3M2	Acute Myeloid Leukemia	0.0192311115063533	0.0580090241159087	0.743129776594103			EPHA1	Acute lymphocytic leukaemia	-0.266163	0.125708086872187	0.0671058137718428
AP4M1	Acute Myeloid Leukemia	0.0288748787383711	0.0495561315715535	0.564950280889124			EPHA3	Acute lymphocytic leukaemia	0.0597497165211737	0.164117249640945	0.777723239514793
API5	Acute Myeloid Leukemia	-0.0498541	0.161838686380936	0.78716752495437			FN1	Acute lymphocytic leukaemia	0.0803656564454574	0.138600174781054	0.665480113688343
APOBEC3C	Acute Myeloid Leukemia	0.06715669631179	0.0488086017979	0.182693319383274			FN1	Acute lymphocytic leukaemia	0.0352192802674447	0.17454968412738	0.858755824954189
APOL2	Acute Myeloid Leukemia	0.0692093399942558	0.126602966624967	0.639449366771904			FLT3	Acute lymphocytic leukaemia	-0.0723675	0.213288447698269	0.756751303832291
APOLD1	Acute Myeloid Leukemia	0.0673884701534463	0.0639855130231067	0.311439519314632			FSTL3	Acute lymphocytic leukaemia	-0.0555099	0.271517460924409	0.851091465753418
ARC	Acute Myeloid Leukemia	0.0940998589194882	0.104816007816161	0.395526654183028			GZMA	Acute lymphocytic leukaemia	0.00846455435115584	0.0602870449509896	0.890208692158327
ARGLU1	Acute Myeloid Leukemia	0.0105135790948773	0.18500379282371	0.963860411169833			IL15RA	Acute lymphocytic leukaemia	0.0951610654229879	0.117001047913523	0.501454086553327
ARHGAP27	Acute Myeloid Leukemia	0.0114093085536661	0.0341445235344065	0.740154875935478			CXCL8	Acute lymphocytic leukaemia	0.516822324301037	0.255597175568026	0.136390064620577
ARHGAP9	Acute Myeloid Leukemia	-0.032117	0.0477456472956125	0.512938652121642			INSR	Acute lymphocytic leukaemia	-0.0104053	0.0465455934119927	0.82537389237791
ARHGDIB	Acute Myeloid Leukemia	0.124638454534128	0.264183719594615	0.669271293624846			SERPINA4	Acute lymphocytic leukaemia	-0.0266064	0.13528561574875	0.850579802447316
ARHGEF35	Acute Myeloid Leukemia	0.0144795869283909	0.0515904363526523	0.783748208226511			KLK6	Acute lymphocytic leukaemia	-0.00906364	0.122018679837265	0.94241178926545
ARID1A	Acute Myeloid Leukemia	0.00369355241101457	0.0414676180808741	0.930066604599325			LYN	Acute lymphocytic leukaemia	0.195143444542322	0.419746627330586	0.722954667728203
ARIH2	Acute Myeloid Leukemia	0.0691530179264602	0.0734098761905789	0.370782871348163			POSTN	Acute lymphocytic leukaemia	0.00927619719435687	0.110784753278993	0.936518751444083
ARL8B	Acute Myeloid Leukemia	-0.0190057	0.0772914912801709	0.8107357620529			PDGFRB	Acute lymphocytic leukaemia	0.0141465058888133	0.0988477490561391	0.890232618458779
ARMC2	Acute Myeloid Leukemia	0.121980181819122	0.0923760111073944	0.228211156328035			BCAN	Acute lymphocytic leukaemia	0.0597748532427123	0.179132196604926	0.794962164939753
ARMC3	Acute Myeloid Leukemia	0.0514442710290607	0.085445610144984	0.563797437013691			RPS6KA3	Acute lymphocytic leukaemia	-0.152017	0.311722629107794	0.711144102501259
ARNTL	Acute Myeloid Leukemia	-0.04264	0.0357788858613087	0.239466473966936			SELE	Acute lymphocytic leukaemia	0.00265136883315384	0.079999046084873	0.974028829759415
ARPP19	Acute Myeloid Leukemia	0.026155117810139	0.0548208357661461	0.642627742922006			STK16	Acute lymphocytic leukaemia	-0.0482652	0.12436003874451	0.713909896979231
ARRDC2	Acute Myeloid Leukemia	-0.0127836	0.0594026375282522	0.83440752317081			BIRC5	Acute lymphocytic leukaemia	0.0366006726502796	0.149950377622881	0.819173288876391
AS3MT	Acute Myeloid Leukemia	-0.0262466	0.0406353857197849	0.521621089588194			THBS1	Acute lymphocytic leukaemia	0.244874765766511	0.206527610613845	0.289021615544063
ASB1	Acute Myeloid Leukemia	-0.0907932	0.0348796958319686	0.0135952614955397			NTRK1	Acute lymphocytic leukaemia	-0.0427873	0.175877859841397	0.82347564572851
ASB13	Acute Myeloid Leukemia	-0.00291611	0.0371747523237702	0.937963845767424			AGT	Acute lymphocytic leukaemia	0.0747463933192631	0.172010695108314	0.693251465155003
ATAD1	Acute Myeloid Leukemia	-0.191066	0.18669515855265	0.492633933344081			B2M	Acute lymphocytic leukaemia	-0.065823	0.320249974792633	0.856174912894857
ATF3	Acute Myeloid Leukemia	-0.0215767	0.157824942941323	0.89991670083917			FGF1	Acute lymphocytic leukaemia	-0.445525	2.53059972528686	0.889056869110424
ATG12	Acute Myeloid Leukemia	-0.029094	0.0506486567126668	0.574192649891664			CXCL13	Acute lymphocytic leukaemia	0.17311177066356	0.349038804213267	0.653977136581767
ATHL1	Acute Myeloid Leukemia	0.0183771337831393	0.0377237114178993	0.62969221775792			CAT	Acute lymphocytic leukaemia	0.221944892415628	0.186874745194427	0.300669062536676
ATP10D	Acute Myeloid Leukemia	-0.12114	0.0725560635808429	0.112295809068513			CNTF	Acute lymphocytic leukaemia	0.250557147442735	0.195672825085768	0.328808956935389
ATP13A3	Acute Myeloid Leukemia	0.0263631731863551	0.116643075930388	0.835712249823727			CXCL6	Acute lymphocytic leukaemia	-0.0417065	0.0708195288274464	0.57040331607886
ATP1B2	Acute Myeloid Leukemia	-0.0329281	0.0661105475107764	0.631832537099778			IFNA2	Acute lymphocytic leukaemia	0.203733957911858	0.125416746546183	0.351289659124993
ATP2A3	Acute Myeloid Leukemia	0.091450968067701	0.117713005837053	0.466733866234934			IL17B	Acute lymphocytic leukaemia	-0.178531	0.240669460525478	0.535486636868665
ATP6V1E1	Acute Myeloid Leukemia	-0.0561361	0.0544810332159939	0.320305672619685			HAMP	Acute lymphocytic leukaemia	0.134733229882151	0.17235867750294	0.478070813953572
ATP9A	Acute Myeloid Leukemia	0.0388792119843321	0.0328831572285484	0.243719702865625			CCL22	Acute lymphocytic leukaemia	-0.0231941	0.0578847792617014	0.694692820987626
ATP9B	Acute Myeloid Leukemia	0.0743574476364679	0.0520509233486889	0.16313199594618			CXCL12	Acute lymphocytic leukaemia	-0.0805807	0.082706825959104	0.352889121356847
ATPAF2	Acute Myeloid Leukemia	-0.0178172	0.0423490279042791	0.679554767420729			CPB2	Acute lymphocytic leukaemia	-0.123736	0.0700760713790169	0.115433990546712
ATRAID	Acute Myeloid Leukemia	0.0268151714723588	0.0458786644410534	0.564587032877134			CCL17	Acute lymphocytic leukaemia	0.0205630997017057	0.0539332629850609	0.707233449366565
ATXN7L3B	Acute Myeloid Leukemia	-0.0455496	0.0590753576182318	0.454468023465483			TGFB3	Acute lymphocytic leukaemia	-0.0971036	0.304775515039159	0.80364172488248
BACH2	Acute Myeloid Leukemia	-0.0906457	0.0909713608931002	0.35223519175983			DKK1	Acute lymphocytic leukaemia	-0.00532554	0.0602373389474254	0.930803565201687
BAG6	Acute Myeloid Leukemia	0.431324269735365	0.249468739419479	0.225955107442917			ADIPOQ	Acute lymphocytic leukaemia	-0.0241907	0.046916477488577	0.612401103398448
BAIAP2-AS1	Acute Myeloid Leukemia	-0.0540849	0.0449283646925987	0.240405111208077			SERPINA1	Acute lymphocytic leukaemia	-0.108028	0.0690134367755284	0.141518235757019
BAIAP2	Acute Myeloid Leukemia	-0.0237913	0.0338171700164856	0.48543320922731			AHSG	Acute lymphocytic leukaemia	-0.0578833	0.0895228733318537	0.541834417772415
BAK1	Acute Myeloid Leukemia	0.00303442497739137	0.0323686822161495	0.925767792632234			BSG	Acute lymphocytic leukaemia	-0.247191	0.180934121382096	0.230116109929612
BANP	Acute Myeloid Leukemia	0.248382858421865	0.129369715210321	0.150645647375896			BMP10	Acute lymphocytic leukaemia	-0.0837752	0.181778411215816	0.725074377735495
BASP1	Acute Myeloid Leukemia	0.00198035107453529	0.0551688082571962	0.971674849453506			CAMK1	Acute lymphocytic leukaemia	-0.00346697	0.117311566649462	0.977004626128776
BCL9	Acute Myeloid Leukemia	-0.0107019	0.0543111708637165	0.84738395747957			CASP3	Acute lymphocytic leukaemia	0.197783051423449	0.364534995529794	0.641806480712439
BDH1	Acute Myeloid Leukemia	-0.133977	0.114213168751791	0.285235819795116			CHIT1	Acute lymphocytic leukaemia	-0.106553	0.0911193897147696	0.269367684800713
BICD2	Acute Myeloid Leukemia	0.00935799753674326	0.0472735254134653	0.844259643160704			MASP1	Acute lymphocytic leukaemia	0.0572234319146293	0.13890046715683	0.694671754844265
BIN2	Acute Myeloid Leukemia	-0.102327	0.0609169025358707	0.123922996115894			DKK3	Acute lymphocytic leukaemia	0.0168477833912062	0.0679507532538066	0.808053258322091
BLK	Acute Myeloid Leukemia	0.0371777803544193	0.0372024598753699	0.319766827056984			GNS	Acute lymphocytic leukaemia	-0.184729	0.150394158587369	0.286663473152784
BLMH	Acute Myeloid Leukemia	-0.0204792	0.0541528123341223	0.708055199412769			HGFAC	Acute lymphocytic leukaemia	-0.0469763	0.102676381769872	0.656203310153125
BMP1	Acute Myeloid Leukemia	-0.0262038	0.0733210607177825	0.728231771425742			IL22RA1	Acute lymphocytic leukaemia	0.00102908121218558	0.191426663831971	0.996048209425721
BMS1	Acute Myeloid Leukemia	0.106713245831327	0.0970749898640107	0.386288012620671			LGMN	Acute lymphocytic leukaemia	-0.0379329	0.0646164815149154	0.570187624948824
BPI	Acute Myeloid Leukemia	0.0296911897115569	0.0344126407761126	0.393148153650851			MAP2K2	Acute lymphocytic leukaemia	-0.0801956	0.0610042733689938	0.209777362092984
BRAT1	Acute Myeloid Leukemia	0.00495789007130867	0.0537964093270142	0.928091407681019			CDC42BPB	Acute lymphocytic leukaemia	0.0984620329442533	0.339257533026889	0.798967515991511
BRCA2	Acute Myeloid Leukemia	-0.0366501	0.243162242230214	0.89402302003878			LRPAP1	Acute lymphocytic leukaemia	-0.0457083	0.136263093070544	0.741396080518559
BRD7	Acute Myeloid Leukemia	0.0463905122099989	0.0392577895488228	0.246314900546266			KDR	Acute lymphocytic leukaemia	0.0404209805929219	0.0764565815684322	0.603862782864812
BRI3	Acute Myeloid Leukemia	-0.0387271	0.0774182677350141	0.623721803903613			A2M	Acute lymphocytic leukaemia	0.113358300937894	0.0724427898192762	0.16160896694476
BRPF3	Acute Myeloid Leukemia	0.0559901338523276	0.204527033177317	0.809954376318312			PLG	Acute lymphocytic leukaemia	-0.0287094	0.0798022398034342	0.727326140500798
BTBD7	Acute Myeloid Leukemia	-0.070249	0.0732031838301483	0.354743697734367			PYY	Acute lymphocytic leukaemia	-0.302756	0.268860202465024	0.323123068900994
BTD	Acute Myeloid Leukemia	-0.410109	0.363015509138059	0.461269346694686			TEK	Acute lymphocytic leukaemia	0.0598009804706539	0.0650766279742908	0.373692858328889
C10orf118	Acute Myeloid Leukemia	-0.0684849	0.123824108391499	0.678375532543264			ANGPTL4	Acute lymphocytic leukaemia	-0.0380548	0.161925927136952	0.823519732664993
C10orf128	Acute Myeloid Leukemia	-0.0378663	0.0327534870524234	0.252924076616616			CDH2	Acute lymphocytic leukaemia	0.882962897958638	0.555711471130047	0.357612574998444
C10orf68	Acute Myeloid Leukemia	-0.10964	0.111955576408916	0.399641925792282			CA3	Acute lymphocytic leukaemia	0.0333296571561365	0.0879620528082416	0.710439602697303
C10orf88	Acute Myeloid Leukemia	0.0238902758059931	0.0483459709426794	0.625053192208873			CST5	Acute lymphocytic leukaemia	-0.0190106	0.0396197689978743	0.636087566482915
C11orf54	Acute Myeloid Leukemia	-0.101161	0.0442210989133726	0.0293817796626675			ESM1	Acute lymphocytic leukaemia	-0.207227	0.113469789432363	0.117592919414352
C11orf63	Acute Myeloid Leukemia	-0.0201541	0.052930694888131	0.713290265423545			EPHA5	Acute lymphocytic leukaemia	-0.13098	0.142117930188136	0.424694827864506
C12orf76	Acute Myeloid Leukemia	0.0271750145654438	0.0619073423587176	0.668488164330872			FGFR3	Acute lymphocytic leukaemia	0.030149866713164	0.193794809414194	0.890650671557574
C14orf2	Acute Myeloid Leukemia	-0.0751019	0.066158150307341	0.278462399643372			FGR	Acute lymphocytic leukaemia	0.0924045711689686	0.0976865257433899	0.413969839662372
C14orf64	Acute Myeloid Leukemia	-0.0839611	0.16357061920849	0.634790418073001			MAPKAPK3	Acute lymphocytic leukaemia	1.24675734004885	0.88803037413976	0.295471106885157
C15orf38	Acute Myeloid Leukemia	0.0260423215226146	0.0282903486727356	0.362200773677091			MAPK8	Acute lymphocytic leukaemia	0.400477047568283	0.293544839461472	0.265809526933101
C15orf57	Acute Myeloid Leukemia	0.0282176633812055	0.0369498126559931	0.450486455111042			TLR2	Acute lymphocytic leukaemia	-0.123392	0.18744592427032	0.629375284407088
C16orf58	Acute Myeloid Leukemia	-0.126044	0.314262962857209	0.727154572068037			UFM1	Acute lymphocytic leukaemia	-0.0686708	0.348876469041439	0.876273160581715
C16orf80	Acute Myeloid Leukemia	0.066082933050858	0.0565525113071896	0.286918579353338			ZAP70	Acute lymphocytic leukaemia	0.187323932033764	0.171441401843939	0.316469157835287
C17orf103	Acute Myeloid Leukemia	0.0904886388298281	0.0588489626906688	0.146426162732551			DYNLRB1	Acute lymphocytic leukaemia	-0.0273586	0.0741395483903075	0.72478851893383
C17orf66	Acute Myeloid Leukemia	-0.150504	0.244716680966164	0.601198855654522			DNAJB1	Acute lymphocytic leukaemia	0.125838442424559	0.215401518359638	0.590443678289955
C17orf75	Acute Myeloid Leukemia	0.0801896157779295	0.0619079621611423	0.209968064586814			NACA	Acute lymphocytic leukaemia	-0.0185696	0.313796517953697	0.958191914716829
C17orf76-AS1	Acute Myeloid Leukemia	-0.0501751	0.0637353207825524	0.445256909018005			PRDX1	Acute lymphocytic leukaemia	0.140026039995329	0.151355168761675	0.423124917979003
C17orf80	Acute Myeloid Leukemia	0.0804040367272823	0.0475347671901811	0.103691955849465			ACP1	Acute lymphocytic leukaemia	0.094201425507486	0.0777462705183167	0.264954741683619
C17orf97	Acute Myeloid Leukemia	0.0291070110137512	0.0251691965963465	0.252079475829636			RPS7	Acute lymphocytic leukaemia	0.206414874010943	0.32221798297658	0.63729021126326
C18orf54	Acute Myeloid Leukemia	0.0317064931090855	0.0731594922457046	0.682792463522014			SBDS	Acute lymphocytic leukaemia	-0.0055934	0.138145680410062	0.974237861612494
C19orf12	Acute Myeloid Leukemia	0.0649221295587517	0.0272485990798034	0.0214765394667401			TPO	Acute lymphocytic leukaemia	0.117116864966458	0.101053379098244	0.330343938028779
C19orf38	Acute Myeloid Leukemia	-0.151406	0.163926610741921	0.525264902026447			UBE2L3	Acute lymphocytic leukaemia	-0.327982	0.612806481181563	0.687152485871649
C19orf40	Acute Myeloid Leukemia	0.00685522570556903	0.0365215561829467	0.852332284593775			DYNLL1	Acute lymphocytic leukaemia	0.00042640159779786	0.221160540133637	0.998772586865599
C19orf44	Acute Myeloid Leukemia	-0.0859652	0.0632715707876848	0.204107096272798			KPNB1	Acute lymphocytic leukaemia	0.451069793857823	0.357964503217544	0.3347466567364
C19orf60	Acute Myeloid Leukemia	-0.014965	0.0423646073710769	0.725716578605525			LMNB1	Acute lymphocytic leukaemia	0.355699240527838	0.283667073377827	0.428578424314188
C19orf66	Acute Myeloid Leukemia	0.0149465725035179	0.0615371938911583	0.811615534060152			NAGK	Acute lymphocytic leukaemia	-0.144487	0.110567133319581	0.282436814788664
C1orf145	Acute Myeloid Leukemia	0.108928035544524	0.0991306531574195	0.313966058130305			PDXP	Acute lymphocytic leukaemia	-0.26994	0.602817982290352	0.731970081489849
C1orf174	Acute Myeloid Leukemia	-0.0254884	0.0562867304950442	0.655103742380541			PSMD7	Acute lymphocytic leukaemia	1.17855906335832	0.515985397140456	0.262714474585754
C1orf21	Acute Myeloid Leukemia	0.0641968301693482	0.0772798803062362	0.443983949203509			SKP1	Acute lymphocytic leukaemia	0.285939242126075	2.0706468625955	0.912640563052627
C1QB	Acute Myeloid Leukemia	0.0278014447158099	0.0358360517270575	0.44267152929408			SNX4	Acute lymphocytic leukaemia	0.0307349118748282	0.149383659438406	0.847037283088716
C1QTNF6	Acute Myeloid Leukemia	-0.0717659	0.0584307967586769	0.23518282527709			HSPA1A	Acute lymphocytic leukaemia	-0.00460707	0.181035118606591	0.981295378893567
C1RL-AS1	Acute Myeloid Leukemia	-0.0210336	0.0582480628437507	0.723057424420925			AGER	Acute lymphocytic leukaemia	-0.0202167	0.0319270613531779	0.529265756784777
C20orf24	Acute Myeloid Leukemia	0.0161123611444861	0.11639856556708	0.898674567481909			BPI	Acute lymphocytic leukaemia	0.0776568194880971	0.0808265589808812	0.361761056055912
C20orf27	Acute Myeloid Leukemia	-0.00022472	0.0315015430745589	0.994351199205527			C6	Acute lymphocytic leukaemia	0.0666115449846943	0.146336916684655	0.668053943441752
C22orf26	Acute Myeloid Leukemia	0.0903984520173941	0.300922332147208	0.814216561137105			CCL24	Acute lymphocytic leukaemia	0.130214423657596	0.181171915815853	0.5469324431862
C22orf29	Acute Myeloid Leukemia	0.0154837383152098	0.0526428469968963	0.771188890248867			CFB	Acute lymphocytic leukaemia	0.0106910254736134	0.0532362262944585	0.844502446916939
C22orf32	Acute Myeloid Leukemia	0.0617206989260841	0.0384214478452756	0.11625091760364			GZMB	Acute lymphocytic leukaemia	0.485415146865563	0.286133266732883	0.33908542894671
C2orf15	Acute Myeloid Leukemia	-0.0180628	0.0385585878498251	0.642366974953606			IL25	Acute lymphocytic leukaemia	0.161041019460295	0.314898255710328	0.699050018597279
C3orf38	Acute Myeloid Leukemia	-0.0162987	0.184200158092779	0.937554631700094			IL7	Acute lymphocytic leukaemia	0.652244497977141	1.05254588022013	0.646824667376413
C4A	Acute Myeloid Leukemia	0.002715389853439	0.0521573113879957	0.958971716148329			CXCL10	Acute lymphocytic leukaemia	0.00124794293337243	0.160875377540228	0.994297716162954
C4B	Acute Myeloid Leukemia	-0.0599022	0.0429650827050407	0.177177323197167			XCL1	Acute lymphocytic leukaemia	0.272693582678605	0.206961069464623	0.279222801291404
C4orf21	Acute Myeloid Leukemia	0.0788363007224569	0.0388677280990951	0.0528870442632131			NTF3	Acute lymphocytic leukaemia	0.199336154280211	0.252366584126828	0.473793691307686
C4orf33	Acute Myeloid Leukemia	0.0574007750508221	0.0503238083547561	0.265279405082358			PAPPA	Acute lymphocytic leukaemia	0.0274035804036142	0.0518674152595265	0.603077994920399
C5	Acute Myeloid Leukemia	0.0557158575753473	0.0300786627283371	0.0686633131356024			PDGFB	Acute lymphocytic leukaemia	-0.193413	0.457766802082705	0.701105135705803
C5orf55	Acute Myeloid Leukemia	-0.222044	0.150896460975136	0.191569494692981			PLG	Acute lymphocytic leukaemia	-0.0128324	0.130603879276394	0.927927366613464
C6orf211	Acute Myeloid Leukemia	0.0650163883586265	0.0803209176548164	0.449153076827014			PLG	Acute lymphocytic leukaemia	-0.0760283	0.0805333440462479	0.381584580670419
C6orf48	Acute Myeloid Leukemia	0.0630827805509094	0.0465753289265023	0.192360158075954			KLKB1	Acute lymphocytic leukaemia	-0.073084	0.0785844493953924	0.379576025148573
C7orf43	Acute Myeloid Leukemia	-0.0207987	0.0503761211747241	0.684324757479306			SERPINA3	Acute lymphocytic leukaemia	-0.0283111	0.111903027482022	0.810342868765563
C8orf40	Acute Myeloid Leukemia	-0.0117444	0.0460025434266662	0.800077208956952			SELP	Acute lymphocytic leukaemia	-0.0407165	0.0738162562767738	0.60497114887504
C9orf156	Acute Myeloid Leukemia	-0.0156002	0.0342005036744492	0.650585389487442			TNC	Acute lymphocytic leukaemia	-0.0301593	0.0601648245627695	0.623964902824112
C9orf174	Acute Myeloid Leukemia	-0.0891488	0.0823928976479029	0.320811351142893			TGFB2	Acute lymphocytic leukaemia	-0.075081	0.211239881511447	0.782591752096482
CAB39L	Acute Myeloid Leukemia	-0.0515756	0.0485357817212365	0.301270091978273			F2	Acute lymphocytic leukaemia	-0.00793008	0.0724904166162771	0.915289595618433
CABP5	Acute Myeloid Leukemia	-0.0392932	0.048930894884357	0.428967487114441			PLAU	Acute lymphocytic leukaemia	-0.0170654	0.0693028984500711	0.80862440916092
CACNA1H	Acute Myeloid Leukemia	-0.163578	0.072324918425326	0.0865163091667699			CFH	Acute lymphocytic leukaemia	-0.332593	0.738933909873431	0.73075065181464
CACUL1	Acute Myeloid Leukemia	0.0203750675931117	0.0716166615596864	0.780507273012195			MMP2	Acute lymphocytic leukaemia	-0.0187521	0.330629406654149	0.958337312676845
CAMK1D	Acute Myeloid Leukemia	0.00720685417884238	0.0306163507978551	0.814972206551188			EIF4EBP2	Acute lymphocytic leukaemia	0.120562932320244	0.349202692758019	0.788362924926899
CAMK2N1	Acute Myeloid Leukemia	0.0411637942890571	0.0516501257213865	0.445980929527605			PGD	Acute lymphocytic leukaemia	-0.132039	0.121432866737323	0.390469543028709
CAMTA1	Acute Myeloid Leukemia	-0.0198599	0.050012893660946	0.696889423409074			AKR7A2	Acute lymphocytic leukaemia	-0.0380645	0.112262767239053	0.751612695584992
CAPG	Acute Myeloid Leukemia	-0.011298	0.0342266567900135	0.743096625752311			AKR1A1	Acute lymphocytic leukaemia	-0.105245	0.0792443562734323	0.216837342326889
CAPNS1	Acute Myeloid Leukemia	-0.0523562	0.0632970274490816	0.420317412791367			CFL1	Acute lymphocytic leukaemia	0.135424826189204	0.387170560967219	0.785790483165196
CAPRIN2	Acute Myeloid Leukemia	-0.122096	0.0678819465564297	0.0953224067594896			EPS15L1	Acute lymphocytic leukaemia	0.495056368893622	0.290434386163854	0.230396131923412
CARD9	Acute Myeloid Leukemia	-0.0554817	0.0440738526444595	0.214881339071297			FER	Acute lymphocytic leukaemia	-0.184712	0.268835482523914	0.563003679780389
CARM1	Acute Myeloid Leukemia	0.0515810635454907	0.138170069096125	0.718611717308158			SYNCRIP	Acute lymphocytic leukaemia	-0.069593	0.111434880105086	0.56614270438926
CASP3	Acute Myeloid Leukemia	0.0356080086680538	0.0408039132675209	0.394340001272584			EIF4G2	Acute lymphocytic leukaemia	0.329241400933046	0.314934363363571	0.485863103927936
CASP9	Acute Myeloid Leukemia	0.00591622426864053	0.0494890071894087	0.905880697700523			IGF1R	Acute lymphocytic leukaemia	0.0370721784591792	0.0604670870087829	0.554987173368396
CAT	Acute Myeloid Leukemia	-0.00763084	0.0305846818507033	0.804393245113169			IL1RL1	Acute lymphocytic leukaemia	0.0100940936253922	0.0371158347415175	0.787296017257462
CATSPER2	Acute Myeloid Leukemia	-0.0787114	0.0975633460334861	0.478827601716304			LCMT1	Acute lymphocytic leukaemia	-0.0292372	0.126563370150683	0.83878920118952
CBR3	Acute Myeloid Leukemia	0.0100139616288171	0.0279489190757158	0.721661492435038			L1CAM	Acute lymphocytic leukaemia	-0.0239803	0.0634128224090085	0.710608032517433
CCDC101	Acute Myeloid Leukemia	0.101731965728202	0.039821866776753	0.0135370897488377			NUDCD3	Acute lymphocytic leukaemia	-0.902562	0.955345810440321	0.518081638101714
CCDC112	Acute Myeloid Leukemia	-0.0754717	0.0807159457016503	0.380898889564347			PA2G4	Acute lymphocytic leukaemia	0.107315506687817	0.243267169297936	0.677532392292617
CCDC115	Acute Myeloid Leukemia	-0.00472881	0.0531087134476587	0.930154927799909			PFDN5	Acute lymphocytic leukaemia	0.0388898701305678	0.146252320565025	0.803452211851191
CCDC13-AS1	Acute Myeloid Leukemia	-0.0297637	0.0912042961504601	0.753706207014225			GPI	Acute lymphocytic leukaemia	-0.0899453	0.1702895981157	0.65011973385355
CCDC13	Acute Myeloid Leukemia	-0.0356866	0.0705842703176536	0.623122762724539			PEBP1	Acute lymphocytic leukaemia	-0.0806675	0.11195715415086	0.498301623273806
CCDC17	Acute Myeloid Leukemia	0.157414142813066	0.0940397320399369	0.155003443291769			P4HB	Acute lymphocytic leukaemia	-0.166078	0.181685594666312	0.457160332626516
CCDC23	Acute Myeloid Leukemia	-0.0040153	0.0297132304242438	0.892882070698214			PSMA2	Acute lymphocytic leukaemia	0.0370505423576012	0.113435782333581	0.765414853181938
CCDC6	Acute Myeloid Leukemia	-0.0615741	0.106436042109229	0.588000558896659			NAPA	Acute lymphocytic leukaemia	-0.754945	0.744615361104692	0.495614811601503
CCDC7	Acute Myeloid Leukemia	0.141870095620282	0.132367996514514	0.325022084608495			SPHK1	Acute lymphocytic leukaemia	0.26358059309158	0.126085166527641	0.104771916014671
CCDC71	Acute Myeloid Leukemia	-0.0340668	0.107901293050722	0.768000636745009			SPON1	Acute lymphocytic leukaemia	-0.0169859	0.0708033232906075	0.818391793048742
CCNT2	Acute Myeloid Leukemia	0.071365612933296	0.0523013897432155	0.187565520166745			TK1	Acute lymphocytic leukaemia	0.117007211404603	0.177950109516535	0.578398707718958
CCR4	Acute Myeloid Leukemia	-0.00197512	0.0563521746622077	0.97261644239891			DCTPP1	Acute lymphocytic leukaemia	-0.474473	0.283854170042151	0.155478381084979
CCRN4L	Acute Myeloid Leukemia	0.291799756040988	0.297416463418758	0.506068398244173			CST2	Acute lymphocytic leukaemia	-0.0116167	0.0491071874620063	0.815827226204606
[truncated: 10,699 more rows]
