# Supplementary material for: Study on the Gene Regulatory Effects in Leukemia Based on Multi-omics Mendelian Randomization, Network Pharmacology, and Functional Validation
Source: Research Square preprint supplement (doi:10.21203/rs.3.rs-7510513/v1), 2025-09-25
Supplement: Supplementary file 2 [file 577793f5711ff4b55661fb71.xlsx]

## Sheet: Supplementary Table 4
Supplementary Table 4. Results of the MR-PRESSO test
Global_Test_Pvalue	Exposure-eQTL	Outcome			Global_Test_Pvalue	Exposure-pQTL	Outcome
0.439	A2MP1	Acute Lymphoblastic Leukemia			0.236	10000_28_CRYBB2_CRBB2	Acute Lymphoblastic Leukemia
0.918	AARS	Acute Lymphoblastic Leukemia			0.795	10001_7_RAF1_c_Raf	Acute Lymphoblastic Leukemia
0.59	ABCA2	Acute Lymphoblastic Leukemia			0.704	10003_15_ZNF41_ZNF41	Acute Lymphoblastic Leukemia
0.947	ABCB9	Acute Lymphoblastic Leukemia			0.196	10008_43_GUCA1A_GUC1A	Acute Lymphoblastic Leukemia
0.745	ABT1	Acute Lymphoblastic Leukemia			0.254	10011_65_OCRL_OCRL	Acute Lymphoblastic Leukemia
0.757	AC004696.2	Acute Lymphoblastic Leukemia			0.544	10012_5_SPDEF_SPDEF	Acute Lymphoblastic Leukemia
0.751	AC005154.6	Acute Lymphoblastic Leukemia			0.606	10014_31_SNAI2_SLUG	Acute Lymphoblastic Leukemia
0.308	AC005488.1	Acute Lymphoblastic Leukemia			0.368	10023_32_VDR_VDR	Acute Lymphoblastic Leukemia
0.938	AC005682.6	Acute Lymphoblastic Leukemia			0.462	10024_44_HOGA1_HOGA1	Acute Lymphoblastic Leukemia
0.672	AC006129.4	Acute Lymphoblastic Leukemia			0.175	10035_6_DUSP4_DUS4	Acute Lymphoblastic Leukemia
0.73	AC009299.3	Acute Lymphoblastic Leukemia			0.455	10036_201_ZHX3_ZHX3	Acute Lymphoblastic Leukemia
0.725	AC009404.2	Acute Lymphoblastic Leukemia			0.671	10037_98_SIGLEC12_SIG12	Acute Lymphoblastic Leukemia
0.961	AC009506.1	Acute Lymphoblastic Leukemia			0.688	10041_3_HNF4A_HNF4A	Acute Lymphoblastic Leukemia
0.794	AC011816.1	Acute Lymphoblastic Leukemia			0.501	10044_12_WNT10A_WN10A	Acute Lymphoblastic Leukemia
0.165	AC012309.5	Acute Lymphoblastic Leukemia			0.654	10046_55_BIRC2_cIAP_1	Acute Lymphoblastic Leukemia
0.488	AC016773.1	Acute Lymphoblastic Leukemia			0.14	10047_12_NCF2_NCF_2	Acute Lymphoblastic Leukemia
0.324	AC018638.1	Acute Lymphoblastic Leukemia			0.575	10048_7_CBFB_PEBB	Acute Lymphoblastic Leukemia
0.77	AC018755.15	Acute Lymphoblastic Leukemia			0.756	10056_5_FOXM1_FOXM1	Acute Lymphoblastic Leukemia
0.502	AC018755.16	Acute Lymphoblastic Leukemia			0.315	10064_12_RBBP9_RBBP9	Acute Lymphoblastic Leukemia
0.73	AC018804.6	Acute Lymphoblastic Leukemia			0.383	10081_17_SATB2_SATB2	Acute Lymphoblastic Leukemia
0.902	AC068831.10	Acute Lymphoblastic Leukemia			0.144	10082_251_NEFL_NFL	Acute Lymphoblastic Leukemia
0.952	AC079325.6	Acute Lymphoblastic Leukemia			0.167	10085_25_STAR_STAR	Acute Lymphoblastic Leukemia
0.406	AC079776.7	Acute Lymphoblastic Leukemia			0.384	10088_37_APRT_APT	Acute Lymphoblastic Leukemia
0.954	AC083949.1	Acute Lymphoblastic Leukemia			0.811	10339_48_ENO2_NSE	Acute Lymphoblastic Leukemia
0.469	AC087793.1	Acute Lymphoblastic Leukemia			0.082	10344_334_IL10RA_IL_10_Ra	Acute Lymphoblastic Leukemia
0.779	AC093609.1	Acute Lymphoblastic Leukemia			0.866	10346_5_STAT3_STAT3	Acute Lymphoblastic Leukemia
0.444	AC108488.3	Acute Lymphoblastic Leukemia			0.4	10356_21_JUN_c_Jun	Acute Lymphoblastic Leukemia
0.359	AC127904.2	Acute Lymphoblastic Leukemia			0.673	10363_13_SMAD3_SMAD3	Acute Lymphoblastic Leukemia
0.848	AC131056.3	Acute Lymphoblastic Leukemia			0.294	10366_11_PDGFRA_PDGFRA	Acute Lymphoblastic Leukemia
0.587	AC131971.1	Acute Lymphoblastic Leukemia			0.794	10370_21_STAT1_STAT1	Acute Lymphoblastic Leukemia
0.548	AC144831.1	Acute Lymphoblastic Leukemia			0.131	10372_18_STAT6_STAT6	Acute Lymphoblastic Leukemia
0.907	ACACB	Acute Lymphoblastic Leukemia			0.202	10390_21_ZNRF3_ZNRF3	Acute Lymphoblastic Leukemia
0.55	ACAD8	Acute Lymphoblastic Leukemia			0.523	10391_1_ANGPTL3_ANGL3	Acute Lymphoblastic Leukemia
0.808	ACBD4	Acute Lymphoblastic Leukemia			0.365	10419_1_SCARA5_SCAR5	Acute Lymphoblastic Leukemia
0.687	ACD	Acute Lymphoblastic Leukemia			0.453	10426_21_GOSR2_GOSR2	Acute Lymphoblastic Leukemia
0.843	ACOT7	Acute Lymphoblastic Leukemia			0.418	10435_2_AGA_ASPG	Acute Lymphoblastic Leukemia
0.592	ACP6	Acute Lymphoblastic Leukemia			0.415	10438_19_CSF2RA_CSF2R	Acute Lymphoblastic Leukemia
0.533	ACSF2	Acute Lymphoblastic Leukemia			0.376	10440_26_CLMP_ACAM	Acute Lymphoblastic Leukemia
0.579	ACSM1	Acute Lymphoblastic Leukemia			0.093	10442_1_TMEM190_TM190	Acute Lymphoblastic Leukemia
0.977	ACSS1	Acute Lymphoblastic Leukemia			0.397	10445_20_APOM_ApoM	Acute Lymphoblastic Leukemia
0.934	ACTBP8	Acute Lymphoblastic Leukemia			0.465	10449_31_SHISA2_TMM46	Acute Lymphoblastic Leukemia
0.469	ACTR1B	Acute Lymphoblastic Leukemia			0.658	10451_11_NUCB1_NUCB1	Acute Lymphoblastic Leukemia
0.867	ACTR5	Acute Lymphoblastic Leukemia			0.592	10455_196_IL31_IL_31	Acute Lymphoblastic Leukemia
0.982	ACVR1B	Acute Lymphoblastic Leukemia			0.578	10464_6_ANTXR1_ANTR1	Acute Lymphoblastic Leukemia
0.721	ACYP2	Acute Lymphoblastic Leukemia			0.267	10499_1_TMEM106A_T106A	Acute Lymphoblastic Leukemia
0.637	ADAM15	Acute Lymphoblastic Leukemia			0.733	10507_166_ACRV1_sperm_protein_10	Acute Lymphoblastic Leukemia
0.122	ADAM19	Acute Lymphoblastic Leukemia			0.595	10512_13_CSF2RB_IL3RB	Acute Lymphoblastic Leukemia
0.992	ADAM28	Acute Lymphoblastic Leukemia			0.541	10514_5_PTGDS_PGD2_synthase	Acute Lymphoblastic Leukemia
0.305	ADAMTS13	Acute Lymphoblastic Leukemia			0.791	10521_10_MXRA8_MXRA8	Acute Lymphoblastic Leukemia
0.446	ADAMTSL4	Acute Lymphoblastic Leukemia			0.445	10527_22_DHX9_DHX9	Acute Lymphoblastic Leukemia
0.762	ADAR	Acute Lymphoblastic Leukemia			0.357	10539_30_CD99L2_C99L2	Acute Lymphoblastic Leukemia
0.207	ADARB2	Acute Lymphoblastic Leukemia			0.473	10546_2_TSPEAR_TSEAR	Acute Lymphoblastic Leukemia
0.853	ADIPOR1	Acute Lymphoblastic Leukemia			0.348	10550_37_BMPR1B_BMP_RIB	Acute Lymphoblastic Leukemia
0.614	ADK	Acute Lymphoblastic Leukemia			0.633	10551_7_LAT_LAT	Acute Lymphoblastic Leukemia
0.796	ADO	Acute Lymphoblastic Leukemia			0.527	10557_6_TEX29_TEX29	Acute Lymphoblastic Leukemia
0.893	ADRB1	Acute Lymphoblastic Leukemia			0.031	10558_26_PCDH9_PCDH9	Acute Lymphoblastic Leukemia
0.721	ADSS	Acute Lymphoblastic Leukemia			0.44	10561_5_PGLYRP3_PGRP_I_alpha	Acute Lymphoblastic Leukemia
0.809	ADTRP	Acute Lymphoblastic Leukemia			0.073	10565_19_SLITRK3_SLIK3	Acute Lymphoblastic Leukemia
0.358	AEN	Acute Lymphoblastic Leukemia			0.63	10569_28_SCGB1A1_Urinary_protein_1	Acute Lymphoblastic Leukemia
0.816	AFF4	Acute Lymphoblastic Leukemia			0.708	10571_14_MGAT1_MGAT1	Acute Lymphoblastic Leukemia
0.51	AGAP1	Acute Lymphoblastic Leukemia			0.34	10572_65_CST8_CST8	Acute Lymphoblastic Leukemia
0.566	AGXT2L2	Acute Lymphoblastic Leukemia			0.789	10574_10_AXL_AXL	Acute Lymphoblastic Leukemia
0.083	AHI1	Acute Lymphoblastic Leukemia			0.455	10575_31_PUF60_PUF60	Acute Lymphoblastic Leukemia
0.063	AIMP2	Acute Lymphoblastic Leukemia			0.336	10580_14_SFTA2_SFTA2	Acute Lymphoblastic Leukemia
0.903	AK3	Acute Lymphoblastic Leukemia			0.476	10582_36_POMK_SG196	Acute Lymphoblastic Leukemia
0.499	AK5	Acute Lymphoblastic Leukemia			0.204	10584_7_NDUFS4_NDUS4	Acute Lymphoblastic Leukemia
0.907	AKAP12	Acute Lymphoblastic Leukemia			0.698	10600_24_CLGN_CLGN	Acute Lymphoblastic Leukemia
0.631	AKAP6	Acute Lymphoblastic Leukemia			0.792	10603_1_HTN3_HIS3	Acute Lymphoblastic Leukemia
0.68	AKD1	Acute Lymphoblastic Leukemia			0.731	10605_22_APMAP_APMAP	Acute Lymphoblastic Leukemia
0.856	AKIP1	Acute Lymphoblastic Leukemia			0.459	10608_9_HTN1_HIS1	Acute Lymphoblastic Leukemia
0.451	AKIRIN2	Acute Lymphoblastic Leukemia			0.889	10612_18_PLOD3_PLOD3	Acute Lymphoblastic Leukemia
0.496	AKR1E2	Acute Lymphoblastic Leukemia			0.068	10615_18_MPZ_MYP0	Acute Lymphoblastic Leukemia
0.837	AKT1	Acute Lymphoblastic Leukemia			0.124	10620_21_MSMB_PSP_94	Acute Lymphoblastic Leukemia
0.849	AKTIP	Acute Lymphoblastic Leukemia			0.996	10621_26_PRR16_PRR16	Acute Lymphoblastic Leukemia
0.704	AL161915.1	Acute Lymphoblastic Leukemia			0.078	10627_87_APLP2_APLP2	Acute Lymphoblastic Leukemia
0.479	AL513477.1	Acute Lymphoblastic Leukemia			0.411	10630_5_HTATIP2_HTAI2	Acute Lymphoblastic Leukemia
0.759	ALDH1A1	Acute Lymphoblastic Leukemia			0.138	10643_16_OLFM3_NOE3	Acute Lymphoblastic Leukemia
0.505	ALG1L	Acute Lymphoblastic Leukemia			0.441	10647_18_ASCC1_ASCC1	Acute Lymphoblastic Leukemia
0.461	ALG1L10P	Acute Lymphoblastic Leukemia			0.848	10666_7_GNPTG_GNPTG	Acute Lymphoblastic Leukemia
0.449	ALG1L6P	Acute Lymphoblastic Leukemia			0.576	10672_75_SFTPB_SP_B	Acute Lymphoblastic Leukemia
0.787	ALG8	Acute Lymphoblastic Leukemia			0.353	10675_223_TMX2_TMX2	Acute Lymphoblastic Leukemia
0.818	ALKBH8	Acute Lymphoblastic Leukemia			0.137	10677_9_NDUFB4_NDUB4	Acute Lymphoblastic Leukemia
0.203	AMACR	Acute Lymphoblastic Leukemia			0.504	10693_43_KLRG2_KLRG2	Acute Lymphoblastic Leukemia
0.82	AMIGO2	Acute Lymphoblastic Leukemia			0.345	10702_1_COL28A1_COSA1	Acute Lymphoblastic Leukemia
0.706	ANGPTL6	Acute Lymphoblastic Leukemia			0.88	10703_203_SUDS3_SDS3	Acute Lymphoblastic Leukemia
0.611	ANK1	Acute Lymphoblastic Leukemia			0.987	10708_3_GNRH2_GON2	Acute Lymphoblastic Leukemia
0.665	ANKMY2	Acute Lymphoblastic Leukemia			0.454	10714_7_ACE_ACE	Acute Lymphoblastic Leukemia
0.175	ANKRA2	Acute Lymphoblastic Leukemia			0.984	10716_35_PSMD5_PSMD5	Acute Lymphoblastic Leukemia
0.643	ANKRD10-IT1	Acute Lymphoblastic Leukemia			0.9	10731_10_HS3ST5_HS3S5	Acute Lymphoblastic Leukemia
0.611	ANKRD10	Acute Lymphoblastic Leukemia			0.078	10734_339_GAL3ST2_G3ST2	Acute Lymphoblastic Leukemia
0.773	ANKRD18A	Acute Lymphoblastic Leukemia			0.255	10748_216_PCDHB2_PCDB2	Acute Lymphoblastic Leukemia
0.31	ANKRD26	Acute Lymphoblastic Leukemia			0.561	10752_8_CDYL2_CDYL2	Acute Lymphoblastic Leukemia
0.009	ANKRD34B	Acute Lymphoblastic Leukemia			0.995	10754_113_PROK2_Prokineticin_2	Acute Lymphoblastic Leukemia
0.891	ANKRD36	Acute Lymphoblastic Leukemia			0.572	10758_2_KERA_KERA	Acute Lymphoblastic Leukemia
0.3	ANKRD9	Acute Lymphoblastic Leukemia			0.48	10760_107_GRIA4_GRIA4	Acute Lymphoblastic Leukemia
0.626	ANKZF1	Acute Lymphoblastic Leukemia			0.452	10762_2_KLRG2_KLRG2	Acute Lymphoblastic Leukemia
0.79	ANO9	Acute Lymphoblastic Leukemia			0.739	10772_21_CSGALNACT2_CGAT2	Acute Lymphoblastic Leukemia
0.477	ANXA3	Acute Lymphoblastic Leukemia			0.202	10781_19_CLEC4G_CLC4G	Acute Lymphoblastic Leukemia
0.571	ANXA5	Acute Lymphoblastic Leukemia			0.798	10800_15_SERPINH1_Collagen_binding_protein	Acute Lymphoblastic Leukemia
0.732	AP001007.1	Acute Lymphoblastic Leukemia			0.768	10809_14_KLRB1_KLRB1	Acute Lymphoblastic Leukemia
0.682	AP001189.4	Acute Lymphoblastic Leukemia			0.446	10814_7_CD1A_CD1A	Acute Lymphoblastic Leukemia
0.926	AP001469.9	Acute Lymphoblastic Leukemia			0.725	10815_2_HABP4_HABP4	Acute Lymphoblastic Leukemia
0.761	AP001610.5	Acute Lymphoblastic Leukemia			0.498	10816_150_PILRA_PILRA_isoform_FDF03_M14	Acute Lymphoblastic Leukemia
0.546	AP001625.6	Acute Lymphoblastic Leukemia			0.183	10817_26_TOMM20L_TO20L	Acute Lymphoblastic Leukemia
0.829	AP001816.1	Acute Lymphoblastic Leukemia			0.295	10818_36_SMPD1_ASM	Acute Lymphoblastic Leukemia
0.971	AP002954.4	Acute Lymphoblastic Leukemia			0.606	10832_24_B4GALT6_B4GT6	Acute Lymphoblastic Leukemia
0.987	AP1S3	Acute Lymphoblastic Leukemia			0.843	10833_64_HHIP_HHIP	Acute Lymphoblastic Leukemia
0.681	APBB1IP	Acute Lymphoblastic Leukemia			0.254	10835_25_A4GNT_A4GCT	Acute Lymphoblastic Leukemia
0.613	APCDD1	Acute Lymphoblastic Leukemia			0.298	10842_7_GCNT4_GCNT4	Acute Lymphoblastic Leukemia
0.851	ARF3	Acute Lymphoblastic Leukemia			0.458	10847_1_SIGLEC15_SIG15	Acute Lymphoblastic Leukemia
0.206	ARFGAP3	Acute Lymphoblastic Leukemia			0.673	10851_77_EBI3_IL27B	Acute Lymphoblastic Leukemia
0.595	ARHGAP11A	Acute Lymphoblastic Leukemia			0.758	10852_114_HNRNPDL_HNRDL	Acute Lymphoblastic Leukemia
0.697	ARHGAP15	Acute Lymphoblastic Leukemia			0.311	10880_38_FAM163B_F163B	Acute Lymphoblastic Leukemia
0.778	ARHGAP18	Acute Lymphoblastic Leukemia			0.389	10882_12_DSC1_Desmocollin_1	Acute Lymphoblastic Leukemia
0.543	ARHGEF17	Acute Lymphoblastic Leukemia			0.912	10885_36_C6orf89_CF089	Acute Lymphoblastic Leukemia
0.779	ARHGEF35	Acute Lymphoblastic Leukemia			0.373	10889_2_MRAP2_MRAP2	Acute Lymphoblastic Leukemia
0.349	ARHGEF40	Acute Lymphoblastic Leukemia			0.887	10892_8_OSMR_OSMR	Acute Lymphoblastic Leukemia
0.508	ARID5A	Acute Lymphoblastic Leukemia			0.311	10900_272_STMN2_STMN2	Acute Lymphoblastic Leukemia
0.631	ARL6IP5	Acute Lymphoblastic Leukemia			0.509	10902_53_ASPRV1_APRV1	Acute Lymphoblastic Leukemia
0.968	ARMC2	Acute Lymphoblastic Leukemia			0.503	10903_50_STX8_STX8	Acute Lymphoblastic Leukemia
0.912	ARMC5	Acute Lymphoblastic Leukemia			0.225	10907_116_NTM_NTRI	Acute Lymphoblastic Leukemia
0.983	ARPC5	Acute Lymphoblastic Leukemia			0.549	10908_2_GALNT13_GLT13	Acute Lymphoblastic Leukemia
0.368	ARPP19	Acute Lymphoblastic Leukemia			0.743	10916_44_PLA2R1_PLA2R	Acute Lymphoblastic Leukemia
0.674	ARRB1	Acute Lymphoblastic Leukemia			0.452	10924_258_CYB5D2_NEUFC	Acute Lymphoblastic Leukemia
0.607	ARSB	Acute Lymphoblastic Leukemia			0.508	10933_107_CALN1_CABP8	Acute Lymphoblastic Leukemia
0.523	ASL	Acute Lymphoblastic Leukemia			0.509	10939_16_PLEKHA4_PKHA4	Acute Lymphoblastic Leukemia
0.349	ASPDH	Acute Lymphoblastic Leukemia			0.199	10940_25_SRL_SRCA	Acute Lymphoblastic Leukemia
0.411	ATF3	Acute Lymphoblastic Leukemia			0.228	10948_14_PLD3_PLD3	Acute Lymphoblastic Leukemia
0.97	ATF5	Acute Lymphoblastic Leukemia			0.452	10953_14_CLEC2A_CLC2A	Acute Lymphoblastic Leukemia
0.041	ATG10	Acute Lymphoblastic Leukemia			0.692	10955_4_CLEC10A_CLC10	Acute Lymphoblastic Leukemia
0.383	ATG16L1	Acute Lymphoblastic Leukemia			0.438	10959_125_BET1L_BET1L	Acute Lymphoblastic Leukemia
0.294	ATG9A	Acute Lymphoblastic Leukemia			0.597	10974_20_SPINK7_ISK7	Acute Lymphoblastic Leukemia
0.713	ATOX1	Acute Lymphoblastic Leukemia			0.359	10977_55_UCMA_UCMA	Acute Lymphoblastic Leukemia
0.925	ATP5G1	Acute Lymphoblastic Leukemia			0.04	10990_21_LRRK2_LRRK2	Acute Lymphoblastic Leukemia
0.123	ATP6AP1L	Acute Lymphoblastic Leukemia			0.624	11098_1_PDXK_PDXK	Acute Lymphoblastic Leukemia
0.676	ATP7B	Acute Lymphoblastic Leukemia			0.745	11102_22_REG4_REG4	Acute Lymphoblastic Leukemia
0.812	ATP8B2	Acute Lymphoblastic Leukemia			0.774	11103_24_HSPB1_HSP_27	Acute Lymphoblastic Leukemia
0.585	ATPAF1	Acute Lymphoblastic Leukemia			0.817	11104_13_CHI3L1_YKL_40	Acute Lymphoblastic Leukemia
0.493	ATPIF1	Acute Lymphoblastic Leukemia			0.499	11109_56_SVEP1_SVEP1	Acute Lymphoblastic Leukemia
0.631	ATRAID	Acute Lymphoblastic Leukemia			0.586	11116_16_C11orf87_CK087	Acute Lymphoblastic Leukemia
0.299	AVPI1	Acute Lymphoblastic Leukemia			0.612	11117_2_SPATA20_SPT20	Acute Lymphoblastic Leukemia
0.846	B3GALTL	Acute Lymphoblastic Leukemia			0.281	11118_107_RAB17_RAB17	Acute Lymphoblastic Leukemia
0.38	BAG5	Acute Lymphoblastic Leukemia			0.496	11128_29_TMEM132C_T132C	Acute Lymphoblastic Leukemia
0.48	BAK1	Acute Lymphoblastic Leukemia			0.516	11129_66_BMP15_BMP15	Acute Lymphoblastic Leukemia
0.727	BAZ2B	Acute Lymphoblastic Leukemia			0.485	11137_43_CSF2RB_IL3RB	Acute Lymphoblastic Leukemia
0.197	BCAS1	Acute Lymphoblastic Leukemia			0.746	11140_56_COL1A1_CO1A1	Acute Lymphoblastic Leukemia
0.627	BCAT2	Acute Lymphoblastic Leukemia			0.962	11142_11_ANGPTL1_ANGL1	Acute Lymphoblastic Leukemia
0.897	BCCIP	Acute Lymphoblastic Leukemia			0.404	11143_32_OLFM3_NOE3	Acute Lymphoblastic Leukemia
0.881	BCKDK	Acute Lymphoblastic Leukemia			0.398	11145_72_KIAA1549L_K154L	Acute Lymphoblastic Leukemia
0.563	BCL10	Acute Lymphoblastic Leukemia			0.886	11149_3_TLR1_TLR1	Acute Lymphoblastic Leukemia
0.552	BCL2L13	Acute Lymphoblastic Leukemia			0.25	11152_46_KLK13_kallikrein_13	Acute Lymphoblastic Leukemia
0.407	BCO2	Acute Lymphoblastic Leukemia			0.335	11160_56_RNF122_RN122	Acute Lymphoblastic Leukemia
0.804	BECN1	Acute Lymphoblastic Leukemia			0.377	11167_6_MTMR1_MTMR1	Acute Lymphoblastic Leukemia
0.363	BEGAIN	Acute Lymphoblastic Leukemia			0.592	11168_3_MEGF10_MEG10	Acute Lymphoblastic Leukemia
0.574	BIK	Acute Lymphoblastic Leukemia			0.369	11173_29_MILR1_MILR1	Acute Lymphoblastic Leukemia
0.699	BMP1	Acute Lymphoblastic Leukemia			0.389	11174_8_THSD7A_THS7A	Acute Lymphoblastic Leukemia
0.553	BMP8A	Acute Lymphoblastic Leukemia			0.983	11177_16_KRT5_K2C5	Acute Lymphoblastic Leukemia
0.689	BMPR2	Acute Lymphoblastic Leukemia			0.519	11178_21_SVEP1_SVEP1	Acute Lymphoblastic Leukemia
0.564	BNIPL	Acute Lymphoblastic Leukemia			0.393	11180_17_SMARCC1_SMRC1	Acute Lymphoblastic Leukemia
0.521	BRWD1	Acute Lymphoblastic Leukemia			0.983	11187_11_CLEC12A_CL12A	Acute Lymphoblastic Leukemia
0.538	BST1	Acute Lymphoblastic Leukemia			0.736	11192_168_TINAGL1_TINAL	Acute Lymphoblastic Leukemia
0.986	BTBD1	Acute Lymphoblastic Leukemia			0.491	11207_3_MSR1_Macrophage_scavenger_receptor	Acute Lymphoblastic Leukemia
0.202	BTBD17	Acute Lymphoblastic Leukemia			0.898	11208_15_NAGPA_NAGPA	Acute Lymphoblastic Leukemia
0.673	BTG2	Acute Lymphoblastic Leukemia			0.689	11211_7_TBCE_TBCE	Acute Lymphoblastic Leukemia
0.917	BTN2A1	Acute Lymphoblastic Leukemia			0.443	11212_7_TXNDC5_TXND5	Acute Lymphoblastic Leukemia
0.916	BTN3A1	Acute Lymphoblastic Leukemia			0.477	11214_40_DNAJB9_DNJB9	Acute Lymphoblastic Leukemia
0.313	BTNL3	Acute Lymphoblastic Leukemia			0.48	11215_6_CDH15_CAD15	Acute Lymphoblastic Leukemia
0.493	BTNL8	Acute Lymphoblastic Leukemia			0.058	11218_84_TPMT_TPMT	Acute Lymphoblastic Leukemia
0.916	BYSL	Acute Lymphoblastic Leukemia			0.951	11219_95_FGFBP3_FGFP3	Acute Lymphoblastic Leukemia
0.562	C10orf116	Acute Lymphoblastic Leukemia			0.431	11223_1_TMEM154_TM154	Acute Lymphoblastic Leukemia
0.272	C11orf1	Acute Lymphoblastic Leukemia			0.152	11228_37_RIC3_RIC3	Acute Lymphoblastic Leukemia
0.78	C11orf80	Acute Lymphoblastic Leukemia			0.252	11237_49_PCOLCE_PCOC1	Acute Lymphoblastic Leukemia
0.04	C12orf43	Acute Lymphoblastic Leukemia			0.614	11239_49_TMPRSS6_TMPS6	Acute Lymphoblastic Leukemia
0.079	C12orf76	Acute Lymphoblastic Leukemia			0.965	11241_8_ASL_ARLY	Acute Lymphoblastic Leukemia
0.556	C14orf159	Acute Lymphoblastic Leukemia			0.438	11243_90_ADGRF1_GPR110	Acute Lymphoblastic Leukemia
0.976	C16orf93	Acute Lymphoblastic Leukemia			0.52	11248_43_UROS_HEM4	Acute Lymphoblastic Leukemia
0.937	C17orf99	Acute Lymphoblastic Leukemia			0.445	11254_13_PAPLN_PPN	Acute Lymphoblastic Leukemia
0.909	C19orf12	Acute Lymphoblastic Leukemia			0.839	11257_1_QDPR_DHPR	Acute Lymphoblastic Leukemia
0.798	C19orf35	Acute Lymphoblastic Leukemia			0.34	11260_47_SUN5_SPA4L	Acute Lymphoblastic Leukemia
0.789	C19orf54	Acute Lymphoblastic Leukemia			0.224	11262_39_TRABD_TRABD	Acute Lymphoblastic Leukemia
0.674	C19orf66	Acute Lymphoblastic Leukemia			0.379	11263_57_CASQ1_CASQ1	Acute Lymphoblastic Leukemia
0.944	C1orf109	Acute Lymphoblastic Leukemia			0.182	11266_8_SELPLG_SELPL	Acute Lymphoblastic Leukemia
0.721	C1orf131	Acute Lymphoblastic Leukemia			0.699	11273_176_GSTT2B_GSTT2	Acute Lymphoblastic Leukemia
0.644	C1orf145	Acute Lymphoblastic Leukemia			0.613	11277_23_ATF6_ATF6A	Acute Lymphoblastic Leukemia
0.932	C1QL3	Acute Lymphoblastic Leukemia			0.077	11278_4_COL11A2_COL11A2	Acute Lymphoblastic Leukemia
0.981	C1QTNF4	Acute Lymphoblastic Leukemia			0.981	11280_6_GAD1_DCE1	Acute Lymphoblastic Leukemia
0.697	C1R	Acute Lymphoblastic Leukemia			0.191	11281_6_GRB7_GRB7	Acute Lymphoblastic Leukemia
0.985	C20orf196	Acute Lymphoblastic Leukemia			0.382	11283_13_DCAF5_DCAF5	Acute Lymphoblastic Leukemia
0.932	C20orf197	Acute Lymphoblastic Leukemia			0.626	11288_26_NT5C2_5NTC	Acute Lymphoblastic Leukemia
0.853	C20orf27	Acute Lymphoblastic Leukemia			0.403	11292_13_SCARA3_SCAR3	Acute Lymphoblastic Leukemia
0.857	C22orf29	Acute Lymphoblastic Leukemia			0.149	11293_14_LRRN1_LRRN1	Acute Lymphoblastic Leukemia
0.927	C4BPA	Acute Lymphoblastic Leukemia			0.013	11302_237_TNR_TENR	Acute Lymphoblastic Leukemia
0.242	C4BPB	Acute Lymphoblastic Leukemia			0.666	11307_33_WWP1_WWP1	Acute Lymphoblastic Leukemia
0.97	C5orf22	Acute Lymphoblastic Leukemia			0.354	11308_8_CREB3L4_CR3L4	Acute Lymphoblastic Leukemia
0.812	C6orf163	Acute Lymphoblastic Leukemia			0.208	11313_100_PCBD1_PHS	Acute Lymphoblastic Leukemia
0.022	C6orf3	Acute Lymphoblastic Leukemia			0.571	11315_148_PPM1D_PPM1D	Acute Lymphoblastic Leukemia
0.822	C7orf25	Acute Lymphoblastic Leukemia			0.74	11320_29_CHFR_CHFR	Acute Lymphoblastic Leukemia
0.598	C7orf29	Acute Lymphoblastic Leukemia			0.188	11325_8_BTG2_BTG2	Acute Lymphoblastic Leukemia
0.985	C7orf34	Acute Lymphoblastic Leukemia			0.149	11327_56_CLK2_CLK2	Acute Lymphoblastic Leukemia
0.748	C7orf41	Acute Lymphoblastic Leukemia			0.776	11333_82_ARHGAP25_RHG25	Acute Lymphoblastic Leukemia
0.927	C7orf49	Acute Lymphoblastic Leukemia			0.831	11347_9_TALDO1_Transaldolase	Acute Lymphoblastic Leukemia
0.588	C7orf53	Acute Lymphoblastic Leukemia			0.793	11351_233_NHEJ1_NHEJ1	Acute Lymphoblastic Leukemia
0.907	C8orf46	Acute Lymphoblastic Leukemia			0.862	11358_15_GRB10_GRB10	Acute Lymphoblastic Leukemia
0.508	C9orf84	Acute Lymphoblastic Leukemia			0.511	11360_39_RRM1_RRM1	Acute Lymphoblastic Leukemia
0.482	C9orf91	Acute Lymphoblastic Leukemia			0.793	11369_23_ADH5_ADHX	Acute Lymphoblastic Leukemia
0.706	CA2	Acute Lymphoblastic Leukemia			0.13	11370_20_INPP5E_INP5E	Acute Lymphoblastic Leukemia
0.833	CACNA2D3	Acute Lymphoblastic Leukemia			0.439	11372_2_ZNF18_ZNF18	Acute Lymphoblastic Leukemia
0.288	CACUL1	Acute Lymphoblastic Leukemia			0.395	11377_19_ADH7_ADH7	Acute Lymphoblastic Leukemia
0.484	CAMK2D	Acute Lymphoblastic Leukemia			0.482	11380_84_RBM24_RBM24	Acute Lymphoblastic Leukemia
0.678	CANX	Acute Lymphoblastic Leukemia			0.763	11383_41_KRT7_Keratin_7	Acute Lymphoblastic Leukemia
0.727	CAPN10	Acute Lymphoblastic Leukemia			0.342	11387_3_ATF6B_ATF6B	Acute Lymphoblastic Leukemia
0.684	CAPN12	Acute Lymphoblastic Leukemia			0.397	11388_75_WFDC2_HE4	Acute Lymphoblastic Leukemia
0.755	CAPRIN2	Acute Lymphoblastic Leukemia			0.249	11390_24_CA8_Carbonic_Anhydrase_VIII	Acute Lymphoblastic Leukemia
0.601	CARD8	Acute Lymphoblastic Leukemia			0.598	11391_69_MVK_MVK	Acute Lymphoblastic Leukemia
0.978	CARM1	Acute Lymphoblastic Leukemia			0.402	11396_39_DNAI1_DNAI1	Acute Lymphoblastic Leukemia
0.25	CASP4	Acute Lymphoblastic Leukemia			0.615	11401_181_RNF146_RN146	Acute Lymphoblastic Leukemia
0.976	CASP6	Acute Lymphoblastic Leukemia			0.043	11416_23_FBXL4_FBXL4	Acute Lymphoblastic Leukemia
0.812	CASP7	Acute Lymphoblastic Leukemia			0.505	11424_4_FAH_FAAA	Acute Lymphoblastic Leukemia
0.982	CASP8	Acute Lymphoblastic Leukemia			0.614	11425_31_RUFY1_RUFY1	Acute Lymphoblastic Leukemia
0.772	CAST	Acute Lymphoblastic Leukemia			0.2	11429_80_HNRNPC_hnRNP_C1_C2	Acute Lymphoblastic Leukemia
0.867	CAV2	Acute Lymphoblastic Leukemia			0.218	11430_49_DTX1_DTX1	Acute Lymphoblastic Leukemia
0.94	CBLN3	Acute Lymphoblastic Leukemia			0.019	11431_235_RECQL_RECQ1	Acute Lymphoblastic Leukemia
0.384	CBWD1	Acute Lymphoblastic Leukemia			0.343	11439_88_RHPN2_RHPN2	Acute Lymphoblastic Leukemia
0.447	CCDC102A	Acute Lymphoblastic Leukemia			0.951	11440_58_SOCS3_SOCS_3	Acute Lymphoblastic Leukemia
0.364	CCDC114	Acute Lymphoblastic Leukemia			0.986	11441_11_PYGL_PYGL	Acute Lymphoblastic Leukemia
0.498	CCDC132	Acute Lymphoblastic Leukemia			0.821	11454_87_EIF3G_EIF3G	Acute Lymphoblastic Leukemia
0.478	CCDC136	Acute Lymphoblastic Leukemia			0.475	11456_2_MAGEB10_MAGBA	Acute Lymphoblastic Leukemia
0.643	CCDC144B	Acute Lymphoblastic Leukemia			0.348	11457_53_GALE_GALE	Acute Lymphoblastic Leukemia
0.928	CCDC152	Acute Lymphoblastic Leukemia			0.162	11459_81_ELL_ELL	Acute Lymphoblastic Leukemia
0.612	CCDC174	Acute Lymphoblastic Leukemia			0.037	11464_9_RELB_RELB	Acute Lymphoblastic Leukemia
0.646	CCDC176	Acute Lymphoblastic Leukemia			0.223	11465_4_GPR135_GP135	Acute Lymphoblastic Leukemia
0.478	CCDC24	Acute Lymphoblastic Leukemia			0.875	11468_15_RBM19_RBM19	Acute Lymphoblastic Leukemia
0.998	CCDC57	Acute Lymphoblastic Leukemia			0.21	11510_31_APOL1_Apo_L1	Acute Lymphoblastic Leukemia
0.67	CCDC92	Acute Lymphoblastic Leukemia			0.466	11514_196_CD59_CD59	Acute Lymphoblastic Leukemia
0.4	CCHCR1	Acute Lymphoblastic Leukemia			0.983	11530_37_HMBS_HEM3	Acute Lymphoblastic Leukemia
0.891	CCL3L3	Acute Lymphoblastic Leukemia			0.58	11534_6_LRIT3_LRIT3	Acute Lymphoblastic Leukemia
0.604	CCL4L1	Acute Lymphoblastic Leukemia			0.569	11537_12_TFR2_TFR2	Acute Lymphoblastic Leukemia
0.465	CCL5	Acute Lymphoblastic Leukemia			0.782	11540_37_FOXO3_FOXO3A	Acute Lymphoblastic Leukemia
0.987	CCR5	Acute Lymphoblastic Leukemia			0.364	11543_84_LIMA1_LIMA1	Acute Lymphoblastic Leukemia
0.917	CCT5	Acute Lymphoblastic Leukemia			0.767	11547_84_MUSK_MUSK	Acute Lymphoblastic Leukemia
0.881	CCT6A	Acute Lymphoblastic Leukemia			0.425	11556_19_ARFGAP1_ARFG1	Acute Lymphoblastic Leukemia
0.429	CCT6P1	Acute Lymphoblastic Leukemia			0.188	11563_51_SYTL4_SYTL4	Acute Lymphoblastic Leukemia
0.511	CD164	Acute Lymphoblastic Leukemia			0.882	11568_2_FKBP1B_FKB1B	Acute Lymphoblastic Leukemia
0.786	CD1A	Acute Lymphoblastic Leukemia			0.237	11570_94_BCAP29_BAP29	Acute Lymphoblastic Leukemia
0.687	CD1E	Acute Lymphoblastic Leukemia			0.373	11571_75_KLRC3_NKG2E	Acute Lymphoblastic Leukemia
0.955	CD22	Acute Lymphoblastic Leukemia			0.259	11587_5_MGA_MGAP	Acute Lymphoblastic Leukemia
0.219	CD226	Acute Lymphoblastic Leukemia			0.367	11592_1_ELAVL1_ELAV1	Acute Lymphoblastic Leukemia
0.902	CD247	Acute Lymphoblastic Leukemia			0.877	11601_26_DHX8_DHX8	Acute Lymphoblastic Leukemia
0.408	CD27-AS1	Acute Lymphoblastic Leukemia			0.534	11608_5_MAP1LC3B_MLP3B	Acute Lymphoblastic Leukemia
0.568	CD300C	Acute Lymphoblastic Leukemia			0.212	11633_89_AHSA1_AHSA1	Acute Lymphoblastic Leukemia
0.586	CD300LB	Acute Lymphoblastic Leukemia			0.792	11638_42_B3GALT2_B3GT2	Acute Lymphoblastic Leukemia
0.811	CD300LD	Acute Lymphoblastic Leukemia			0.356	11643_73_DTX3L_DTX3L	Acute Lymphoblastic Leukemia
0.545	CD300LF	Acute Lymphoblastic Leukemia			0.398	11646_4_CHST9_Carbohydrate_sulfotransferase_9	Acute Lymphoblastic Leukemia
0.972	CD44	Acute Lymphoblastic Leukemia			0.256	11647_6_FZD10_Frizzled_10	Acute Lymphoblastic Leukemia
0.356	CD47	Acute Lymphoblastic Leukemia			0.6	11649_3_SMAP1_SMAP1	Acute Lymphoblastic Leukemia
0.6	CD55	Acute Lymphoblastic Leukemia			0.377	11656_110_EVL_EVL	Acute Lymphoblastic Leukemia
0.478	CD6	Acute Lymphoblastic Leukemia			0.257	11659_31_CLINT1_EPN4	Acute Lymphoblastic Leukemia
0.52	CD69	Acute Lymphoblastic Leukemia			0.488	11666_72_RGS8_RGS8	Acute Lymphoblastic Leukemia
0.822	CD86	Acute Lymphoblastic Leukemia			0.452	11672_17_KIF16B_KI16B	Acute Lymphoblastic Leukemia
0.512	CD93	Acute Lymphoblastic Leukemia			0.087	11678_105_GJD2_CXD2	Acute Lymphoblastic Leukemia
0.365	CDADC1	Acute Lymphoblastic Leukemia			0.539	11681_8_AGFG1_NUPL	Acute Lymphoblastic Leukemia
0.427	CDC25B	Acute Lymphoblastic Leukemia			0.354	11682_7_TXNIP_TXNIP	Acute Lymphoblastic Leukemia
0.919	CDC42	Acute Lymphoblastic Leukemia			0.612	11692_21_SHC4_SHC4	Acute Lymphoblastic Leukemia
0.775	CDC42EP1	Acute Lymphoblastic Leukemia			0.558	11696_7_CRABP2_RABP2	Acute Lymphoblastic Leukemia
0.937	CDC42SE1	Acute Lymphoblastic Leukemia			0.202	11709_29_CPT1B_CPT1B	Acute Lymphoblastic Leukemia
0.309	CDHR1	Acute Lymphoblastic Leukemia			0.113	11872_9_PCDHGB1_PCDGD	Acute Lymphoblastic Leukemia
0.838	CDHR3	Acute Lymphoblastic Leukemia			0.652	11910_27_DLX4_DLX4	Acute Lymphoblastic Leukemia
0.931	CDK10	Acute Lymphoblastic Leukemia			0.201	11926_23_AAGAB_P34	Acute Lymphoblastic Leukemia
0.326	CDK13	Acute Lymphoblastic Leukemia			0.45	11952_1_IGDCC3_IGDC3	Acute Lymphoblastic Leukemia
0.926	CDK19	Acute Lymphoblastic Leukemia			0.594	11955_1_ARHGAP1_RHG01	Acute Lymphoblastic Leukemia
0.546	CDKN1A	Acute Lymphoblastic Leukemia			0.336	11967_23_CRABP1_RABP1	Acute Lymphoblastic Leukemia
0.171	CEACAM19	Acute Lymphoblastic Leukemia			0.558	11989_35_EMC1_EMC1	Acute Lymphoblastic Leukemia
0.763	CEBPZ	Acute Lymphoblastic Leukemia			0.46	12001_7_TJP1_ZO1	Acute Lymphoblastic Leukemia
0.78	CECR1	Acute Lymphoblastic Leukemia			0.99	12008_3_CD7_CD7	Acute Lymphoblastic Leukemia
0.542	CELSR2	Acute Lymphoblastic Leukemia			0.356	12014_19_PTS_PTPS	Acute Lymphoblastic Leukemia
0.799	CENPB	Acute Lymphoblastic Leukemia			0.597	12022_12_SMAD4_SMAD4	Acute Lymphoblastic Leukemia
0.152	CENPN	Acute Lymphoblastic Leukemia			0.285	12030_82_DES_Desmin	Acute Lymphoblastic Leukemia
0.983	CENPV	Acute Lymphoblastic Leukemia			0.261	12033_3_BUB1_BUB1	Acute Lymphoblastic Leukemia
0.875	CEP170B	Acute Lymphoblastic Leukemia			0.023	12041_33_HSPA1L_HS71L	Acute Lymphoblastic Leukemia
0.969	CEP97	Acute Lymphoblastic Leukemia			0.421	12046_51_TARDBP_TADBP	Acute Lymphoblastic Leukemia
0.266	CERK	Acute Lymphoblastic Leukemia			0.275	12329_21_RPS6KA1_KS6A1	Acute Lymphoblastic Leukemia
0.706	CERS2	Acute Lymphoblastic Leukemia			0.512	12332_7_EEF2K_EF2K	Acute Lymphoblastic Leukemia
0.52	CFD	Acute Lymphoblastic Leukemia			0.65	12333_87_RPIA_RPIA	Acute Lymphoblastic Leukemia
0.876	CHAF1A	Acute Lymphoblastic Leukemia			0.686	12334_25_SHMT1_cSHMT	Acute Lymphoblastic Leukemia
0.99	CHD1L	Acute Lymphoblastic Leukemia			0.668	12338_27_EGFLAM_EGFLA	Acute Lymphoblastic Leukemia
0.95	CHI3L2	Acute Lymphoblastic Leukemia			0.708	12341_8_DUSP6_DUS6	Acute Lymphoblastic Leukemia
0.432	CHRM3-AS2	Acute Lymphoblastic Leukemia			0.289	12347_29_CCM2_CCM2	Acute Lymphoblastic Leukemia
0.708	CHSY1	Acute Lymphoblastic Leukemia			0.609	12350_86_ETS2_ETS2	Acute Lymphoblastic Leukemia
0.78	CIB2	Acute Lymphoblastic Leukemia			0.947	12366_16_CRYGD_CRGD	Acute Lymphoblastic Leukemia
0.287	CIR1	Acute Lymphoblastic Leukemia			0.558	12370_30_APOF_Apo_F	Acute Lymphoblastic Leukemia
0.831	CKM	Acute Lymphoblastic Leukemia			0.287	12376_85_CDKN2D_p19_INK4d	Acute Lymphoblastic Leukemia
0.99	CLDN5	Acute Lymphoblastic Leukemia			0.934	12378_71_TAPBP_TPSN	Acute Lymphoblastic Leukemia
0.596	CLIC3	Acute Lymphoblastic Leukemia			0.298	12384_92_COPS7B_CSN7B	Acute Lymphoblastic Leukemia
0.853	CLIC4	Acute Lymphoblastic Leukemia			0.365	12386_11_RNPEP_AMPB	Acute Lymphoblastic Leukemia
0.851	CLIP2	Acute Lymphoblastic Leukemia			0.434	12391_27_PDZD7_PDZD7	Acute Lymphoblastic Leukemia
0.387	CLMN	Acute Lymphoblastic Leukemia			0.504	12392_30_ARL1_ARL1	Acute Lymphoblastic Leukemia
0.714	CLN6	Acute Lymphoblastic Leukemia			0.121	12399_194_CCDC50_CCD50	Acute Lymphoblastic Leukemia
0.97	CMAHP	Acute Lymphoblastic Leukemia			0.568	12401_3_STAMBPL1_STALP	Acute Lymphoblastic Leukemia
0.1	CMC2	Acute Lymphoblastic Leukemia			0.344	12415_122_EDF1_EDF1	Acute Lymphoblastic Leukemia
0.816	CMPK1	Acute Lymphoblastic Leukemia			0.399	12417_46_TPRKB_TPRKB	Acute Lymphoblastic Leukemia
0.738	CMTM3	Acute Lymphoblastic Leukemia			0.131	12420_10_GPD1L_GPD1L	Acute Lymphoblastic Leukemia
0.513	CMTM7	Acute Lymphoblastic Leukemia			0.652	12423_38_A1CF_A1CF	Acute Lymphoblastic Leukemia
0.979	CNR1	Acute Lymphoblastic Leukemia			0.092	12425_104_ARF6_ARF6	Acute Lymphoblastic Leukemia
0.657	CNTROB	Acute Lymphoblastic Leukemia			0.293	12427_8_CDC25B_MPIP2	Acute Lymphoblastic Leukemia
0.86	COL5A3	Acute Lymphoblastic Leukemia			0.526	12432_23_CACYBP_CYBP	Acute Lymphoblastic Leukemia
0.876	COL6A1	Acute Lymphoblastic Leukemia			0.454	12433_8_ARL11_ARL11	Acute Lymphoblastic Leukemia
0.609	COL6A4P2	Acute Lymphoblastic Leukemia			0.531	12436_84_GSTO1_GST_omega_1	Acute Lymphoblastic Leukemia
0.958	COL9A2	Acute Lymphoblastic Leukemia			0.519	12437_18_ULK3_ULK3	Acute Lymphoblastic Leukemia
0.909	COMMD5	Acute Lymphoblastic Leukemia			0.175	12445_50_ANKRD27_ANR27	Acute Lymphoblastic Leukemia
0.955	COQ6	Acute Lymphoblastic Leukemia			0.498	12449_16_PPIH_PPIH	Acute Lymphoblastic Leukemia
0.999	COX11	Acute Lymphoblastic Leukemia			0.316	12450_42_PMVK_PMVK	Acute Lymphoblastic Leukemia
0.697	COX15	Acute Lymphoblastic Leukemia			0.264	12451_62_BACH1_BACH1	Acute Lymphoblastic Leukemia
0.871	COX5BP6	Acute Lymphoblastic Leukemia			0.184	12455_48_MYNN_MYNN	Acute Lymphoblastic Leukemia
0.32	COX6B1	Acute Lymphoblastic Leukemia			0.408	12456_5_PFKFB3_F263	Acute Lymphoblastic Leukemia
0.424	CPA3	Acute Lymphoblastic Leukemia			0.45	12460_18_PSMA7_PSA7	Acute Lymphoblastic Leukemia
0.924	CPNE3	Acute Lymphoblastic Leukemia			0.07	12461_8_SIRT5_SIRT5	Acute Lymphoblastic Leukemia
0.879	CPNE5	Acute Lymphoblastic Leukemia			0.248	12463_7_KLHL13_KLH13	Acute Lymphoblastic Leukemia
0.73	CPSF2	Acute Lymphoblastic Leukemia			0.689	12469_19_MAPRE1_MARE1	Acute Lymphoblastic Leukemia
0.594	CPT2	Acute Lymphoblastic Leukemia			0.371	12471_47_STAU1_STAU1	Acute Lymphoblastic Leukemia
0.847	CPVL	Acute Lymphoblastic Leukemia			0.414	12473_48_KCTD5_KCTD5	Acute Lymphoblastic Leukemia
0.303	CREG1	Acute Lymphoblastic Leukemia			0.735	12475_48_CLIC5_CLIC5	Acute Lymphoblastic Leukemia
0.501	CRHR1-IT1	Acute Lymphoblastic Leukemia			0.554	12479_50_PRKAR1B_KAP1	Acute Lymphoblastic Leukemia
0.999	CRIP1P1	Acute Lymphoblastic Leukemia			0.607	12480_9_OTUD5_OTUD5	Acute Lymphoblastic Leukemia
0.916	CSNK1D	Acute Lymphoblastic Leukemia			0.502	12482_5_BPTF_BPTF	Acute Lymphoblastic Leukemia
0.614	CSRNP2	Acute Lymphoblastic Leukemia			0.583	12484_67_PITPNB_PIPNB	Acute Lymphoblastic Leukemia
0.739	CSTA	Acute Lymphoblastic Leukemia			0.765	12486_8_GLRX2_GLRX2	Acute Lymphoblastic Leukemia
0.296	CTA-126B4.7	Acute Lymphoblastic Leukemia			0.338	12488_9_MCTS1_MCTS1	Acute Lymphoblastic Leukemia
0.539	CTA-250D10.23	Acute Lymphoblastic Leukemia			0.887	12490_92_LAMTOR3_LTOR3	Acute Lymphoblastic Leukemia
0.195	CTA-29F11.1	Acute Lymphoblastic Leukemia			0.595	12494_99_GABARAPL2_GBRL2	Acute Lymphoblastic Leukemia
0.561	CTB-114C7.4	Acute Lymphoblastic Leukemia			0.785	12498_12_TAX1BP3_TX1B3	Acute Lymphoblastic Leukemia
0.759	CTB-55O6.12	Acute Lymphoblastic Leukemia			0.771	12500_88_UBA2_SAE2	Acute Lymphoblastic Leukemia
0.707	CTBP1-AS1	Acute Lymphoblastic Leukemia			0.047	12501_10_TBCA_TBCA	Acute Lymphoblastic Leukemia
0.491	CTC-429P9.3	Acute Lymphoblastic Leukemia			0.223	12503_5_GPR68_SPR1	Acute Lymphoblastic Leukemia
0.675	CTC-459F4.3	Acute Lymphoblastic Leukemia			0.52	12504_26_LMOD1_LMOD1	Acute Lymphoblastic Leukemia
0.987	CTC-462L7.1	Acute Lymphoblastic Leukemia			0.108	12509_115_COMMD1_COMD1	Acute Lymphoblastic Leukemia
0.903	CTC-484P3.1	Acute Lymphoblastic Leukemia			0.612	12510_3_STAP1_STAP1	Acute Lymphoblastic Leukemia
0.932	CTC-490E21.10	Acute Lymphoblastic Leukemia			0.72	12511_83_SLC41A2_S41A2	Acute Lymphoblastic Leukemia
0.521	CTC-490G23.2	Acute Lymphoblastic Leukemia			0.13	12514_16_METTL1_METTL1	Acute Lymphoblastic Leukemia
0.926	CTC-523E23.1	Acute Lymphoblastic Leukemia			0.41	12517_52_PDCD5_TFAR19	Acute Lymphoblastic Leukemia
0.226	CTC-550B14.6	Acute Lymphoblastic Leukemia			0.371	12521_3_CDKN2C_CDN2C	Acute Lymphoblastic Leukemia
0.142	CTC-550B14.7	Acute Lymphoblastic Leukemia			0.573	12524_18_SAT2_SAT2	Acute Lymphoblastic Leukemia
0.514	CTC-774J1.2	Acute Lymphoblastic Leukemia			0.325	12527_50_THRA_THA	Acute Lymphoblastic Leukemia
0.439	CTD-2006K23.1	Acute Lymphoblastic Leukemia			0.395	12529_32_FKBP6_FKBP6	Acute Lymphoblastic Leukemia
0.577	CTD-2010I16.1	Acute Lymphoblastic Leukemia			0.331	12533_135_CYTH2_CYH2	Acute Lymphoblastic Leukemia
0.851	CTD-2017D11.1	Acute Lymphoblastic Leukemia			0.654	12537_88_PURA_PURA	Acute Lymphoblastic Leukemia
0.732	CTD-2054N24.2	Acute Lymphoblastic Leukemia			0.711	12546_1_SMTN_SMTN	Acute Lymphoblastic Leukemia
0.089	CTD-2085J24.4	Acute Lymphoblastic Leukemia			0.537	12549_33_HPGDS_PTGD2	Acute Lymphoblastic Leukemia
0.061	CTD-2240H23.2	Acute Lymphoblastic Leukemia			0.399	12551_3_ITCH_ITCH	Acute Lymphoblastic Leukemia
0.617	CTD-2292M16.8	Acute Lymphoblastic Leukemia			0.573	12558_3_UBASH3B_UBS3B	Acute Lymphoblastic Leukemia
0.5	CTD-2368P22.1	Acute Lymphoblastic Leukemia			0.438	12562_1_PKN1_PKN1	Acute Lymphoblastic Leukemia
0.672	CTD-2510F5.4	Acute Lymphoblastic Leukemia			0.351	12572_236_EFS_EFS	Acute Lymphoblastic Leukemia
0.853	CTD-2516F10.2	Acute Lymphoblastic Leukemia			0.759	12575_30_MTHFD1_C1TC	Acute Lymphoblastic Leukemia
0.903	CTD-2517M22.14	Acute Lymphoblastic Leukemia			0.794	12576_21_MAGEA3_MAGE_3	Acute Lymphoblastic Leukemia
0.681	CTD-2540F13.2	Acute Lymphoblastic Leukemia			0.374	12585_39_ERCC1_ERCC1	Acute Lymphoblastic Leukemia
0.862	CTD-2561B21.11	Acute Lymphoblastic Leukemia			0.009	12587_65_ARL2_ARL2	Acute Lymphoblastic Leukemia
0.883	CTD-2587H19.1	Acute Lymphoblastic Leukemia			0.499	12593_33_PDRG1_PDRG1	Acute Lymphoblastic Leukemia
0.792	CTD-2623N2.3	Acute Lymphoblastic Leukemia			0.508	12594_5_GCA_GRAN	Acute Lymphoblastic Leukemia
0.782	CTD-3099C6.11	Acute Lymphoblastic Leukemia			0.704	12603_87_PABPC4_PABP4	Acute Lymphoblastic Leukemia
0.292	CTD-3099C6.9	Acute Lymphoblastic Leukemia			0.699	12604_16_SCMH1_SCMH1	Acute Lymphoblastic Leukemia
0.533	CTD-3131K8.2	Acute Lymphoblastic Leukemia			0.537	12612_37_PSMB1_PSB1	Acute Lymphoblastic Leukemia
0.514	CTD-3138B18.5	Acute Lymphoblastic Leukemia			0.352	12616_45_NRBP1_NRBP	Acute Lymphoblastic Leukemia
0.288	CTD-3162L10.1	Acute Lymphoblastic Leukemia			0.665	12621_55_PPP2R1A_PP2AAA	Acute Lymphoblastic Leukemia
0.582	CTGLF12P	Acute Lymphoblastic Leukemia			0.526	12623_84_JARID2_JARD2	Acute Lymphoblastic Leukemia
0.531	CTNNA2	Acute Lymphoblastic Leukemia			0.944	12630_8_ARFIP2_ARFP2	Acute Lymphoblastic Leukemia
0.162	CTNNAL1	Acute Lymphoblastic Leukemia			0.64	12632_14_NAT1_ARY1	Acute Lymphoblastic Leukemia
0.818	CTSC	Acute Lymphoblastic Leukemia			0.658	12634_79_BCAR3_BCAR3	Acute Lymphoblastic Leukemia
0.941	CTSD	Acute Lymphoblastic Leukemia			0.925	12635_9_TRDMT1_TRDMT	Acute Lymphoblastic Leukemia
0.774	CTSF	Acute Lymphoblastic Leukemia			0.733	12641_3_INPP5B_I5P2	Acute Lymphoblastic Leukemia
0.221	CTSS	Acute Lymphoblastic Leukemia			0.524	12650_43_GNAI3_GNAI3	Acute Lymphoblastic Leukemia
0.685	CUTA	Acute Lymphoblastic Leukemia			0.691	12656_1_KLC1_KLC1	Acute Lymphoblastic Leukemia
0.482	CWC15	Acute Lymphoblastic Leukemia			0.34	12658_72_PANK3_PANK3	Acute Lymphoblastic Leukemia
0.735	CYB5D1	Acute Lymphoblastic Leukemia			0.704	12663_1_TST_THTR	Acute Lymphoblastic Leukemia
0.688	CYLD	Acute Lymphoblastic Leukemia			0.274	12667_2_GDA_GUAD	Acute Lymphoblastic Leukemia
0.338	CYP26B1	Acute Lymphoblastic Leukemia			0.444	12668_7_VPS4B_VPS4B	Acute Lymphoblastic Leukemia
0.655	CYP2D6	Acute Lymphoblastic Leukemia			0.538	12671_35_SULT1B1_ST1B1	Acute Lymphoblastic Leukemia
0.957	CYP2T2P	Acute Lymphoblastic Leukemia			0.603	12676_1_PACSIN1_PACN1	Acute Lymphoblastic Leukemia
0.385	CYP4F22	Acute Lymphoblastic Leukemia			0.533	12681_63_USP21_UBP21	Acute Lymphoblastic Leukemia
0.358	DAAM1	Acute Lymphoblastic Leukemia			0.598	12684_5_SCIN_ADSV	Acute Lymphoblastic Leukemia
0.443	DAB2	Acute Lymphoblastic Leukemia			0.637	12685_57_HOMER2_HOME2	Acute Lymphoblastic Leukemia
0.597	DARC	Acute Lymphoblastic Leukemia			0.603	12688_115_RPS6KA6_KS6A6	Acute Lymphoblastic Leukemia
0.805	DAXX	Acute Lymphoblastic Leukemia			0.352	12693_2_SH3BGRL_SH3L1	Acute Lymphoblastic Leukemia
0.553	DCAF16	Acute Lymphoblastic Leukemia			0.22	12704_26_SH2D3C_SH2D3	Acute Lymphoblastic Leukemia
0.912	DCHS1	Acute Lymphoblastic Leukemia			0.262	12706_2_CDC42BPA_MRCKA	Acute Lymphoblastic Leukemia
0.563	DCP2	Acute Lymphoblastic Leukemia			0.129	12713_365_RGS19_RGS19	Acute Lymphoblastic Leukemia
0.866	DCXR	Acute Lymphoblastic Leukemia			0.944	12714_38_AP1G2_AP1G2	Acute Lymphoblastic Leukemia
0.363	DDA1	Acute Lymphoblastic Leukemia			0.479	12715_30_DCP1B_DCP1B	Acute Lymphoblastic Leukemia
0.8	DDAH1	Acute Lymphoblastic Leukemia			0.437	12716_3_ZNF175_ZN175	Acute Lymphoblastic Leukemia
0.263	DDX11	Acute Lymphoblastic Leukemia			0.454	12720_71_UBQLN4_UBQL4	Acute Lymphoblastic Leukemia
0.486	DDX39B	Acute Lymphoblastic Leukemia			0.618	12724_81_CIRBP_CIRBP	Acute Lymphoblastic Leukemia
0.347	DDX51	Acute Lymphoblastic Leukemia			0.379	12727_7_PTGFRN_FPRP	Acute Lymphoblastic Leukemia
0.021	DDX59	Acute Lymphoblastic Leukemia			0.134	12730_3_NDC80_KNTC2	Acute Lymphoblastic Leukemia
0.994	DDX60L	Acute Lymphoblastic Leukemia			0.29	12731_12_PLEKHA7_PKHA7	Acute Lymphoblastic Leukemia
0.77	DEAF1	Acute Lymphoblastic Leukemia			0.618	12740_55_FEV_FEV	Acute Lymphoblastic Leukemia
0.087	DENND1A	Acute Lymphoblastic Leukemia			0.765	12747_89_RBM3_RBM3	Acute Lymphoblastic Leukemia
0.994	DEPDC5	Acute Lymphoblastic Leukemia			0.27	12750_9_ITGB2_LFA_1_beta_2	Acute Lymphoblastic Leukemia
0.875	DERL1	Acute Lymphoblastic Leukemia			0.246	12754_14_CSDC2_CSDC2	Acute Lymphoblastic Leukemia
0.945	DEXI	Acute Lymphoblastic Leukemia			0.546	12756_3_BACH2_BACH2	Acute Lymphoblastic Leukemia
0.694	DFNB31	Acute Lymphoblastic Leukemia			0.716	12758_47_GRID2_GRID2	Acute Lymphoblastic Leukemia
0.782	DGAT1	Acute Lymphoblastic Leukemia			0.267	12760_34_ZNF774_ZN774	Acute Lymphoblastic Leukemia
0.885	DGCR6L	Acute Lymphoblastic Leukemia			0.097	12764_3_ELMO1_ELMO1	Acute Lymphoblastic Leukemia
0.102	DHRS4-AS1	Acute Lymphoblastic Leukemia			0.742	12786_61_GPCPD1_GDE5	Acute Lymphoblastic Leukemia
0.717	DHX32	Acute Lymphoblastic Leukemia			0.436	12800_5_TPPP2_TPPP2	Acute Lymphoblastic Leukemia
0.879	DHX36	Acute Lymphoblastic Leukemia			0.449	12812_25_ACYP2_ACYP2	Acute Lymphoblastic Leukemia
0.084	DICER1	Acute Lymphoblastic Leukemia			0.505	12814_17_RNPC3_RBM40	Acute Lymphoblastic Leukemia
0.836	DIXDC1	Acute Lymphoblastic Leukemia			0.265	12817_1_GEM_GEM	Acute Lymphoblastic Leukemia
0.877	DKK3	Acute Lymphoblastic Leukemia			0.402	12818_159_SLC14A2_UT2	Acute Lymphoblastic Leukemia
0.323	DNAH7	Acute Lymphoblastic Leukemia			0.163	12820_1_GRAP_GRAP	Acute Lymphoblastic Leukemia
0.788	DNAI2	Acute Lymphoblastic Leukemia			0.374	12827_37_RGS3_RGS3	Acute Lymphoblastic Leukemia
0.732	DNAJC1	Acute Lymphoblastic Leukemia			0.688	12831_21_TESC_TESC	Acute Lymphoblastic Leukemia
0.437	DNAJC15	Acute Lymphoblastic Leukemia			0.505	12845_18_SNX17_SNX17	Acute Lymphoblastic Leukemia
0.855	DNAJC18	Acute Lymphoblastic Leukemia			0.405	12855_16_CASS4_CT032	Acute Lymphoblastic Leukemia
0.715	DNAJC27-AS1	Acute Lymphoblastic Leukemia			0.782	12859_33_ECI2_PECI	Acute Lymphoblastic Leukemia
0.101	DNAJC27	Acute Lymphoblastic Leukemia			0.243	12864_9_NIPAL4_NIPA4	Acute Lymphoblastic Leukemia
0.794	DNASE2	Acute Lymphoblastic Leukemia			0.467	12869_68_DDX6_DDX6	Acute Lymphoblastic Leukemia
0.85	DND1P1	Acute Lymphoblastic Leukemia			0.215	12881_17_RDH16_RDH16	Acute Lymphoblastic Leukemia
0.825	DNHD1	Acute Lymphoblastic Leukemia			0.323	12891_1_MICALL2_MILK2	Acute Lymphoblastic Leukemia
0.887	DNTT	Acute Lymphoblastic Leukemia			0.336	12892_10_SYTL1_SYTL1	Acute Lymphoblastic Leukemia
0.898	DNTTIP2	Acute Lymphoblastic Leukemia			0.552	12894_3_PAXIP1_PAXI1	Acute Lymphoblastic Leukemia
0.056	DOCK5	Acute Lymphoblastic Leukemia			0.993	12895_28_DGKB_DGKB	Acute Lymphoblastic Leukemia
0.941	DOCK8	Acute Lymphoblastic Leukemia			0.328	12923_51_KRT17_Keratin_17	Acute Lymphoblastic Leukemia
0.966	DOK2	Acute Lymphoblastic Leukemia			0.426	12925_105_AXIN2_AXIN2	Acute Lymphoblastic Leukemia
0.87	DOK6	Acute Lymphoblastic Leukemia			0.565	12933_17_ENOX1_ENOX1	Acute Lymphoblastic Leukemia
0.752	DPEP2	Acute Lymphoblastic Leukemia			0.461	12934_1_HERC5_HERC5	Acute Lymphoblastic Leukemia
0.377	DPF2	Acute Lymphoblastic Leukemia			0.218	12939_1_POLR1C_RPAC1	Acute Lymphoblastic Leukemia
0.465	DPY19L2	Acute Lymphoblastic Leukemia			0.361	12945_33_RAB18_RAB18	Acute Lymphoblastic Leukemia
0.161	DSC2	Acute Lymphoblastic Leukemia			0.273	12960_9_GCK_HXK4	Acute Lymphoblastic Leukemia
0.251	DSE	Acute Lymphoblastic Leukemia			0.652	12968_2_CSRP2_CSRP2	Acute Lymphoblastic Leukemia
0.984	DSEL	Acute Lymphoblastic Leukemia			0.498	12970_35_STAU2_STAU2	Acute Lymphoblastic Leukemia
0.262	DTD1	Acute Lymphoblastic Leukemia			0.309	12975_11_KRT20_Keratin_20	Acute Lymphoblastic Leukemia
0.596	DTWD2	Acute Lymphoblastic Leukemia			0.395	12986_12_LIN7C_LIN7C	Acute Lymphoblastic Leukemia
0.426	DTX3L	Acute Lymphoblastic Leukemia			0.521	12991_49_CUL9_CUL9	Acute Lymphoblastic Leukemia
0.797	DUSP23	Acute Lymphoblastic Leukemia			0.488	13007_66_LCN10_LCN10	Acute Lymphoblastic Leukemia
0.395	DVL2	Acute Lymphoblastic Leukemia			0.209	13011_20_RPS10_RS10	Acute Lymphoblastic Leukemia
0.837	DYNLT1	Acute Lymphoblastic Leukemia			0.088	13022_20_TP53I11_P5I11	Acute Lymphoblastic Leukemia
0.56	EEF1A1	Acute Lymphoblastic Leukemia			0.22	13025_4_FRS2_FRS2	Acute Lymphoblastic Leukemia
0.423	EFCAB2	Acute Lymphoblastic Leukemia			0.304	13032_1_BECN1_BECN1	Acute Lymphoblastic Leukemia
0.986	EFEMP2	Acute Lymphoblastic Leukemia			0.486	13039_1_PPP1R8_PP1R8	Acute Lymphoblastic Leukemia
0.488	EFTUD2	Acute Lymphoblastic Leukemia			0.195	13042_7_KCNA10_KCA10	Acute Lymphoblastic Leukemia
0.783	EGLN2	Acute Lymphoblastic Leukemia			0.646	13044_5_TSG101_TS101	Acute Lymphoblastic Leukemia
0.958	EHHADH	Acute Lymphoblastic Leukemia			0.387	13053_6_SLC6A14_S6A14	Acute Lymphoblastic Leukemia
0.888	EHMT1	Acute Lymphoblastic Leukemia			0.498	13055_53_PSD_PSD1	Acute Lymphoblastic Leukemia
0.563	EIF2D	Acute Lymphoblastic Leukemia			0.414	13059_33_RFK_RIFK	Acute Lymphoblastic Leukemia
0.631	EIF3F	Acute Lymphoblastic Leukemia			0.008	13066_42_EDC4_EDC4	Acute Lymphoblastic Leukemia
0.877	EIF3G	Acute Lymphoblastic Leukemia			0.515	13068_139_CCS_CCS	Acute Lymphoblastic Leukemia
0.795	EIF4B	Acute Lymphoblastic Leukemia			0.639	13076_4_FXR1_FXR1	Acute Lymphoblastic Leukemia
0.587	ELF2	Acute Lymphoblastic Leukemia			0.367	13082_9_UNC45A_UN45A	Acute Lymphoblastic Leukemia
0.225	ELL	Acute Lymphoblastic Leukemia			0.289	13090_17_S100A6_S100A6	Acute Lymphoblastic Leukemia
0.689	ELMO2	Acute Lymphoblastic Leukemia			0.682	13093_6_SECTM1_SECTM1	Acute Lymphoblastic Leukemia
0.419	ELP5	Acute Lymphoblastic Leukemia			0.865	13094_75_RSPO3_RSPO3	Acute Lymphoblastic Leukemia
0.988	ENDOU	Acute Lymphoblastic Leukemia			0.315	13095_51_REG1A_PSP	Acute Lymphoblastic Leukemia
0.511	ENKUR	Acute Lymphoblastic Leukemia			0.321	13097_11_BCL2L2_Apoptosis_regulator_Bcl_W	Acute Lymphoblastic Leukemia
0.664	ENO1	Acute Lymphoblastic Leukemia			0.209	13101_60_SOST_SOST	Acute Lymphoblastic Leukemia
0.407	ENOSF1	Acute Lymphoblastic Leukemia			0.199	13102_1_FAM3D_FAM3D	Acute Lymphoblastic Leukemia
0.424	ERCC3	Acute Lymphoblastic Leukemia			0.544	13105_7_SNAP25_SNP25	Acute Lymphoblastic Leukemia
0.278	ERICH1	Acute Lymphoblastic Leukemia			0.108	13107_9_LYPD3_LYPD3	Acute Lymphoblastic Leukemia
0.727	ESYT2	Acute Lymphoblastic Leukemia			0.479	13109_82_NEGR1_NEGR1	Acute Lymphoblastic Leukemia
0.849	EXOSC10	Acute Lymphoblastic Leukemia			0.064	13111_79_BCL6_BCL6	Acute Lymphoblastic Leukemia
0.372	EXT1	Acute Lymphoblastic Leukemia			0.882	13112_179_FSTL1_FSTL1	Acute Lymphoblastic Leukemia
0.98	EZR	Acute Lymphoblastic Leukemia			0.736	13113_7_SPP1_Osteopontin	Acute Lymphoblastic Leukemia
0.773	F2R	Acute Lymphoblastic Leukemia			0.841	13114_50_LUM_Lumican	Acute Lymphoblastic Leukemia
0.933	FADS1	Acute Lymphoblastic Leukemia			0.286	13116_25_CD177_CD177	Acute Lymphoblastic Leukemia
0.868	FADS2	Acute Lymphoblastic Leukemia			0.664	13118_5_SMOC1_SMOC1	Acute Lymphoblastic Leukemia
0.052	FAM101B	Acute Lymphoblastic Leukemia			0.349	13119_26_SERPINA10_protein_Z_inhibitor	Acute Lymphoblastic Leukemia
0.811	FAM104A	Acute Lymphoblastic Leukemia			0.951	13122_19_FLRT2_FLRT2	Acute Lymphoblastic Leukemia
0.934	FAM109A	Acute Lymphoblastic Leukemia			0.043	13123_3_FLRT3_FLRT3	Acute Lymphoblastic Leukemia
0.663	FAM111A	Acute Lymphoblastic Leukemia			0.751	13124_20_ISLR2_ISLR2	Acute Lymphoblastic Leukemia
0.043	FAM117B	Acute Lymphoblastic Leukemia			0.471	13125_45_VTN_Vitronectin	Acute Lymphoblastic Leukemia
0.546	FAM118B	Acute Lymphoblastic Leukemia			0.791	13126_52_DSC2_DSC2	Acute Lymphoblastic Leukemia
0.431	FAM120AOS	Acute Lymphoblastic Leukemia			0.26	13131_5_HK1_HXK1	Acute Lymphoblastic Leukemia
0.957	FAM134B	Acute Lymphoblastic Leukemia			0.276	13132_14_SEMA5A_SEM5A	Acute Lymphoblastic Leukemia
0.622	FAM134C	Acute Lymphoblastic Leukemia			0.267	13133_73_LTBP4_LTBP4	Acute Lymphoblastic Leukemia
0.96	FAM136A	Acute Lymphoblastic Leukemia			0.807	13236_25_WNT3A_WNT3A	Acute Lymphoblastic Leukemia
0.345	FAM153C	Acute Lymphoblastic Leukemia			0.591	13242_134_SHANK3_SHAN3	Acute Lymphoblastic Leukemia
0.113	FAM157C	Acute Lymphoblastic Leukemia			0.22	13268_45_WNT5A_WNT5A	Acute Lymphoblastic Leukemia
0.11	FAM173B	Acute Lymphoblastic Leukemia			0.403	13377_3_CYB561D1_C56D1	Acute Lymphoblastic Leukemia
0.929	FAM177A1	Acute Lymphoblastic Leukemia			0.591	13378_80_C5orf63_YD286	Acute Lymphoblastic Leukemia
0.072	FAM177B	Acute Lymphoblastic Leukemia			0.444	13381_49_B4GALT1_B4GT1	Acute Lymphoblastic Leukemia
0.803	FAM19A1	Acute Lymphoblastic Leukemia			0.507	13386_248_RNF34_RNF34	Acute Lymphoblastic Leukemia
0.707	FAM19A2	Acute Lymphoblastic Leukemia			0.152	13388_57_PCSK1_NEC1	Acute Lymphoblastic Leukemia
0.923	FAM206A	Acute Lymphoblastic Leukemia			0.128	13392_13_ATP1B1_AT1B1	Acute Lymphoblastic Leukemia
0.847	FAM20B	Acute Lymphoblastic Leukemia			0.468	13397_88_DEFB4A_HBD_2	Acute Lymphoblastic Leukemia
0.854	FAM219B	Acute Lymphoblastic Leukemia			0.212	13399_33_RELL1_RELL1	Acute Lymphoblastic Leukemia
0.601	FAM21C	Acute Lymphoblastic Leukemia			0.739	13405_61_SPINK2_ISK2	Acute Lymphoblastic Leukemia
0.819	FAM22E	Acute Lymphoblastic Leukemia			0.952	13416_8_TMEM132D_T132D	Acute Lymphoblastic Leukemia
0.195	FAM46C	Acute Lymphoblastic Leukemia			0.695	13427_66_MAN1C1_MA1C1	Acute Lymphoblastic Leukemia
0.915	FAM63B	Acute Lymphoblastic Leukemia			0.401	13429_3_WFDC10A_WF10A	Acute Lymphoblastic Leukemia
0.981	FAM65A	Acute Lymphoblastic Leukemia			0.849	13434_172_PARVA_PARVA	Acute Lymphoblastic Leukemia
0.698	FAM65B	Acute Lymphoblastic Leukemia			0.405	13439_6_IQCF3_IQCF3	Acute Lymphoblastic Leukemia
0.301	FAM86C1	Acute Lymphoblastic Leukemia			0.066	13441_30_DIXDC1_DIXC1	Acute Lymphoblastic Leukemia
0.984	FAM86FP	Acute Lymphoblastic Leukemia			0.703	13447_42_SPRN_SPRN	Acute Lymphoblastic Leukemia
0.796	FAM86HP	Acute Lymphoblastic Leukemia			0.743	13450_49_USP8_UBP8	Acute Lymphoblastic Leukemia
0.789	FAM86JP	Acute Lymphoblastic Leukemia			0.758	13452_113_SMIM13_SIM13	Acute Lymphoblastic Leukemia
0.716	FARP1	Acute Lymphoblastic Leukemia			0.318	13453_2_MRPL33_RM33	Acute Lymphoblastic Leukemia
0.417	FARSA	Acute Lymphoblastic Leukemia			0.774	13460_4_CHAD_CHAD	Acute Lymphoblastic Leukemia
0.774	FASN	Acute Lymphoblastic Leukemia			0.491	13463_1_PXDN_PXDN	Acute Lymphoblastic Leukemia
0.781	FASTKD3	Acute Lymphoblastic Leukemia			0.565	13465_5_RCAN1_CCP1	Acute Lymphoblastic Leukemia
0.669	FAT2	Acute Lymphoblastic Leukemia			0.509	13468_5_NEURL4_NEUL4	Acute Lymphoblastic Leukemia
0.88	FBP1	Acute Lymphoblastic Leukemia			0.385	13470_43_PTH1R_PTH1R	Acute Lymphoblastic Leukemia
0.476	FBXL5	Acute Lymphoblastic Leukemia			0.538	13473_55_ITPKA_IP3KA	Acute Lymphoblastic Leukemia
0.755	FCHO2	Acute Lymphoblastic Leukemia			0.856	13477_65_LTB4R_LT4R1	Acute Lymphoblastic Leukemia
0.833	FCRL3	Acute Lymphoblastic Leukemia			0.248	13479_8_FAM171A2_F1712	Acute Lymphoblastic Leukemia
0.356	FDFT1	Acute Lymphoblastic Leukemia			0.717	13488_3_ARFIP1_ARFP1	Acute Lymphoblastic Leukemia
0.745	FES	Acute Lymphoblastic Leukemia			0.214	13493_5_GRID1_GRID1	Acute Lymphoblastic Leukemia
0.021	FEZ2	Acute Lymphoblastic Leukemia			0.713	13498_1_MIOX_MIOX	Acute Lymphoblastic Leukemia
0.81	FGFR2	Acute Lymphoblastic Leukemia			0.766	13499_30_F8_Coagulation_Factor_VIII	Acute Lymphoblastic Leukemia
0.336	FGGY	Acute Lymphoblastic Leukemia			0.738	13501_10_SLC35G2_S35G2	Acute Lymphoblastic Leukemia
0.733	FHL2	Acute Lymphoblastic Leukemia			0.227	13502_2_SLC26A11_S2611	Acute Lymphoblastic Leukemia
0.561	FIGNL1	Acute Lymphoblastic Leukemia			0.416	13506_10_DUS2_DUS2L	Acute Lymphoblastic Leukemia
0.816	FLJ20373	Acute Lymphoblastic Leukemia			0.337	13507_51_TRADD_TRADD	Acute Lymphoblastic Leukemia
0.804	FLT3	Acute Lymphoblastic Leukemia			0.351	13510_7_ATP2A3_AT2A3	Acute Lymphoblastic Leukemia
0.557	FLVCR2	Acute Lymphoblastic Leukemia			0.118	13514_121_RAB35_Rab_1C	Acute Lymphoblastic Leukemia
0.209	FMO4	Acute Lymphoblastic Leukemia			0.612	13515_8_RPRD1A_RPR1A	Acute Lymphoblastic Leukemia
0.691	FN1	Acute Lymphoblastic Leukemia			0.153	13516_46_EMC4_TMM85	Acute Lymphoblastic Leukemia
0.166	FNBP1P1	Acute Lymphoblastic Leukemia			0.685	13518_5_ASAP2_ASAP2	Acute Lymphoblastic Leukemia
0.705	FNDC3A	Acute Lymphoblastic Leukemia			0.439	13519_112_ARHGEF25_ARHGP	Acute Lymphoblastic Leukemia
0.732	FNDC3B	Acute Lymphoblastic Leukemia			0.16	13524_25_HS6ST2_H6ST2	Acute Lymphoblastic Leukemia
0.298	FOLR3	Acute Lymphoblastic Leukemia			0.307	13525_17_KCNG4_KCNG4	Acute Lymphoblastic Leukemia
0.739	FPGT	Acute Lymphoblastic Leukemia			0.156	13529_39_NAP1L2_NP1L2	Acute Lymphoblastic Leukemia
0.889	FTSJD1	Acute Lymphoblastic Leukemia			0.063	13534_20_MYOM2_MYOM2	Acute Lymphoblastic Leukemia
0.511	FUCA2	Acute Lymphoblastic Leukemia			0.825	13536_56_POLI_POLI	Acute Lymphoblastic Leukemia
0.66	FURIN	Acute Lymphoblastic Leukemia			0.404	13539_131_KCNN1_KCNN1	Acute Lymphoblastic Leukemia
0.156	FUT10	Acute Lymphoblastic Leukemia			0.455	13540_1_GPR26_GPR26	Acute Lymphoblastic Leukemia
0.834	FUT7	Acute Lymphoblastic Leukemia			0.435	13541_1_MYCT1_MYCT1	Acute Lymphoblastic Leukemia
0.385	FZD1	Acute Lymphoblastic Leukemia			0.548	13545_97_EIF1AD_EIF1A	Acute Lymphoblastic Leukemia
0.355	FZD2	Acute Lymphoblastic Leukemia			0.563	13552_7_SWAP70_SWP70	Acute Lymphoblastic Leukemia
0.001	GALM	Acute Lymphoblastic Leukemia			0.518	13554_78_REPIN1_REPI1	Acute Lymphoblastic Leukemia
0.833	GAPT	Acute Lymphoblastic Leukemia			0.896	13565_2_RBL2_p130	Acute Lymphoblastic Leukemia
0.23	GCC1	Acute Lymphoblastic Leukemia			0.761	13566_2_SSU72_SSU72	Acute Lymphoblastic Leukemia
0.989	GDF15	Acute Lymphoblastic Leukemia			0.356	13574_50_RND1_RND1	Acute Lymphoblastic Leukemia
0.815	GDPD5	Acute Lymphoblastic Leukemia			0.78	13575_40_DVL2_DVL2	Acute Lymphoblastic Leukemia
0.985	GFI1	Acute Lymphoblastic Leukemia			0.881	13587_10_RACGAP1_RGAP1	Acute Lymphoblastic Leukemia
0.714	GGACT	Acute Lymphoblastic Leukemia			0.105	13589_10_APBB3_APBB3	Acute Lymphoblastic Leukemia
0.206	GGNBP2	Acute Lymphoblastic Leukemia			0.427	13595_20_THTPA_THTPA	Acute Lymphoblastic Leukemia
0.16	GHITM	Acute Lymphoblastic Leukemia			0.46	13596_3_RAB27B_RB27B	Acute Lymphoblastic Leukemia
0.286	GIGYF1	Acute Lymphoblastic Leukemia			0.261	13599_15_RABEPK_RABEK	Acute Lymphoblastic Leukemia
0.615	GINM1	Acute Lymphoblastic Leukemia			0.433	13603_7_RFESD_RFESD	Acute Lymphoblastic Leukemia
0.687	GINS3	Acute Lymphoblastic Leukemia			0.459	13604_27_NEURL1_NEUL1	Acute Lymphoblastic Leukemia
0.482	GIT1	Acute Lymphoblastic Leukemia			0.552	13605_16_ANXA10_ANX10	Acute Lymphoblastic Leukemia
0.743	GIT2	Acute Lymphoblastic Leukemia			0.404	13610_9_MAGEA10_MAGE_10	Acute Lymphoblastic Leukemia
0.624	GLB1L2	Acute Lymphoblastic Leukemia			0.612	13613_23_AK5_Adenylate_kinase_isoenzyme_5	Acute Lymphoblastic Leukemia
0.666	GLIS3	Acute Lymphoblastic Leukemia			0.862	13614_6_CREBBP_CREB_binding_protein	Acute Lymphoblastic Leukemia
0.54	GLRX2	Acute Lymphoblastic Leukemia			0.297	13618_15_MAD1L1_MD1L1	Acute Lymphoblastic Leukemia
0.572	GLT1D1	Acute Lymphoblastic Leukemia			0.46	13621_31_AP2A2_AP2A2	Acute Lymphoblastic Leukemia
0.016	GLT25D1	Acute Lymphoblastic Leukemia			0.818	13624_17_NADK_NADK	Acute Lymphoblastic Leukemia
0.487	GLTP	Acute Lymphoblastic Leukemia			0.173	13628_58_GRB14_GRB14	Acute Lymphoblastic Leukemia
0.489	GLYATL1P1	Acute Lymphoblastic Leukemia			0.903	13632_10_ZYX_Zyxin	Acute Lymphoblastic Leukemia
0.873	GM2A	Acute Lymphoblastic Leukemia			0.635	13634_209_PIR_PIR	Acute Lymphoblastic Leukemia
0.767	GMIP	Acute Lymphoblastic Leukemia			0.56	13645_14_DHX38_PRP16	Acute Lymphoblastic Leukemia
0.579	GMNN	Acute Lymphoblastic Leukemia			0.085	13650_11_KCNIP1_KCIP1	Acute Lymphoblastic Leukemia
0.77	GNG2	Acute Lymphoblastic Leukemia			0.097	13652_2_TOM1L1_TM1L1	Acute Lymphoblastic Leukemia
0.622	GNGT2	Acute Lymphoblastic Leukemia			0.284	13653_335_MACROD1_MACD1	Acute Lymphoblastic Leukemia
0.914	GNPTG	Acute Lymphoblastic Leukemia			0.172	13658_31_PDGFC_PDGF_CC	Acute Lymphoblastic Leukemia
0.649	GOLGA6L5	Acute Lymphoblastic Leukemia			0.929	13659_36_ATP13A1_AT131	Acute Lymphoblastic Leukemia
0.446	GOLGA7B	Acute Lymphoblastic Leukemia			0.72	13665_35_PPP2R3A_PP2A__subunit_B	Acute Lymphoblastic Leukemia
0.667	GOLGB1	Acute Lymphoblastic Leukemia			0.652	13666_222_CA10_Carbonic_Anhydrase_X	Acute Lymphoblastic Leukemia
0.525	GOLM1	Acute Lymphoblastic Leukemia			0.632	13669_6_FGFR3_FGFR_3	Acute Lymphoblastic Leukemia
0.895	GPATCH1	Acute Lymphoblastic Leukemia			0.404	13671_40_ELANE_Elastase	Acute Lymphoblastic Leukemia
0.974	GPM6A	Acute Lymphoblastic Leukemia			0.041	13672_3_HSPA6_HSP76	Acute Lymphoblastic Leukemia
0.266	GPNMB	Acute Lymphoblastic Leukemia			0.177	13676_46_INHBB_Inhibin_bB_chain	Acute Lymphoblastic Leukemia
0.799	GPR124	Acute Lymphoblastic Leukemia			0.43	13681_173_CSNK2A2_CSK22	Acute Lymphoblastic Leukemia
0.475	GPR162	Acute Lymphoblastic Leukemia			0.866	13682_47_CSF1R_M_CSF_R	Acute Lymphoblastic Leukemia
0.901	GPR19	Acute Lymphoblastic Leukemia			0.732	13686_2_IL5RA_IL_5_Ra	Acute Lymphoblastic Leukemia
0.985	GPR25	Acute Lymphoblastic Leukemia			0.757	13689_2_ODC1_Ornithine_decarboxylase	Acute Lymphoblastic Leukemia
0.708	GPR65	Acute Lymphoblastic Leukemia			0.092	13691_10_SLC5A8_SC5A8	Acute Lymphoblastic Leukemia
0.71	GRAP2	Acute Lymphoblastic Leukemia			0.42	13698_28_KIAA0319L_K319L	Acute Lymphoblastic Leukemia
0.58	GRK4	Acute Lymphoblastic Leukemia			0.46	13700_10_ANXA2_annexin_II	Acute Lymphoblastic Leukemia
0.427	GS1-124K5.11	Acute Lymphoblastic Leukemia			0.758	13704_5_HMGCS2_HMCS2	Acute Lymphoblastic Leukemia
0.608	GS1-251I9.4	Acute Lymphoblastic Leukemia			0.672	13717_15_FCN2_FCN2	Acute Lymphoblastic Leukemia
0.352	GSTA4	Acute Lymphoblastic Leukemia			0.222	13720_95_PRTN3_Proteinase_3	Acute Lymphoblastic Leukemia
0.78	GTF2H5	Acute Lymphoblastic Leukemia			0.066	13724_27_FGF19_FGF_19	Acute Lymphoblastic Leukemia
0.294	GTPBP3	Acute Lymphoblastic Leukemia			0.516	13729_26_SFXN5_SFXN5	Acute Lymphoblastic Leukemia
0.772	GTPBP4	Acute Lymphoblastic Leukemia			0.792	13733_5_IL12B_IL_12_p40	Acute Lymphoblastic Leukemia
0.906	GUCY1A3	Acute Lymphoblastic Leukemia			0.437	13738_8_INHBA_Inhibin_bA_chain	Acute Lymphoblastic Leukemia
0.484	GUSB	Acute Lymphoblastic Leukemia			0.812	13740_51_FRZB_sFRP_3	Acute Lymphoblastic Leukemia
0.699	GXYLT1	Acute Lymphoblastic Leukemia			0.91	13744_37_IL3RA_IL_3_Ra	Acute Lymphoblastic Leukemia
0.835	GZMA	Acute Lymphoblastic Leukemia			0.386	13748_4_CCL8_MCP_2	Acute Lymphoblastic Leukemia
0.91	H1FX	Acute Lymphoblastic Leukemia			0.182	13929_27_CROT_OCTC	Acute Lymphoblastic Leukemia
0.937	HADH	Acute Lymphoblastic Leukemia			0.47	13930_3_APOBEC3G_ABC3G	Acute Lymphoblastic Leukemia
0.614	HADHA	Acute Lymphoblastic Leukemia			0.488	13932_45_ARHGEF7_COOL_1	Acute Lymphoblastic Leukemia
0.205	HADHB	Acute Lymphoblastic Leukemia			0.28	13933_276_NAB1_NAB1	Acute Lymphoblastic Leukemia
0.664	HAR1A	Acute Lymphoblastic Leukemia			0.713	13934_3_MCF2L_MCF2L	Acute Lymphoblastic Leukemia
0.587	HBM	Acute Lymphoblastic Leukemia			0.893	13939_14_UGP2_UGPA1	Acute Lymphoblastic Leukemia
0.79	HBP1	Acute Lymphoblastic Leukemia			0.154	13941_82_FARS2_SYFM	Acute Lymphoblastic Leukemia
0.787	HBQ1	Acute Lymphoblastic Leukemia			0.31	13942_140_SPSB1_SPSB1	Acute Lymphoblastic Leukemia
0.534	HCG22	Acute Lymphoblastic Leukemia			0.574	13943_38_DPY30_DPY30	Acute Lymphoblastic Leukemia
0.773	HCP5	Acute Lymphoblastic Leukemia			0.118	13944_3_SULT1A3_SULT_1A3	Acute Lymphoblastic Leukemia
0.677	HDAC7	Acute Lymphoblastic Leukemia			0.13	13946_8_DDX23_DDX23	Acute Lymphoblastic Leukemia
0.671	HDDC3	Acute Lymphoblastic Leukemia			0.972	13947_371_NUDT12_NUD12	Acute Lymphoblastic Leukemia
0.601	HEG1	Acute Lymphoblastic Leukemia			0.496	13955_33_DAPK1_DAPK1	Acute Lymphoblastic Leukemia
0.322	HELLS	Acute Lymphoblastic Leukemia			0.615	13959_7_LAP3_LAP	Acute Lymphoblastic Leukemia
0.895	HERC2	Acute Lymphoblastic Leukemia			0.464	13960_15_AGAP3_AGAP3	Acute Lymphoblastic Leukemia
0.465	HERC6	Acute Lymphoblastic Leukemia			0.048	13961_18_KIF3A_KIF3A	Acute Lymphoblastic Leukemia
0.314	HIPK2	Acute Lymphoblastic Leukemia			0.391	13966_30_MYOM3_MYOM3	Acute Lymphoblastic Leukemia
0.492	HIVEP1	Acute Lymphoblastic Leukemia			0.435	13972_4_HSD17B14_DHB14	Acute Lymphoblastic Leukemia
0.755	HIVEP3	Acute Lymphoblastic Leukemia			0.16	13973_62_TTL_TTL	Acute Lymphoblastic Leukemia
0.783	HLA-DOA	Acute Lymphoblastic Leukemia			0.265	13977_28_BARD1_BARD1	Acute Lymphoblastic Leukemia
0.747	HLA-DPB2	Acute Lymphoblastic Leukemia			0.464	13983_27_CRYZ_QOR	Acute Lymphoblastic Leukemia
0.851	HLA-H	Acute Lymphoblastic Leukemia			0.361	13984_23_DDX25_DDX25	Acute Lymphoblastic Leukemia
0.965	HLA-U	Acute Lymphoblastic Leukemia			0.503	13988_67_NMRAL1_NMRL1	Acute Lymphoblastic Leukemia
0.478	HMGCR	Acute Lymphoblastic Leukemia			0.171	13993_20_EPB41L1_E41L1	Acute Lymphoblastic Leukemia
0.726	HMGN1	Acute Lymphoblastic Leukemia			0.51	13994_1_FBL_FBRL	Acute Lymphoblastic Leukemia
0.947	HMOX1	Acute Lymphoblastic Leukemia			0.44	14006_36_GNMT_GNMT	Acute Lymphoblastic Leukemia
0.724	HNMT	Acute Lymphoblastic Leukemia			0.593	14007_22_PAPSS1_PAPS1	Acute Lymphoblastic Leukemia
0.774	HOXA1	Acute Lymphoblastic Leukemia			0.425	14008_22_DCP1A_DCP1A	Acute Lymphoblastic Leukemia
0.181	HPCAL4	Acute Lymphoblastic Leukemia			0.495	14009_65_TNFAIP3_TNFAIP3	Acute Lymphoblastic Leukemia
0.308	HPS6	Acute Lymphoblastic Leukemia			0.323	14011_17_S100A11_S100A11	Acute Lymphoblastic Leukemia
0.901	HRK	Acute Lymphoblastic Leukemia			0.856	14012_17_DHX58_LGP2	Acute Lymphoblastic Leukemia
0.435	HSD17B1	Acute Lymphoblastic Leukemia			0.296	14021_81_MED4_MED4	Acute Lymphoblastic Leukemia
0.81	HSD17B12	Acute Lymphoblastic Leukemia			0.274	14024_196_EDA_EDA	Acute Lymphoblastic Leukemia
0.909	HSD17B14	Acute Lymphoblastic Leukemia			0.539	14026_24_IL17F_IL_17F	Acute Lymphoblastic Leukemia
0.504	HSD17B7	Acute Lymphoblastic Leukemia			0.495	14028_22_PIK3C2A_P3C2A	Acute Lymphoblastic Leukemia
0.543	HSD17B7P2	Acute Lymphoblastic Leukemia			0.506	14029_42_COPS2_CSN2	Acute Lymphoblastic Leukemia
0.96	HSD3B7	Acute Lymphoblastic Leukemia			0.503	14043_12_EEA1_EEA1	Acute Lymphoblastic Leukemia
0.485	HSP90AA1	Acute Lymphoblastic Leukemia			0.096	14045_12_NCOA2_NCOA2	Acute Lymphoblastic Leukemia
0.777	HSPA1B	Acute Lymphoblastic Leukemia			0.078	14047_78_BDNF_BDNF	Acute Lymphoblastic Leukemia
0.416	HSPG2	Acute Lymphoblastic Leukemia			0.538	14048_7_IL1RAP_IL_1_R_AcP	Acute Lymphoblastic Leukemia
0.582	HTATIP2	Acute Lymphoblastic Leukemia			0.657	14054_17_IL15RA_IL_15_Ra	Acute Lymphoblastic Leukemia
0.551	HYAL3	Acute Lymphoblastic Leukemia			0.502	14061_48_TNFSF11_sRANKL	Acute Lymphoblastic Leukemia
0.467	ICA1L	Acute Lymphoblastic Leukemia			0.916	14066_49_MAGI2_MAGI2	Acute Lymphoblastic Leukemia
0.192	ID3	Acute Lymphoblastic Leukemia			0.48	14067_6_PKP2_PKP2	Acute Lymphoblastic Leukemia
0.405	IFI27	Acute Lymphoblastic Leukemia			0.957	14069_61_CA4_Carbonic_Anhydrase_IV	Acute Lymphoblastic Leukemia
0.825	IFIT5	Acute Lymphoblastic Leukemia			0.773	14076_74_CST4_Cystatin_S	Acute Lymphoblastic Leukemia
0.566	IFNG-AS1	Acute Lymphoblastic Leukemia			0.896	14079_14_IL18R1_IL_18_Ra	Acute Lymphoblastic Leukemia
0.715	IFNGR1	Acute Lymphoblastic Leukemia			0.62	14088_38_IGFBP6_IGFBP_6	Acute Lymphoblastic Leukemia
0.275	IFRD1	Acute Lymphoblastic Leukemia			0.674	14091_42_CBR3_Carbonyl_reductase_3	Acute Lymphoblastic Leukemia
0.179	IFT57	Acute Lymphoblastic Leukemia			0.599	14094_29_HBEGF_HB_EGF	Acute Lymphoblastic Leukemia
0.783	IFT74	Acute Lymphoblastic Leukemia			0.396	14100_63_C1QC_C1QC	Acute Lymphoblastic Leukemia
0.528	IGFBP7	Acute Lymphoblastic Leukemia			0.335	14101_2_CNTFR_CNTFR_alpha	Acute Lymphoblastic Leukemia
0.728	IGHV1-46	Acute Lymphoblastic Leukemia			0.213	14106_46_RAP1GDS1_GDP_GTP_exchange_protein	Acute Lymphoblastic Leukemia
0.77	IGHV1-69	Acute Lymphoblastic Leukemia			0.259	14107_1_MTHFS_MTHFS	Acute Lymphoblastic Leukemia
0.377	IGHV3-20	Acute Lymphoblastic Leukemia			0.165	14112_40_RELT_RELT	Acute Lymphoblastic Leukemia
0.878	IGHV3-66	Acute Lymphoblastic Leukemia			0.109	14116_129_S100A4_S100A4	Acute Lymphoblastic Leukemia
0.469	IGHV4-39	Acute Lymphoblastic Leukemia			0.46	14120_2_RNF43_RNF43	Acute Lymphoblastic Leukemia
0.364	IGHVIII-67-4	Acute Lymphoblastic Leukemia			0.562	14121_24_TNFRSF10D_TRAIL_R4	Acute Lymphoblastic Leukemia
0.755	IGLV1-41	Acute Lymphoblastic Leukemia			0.145	14131_37_EFNB2_EFNB2	Acute Lymphoblastic Leukemia
0.706	IGLV3-12	Acute Lymphoblastic Leukemia			0.609	14133_93_IL1R2_IL_1_sRII	Acute Lymphoblastic Leukemia
0.937	IGSF6	Acute Lymphoblastic Leukemia			0.428	14134_49_AMIGO2_AMGO2	Acute Lymphoblastic Leukemia
0.452	IKBIP	Acute Lymphoblastic Leukemia			0.213	14135_3_RXFP1_RXFP1	Acute Lymphoblastic Leukemia
0.438	IKBKAP	Acute Lymphoblastic Leukemia			0.494	14136_234_CD93_C1QR1	Acute Lymphoblastic Leukemia
0.869	IKZF1	Acute Lymphoblastic Leukemia			0.511	14150_7_IL36A_IL_1F6	Acute Lymphoblastic Leukemia
0.876	IL10	Acute Lymphoblastic Leukemia			0.908	14151_4_ISG15_UCRP	Acute Lymphoblastic Leukemia
0.593	IL12RB1	Acute Lymphoblastic Leukemia			0.987	14153_8_EFNA3_Ephrin_A3	Acute Lymphoblastic Leukemia
0.717	IL16	Acute Lymphoblastic Leukemia			0.718	14158_17_ANXA5_Annexin_V	Acute Lymphoblastic Leukemia
0.304	IL18BP	Acute Lymphoblastic Leukemia			0.645	14175_78_SCP2D1_SCP2D	Acute Lymphoblastic Leukemia
0.807	IL1R2	Acute Lymphoblastic Leukemia			0.478	14197_2_PRDM1_PRDM1	Acute Lymphoblastic Leukemia
0.754	IL1RAP	Acute Lymphoblastic Leukemia			0.84	14204_55_FOXJ2_FOXJ2	Acute Lymphoblastic Leukemia
0.134	IL7R	Acute Lymphoblastic Leukemia			0.447	14208_3_RBP7_RET7	Acute Lymphoblastic Leukemia
0.648	ILDR1	Acute Lymphoblastic Leukemia			0.297	14216_35_DDX46_DDX46	Acute Lymphoblastic Leukemia
0.923	ILVBL	Acute Lymphoblastic Leukemia			0.688	14226_120_BHMT2_BHMT2	Acute Lymphoblastic Leukemia
0.851	IMMP2L	Acute Lymphoblastic Leukemia			0.647	14229_5_MOCS3_MOCS3	Acute Lymphoblastic Leukemia
0.268	INO80B	Acute Lymphoblastic Leukemia			0.359	14245_195_SNX7_SNX7	Acute Lymphoblastic Leukemia
0.831	INPP5B	Acute Lymphoblastic Leukemia			0.965	14246_50_DOK2_DOK2	Acute Lymphoblastic Leukemia
0.519	INPP5K	Acute Lymphoblastic Leukemia			0.774	14250_115_BLMH_BLMH	Acute Lymphoblastic Leukemia
0.751	INTS10	Acute Lymphoblastic Leukemia			0.508	14254_27_PTPN4_PTN4	Acute Lymphoblastic Leukemia
0.87	INTS6	Acute Lymphoblastic Leukemia			0.286	14260_112_NET1_ARHG8	Acute Lymphoblastic Leukemia
0.881	IRF5	Acute Lymphoblastic Leukemia			0.833	14268_4_SRXN1_SRXN1	Acute Lymphoblastic Leukemia
0.771	IRS1	Acute Lymphoblastic Leukemia			0.915	14271_23_RAB6B_RAB6B	Acute Lymphoblastic Leukemia
0.575	ISCA2	Acute Lymphoblastic Leukemia			0.386	14273_19_PREP_PPCE	Acute Lymphoblastic Leukemia
0.724	ISG20	Acute Lymphoblastic Leukemia			0.943	14283_12_RAB14_RAB14	Acute Lymphoblastic Leukemia
0.639	ISG20L2	Acute Lymphoblastic Leukemia			0.573	14286_2_NFATC1_NF_ATc1	Acute Lymphoblastic Leukemia
0.639	ISOC2	Acute Lymphoblastic Leukemia			0.279	14287_6_RAB5C_RAB5C	Acute Lymphoblastic Leukemia
0.772	ITFG2	Acute Lymphoblastic Leukemia			0.97	14294_61_MBD1_MBD1	Acute Lymphoblastic Leukemia
0.471	ITGA4	Acute Lymphoblastic Leukemia			0.796	14309_8_HNRNPH1_HNRH1	Acute Lymphoblastic Leukemia
0.944	ITGAD	Acute Lymphoblastic Leukemia			0.632	14314_6_PPIL2_PPIL2	Acute Lymphoblastic Leukemia
0.571	ITGAL	Acute Lymphoblastic Leukemia			0.789	14318_1_VPS29_VPS29	Acute Lymphoblastic Leukemia
0.872	ITGAM	Acute Lymphoblastic Leukemia			0.638	14331_262_DYNLT1_DYLT1	Acute Lymphoblastic Leukemia
0.614	ITGAX	Acute Lymphoblastic Leukemia			0.448	14334_3_RCVRN_RECO	Acute Lymphoblastic Leukemia
0.84	ITGB1BP1	Acute Lymphoblastic Leukemia			0.527	14337_1_TRAPPC3_TPPC3	Acute Lymphoblastic Leukemia
0.256	ITIH2	Acute Lymphoblastic Leukemia			0.496	14593_152_FAM210A_F210A	Acute Lymphoblastic Leukemia
0.369	ITIH4	Acute Lymphoblastic Leukemia			0.3	14599_18_STAB1_STAB1	Acute Lymphoblastic Leukemia
0.318	ITK	Acute Lymphoblastic Leukemia			0.449	14603_51_KIAA0040_KIAA0040	Acute Lymphoblastic Leukemia
0.827	ITM2B	Acute Lymphoblastic Leukemia			0.457	14614_41_NCMAP_CA130	Acute Lymphoblastic Leukemia
0.706	ITM2C	Acute Lymphoblastic Leukemia			0.113	14618_26_VOPP1_ECOP	Acute Lymphoblastic Leukemia
0.965	ITPKB-IT1	Acute Lymphoblastic Leukemia			0.321	14628_72_FBXO3_FBX3	Acute Lymphoblastic Leukemia
0.919	JAK2	Acute Lymphoblastic Leukemia			0.347	14633_26_TMEM185A_T185A	Acute Lymphoblastic Leukemia
0.955	JAZF1	Acute Lymphoblastic Leukemia			0.832	14634_13_LHCGR_LSHR	Acute Lymphoblastic Leukemia
0.737	JHDM1D	Acute Lymphoblastic Leukemia			0.667	14645_253_GSTA4_GSTA4	Acute Lymphoblastic Leukemia
0.628	JMJD7	Acute Lymphoblastic Leukemia			0.744	14662_6_MZF1_MZF1	Acute Lymphoblastic Leukemia
0.345	KATNAL1	Acute Lymphoblastic Leukemia			0.356	14663_44_RNF8_RNF8	Acute Lymphoblastic Leukemia
0.731	KATNBL1	Acute Lymphoblastic Leukemia			0.48	14670_1_SKIL_SKIL	Acute Lymphoblastic Leukemia
0.516	KB-431C1.3	Acute Lymphoblastic Leukemia			0.658	14684_17_CAPN2_CAN2	Acute Lymphoblastic Leukemia
0.444	KB-431C1.4	Acute Lymphoblastic Leukemia			0.225	14685_17_AKT2_PKB_beta	Acute Lymphoblastic Leukemia
0.913	KCNB1	Acute Lymphoblastic Leukemia			0.54	14687_6_PLIN3_M6PBP	Acute Lymphoblastic Leukemia
0.53	KCNJ10	Acute Lymphoblastic Leukemia			0.218	14689_3_SEC13_SEC13	Acute Lymphoblastic Leukemia
0.26	KCNJ15	Acute Lymphoblastic Leukemia			0.225	14692_3_ZNF276_ZN276	Acute Lymphoblastic Leukemia
0.301	KCNK17	Acute Lymphoblastic Leukemia			0.547	14708_59_C8G_CO8G	Acute Lymphoblastic Leukemia
0.852	KCNK6	Acute Lymphoblastic Leukemia			0.368	14711_27_CST6_Cystatin_M	Acute Lymphoblastic Leukemia
0.914	KCNMB4	Acute Lymphoblastic Leukemia			0.628	14748_31_ARHGAP5_RHG05	Acute Lymphoblastic Leukemia
0.937	KCNQ5	Acute Lymphoblastic Leukemia			0.34	15295_81_IGF2_IGF_II	Acute Lymphoblastic Leukemia
0.147	KDM1B	Acute Lymphoblastic Leukemia			0.482	15297_3_S100A3_S100A3	Acute Lymphoblastic Leukemia
0.611	KHNYN	Acute Lymphoblastic Leukemia			0.709	15300_66_CCDC134_CC134	Acute Lymphoblastic Leukemia
0.689	KIAA0226L	Acute Lymphoblastic Leukemia			0.279	15304_1_REG3A_PAP1	Acute Lymphoblastic Leukemia
0.971	KIAA0247	Acute Lymphoblastic Leukemia			0.24	15305_7_SCGN_Secretagogin	Acute Lymphoblastic Leukemia
0.505	KIAA1109	Acute Lymphoblastic Leukemia			0.893	15308_108_VWC2_VWC2	Acute Lymphoblastic Leukemia
0.328	KIAA1279	Acute Lymphoblastic Leukemia			0.769	15316_262_TXNL4B_TXN4B	Acute Lymphoblastic Leukemia
0.402	KIAA1407	Acute Lymphoblastic Leukemia			0.35	15318_75_S100A10_Calpactin_I_light_chain	Acute Lymphoblastic Leukemia
0.355	KIAA1468	Acute Lymphoblastic Leukemia			0.724	15324_58_FTL_Ferritin_light_chain	Acute Lymphoblastic Leukemia
0.364	KIAA1522	Acute Lymphoblastic Leukemia			0.664	15326_64_GBP1_GBP1	Acute Lymphoblastic Leukemia
0.517	KIAA1524	Acute Lymphoblastic Leukemia			0.618	15331_47_RBBP4_RBBP4	Acute Lymphoblastic Leukemia
0.185	KIAA1551	Acute Lymphoblastic Leukemia			0.022	15333_11_SDF2_SDF2	Acute Lymphoblastic Leukemia
0.576	KIAA1737	Acute Lymphoblastic Leukemia			0.872	15343_337_KNG1_Kininogen__HMW__Two_Chain	Acute Lymphoblastic Leukemia
0.358	KIAA2013	Acute Lymphoblastic Leukemia			0.286	15358_28_SCG5_7B2	Acute Lymphoblastic Leukemia
0.225	KIF19	Acute Lymphoblastic Leukemia			0.599	15363_32_APOA5_Apo_A_V	Acute Lymphoblastic Leukemia
0.514	KIF20B	Acute Lymphoblastic Leukemia			0.529	15364_101_APOC1_Apo_C_I	Acute Lymphoblastic Leukemia
0.927	KIF24	Acute Lymphoblastic Leukemia			0.043	15367_38_BPIFB1_LPLC1	Acute Lymphoblastic Leukemia
0.55	KIF26A	Acute Lymphoblastic Leukemia			0.582	15370_5_BOLA1_BOLA1	Acute Lymphoblastic Leukemia
0.497	KIF27	Acute Lymphoblastic Leukemia			0.623	15372_43_BRD2_BRD2	Acute Lymphoblastic Leukemia
0.807	KIR3DL2	Acute Lymphoblastic Leukemia			0.851	15375_49_CPB1_Carboxypeptidase_B1	Acute Lymphoblastic Leukemia
0.469	KLC1	Acute Lymphoblastic Leukemia			0.866	15376_134_CTSE_CATE	Acute Lymphoblastic Leukemia
0.959	KLF12	Acute Lymphoblastic Leukemia			0.309	15383_200_EDN3_Endothelin_3	Acute Lymphoblastic Leukemia
0.641	KLF9	Acute Lymphoblastic Leukemia			0.883	15384_15_KL_KLOTHO	Acute Lymphoblastic Leukemia
0.332	KLHDC7A	Acute Lymphoblastic Leukemia			0.807	15385_116_FABP2_FABP2	Acute Lymphoblastic Leukemia
0.546	KLHL3	Acute Lymphoblastic Leukemia			0.995	15387_44_NRP2_Neuropilin_2	Acute Lymphoblastic Leukemia
0.861	KNDC1	Acute Lymphoblastic Leukemia			0.772	15388_24_FCGR3A_FcRIIIa	Acute Lymphoblastic Leukemia
0.948	KRIT1	Acute Lymphoblastic Leukemia			0.441	15390_3_GAL_Galanin	Acute Lymphoblastic Leukemia
0.986	KRT18P8	Acute Lymphoblastic Leukemia			0.371	15391_114_GAS6_GAS_6	Acute Lymphoblastic Leukemia
0.966	KRT8P12	Acute Lymphoblastic Leukemia			0.193	15394_79_UNC5B_UNC5B	Acute Lymphoblastic Leukemia
0.637	KTN1	Acute Lymphoblastic Leukemia			0.885	15395_15_GSTM1_GST_M1_1	Acute Lymphoblastic Leukemia
0.366	L1TD1	Acute Lymphoblastic Leukemia			0.174	15413_3_LCAT_LCAT	Acute Lymphoblastic Leukemia
0.729	L3MBTL2	Acute Lymphoblastic Leukemia			0.788	15414_316_LDHA_LDHA	Acute Lymphoblastic Leukemia
0.221	L3MBTL3	Acute Lymphoblastic Leukemia			0.881	15416_54_LYG2_LYG2	Acute Lymphoblastic Leukemia
0.557	LA16c-358B7.3	Acute Lymphoblastic Leukemia			0.868	15418_25_MAPK10_MK10	Acute Lymphoblastic Leukemia
0.827	LAX1	Acute Lymphoblastic Leukemia			0.292	15419_15_MMP20_MMP20	Acute Lymphoblastic Leukemia
0.111	LBH	Acute Lymphoblastic Leukemia			0.678	15426_5_NEU1_NEUR1	Acute Lymphoblastic Leukemia
0.882	LCA5L	Acute Lymphoblastic Leukemia			0.071	15427_35_LOXL3_LOXL3	Acute Lymphoblastic Leukemia
0.151	LDLRAD3	Acute Lymphoblastic Leukemia			0.455	15430_165_OPTC_OPT	Acute Lymphoblastic Leukemia
0.969	LEMD2	Acute Lymphoblastic Leukemia			0.946	15431_31_OTC_OTCase	Acute Lymphoblastic Leukemia
0.898	LGALS2	Acute Lymphoblastic Leukemia			0.724	15432_1_OTOR_Otoraplin	Acute Lymphoblastic Leukemia
0.246	LIG1	Acute Lymphoblastic Leukemia			0.357	15440_57_PCSK2_NEC2	Acute Lymphoblastic Leukemia
0.488	LILRB2	Acute Lymphoblastic Leukemia			0.314	15441_6_GM2A_SAP3	Acute Lymphoblastic Leukemia
0.486	LIMS2	Acute Lymphoblastic Leukemia			0.744	15444_45_SERPINB4_SCCA2	Acute Lymphoblastic Leukemia
0.327	LIN7A	Acute Lymphoblastic Leukemia			0.366	15446_25_NRG1_SMDF	Acute Lymphoblastic Leukemia
0.748	LIN9	Acute Lymphoblastic Leukemia			0.42	15447_45_SORD_Sorbitol_dehydrogenase	Acute Lymphoblastic Leukemia
0.315	LINC00092	Acute Lymphoblastic Leukemia			0.915	15449_33_TIMD4_TIM_4	Acute Lymphoblastic Leukemia
0.841	LINC00526	Acute Lymphoblastic Leukemia			0.187	15452_5_NT5E_5__Nucleotidase	Acute Lymphoblastic Leukemia
0.339	LINC00565	Acute Lymphoblastic Leukemia			0.701	15453_3_AMBP_a1_Microglobulin	Acute Lymphoblastic Leukemia
0.313	LINC00665	Acute Lymphoblastic Leukemia			0.499	15455_40_ADAM15_ADA15	Acute Lymphoblastic Leukemia
0.622	LINC00683	Acute Lymphoblastic Leukemia			0.927	15462_28_CD8A_CD8A	Acute Lymphoblastic Leukemia
0.867	LL22NC03-86G7.1	Acute Lymphoblastic Leukemia			0.052	15467_10_CTHRC1_CTHR1	Acute Lymphoblastic Leukemia
0.811	LMBR1	Acute Lymphoblastic Leukemia			0.604	15468_14_CFHR1_FHR1	Acute Lymphoblastic Leukemia
0.686	LMCD1	Acute Lymphoblastic Leukemia			0.211	15470_11_HEXB_Hexosaminidase_B	Acute Lymphoblastic Leukemia
0.929	LMF2	Acute Lymphoblastic Leukemia			0.594	15471_29_PNLIPRP2_LIPR2	Acute Lymphoblastic Leukemia
0.342	LMNA	Acute Lymphoblastic Leukemia			0.187	15472_16_LRP11_LRP11	Acute Lymphoblastic Leukemia
0.958	LMTK2	Acute Lymphoblastic Leukemia			0.358	15475_4_PLTP_PLTP	Acute Lymphoblastic Leukemia
0.932	LNX2	Acute Lymphoblastic Leukemia			0.445	15476_6_REG3G_REG3G	Acute Lymphoblastic Leukemia
0.481	LOXL3	Acute Lymphoblastic Leukemia			0.755	15480_2_VNN2_VNN2	Acute Lymphoblastic Leukemia
0.871	LPAR2	Acute Lymphoblastic Leukemia			0.733	15481_45_CAMP_LL_37	Acute Lymphoblastic Leukemia
0.151	LPCAT2	Acute Lymphoblastic Leukemia			0.504	15482_12_A2ML1_A2ML1	Acute Lymphoblastic Leukemia
0.509	LPIN2	Acute Lymphoblastic Leukemia			0.717	15483_377_AGRN_Agrin	Acute Lymphoblastic Leukemia
0.753	LRFN2	Acute Lymphoblastic Leukemia			0.839	15486_126_AOC1_ABP1	Acute Lymphoblastic Leukemia
0.781	LRP3	Acute Lymphoblastic Leukemia			0.307	15487_164_CES1_carboxylesterase__liver	Acute Lymphoblastic Leukemia
0.687	LRRC33	Acute Lymphoblastic Leukemia			0.234	15491_20_CD248_CD248	Acute Lymphoblastic Leukemia
0.777	LRRC37A16P	Acute Lymphoblastic Leukemia			0.844	15494_11_FGFBP1_FGFP1	Acute Lymphoblastic Leukemia
0.614	LRRC37A4P	Acute Lymphoblastic Leukemia			0.848	15495_9_FOLR3_FOLR3	Acute Lymphoblastic Leukemia
0.453	LRRC4	Acute Lymphoblastic Leukemia			0.412	15499_11_ATRN_Attractin	Acute Lymphoblastic Leukemia
0.327	LRRC6	Acute Lymphoblastic Leukemia			0.509	15503_15_LEFTY2_Lefty_A	Acute Lymphoblastic Leukemia
0.503	LRRFIP2	Acute Lymphoblastic Leukemia			0.471	15503_20_LEFTY2_Lefty_A	Acute Lymphoblastic Leukemia
0.868	LRRIQ3	Acute Lymphoblastic Leukemia			0.458	15504_39_BIRC7_Livin_B	Acute Lymphoblastic Leukemia
0.805	LRWD1	Acute Lymphoblastic Leukemia			0.476	15509_2_NAGLU_NAG	Acute Lymphoblastic Leukemia
0.7	LSM14B	Acute Lymphoblastic Leukemia			0.962	15511_37_NPTXR_NPTXR	Acute Lymphoblastic Leukemia
0.946	LSM7	Acute Lymphoblastic Leukemia			0.364	15513_108_PRSS8_Prostasin	Acute Lymphoblastic Leukemia
0.547	LSP1	Acute Lymphoblastic Leukemia			0.06	15514_26_BCHE_Pseudocholinesterase	Acute Lymphoblastic Leukemia
0.452	LSR	Acute Lymphoblastic Leukemia			0.241	15515_2_SAA1_SAA	Acute Lymphoblastic Leukemia
0.767	LTBR	Acute Lymphoblastic Leukemia			0.71	15516_12_SAA4_SAA_4	Acute Lymphoblastic Leukemia
0.366	LY86	Acute Lymphoblastic Leukemia			0.389	15521_4_CLSTN1_Alcadein_alpha_1	Acute Lymphoblastic Leukemia
0.403	LYG1	Acute Lymphoblastic Leukemia			0.691	15522_2_GLIPR2_GAPR1	Acute Lymphoblastic Leukemia
0.421	LYRM4	Acute Lymphoblastic Leukemia			0.332	15523_9_ALAD_HEM2	Acute Lymphoblastic Leukemia
0.51	MAGI2-AS3	Acute Lymphoblastic Leukemia			0.582	15525_294_ADH1C_ADH1G	Acute Lymphoblastic Leukemia
0.877	MAK16	Acute Lymphoblastic Leukemia			0.763	15526_33_GSS_GSHB	Acute Lymphoblastic Leukemia
0.756	MAML3	Acute Lymphoblastic Leukemia			0.21	15530_33_EPHB4_EphB4	Acute Lymphoblastic Leukemia
0.745	MAN1B1	Acute Lymphoblastic Leukemia			0.689	15533_97_MSR1_Macrophage_scavenger_receptor	Acute Lymphoblastic Leukemia
0.557	MAN2B1	Acute Lymphoblastic Leukemia			0.684	15535_3_PRSS27_Marapsin	Acute Lymphoblastic Leukemia
0.879	MANEA	Acute Lymphoblastic Leukemia			0.706	15539_15_SLITRK1_SLIK1	Acute Lymphoblastic Leukemia
0.956	MANSC1	Acute Lymphoblastic Leukemia			0.828	15540_6_VIM_Vimentin	Acute Lymphoblastic Leukemia
0.715	MAP3K9	Acute Lymphoblastic Leukemia			0.867	15544_25_KLK14_kallikrein_14	Acute Lymphoblastic Leukemia
0.162	MAP4K5	Acute Lymphoblastic Leukemia			0.498	15545_13_PPP3R1_Calcineurin_B_a	Acute Lymphoblastic Leukemia
0.138	MAP7D1	Acute Lymphoblastic Leukemia			0.57	15548_35_PHGDH_SERA	Acute Lymphoblastic Leukemia
0.879	MARC1	Acute Lymphoblastic Leukemia			0.808	15556_49_AMY2B_Alpha_amylase_2B	Acute Lymphoblastic Leukemia
0.871	2025-03-06	Acute Lymphoblastic Leukemia			0.673	15558_63_ENPEP_AMPE	Acute Lymphoblastic Leukemia
0.84	MARK4	Acute Lymphoblastic Leukemia			0.433	15559_5_ANTXR2_ANTR2	Acute Lymphoblastic Leukemia
0.941	MARVELD1	Acute Lymphoblastic Leukemia			0.339	15560_52_TCN2_Apo_TC_II	Acute Lymphoblastic Leukemia
0.879	MAVS	Acute Lymphoblastic Leukemia			0.966	15562_24_GUSB_BGLR	Acute Lymphoblastic Leukemia
0.406	MAX	Acute Lymphoblastic Leukemia			0.406	15565_102_MUC16_CA125	Acute Lymphoblastic Leukemia
0.704	MBOAT2	Acute Lymphoblastic Leukemia			0.862	15566_10_CNN1_Calponin_1	Acute Lymphoblastic Leukemia
0.931	MBTPS1	Acute Lymphoblastic Leukemia			0.502	15569_15_COL2A1_Collagen_II	Acute Lymphoblastic Leukemia
0.953	MCM3AP	Acute Lymphoblastic Leukemia			0.26	15570_99_CR2_Complement_receptor_type_2	Acute Lymphoblastic Leukemia
0.721	MCM4	Acute Lymphoblastic Leukemia			0.91	15573_110_NCAN_CSPG3	Acute Lymphoblastic Leukemia
0.857	MCTP1	Acute Lymphoblastic Leukemia			0.831	15576_158_RNASE3_ECP	Acute Lymphoblastic Leukemia
0.329	MDM1	Acute Lymphoblastic Leukemia			0.393	15579_26_ENPP6_ENPP6	Acute Lymphoblastic Leukemia
0.373	MDS2	Acute Lymphoblastic Leukemia			0.463	15580_2_EPHA7_EPHA7	Acute Lymphoblastic Leukemia
0.522	MED11	Acute Lymphoblastic Leukemia			0.822	15582_25_FCN1_FCN1	Acute Lymphoblastic Leukemia
0.616	MED17	Acute Lymphoblastic Leukemia			0.677	15583_18_FCRLB_FCRLB	Acute Lymphoblastic Leukemia
0.718	MED22	Acute Lymphoblastic Leukemia			0.922	15584_9_CFHR2_FHR2	Acute Lymphoblastic Leukemia
0.688	MED4	Acute Lymphoblastic Leukemia			0.62	15585_304_FBLN5_fibulin_5	Acute Lymphoblastic Leukemia
0.572	MEGF9	Acute Lymphoblastic Leukemia			0.562	15587_20_FOLR2_FOLR2	Acute Lymphoblastic Leukemia
0.151	MERTK	Acute Lymphoblastic Leukemia			0.687	15589_1_GC_Gc_Globulin__Mixed_Type	Acute Lymphoblastic Leukemia
0.676	METTL13	Acute Lymphoblastic Leukemia			0.889	15594_47_HTRA1_HTRA1	Acute Lymphoblastic Leukemia
1	METTL22	Acute Lymphoblastic Leukemia			0.912	15602_43_IL6R_IL_6_sRa	Acute Lymphoblastic Leukemia
0.735	METTL2B	Acute Lymphoblastic Leukemia			0.564	15604_18_MAPK9_JNK2	Acute Lymphoblastic Leukemia
0.815	MFHAS1	Acute Lymphoblastic Leukemia			0.16	15606_19_KRT19_Keratin_19	Acute Lymphoblastic Leukemia
0.627	MFN2	Acute Lymphoblastic Leukemia			0.909	15607_56_PKLR_KPYR	Acute Lymphoblastic Leukemia
0.815	MFSD4	Acute Lymphoblastic Leukemia			0.184	15610_72_LAP3_LAP	Acute Lymphoblastic Leukemia
0.216	MFSD6L	Acute Lymphoblastic Leukemia			0.839	15613_16_PNLIP_LIPP	Acute Lymphoblastic Leukemia
0.574	MGA	Acute Lymphoblastic Leukemia			0.621	15614_168_LILRA2_LIRA2	Acute Lymphoblastic Leukemia
0.694	MGAT4B	Acute Lymphoblastic Leukemia			0.407	15615_8_LILRB3_LIRB3	Acute Lymphoblastic Leukemia
0.677	MGLL	Acute Lymphoblastic Leukemia			0.528	15620_4_NLGN1_NLGN1	Acute Lymphoblastic Leukemia
0.52	MICA	Acute Lymphoblastic Leukemia			0.542	15622_13_OPCML_OBCAM	Acute Lymphoblastic Leukemia
0.779	MIOS	Acute Lymphoblastic Leukemia			0.814	15626_223_HSPG2_Perlecan	Acute Lymphoblastic Leukemia
0.451	MIR4420	Acute Lymphoblastic Leukemia			0.272	15633_6_RBP4_RBP	Acute Lymphoblastic Leukemia
0.139	MIS12	Acute Lymphoblastic Leukemia			0.399	15635_4_SMOC2_SMOC2	Acute Lymphoblastic Leukemia
0.809	MIS18BP1	Acute Lymphoblastic Leukemia			0.843	15636_49_SORCS1_SORC1	Acute Lymphoblastic Leukemia
0.854	MKKS	Acute Lymphoblastic Leukemia			0.262	15641_20_TMEFF1_TEFF1	Acute Lymphoblastic Leukemia
0.766	MKNK1-AS1	Acute Lymphoblastic Leukemia			0.555	15644_1_BTD_Biotinidase	Acute Lymphoblastic Leukemia
0.744	MKNK1	Acute Lymphoblastic Leukemia			0.518	15653_9_COL10A1_COAA1	Acute Lymphoblastic Leukemia
0.733	MLKL	Acute Lymphoblastic Leukemia			0.104	15667_39_BMP4_BMP_4	Acute Lymphoblastic Leukemia
0.833	MLLT11	Acute Lymphoblastic Leukemia			0.223	15668_19_BMP8B_BMP_8	Acute Lymphoblastic Leukemia
0.607	MLLT6	Acute Lymphoblastic Leukemia			0.065	15669_7_BRAF_BRAF1	Acute Lymphoblastic Leukemia
0.562	MMP14	Acute Lymphoblastic Leukemia			0.065	15670_15_C1QL2_C1QL2	Acute Lymphoblastic Leukemia
0.872	MOAP1	Acute Lymphoblastic Leukemia			0.294	15675_3_CEBPB_CEBPB	Acute Lymphoblastic Leukemia
0.995	MOB3C	Acute Lymphoblastic Leukemia			0.786	15678_71_DKK2_DKK2	Acute Lymphoblastic Leukemia
0.937	MON1B	Acute Lymphoblastic Leukemia			0.299	15686_49_INHBC_INHBC	Acute Lymphoblastic Leukemia
0.933	MORC3	Acute Lymphoblastic Leukemia			0.724	15688_30_LMAN1_Mannose_binding_lectin	Acute Lymphoblastic Leukemia
0.619	MORN1	Acute Lymphoblastic Leukemia			0.575	15692_300_NODAL_NODAL	Acute Lymphoblastic Leukemia
0.68	MPC1	Acute Lymphoblastic Leukemia			0.687	15698_6_TXLNA_TXLNA	Acute Lymphoblastic Leukemia
0.631	MPC2	Acute Lymphoblastic Leukemia			0.311	16015_19_GPT_ALT	Acute Lymphoblastic Leukemia
0.881	MPZL1	Acute Lymphoblastic Leukemia			0.138	16021_30_CDH8_Cadherin_8	Acute Lymphoblastic Leukemia
0.765	MRGBP	Acute Lymphoblastic Leukemia			0.256	16035_8_FLT4_VEGF_sR3	Acute Lymphoblastic Leukemia
0.236	MRPL34	Acute Lymphoblastic Leukemia			0.591	16043_30_SHC1_SHC1	Acute Lymphoblastic Leukemia
0.387	MRPL35	Acute Lymphoblastic Leukemia			0.828	16049_43_OLR1_OLR1	Acute Lymphoblastic Leukemia
0.216	MRPL52	Acute Lymphoblastic Leukemia			0.129	16055_3_CFHR5_complement_factor_H_related_5	Acute Lymphoblastic Leukemia
0.446	MRPL55	Acute Lymphoblastic Leukemia			0.665	16057_6_IGF2R_IGF_II_receptor	Acute Lymphoblastic Leukemia
0.331	MRPS7	Acute Lymphoblastic Leukemia			0.358	16060_99_NID2_NID2	Acute Lymphoblastic Leukemia
0.947	MSANTD4	Acute Lymphoblastic Leukemia			0.584	16070_7_WIF1_WIF_1	Acute Lymphoblastic Leukemia
0.553	MSH3	Acute Lymphoblastic Leukemia			0.095	16074_12_GRAP2_GRB2_related_adapter_protein_2	Acute Lymphoblastic Leukemia
0.969	MST1	Acute Lymphoblastic Leukemia			0.358	16079_2_TEC_TEC	Acute Lymphoblastic Leukemia
0.845	MST1P2	Acute Lymphoblastic Leukemia			0.4	16081_38_AKR1B10_Aldose_reductase_like	Acute Lymphoblastic Leukemia
0.227	MTERFD2	Acute Lymphoblastic Leukemia			0.527	16288_17_EPHA4_EPHA4	Acute Lymphoblastic Leukemia
0.932	MTHFD1L	Acute Lymphoblastic Leukemia			0.796	16293_1_GHRH_Growth_hormone_releasing_factor	Acute Lymphoblastic Leukemia
0.691	MTHFD2	Acute Lymphoblastic Leukemia			0.337	16296_43_LGR5_LGR5	Acute Lymphoblastic Leukemia
0.622	MTHFS	Acute Lymphoblastic Leukemia			0.353	16299_13_TIGIT_TIGIT	Acute Lymphoblastic Leukemia
0.234	MTPN	Acute Lymphoblastic Leukemia			0.212	16300_4_TREM2_TREM2	Acute Lymphoblastic Leukemia
0.139	MTRR	Acute Lymphoblastic Leukemia			0.285	16302_11_BPIFA2_SPLC2	Acute Lymphoblastic Leukemia
0.984	MUC20	Acute Lymphoblastic Leukemia			0.291	16304_6_LGR4_LGR4	Acute Lymphoblastic Leukemia
0.509	MVB12A	Acute Lymphoblastic Leukemia			0.227	16305_10_CDH11_Cadherin_11	Acute Lymphoblastic Leukemia
0.676	MVK	Acute Lymphoblastic Leukemia			0.653	16307_22_UNC5D_UNC5H4	Acute Lymphoblastic Leukemia
0.927	MX1	Acute Lymphoblastic Leukemia			0.269	16309_30_DKKL1_Soggy_1	Acute Lymphoblastic Leukemia
0.871	MYBPC3	Acute Lymphoblastic Leukemia			0.214	16312_45_CDH6_Cadherin_6	Acute Lymphoblastic Leukemia
0.229	MYBPH	Acute Lymphoblastic Leukemia			0.9	16315_105_FLT1_VEGF_sR1	Acute Lymphoblastic Leukemia
0.968	MYCBPAP	Acute Lymphoblastic Leukemia			0.082	16317_20_DSG3_Desmoglein_3	Acute Lymphoblastic Leukemia
0.558	MYCL1	Acute Lymphoblastic Leukemia			0.792	16323_8_NRXN3_NRX3A	Acute Lymphoblastic Leukemia
0.536	MYH10	Acute Lymphoblastic Leukemia			0.41	16324_38_TLR1_TLR1	Acute Lymphoblastic Leukemia
0.718	MYO19	Acute Lymphoblastic Leukemia			0.205	16551_14_STAT5B_STA5B	Acute Lymphoblastic Leukemia
0.853	MYO1E	Acute Lymphoblastic Leukemia			0.914	16558_2_MYOC_MYOC	Acute Lymphoblastic Leukemia
0.781	MYO5A	Acute Lymphoblastic Leukemia			0.816	16561_9_A1BG_Alpha_1B_glycoprotein	Acute Lymphoblastic Leukemia
0.472	MYO5B	Acute Lymphoblastic Leukemia			0.144	16585_16_B3GNT4_B3GN4	Acute Lymphoblastic Leukemia
0.315	MYO7A	Acute Lymphoblastic Leukemia			0.451	16587_1_CSN2_Beta_casein	Acute Lymphoblastic Leukemia
0.296	MYPOP	Acute Lymphoblastic Leukemia			0.396	16591_71_CHIA_CHIA	Acute Lymphoblastic Leukemia
0.452	NAIP	Acute Lymphoblastic Leukemia			0.903	16593_3_FADD_FADD	Acute Lymphoblastic Leukemia
0.649	NANOS1	Acute Lymphoblastic Leukemia			0.541	16594_44_FAIM_FAIM1	Acute Lymphoblastic Leukemia
0.124	NAPG	Acute Lymphoblastic Leukemia			0.414	16599_38_GPN1_GPN1	Acute Lymphoblastic Leukemia
0.48	NAPSA	Acute Lymphoblastic Leukemia			0.393	16606_85_AKR1B1_Aldose_reductase	Acute Lymphoblastic Leukemia
0.765	NAPSB	Acute Lymphoblastic Leukemia			0.464	16607_78_GSN_Gelsolin	Acute Lymphoblastic Leukemia
0.543	NAT6	Acute Lymphoblastic Leukemia			0.079	16609_106_KIRREL2_KIRR2	Acute Lymphoblastic Leukemia
0.423	NBPF1	Acute Lymphoblastic Leukemia			0.107	16610_13_LRP10_LRP10	Acute Lymphoblastic Leukemia
0.616	NBPF2P	Acute Lymphoblastic Leukemia			0.342	16612_28_SDC3_SDC3	Acute Lymphoblastic Leukemia
0.519	NCAPD2	Acute Lymphoblastic Leukemia			0.344	16613_3_CDH17_CAD17	Acute Lymphoblastic Leukemia
0.559	NCEH1	Acute Lymphoblastic Leukemia			0.877	16614_27_RSPO1_RSPO1	Acute Lymphoblastic Leukemia
0.615	NCF1C	Acute Lymphoblastic Leukemia			0.527	16616_137_ENO3_ENOB	Acute Lymphoblastic Leukemia
0.965	NCKAP1L	Acute Lymphoblastic Leukemia			0.864	16618_7_CD69_CD69	Acute Lymphoblastic Leukemia
0.633	NDUFAF3	Acute Lymphoblastic Leukemia			0.636	16620_26_LY75_LY75	Acute Lymphoblastic Leukemia
0.581	NDUFAF5	Acute Lymphoblastic Leukemia			0.164	16748_1_BMP3_BMP_3	Acute Lymphoblastic Leukemia
0.762	NDUFC1	Acute Lymphoblastic Leukemia			0.361	16749_79_GDF10_BMP_3b	Acute Lymphoblastic Leukemia
0.974	NDUFS2	Acute Lymphoblastic Leukemia			0.939	16753_46_COL6A2_CO6A2	Acute Lymphoblastic Leukemia
0.999	NEDD9	Acute Lymphoblastic Leukemia			0.29	16754_40_CASK_CSKP	Acute Lymphoblastic Leukemia
0.461	NEFH	Acute Lymphoblastic Leukemia			0.451	16755_195_GDF3_GDF_3	Acute Lymphoblastic Leukemia
0.949	NELFCD	Acute Lymphoblastic Leukemia			0.387	16760_2_IL26_IL_26	Acute Lymphoblastic Leukemia
0.531	NELL2	Acute Lymphoblastic Leukemia			0.863	16763_11_LECT2_LECT2	Acute Lymphoblastic Leukemia
0.548	NEO1	Acute Lymphoblastic Leukemia			0.405	16770_3_REG1B_REG1B	Acute Lymphoblastic Leukemia
0.937	NFRKB	Acute Lymphoblastic Leukemia			0.878	16773_29_SCUBE3_SCUB3	Acute Lymphoblastic Leukemia
0.941	NFYA	Acute Lymphoblastic Leukemia			0.913	16781_2_ENGASE_ENASE	Acute Lymphoblastic Leukemia
0.33	NHSL1	Acute Lymphoblastic Leukemia			0.06	16785_45_DEFA5_HD_5	Acute Lymphoblastic Leukemia
0.2	NINJ1	Acute Lymphoblastic Leukemia			0.331	16792_4_SIGLEC5_Siglec_5	Acute Lymphoblastic Leukemia
0.468	NIPA1	Acute Lymphoblastic Leukemia			0.236	16802_31_OCIAD1_OCAD1	Acute Lymphoblastic Leukemia
0.991	NIPAL3	Acute Lymphoblastic Leukemia			0.88	16805_5_PDE5A_PDE5A	Acute Lymphoblastic Leukemia
0.948	NIPSNAP3A	Acute Lymphoblastic Leukemia			0.472	16807_35_TNNT3_TNNT3	Acute Lymphoblastic Leukemia
0.829	NLRC4	Acute Lymphoblastic Leukemia			0.671	16809_1_NME4_NDKM	Acute Lymphoblastic Leukemia
0.071	NLRP2	Acute Lymphoblastic Leukemia			0.111	16814_13_FHL1_SLIM_1	Acute Lymphoblastic Leukemia
0.556	NMB	Acute Lymphoblastic Leukemia			0.877	16818_200_CDCP1_CDCP1	Acute Lymphoblastic Leukemia
0.997	NME8	Acute Lymphoblastic Leukemia			0.606	16823_75_APOL3_APOL3	Acute Lymphoblastic Leukemia
0.934	NNT	Acute Lymphoblastic Leukemia			0.585	16825_20_ATXN3_ATX3	Acute Lymphoblastic Leukemia
0.502	NOD2	Acute Lymphoblastic Leukemia			0.804	16828_8_COL6A1_Collagen_a1_VI_	Acute Lymphoblastic Leukemia
0.832	NOL9	Acute Lymphoblastic Leukemia			0.479	16852_10_PDZK1_NHRF3	Acute Lymphoblastic Leukemia
0.679	NOM1	Acute Lymphoblastic Leukemia			0.333	16854_17_LSM4_LSM4	Acute Lymphoblastic Leukemia
0.44	NPC2	Acute Lymphoblastic Leukemia			0.689	16856_79_MAPRE2_MARE2	Acute Lymphoblastic Leukemia
0.545	NRBP1	Acute Lymphoblastic Leukemia			0.558	16858_384_RCN3_RCN3	Acute Lymphoblastic Leukemia
0.741	NRDE2	Acute Lymphoblastic Leukemia			0.445	16859_100_SH3GLB1_SHLB1	Acute Lymphoblastic Leukemia
0.893	NRG1	Acute Lymphoblastic Leukemia			0.915	16872_248_GSTZ1_MAAI	Acute Lymphoblastic Leukemia
0.589	NRP1	Acute Lymphoblastic Leukemia			0.704	16877_19_MSRB2_MSRB2	Acute Lymphoblastic Leukemia
0.676	NSFL1C	Acute Lymphoblastic Leukemia			0.89	16890_37_ADAMTSL1_ATL1	Acute Lymphoblastic Leukemia
0.525	NSUN5P2	Acute Lymphoblastic Leukemia			0.416	16892_23_ENPP2_ENPP2	Acute Lymphoblastic Leukemia
0.044	NSUN7	Acute Lymphoblastic Leukemia			0.472	16900_29_MDGA1_MDGA1	Acute Lymphoblastic Leukemia
0.362	NT5DC2	Acute Lymphoblastic Leukemia			0.352	16907_3_CADM2_Nectin_like_protein_3	Acute Lymphoblastic Leukemia
0.984	NTPCR	Acute Lymphoblastic Leukemia			0.689	16908_5_OMG_OMGP	Acute Lymphoblastic Leukemia
0.667	NUCB1	Acute Lymphoblastic Leukemia			0.929	16913_8_RNASET2_RNT2	Acute Lymphoblastic Leukemia
0.22	NUDT6	Acute Lymphoblastic Leukemia			1	16914_104_CD14_sCD14	Acute Lymphoblastic Leukemia
0.468	NUFIP2	Acute Lymphoblastic Leukemia			0.33	16915_153_SEMA4A_SEM4A	Acute Lymphoblastic Leukemia
0.242	NUP85	Acute Lymphoblastic Leukemia			0.578	16916_19_SLITRK6_SLIK6	Acute Lymphoblastic Leukemia
0.328	NUP88	Acute Lymphoblastic Leukemia			0.973	16918_198_TLR3_TLR3	Acute Lymphoblastic Leukemia
0.528	NUPL2	Acute Lymphoblastic Leukemia			0.956	16922_53_PLXNB3_PLXB3	Acute Lymphoblastic Leukemia
0.176	OAS1	Acute Lymphoblastic Leukemia			0.339	16926_44_ALPL_Alkaline_phosphatase__liver	Acute Lymphoblastic Leukemia
0.006	OASL	Acute Lymphoblastic Leukemia			0.84	17137_160_HBB_Beta_globin	Acute Lymphoblastic Leukemia
0.433	OBSCN	Acute Lymphoblastic Leukemia			0.533	17138_8_GSTA1_GST_A1_1	Acute Lymphoblastic Leukemia
0.278	OCEL1	Acute Lymphoblastic Leukemia			0.907	17140_57_PDGFD_PDGFD	Acute Lymphoblastic Leukemia
0.948	ODC1	Acute Lymphoblastic Leukemia			0.372	17148_7_BLVRB_BLVRB	Acute Lymphoblastic Leukemia
0.892	ODF3B	Acute Lymphoblastic Leukemia			0.471	17152_10_KIR2DS4_KI2S4	Acute Lymphoblastic Leukemia
0.82	OPRL1	Acute Lymphoblastic Leukemia			0.628	17153_46_KIR2DL3_KI2L3	Acute Lymphoblastic Leukemia
0.781	OR13A1	Acute Lymphoblastic Leukemia			0.204	17154_2_PTGES3_TEBP	Acute Lymphoblastic Leukemia
0.444	OR2A9P	Acute Lymphoblastic Leukemia			0.091	17155_1_VPS28_VPS28_protein_homolog	Acute Lymphoblastic Leukemia
0.674	OR7D2	Acute Lymphoblastic Leukemia			0.672	17156_72_DCLK1_DCAK1	Acute Lymphoblastic Leukemia
0.474	OR7E14P	Acute Lymphoblastic Leukemia			0.736	17170_15_CALCB_CALCB	Acute Lymphoblastic Leukemia
0.917	OSBPL3	Acute Lymphoblastic Leukemia			0.464	17175_5_MAP2K6_MP2K6	Acute Lymphoblastic Leukemia
0.672	OSBPL8	Acute Lymphoblastic Leukemia			0.632	17200_50_KIR2DL1_KI2L1	Acute Lymphoblastic Leukemia
0.4	OSGIN1	Acute Lymphoblastic Leukemia			0.356	17209_27_SULT2B1_ST2B1	Acute Lymphoblastic Leukemia
0.293	OTOF	Acute Lymphoblastic Leukemia			0.098	17210_2_TCL1A_TCL1A	Acute Lymphoblastic Leukemia
0.201	P2RX4	Acute Lymphoblastic Leukemia			0.489	17224_12_OGN_MIME	Acute Lymphoblastic Leukemia
0.774	P2RX7	Acute Lymphoblastic Leukemia			0.261	17231_1_LCP1_L_plastin	Acute Lymphoblastic Leukemia
0.826	PADI4	Acute Lymphoblastic Leukemia			0.68	17320_19_AASDHPPT_ADPPT	Acute Lymphoblastic Leukemia
0.33	PALD1	Acute Lymphoblastic Leukemia			0.522	17325_10_GUK1_KGUA	Acute Lymphoblastic Leukemia
0.632	PAM16	Acute Lymphoblastic Leukemia			0.98	17327_3_CNPY3_CNPY3	Acute Lymphoblastic Leukemia
0.425	PAN3-AS1	Acute Lymphoblastic Leukemia			0.91	17329_2_BDH2_BDH2	Acute Lymphoblastic Leukemia
0.778	PAN3	Acute Lymphoblastic Leukemia			0.62	17331_138_KREMEN1_KREM1	Acute Lymphoblastic Leukemia
0.708	PAPD4	Acute Lymphoblastic Leukemia			0.142	17335_18_VAMP2_VAMP2	Acute Lymphoblastic Leukemia
0.48	PARP16	Acute Lymphoblastic Leukemia			0.451	17341_89_ACAT2_THIC	Acute Lymphoblastic Leukemia
0.43	PASK	Acute Lymphoblastic Leukemia			0.522	17342_13_AGR3_AGR3	Acute Lymphoblastic Leukemia
0.862	PCCA	Acute Lymphoblastic Leukemia			0.738	17343_6_SNPH_SNPH	Acute Lymphoblastic Leukemia
0.016	PCED1B	Acute Lymphoblastic Leukemia			0.902	17344_23_STOML1_STML1	Acute Lymphoblastic Leukemia
0.725	PCGF2	Acute Lymphoblastic Leukemia			0.417	17346_61_FDCSP_FDSCP	Acute Lymphoblastic Leukemia
0.854	PCK2	Acute Lymphoblastic Leukemia			0.581	17350_13_CHMP2B_CHM2B	Acute Lymphoblastic Leukemia
0.641	PCMT1	Acute Lymphoblastic Leukemia			0.355	17366_6_DCUN1D1_DCNL1	Acute Lymphoblastic Leukemia
0.959	PCNX	Acute Lymphoblastic Leukemia			0.28	17367_5_STMN1_Stathmin	Acute Lymphoblastic Leukemia
0.42	PCNXL3	Acute Lymphoblastic Leukemia			0.807	17377_1_AKR1C3_Aldose_reductase_like_C3	Acute Lymphoblastic Leukemia
0.439	PDCD5	Acute Lymphoblastic Leukemia			0.52	17383_4_STARD5_STAR5	Acute Lymphoblastic Leukemia
0.631	PDGFB	Acute Lymphoblastic Leukemia			0.871	17391_10_RBM17_SPF45	Acute Lymphoblastic Leukemia
0.796	PDK4	Acute Lymphoblastic Leukemia			0.067	17393_13_ACADS_SCAD	Acute Lymphoblastic Leukemia
0.463	PDLIM1	Acute Lymphoblastic Leukemia			0.888	17396_23_ADH1A_ADH1A	Acute Lymphoblastic Leukemia
0.698	PELO	Acute Lymphoblastic Leukemia			0.109	17398_55_HMOX1_HO_1	Acute Lymphoblastic Leukemia
0.299	PET112	Acute Lymphoblastic Leukemia			0.339	17400_71_ACOT8_ACOT8	Acute Lymphoblastic Leukemia
0.29	PFKP	Acute Lymphoblastic Leukemia			0.653	17403_14_ACADSB_acyl_Coenzyme_A_dehydrogenase	Acute Lymphoblastic Leukemia
0.734	PGAP1	Acute Lymphoblastic Leukemia			0.928	17404_5_ARL5B_ARL5B	Acute Lymphoblastic Leukemia
0.539	PGK1P2	Acute Lymphoblastic Leukemia			0.218	17408_2_PMM1_PMM1	Acute Lymphoblastic Leukemia
0.597	PGLS	Acute Lymphoblastic Leukemia			0.856	17410_5_CETN3_CETN3	Acute Lymphoblastic Leukemia
0.632	PGLYRP1	Acute Lymphoblastic Leukemia			0.485	17432_25_AK4_KAD4	Acute Lymphoblastic Leukemia
0.412	PGLYRP2	Acute Lymphoblastic Leukemia			0.091	17435_43_ETFA_ETFA	Acute Lymphoblastic Leukemia
0.775	PGP	Acute Lymphoblastic Leukemia			0.63	17441_4_ALPI_Alkaline_phosphatase__intestine	Acute Lymphoblastic Leukemia
0.853	PHACTR4	Acute Lymphoblastic Leukemia			0.899	17447_52_SFRP4_SFRP4	Acute Lymphoblastic Leukemia
0.506	PHB	Acute Lymphoblastic Leukemia			0.485	17449_23_CD9_CD9	Acute Lymphoblastic Leukemia
0.941	PHF11	Acute Lymphoblastic Leukemia			0.675	17453_34_CP_Ceruloplasmin	Acute Lymphoblastic Leukemia
0.406	PHF14	Acute Lymphoblastic Leukemia			0.631	17454_15_EGFL6_EGFL6	Acute Lymphoblastic Leukemia
0.516	PHF2	Acute Lymphoblastic Leukemia			0.328	17455_42_FOLR1_FOLR1	Acute Lymphoblastic Leukemia
0.457	PHLDB3	Acute Lymphoblastic Leukemia			0.732	17456_53_GOLM1_GOLM1	Acute Lymphoblastic Leukemia
0.398	PHOSPHO2	Acute Lymphoblastic Leukemia			0.977	17460_51_MX1_Mx1	Acute Lymphoblastic Leukemia
0.759	PHPT1	Acute Lymphoblastic Leukemia			0.47	17467_1_DHRS9_DHRS9	Acute Lymphoblastic Leukemia
0.982	PIEZO1	Acute Lymphoblastic Leukemia			0.347	17468_1_SUFU_SUFU	Acute Lymphoblastic Leukemia
0.662	PIGL	Acute Lymphoblastic Leukemia			0.205	17475_18_PBK_TOPK	Acute Lymphoblastic Leukemia
0.336	PIGZ	Acute Lymphoblastic Leukemia			0.959	17490_4_SH3BGRL3_SH3BGRL3_like_protein	Acute Lymphoblastic Leukemia
0.953	PIK3IP1	Acute Lymphoblastic Leukemia			0.561	17495_141_SIRT3_SIR3	Acute Lymphoblastic Leukemia
0.657	PINK1-AS	Acute Lymphoblastic Leukemia			0.219	17505_125_NAALADL1_NALDL	Acute Lymphoblastic Leukemia
0.927	PINK1	Acute Lymphoblastic Leukemia			0.703	17510_7_SRP14_SRP14	Acute Lymphoblastic Leukemia
0.998	PISD	Acute Lymphoblastic Leukemia			0.641	17511_10_RPP30_RPP30	Acute Lymphoblastic Leukemia
0.282	PITPNC1	Acute Lymphoblastic Leukemia			0.404	17513_11_ANXA11_ANX11	Acute Lymphoblastic Leukemia
0.094	PITRM1	Acute Lymphoblastic Leukemia			0.642	17515_6_HSPA13_STCH	Acute Lymphoblastic Leukemia
0.701	PKD1P6	Acute Lymphoblastic Leukemia			0.536	17516_7_RAB3A_Rab3A	Acute Lymphoblastic Leukemia
0.945	PKHD1L1	Acute Lymphoblastic Leukemia			0.223	17671_58_ING4_ING4	Acute Lymphoblastic Leukemia
0.973	PLA2G4B	Acute Lymphoblastic Leukemia			0.494	17673_34_CA5B_Carbonic_Anhydrase_VB	Acute Lymphoblastic Leukemia
0.736	PLD6	Acute Lymphoblastic Leukemia			0.924	17677_47_CD160_BY55	Acute Lymphoblastic Leukemia
0.591	PLEC	Acute Lymphoblastic Leukemia			0.685	17680_12_EPHB1_EPHB1	Acute Lymphoblastic Leukemia
0.667	PLEKHA3	Acute Lymphoblastic Leukemia			0.383	17682_1_CD46_CD46	Acute Lymphoblastic Leukemia
0.594	PLEKHB1	Acute Lymphoblastic Leukemia			0.117	17685_9_APOA4_Apo_A_IV	Acute Lymphoblastic Leukemia
0.668	PLEKHG5	Acute Lymphoblastic Leukemia			0.5	17691_1_TPP1_TPP1	Acute Lymphoblastic Leukemia
0.957	PLGLB1	Acute Lymphoblastic Leukemia			0.431	17692_2_BTN3A3_BT3A3	Acute Lymphoblastic Leukemia
0.482	PLLP	Acute Lymphoblastic Leukemia			0.586	17702_53_UGT1A1_UGT_1A1	Acute Lymphoblastic Leukemia
0.366	PLOD1	Acute Lymphoblastic Leukemia			0.373	17710_40_TPD52L1_TPD53	Acute Lymphoblastic Leukemia
0.152	PLXDC1	Acute Lymphoblastic Leukemia			0.443	17725_37_USH1C_USH1C	Acute Lymphoblastic Leukemia
0.611	PNPLA7	Acute Lymphoblastic Leukemia			0.624	17726_3_SAR1A_SAR1A	Acute Lymphoblastic Leukemia
0.898	POC5	Acute Lymphoblastic Leukemia			0.575	17737_7_IVD_IVD	Acute Lymphoblastic Leukemia
0.774	PODXL	Acute Lymphoblastic Leukemia			0.685	17742_2_RRAS_RRAS	Acute Lymphoblastic Leukemia
0.456	POGZ	Acute Lymphoblastic Leukemia			0.37	17743_14_UBE2A_UBE2A	Acute Lymphoblastic Leukemia
0.67	POLL	Acute Lymphoblastic Leukemia			0.283	17744_31_RAB11A_RB11A	Acute Lymphoblastic Leukemia
0.669	POLR1D	Acute Lymphoblastic Leukemia			0.179	17747_45_TRAF1_TRAF1	Acute Lymphoblastic Leukemia
0.806	POLR2B	Acute Lymphoblastic Leukemia			0.233	17748_21_TP53I3_QORX	Acute Lymphoblastic Leukemia
0.356	POLR2J	Acute Lymphoblastic Leukemia			0.919	17750_8_RRM2_RIR2	Acute Lymphoblastic Leukemia
0.401	POM121B	Acute Lymphoblastic Leukemia			0.796	17751_68_CRYBB1_CRBB1	Acute Lymphoblastic Leukemia
0.091	POMC	Acute Lymphoblastic Leukemia			0.742	17752_24_ARG2_Arginase	Acute Lymphoblastic Leukemia
0.929	POPDC2	Acute Lymphoblastic Leukemia			0.85	17755_5_UGDH_UGDH	Acute Lymphoblastic Leukemia
0.359	PP13439	Acute Lymphoblastic Leukemia			0.137	17764_108_RHOC_RHOC	Acute Lymphoblastic Leukemia
0.758	PPA1	Acute Lymphoblastic Leukemia			0.669	17765_3_SNUPN_SPN1	Acute Lymphoblastic Leukemia
0.721	PPARG	Acute Lymphoblastic Leukemia			0.221	17766_5_NCF1_NCF_1	Acute Lymphoblastic Leukemia
0.316	PPIE	Acute Lymphoblastic Leukemia			0.129	17771_35_CRCP_RPC9	Acute Lymphoblastic Leukemia
0.804	PPIEL	Acute Lymphoblastic Leukemia			0.234	17772_7_UBD_UBD	Acute Lymphoblastic Leukemia
0.965	PPM1F	Acute Lymphoblastic Leukemia			0.637	17773_26_NAPG_SNAG	Acute Lymphoblastic Leukemia
0.91	PPM1G	Acute Lymphoblastic Leukemia			0.39	17777_31_SDSL_SDSL	Acute Lymphoblastic Leukemia
0.833	PPM1K	Acute Lymphoblastic Leukemia			0.722	17781_191_MAP1LC3A_MLP3A	Acute Lymphoblastic Leukemia
0.317	PPM1L	Acute Lymphoblastic Leukemia			0.686	17782_23_ACAA1_THIK	Acute Lymphoblastic Leukemia
0.815	PPOX	Acute Lymphoblastic Leukemia			0.375	17783_9_MMAB_MMAB	Acute Lymphoblastic Leukemia
0.282	PPP1R13B	Acute Lymphoblastic Leukemia			0.154	17792_158_ALDH5A1_SSDH	Acute Lymphoblastic Leukemia
0.659	PPP1R14A	Acute Lymphoblastic Leukemia			0.809	17794_6_PMM2_Phosphomannomutase_2	Acute Lymphoblastic Leukemia
0.549	PPP2R1B	Acute Lymphoblastic Leukemia			0.101	17796_15_IMPA1_IMPA1	Acute Lymphoblastic Leukemia
0.455	PPP2R2B	Acute Lymphoblastic Leukemia			0.36	17799_9_PGLS_6PGL	Acute Lymphoblastic Leukemia
0.7	PPP6R1	Acute Lymphoblastic Leukemia			0.402	17804_102_PNPO_PNPO	Acute Lymphoblastic Leukemia
0.595	PRC1	Acute Lymphoblastic Leukemia			0.581	17806_6_SDCBP_Syntenin_1	Acute Lymphoblastic Leukemia
0.338	PRDX3	Acute Lymphoblastic Leukemia			0.538	17811_78_SULT1C2_ST1C2	Acute Lymphoblastic Leukemia
0.224	PRELID1	Acute Lymphoblastic Leukemia			0.396	17817_22_DDIT4_DDIT4	Acute Lymphoblastic Leukemia
0.773	PRG4	Acute Lymphoblastic Leukemia			0.102	17820_170_MLF1_MLF1	Acute Lymphoblastic Leukemia
0.985	PRICKLE1	Acute Lymphoblastic Leukemia			0.51	17821_20_NMT2_NMT2	Acute Lymphoblastic Leukemia
0.742	PRKAB1	Acute Lymphoblastic Leukemia			0.493	17822_57_RERG_RERG	Acute Lymphoblastic Leukemia
0.959	PRKAB2	Acute Lymphoblastic Leukemia			0.764	17826_341_EEF1D_EF1D	Acute Lymphoblastic Leukemia
0.979	PRKCD	Acute Lymphoblastic Leukemia			0.173	17828_3_S100A14_S100A14	Acute Lymphoblastic Leukemia
0.912	PRKG1	Acute Lymphoblastic Leukemia			0.477	17836_17_S100A16_S100A16	Acute Lymphoblastic Leukemia
0.151	PRLR	Acute Lymphoblastic Leukemia			0.256	17837_5_CLIC2_CLIC2	Acute Lymphoblastic Leukemia
0.201	PRMT6	Acute Lymphoblastic Leukemia			0.685	17849_6_DRG1_DRG1	Acute Lymphoblastic Leukemia
0.894	PROC	Acute Lymphoblastic Leukemia			0.585	17850_42_KLF4_KLF4	Acute Lymphoblastic Leukemia
0.72	PROSER2	Acute Lymphoblastic Leukemia			0.132	18166_4_RHOB_RHOB	Acute Lymphoblastic Leukemia
0.702	PRPS1P2	Acute Lymphoblastic Leukemia			0.317	18172_71_ASF1A_ASF1A	Acute Lymphoblastic Leukemia
0.745	PRPSAP2	Acute Lymphoblastic Leukemia			0.866	18173_11_AKR7A3_ARK73	Acute Lymphoblastic Leukemia
0.3	PRR24	Acute Lymphoblastic Leukemia			0.276	18177_49_NAE1_ULA1	Acute Lymphoblastic Leukemia
0.774	PRR4	Acute Lymphoblastic Leukemia			0.374	18182_24_PCK1_PCKGC	Acute Lymphoblastic Leukemia
0.434	PSMD9	Acute Lymphoblastic Leukemia			0.769	18183_3_LDLRAP1_ARH	Acute Lymphoblastic Leukemia
0.802	PSPHP1	Acute Lymphoblastic Leukemia			0.358	18185_118_ALDOB_ALDOB	Acute Lymphoblastic Leukemia
0.788	PSTK	Acute Lymphoblastic Leukemia			0.468	18187_16_ASPA_ACY2	Acute Lymphoblastic Leukemia
0.543	PSTPIP1	Acute Lymphoblastic Leukemia			0.728	18188_12_GATM_GATM	Acute Lymphoblastic Leukemia
0.46	PTBP3	Acute Lymphoblastic Leukemia			0.202	18190_15_CARD18_ICBR	Acute Lymphoblastic Leukemia
0.753	PTCH1	Acute Lymphoblastic Leukemia			0.512	18194_18_FABP9_FABP9	Acute Lymphoblastic Leukemia
0.861	PTDSS2	Acute Lymphoblastic Leukemia			0.322	18197_97_CKMT2_KCRS	Acute Lymphoblastic Leukemia
0.456	PTER	Acute Lymphoblastic Leukemia			0.384	18198_51_HBQ1_HBAT	Acute Lymphoblastic Leukemia
0.796	PTGDS	Acute Lymphoblastic Leukemia			0.094	18202_22_CD37_CD37	Acute Lymphoblastic Leukemia
0.599	PTP4A1	Acute Lymphoblastic Leukemia			0.027	18205_123_MAGEA6_MAGE_6	Acute Lymphoblastic Leukemia
0.988	PTPN12	Acute Lymphoblastic Leukemia			0.872	18206_18_ADH6_ADH6	Acute Lymphoblastic Leukemia
0.585	PTPRE	Acute Lymphoblastic Leukemia			0.262	18208_3_CCNB2_CCNB2	Acute Lymphoblastic Leukemia
0.989	PVT1	Acute Lymphoblastic Leukemia			0.359	18210_12_SPIN1_SPIN1	Acute Lymphoblastic Leukemia
0.117	PZP	Acute Lymphoblastic Leukemia			0.091	18213_30_UBE2F_UBE2F	Acute Lymphoblastic Leukemia
0.833	QPCT	Acute Lymphoblastic Leukemia			0.784	18215_5_THG1L_THG1	Acute Lymphoblastic Leukemia
0.891	QRICH1	Acute Lymphoblastic Leukemia			0.972	18216_22_IL11RA_IL_11_RA	Acute Lymphoblastic Leukemia
0.629	RAB12	Acute Lymphoblastic Leukemia			0.994	18218_48_CNRIP1_CB032	Acute Lymphoblastic Leukemia
0.641	RAB32	Acute Lymphoblastic Leukemia			0.382	18225_13_HEBP1_HEBP1	Acute Lymphoblastic Leukemia
0.681	RAB40B	Acute Lymphoblastic Leukemia			0.183	18231_147_PRND_PRND	Acute Lymphoblastic Leukemia
0.895	RAB44	Acute Lymphoblastic Leukemia			0.778	18235_16_PGP_PGP	Acute Lymphoblastic Leukemia
0.996	RAB4B	Acute Lymphoblastic Leukemia			0.975	18240_6_OMP_OMP	Acute Lymphoblastic Leukemia
0.946	RAB6A	Acute Lymphoblastic Leukemia			0.623	18241_18_CPOX_HEM6	Acute Lymphoblastic Leukemia
0.439	RAB8A	Acute Lymphoblastic Leukemia			0.369	18255_6_CYB5R1_NB5R1	Acute Lymphoblastic Leukemia
0.107	RABEP1	Acute Lymphoblastic Leukemia			0.629	18259_15_MEOX2_MEOX2	Acute Lymphoblastic Leukemia
1	RABEPK	Acute Lymphoblastic Leukemia			0.186	18270_10_TAF10_TAF10	Acute Lymphoblastic Leukemia
0.136	RAMP3	Acute Lymphoblastic Leukemia			0.5	18271_43_OXSM_OXSM	Acute Lymphoblastic Leukemia
0.855	RAP1GAP2	Acute Lymphoblastic Leukemia			0.368	18275_5_CRIP1_CRIP1	Acute Lymphoblastic Leukemia
0.44	RAP1GDS1	Acute Lymphoblastic Leukemia			0.57	18277_28_TRIAP1_TRIA1	Acute Lymphoblastic Leukemia
0.955	RAPGEF1	Acute Lymphoblastic Leukemia			0.471	18282_1_GNG11_GBG11	Acute Lymphoblastic Leukemia
0.41	RAPGEF3	Acute Lymphoblastic Leukemia			0.551	18285_6_SVIP_SVIP	Acute Lymphoblastic Leukemia
0.421	RARS2	Acute Lymphoblastic Leukemia			0.406	18289_16_CCL15_MIP_5	Acute Lymphoblastic Leukemia
0.543	RASA4B	Acute Lymphoblastic Leukemia			0.413	18301_10_NAIF1_NAIF1	Acute Lymphoblastic Leukemia
0.945	RAVER2	Acute Lymphoblastic Leukemia			0.292	18302_204_ZWILCH_ZWILC	Acute Lymphoblastic Leukemia
0.675	RB1	Acute Lymphoblastic Leukemia			0.215	18306_1_PALM_PALM	Acute Lymphoblastic Leukemia
0.473	RBL2	Acute Lymphoblastic Leukemia			0.305	18307_71_PPA2_PPase_2	Acute Lymphoblastic Leukemia
0.971	RBM39	Acute Lymphoblastic Leukemia			0.218	18308_30_STXBP6_STXB6	Acute Lymphoblastic Leukemia
0.957	RCL1	Acute Lymphoblastic Leukemia			0.397	18311_44_DCTN6_DCTN6	Acute Lymphoblastic Leukemia
0.953	RCN1	Acute Lymphoblastic Leukemia			0.076	18312_68_NDRG3_NDRG3	Acute Lymphoblastic Leukemia
0.962	RCOR1	Acute Lymphoblastic Leukemia			0.382	18313_4_ASRGL1_Asparaginase_like_protein_1	Acute Lymphoblastic Leukemia
0.181	RCVRN	Acute Lymphoblastic Leukemia			0.934	18315_38_RTP4_RTP4	Acute Lymphoblastic Leukemia
0.013	RDH13	Acute Lymphoblastic Leukemia			0.411	18321_38_MTHFD2_MTDC	Acute Lymphoblastic Leukemia
0.703	RECQL	Acute Lymphoblastic Leukemia			0.423	18326_50_MAGEA8_MAGA8	Acute Lymphoblastic Leukemia
0.216	REEP1	Acute Lymphoblastic Leukemia			0.528	18327_6_SNX5_SNX5	Acute Lymphoblastic Leukemia
0.517	RELT	Acute Lymphoblastic Leukemia			0.505	18328_36_PYCR2_P5CR2	Acute Lymphoblastic Leukemia
0.863	REPS1	Acute Lymphoblastic Leukemia			0.501	18330_7_PGM2_PGM2	Acute Lymphoblastic Leukemia
0.823	RETSAT	Acute Lymphoblastic Leukemia			0.491	18332_17_CPLX1_CPLX1	Acute Lymphoblastic Leukemia
0.157	RFWD3	Acute Lymphoblastic Leukemia			0.909	18338_26_IDH1_IDH	Acute Lymphoblastic Leukemia
0.543	RGL1	Acute Lymphoblastic Leukemia			0.933	18340_2_PSMB4_Proteasome_beta_chain	Acute Lymphoblastic Leukemia
0.84	RHD	Acute Lymphoblastic Leukemia			0.926	18342_2_PSAT1_SERC	Acute Lymphoblastic Leukemia
0.616	RHOH	Acute Lymphoblastic Leukemia			0.779	18343_10_DECR2_DECR2	Acute Lymphoblastic Leukemia
0.931	RHOQ	Acute Lymphoblastic Leukemia			0.282	18376_19_MYL3_Myosin_light_chain_1	Acute Lymphoblastic Leukemia
0.815	RHPN1	Acute Lymphoblastic Leukemia			0.075	18380_78_ALB_Albumin	Acute Lymphoblastic Leukemia
0.974	RIPK1	Acute Lymphoblastic Leukemia			0.29	18381_16_ALDH2_ALDH_E2	Acute Lymphoblastic Leukemia
0.849	RMND1	Acute Lymphoblastic Leukemia			0.316	18382_109_COMT_Catechol_O_methyltransferase	Acute Lymphoblastic Leukemia
0.039	RNASE2	Acute Lymphoblastic Leukemia			0.361	18385_4_PSMD10_PSD10	Acute Lymphoblastic Leukemia
0.226	RNASE3	Acute Lymphoblastic Leukemia			0.986	18392_19_MAT2B_MAT2B	Acute Lymphoblastic Leukemia
0.665	RNF130	Acute Lymphoblastic Leukemia			0.48	18395_5_ADPRH_ADPRH	Acute Lymphoblastic Leukemia
0.731	RNF144A	Acute Lymphoblastic Leukemia			0.388	18397_5_AKR1C4_AK1C4	Acute Lymphoblastic Leukemia
0.704	RNF182	Acute Lymphoblastic Leukemia			0.448	18399_1_AKAP7_AKA7A	Acute Lymphoblastic Leukemia
0.611	RNF185	Acute Lymphoblastic Leukemia			0.941	18401_18_ALKBH3_ALKB3	Acute Lymphoblastic Leukemia
0.783	RNF219	Acute Lymphoblastic Leukemia			0.348	18408_26_ARF4_ARF4	Acute Lymphoblastic Leukemia
0.743	RNF24	Acute Lymphoblastic Leukemia			0.158	18409_61_ARF5_ARF5	Acute Lymphoblastic Leukemia
0.159	RNF40	Acute Lymphoblastic Leukemia			0.352	18432_32_RALB_RALB	Acute Lymphoblastic Leukemia
0.487	RP1-197B17.3	Acute Lymphoblastic Leukemia			0.853	18434_141_TBPL1_TBPL1	Acute Lymphoblastic Leukemia
0.899	RP1-28O10.1	Acute Lymphoblastic Leukemia			0.214	18449_33_PPIG_PPIG	Acute Lymphoblastic Leukemia
0.693	RP1-34L19.1	Acute Lymphoblastic Leukemia			0.719	18458_4_PTGES2_PGES2	Acute Lymphoblastic Leukemia
0.683	RP1-97J1.2	Acute Lymphoblastic Leukemia			0.078	18819_21_PPIC_PPIC	Acute Lymphoblastic Leukemia
0.473	RP11-104L21.2	Acute Lymphoblastic Leukemia			0.551	18830_1_ITLN1_Omentin	Acute Lymphoblastic Leukemia
0.351	RP11-1070N10.3	Acute Lymphoblastic Leukemia			0.544	18831_6_LRIG1_LRIG1	Acute Lymphoblastic Leukemia
0.93	RP11-107F6.3	Acute Lymphoblastic Leukemia			0.189	18832_65_SAA2_SAA2	Acute Lymphoblastic Leukemia
0.709	RP11-108K14.4	Acute Lymphoblastic Leukemia			0.471	18837_9_SGTB_SGTB	Acute Lymphoblastic Leukemia
0.631	RP11-111H3.1	Acute Lymphoblastic Leukemia			0.383	18839_24_TG_Thyroglobulin	Acute Lymphoblastic Leukemia
0.359	RP11-114H24.6	Acute Lymphoblastic Leukemia			0.146	18840_205_SH2D1B_SH21B	Acute Lymphoblastic Leukemia
0.557	RP11-115C21.2	Acute Lymphoblastic Leukemia			0.141	18841_1_SERPINB13_SPB13	Acute Lymphoblastic Leukemia
0.731	RP11-115L11.1	Acute Lymphoblastic Leukemia			0.217	18842_24_UBE2D2_UB2D2	Acute Lymphoblastic Leukemia
0.887	RP11-120K18.3	Acute Lymphoblastic Leukemia			0.79	18864_7_PRSS3_TRY3	Acute Lymphoblastic Leukemia
0.603	RP11-1365D11.1	Acute Lymphoblastic Leukemia			0.318	18866_8_PPP3R2_CANB2	Acute Lymphoblastic Leukemia
0.2	RP11-1398P2.1	Acute Lymphoblastic Leukemia			0.271	18870_1_CD3E_CD3E	Acute Lymphoblastic Leukemia
0.826	RP11-140A10.3	Acute Lymphoblastic Leukemia			0.93	18871_24_AIF1L_AIF1L	Acute Lymphoblastic Leukemia
0.131	RP11-142C4.6	Acute Lymphoblastic Leukemia			0.906	18873_8_CEACAM8_CEAM8	Acute Lymphoblastic Leukemia
0.246	RP11-147L13.8	Acute Lymphoblastic Leukemia			0.141	18875_125_COL2A1_Chondrocalcin	Acute Lymphoblastic Leukemia
0.293	RP11-153A23.6	Acute Lymphoblastic Leukemia			0.486	18876_77_CHST4_CHST4	Acute Lymphoblastic Leukemia
0.268	RP11-160H22.5	Acute Lymphoblastic Leukemia			0.91	18878_15_GREM1_GREM1	Acute Lymphoblastic Leukemia
0.782	RP11-165J3.6	Acute Lymphoblastic Leukemia			0.664	18880_81_COL3A1_Collagen_Type_III	Acute Lymphoblastic Leukemia
0.38	RP11-16E12.2	Acute Lymphoblastic Leukemia			0.937	18882_7_CLSTN2_CSTN2	Acute Lymphoblastic Leukemia
0.122	RP11-18H21.1	Acute Lymphoblastic Leukemia			0.853	18884_22_DNAJB4_DNJB4	Acute Lymphoblastic Leukemia
0.249	RP11-195E2.1	Acute Lymphoblastic Leukemia			0.493	18888_37_FABP12_FBP12	Acute Lymphoblastic Leukemia
0.487	RP11-195E2.4	Acute Lymphoblastic Leukemia			0.021	18890_227_FGB_Fibrinogen_B	Acute Lymphoblastic Leukemia
0.236	RP11-212I21.2	Acute Lymphoblastic Leukemia			0.844	18891_98_GBP2_GBP2	Acute Lymphoblastic Leukemia
0.596	RP11-213G21.1	Acute Lymphoblastic Leukemia			0.921	18895_54_GSTM4_GSTM4	Acute Lymphoblastic Leukemia
0.892	RP11-229P13.19	Acute Lymphoblastic Leukemia			0.563	18896_23_HS6ST3_H6ST3	Acute Lymphoblastic Leukemia
0.708	RP11-248C1.2	Acute Lymphoblastic Leukemia			0.96	18897_31_HDAC2_HDAC2	Acute Lymphoblastic Leukemia
1	RP11-24F11.2	Acute Lymphoblastic Leukemia			0.556	18901_26_HSPA1B_HS71B	Acute Lymphoblastic Leukemia
0.936	RP11-253D19.1	Acute Lymphoblastic Leukemia			0.85	18916_25_ITPA_Inosine_triphosphatase	Acute Lymphoblastic Leukemia
0.808	RP11-274B21.1	Acute Lymphoblastic Leukemia			0.783	18917_53_AMY2A_Pancreatic_alpha_amylase	Acute Lymphoblastic Leukemia
0.43	RP11-274B21.2	Acute Lymphoblastic Leukemia			0.616	18918_86_PDE4A_PDE4A	Acute Lymphoblastic Leukemia
0.191	RP11-274B21.3	Acute Lymphoblastic Leukemia			0.71	18922_27_CD68_CD68	Acute Lymphoblastic Leukemia
0.123	RP11-274B21.4	Acute Lymphoblastic Leukemia			0.453	18925_24_PSMA5_Proteasome_subunit_alpha_type_5	Acute Lymphoblastic Leukemia
0.449	RP11-290F20.1	Acute Lymphoblastic Leukemia			0.104	18927_14_RAET1G_RET1G	Acute Lymphoblastic Leukemia
0.991	RP11-290F20.3	Acute Lymphoblastic Leukemia			0.717	18930_28_SLIT2_SLIT2	Acute Lymphoblastic Leukemia
0.808	RP11-295P9.3	Acute Lymphoblastic Leukemia			0.076	18931_40_SLIT3_SLIT3	Acute Lymphoblastic Leukemia
0.948	RP11-297N6.4	Acute Lymphoblastic Leukemia			0.623	18933_4_TGM4_TGM4	Acute Lymphoblastic Leukemia
0.397	RP11-318C24.2	Acute Lymphoblastic Leukemia			0.021	18934_50_TGM2_Tissue_transglutaminase	Acute Lymphoblastic Leukemia
0.682	RP11-326C3.12	Acute Lymphoblastic Leukemia			0.83	18935_14_TLR5_TLR5	Acute Lymphoblastic Leukemia
0.639	RP11-326C3.2	Acute Lymphoblastic Leukemia			0.604	18938_3_VLDLR_VLDLR	Acute Lymphoblastic Leukemia
0.96	RP11-327F22.2	Acute Lymphoblastic Leukemia			0.891	18942_11_PSMB9_PSB9	Acute Lymphoblastic Leukemia
0.444	RP11-327F22.6	Acute Lymphoblastic Leukemia			0.333	18943_4_PTGR2_PTGR2	Acute Lymphoblastic Leukemia
0.886	RP11-334C17.5	Acute Lymphoblastic Leukemia			0.422	18947_3_LRRC3B_LRC3B	Acute Lymphoblastic Leukemia
0.72	RP11-340F14.5	Acute Lymphoblastic Leukemia			0.446	19109_32_TCEAL8_TCAL8	Acute Lymphoblastic Leukemia
0.8	RP11-356I2.2	Acute Lymphoblastic Leukemia			0.867	19110_6_MEMO1_MEMO1	Acute Lymphoblastic Leukemia
0.936	RP11-367J7.2	Acute Lymphoblastic Leukemia			0.69	19113_66_SH3BGRL2_SH3L2	Acute Lymphoblastic Leukemia
0.514	RP11-37B2.1	Acute Lymphoblastic Leukemia			0.501	19123_6_NFKBID_IKBD	Acute Lymphoblastic Leukemia
0.571	RP11-390P2.4	Acute Lymphoblastic Leukemia			0.84	19124_9_UBLCP1_UBCP1	Acute Lymphoblastic Leukemia
0.67	RP11-392A22.2	Acute Lymphoblastic Leukemia			0.442	19127_1_HSPB6_HSPB6	Acute Lymphoblastic Leukemia
0.332	RP11-424I19.2	Acute Lymphoblastic Leukemia			0.018	19129_15_MTHFSD_MTHFSD	Acute Lymphoblastic Leukemia
0.343	RP11-439E19.8	Acute Lymphoblastic Leukemia			0.242	19130_81_SERPINB8_SPB8	Acute Lymphoblastic Leukemia
0.931	RP11-439E19.9	Acute Lymphoblastic Leukemia			0.505	19131_184_TIAL1_TIAR	Acute Lymphoblastic Leukemia
0.156	RP11-445H22.3	Acute Lymphoblastic Leukemia			0.076	19136_22_ALDH6A1_MMSA	Acute Lymphoblastic Leukemia
0.713	RP11-452D12.1	Acute Lymphoblastic Leukemia			0.47	19141_22_DAP_DAP1	Acute Lymphoblastic Leukemia
0.664	RP11-458F8.1	Acute Lymphoblastic Leukemia			0.384	19143_38_CYB5R2_NB5R2	Acute Lymphoblastic Leukemia
0.766	RP11-459O1.2	Acute Lymphoblastic Leukemia			0.456	19145_4_MREG_MREG	Acute Lymphoblastic Leukemia
0.906	RP11-464D20.6	Acute Lymphoblastic Leukemia			0.825	19153_53_MPPED2_MPPD2	Acute Lymphoblastic Leukemia
0.585	RP11-465B22.3	Acute Lymphoblastic Leukemia			0.532	19154_41_SERPINE2_Protease_nexin_I	Acute Lymphoblastic Leukemia
0.364	RP11-472B18.2	Acute Lymphoblastic Leukemia			0.8	19161_1_USP15_UBP15	Acute Lymphoblastic Leukemia
0.797	RP11-539L10.2	Acute Lymphoblastic Leukemia			0.476	19166_15_RPS19_RS19	Acute Lymphoblastic Leukemia
0.324	RP11-540B6.2	Acute Lymphoblastic Leukemia			0.106	19170_25_POLE3_DPOE3	Acute Lymphoblastic Leukemia
0.464	RP11-548B3.3	Acute Lymphoblastic Leukemia			0.523	19173_5_ZFAND1_ZFAN1	Acute Lymphoblastic Leukemia
0.271	RP11-54A4.2	Acute Lymphoblastic Leukemia			0.536	19175_18_MARCKSL1_MARCKSL1	Acute Lymphoblastic Leukemia
0.919	RP11-54C4.1	Acute Lymphoblastic Leukemia			0.605	19180_38_GULP1_GULP1	Acute Lymphoblastic Leukemia
0.784	RP11-551L14.1	Acute Lymphoblastic Leukemia			0.798	19187_21_STAMBP_STABP	Acute Lymphoblastic Leukemia
0.747	RP11-555K12.1	Acute Lymphoblastic Leukemia			0.384	19193_18_VBP1_PFD3	Acute Lymphoblastic Leukemia
0.225	RP11-56F10.3	Acute Lymphoblastic Leukemia			0.372	19195_85_RPS5_RS5	Acute Lymphoblastic Leukemia
0.372	RP11-589N15.2	Acute Lymphoblastic Leukemia			0.343	19207_119_ADK_ADK	Acute Lymphoblastic Leukemia
0.986	RP11-58E21.4	Acute Lymphoblastic Leukemia			0.281	19208_8_ACVR2A_Activin_RIIA	Acute Lymphoblastic Leukemia
0.462	RP11-598F7.4	Acute Lymphoblastic Leukemia			0.364	19213_1_SPINK4_ISK4	Acute Lymphoblastic Leukemia
0.81	RP11-62H7.2	Acute Lymphoblastic Leukemia			0.445	19227_18_BATF_BATF	Acute Lymphoblastic Leukemia
0.77	RP11-63P12.6	Acute Lymphoblastic Leukemia			0.734	19229_92_HOMER1_HOME1	Acute Lymphoblastic Leukemia
0.777	RP11-645C24.5	Acute Lymphoblastic Leukemia			0.566	19237_17_DDT_D_dopachrome_decarboxylase	Acute Lymphoblastic Leukemia
0.35	RP11-664D1.1	Acute Lymphoblastic Leukemia			0.096	19239_5_ARF1_ARF1	Acute Lymphoblastic Leukemia
0.264	RP11-693J15.5	Acute Lymphoblastic Leukemia			0.481	19241_31_RBP5_RBP_III	Acute Lymphoblastic Leukemia
0.995	RP11-693N9.2	Acute Lymphoblastic Leukemia			0.41	19243_2_PFDN2_PFD2	Acute Lymphoblastic Leukemia
0.544	RP11-696N14.1	Acute Lymphoblastic Leukemia			0.55	19247_1_UBE2D1_UB2D1	Acute Lymphoblastic Leukemia
0.475	RP11-69E11.4	Acute Lymphoblastic Leukemia			0.363	19250_50_MYCBP_MYCBP	Acute Lymphoblastic Leukemia
0.589	RP11-6L6.2	Acute Lymphoblastic Leukemia			0.808	19251_56_SRGN_Platelet_proteoglycan	Acute Lymphoblastic Leukemia
0.678	RP11-704M14.1	Acute Lymphoblastic Leukemia			0.967	19254_125_GMPR_GMPR1	Acute Lymphoblastic Leukemia
0.625	RP11-705O3.1	Acute Lymphoblastic Leukemia			0.511	19261_12_SDCBP2_SDCB2	Acute Lymphoblastic Leukemia
0.651	RP11-707O23.5	Acute Lymphoblastic Leukemia			0.452	19266_35_G3BP1_G3BP1	Acute Lymphoblastic Leukemia
0.079	RP11-734I18.1	Acute Lymphoblastic Leukemia			0.715	19272_9_PEF1_PEF1	Acute Lymphoblastic Leukemia
0.515	RP11-73M18.7	Acute Lymphoblastic Leukemia			0.494	19273_3_GSR_Glutathione_reductase	Acute Lymphoblastic Leukemia
0.16	RP11-73M18.8	Acute Lymphoblastic Leukemia			0.845	19274_80_SNTA1_Alpha_1_syntrophin	Acute Lymphoblastic Leukemia
0.895	RP11-779O18.3	Acute Lymphoblastic Leukemia			0.714	19277_4_TSTD1_KAT	Acute Lymphoblastic Leukemia
0.912	RP11-77H9.2	Acute Lymphoblastic Leukemia			0.609	19279_42_RBP1_CRBP	Acute Lymphoblastic Leukemia
0.552	RP11-77P16.4	Acute Lymphoblastic Leukemia			0.414	19280_29_UBE2D3_UB2D3	Acute Lymphoblastic Leukemia
0.637	RP11-797H7.3	Acute Lymphoblastic Leukemia			0.942	19282_3_RAB13_RAB13	Acute Lymphoblastic Leukemia
0.575	RP11-798G7.5	Acute Lymphoblastic Leukemia			0.508	19289_29_UROD_DCUP	Acute Lymphoblastic Leukemia
0.95	RP11-809N8.4	Acute Lymphoblastic Leukemia			0.407	19293_6_VPS26A_VP26A	Acute Lymphoblastic Leukemia
0.41	RP11-84C10.2	Acute Lymphoblastic Leukemia			0.345	19294_26_CRIPT_CRIPT	Acute Lymphoblastic Leukemia
0.921	RP11-85K15.2	Acute Lymphoblastic Leukemia			0.439	19296_51_MYL7_MLRA	Acute Lymphoblastic Leukemia
0.075	RP11-883A18.3	Acute Lymphoblastic Leukemia			0.493	19303_64_PET117_PT117	Acute Lymphoblastic Leukemia
0.601	RP11-923I11.6	Acute Lymphoblastic Leukemia			0.142	19310_81_COPE_COPE	Acute Lymphoblastic Leukemia
0.547	RP11-923I11.7	Acute Lymphoblastic Leukemia			0.35	19316_2_HSCB_HSC20	Acute Lymphoblastic Leukemia
0.844	RP11-936I5.1	Acute Lymphoblastic Leukemia			0.809	19323_1_EBAG9_RCAS1	Acute Lymphoblastic Leukemia
0.495	RP11-95P2.1	Acute Lymphoblastic Leukemia			0.245	19327_31_HAT1_Hat1	Acute Lymphoblastic Leukemia
0.969	RP11-96H19.1	Acute Lymphoblastic Leukemia			0.393	19353_25_OSTM1_OSTM1	Acute Lymphoblastic Leukemia
0.151	RP13-25N22.1	Acute Lymphoblastic Leukemia			0.167	19356_20_TOM1L2_TM1L2	Acute Lymphoblastic Leukemia
0.612	RP13-753N3.1	Acute Lymphoblastic Leukemia			0.483	19360_22_LRRTM1_LRRT1	Acute Lymphoblastic Leukemia
0.456	RP13-98N21.2	Acute Lymphoblastic Leukemia			0.289	19361_78_MATN3_MATN3	Acute Lymphoblastic Leukemia
0.56	RP13-98N21.3	Acute Lymphoblastic Leukemia			0.442	19366_8_PEX26_PEX26	Acute Lymphoblastic Leukemia
0.304	RP3-407E4.4	Acute Lymphoblastic Leukemia			0.151	19370_30_HS3ST4_HS3S4	Acute Lymphoblastic Leukemia
0.949	RP3-449M8.6	Acute Lymphoblastic Leukemia			0.396	19372_7_MDGA2_MDGA2	Acute Lymphoblastic Leukemia
0.683	RP3-449M8.9	Acute Lymphoblastic Leukemia			0.474	19374_72_MTCP1_MTCP1	Acute Lymphoblastic Leukemia
0.441	RP3-455J7.4	Acute Lymphoblastic Leukemia			0.522	19377_14_OLFM2_NOE2	Acute Lymphoblastic Leukemia
0.617	RP3-460G2.2	Acute Lymphoblastic Leukemia			0.31	19392_6_DDAH1_DDAH1	Acute Lymphoblastic Leukemia
0.999	RP3-465N24.5	Acute Lymphoblastic Leukemia			0.858	19437_61_VEGFA_L_VEGF165	Acute Lymphoblastic Leukemia
0.459	RP4-576H24.2	Acute Lymphoblastic Leukemia			0.513	19446_1_GMPR2_GMPR2	Acute Lymphoblastic Leukemia
0.541	RP4-584D14.7	Acute Lymphoblastic Leukemia			0.847	19482_11_HDHD3_HDHD3	Acute Lymphoblastic Leukemia
0.987	RP4-647C14.3	Acute Lymphoblastic Leukemia			0.461	19488_1_PDCD6_PDCD6	Acute Lymphoblastic Leukemia
0.446	RP4-655C5.1	Acute Lymphoblastic Leukemia			0.209	19491_11_HSD17B8_DHB8	Acute Lymphoblastic Leukemia
0.544	RP4-659J6.2	Acute Lymphoblastic Leukemia			0.843	19492_5_KAAG1_KAAG1	Acute Lymphoblastic Leukemia
0.665	RP4-673D20.1	Acute Lymphoblastic Leukemia			0.291	19496_1_NPL_NPL	Acute Lymphoblastic Leukemia
0.797	RP4-673D20.3	Acute Lymphoblastic Leukemia			0.719	19504_22_DTYMK_KTHY	Acute Lymphoblastic Leukemia
0.888	RP4-673D20.4	Acute Lymphoblastic Leukemia			0.109	19506_6_GLYAT_GLYAT	Acute Lymphoblastic Leukemia
0.7	RP4-740C4.6	Acute Lymphoblastic Leukemia			0.403	19518_12_HK3_HXK3	Acute Lymphoblastic Leukemia
0.178	RP4-753D10.5	Acute Lymphoblastic Leukemia			0.333	19545_145_PARK7_Oxidized_PARK7	Acute Lymphoblastic Leukemia
0.5	RP4-798C17.5	Acute Lymphoblastic Leukemia			0.491	19553_14_STX1A_STX1a	Acute Lymphoblastic Leukemia
0.421	RP4-798C17.6	Acute Lymphoblastic Leukemia			0.889	19556_12_CR1_Complement_receptor_type_1	Acute Lymphoblastic Leukemia
0.326	RP4-800G7.2	Acute Lymphoblastic Leukemia			0.028	19557_3_KLB_KLOTB	Acute Lymphoblastic Leukemia
0.955	RP5-1021I20.1	Acute Lymphoblastic Leukemia			0.112	19558_10_LRP4_LRP4	Acute Lymphoblastic Leukemia
0.813	RP5-1074L1.1	Acute Lymphoblastic Leukemia			0.873	19560_23_PLXNA4_PLXA4	Acute Lymphoblastic Leukemia
0.62	RP5-1085F17.3	Acute Lymphoblastic Leukemia			0.99	19561_216_PLXND1_PLXD1	Acute Lymphoblastic Leukemia
0.128	RP5-1112D6.4	Acute Lymphoblastic Leukemia			0.71	19563_3_SEZ6L_SEZ6L	Acute Lymphoblastic Leukemia
0.328	RP5-821D11.7	Acute Lymphoblastic Leukemia			0.162	19567_1_EGFR_EGFRvIII	Acute Lymphoblastic Leukemia
0.152	RPA2	Acute Lymphoblastic Leukemia			0.738	19568_17_IL15_IL_15	Acute Lymphoblastic Leukemia
0.912	RPA3	Acute Lymphoblastic Leukemia			0.162	19572_10_CEBPG_CEBPG	Acute Lymphoblastic Leukemia
0.911	RPAP1	Acute Lymphoblastic Leukemia			0.371	19578_19_DOK2_DOK2	Acute Lymphoblastic Leukemia
0.606	RPAP3	Acute Lymphoblastic Leukemia			0.2	19579_5_DEFA1_HNP_1	Acute Lymphoblastic Leukemia
0.829	RPGRIP1	Acute Lymphoblastic Leukemia			0.496	19581_15_IGFBP5_IGFBP_5	Acute Lymphoblastic Leukemia
0.901	RPL12	Acute Lymphoblastic Leukemia			0.445	19587_12_KPNA1_IMA5	Acute Lymphoblastic Leukemia
0.755	RPL13A	Acute Lymphoblastic Leukemia			0.74	19590_46_SFTPD_SP_D	Acute Lymphoblastic Leukemia
0.687	RPL23AP53	Acute Lymphoblastic Leukemia			0.106	19596_18_BRF1_BRF_1	Acute Lymphoblastic Leukemia
0.24	RPL28	Acute Lymphoblastic Leukemia			0.908	19601_15_ASB9_ASB9	Acute Lymphoblastic Leukemia
0.636	RPL7AP64	Acute Lymphoblastic Leukemia			0.287	19606_28_IHH_ihh	Acute Lymphoblastic Leukemia
0.5	RPP25L	Acute Lymphoblastic Leukemia			0.64	19612_3_CD81_CD81	Acute Lymphoblastic Leukemia
0.054	RPRM	Acute Lymphoblastic Leukemia			0.351	19614_8_TCN1_Holo_TC_I	Acute Lymphoblastic Leukemia
0.015	RPS23	Acute Lymphoblastic Leukemia			0.474	19615_213_NT5C3A_5NT3	Acute Lymphoblastic Leukemia
0.244	RPS6KA5	Acute Lymphoblastic Leukemia			0.09	19616_100_EFHD1_EFHD1	Acute Lymphoblastic Leukemia
0.525	RRAGD	Acute Lymphoblastic Leukemia			0.402	19617_5_PTGR1_LTB4DH	Acute Lymphoblastic Leukemia
0.49	RREB1	Acute Lymphoblastic Leukemia			0.637	19620_16_DLG2_DLG2	Acute Lymphoblastic Leukemia
0.829	RRN3P1	Acute Lymphoblastic Leukemia			0.365	19622_7_INHBA_Activin_A	Acute Lymphoblastic Leukemia
0.341	RRNAD1	Acute Lymphoblastic Leukemia			0.95	19631_13_KNG1_Kininostatin	Acute Lymphoblastic Leukemia
0.832	RSAD1	Acute Lymphoblastic Leukemia			0.456	19635_69_FGL2_FGL2	Acute Lymphoblastic Leukemia
0.5	RSBN1	Acute Lymphoblastic Leukemia			0.778	19637_9_CRH_CRH	Acute Lymphoblastic Leukemia
0.935	RSBN1L	Acute Lymphoblastic Leukemia			0.143	19638_9_PDYN_Dynorphin_A__1_17_	Acute Lymphoblastic Leukemia
0.232	RYBP	Acute Lymphoblastic Leukemia			0.292	19639_53_IAPP_IAPP	Acute Lymphoblastic Leukemia
0.542	RYR1	Acute Lymphoblastic Leukemia			0.878	2190_55_F11_Coagulation_Factor_XI	Acute Lymphoblastic Leukemia
0.728	S100A1	Acute Lymphoblastic Leukemia			0.776	2201_17_COL18A1_Endostatin	Acute Lymphoblastic Leukemia
0.502	S100P	Acute Lymphoblastic Leukemia			0.908	2211_9_TIMP1_TIMP_1	Acute Lymphoblastic Leukemia
0.995	S100Z	Acute Lymphoblastic Leukemia			0.627	2212_69_PLAT_tPA	Acute Lymphoblastic Leukemia
0.716	SAMD3	Acute Lymphoblastic Leukemia			0.442	2278_61_TIMP2_TIMP_2	Acute Lymphoblastic Leukemia
0.424	SAMM50	Acute Lymphoblastic Leukemia			0.506	2333_72_TGFB1_TGF_b1	Acute Lymphoblastic Leukemia
0.655	SARM1	Acute Lymphoblastic Leukemia			0.809	2381_52_C5_C5	Acute Lymphoblastic Leukemia
0.579	SATB1	Acute Lymphoblastic Leukemia			0.048	2418_55_APOE_Apo_E	Acute Lymphoblastic Leukemia
0.523	SCCPDH	Acute Lymphoblastic Leukemia			0.086	2421_7_BDNF_BDNF	Acute Lymphoblastic Leukemia
0.522	SCFD2	Acute Lymphoblastic Leukemia			0.852	2436_49_CXCL16_CXCL16__soluble	Acute Lymphoblastic Leukemia
0.734	SCMH1	Acute Lymphoblastic Leukemia			0.438	2443_10_FGF8_FGF_8B	Acute Lymphoblastic Leukemia
0.892	SDHAF1	Acute Lymphoblastic Leukemia			0.839	2474_54_APCS_SAP	Acute Lymphoblastic Leukemia
0.96	SDHDP6	Acute Lymphoblastic Leukemia			0.449	2475_1_KIT_SCF_sR	Acute Lymphoblastic Leukemia
0.686	SEC22A	Acute Lymphoblastic Leukemia			0.783	2480_58_TIMP3_TIMP_3	Acute Lymphoblastic Leukemia
0.402	SEMA4A	Acute Lymphoblastic Leukemia			0.904	2515_14_GFRA2_GFRa_2	Acute Lymphoblastic Leukemia
0.392	SEPT11	Acute Lymphoblastic Leukemia			0.498	2516_57_CCL21_6Ckine	Acute Lymphoblastic Leukemia
0.231	SEPW1	Acute Lymphoblastic Leukemia			0.294	2558_51_POMC_b_Endorphin	Acute Lymphoblastic Leukemia
0.155	SERINC2	Acute Lymphoblastic Leukemia			0.813	2567_5_CFI_Factor_I	Acute Lymphoblastic Leukemia
0.647	SERINC5	Acute Lymphoblastic Leukemia			0.256	2571_12_IGFBP3_IGFBP_3	Acute Lymphoblastic Leukemia
0.883	SERPINB2	Acute Lymphoblastic Leukemia			0.85	2578_67_CCL2_MCP_1	Acute Lymphoblastic Leukemia
0.7	SERPINB6	Acute Lymphoblastic Leukemia			0.086	2579_17_MMP9_MMP_9	Acute Lymphoblastic Leukemia
0.909	SERPINH1	Acute Lymphoblastic Leukemia			0.76	2580_83_MPO_Myeloperoxidase	Acute Lymphoblastic Leukemia
0.932	SETD3	Acute Lymphoblastic Leukemia			0.484	2590_69_ROR1_ROR1	Acute Lymphoblastic Leukemia
0.895	SETD9	Acute Lymphoblastic Leukemia			0.472	2597_8_VEGFA_VEGF	Acute Lymphoblastic Leukemia
0.954	SETDB1	Acute Lymphoblastic Leukemia			0.832	2602_2_ANGPT2_Angiopoietin_2	Acute Lymphoblastic Leukemia
0.772	SFI1	Acute Lymphoblastic Leukemia			0.615	2609_59_CST3_Cystatin_C	Acute Lymphoblastic Leukemia
0.797	SFMBT1	Acute Lymphoblastic Leukemia			0.068	2611_72_TYRO3_Dtk	Acute Lymphoblastic Leukemia
0.336	SFT2D1	Acute Lymphoblastic Leukemia			0.226	2615_60_EFNA5_Ephrin_A5	Acute Lymphoblastic Leukemia
0.602	SGCE	Acute Lymphoblastic Leukemia			0.361	2617_56_ERBB3_ERBB3	Acute Lymphoblastic Leukemia
0.926	SH2B3	Acute Lymphoblastic Leukemia			0.958	2618_10_ERBB4_ERBB4	Acute Lymphoblastic Leukemia
0.424	SH2D3C	Acute Lymphoblastic Leukemia			0.742	2620_4_IL6ST_gp130__soluble	Acute Lymphoblastic Leukemia
0.247	SH3BP1	Acute Lymphoblastic Leukemia			0.367	2631_50_IL10RB_IL_10_Rb	Acute Lymphoblastic Leukemia
0.166	SH3PXD2B	Acute Lymphoblastic Leukemia			0.402	2635_61_LAYN_Layilin	Acute Lymphoblastic Leukemia
0.97	SHKBP1	Acute Lymphoblastic Leukemia			0.219	2636_10_LTBR_Lymphotoxin_b_R	Acute Lymphoblastic Leukemia
0.611	SHROOM1	Acute Lymphoblastic Leukemia			0.415	2637_77_MRC1_Macrophage_mannose_receptor	Acute Lymphoblastic Leukemia
0.043	SIGLEC14	Acute Lymphoblastic Leukemia			0.356	2640_3_MST1R_MSP_R	Acute Lymphoblastic Leukemia
0.696	SIL1	Acute Lymphoblastic Leukemia			0.804	2643_57_CDH3_P_Cadherin	Acute Lymphoblastic Leukemia
0.562	SIRT1	Acute Lymphoblastic Leukemia			1	2644_11_PRKCA_PKC_A	Acute Lymphoblastic Leukemia
0.356	SIX5	Acute Lymphoblastic Leukemia			0.485	2649_77_ICAM3_sICAM_3	Acute Lymphoblastic Leukemia
0.659	SKAP2	Acute Lymphoblastic Leukemia			0.786	2652_15_PLAUR_suPAR	Acute Lymphoblastic Leukemia
0.209	SLAMF1	Acute Lymphoblastic Leukemia			0.549	2654_19_TNFRSF1A_TNF_sR_I	Acute Lymphoblastic Leukemia
0.374	SLBP	Acute Lymphoblastic Leukemia			0.959	2658_27_NTRK3_TrkC	Acute Lymphoblastic Leukemia
0.715	SLC11A2	Acute Lymphoblastic Leukemia			0.169	2665_26_TNFRSF17_BCMA	Acute Lymphoblastic Leukemia
0.423	SLC12A9	Acute Lymphoblastic Leukemia			0.849	2677_1_EGFR_ERBB1	Acute Lymphoblastic Leukemia
0.915	SLC13A4	Acute Lymphoblastic Leukemia			0.492	2681_23_HGF_HGF	Acute Lymphoblastic Leukemia
0.36	SLC16A1	Acute Lymphoblastic Leukemia			0.854	2687_2_MIA_MIA	Acute Lymphoblastic Leukemia
0.863	SLC16A3	Acute Lymphoblastic Leukemia			0.505	2692_74_PLA2G2A_NPS_PLA2	Acute Lymphoblastic Leukemia
0.691	SLC16A6	Acute Lymphoblastic Leukemia			0.426	2693_20_OSM_OSM	Acute Lymphoblastic Leukemia
0.941	SLC17A3	Acute Lymphoblastic Leukemia			0.464	2695_25_PECAM1_PECAM_1	Acute Lymphoblastic Leukemia
0.845	SLC17A9	Acute Lymphoblastic Leukemia			0.224	2697_7_PF4_PF_4	Acute Lymphoblastic Leukemia
0.599	SLC23A3	Acute Lymphoblastic Leukemia			0.576	2700_56_PROS1_Protein_S	Acute Lymphoblastic Leukemia
0.507	SLC24A1	Acute Lymphoblastic Leukemia			0.458	2704_74_TNFRSF13B_TACI	Acute Lymphoblastic Leukemia
0.391	SLC25A19	Acute Lymphoblastic Leukemia			0.761	2705_5_CCL25_TECK	Acute Lymphoblastic Leukemia
0.604	SLC25A22	Acute Lymphoblastic Leukemia			0.202	2706_69_SERPINA7_Thyroxine_Binding_Globulin	Acute Lymphoblastic Leukemia
0.556	SLC25A34	Acute Lymphoblastic Leukemia			0.36	2708_54_TNFSF18_TNFSF18	Acute Lymphoblastic Leukemia
0.21	SLC25A46	Acute Lymphoblastic Leukemia			0.301	2714_78_AIMP1_EMAP_2	Acute Lymphoblastic Leukemia
0.822	SLC29A4	Acute Lymphoblastic Leukemia			0.501	2723_9_IL37_IL_1F7	Acute Lymphoblastic Leukemia
0.301	SLC35A1	Acute Lymphoblastic Leukemia			0.094	2730_58_MICA_MICA	Acute Lymphoblastic Leukemia
0.461	SLC35B4	Acute Lymphoblastic Leukemia			0.965	2731_29_POR_NADPH_P450_Oxidoreductase	Acute Lymphoblastic Leukemia
0.053	SLC35C1	Acute Lymphoblastic Leukemia			0.721	2732_58_NANOG_NANOG	Acute Lymphoblastic Leukemia
0.878	SLC35D1	Acute Lymphoblastic Leukemia			0.263	2741_22_SIGLEC6_Siglec_6	Acute Lymphoblastic Leukemia
0.85	SLC35D2	Acute Lymphoblastic Leukemia			0.545	2742_68_SIGLEC7_Siglec_7	Acute Lymphoblastic Leukemia
0.292	SLC35E3	Acute Lymphoblastic Leukemia			0.386	2743_5_SHH_Sonic_Hedgehog	Acute Lymphoblastic Leukemia
0.37	SLC35E4	Acute Lymphoblastic Leukemia			0.919	2750_3_APOA1_Apo_A_I	Acute Lymphoblastic Leukemia
0.737	SLC37A1	Acute Lymphoblastic Leukemia			0.441	2752_62_GDF5_BMP_14	Acute Lymphoblastic Leukemia
0.798	SLC37A3	Acute Lymphoblastic Leukemia			0.323	2754_50_C3_C3	Acute Lymphoblastic Leukemia
0.563	SLC41A3	Acute Lymphoblastic Leukemia			0.555	2760_2_FAM107A_DRR1	Acute Lymphoblastic Leukemia
0.843	SLC48A1	Acute Lymphoblastic Leukemia			0.262	2770_51_CCL1_I_309	Acute Lymphoblastic Leukemia
0.83	SLC51A	Acute Lymphoblastic Leukemia			0.126	2774_10_IL16_IL_16	Acute Lymphoblastic Leukemia
0.917	SLC5A11	Acute Lymphoblastic Leukemia			0.519	2780_35_LTF_Lactoferrin	Acute Lymphoblastic Leukemia
0.636	SLC5A6	Acute Lymphoblastic Leukemia			0.699	2783_18_CCL3L1_LD78_beta	Acute Lymphoblastic Leukemia
0.715	SLC6A12	Acute Lymphoblastic Leukemia			0.461	2788_55_MMP3_MMP_3	Acute Lymphoblastic Leukemia
0.658	SLC6A16	Acute Lymphoblastic Leukemia			0.688	2789_26_MMP7_MMP_7	Acute Lymphoblastic Leukemia
0.252	SLC7A10	Acute Lymphoblastic Leukemia			0.827	2790_54_PPBP_NAP_2	Acute Lymphoblastic Leukemia
0.536	SLC7A7	Acute Lymphoblastic Leukemia			0.077	2797_56_APOB_Apo_B	Acute Lymphoblastic Leukemia
0.654	SLC7A8	Acute Lymphoblastic Leukemia			0.638	2811_27_ANGPT1_Angiopoietin_1	Acute Lymphoblastic Leukemia
0.203	SLC9A3R1	Acute Lymphoblastic Leukemia			0.462	2813_11_AGRP_ART	Acute Lymphoblastic Leukemia
0.665	SLX4IP	Acute Lymphoblastic Leukemia			0.635	2816_50_BCAM_BCAM	Acute Lymphoblastic Leukemia
0.122	SMAD5	Acute Lymphoblastic Leukemia			0.673	2819_23_CDH5_Cadherin_5	Acute Lymphoblastic Leukemia
0.743	SMC1B	Acute Lymphoblastic Leukemia			0.485	2823_7_COMMD7_COMMD7	Acute Lymphoblastic Leukemia
0.531	SMC2	Acute Lymphoblastic Leukemia			0.403	2826_53_EDA_EDA	Acute Lymphoblastic Leukemia
0.628	SMC4	Acute Lymphoblastic Leukemia			0.638	2827_23_CX3CL1_Fractalkine_CX3CL_1	Acute Lymphoblastic Leukemia
0.415	SMG9	Acute Lymphoblastic Leukemia			0.813	2828_82_SPINT1_HAI_1	Acute Lymphoblastic Leukemia
0.979	SMIM7	Acute Lymphoblastic Leukemia			0.571	2831_29_KLK11_Kallikrein_11	Acute Lymphoblastic Leukemia
0.179	SMPD2	Acute Lymphoblastic Leukemia			0.152	2834_54_KLK8_kallikrein_8	Acute Lymphoblastic Leukemia
0.709	SMPD4	Acute Lymphoblastic Leukemia			0.904	2836_68_LCN2_Lipocalin_2	Acute Lymphoblastic Leukemia
0.972	SNHG5	Acute Lymphoblastic Leukemia			0.502	2837_3_MET_Met	Acute Lymphoblastic Leukemia
0.575	SNORA16	Acute Lymphoblastic Leukemia			0.364	2838_53_MMP17_MMP_17	Acute Lymphoblastic Leukemia
0.58	SOD2	Acute Lymphoblastic Leukemia			0.632	2843_13_SPINT2_SPINT2	Acute Lymphoblastic Leukemia
0.19	SOS2	Acute Lymphoblastic Leukemia			0.572	2844_53_TIE1_sTie_1	Acute Lymphoblastic Leukemia
0.443	SOX4	Acute Lymphoblastic Leukemia			0.399	2849_49_AIF1_AIF1	Acute Lymphoblastic Leukemia
0.952	SP1	Acute Lymphoblastic Leukemia			0.807	2851_63_C5_C5a	Acute Lymphoblastic Leukemia
0.7	SPAG1	Acute Lymphoblastic Leukemia			0.375	2853_68_CHEK1_CHK1	Acute Lymphoblastic Leukemia
0.835	SPATA24	Acute Lymphoblastic Leukemia			0.587	2859_69_HDAC8_HDAC8	Acute Lymphoblastic Leukemia
0.321	SPATA32	Acute Lymphoblastic Leukemia			0.912	2860_19_KPNA2_Karyopherin_a2	Acute Lymphoblastic Leukemia
0.835	SPATA7	Acute Lymphoblastic Leukemia			0.243	2871_73_RAD51_RAD51	Acute Lymphoblastic Leukemia
0.346	SPATC1	Acute Lymphoblastic Leukemia			0.838	2888_49_C7_C7	Acute Lymphoblastic Leukemia
0.892	SPCS3	Acute Lymphoblastic Leukemia			0.576	2889_37_CTF1_Cardiotrophin_1	Acute Lymphoblastic Leukemia
0.953	SPDYE6	Acute Lymphoblastic Leukemia			0.294	2890_59_CCL28_CCL28	Acute Lymphoblastic Leukemia
0.752	SPECC1L	Acute Lymphoblastic Leukemia			0.544	2900_53_CCL14_HCC_1	Acute Lymphoblastic Leukemia
0.569	SPEF2	Acute Lymphoblastic Leukemia			0.62	2906_55_IL4_IL_4	Acute Lymphoblastic Leukemia
0.889	SPIRE1	Acute Lymphoblastic Leukemia			0.425	2911_27_MDK_Midkine	Acute Lymphoblastic Leukemia
0.962	SPRYD4	Acute Lymphoblastic Leukemia			0.596	2913_1_CCL23_MPIF_1	Acute Lymphoblastic Leukemia
0.965	SPSB1	Acute Lymphoblastic Leukemia			0.638	2925_9_SERPINE1_PAI_1	Acute Lymphoblastic Leukemia
0.821	SPTBN1	Acute Lymphoblastic Leukemia			0.325	2939_10_ARTN_Artemin	Acute Lymphoblastic Leukemia
0.603	SPTBN5	Acute Lymphoblastic Leukemia			0.605	2942_50_CYCS_Cytochrome_c	Acute Lymphoblastic Leukemia
0.819	SPTLC2	Acute Lymphoblastic Leukemia			0.317	2943_5_CYP3A4_Cytochrome_P450_3A4	Acute Lymphoblastic Leukemia
0.992	SRBD1	Acute Lymphoblastic Leukemia			0.087	2944_66_NBL1_DAN	Acute Lymphoblastic Leukemia
0.902	SRD5A3-AS1	Acute Lymphoblastic Leukemia			0.213	2946_52_CFD_Factor_D	Acute Lymphoblastic Leukemia
0.072	SRI	Acute Lymphoblastic Leukemia			0.885	2948_58_GHR_Growth_hormone_receptor	Acute Lymphoblastic Leukemia
0.98	SRPK2	Acute Lymphoblastic Leukemia			0.421	2949_6_PLA2G10_GX	Acute Lymphoblastic Leukemia
0.911	SSH2	Acute Lymphoblastic Leukemia			0.272	2950_57_IGFBP4_IGFBP_4	Acute Lymphoblastic Leukemia
0.67	ST6GALNAC3	Acute Lymphoblastic Leukemia			0.445	2952_75_IGF1_IGF_I	Acute Lymphoblastic Leukemia
0.035	ST7L	Acute Lymphoblastic Leukemia			0.46	2960_66_CFP_Properdin	Acute Lymphoblastic Leukemia
0.19	ST8SIA1	Acute Lymphoblastic Leukemia			0.451	2961_1_PROC_Protein_C	Acute Lymphoblastic Leukemia
0.993	STAG3	Acute Lymphoblastic Leukemia			0.863	2962_50_PTHLH_PTHrP	Acute Lymphoblastic Leukemia
0.786	STAP1	Acute Lymphoblastic Leukemia			0.718	2966_65_CLEC11A_SCGF_beta	Acute Lymphoblastic Leukemia
0.143	STK10	Acute Lymphoblastic Leukemia			0.452	2967_8_VCAM1_VCAM_1	Acute Lymphoblastic Leukemia
0.993	STK33	Acute Lymphoblastic Leukemia			0.015	2972_57_BMP7_BMP_7	Acute Lymphoblastic Leukemia
0.268	STK36	Acute Lymphoblastic Leukemia			0.379	2973_15_CD36_CD36_ANTIGEN	Acute Lymphoblastic Leukemia
0.591	STK38L	Acute Lymphoblastic Leukemia			0.964	2974_61_CNTN1_contactin_1	Acute Lymphoblastic Leukemia
0.547	SUCLA2	Acute Lymphoblastic Leukemia			0.227	2976_58_DSG1_Desmoglein_1	Acute Lymphoblastic Leukemia
0.938	SUCLG2	Acute Lymphoblastic Leukemia			0.62	2977_7_EDAR_EDAR	Acute Lymphoblastic Leukemia
0.516	SUPT20H	Acute Lymphoblastic Leukemia			0.414	2979_8_CXCL5_ENA_78	Acute Lymphoblastic Leukemia
0.357	SUPT3H	Acute Lymphoblastic Leukemia			0.877	2985_35_CXCL1_Gro_a	Acute Lymphoblastic Leukemia
0.286	SUPV3L1	Acute Lymphoblastic Leukemia			0.577	2991_9_IL1R1_IL_1_sRI	Acute Lymphoblastic Leukemia
0.536	SURF6	Acute Lymphoblastic Leukemia			0.78	2992_59_IL17RA_IL_17_sR	Acute Lymphoblastic Leukemia
0.642	SUZ12P	Acute Lymphoblastic Leukemia			0.656	2993_1_IL18RAP_IL_18_Rb	Acute Lymphoblastic Leukemia
0.743	SYK	Acute Lymphoblastic Leukemia			0.778	2994_71_IL1RL2_IL_1Rrp2	Acute Lymphoblastic Leukemia
0.247	SYN2	Acute Lymphoblastic Leukemia			0.097	2999_6_LSAMP_LSAMP	Acute Lymphoblastic Leukemia
0.672	SYTL1	Acute Lymphoblastic Leukemia			0.098	3000_66_MBL2_MBL	Acute Lymphoblastic Leukemia
0.526	SYTL2	Acute Lymphoblastic Leukemia			0.915	3003_29_NCR3_NKp30	Acute Lymphoblastic Leukemia
0.89	TACC1	Acute Lymphoblastic Leukemia			0.766	3004_67_PDCD1LG2_PD_L2	Acute Lymphoblastic Leukemia
0.518	TAF1D	Acute Lymphoblastic Leukemia			0.314	3007_7_SIGLEC9_Siglec_9	Acute Lymphoblastic Leukemia
0.962	TANK	Acute Lymphoblastic Leukemia			0.691	3009_3_TGFBR3_TGF_b_R_III	Acute Lymphoblastic Leukemia
0.6	TAPBP	Acute Lymphoblastic Leukemia			0.253	3024_18_SERPINF2_a2_Antiplasmin	Acute Lymphoblastic Leukemia
0.384	TAPT1	Acute Lymphoblastic Leukemia			0.706	3025_50_FGF2_bFGF	Acute Lymphoblastic Leukemia
0.394	TBC1D2B	Acute Lymphoblastic Leukemia			0.847	3026_5_CAST_Calpastatin	Acute Lymphoblastic Leukemia
0.076	TBC1D30	Acute Lymphoblastic Leukemia			0.451	3028_36_CCL23_Ck_b_8_1	Acute Lymphoblastic Leukemia
0.91	TBC1D3F	Acute Lymphoblastic Leukemia			0.141	3029_52_CD209_DC_SIGN	Acute Lymphoblastic Leukemia
0.156	TBC1D9B	Acute Lymphoblastic Leukemia			0.55	3030_3_CLEC4M_DC_SIGNR	Acute Lymphoblastic Leukemia
0.682	TBCK	Acute Lymphoblastic Leukemia			0.446	3033_57_LGALS2_Galectin_2	Acute Lymphoblastic Leukemia
0.686	TBKBP1	Acute Lymphoblastic Leukemia			0.282	3035_80_IL19_IL_19	Acute Lymphoblastic Leukemia
0.344	TBPL1	Acute Lymphoblastic Leukemia			0.37	3037_62_IL1B_IL_1b	Acute Lymphoblastic Leukemia
0.987	TCF19	Acute Lymphoblastic Leukemia			0.463	3038_9_CXCL11_I_TAC	Acute Lymphoblastic Leukemia
0.606	TCL1A	Acute Lymphoblastic Leukemia			0.551	3040_59_CCL3_MIP_1a	Acute Lymphoblastic Leukemia
0.548	TCTEX1D1	Acute Lymphoblastic Leukemia			0.762	3041_55_MRC2_MRC2	Acute Lymphoblastic Leukemia
0.607	TCTEX1D2	Acute Lymphoblastic Leukemia			0.374	3042_7_MB_Myoglobin	Acute Lymphoblastic Leukemia
0.495	TCTN2	Acute Lymphoblastic Leukemia			0.737	3043_49_SPARC_ON	Acute Lymphoblastic Leukemia
0.974	TEFM	Acute Lymphoblastic Leukemia			0.778	3044_3_CCL18_PARC	Acute Lymphoblastic Leukemia
0.126	TEK	Acute Lymphoblastic Leukemia			0.135	3045_72_PTN_PTN	Acute Lymphoblastic Leukemia
0.507	TF	Acute Lymphoblastic Leukemia			0.815	3046_31_RETN_resistin	Acute Lymphoblastic Leukemia
0.628	TFDP2	Acute Lymphoblastic Leukemia			0.279	3049_61_PRSS1_Trypsin	Acute Lymphoblastic Leukemia
0.998	TFRC	Acute Lymphoblastic Leukemia			0.958	3050_7_VWF_vWF	Acute Lymphoblastic Leukemia
0.911	TGFA	Acute Lymphoblastic Leukemia			0.182	3052_8_FASLG_Fas_ligand__soluble	Acute Lymphoblastic Leukemia
0.323	TGM1	Acute Lymphoblastic Leukemia			0.633	3054_3_HP_Haptoglobin__Mixed_Type	Acute Lymphoblastic Leukemia
0.77	TGM2	Acute Lymphoblastic Leukemia			0.699	3059_50_TNFSF13B_BAFF	Acute Lymphoblastic Leukemia
0.703	TGM3	Acute Lymphoblastic Leukemia			0.293	3060_43_C9_C9	Acute Lymphoblastic Leukemia
0.959	THBS3	Acute Lymphoblastic Leukemia			0.874	3066_12_LGALS3_Galectin_3	Acute Lymphoblastic Leukemia
0.71	THNSL1	Acute Lymphoblastic Leukemia			0.417	3073_51_IL18BP_IL_18_BPa	Acute Lymphoblastic Leukemia
0.773	THOC7	Acute Lymphoblastic Leukemia			0.74	3074_6_LBP_LBP	Acute Lymphoblastic Leukemia
0.172	TIGD3	Acute Lymphoblastic Leukemia			0.69	3077_66_F10_Coagulation_Factor_Xa	Acute Lymphoblastic Leukemia
0.329	TIPRL	Acute Lymphoblastic Leukemia			0.872	3079_62_RARRES2_TIG2	Acute Lymphoblastic Leukemia
0.08	TJP2	Acute Lymphoblastic Leukemia			0.449	3091_70_AURKA_Aurora_kinase_A	Acute Lymphoblastic Leukemia
0.417	TM4SF19-AS1	Acute Lymphoblastic Leukemia			0.907	3143_3_CD4_sCD4	Acute Lymphoblastic Leukemia
0.667	TM4SF19	Acute Lymphoblastic Leukemia			0.809	3152_57_TNFRSF1B_TNF_sR_II	Acute Lymphoblastic Leukemia
0.772	TMBIM6	Acute Lymphoblastic Leukemia			0.719	3166_92_CD33_Siglec_3	Acute Lymphoblastic Leukemia
0.648	TMEM109	Acute Lymphoblastic Leukemia			0.463	3168_8_ADAMTS5_ADAMTS_5	Acute Lymphoblastic Leukemia
0.605	TMEM110	Acute Lymphoblastic Leukemia			0.348	3169_70_IDUA_IDUA	Acute Lymphoblastic Leukemia
0.965	TMEM119	Acute Lymphoblastic Leukemia			0.919	3170_6_METAP2_AMPM2	Acute Lymphoblastic Leukemia
0.868	TMEM129	Acute Lymphoblastic Leukemia			0.113	3171_57_APP_amyloid_precursor_protein	Acute Lymphoblastic Leukemia
0.581	TMEM173	Acute Lymphoblastic Leukemia			0.552	3172_28_ARSB_ARSB	Acute Lymphoblastic Leukemia
0.121	TMEM177	Acute Lymphoblastic Leukemia			0.293	3173_49_NAAA_ASAHL	Acute Lymphoblastic Leukemia
0.609	TMEM200A	Acute Lymphoblastic Leukemia			0.428	3175_51_ADAMTS13_ATS13	Acute Lymphoblastic Leukemia
0.645	TMEM245	Acute Lymphoblastic Leukemia			0.439	3178_5_CTSC_CATC	Acute Lymphoblastic Leukemia
0.379	TMEM254	Acute Lymphoblastic Leukemia			0.658	3179_51_CTSA_Cathepsin_A	Acute Lymphoblastic Leukemia
0.749	TMEM258	Acute Lymphoblastic Leukemia			0.967	3181_50_CTSS_Cathepsin_S	Acute Lymphoblastic Leukemia
0.426	TMEM5	Acute Lymphoblastic Leukemia			0.421	3182_38_ENTPD1_CD39	Acute Lymphoblastic Leukemia
0.958	TMEM50A	Acute Lymphoblastic Leukemia			0.843	3184_25_F7_Coagulation_Factor_VII	Acute Lymphoblastic Leukemia
0.44	TMEM63B	Acute Lymphoblastic Leukemia			0.663	3186_2_C2_C2	Acute Lymphoblastic Leukemia
0.48	TMEM70	Acute Lymphoblastic Leukemia			0.644	3189_61_TMPRSS15_Enterokinase	Acute Lymphoblastic Leukemia
0.463	TMEM71	Acute Lymphoblastic Leukemia			0.995	3191_50_WFIKKN1_WFKN1	Acute Lymphoblastic Leukemia
0.46	TMEM86B	Acute Lymphoblastic Leukemia			0.462	3192_3_CNDP2_Glutamate_carboxypeptidase	Acute Lymphoblastic Leukemia
0.01	TMEM9	Acute Lymphoblastic Leukemia			0.601	3194_36_GP6_GPVI	Acute Lymphoblastic Leukemia
0.586	TMEM9B	Acute Lymphoblastic Leukemia			0.493	3195_50_GNLY_Granulysin	Acute Lymphoblastic Leukemia
0.757	TMTC4	Acute Lymphoblastic Leukemia			0.962	3196_6_HAPLN1_HPLN1	Acute Lymphoblastic Leukemia
0.972	TNFAIP8L2	Acute Lymphoblastic Leukemia			0.849	3198_4_IDS_IDS	Acute Lymphoblastic Leukemia
0.578	TNFRSF1A	Acute Lymphoblastic Leukemia			0.22	3199_54_KLK12_kallikrein_12	Acute Lymphoblastic Leukemia
0.831	TNKS2	Acute Lymphoblastic Leukemia			0.355	3206_4_LYVE1_LYVE1	Acute Lymphoblastic Leukemia
0.996	TOMM34	Acute Lymphoblastic Leukemia			0.829	3212_30_ASAH2_ASAH2	Acute Lymphoblastic Leukemia
0.924	TOMM5	Acute Lymphoblastic Leukemia			0.202	3213_65_NID1_Nidogen	Acute Lymphoblastic Leukemia
0.754	TOMM7	Acute Lymphoblastic Leukemia			0.441	3216_2_PIGR_PIGR	Acute Lymphoblastic Leukemia
0.506	TOMM70A	Acute Lymphoblastic Leukemia			0.921	3220_40_RET_RET	Acute Lymphoblastic Leukemia
0.65	TOP3B	Acute Lymphoblastic Leukemia			0.939	3221_54_SFRP1_SARP_2	Acute Lymphoblastic Leukemia
0.16	TPD52	Acute Lymphoblastic Leukemia			0.63	3232_28_ACP5_TrATPase	Acute Lymphoblastic Leukemia
0.541	TPD52L1	Acute Lymphoblastic Leukemia			0.146	3234_23_CCDC80_URB	Acute Lymphoblastic Leukemia
0.974	TPM1	Acute Lymphoblastic Leukemia			0.304	3235_50_WFIKKN2_WFKN2	Acute Lymphoblastic Leukemia
0.457	TPM3	Acute Lymphoblastic Leukemia			0.705	3280_49_ACAN_Aggrecan	Acute Lymphoblastic Leukemia
0.957	TPM4	Acute Lymphoblastic Leukemia			0.431	3283_21_TGFBI_BGH3	Acute Lymphoblastic Leukemia
0.85	TPR	Acute Lymphoblastic Leukemia			0.057	3284_75_BGN_BGN	Acute Lymphoblastic Leukemia
0.432	TPST1	Acute Lymphoblastic Leukemia			0.882	3285_23_C1R_C1r	Acute Lymphoblastic Leukemia
0.928	TRAF3	Acute Lymphoblastic Leukemia			0.755	3290_50_CD109_CD109	Acute Lymphoblastic Leukemia
0.234	TRAF5	Acute Lymphoblastic Leukemia			0.437	3291_30_FCER2_CD23	Acute Lymphoblastic Leukemia
0.488	TRAM2	Acute Lymphoblastic Leukemia			0.845	3292_75_CD48_CD48	Acute Lymphoblastic Leukemia
0.257	TRANK1	Acute Lymphoblastic Leukemia			0.475	3293_2_CD5L_CD5L	Acute Lymphoblastic Leukemia
0.557	TRAP1	Acute Lymphoblastic Leukemia			0.841	3296_92_CNTN2_CNTN2	Acute Lymphoblastic Leukemia
0.851	TRAT1	Acute Lymphoblastic Leukemia			0.444	3298_52_CNTN4_Contactin_4	Acute Lymphoblastic Leukemia
0.693	TRBV19	Acute Lymphoblastic Leukemia			0.615	3299_29_CNTN5_Contactin_5	Acute Lymphoblastic Leukemia
0.463	TRBV25-1	Acute Lymphoblastic Leukemia			0.587	3302_58_CST7_CYTF	Acute Lymphoblastic Leukemia
0.982	TRBV30	Acute Lymphoblastic Leukemia			0.553	3305_6_DLL4_DLL4	Acute Lymphoblastic Leukemia
0.718	TRBV4-1	Acute Lymphoblastic Leukemia			0.137	3309_2_FCGR2A_FCG2A	Acute Lymphoblastic Leukemia
0.003	TRGC1	Acute Lymphoblastic Leukemia			0.126	3310_62_FCGR2B_FCG2B	Acute Lymphoblastic Leukemia
0.346	TRGV2	Acute Lymphoblastic Leukemia			0.98	3311_27_FCGR3B_FCG3B	Acute Lymphoblastic Leukemia
0.446	TRGV4	Acute Lymphoblastic Leukemia			0.856	3313_21_FCN2_FCN2	Acute Lymphoblastic Leukemia
0.362	TRGV5	Acute Lymphoblastic Leukemia			0.686	3314_74_GFRA1_GFRa_1	Acute Lymphoblastic Leukemia
0.237	TRGV5P	Acute Lymphoblastic Leukemia			0.387	3316_58_SERPIND1_Heparin_cofactor_II	Acute Lymphoblastic Leukemia
0.421	TRGV7	Acute Lymphoblastic Leukemia			0.806	3320_49_IGFBP7_IGFBP_7	Acute Lymphoblastic Leukemia
0.995	TRGV9	Acute Lymphoblastic Leukemia			0.211	3322_52_LRIG3_LRIG3	Acute Lymphoblastic Leukemia
0.635	TRIM38	Acute Lymphoblastic Leukemia			0.668	3323_37_LRP8_LRP8	Acute Lymphoblastic Leukemia
0.996	TRIM4	Acute Lymphoblastic Leukemia			0.88	3324_51_LY9_LY9	Acute Lymphoblastic Leukemia
0.375	TRIM56	Acute Lymphoblastic Leukemia			0.892	3325_2_MATN2_MATN2	Acute Lymphoblastic Leukemia
0.46	TRIM60P18	Acute Lymphoblastic Leukemia			0.441	3326_58_CADM1_Nectin_like_protein_2	Acute Lymphoblastic Leukemia
0.552	TRIM66	Acute Lymphoblastic Leukemia			0.576	3327_27_NTN4_NET4	Acute Lymphoblastic Leukemia
0.273	TRIM7	Acute Lymphoblastic Leukemia			0.564	3329_14_PGLYRP1_PGRP_S	Acute Lymphoblastic Leukemia
0.142	TRIP11	Acute Lymphoblastic Leukemia			0.967	3331_8_RGMB_RGMB	Acute Lymphoblastic Leukemia
0.825	TRIP6	Acute Lymphoblastic Leukemia			0.9	3336_50_TFPI_TFPI	Acute Lymphoblastic Leukemia
0.519	TRIT1	Acute Lymphoblastic Leukemia			0.908	3339_33_THBS2_TSP2	Acute Lymphoblastic Leukemia
0.761	TRMT112	Acute Lymphoblastic Leukemia			0.989	3340_53_THBS4_TSP4	Acute Lymphoblastic Leukemia
0.827	TRMT12	Acute Lymphoblastic Leukemia			0.902	3343_1_ACY1_Aminoacylase_1	Acute Lymphoblastic Leukemia
0.165	TRMT61A	Acute Lymphoblastic Leukemia			0.53	3346_72_AURKB_AURKB	Acute Lymphoblastic Leukemia
0.329	TRNT1	Acute Lymphoblastic Leukemia			0.99	3352_80_CA6_Carbonic_anhydrase_6	Acute Lymphoblastic Leukemia
0.297	TRPM6	Acute Lymphoblastic Leukemia			0.974	3362_61_CHRDL1_CRDL1	Acute Lymphoblastic Leukemia
0.997	TRPV2	Acute Lymphoblastic Leukemia			0.432	3364_76_CTSV_Cathepsin_V	Acute Lymphoblastic Leukemia
0.573	TRPV4	Acute Lymphoblastic Leukemia			0.828	3365_7_DKK4_Dkk_4	Acute Lymphoblastic Leukemia
0.923	TRPV5	Acute Lymphoblastic Leukemia			0.992	3366_51_ECM1_ECM1	Acute Lymphoblastic Leukemia
0.881	TSEN2	Acute Lymphoblastic Leukemia			0.199	3367_8_FETUB_FETUB	Acute Lymphoblastic Leukemia
0.252	TSPAN32	Acute Lymphoblastic Leukemia			0.456	3376_49_IL17RD_IL_17_RD	Acute Lymphoblastic Leukemia
0.619	TSPAN4	Acute Lymphoblastic Leukemia			0.544	3387_1_PAK3_PAK3	Acute Lymphoblastic Leukemia
0.829	TSPO	Acute Lymphoblastic Leukemia			0.425	3389_7_SERPINA5_PCI	Acute Lymphoblastic Leukemia
0.754	TSPYL5	Acute Lymphoblastic Leukemia			0.346	3391_10_PIK3CG_PK3CG	Acute Lymphoblastic Leukemia
0.799	TTC17	Acute Lymphoblastic Leukemia			0.426	3396_54_REN_Renin	Acute Lymphoblastic Leukemia
0.381	TTC21A	Acute Lymphoblastic Leukemia			0.297	3399_31_STAB2_STAB2	Acute Lymphoblastic Leukemia
0.611	TTC21B	Acute Lymphoblastic Leukemia			0.594	3403_1_TPSB2_TPSB2	Acute Lymphoblastic Leukemia
0.782	TTC27	Acute Lymphoblastic Leukemia			0.179	3413_50_BCL2A1_BFL1	Acute Lymphoblastic Leukemia
0.079	TTC3	Acute Lymphoblastic Leukemia			0.324	3415_61_IBSP_BSP	Acute Lymphoblastic Leukemia
0.327	TTC32	Acute Lymphoblastic Leukemia			0.371	3418_12_CAMK1D_CAMK1D	Acute Lymphoblastic Leukemia
0.969	TTC33	Acute Lymphoblastic Leukemia			0.164	3420_21_CA13_Carbonic_anhydrase_XIII	Acute Lymphoblastic Leukemia
0.294	TTC40	Acute Lymphoblastic Leukemia			0.667	3421_54_TNFSF8_CD30_Ligand	Acute Lymphoblastic Leukemia
0.377	TTC5	Acute Lymphoblastic Leukemia			0.282	3431_54_EPHA1_EphA1	Acute Lymphoblastic Leukemia
0.972	TTF2	Acute Lymphoblastic Leukemia			0.381	3435_53_FN1_FN1_4	Acute Lymphoblastic Leukemia
0.948	TTLL12	Acute Lymphoblastic Leukemia			0.273	3437_80_FLT3_Flt_3	Acute Lymphoblastic Leukemia
0.594	TTLL2	Acute Lymphoblastic Leukemia			0.119	3438_10_FSTL3_FSTL3	Acute Lymphoblastic Leukemia
0.681	TUBA1C	Acute Lymphoblastic Leukemia			0.618	3440_7_GZMA_granzyme_A	Acute Lymphoblastic Leukemia
0.396	TUBB4A	Acute Lymphoblastic Leukemia			0.583	3445_53_IL15RA_IL_15_Ra	Acute Lymphoblastic Leukemia
0.926	TULP4	Acute Lymphoblastic Leukemia			0.421	3447_64_CXCL8_IL_8	Acute Lymphoblastic Leukemia
0.986	TYMP	Acute Lymphoblastic Leukemia			0.356	3448_13_INSR_IR	Acute Lymphoblastic Leukemia
0.704	TYMS	Acute Lymphoblastic Leukemia			0.071	3449_58_SERPINA4_Kallistatin	Acute Lymphoblastic Leukemia
0.636	TYW1B	Acute Lymphoblastic Leukemia			0.258	3450_4_KLK6_Kallikrein_6	Acute Lymphoblastic Leukemia
0.926	U1	Acute Lymphoblastic Leukemia			0.562	3457_57_POSTN_Periostin	Acute Lymphoblastic Leukemia
0.308	UBALD2	Acute Lymphoblastic Leukemia			0.992	3459_49_PDGFRB_PDGF_Rb	Acute Lymphoblastic Leukemia
0.704	UBAP2L	Acute Lymphoblastic Leukemia			0.101	3470_1_SELE_sE_Selectin	Acute Lymphoblastic Leukemia
0.063	UBASH3A	Acute Lymphoblastic Leukemia			0.27	3471_49_STK16_STK16	Acute Lymphoblastic Leukemia
0.49	UBASH3B	Acute Lymphoblastic Leukemia			0.453	3472_40_BIRC5_Survivin	Acute Lymphoblastic Leukemia
0.052	UBE2J1	Acute Lymphoblastic Leukemia			0.133	3474_19_THBS1_Thrombospondin_1	Acute Lymphoblastic Leukemia
0.062	UBE2K	Acute Lymphoblastic Leukemia			0.498	3477_63_NTRK1_TrkA	Acute Lymphoblastic Leukemia
0.185	UBE3B	Acute Lymphoblastic Leukemia			0.172	3484_60_AGT_Angiotensinogen	Acute Lymphoblastic Leukemia
0.666	UBFD1	Acute Lymphoblastic Leukemia			0.456	3485_28_B2M_b2_Microglobulin	Acute Lymphoblastic Leukemia
0.528	UCKL1	Acute Lymphoblastic Leukemia			0.657	3487_32_CXCL13_BLC	Acute Lymphoblastic Leukemia
0.375	UCP2	Acute Lymphoblastic Leukemia			0.096	3488_64_CAT_Catalase	Acute Lymphoblastic Leukemia
0.765	UGCG	Acute Lymphoblastic Leukemia			0.576	3489_9_CNTF_CNTF	Acute Lymphoblastic Leukemia
0.018	UGDH	Acute Lymphoblastic Leukemia			0.525	3495_15_CXCL6_GCP_2	Acute Lymphoblastic Leukemia
0.773	UGGT1	Acute Lymphoblastic Leukemia			0.8	3499_77_IL17B_IL_17B	Acute Lymphoblastic Leukemia
0.723	UGT2B17	Acute Lymphoblastic Leukemia			0.746	3504_58_HAMP_LEAP_1	Acute Lymphoblastic Leukemia
0.35	ULK1	Acute Lymphoblastic Leukemia			0.543	3508_78_CCL22_MDC	Acute Lymphoblastic Leukemia
0.117	UPF3A	Acute Lymphoblastic Leukemia			0.347	3516_60_CXCL12_SDF_1	Acute Lymphoblastic Leukemia
0.311	UPK3A	Acute Lymphoblastic Leukemia			0.468	3518_54_CPB2_TAFI	Acute Lymphoblastic Leukemia
0.938	UROS	Acute Lymphoblastic Leukemia			0.428	3519_3_CCL17_TARC	Acute Lymphoblastic Leukemia
0.931	USP1	Acute Lymphoblastic Leukemia			0.803	3535_84_DKK1_DKK1	Acute Lymphoblastic Leukemia
0.713	USP12	Acute Lymphoblastic Leukemia			0.953	3554_24_ADIPOQ_Adiponectin	Acute Lymphoblastic Leukemia
0.836	USP15	Acute Lymphoblastic Leukemia			0.16	3580_25_SERPINA1_a1_Antitrypsin	Acute Lymphoblastic Leukemia
0.04	USP6	Acute Lymphoblastic Leukemia			0.598	3581_53_AHSG_a2_HS_Glycoprotein	Acute Lymphoblastic Leukemia
0.605	UTF1	Acute Lymphoblastic Leukemia			0.432	3585_54_BSG_BASI	Acute Lymphoblastic Leukemia
0.636	UTP15	Acute Lymphoblastic Leukemia			0.117	3592_4_CAMK1_CAMK1	Acute Lymphoblastic Leukemia
0.156	VAMP1	Acute Lymphoblastic Leukemia			0.924	3593_72_CASP3_Caspase_3	Acute Lymphoblastic Leukemia
0.882	VAMP5	Acute Lymphoblastic Leukemia			0.568	3600_2_CHIT1_Chitotriosidase_1	Acute Lymphoblastic Leukemia
0.61	VCAM1	Acute Lymphoblastic Leukemia			0.713	3605_77_MASP1_MASP3	Acute Lymphoblastic Leukemia
0.54	VCP	Acute Lymphoblastic Leukemia			0.956	3607_71_DKK3_DKK3	Acute Lymphoblastic Leukemia
0.676	VDR	Acute Lymphoblastic Leukemia			0.739	3616_3_GNS_GNS	Acute Lymphoblastic Leukemia
0.499	VENTX	Acute Lymphoblastic Leukemia			0.852	3617_80_HGFAC_HGFA	Acute Lymphoblastic Leukemia
0.955	VEZT	Acute Lymphoblastic Leukemia			0.562	3620_67_IL22RA1_IL22RA1	Acute Lymphoblastic Leukemia
0.971	VIPAS39	Acute Lymphoblastic Leukemia			0.589	3622_33_LGMN_LGMN	Acute Lymphoblastic Leukemia
0.564	VIPR2	Acute Lymphoblastic Leukemia			0.424	3628_3_MAP2K2_MP2K2	Acute Lymphoblastic Leukemia
0.596	VIT	Acute Lymphoblastic Leukemia			0.405	3629_60_CDC42BPB_MRCKB	Acute Lymphoblastic Leukemia
0.179	VLDLR	Acute Lymphoblastic Leukemia			0.729	3640_14_LRPAP1_RAP	Acute Lymphoblastic Leukemia
0.793	VPS26A	Acute Lymphoblastic Leukemia			0.111	3651_50_KDR_VEGF_sR2	Acute Lymphoblastic Leukemia
0.896	VPS33B	Acute Lymphoblastic Leukemia			0.788	3708_62_A2M_a2_Macroglobulin	Acute Lymphoblastic Leukemia
0.52	VPS53	Acute Lymphoblastic Leukemia			0.847	3710_49_PLG_Angiostatin	Acute Lymphoblastic Leukemia
0.38	VWF	Acute Lymphoblastic Leukemia			0.238	3727_35_PYY_PYY	Acute Lymphoblastic Leukemia
0.354	WAC	Acute Lymphoblastic Leukemia			0.503	3773_15_TEK_sTie_2	Acute Lymphoblastic Leukemia
0.915	WARS2	Acute Lymphoblastic Leukemia			0.359	3796_79_ANGPTL4_ANGL4	Acute Lymphoblastic Leukemia
0.836	WASL	Acute Lymphoblastic Leukemia			0.279	3799_11_CA3_Carbonic_anhydrase_III	Acute Lymphoblastic Leukemia
0.366	WDFY1	Acute Lymphoblastic Leukemia			0.559	3803_10_CST5_CYTD	Acute Lymphoblastic Leukemia
0.637	WDFY2	Acute Lymphoblastic Leukemia			0.368	3805_16_ESM1_Endocan	Acute Lymphoblastic Leukemia
0.07	WDFY4	Acute Lymphoblastic Leukemia			0.412	3806_55_EPHA5_EphA5	Acute Lymphoblastic Leukemia
0.041	WDR19	Acute Lymphoblastic Leukemia			0.536	3809_1_FGFR3_FGFR_3	Acute Lymphoblastic Leukemia
0.951	WDR27	Acute Lymphoblastic Leukemia			0.551	3810_50_FGR_FGR	Acute Lymphoblastic Leukemia
0.902	WDR5B	Acute Lymphoblastic Leukemia			0.393	3822_54_MAPKAPK3_MAPKAPK3	Acute Lymphoblastic Leukemia
0.427	WDR83OS	Acute Lymphoblastic Leukemia			0.219	3825_18_MAPK8_MK08	Acute Lymphoblastic Leukemia
0.687	WDR86-AS1	Acute Lymphoblastic Leukemia			0.146	3837_6_ZAP70_ZAP70	Acute Lymphoblastic Leukemia
0.999	WDR86	Acute Lymphoblastic Leukemia			0.662	3845_51_DYNLRB1_DLRB1	Acute Lymphoblastic Leukemia
0.81	WEE1	Acute Lymphoblastic Leukemia			0.454	3852_19_DNAJB1_HSP_40	Acute Lymphoblastic Leukemia
0.437	WRAP73	Acute Lymphoblastic Leukemia			0.793	3854_24_NACA_NACA	Acute Lymphoblastic Leukemia
0.926	WRB	Acute Lymphoblastic Leukemia			0.365	3855_56_PRDX1_Peroxiredoxin_1	Acute Lymphoblastic Leukemia
0.804	WTAP	Acute Lymphoblastic Leukemia			0.883	3858_5_ACP1_PPAC	Acute Lymphoblastic Leukemia
0.212	WWC1	Acute Lymphoblastic Leukemia			0.451	3873_51_TPO_TMA	Acute Lymphoblastic Leukemia
0.321	XKR3	Acute Lymphoblastic Leukemia			0.618	3887_90_KPNB1_IMB1	Acute Lymphoblastic Leukemia
0.29	XPO4	Acute Lymphoblastic Leukemia			0.579	3894_15_NAGK_NAGK	Acute Lymphoblastic Leukemia
0.804	XRCC3	Acute Lymphoblastic Leukemia			0.94	3903_49_SNX4_Sorting_nexin_4	Acute Lymphoblastic Leukemia
0.024	XRRA1	Acute Lymphoblastic Leukemia			0.985	4124_24_HSPA1A_HSP_70	Acute Lymphoblastic Leukemia
0.72	XXyac-YRM2039.2	Acute Lymphoblastic Leukemia			0.192	4125_52_AGER_sRAGE	Acute Lymphoblastic Leukemia
0.769	XYLT1	Acute Lymphoblastic Leukemia			0.716	4126_22_BPI_BPI	Acute Lymphoblastic Leukemia
0.621	Y_RNA	Acute Lymphoblastic Leukemia			0.976	4127_75_C6_C6	Acute Lymphoblastic Leukemia
0.984	YBEY	Acute Lymphoblastic Leukemia			0.436	4128_27_CCL24_Eotaxin_2	Acute Lymphoblastic Leukemia
0.379	YBX2	Acute Lymphoblastic Leukemia			0.834	4129_72_CFB_Factor_B	Acute Lymphoblastic Leukemia
0.833	YIPF3	Acute Lymphoblastic Leukemia			0.972	4141_79_CXCL10_IP_10	Acute Lymphoblastic Leukemia
0.272	YIPF5	Acute Lymphoblastic Leukemia			0.644	4143_74_XCL1_Lymphotactin	Acute Lymphoblastic Leukemia
0.89	YRDC	Acute Lymphoblastic Leukemia			0.548	4145_58_NTF3_Neurotrophin_3	Acute Lymphoblastic Leukemia
0.507	YTHDC2	Acute Lymphoblastic Leukemia			0.888	4148_49_PAPPA_PAPP_A	Acute Lymphoblastic Leukemia
0.868	ZBTB22	Acute Lymphoblastic Leukemia			0.188	4149_8_PDGFB_PDGF_BB	Acute Lymphoblastic Leukemia
0.474	ZBTB38	Acute Lymphoblastic Leukemia			0.547	4150_75_PLG_Plasmin	Acute Lymphoblastic Leukemia
0.765	ZBTB47	Acute Lymphoblastic Leukemia			0.868	4151_6_PLG_Plasminogen	Acute Lymphoblastic Leukemia
0.913	ZBTB5	Acute Lymphoblastic Leukemia			0.717	4152_58_KLKB1_Prekallikrein	Acute Lymphoblastic Leukemia
0.914	ZC2HC1A	Acute Lymphoblastic Leukemia			0.875	4153_11_SERPINA3_alpha_1_antichymotrypsin_complex	Acute Lymphoblastic Leukemia
0.069	ZCCHC14	Acute Lymphoblastic Leukemia			0.7	4154_57_SELP_P_Selectin	Acute Lymphoblastic Leukemia
0.72	ZCCHC24	Acute Lymphoblastic Leukemia			0.443	4155_3_TNC_Tenascin	Acute Lymphoblastic Leukemia
0.872	ZDHHC13	Acute Lymphoblastic Leukemia			0.883	4157_2_F2_Thrombin	Acute Lymphoblastic Leukemia
0.427	ZDHHC18	Acute Lymphoblastic Leukemia			0.252	4158_54_PLAU_uPA	Acute Lymphoblastic Leukemia
0.654	ZDHHC19	Acute Lymphoblastic Leukemia			0.708	4160_49_MMP2_MMP_2	Acute Lymphoblastic Leukemia
0.634	ZDHHC7	Acute Lymphoblastic Leukemia			0.658	4187_49_PGD_6_Phosphogluconate_dehydrogenase	Acute Lymphoblastic Leukemia
0.874	ZFHX3	Acute Lymphoblastic Leukemia			0.947	4188_1_AKR7A2_Aflatoxin_B1_aldehyde_reductase	Acute Lymphoblastic Leukemia
0.96	ZFP14	Acute Lymphoblastic Leukemia			0.301	4192_10_AKR1A1_AK1A1	Acute Lymphoblastic Leukemia
0.321	ZFP30	Acute Lymphoblastic Leukemia			0.466	4212_5_EPS15L1_EP15R	Acute Lymphoblastic Leukemia
0.915	ZFP62	Acute Lymphoblastic Leukemia			0.535	4220_39_FER_FER	Acute Lymphoblastic Leukemia
0.955	ZFP91	Acute Lymphoblastic Leukemia			0.507	4224_7_SYNCRIP_HNRPQ	Acute Lymphoblastic Leukemia
0.855	ZFR2	Acute Lymphoblastic Leukemia			0.784	4232_19_IGF1R_IGF_I_sR	Acute Lymphoblastic Leukemia
0.9	ZFYVE26	Acute Lymphoblastic Leukemia			0.265	4234_8_IL1RL1_IL_1_R4	Acute Lymphoblastic Leukemia
0.203	ZMIZ2	Acute Lymphoblastic Leukemia			0.879	4237_70_LCMT1_LCMT1	Acute Lymphoblastic Leukemia
0.972	ZMPSTE24	Acute Lymphoblastic Leukemia			0.173	4246_40_L1CAM_NCAM_L1	Acute Lymphoblastic Leukemia
0.533	ZNF121	Acute Lymphoblastic Leukemia			0.222	4258_15_PA2G4_PA2G4	Acute Lymphoblastic Leukemia
0.761	ZNF124	Acute Lymphoblastic Leukemia			0.742	4271_75_PFDN5_PFD5	Acute Lymphoblastic Leukemia
0.68	ZNF137P	Acute Lymphoblastic Leukemia			0.868	4272_46_GPI_PHI	Acute Lymphoblastic Leukemia
0.741	ZNF175	Acute Lymphoblastic Leukemia			0.225	4276_10_PEBP1_prostatic_binding_protein	Acute Lymphoblastic Leukemia
0.978	ZNF204P	Acute Lymphoblastic Leukemia			0.489	4278_14_P4HB_Protein_disulfide_isomerase	Acute Lymphoblastic Leukemia
0.997	ZNF205	Acute Lymphoblastic Leukemia			0.514	4280_47_PSMA2_PSA2	Acute Lymphoblastic Leukemia
0.934	ZNF213	Acute Lymphoblastic Leukemia			0.362	4294_16_SPHK1_Sphingosine_kinase_1	Acute Lymphoblastic Leukemia
0.096	ZNF281	Acute Lymphoblastic Leukemia			0.736	4297_62_SPON1_Spondin_1	Acute Lymphoblastic Leukemia
0.66	ZNF282	Acute Lymphoblastic Leukemia			0.37	4301_58_TK1_Thymidine_kinase	Acute Lymphoblastic Leukemia
0.868	ZNF317	Acute Lymphoblastic Leukemia			0.781	4314_12_DCTPP1_XTP3A	Acute Lymphoblastic Leukemia
0.889	ZNF318	Acute Lymphoblastic Leukemia			0.93	4324_33_CST2_CYTT	Acute Lymphoblastic Leukemia
0.706	ZNF319	Acute Lymphoblastic Leukemia			0.244	4328_2_BOC_BOC	Acute Lymphoblastic Leukemia
0.736	ZNF365	Acute Lymphoblastic Leukemia			0.853	4332_6_CLEC1B_CLC1B	Acute Lymphoblastic Leukemia
0.684	ZNF420	Acute Lymphoblastic Leukemia			0.768	4337_49_CRP_CRP	Acute Lymphoblastic Leukemia
0.665	ZNF425	Acute Lymphoblastic Leukemia			0.647	4342_10_ICAM1_sICAM_1	Acute Lymphoblastic Leukemia
0.365	ZNF429	Acute Lymphoblastic Leukemia			0.365	4355_13_DAPK2_DAPK2	Acute Lymphoblastic Leukemia
0.41	ZNF470	Acute Lymphoblastic Leukemia			0.387	4359_87_DYRK3_DYRK3	Acute Lymphoblastic Leukemia
0.236	ZNF471	Acute Lymphoblastic Leukemia			0.273	4374_45_GDF15_MIC_1	Acute Lymphoblastic Leukemia
0.319	ZNF496	Acute Lymphoblastic Leukemia			0.421	4407_10_MST1_MSP	Acute Lymphoblastic Leukemia
0.239	ZNF500	Acute Lymphoblastic Leukemia			0.453	4413_3_SLPI_SLPI	Acute Lymphoblastic Leukemia
0.895	ZNF561	Acute Lymphoblastic Leukemia			0.469	4423_77_BCL2L1_BCL2_like_1_protein	Acute Lymphoblastic Leukemia
0.924	ZNF577	Acute Lymphoblastic Leukemia			0.901	4430_44_COLEC11_Collectin_Kidney_1	Acute Lymphoblastic Leukemia
0.223	ZNF586	Acute Lymphoblastic Leukemia			0.331	4435_66_ENPP7_ENPP7	Acute Lymphoblastic Leukemia
0.119	ZNF587B	Acute Lymphoblastic Leukemia			0.39	4436_1_ENTPD3_ENTP3	Acute Lymphoblastic Leukemia
0.959	ZNF595	Acute Lymphoblastic Leukemia			0.876	4437_56_ENTPD5_ENTP5	Acute Lymphoblastic Leukemia
0.966	ZNF605	Acute Lymphoblastic Leukemia			0.333	4440_15_FCRL3_FCRL3	Acute Lymphoblastic Leukemia
0.903	ZNF606	Acute Lymphoblastic Leukemia			0.565	4453_83_LRRTM3_LRRT3	Acute Lymphoblastic Leukemia
0.294	ZNF613	Acute Lymphoblastic Leukemia			0.146	4455_89_MFGE8_MFGM	Acute Lymphoblastic Leukemia
0.589	ZNF627	Acute Lymphoblastic Leukemia			0.041	4459_68_PCSK7_PCSK7	Acute Lymphoblastic Leukemia
0.85	ZNF638	Acute Lymphoblastic Leukemia			0.536	4460_8_PDPK1_PDPK1	Acute Lymphoblastic Leukemia
0.497	ZNF667	Acute Lymphoblastic Leukemia			0.406	4467_49_SPARCL1_SPARCL1	Acute Lymphoblastic Leukemia
0.938	ZNF668	Acute Lymphoblastic Leukemia			0.114	4468_21_SPHK2_SPHK2	Acute Lymphoblastic Leukemia
0.084	ZNF670	Acute Lymphoblastic Leukemia			0.521	4469_78_CHST15_ST4S6	Acute Lymphoblastic Leukemia
0.229	ZNF677	Acute Lymphoblastic Leukemia			0.777	4471_50_TGM3_TGM3	Acute Lymphoblastic Leukemia
0.9	ZNF701	Acute Lymphoblastic Leukemia			0.221	4472_5_TPM2_Tropomyosin_2	Acute Lymphoblastic Leukemia
0.857	ZNF718	Acute Lymphoblastic Leukemia			0.53	4476_22_ZAP70_ZAP70	Acute Lymphoblastic Leukemia
0.554	ZNF767	Acute Lymphoblastic Leukemia			0.808	4479_14_SERPING1_C1_Esterase_Inhibitor	Acute Lymphoblastic Leukemia
0.157	ZNF772	Acute Lymphoblastic Leukemia			0.349	4496_60_MMP12_MMP_12	Acute Lymphoblastic Leukemia
0.362	ZNF775	Acute Lymphoblastic Leukemia			0.763	4498_62_NCAM1_NCAM_120	Acute Lymphoblastic Leukemia
0.998	ZNF79	Acute Lymphoblastic Leukemia			0.138	4499_21_PDGFA_PDGF_AA	Acute Lymphoblastic Leukemia
0.158	ZNF823	Acute Lymphoblastic Leukemia			0.887	4500_50_CLEC11A_SCGF_alpha	Acute Lymphoblastic Leukemia
0.984	ZNF84	Acute Lymphoblastic Leukemia			0.798	4534_10_PRSS22_BSSP4	Acute Lymphoblastic Leukemia
0.333	ZNF841	Acute Lymphoblastic Leukemia			0.716	4535_50_BST1_BST1	Acute Lymphoblastic Leukemia
0.687	ZNHIT3	Acute Lymphoblastic Leukemia			0.452	4540_11_CBX5_CBX5	Acute Lymphoblastic Leukemia
0.982	ZSWIM7	Acute Lymphoblastic Leukemia			0.418	4541_49_CDON_CDON	Acute Lymphoblastic Leukemia
0.992	ZYX	Acute Lymphoblastic Leukemia			0.412	4542_24_CLU_Clusterin	Acute Lymphoblastic Leukemia
0.967	ZZEF1	Acute Lymphoblastic Leukemia			0.847	4546_27_ADGRE2_EMR2	Acute Lymphoblastic Leukemia
0.804	A2M-AS1	Acute Myeloid Leukemia			0.648	4548_4_FUT3_Fucosyltransferase_3	Acute Lymphoblastic Leukemia
0.514	A4GALT	Acute Myeloid Leukemia			0.821	4549_78_FUT5_FUT5	Acute Lymphoblastic Leukemia
0.978	AATK	Acute Myeloid Leukemia			0.238	4556_10_IL34_IL_34	Acute Lymphoblastic Leukemia
0.839	ABAT	Acute Myeloid Leukemia			0.677	4559_64_KYNU_KYNU	Acute Lymphoblastic Leukemia
0.41	ABCA1	Acute Myeloid Leukemia			0.911	4562_1_NXPH1_NXPH1	Acute Lymphoblastic Leukemia
0.958	ABCA10	Acute Myeloid Leukemia			0.343	4563_61_PLCG1_PLCG1	Acute Lymphoblastic Leukemia
0.308	ABCA2	Acute Myeloid Leukemia			0.91	4564_2_PLXNC1_PLXC1	Acute Lymphoblastic Leukemia
0.972	ABCA5	Acute Myeloid Leukemia			0.346	4567_82_SH2D1A_SH21A	Acute Lymphoblastic Leukemia
0.982	ABCC4	Acute Myeloid Leukemia			0.697	4568_17_SLITRK5_SLIK5	Acute Lymphoblastic Leukemia
0.015	ABCC5	Acute Myeloid Leukemia			0.561	4569_52_SORCS2_SORC2	Acute Lymphoblastic Leukemia
0.69	ABCD2	Acute Myeloid Leukemia			0.281	4588_1_PPY_PH	Acute Lymphoblastic Leukemia
0.121	ABHD3	Acute Myeloid Leukemia			0.551	4712_28_APOD_Apo_D	Acute Lymphoblastic Leukemia
0.63	ABHD5	Acute Myeloid Leukemia			0.507	4718_5_PPIB_PPIB	Acute Lymphoblastic Leukemia
0.405	ABHD6	Acute Myeloid Leukemia			0.006	4721_54_TFF3_TFF3	Acute Lymphoblastic Leukemia
0.57	ABO	Acute Myeloid Leukemia			0.571	4763_31_AFM_Afamin	Acute Lymphoblastic Leukemia
0.983	ABP1	Acute Myeloid Leukemia			0.404	4771_10_SMPDL3A_ASM3A	Acute Lymphoblastic Leukemia
0.506	ABR	Acute Myeloid Leukemia			0.822	4775_34_GSN_Gelsolin	Acute Lymphoblastic Leukemia
0.845	AC002310.12	Acute Myeloid Leukemia			0.838	4801_13_LPO_PERL	Acute Lymphoblastic Leukemia
0.469	AC002456.2	Acute Myeloid Leukemia			0.465	4811_33_ITIH4_ITI_heavy_chain_H4	Acute Lymphoblastic Leukemia
0.842	AC004967.8	Acute Myeloid Leukemia			0.336	4831_4_SELL_sL_Selectin	Acute Lymphoblastic Leukemia
0.732	AC005224.2	Acute Myeloid Leukemia			0.326	4834_61_EPHA2_Epithelial_cell_kinase	Acute Lymphoblastic Leukemia
0.614	AC006547.14	Acute Myeloid Leukemia			0.51	4840_73_CSF3_G_CSF	Acute Lymphoblastic Leukemia
0.542	AC007950.1	Acute Myeloid Leukemia			0.651	4842_62_GPC3_Glypican_3	Acute Lymphoblastic Leukemia
0.597	AC008592.4	Acute Myeloid Leukemia			0.896	4866_59_NTRK2_TrkB	Acute Lymphoblastic Leukemia
0.733	AC009495.2	Acute Myeloid Leukemia			0.853	4867_15_VEGFA_VEGF121	Acute Lymphoblastic Leukemia
0.485	AC009961.3	Acute Myeloid Leukemia			0.054	4874_3_ANG_Angiogenin	Acute Lymphoblastic Leukemia
0.168	AC011816.1	Acute Myeloid Leukemia			0.111	4878_3_F10_Coagulation_Factor_X	Acute Lymphoblastic Leukemia
0.966	AC011893.3	Acute Myeloid Leukemia			0.863	4880_21_GDF2_GDF2	Acute Lymphoblastic Leukemia
0.53	AC013264.2	Acute Myeloid Leukemia			0.554	4886_3_CCL7_MCP_3	Acute Lymphoblastic Leukemia
0.633	AC016683.6	Acute Myeloid Leukemia			0.46	4891_50_GCG_Glucagon	Acute Lymphoblastic Leukemia
0.095	AC016757.3	Acute Myeloid Leukemia			0.142	4905_63_COTL1_Coactosin_like_protein	Acute Lymphoblastic Leukemia
0.638	AC017116.8	Acute Myeloid Leukemia			0.531	4906_35_F5_Coagulation_Factor_V	Acute Lymphoblastic Leukemia
0.871	AC021860.1	Acute Myeloid Leukemia			0.685	4908_6_ENG_Endoglin	Acute Lymphoblastic Leukemia
0.624	AC022182.3	Acute Myeloid Leukemia			0.871	4912_17_GOT1_GOT1	Acute Lymphoblastic Leukemia
0.979	AC025335.1	Acute Myeloid Leukemia			0.724	4913_78_CCL16_HCC_4	Acute Lymphoblastic Leukemia
0.155	AC026740.1	Acute Myeloid Leukemia			0.841	4920_10_LYZ_Lysozyme	Acute Lymphoblastic Leukemia
0.293	AC068039.4	Acute Myeloid Leukemia			0.47	4922_13_CCL19_MIP_3b	Acute Lymphoblastic Leukemia
0.957	AC073115.7	Acute Myeloid Leukemia			0.543	4923_79_AMH_MIS	Acute Lymphoblastic Leukemia
0.952	AC087380.14	Acute Myeloid Leukemia			0.996	4924_32_MMP1_MMP_1	Acute Lymphoblastic Leukemia
0.873	AC090804.1	Acute Myeloid Leukemia			0.258	4929_55_SHBG_SHBG	Acute Lymphoblastic Leukemia
0.903	AC091729.9	Acute Myeloid Leukemia			0.059	4930_21_STC1_Stanniocalcin_1	Acute Lymphoblastic Leukemia
0.003	AC091814.2	Acute Myeloid Leukemia			0.898	4931_59_F3_TF	Acute Lymphoblastic Leukemia
0.702	AC093323.3	Acute Myeloid Leukemia			0.597	4961_17_ANXA2_annexin_II	Acute Lymphoblastic Leukemia
0.892	AC099552.2	Acute Myeloid Leukemia			0.641	4962_52_CDNF_ARMEL	Acute Lymphoblastic Leukemia
0.722	AC104653.1	Acute Myeloid Leukemia			0.903	4964_67_ERAP1_ARTS1	Acute Lymphoblastic Leukemia
0.45	AC125232.1	Acute Myeloid Leukemia			0.392	4967_1_C1QBP_C1QBP	Acute Lymphoblastic Leukemia
0.508	AC141586.5	Acute Myeloid Leukemia			0.654	4968_50_CAPG_CAPG	Acute Lymphoblastic Leukemia
0.38	ACAA1	Acute Myeloid Leukemia			0.948	4969_2_CA1_Carbonic_anhydrase_I	Acute Lymphoblastic Leukemia
0.539	ACAA2	Acute Myeloid Leukemia			0.853	4971_1_CTSZ_CATZ	Acute Lymphoblastic Leukemia
0.761	ACACA	Acute Myeloid Leukemia			0.517	4979_34_DPT_DERM	Acute Lymphoblastic Leukemia
0.393	ACOT1	Acute Myeloid Leukemia			0.445	4982_54_PI3_Elafin	Acute Lymphoblastic Leukemia
0.955	ACTBP8	Acute Myeloid Leukemia			0.988	4987_17_FCAR_FCAR	Acute Lymphoblastic Leukemia
0.375	ADA	Acute Myeloid Leukemia			0.894	4989_7_FGG_Fibrinogen_g_chain_dimer	Acute Lymphoblastic Leukemia
0.822	ADAM19	Acute Myeloid Leukemia			0.639	4990_87_GP1BA_GP1BA	Acute Lymphoblastic Leukemia
0.154	ADAMTSL2	Acute Myeloid Leukemia			0.808	4991_12_GPC5_GPC5	Acute Lymphoblastic Leukemia
0.149	ADCY10P1	Acute Myeloid Leukemia			0.405	4992_49_GRN_GRN	Acute Lymphoblastic Leukemia
0.779	ADI1	Acute Myeloid Leukemia			0.308	4995_16_HPGD_HPG_	Acute Lymphoblastic Leukemia
0.377	ADK	Acute Myeloid Leukemia			0.577	4996_66_HRG_HRG	Acute Lymphoblastic Leukemia
0.135	ADSS	Acute Myeloid Leukemia			0.425	5000_52_LGALS3BP_LG3BP	Acute Lymphoblastic Leukemia
0.861	ADTRP	Acute Myeloid Leukemia			0.189	5002_76_MMP14_MMP_14	Acute Lymphoblastic Leukemia
0.936	AEBP1	Acute Myeloid Leukemia			0.409	5008_51_SOD2_Mn_SOD	Acute Lymphoblastic Leukemia
0.084	AF131215.2	Acute Myeloid Leukemia			0.021	5015_15_PLA2G7_PAFAH	Acute Lymphoblastic Leukemia
0.017	AF131215.9	Acute Myeloid Leukemia			0.161	5019_16_UCHL1_PGP9_5	Acute Lymphoblastic Leukemia
0.347	AFF3	Acute Myeloid Leukemia			0.477	5024_67_RB1_Rb	Acute Lymphoblastic Leukemia
0.715	AGAP4	Acute Myeloid Leukemia			0.904	5026_66_RPS3_RS3	Acute Lymphoblastic Leukemia
0.792	AGAP7	Acute Myeloid Leukemia			0.625	5028_59_CD163_sCD163	Acute Lymphoblastic Leukemia
0.191	AGER	Acute Myeloid Leukemia			0.26	5029_3_FAP_SEPR	Acute Lymphoblastic Leukemia
0.497	AHCTF1	Acute Myeloid Leukemia			0.838	5030_52_SIRT2_SIRT2	Acute Lymphoblastic Leukemia
0.811	AIF1	Acute Myeloid Leukemia			0.579	5031_10_SPTAN1_SPTA2	Acute Lymphoblastic Leukemia
0.305	AIMP2	Acute Myeloid Leukemia			0.723	5034_79_PRSS2_Trypsin_2	Acute Lymphoblastic Leukemia
0.645	AKAP10	Acute Myeloid Leukemia			0.901	5036_50_TNFAIP6_TSG_6	Acute Lymphoblastic Leukemia
0.264	AKAP11	Acute Myeloid Leukemia			0.443	5060_62_CD274_B7_H1	Acute Lymphoblastic Leukemia
0.989	AKIP1	Acute Myeloid Leukemia			0.313	5066_134_CD300C_CLM6	Acute Lymphoblastic Leukemia
0.98	AKT3	Acute Myeloid Leukemia			0.609	5069_9_CD55_DAF	Acute Lymphoblastic Leukemia
0.755	AKTIP	Acute Myeloid Leukemia			0.553	5078_82_EPHB6_EphB6	Acute Lymphoblastic Leukemia
0.428	ALDH3A2	Acute Myeloid Leukemia			0.278	5087_5_IL22RA2_IL_22BP	Acute Lymphoblastic Leukemia
0.614	ALDH7A1	Acute Myeloid Leukemia			0.496	5088_175_IL23R_IL_23_R	Acute Lymphoblastic Leukemia
0.928	ALDH8A1	Acute Myeloid Leukemia			0.662	5089_11_IL7R_IL_7_Ra	Acute Lymphoblastic Leukemia
0.769	ALDOC	Acute Myeloid Leukemia			0.704	5090_49_LILRB1_ILT_2	Acute Lymphoblastic Leukemia
0.948	ALG11	Acute Myeloid Leukemia			0.283	5091_28_LILRB2_ILT_4	Acute Lymphoblastic Leukemia
0.906	ALG1L10P	Acute Myeloid Leukemia			0.294	5092_51_JAG1_JAG1	Acute Lymphoblastic Leukemia
0.743	ALG8	Acute Myeloid Leukemia			0.893	5095_21_KIR2DL4_KI2L4	Acute Lymphoblastic Leukemia
0.747	ALKBH1	Acute Myeloid Leukemia			0.654	5098_79_KLRF1_KLRF1	Acute Lymphoblastic Leukemia
0.892	ALOX5AP	Acute Myeloid Leukemia			0.403	5102_55_MICB_MICB	Acute Lymphoblastic Leukemia
0.852	AMDHD1	Acute Myeloid Leukemia			0.665	5103_30_CD200R1_MO2R1	Acute Lymphoblastic Leukemia
0.725	AMDHD2	Acute Myeloid Leukemia			0.413	5105_2_RTN4R_Nogo_Receptor	Acute Lymphoblastic Leukemia
1	AMFR	Acute Myeloid Leukemia			0.54	5107_7_NOTCH1_Notch_1	Acute Lymphoblastic Leukemia
0.804	AMIGO1	Acute Myeloid Leukemia			0.77	5108_72_NOTCH3_Notch_3	Acute Lymphoblastic Leukemia
0.993	AMT	Acute Myeloid Leukemia			0.982	5109_24_NRCAM_Nr_CAM	Acute Lymphoblastic Leukemia
0.572	AMZ2	Acute Myeloid Leukemia			0.819	5111_15_NRXN3_NRX3B	Acute Lymphoblastic Leukemia
0.06	ANAPC13	Acute Myeloid Leukemia			0.433	5112_73_CD200_OX2G	Acute Lymphoblastic Leukemia
0.954	ANGEL1	Acute Myeloid Leukemia			0.194	5114_65_PRLR_Prolactin_Receptor	Acute Lymphoblastic Leukemia
0.729	ANGEL2	Acute Myeloid Leukemia			0.576	5116_62_ROBO2_ROBO2	Acute Lymphoblastic Leukemia
0.563	ANGPTL6	Acute Myeloid Leukemia			0.911	5121_3_SEMA6B_SEM6B	Acute Lymphoblastic Leukemia
0.84	ANK3	Acute Myeloid Leukemia			0.987	5124_69_ICAM5_sICAM_5	Acute Lymphoblastic Leukemia
0.002	ANKDD1A	Acute Myeloid Leukemia			0.545	5129_12_SCARF1_SREC_I	Acute Lymphoblastic Leukemia
0.224	ANKRD27	Acute Myeloid Leukemia			0.999	5132_71_IL27RA_TCCR	Acute Lymphoblastic Leukemia
0.712	ANKRD6	Acute Myeloid Leukemia			0.475	5134_52_HAVCR2_TIMD3	Acute Lymphoblastic Leukemia
0.796	ANKS6	Acute Myeloid Leukemia			0.537	5202_4_PPID_PPID	Acute Lymphoblastic Leukemia
0.659	ANKZF1	Acute Myeloid Leukemia			0.564	5223_59_GCKR_GCKR	Acute Lymphoblastic Leukemia
0.382	ANTXRLP1	Acute Myeloid Leukemia			0.036	5227_60_PDK1_PDK1	Acute Lymphoblastic Leukemia
0.838	ANXA11	Acute Myeloid Leukemia			0.465	5229_90_IMPDH1_IMDH1	Acute Lymphoblastic Leukemia
0.449	ANXA3	Acute Myeloid Leukemia			0.282	5231_79_PCSK9_PCSK9	Acute Lymphoblastic Leukemia
0.994	ANXA5	Acute Myeloid Leukemia			0.872	5236_2_NR1D1_NR1D1	Acute Lymphoblastic Leukemia
0.971	AP001007.1	Acute Myeloid Leukemia			0.388	5238_26_PPIE_PPIE	Acute Lymphoblastic Leukemia
0.952	AP001046.5	Acute Myeloid Leukemia			0.431	5242_37_MAP2K4_MP2K4	Acute Lymphoblastic Leukemia
0.318	AP001062.7	Acute Myeloid Leukemia			0.656	5250_53_IMPDH2_IMDH2	Acute Lymphoblastic Leukemia
0.192	AP002954.4	Acute Myeloid Leukemia			0.924	5252_33_PDE11A_PDE11	Acute Lymphoblastic Leukemia
0.064	AP003774.1	Acute Myeloid Leukemia			0.238	5255_22_PDE4D_PDE4D	Acute Lymphoblastic Leukemia
0.709	AP006621.1	Acute Myeloid Leukemia			0.241	5256_86_PDE5A_PDE5A	Acute Lymphoblastic Leukemia
0.285	AP006621.5	Acute Myeloid Leukemia			0.54	5262_57_BCAR3_BCAR3	Acute Lymphoblastic Leukemia
0.727	AP1M1	Acute Myeloid Leukemia			0.54	5272_55_SHC1_SHC1	Acute Lymphoblastic Leukemia
0.604	AP3M1	Acute Myeloid Leukemia			0.533	5301_7_CCL11_Eotaxin	Acute Lymphoblastic Leukemia
0.302	AP3M2	Acute Myeloid Leukemia			0.451	5316_54_F2_Prothrombin	Acute Lymphoblastic Leukemia
0.887	AP4M1	Acute Myeloid Leukemia			0.198	5335_73_ANXA6_annexin_VI	Acute Lymphoblastic Leukemia
0.614	API5	Acute Myeloid Leukemia			0.401	5337_64_CD86_B7_2	Acute Lymphoblastic Leukemia
0.449	APOBEC3C	Acute Myeloid Leukemia			0.514	5343_74_CPE_CBPE	Acute Lymphoblastic Leukemia
0.552	APOL2	Acute Myeloid Leukemia			0.04	5345_51_CKAP2_CKAP2	Acute Lymphoblastic Leukemia
0.437	APOLD1	Acute Myeloid Leukemia			0.302	5346_24_CPNE1_CPNE1	Acute Lymphoblastic Leukemia
0.339	ARC	Acute Myeloid Leukemia			0.887	5349_69_DLL1_DLL1	Acute Lymphoblastic Leukemia
0.844	ARHGAP27	Acute Myeloid Leukemia			0.07	5350_14_GPC6_GPC6	Acute Lymphoblastic Leukemia
0.445	ARHGAP9	Acute Myeloid Leukemia			0.565	5353_89_IL1RN_IL_1Ra	Acute Lymphoblastic Leukemia
0.722	ARHGDIB	Acute Myeloid Leukemia			0.128	5358_3_OMD_OMD	Acute Lymphoblastic Leukemia
0.929	ARHGEF35	Acute Myeloid Leukemia			0.497	5359_65_PIM1_PIM1	Acute Lymphoblastic Leukemia
0.656	ARID1A	Acute Myeloid Leukemia			0.983	5363_51_SEMA3E_Semaphorin_3E	Acute Lymphoblastic Leukemia
0.971	ARIH2	Acute Myeloid Leukemia			0.289	5383_14_TNFRSF13C_BAFF_Receptor	Acute Lymphoblastic Leukemia
0.574	ARL8B	Acute Myeloid Leukemia			0.449	5392_73_FAS_Fas__soluble	Acute Lymphoblastic Leukemia
0.657	ARMC2	Acute Myeloid Leukemia			0.639	5400_52_LEPR_sLeptin_R	Acute Lymphoblastic Leukemia
0.536	ARMC3	Acute Myeloid Leukemia			0.835	5404_53_TNFRSF21_DR6	Acute Lymphoblastic Leukemia
0.364	ARNTL	Acute Myeloid Leukemia			0.526	5410_53_CDH15_CAD15	Acute Lymphoblastic Leukemia
0.988	ARPP19	Acute Myeloid Leukemia			0.919	5412_53_CD27_CD27	Acute Lymphoblastic Leukemia
0.358	ARRDC2	Acute Myeloid Leukemia			0.393	5430_66_SIRPA_SHPS1	Acute Lymphoblastic Leukemia
0.815	AS3MT	Acute Myeloid Leukemia			0.276	5437_63_FABP3_FABP	Acute Lymphoblastic Leukemia
0.552	ASB1	Acute Myeloid Leukemia			0.542	5440_26_TNNI2_Troponin_I__skeletal__fast_twitch	Acute Lymphoblastic Leukemia
0.594	ASB13	Acute Myeloid Leukemia			0.542	5443_62_NPPA_ANP	Acute Lymphoblastic Leukemia
0.775	ATF3	Acute Myeloid Leukemia			0.924	5451_1_ALCAM_ALCAM	Acute Lymphoblastic Leukemia
0.894	ATG12	Acute Myeloid Leukemia			0.431	5452_71_ASGR1_ASGR1	Acute Lymphoblastic Leukemia
0.35	ATHL1	Acute Myeloid Leukemia			0.702	5456_59_CNDP1_CNDP1	Acute Lymphoblastic Leukemia
0.523	ATP10D	Acute Myeloid Leukemia			0.864	5457_5_COLEC12_COLEC12	Acute Lymphoblastic Leukemia
0.867	ATP13A3	Acute Myeloid Leukemia			0.884	5459_33_CST1_CYTN	Acute Lymphoblastic Leukemia
0.345	ATP1B2	Acute Myeloid Leukemia			0.83	5462_62_FCN3_Ficolin_3	Acute Lymphoblastic Leukemia
0.803	ATP2A3	Acute Myeloid Leukemia			0.771	5463_22_GAS1_GAS1	Acute Lymphoblastic Leukemia
0.947	ATP6V1E1	Acute Myeloid Leukemia			0.913	5465_32_HS6ST1_H6ST1	Acute Lymphoblastic Leukemia
0.948	ATP9A	Acute Myeloid Leukemia			0.346	5478_50_FOLH1_PSMA	Acute Lymphoblastic Leukemia
0.625	ATP9B	Acute Myeloid Leukemia			0.146	5480_49_CCL5_RANTES	Acute Lymphoblastic Leukemia
0.533	ATPAF2	Acute Myeloid Leukemia			0.889	5483_1_RGMA_RGMA	Acute Lymphoblastic Leukemia
0.781	ATRAID	Acute Myeloid Leukemia			0.87	5486_73_ICAM2_sICAM_2	Acute Lymphoblastic Leukemia
0.804	ATXN7L3B	Acute Myeloid Leukemia			0.636	5487_7_SLAMF7_SLAF7	Acute Lymphoblastic Leukemia
0.07	BACH2	Acute Myeloid Leukemia			0.619	5491_12_SPOCK2_Testican_2	Acute Lymphoblastic Leukemia
0.343	BAG6	Acute Myeloid Leukemia			0.28	5494_52_SNRPF_RUXF	Acute Lymphoblastic Leukemia
0.318	BAIAP2-AS1	Acute Myeloid Leukemia			0.863	5508_62_CTSD_Cathepsin_D	Acute Lymphoblastic Leukemia
0.411	BAIAP2	Acute Myeloid Leukemia			0.6	5509_7_EGF_EGF	Acute Lymphoblastic Leukemia
0.68	BAK1	Acute Myeloid Leukemia			0.702	5526_53_TNFRSF18_GITR	Acute Lymphoblastic Leukemia
0.346	BANP	Acute Myeloid Leukemia			0.637	5532_53_FGFR1_bFGF_R	Acute Lymphoblastic Leukemia
0.715	BASP1	Acute Myeloid Leukemia			0.337	5542_22_NRP1_NRP1	Acute Lymphoblastic Leukemia
0.778	BCL9	Acute Myeloid Leukemia			0.587	5581_28_FGL1_FGL1	Acute Lymphoblastic Leukemia
0.904	BDH1	Acute Myeloid Leukemia			0.915	5584_21_TCN2_Holo_TC_II	Acute Lymphoblastic Leukemia
0.057	BICD2	Acute Myeloid Leukemia			0.191	5586_66_MINPP1_MINP1	Acute Lymphoblastic Leukemia
0.75	BIN2	Acute Myeloid Leukemia			0.951	5593_11_PDIA5_PDIA5	Acute Lymphoblastic Leukemia
0.007	BLK	Acute Myeloid Leukemia			0.749	5596_75_CD5_CD5	Acute Lymphoblastic Leukemia
0.708	BLMH	Acute Myeloid Leukemia			0.696	5598_3_GREM2_GREM2	Acute Lymphoblastic Leukemia
0.98	BMP1	Acute Myeloid Leukemia			0.769	5601_2_PGLYRP2_PGRP_L	Acute Lymphoblastic Leukemia
0.652	BMS1	Acute Myeloid Leukemia			0.211	5602_62_RNASE10_RNS10	Acute Lymphoblastic Leukemia
0.945	BPI	Acute Myeloid Leukemia			0.973	5604_30_HPSE_HPSE	Acute Lymphoblastic Leukemia
0.782	BRAT1	Acute Myeloid Leukemia			0.358	5617_41_NPFF_NPFF	Acute Lymphoblastic Leukemia
0.494	BRCA2	Acute Myeloid Leukemia			0.61	5618_50_FAM3B_FAM3B	Acute Lymphoblastic Leukemia
0.622	BRD7	Acute Myeloid Leukemia			0.384	5620_13_PAM_AMD	Acute Lymphoblastic Leukemia
0.948	BRI3	Acute Myeloid Leukemia			0.428	5621_64_THSD1_THSD1	Acute Lymphoblastic Leukemia
0.512	BRPF3	Acute Myeloid Leukemia			0.287	5626_20_CTRC_CTRC	Acute Lymphoblastic Leukemia
0.332	BTBD7	Acute Myeloid Leukemia			0.637	5627_53_GNRH1_GON1	Acute Lymphoblastic Leukemia
0.423	C10orf128	Acute Myeloid Leukemia			0.675	5628_21_SEMA3G_SEM3G	Acute Lymphoblastic Leukemia
0.396	C10orf68	Acute Myeloid Leukemia			0.659	5630_48_CD300A_CM35H	Acute Lymphoblastic Leukemia
0.919	C10orf88	Acute Myeloid Leukemia			0.063	5631_83_MLN_MOTI	Acute Lymphoblastic Leukemia
0.527	C11orf54	Acute Myeloid Leukemia			0.429	5632_6_CRTAC1_CRAC1	Acute Lymphoblastic Leukemia
0.662	C11orf63	Acute Myeloid Leukemia			0.823	5634_39_POFUT1_OFUT1	Acute Lymphoblastic Leukemia
0.45	C12orf76	Acute Myeloid Leukemia			0.007	5636_10_MFAP4_MFAP4	Acute Lymphoblastic Leukemia
0.961	C14orf2	Acute Myeloid Leukemia			0.955	5637_81_NTNG1_NTNG1	Acute Lymphoblastic Leukemia
0.427	C14orf64	Acute Myeloid Leukemia			0.048	5638_23_COLGALT1_GT251	Acute Lymphoblastic Leukemia
0.873	C15orf38	Acute Myeloid Leukemia			0.491	5639_49_NETO1_NETO1	Acute Lymphoblastic Leukemia
0.873	C15orf57	Acute Myeloid Leukemia			0.4	5644_60_RNASE4_RNAS4	Acute Lymphoblastic Leukemia
0.924	C16orf58	Acute Myeloid Leukemia			0.307	5646_20_RNASE6_RNAS6	Acute Lymphoblastic Leukemia
0.706	C16orf80	Acute Myeloid Leukemia			0.532	5648_28_CTRB2_CTRB2	Acute Lymphoblastic Leukemia
0.223	C17orf103	Acute Myeloid Leukemia			0.032	5649_83_PSG4_PSG4	Acute Lymphoblastic Leukemia
0.606	C17orf66	Acute Myeloid Leukemia			0.083	5654_70_TMX3_TMX3	Acute Lymphoblastic Leukemia
0.305	C17orf75	Acute Myeloid Leukemia			0.822	5657_28_ST3GAL1_SIA4A	Acute Lymphoblastic Leukemia
0.75	C17orf76-AS1	Acute Myeloid Leukemia			0.729	5658_64_F13B_coagulation_factor_XIII_B	Acute Lymphoblastic Leukemia
0.178	C17orf80	Acute Myeloid Leukemia			0.841	5660_51_SOD3_SOD3	Acute Lymphoblastic Leukemia
0.609	C17orf97	Acute Myeloid Leukemia			0.958	5663_18_PF4V1_PF4V	Acute Lymphoblastic Leukemia
0.888	C18orf54	Acute Myeloid Leukemia			0.323	5671_1_CTRB1_Chymotrypsin	Acute Lymphoblastic Leukemia
0.752	C19orf12	Acute Myeloid Leukemia			0.754	5676_54_ASIP_ASIP	Acute Lymphoblastic Leukemia
0.969	C19orf40	Acute Myeloid Leukemia			0.397	5680_54_OBP2B_OBP2B	Acute Lymphoblastic Leukemia
0.615	C19orf44	Acute Myeloid Leukemia			0.63	5682_13_VASN_VASN	Acute Lymphoblastic Leukemia
0.122	C19orf60	Acute Myeloid Leukemia			0.341	5687_5_PRKCSH_GLU2B	Acute Lymphoblastic Leukemia
0.199	C19orf66	Acute Myeloid Leukemia			0.298	5688_65_CBLN4_CBLN4	Acute Lymphoblastic Leukemia
0.457	C1orf145	Acute Myeloid Leukemia			0.886	5689_1_DEFB112_DB112	Acute Lymphoblastic Leukemia
0.852	C1orf174	Acute Myeloid Leukemia			0.152	5691_2_CRISPLD2_CRLD2	Acute Lymphoblastic Leukemia
0.533	C1orf21	Acute Myeloid Leukemia			0.7	5698_60_TNXB_Tenascin_X	Acute Lymphoblastic Leukemia
0.663	C1QB	Acute Myeloid Leukemia			0.596	5701_81_CLEC3B_Tetranectin	Acute Lymphoblastic Leukemia
0.723	C1QTNF6	Acute Myeloid Leukemia			0.315	5703_26_OLFM1_NOE1	Acute Lymphoblastic Leukemia
0.681	C1RL-AS1	Acute Myeloid Leukemia			0.372	5708_1_LEAP2_LEAP2	Acute Lymphoblastic Leukemia
0.32	C20orf24	Acute Myeloid Leukemia			0.984	5713_9_IFNL3_IFN_lambda_3	Acute Lymphoblastic Leukemia
0.632	C20orf27	Acute Myeloid Leukemia			0.324	5716_49_CSAG1_CSAG1	Acute Lymphoblastic Leukemia
0.517	C22orf29	Acute Myeloid Leukemia			0.633	5722_78_PRCP_Prolylcarboxypeptidase	Acute Lymphoblastic Leukemia
0.461	C22orf32	Acute Myeloid Leukemia			0.237	5723_4_INSL3_INSL3	Acute Lymphoblastic Leukemia
0.841	C2orf15	Acute Myeloid Leukemia			0.463	5726_49_SPAG11A_SG11A	Acute Lymphoblastic Leukemia
0.963	C3orf38	Acute Myeloid Leukemia			0.109	5728_60_FCRL1_FCRL1	Acute Lymphoblastic Leukemia
0.69	C4A	Acute Myeloid Leukemia			0.651	5731_1_SPINK6_ISK6	Acute Lymphoblastic Leukemia
0.094	C4B	Acute Myeloid Leukemia			0.654	5735_54_C1GALT1C1_C1GLC	Acute Lymphoblastic Leukemia
0.608	C4orf21	Acute Myeloid Leukemia			0.688	5736_1_TREML2_TRML2	Acute Lymphoblastic Leukemia
0.839	C4orf33	Acute Myeloid Leukemia			0.811	5737_61_SEMA4D_SEM4D	Acute Lymphoblastic Leukemia
0.603	C5	Acute Myeloid Leukemia			0.217	5739_75_KRTDAP_KTDAP	Acute Lymphoblastic Leukemia
0.436	C5orf55	Acute Myeloid Leukemia			0.689	5740_17_ROBO1_ROBO1	Acute Lymphoblastic Leukemia
0.972	C6orf211	Acute Myeloid Leukemia			0.514	5742_14_ACP6_PPA6	Acute Lymphoblastic Leukemia
0.744	C6orf48	Acute Myeloid Leukemia			0.451	5745_64_PI15_PI15	Acute Lymphoblastic Leukemia
0.998	C7orf43	Acute Myeloid Leukemia			0.56	5748_20_ASAH1_Acid_ceramidase	Acute Lymphoblastic Leukemia
0.671	C8orf40	Acute Myeloid Leukemia			0.447	5749_53_CLPS_COL	Acute Lymphoblastic Leukemia
0.575	C9orf156	Acute Myeloid Leukemia			0.429	5758_49_KLK9_kallikrein_9	Acute Lymphoblastic Leukemia
0.734	C9orf174	Acute Myeloid Leukemia			0.605	5762_35_SPAG11B_Sperm_associated_antigen_11	Acute Lymphoblastic Leukemia
0.556	CAB39L	Acute Myeloid Leukemia			0.861	5763_67_DEFB104A_HBD_4	Acute Lymphoblastic Leukemia
0.346	CABP5	Acute Myeloid Leukemia			0.339	5810_25_TDGF1_Cripto	Acute Lymphoblastic Leukemia
0.322	CACNA1H	Acute Myeloid Leukemia			0.48	5813_58_EPO_Epo	Acute Lymphoblastic Leukemia
0.465	CACUL1	Acute Myeloid Leukemia			0.116	5825_49_IFNGR1_IFN_g_R1	Acute Lymphoblastic Leukemia
0.632	CAMK1D	Acute Myeloid Leukemia			0.764	5834_18_IL9_IL_9	Acute Lymphoblastic Leukemia
0.668	CAMK2N1	Acute Myeloid Leukemia			0.203	5837_49_LIFR_LIF_sR	Acute Lymphoblastic Leukemia
0.613	CAMTA1	Acute Myeloid Leukemia			0.143	5843_60_EHMT2_NG36	Acute Lymphoblastic Leukemia
0.505	CAPG	Acute Myeloid Leukemia			0.574	5852_6_S100A12_S100A12	Acute Lymphoblastic Leukemia
0.714	CAPNS1	Acute Myeloid Leukemia			0.458	5861_78_HAAO_3HAO	Acute Lymphoblastic Leukemia
0.461	CAPRIN2	Acute Myeloid Leukemia			0.284	5867_60_ARG1_ARGI1	Acute Lymphoblastic Leukemia
0.209	CARD9	Acute Myeloid Leukemia			0.874	5879_51_DCTN2_Dynactin_subunit_2	Acute Lymphoblastic Leukemia
0.991	CARM1	Acute Myeloid Leukemia			0.404	5939_42_TNFSF12_TWEAK	Acute Lymphoblastic Leukemia
0.933	CASP3	Acute Myeloid Leukemia			0.627	5947_90_THPO_Tpo	Acute Lymphoblastic Leukemia
0.781	CASP9	Acute Myeloid Leukemia			0.508	5957_30_SST_Somatostatin_28	Acute Lymphoblastic Leukemia
0.571	CAT	Acute Myeloid Leukemia			0.114	5963_9_DMKN_Dermokine	Acute Lymphoblastic Leukemia
0.9	CATSPER2	Acute Myeloid Leukemia			0.505	5988_49_TNFSF14_LIGHT	Acute Lymphoblastic Leukemia
0.874	CBR3	Acute Myeloid Leukemia			0.185	6020_52_UTS2_Urotensin_II	Acute Lymphoblastic Leukemia
0.948	CCDC101	Acute Myeloid Leukemia			0.607	6022_57_NELL2_NELL2	Acute Lymphoblastic Leukemia
0.595	CCDC112	Acute Myeloid Leukemia			0.549	6039_24_CRHBP_CRHBP	Acute Lymphoblastic Leukemia
0.616	CCDC115	Acute Myeloid Leukemia			0.902	6049_64_PTPRS_PTPRS	Acute Lymphoblastic Leukemia
0.556	CCDC13-AS1	Acute Myeloid Leukemia			0.316	6054_6_NXPH3_NXPH3	Acute Lymphoblastic Leukemia
0.711	CCDC13	Acute Myeloid Leukemia			0.49	6060_2_PIP_PIP	Acute Lymphoblastic Leukemia
0.513	CCDC17	Acute Myeloid Leukemia			0.552	6064_4_ERP44_TXNDC4	Acute Lymphoblastic Leukemia
0.989	CCDC23	Acute Myeloid Leukemia			0.658	6081_52_PCOLCE2_PCOC2	Acute Lymphoblastic Leukemia
0.915	CCDC6	Acute Myeloid Leukemia			0.249	6086_15_CHRDL2_CRDL2	Acute Lymphoblastic Leukemia
0.225	CCDC7	Acute Myeloid Leukemia			0.427	6107_3_CELA1_ELA1	Acute Lymphoblastic Leukemia
0.887	CCDC71	Acute Myeloid Leukemia			0.445	6123_69_TP53_p53	Acute Lymphoblastic Leukemia
0.955	CCNT2	Acute Myeloid Leukemia			0.466	6151_18_MAP2K3_MP2K3	Acute Lymphoblastic Leukemia
0.987	CCR4	Acute Myeloid Leukemia			0.219	6168_11_TP53_p53_R175H	Acute Lymphoblastic Leukemia
0.41	CD151	Acute Myeloid Leukemia			0.954	6207_10_PSAP_prosaposin	Acute Lymphoblastic Leukemia
0.388	CD163	Acute Myeloid Leukemia			0.453	6210_100_IFNA5_IFNA5	Acute Lymphoblastic Leukemia
0.293	CD180	Acute Myeloid Leukemia			0.181	6213_10_CGB2_CGB2	Acute Lymphoblastic Leukemia
0.765	CD1A	Acute Myeloid Leukemia			0.554	6223_5_GUCA2B_GUC2B	Acute Lymphoblastic Leukemia
0.611	CD1B	Acute Myeloid Leukemia			0.483	6227_1_KLK10_kallikrein_10	Acute Lymphoblastic Leukemia
0.409	CD1D	Acute Myeloid Leukemia			0.452	6234_74_VIT_VITRN	Acute Lymphoblastic Leukemia
0.505	CD1E	Acute Myeloid Leukemia			0.82	6247_9_SIRPB1_SIRB1	Acute Lymphoblastic Leukemia
0.919	CD300E	Acute Myeloid Leukemia			0.253	6252_62_SCGB3A1_Secretoglobin_family_3A_member_1	Acute Lymphoblastic Leukemia
0.735	CD33	Acute Myeloid Leukemia			0.59	6255_74_CPXM1_CPXM1	Acute Lymphoblastic Leukemia
0.972	CD37	Acute Myeloid Leukemia			0.11	6257_56_CGREF1_CGRE1	Acute Lymphoblastic Leukemia
0.604	CD3D	Acute Myeloid Leukemia			0.729	6276_16_FURIN_Furin	Acute Lymphoblastic Leukemia
0.786	CD3E	Acute Myeloid Leukemia			0.465	6283_60_MCEMP1_MCEM1	Acute Lymphoblastic Leukemia
0.707	CD53	Acute Myeloid Leukemia			0.112	6289_78_ARHGAP36_RHG36	Acute Lymphoblastic Leukemia
0.475	CD63	Acute Myeloid Leukemia			0.573	6304_8_C1QTNF1_C1QT1	Acute Lymphoblastic Leukemia
0.517	CD7	Acute Myeloid Leukemia			0.184	6321_65_PCDHGA10_PCDGA	Acute Lymphoblastic Leukemia
0.726	CD86	Acute Myeloid Leukemia			0.168	6326_20_BMP4_BMP_4	Acute Lymphoblastic Leukemia
0.116	CD93	Acute Myeloid Leukemia			0.452	6342_10_NPNT_Nephronectin	Acute Lymphoblastic Leukemia
0.538	CD96	Acute Myeloid Leukemia			0.058	6354_13_HEPHL1_HPHL1	Acute Lymphoblastic Leukemia
0.349	CDC123	Acute Myeloid Leukemia			0.979	6359_50_POMGNT2_AGO61	Acute Lymphoblastic Leukemia
0.322	CDC14A	Acute Myeloid Leukemia			0.908	6364_7_TAPBPL_TPSNR	Acute Lymphoblastic Leukemia
0.358	CDC26	Acute Myeloid Leukemia			0.822	6366_38_TXNDC15_TXD15	Acute Lymphoblastic Leukemia
0.938	CDC37	Acute Myeloid Leukemia			0.385	6367_66_FMOD_fibromodulin	Acute Lymphoblastic Leukemia
0.786	CDC42SE1	Acute Myeloid Leukemia			0.623	6369_82_DEAF1_DEAF1	Acute Lymphoblastic Leukemia
0.689	CDH13	Acute Myeloid Leukemia			0.326	6372_7_YBX2_YBOX2	Acute Lymphoblastic Leukemia
0.021	CDH2	Acute Myeloid Leukemia			0.394	6373_54_SEMG2_SEMG2	Acute Lymphoblastic Leukemia
0.906	CDK10	Acute Myeloid Leukemia			0.673	6375_75_XXYLT1_XXLT1	Acute Lymphoblastic Leukemia
0.709	CDK11B	Acute Myeloid Leukemia			0.264	6377_54_LYZL2_LYZL2	Acute Lymphoblastic Leukemia
0.926	CDK5RAP2	Acute Myeloid Leukemia			0.115	6379_62_ADAMTSL2_ATL2	Acute Lymphoblastic Leukemia
0.817	CDKAL1	Acute Myeloid Leukemia			0.453	6382_17_MANBA_MANBA	Acute Lymphoblastic Leukemia
0.151	CDKL1	Acute Myeloid Leukemia			0.834	6383_90_TLL1_TLL1	Acute Lymphoblastic Leukemia
0.338	CECR6	Acute Myeloid Leukemia			0.909	6385_63_VWA1_VWA1	Acute Lymphoblastic Leukemia
0.633	CECR7	Acute Myeloid Leukemia			0.14	6388_21_CCDC126_CC126	Acute Lymphoblastic Leukemia
0.081	CEP63	Acute Myeloid Leukemia			0.391	6390_18_NPS_NPS	Acute Lymphoblastic Leukemia
0.555	CEP70	Acute Myeloid Leukemia			0.565	6393_63_HSP90B1_Endoplasmin	Acute Lymphoblastic Leukemia
0.638	CEP85	Acute Myeloid Leukemia			0.304	6395_58_GPHA2_GPHA2	Acute Lymphoblastic Leukemia
0.438	CERS5	Acute Myeloid Leukemia			0.685	6400_33_TP53I13_P5I13	Acute Lymphoblastic Leukemia
0.74	CFLAR	Acute Myeloid Leukemia			0.49	6402_8_PILRA_PILRA_isoform_FDF03_deltaTM	Acute Lymphoblastic Leukemia
0.329	CHAF1A	Acute Myeloid Leukemia			0.299	6404_20_C1QL1_C1QRF	Acute Lymphoblastic Leukemia
0.298	CHD7	Acute Myeloid Leukemia			0.537	6405_74_PSG2_PSG2	Acute Lymphoblastic Leukemia
0.564	CHKB	Acute Myeloid Leukemia			0.713	6408_2_INHBC_INHBC	Acute Lymphoblastic Leukemia
0.413	CHN1	Acute Myeloid Leukemia			0.542	6409_57_ADGRF5_GP116	Acute Lymphoblastic Leukemia
0.795	CHPT1	Acute Myeloid Leukemia			0.277	6411_58_DEFB135_DB135	Acute Lymphoblastic Leukemia
0.508	CHRFAM7A	Acute Myeloid Leukemia			0.87	6414_8_OAF_OAF	Acute Lymphoblastic Leukemia
0.869	CHRNB1	Acute Myeloid Leukemia			0.242	6415_90_CPN2_CPN2	Acute Lymphoblastic Leukemia
0.628	CIB2	Acute Myeloid Leukemia			0.136	6416_8_GKN2_GKN2	Acute Lymphoblastic Leukemia
0.335	CINP	Acute Myeloid Leukemia			0.532	6421_52_IFNA16_IFN16	Acute Lymphoblastic Leukemia
0.941	CITED4	Acute Myeloid Leukemia			0.921	6425_87_MMP19_MMP19	Acute Lymphoblastic Leukemia
0.005	CKAP2	Acute Myeloid Leukemia			0.597	6431_68_PCYOX1_PCYOX	Acute Lymphoblastic Leukemia
0.925	CKM	Acute Myeloid Leukemia			0.37	6433_57_FAM20A_FA20A	Acute Lymphoblastic Leukemia
0.166	CLDN5	Acute Myeloid Leukemia			0.438	6439_59_C14orf93_CN093	Acute Lymphoblastic Leukemia
0.044	CLEC12A	Acute Myeloid Leukemia			0.823	6440_31_MFAP5_MFAP5	Acute Lymphoblastic Leukemia
0.012	CLEC12B	Acute Myeloid Leukemia			0.651	6444_15_PSG3_PSG3	Acute Lymphoblastic Leukemia
0.229	CLEC1B	Acute Myeloid Leukemia			0.349	6447_73_PTX3_PTX3	Acute Lymphoblastic Leukemia
0.905	CLEC5A	Acute Myeloid Leukemia			0.977	6448_36_SEMA3C_Sema_E	Acute Lymphoblastic Leukemia
0.024	CLECL1	Acute Myeloid Leukemia			0.709	6451_64_ASPN_ASPN	Acute Lymphoblastic Leukemia
0.787	CLIC6	Acute Myeloid Leukemia			0.849	6453_70_LILRB4_LIRB4	Acute Lymphoblastic Leukemia
0.907	CLOCK	Acute Myeloid Leukemia			0.948	6457_50_PCDHGA1_PCDG1	Acute Lymphoblastic Leukemia
0.773	CLTB	Acute Myeloid Leukemia			0.785	6458_6_RPN1_RPN1	Acute Lymphoblastic Leukemia
0.996	CLYBL	Acute Myeloid Leukemia			0.252	6461_54_APOC3_Apo_C_III	Acute Lymphoblastic Leukemia
0.704	CMKLR1	Acute Myeloid Leukemia			0.714	6462_12_TIMP4_TIMP_4	Acute Lymphoblastic Leukemia
0.895	CNR1	Acute Myeloid Leukemia			0.393	6463_59_QRFP_OX26	Acute Lymphoblastic Leukemia
0.789	CNTLN	Acute Myeloid Leukemia			0.938	6467_65_POGLUT1_KTEL1	Acute Lymphoblastic Leukemia
0.928	CNTRL	Acute Myeloid Leukemia			0.567	6468_37_TAC4_TKN4	Acute Lymphoblastic Leukemia
0.852	COA6	Acute Myeloid Leukemia			0.229	6470_19_FBLN1_fibulin_1	Acute Lymphoblastic Leukemia
0.147	COG1	Acute Myeloid Leukemia			0.692	6471_53_CFHR4_FHR4	Acute Lymphoblastic Leukemia
0.687	COLEC12	Acute Myeloid Leukemia			0.506	6472_40_PMEL_GP100	Acute Lymphoblastic Leukemia
0.499	COLQ	Acute Myeloid Leukemia			0.189	6473_55_BPIFA1_PLUNC	Acute Lymphoblastic Leukemia
0.449	COPA	Acute Myeloid Leukemia			0.963	6478_2_IGLON5_IGLO5	Acute Lymphoblastic Leukemia
0.552	COPRS	Acute Myeloid Leukemia			0.556	6480_1_CANT1_CANT1	Acute Lymphoblastic Leukemia
0.686	COQ2	Acute Myeloid Leukemia			0.808	6485_59_IGLL1_IGLL1	Acute Lymphoblastic Leukemia
0.89	COQ6	Acute Myeloid Leukemia			0.573	6496_60_DLK1_DLK1	Acute Lymphoblastic Leukemia
0.986	CPA3	Acute Myeloid Leukemia			0.335	6506_54_TMED10_TMEDA	Acute Lymphoblastic Leukemia
0.97	CPEB4	Acute Myeloid Leukemia			0.627	6507_16_NCAM2_NCAM2	Acute Lymphoblastic Leukemia
0.409	CPT1B	Acute Myeloid Leukemia			0.673	6510_56_RNF128_RN128	Acute Lymphoblastic Leukemia
0.983	CPT2	Acute Myeloid Leukemia			0.566	6520_87_MGP_MGP	Acute Lymphoblastic Leukemia
0.513	CRAMP1L	Acute Myeloid Leukemia			0.435	6521_35_NPTX2_NPTX2	Acute Lymphoblastic Leukemia
0.58	CRIPAK	Acute Myeloid Leukemia			0.376	6525_17_DUSP13_DUSP13	Acute Lymphoblastic Leukemia
0.877	CRISPLD2	Acute Myeloid Leukemia			0.208	6527_1_TRIL_TRIL	Acute Lymphoblastic Leukemia
0.823	CRTAP	Acute Myeloid Leukemia			0.114	6528_95_EXTL2_EXTL2	Acute Lymphoblastic Leukemia
0.942	CRYGN	Acute Myeloid Leukemia			0.787	6538_90_KIAA2013_K2013	Acute Lymphoblastic Leukemia
0.799	CRYZ	Acute Myeloid Leukemia			0.554	6543_182_PRLH_PRRP	Acute Lymphoblastic Leukemia
0.665	CSNK2B	Acute Myeloid Leukemia			0.373	6544_33_NELL1_NELL1	Acute Lymphoblastic Leukemia
0.911	CSTF1	Acute Myeloid Leukemia			0.381	6545_58_PRNP_PRIO	Acute Lymphoblastic Leukemia
0.674	CTA-126B4.7	Acute Myeloid Leukemia			0.39	6547_83_TMPRSS11D_TM11D	Acute Lymphoblastic Leukemia
0.239	CTA-445C9.15	Acute Myeloid Leukemia			0.81	6550_4_ICAM4_ICAM4	Acute Lymphoblastic Leukemia
0.803	CTB-118N6.3	Acute Myeloid Leukemia			0.206	6551_94_SERPINA12_Vaspin	Acute Lymphoblastic Leukemia
0.943	CTB-129O4.1	Acute Myeloid Leukemia			0.637	6555_58_STOML2_Stomatin_like_protein_2	Acute Lymphoblastic Leukemia
0.994	CTB-50L17.9	Acute Myeloid Leukemia			0.249	6556_5_ENPP5_ENPP5	Acute Lymphoblastic Leukemia
0.573	CTBP1	Acute Myeloid Leukemia			0.867	6557_50_LRRC15_LRC15	Acute Lymphoblastic Leukemia
0.403	CTC-444N24.11	Acute Myeloid Leukemia			0.02	6558_5_COLEC10_COL10	Acute Lymphoblastic Leukemia
0.134	CTC-523E23.1	Acute Myeloid Leukemia			0.742	6570_1_COL13A1_CODA1	Acute Lymphoblastic Leukemia
0.158	CTC1	Acute Myeloid Leukemia			0.469	6572_10_LRRTM4_LRRT4	Acute Lymphoblastic Leukemia
0.706	CTD-2017D11.1	Acute Myeloid Leukemia			0.633	6576_1_ART4_ART4	Acute Lymphoblastic Leukemia
0.995	CTD-2085J24.4	Acute Myeloid Leukemia			0.795	6577_64_LAMA4_LAMA4	Acute Lymphoblastic Leukemia
0.359	CTD-2382E5.3	Acute Myeloid Leukemia			0.531	6580_29_PZP_Pregnancy_zone_protein	Acute Lymphoblastic Leukemia
0.583	CTD-2561J22.2	Acute Myeloid Leukemia			0.764	6586_19_ADAM11_ADA11	Acute Lymphoblastic Leukemia
0.245	CTD-3099C6.11	Acute Myeloid Leukemia			0.513	6587_6_LRFN5_LRFN5	Acute Lymphoblastic Leukemia
0.551	CTD-3099C6.9	Acute Myeloid Leukemia			0.603	6597_24_FAM174A_TM157	Acute Lymphoblastic Leukemia
0.633	CTGLF12P	Acute Myeloid Leukemia			0.519	6600_70_RELL2_RELL2	Acute Lymphoblastic Leukemia
0.884	CTNNBL1	Acute Myeloid Leukemia			0.267	6605_17_IGFALS_IGFALS	Acute Lymphoblastic Leukemia
0.039	CTSB	Acute Myeloid Leukemia			0.282	6606_61_KISS1_KISS1	Acute Lymphoblastic Leukemia
0.813	CTSG	Acute Myeloid Leukemia			0.545	6617_12_FCRL6_FCRL6	Acute Lymphoblastic Leukemia
0.891	CTU2	Acute Myeloid Leukemia			0.887	6620_82_LINGO1_LIGO1	Acute Lymphoblastic Leukemia
0.529	CUBN	Acute Myeloid Leukemia			0.15	6621_10_RLN2_REL2	Acute Lymphoblastic Leukemia
0.13	CUX1	Acute Myeloid Leukemia			0.089	6626_81_CHST12_CHSTC	Acute Lymphoblastic Leukemia
0.86	CWC22	Acute Myeloid Leukemia			0.914	6627_25_PNLIPRP1_LIPR1	Acute Lymphoblastic Leukemia
0.887	CWF19L1	Acute Myeloid Leukemia			0.901	6629_3_DEFB1_HBD_1	Acute Lymphoblastic Leukemia
0.601	CWF19L2	Acute Myeloid Leukemia			0.473	6649_51_NTN1_NET1	Acute Lymphoblastic Leukemia
0.983	CXCL1	Acute Myeloid Leukemia			0.425	6653_58_CD47_CD47	Acute Lymphoblastic Leukemia
0.967	CXCL5	Acute Myeloid Leukemia			0.532	6713_4_LRP11_LRP11	Acute Lymphoblastic Leukemia
0.323	CXCR2P1	Acute Myeloid Leukemia			0.591	6895_1_TFRC_TR	Acute Lymphoblastic Leukemia
0.383	CXCR6	Acute Myeloid Leukemia			0.301	6896_3_C1orf162_CA162	Acute Lymphoblastic Leukemia
0.148	CYB5R1	Acute Myeloid Leukemia			0.609	6897_38_B3GAT3_B3GA3	Acute Lymphoblastic Leukemia
0.94	CYBRD1	Acute Myeloid Leukemia			0.219	6904_14_LRRTM2_LRRT2	Acute Lymphoblastic Leukemia
0.956	CYP21A1P	Acute Myeloid Leukemia			0.739	6909_40_MGAT2_MGAT2	Acute Lymphoblastic Leukemia
0.418	CYP21A2	Acute Myeloid Leukemia			0.502	6915_2_CD164L2_C16L2	Acute Lymphoblastic Leukemia
[truncated: 8,250 more rows]
