# Supplementary material for: Study on the Gene Regulatory Effects in Leukemia Based on Multi-omics Mendelian Randomization, Network Pharmacology, and Functional Validation
Source: Research Square preprint supplement (doi:10.21203/rs.3.rs-7510513/v1), 2025-09-25
Supplement: Supplementary file 3 [file 5aa4150b01939c3a2686305a.xlsx]

## Sheet: Supplementary Table 2
Supplementary Table 2. MR results
Exposure-eQTL	Outcome	Method	OR	Upper	Lower	Pval			Exposure-pQTL	Outcome	Method	OR	Upper	Lower	Pval
A2MP1	Acute Lymphoblastic Leukemia	MR Egger	0.898908702438285	0.658174831643613	1.22769333689261	0.508922562446756			CRYBB2	Acute lymphocytic leukaemia	MR Egger	0.357762951041017	9.14545567317888e-05	1399.54020566684	0.823278639041841
A2MP1	Acute Lymphoblastic Leukemia	Weighted median	0.83865275158962	0.669882687207569	1.04994	0.124813077457601			CRYBB2	Acute lymphocytic leukaemia	Weighted median	0.712993524158362	0.10421992295831	4.87775994322233	0.730246748990012
A2MP1	Acute Lymphoblastic Leukemia	Inverse variance weighted	0.804459428088489	0.681549097190749	0.949535365988955	0.0101072855910251			CRYBB2	Acute lymphocytic leukaemia	Inverse variance weighted	0.551108009412257	0.0759920610198922	3.9967337898473	0.555580591846137
A2MP1	Acute Lymphoblastic Leukemia	Simple mode	0.762575509900581	0.469344996148696	1.23900630255339	0.283740974496476			CRYBB2	Acute lymphocytic leukaemia	Simple mode	1.12255062489558	0.0519351523664192	24.2633331767837	0.944769000948145
A2MP1	Acute Lymphoblastic Leukemia	Weighted mode	0.827609929272583	0.656098323406061	1.04395663057755	0.122364567105736			CRYBB2	Acute lymphocytic leukaemia	Weighted mode	0.721582036000371	0.0878978829515522	5.92369937926072	0.776432598550979
AARS	Acute Lymphoblastic Leukemia	MR Egger	0.460817386689806	0.0819868491523693	2.59008202011732	0.419354038451652			RAF1	Acute lymphocytic leukaemia	MR Egger	3.28641297599922	7.84054495274633e-05	137752.035271897	0.846897506252387
AARS	Acute Lymphoblastic Leukemia	Weighted median	0.396490961394975	0.134341384525804	1.17019102507251	0.0938618569206651			RAF1	Acute lymphocytic leukaemia	Weighted median	0.197493190534452	0.0190598072603006	2.04637747773647	0.173914671697641
AARS	Acute Lymphoblastic Leukemia	Inverse variance weighted	0.398357110133751	0.159766493666641	0.993251986397239	0.0483220307244259			RAF1	Acute lymphocytic leukaemia	Inverse variance weighted	0.244371383003641	0.0322337520844139	1.85263	0.172762028689466
AARS	Acute Lymphoblastic Leukemia	Simple mode	0.2715643770195	0.0592481030420091	1.24471851552276	0.144320387465421			RAF1	Acute lymphocytic leukaemia	Simple mode	0.863059981291194	0.0325290711765135	22.8986719990998	0.935386889752741
AARS	Acute Lymphoblastic Leukemia	Weighted mode	0.53256884429695	0.130996183149234	2.16517433635963	0.412483908740077			RAF1	Acute lymphocytic leukaemia	Weighted mode	0.108094398858838	0.00557577156693848	2.09556631299892	0.237693018888148
ABCA2	Acute Lymphoblastic Leukemia	MR Egger	0.385653753188079	0.179586911305942	0.828171809774486	0.0244797336874487			ZNF41	Acute lymphocytic leukaemia	MR Egger	0.494682638737451	0.0152657867298617	16.0300230442473	0.729973186070585
ABCA2	Acute Lymphoblastic Leukemia	Weighted median	0.588805541904537	0.358274246408077	0.967672026815488	0.036649272411914			ZNF41	Acute lymphocytic leukaemia	Weighted median	1.32360342103433	0.341470074776342	5.13054040627503	0.68505116033526
ABCA2	Acute Lymphoblastic Leukemia	Inverse variance weighted	0.636685486223564	0.447311602043227	0.906232716781986	0.0121880010993061			ZNF41	Acute lymphocytic leukaemia	Inverse variance weighted	1.8001795222933	0.580118082472359	5.58618393461049	0.308902969755956
ABCA2	Acute Lymphoblastic Leukemia	Simple mode	0.595219438466407	0.274341686434064	1.29140483363404	0.204089842914582			ZNF41	Acute lymphocytic leukaemia	Simple mode	1.45837007982032	0.237630169003851	8.95022420188016	0.71090468055851
ABCA2	Acute Lymphoblastic Leukemia	Weighted mode	0.595219438466407	0.36276527503593	0.976626497376782	0.0533216842141782			ZNF41	Acute lymphocytic leukaemia	Weighted mode	1.23562454711765	0.254687054751936	5.9946824660043	0.809874397484895
ABCB9	Acute Lymphoblastic Leukemia	MR Egger	1.34184820037632	0.564408547542591	3.19016535219516	0.51297872607745			GUCA1A	Acute lymphocytic leukaemia	MR Egger	2.64772351130155	0.610218741668039	11.4884045893705	0.241190751230639
ABCB9	Acute Lymphoblastic Leukemia	Weighted median	1.77130378500496	0.964384818707011	3.2533870690535	0.0653159009977857			GUCA1A	Acute lymphocytic leukaemia	Weighted median	2.15316598666367	0.877419170022118	5.2838186405347	0.0940354218738632
ABCB9	Acute Lymphoblastic Leukemia	Inverse variance weighted	1.79635672405556	1.16330758913441	2.77389876091213	0.0082328745542684			GUCA1A	Acute lymphocytic leukaemia	Inverse variance weighted	1.46108876941477	0.525969101419674	4.05875627740843	0.466971496118907
ABCB9	Acute Lymphoblastic Leukemia	Simple mode	2.50329083225515	0.880684165557757	7.11545095952075	0.0991723900132868			GUCA1A	Acute lymphocytic leukaemia	Simple mode	2.45935437692193	0.412016428318085	14.6800552977358	0.35641068413251
ABCB9	Acute Lymphoblastic Leukemia	Weighted mode	1.82269611137594	0.966767133460578	3.43642331171619	0.0769679727943995			GUCA1A	Acute lymphocytic leukaemia	Weighted mode	2.1918043841879	0.82485698291341	5.82404775380265	0.159525450526667
ABT1	Acute Lymphoblastic Leukemia	MR Egger	2.90966	1.11782799680907	7.57372535178129	0.0491651079828179			OCRL	Acute lymphocytic leukaemia	MR Egger	0.134653443168775	0.0128261876638286	1.41363515273832	0.169954980322782
ABT1	Acute Lymphoblastic Leukemia	Weighted median	2.56462505720208	1.13877045222327	5.7757923655181	0.0229826354704874			OCRL	Acute lymphocytic leukaemia	Weighted median	0.620918320924942	0.282622641776563	1.36414959125975	0.235339385166341
ABT1	Acute Lymphoblastic Leukemia	Inverse variance weighted	2.22514603948829	1.23436397113949	4.01119524938797	0.00780608684355825			OCRL	Acute lymphocytic leukaemia	Inverse variance weighted	0.700124738195387	0.311474113823482	1.57372515813931	0.388304845382942
ABT1	Acute Lymphoblastic Leukemia	Simple mode	3.45941207614907	1.00629046320992	11.8927211875101	0.0705268631193475			OCRL	Acute lymphocytic leukaemia	Simple mode	0.743376034100245	0.24676472836698	2.23941213856459	0.620678807250144
ABT1	Acute Lymphoblastic Leukemia	Weighted mode	2.94945801816498	1.2516022511388	6.95053288135462	0.0279683106177861			OCRL	Acute lymphocytic leukaemia	Weighted mode	0.609395002290514	0.292997232641054	1.26745998748598	0.242296753663625
AC002511.1	Acute Lymphoblastic Leukemia	MR Egger	3.13533012101513	0.115653522385141	84.9978000238386	0.620375471352052			SPDEF	Acute lymphocytic leukaemia	MR Egger	0.712090088286494	0.118099802976289	4.29359136134775	0.729852330301237
AC002511.1	Acute Lymphoblastic Leukemia	Weighted median	4.2691781043937	1.22148143968017	14.921128635247	0.023004443745985			SPDEF	Acute lymphocytic leukaemia	Weighted median	1.02432791878602	0.437422390168191	2.39870593912915	0.955845549102903
AC002511.1	Acute Lymphoblastic Leukemia	Inverse variance weighted	4.07496381641853	1.27616062041233	13.0119436687798	0.0177076258383996			SPDEF	Acute lymphocytic leukaemia	Inverse variance weighted	1.09336392605854	0.542813640709401	2.20231141067829	0.8027134922736
AC002511.1	Acute Lymphoblastic Leukemia	Simple mode	6.9472040005769	1.24496113409343	38.767188873552	0.157719803370248			SPDEF	Acute lymphocytic leukaemia	Simple mode	1.02844063278979	0.238499571958785	4.43476743579165	0.97145342326682
AC002511.1	Acute Lymphoblastic Leukemia	Weighted mode	2.69734406400063	0.612716527325742	11.8744389536132	0.319825695248719			SPDEF	Acute lymphocytic leukaemia	Weighted mode	1.03878682880643	0.392967852419303	2.74597036133716	0.94181629063265
AC004696.2	Acute Lymphoblastic Leukemia	MR Egger	2.17452064537156	0.548785249688378	8.61637596825386	0.311164550113853			SNAI2	Acute lymphocytic leukaemia	MR Egger	0.402827506190544	0.00310252274556333	52.3025979344525	0.749313667708691
AC004696.2	Acute Lymphoblastic Leukemia	Weighted median	2.13077644215735	1.26150505545118	3.59904086538038	0.00467478554047806			SNAI2	Acute lymphocytic leukaemia	Weighted median	1.20223788842705	0.23222701120694	6.22397856673759	0.826215690135637
AC004696.2	Acute Lymphoblastic Leukemia	Inverse variance weighted	2.59112227264372	1.69548104921763	3.95988774683648	1.08309279146213e-05			SNAI2	Acute lymphocytic leukaemia	Inverse variance weighted	1.58770005376268	0.3633608497396	6.9374327545869	0.538924434350722
AC004696.2	Acute Lymphoblastic Leukemia	Simple mode	2.09629625590334	0.983341163073444	4.46890474795077	0.0968268052035508			SNAI2	Acute lymphocytic leukaemia	Simple mode	1.05277075222573	0.0746789734765751	14.8412090464738	0.972006502531902
AC004696.2	Acute Lymphoblastic Leukemia	Weighted mode	2.10945633118329	1.20366132518143	3.69689207427059	0.0350375255775625			SNAI2	Acute lymphocytic leukaemia	Weighted mode	1.01816237102681	0.165543579462612	6.26212515846357	0.985724639298647
AC005154.6	Acute Lymphoblastic Leukemia	MR Egger	0.948932375393642	0.771069692368009	1.16782265206768	0.624932183459854			KCNAB2	Acute lymphocytic leukaemia	MR Egger	0.498995830187404	0.000185285154163661	1343.85747022387	0.891251340207488
AC005154.6	Acute Lymphoblastic Leukemia	Weighted median	0.877275775699808	0.721645387641172	1.0664694873826	0.188807272745159			KCNAB2	Acute lymphocytic leukaemia	Weighted median	1.07398595455724	0.0977173078059652	11.8039051267827	0.953459643614734
AC005154.6	Acute Lymphoblastic Leukemia	Inverse variance weighted	0.849625013967437	0.746989176031319	0.966362950791809	0.0131051156483166			KCNAB2	Acute lymphocytic leukaemia	Inverse variance weighted	1.34603264062353	0.164006148390068	11.0471704104337	0.782017968890981
AC005154.6	Acute Lymphoblastic Leukemia	Simple mode	0.710001459615806	0.494115566482852	1.02021087140567	0.0754416918543589			KCNAB2	Acute lymphocytic leukaemia	Simple mode	1.06173630202361	0.0552144748555875	20.416457423224	0.971928295121894
AC005154.6	Acute Lymphoblastic Leukemia	Weighted mode	0.870640693261303	0.72236029242873	1.04935892062106	0.157851451647871			KCNAB2	Acute lymphocytic leukaemia	Weighted mode	1.04131873906299	0.0534773659012111	20.2767039484865	0.981103511186868
AC005488.1	Acute Lymphoblastic Leukemia	MR Egger	0.799311482828158	0.62061904997619	1.02945413390946	0.0917730057288518			VDR	Acute lymphocytic leukaemia	MR Egger	0.501394108586227	0.0217820053522335	11.5414558053627	0.695277048019676
AC005488.1	Acute Lymphoblastic Leukemia	Weighted median	0.833595473375706	0.677101632933245	1.02625865813113	0.0862225248191813			VDR	Acute lymphocytic leukaemia	Weighted median	1.45227058926523	0.467940279624209	4.50717742473151	0.518445945073637
AC005488.1	Acute Lymphoblastic Leukemia	Inverse variance weighted	0.829605225666789	0.72253899634853	0.952536588242022	0.00805517221120164			VDR	Acute lymphocytic leukaemia	Inverse variance weighted	1.43785749664347	0.412754163657794	5.0088754098381	0.5684660429333
AC005488.1	Acute Lymphoblastic Leukemia	Simple mode	0.927639720899211	0.664182671750386	1.29560057554974	0.662167280369101			VDR	Acute lymphocytic leukaemia	Simple mode	0.556716943192581	0.0662828195787411	4.67592894821717	0.618217394324963
AC005488.1	Acute Lymphoblastic Leukemia	Weighted mode	0.846480666344811	0.695017401280681	1.0309519116719	0.106467816021391			VDR	Acute lymphocytic leukaemia	Weighted mode	1.1925625115808	0.380253749622486	3.74014811277963	0.777720318635968
AC005682.6	Acute Lymphoblastic Leukemia	MR Egger	1.05553869836088	0.567341708530055	1.96382872435748	0.867134644577143			HOGA1	Acute lymphocytic leukaemia	MR Egger	0.348626422425185	0.00678547300647049	17.9118511409721	0.636337900076599
AC005682.6	Acute Lymphoblastic Leukemia	Weighted median	1.26318208427077	0.931747613312411	1.71251200993164	0.132400082987172			HOGA1	Acute lymphocytic leukaemia	Weighted median	1.12416741956327	0.274682473403817	4.60077547557855	0.870682158617979
AC005682.6	Acute Lymphoblastic Leukemia	Inverse variance weighted	1.27162494607765	1.0146604268157	1.59366617712854	0.0369455687623154			HOGA1	Acute lymphocytic leukaemia	Inverse variance weighted	1.20593288093282	0.304647435210368	4.77362992506634	0.789657283438065
AC005682.6	Acute Lymphoblastic Leukemia	Simple mode	1.15154148299878	0.741862042130472	1.7874587345902	0.539489419628532			HOGA1	Acute lymphocytic leukaemia	Simple mode	0.793086774274209	0.0547224368275937	11.4941268699406	0.873303102755938
AC005682.6	Acute Lymphoblastic Leukemia	Weighted mode	1.23577195277543	0.876516386677605	1.74227469386503	0.24707861038186			HOGA1	Acute lymphocytic leukaemia	Weighted mode	1.07453352942194	0.226503600382846	5.09758919461049	0.932240528841366
AC006129.4	Acute Lymphoblastic Leukemia	MR Egger	1.20830312147647	0.684069982549181	2.13427934365591	0.530768485613918			DUSP4	Acute lymphocytic leukaemia	MR Egger	7.53707146988101e-05	1.59024840083111e-08	0.357223728773474	0.158989788289895
AC006129.4	Acute Lymphoblastic Leukemia	Weighted median	1.21378131850761	0.839806694391468	1.75429071832492	0.302554397566396			DUSP4	Acute lymphocytic leukaemia	Weighted median	2.10824048670667	0.289356590117507	15.3605554585234	0.461664917937378
AC006129.4	Acute Lymphoblastic Leukemia	Inverse variance weighted	1.32504205025623	1.00109868507921	1.75380955056225	0.0491052041677505			DUSP4	Acute lymphocytic leukaemia	Inverse variance weighted	1.88663925928846	0.217233355176306	16.3851803135835	0.56488661288645
AC006129.4	Acute Lymphoblastic Leukemia	Simple mode	1.26652388600388	0.686623691280667	2.33618905695852	0.466856098178223			DUSP4	Acute lymphocytic leukaemia	Simple mode	6.18817024495524	0.186397095470114	205.440169998192	0.382836968010946
AC006129.4	Acute Lymphoblastic Leukemia	Weighted mode	1.2120409646021	0.793813984362066	1.8506140340349	0.394058031874031			DUSP4	Acute lymphocytic leukaemia	Weighted mode	5.5513730995501	0.134066415328157	229.869227240657	0.433422708684998
AC009299.3	Acute Lymphoblastic Leukemia	MR Egger	1.19209814070032	0.875794088778469	1.62263937981502	0.271844526864247			ZHX3	Acute lymphocytic leukaemia	MR Egger	1.27330972057118	0.0942750879202185	17.1977314502545	0.872412313971433
AC009299.3	Acute Lymphoblastic Leukemia	Weighted median	1.34714399840975	1.08610056644657	1.67092901754846	0.00669644728388733			ZHX3	Acute lymphocytic leukaemia	Weighted median	0.401806184225524	0.0950914357851262	1.69782071696439	0.214950474784187
AC009299.3	Acute Lymphoblastic Leukemia	Inverse variance weighted	1.31881161340871	1.14853879127861	1.51432766996529	8.725563188463e-05			ZHX3	Acute lymphocytic leukaemia	Inverse variance weighted	0.581754372237869	0.188459019778778	1.79581826338242	0.346213699467862
AC009299.3	Acute Lymphoblastic Leukemia	Simple mode	1.41013363966467	0.967975319496349	2.05426403097607	0.0820374334853774			ZHX3	Acute lymphocytic leukaemia	Simple mode	0.313134418072648	0.0363153302628026	2.7000487968061	0.368350317871427
AC009299.3	Acute Lymphoblastic Leukemia	Weighted mode	1.35309944832714	1.08396103985014	1.68906265977635	0.011354774576775			ZHX3	Acute lymphocytic leukaemia	Weighted mode	0.328724458413058	0.0603914923616068	1.78932106714515	0.288421571485525
AC009404.2	Acute Lymphoblastic Leukemia	MR Egger	2.51035426020395	0.363436243460195	17.3397084774082	0.393419722217894			SIGLEC12	Acute lymphocytic leukaemia	MR Egger	0.760415345270888	0.403947221582732	1.43145308700933	0.415940279411173
AC009404.2	Acute Lymphoblastic Leukemia	Weighted median	2.84153928236137	1.15886216709331	6.9674769981102	0.0224777852657622			SIGLEC12	Acute lymphocytic leukaemia	Weighted median	0.815774138441084	0.453285326319301	1.46814248401351	0.497030352446598
AC009404.2	Acute Lymphoblastic Leukemia	Inverse variance weighted	2.21243582920302	1.03888263706517	4.7116701383798	0.0395035180697649			SIGLEC12	Acute lymphocytic leukaemia	Inverse variance weighted	0.631162827436404	0.401749888735547	0.991578407131164	0.0458583653455738
AC009404.2	Acute Lymphoblastic Leukemia	Simple mode	2.89037994063912	0.751166389175534	11.1217651929535	0.173579861690564			SIGLEC12	Acute lymphocytic leukaemia	Simple mode	0.89309865152276	0.350996291059682	2.27246048368114	0.816806287752144
AC009404.2	Acute Lymphoblastic Leukemia	Weighted mode	3.09249383774746	1.12506174726255	8.50043845128993	0.0712299600313814			SIGLEC12	Acute lymphocytic leukaemia	Weighted mode	0.786332862157801	0.453438438280226	1.36362363202909	0.410363191652075
AC009506.1	Acute Lymphoblastic Leukemia	MR Egger	1.01519221323882	0.824025133087658	1.25070848987211	0.888049979941212			HNF4A	Acute lymphocytic leukaemia	MR Egger	1.99362415046253	0.178252532549621	22.2972274023709	0.605308467639748
AC009506.1	Acute Lymphoblastic Leukemia	Weighted median	0.939631512982838	0.784404913560694	1.12557604488042	0.499096653241034			HNF4A	Acute lymphocytic leukaemia	Weighted median	0.971985894912796	0.332361501464451	2.84255720276459	0.958610909617076
AC009506.1	Acute Lymphoblastic Leukemia	Inverse variance weighted	0.854245523387071	0.753587272171492	0.96834891083562	0.013785324664042			HNF4A	Acute lymphocytic leukaemia	Inverse variance weighted	1.0524739861832	0.421998515796032	2.62489428310634	0.912658676944794
AC009506.1	Acute Lymphoblastic Leukemia	Simple mode	0.69498006381734	0.47034274408762	1.02690494362889	0.0748551561482454			HNF4A	Acute lymphocytic leukaemia	Simple mode	0.494332384635319	0.0907210567539495	2.69358090880707	0.452393129917164
AC009506.1	Acute Lymphoblastic Leukemia	Weighted mode	0.950948193661505	0.791237246739958	1.14289673641372	0.594675494126906			HNF4A	Acute lymphocytic leukaemia	Weighted mode	0.539595955833508	0.129242886868228	2.25284	0.436104601899713
AC011816.1	Acute Lymphoblastic Leukemia	MR Egger	0.617351525289953	0.417755195367554	0.912311588231732	0.0256802907768682			WNT10A	Acute lymphocytic leukaemia	MR Egger	1.03322195306609	0.130348150567559	8.18997123970999	0.976798210036354
AC011816.1	Acute Lymphoblastic Leukemia	Weighted median	0.714927118795877	0.54770870404264	0.933198215433113	0.0135642850756941			WNT10A	Acute lymphocytic leukaemia	Weighted median	1.01625410273881	0.391395206011461	2.63869456107548	0.973578816471632
AC011816.1	Acute Lymphoblastic Leukemia	Inverse variance weighted	0.672604789586271	0.552088641947411	0.819428563823788	8.25537657529755e-05			WNT10A	Acute lymphocytic leukaemia	Inverse variance weighted	1.03290322878978	0.444660165093466	2.39933586094922	0.939987499633504
AC011816.1	Acute Lymphoblastic Leukemia	Simple mode	0.610823408496721	0.389777079610159	0.957227235477055	0.043905107311762			WNT10A	Acute lymphocytic leukaemia	Simple mode	0.715251705947671	0.122166172450235	4.18761587271183	0.725368041137325
AC011816.1	Acute Lymphoblastic Leukemia	Weighted mode	0.717333669526554	0.542980775496445	0.947671845225024	0.0298715617960765			WNT10A	Acute lymphocytic leukaemia	Weighted mode	0.977373205640651	0.323166876570854	2.95592912627864	0.969236851272682
AC012309.5	Acute Lymphoblastic Leukemia	MR Egger	1.08924751155084	0.56731581809542	2.09135741253057	0.800371854276568			BIRC2	Acute lymphocytic leukaemia	MR Egger	0.874544820789731	0.521249479228814	1.46729862387911	0.629756863499919
AC012309.5	Acute Lymphoblastic Leukemia	Weighted median	0.854103628700095	0.639591994338316	1.14055994292636	0.285195892117138			BIRC2	Acute lymphocytic leukaemia	Weighted median	1.04628749464069	0.656471307972849	1.66757862551818	0.849102723861103
AC012309.5	Acute Lymphoblastic Leukemia	Inverse variance weighted	0.763884949881513	0.601326909538097	0.970387666674865	0.0273680923098024			BIRC2	Acute lymphocytic leukaemia	Inverse variance weighted	1.06183642359386	0.698866899454449	1.61332092183899	0.778602366653814
AC012309.5	Acute Lymphoblastic Leukemia	Simple mode	0.840825540709842	0.530246361798102	1.33331907740499	0.470595994500568			BIRC2	Acute lymphocytic leukaemia	Simple mode	0.701083613876956	0.228325381865757	2.15270956575366	0.554618031247839
AC012309.5	Acute Lymphoblastic Leukemia	Weighted mode	0.867409943281718	0.656044583618787	1.14687328954643	0.331384114130766			BIRC2	Acute lymphocytic leukaemia	Weighted mode	1.04344210817795	0.673278345678396	1.61711933869164	0.854519223040399
AC012314.20	Acute Lymphoblastic Leukemia	MR Egger	0.28169304283883	0.0213429502445736	3.71790073417679	0.512181899215509			NCF2	Acute lymphocytic leukaemia	MR Egger	3.32771627161221	1.01930932162275	10.8639206465053	0.0815602253614758
AC012314.20	Acute Lymphoblastic Leukemia	Weighted median	2.0746	1.09033117161612	3.94740871353473	0.0261824110345245			NCF2	Acute lymphocytic leukaemia	Weighted median	0.679113248295826	0.276815841664235	1.66607084781772	0.398034252391245
AC012314.20	Acute Lymphoblastic Leukemia	Inverse variance weighted	2.14185654962157	1.0101116166757	4.54162629497773	0.0470071337543734			NCF2	Acute lymphocytic leukaemia	Inverse variance weighted	1.30943435225618	0.619237665825203	2.76891800595437	0.480428531730517
AC012314.20	Acute Lymphoblastic Leukemia	Simple mode	3.85038587797353	1.14280090482965	12.9729258584266	0.161594063200917			NCF2	Acute lymphocytic leukaemia	Simple mode	0.723401848821994	0.143705921012878	3.64153565274589	0.703702293081347
AC012314.20	Acute Lymphoblastic Leukemia	Weighted mode	1.51589315265461	0.765953189856384	3.00009462810122	0.354752214669761			NCF2	Acute lymphocytic leukaemia	Weighted mode	0.635492225357585	0.194110709598758	2.08051564658502	0.47284036117291
AC016773.1	Acute Lymphoblastic Leukemia	MR Egger	1.37439698767198	0.992611824522493	1.90302697696607	0.0650253520213686			CBFB	Acute lymphocytic leukaemia	MR Egger	5169.48043324333	5.22672393908268e-06	5112863862937.42	0.503391909692986
AC016773.1	Acute Lymphoblastic Leukemia	Weighted median	1.40110512226281	1.13174178318238	1.73457902924728	0.00196071493095916			CBFB	Acute lymphocytic leukaemia	Weighted median	0.940558235475108	0.116479753920641	7.59488035081847	0.95414359553867
AC016773.1	Acute Lymphoblastic Leukemia	Inverse variance weighted	1.35494217380245	1.1747890962326	1.56272159848598	3.0057131267984e-05			CBFB	Acute lymphocytic leukaemia	Inverse variance weighted	1.66205799161048	0.290841555761106	9.49808138746616	0.567797845831035
AC016773.1	Acute Lymphoblastic Leukemia	Simple mode	1.49645319511247	1.09113646729586	2.05233005428929	0.0178703289625585			CBFB	Acute lymphocytic leukaemia	Simple mode	0.682791253466684	0.0343690699222544	13.5646352044206	0.818584910834886
AC016773.1	Acute Lymphoblastic Leukemia	Weighted mode	1.41586659661104	1.16322305769865	1.72338246403492	0.00156227965148258			CBFB	Acute lymphocytic leukaemia	Weighted mode	0.6684145532261	0.0393517799177741	11.3534385458039	0.798533035999195
AC018638.1	Acute Lymphoblastic Leukemia	MR Egger	0.607315669390063	0.190336920391042	1.93778653941098	0.437960826269073			ILK	Acute lymphocytic leukaemia	MR Egger	0.731744212580689	0.117579237107587	4.55394681762893	0.794316464249554
AC018638.1	Acute Lymphoblastic Leukemia	Weighted median	0.666148520874976	0.419612203315679	1.0575332374928	0.0849290293372885			ILK	Acute lymphocytic leukaemia	Weighted median	1.01510840316034	0.379482050752679	2.71539870758819	0.976170236829676
AC018638.1	Acute Lymphoblastic Leukemia	Inverse variance weighted	0.59280860101439	0.373027032397821	0.942081958987517	0.0269356735321245			ILK	Acute lymphocytic leukaemia	Inverse variance weighted	1.01443999393648	0.37857518933781	2.71831998049816	0.977256742838381
AC018638.1	Acute Lymphoblastic Leukemia	Simple mode	0.810970734985019	0.324266757390491	2.02818672593735	0.669875858545036			ILK	Acute lymphocytic leukaemia	Simple mode	2.13105179803559	0.312645889944059	14.525640387351	0.520540099044072
AC018638.1	Acute Lymphoblastic Leukemia	Weighted mode	0.706378955323107	0.446678329201641	1.11707059846666	0.187688719358531			ILK	Acute lymphocytic leukaemia	Weighted mode	0.956617153848948	0.354139044471082	2.58405954758481	0.938260389682971
AC018755.15	Acute Lymphoblastic Leukemia	MR Egger	1.23184253576702	0.0938119077394438	16.1753030024662	0.888473175846063			FOXM1	Acute lymphocytic leukaemia	MR Egger	0.0897469343808257	0.000292543960922452	27.5326559651365	0.496027700748929
AC018755.15	Acute Lymphoblastic Leukemia	Weighted median	0.673611964233737	0.343029380598321	1.32278196569456	0.251161983366258			FOXM1	Acute lymphocytic leukaemia	Weighted median	1.38023878469781	0.236621145903598	8.05109406223658	0.720228172264583
AC018755.15	Acute Lymphoblastic Leukemia	Inverse variance weighted	0.556186213694208	0.314645851034725	0.983146935788959	0.0435412824605073			FOXM1	Acute lymphocytic leukaemia	Inverse variance weighted	1.53454956036563	0.32853352710481	7.16773832482277	0.58606288095715
AC018755.15	Acute Lymphoblastic Leukemia	Simple mode	0.639775584537697	0.270053977560206	1.51567031994298	0.384856998579114			FOXM1	Acute lymphocytic leukaemia	Simple mode	1.0937738242572	0.0959767929030878	12.4649005498468	0.946986939929078
AC018755.15	Acute Lymphoblastic Leukemia	Weighted mode	0.664789594942452	0.308640776629784	1.43190802709088	0.373626144334102			FOXM1	Acute lymphocytic leukaemia	Weighted mode	1.26035688815376	0.135034169389891	11.7636853893631	0.852088701862419
AC018755.16	Acute Lymphoblastic Leukemia	MR Egger	1.12847823639721	0.762221633236177	1.67072551406787	0.550702026783471			FANCL	Acute lymphocytic leukaemia	MR Egger	0.0386392569367999	8.81092682443458e-05	16.9447801165213	0.485013049725452
AC018755.16	Acute Lymphoblastic Leukemia	Weighted median	1.41406849195168	1.0630471759502	1.88099808283971	0.0173136035331129			FANCL	Acute lymphocytic leukaemia	Weighted median	1.76881625818826	0.375548873492633	8.33103538864029	0.470714439623436
AC018755.16	Acute Lymphoblastic Leukemia	Inverse variance weighted	1.40227565667199	1.14039985305803	1.72428732959052	0.00134746089733382			FANCL	Acute lymphocytic leukaemia	Inverse variance weighted	1.80346206674113	0.377886298340842	8.60702131952019	0.459570194732664
AC018755.16	Acute Lymphoblastic Leukemia	Simple mode	1.44032579770711	0.923945260468325	2.24530444854393	0.117699349647946			FANCL	Acute lymphocytic leukaemia	Simple mode	0.669377729152596	0.0657610163731803	6.81355868563222	0.766847272777849
AC018755.16	Acute Lymphoblastic Leukemia	Weighted mode	1.38470109659131	1.04105018948645	1.84179124720877	0.0329105695254305			FANCL	Acute lymphocytic leukaemia	Weighted mode	1.17433408009243	0.207021636751745	6.66143188366479	0.87272127846686
AC018804.6	Acute Lymphoblastic Leukemia	MR Egger	1.23598038243101	0.925447245098418	1.65071268388924	0.201247355441187			RBBP9	Acute lymphocytic leukaemia	MR Egger	3.97448225250207	0.000633904067631391	24919.4002406046	0.77731311870984
AC018804.6	Acute Lymphoblastic Leukemia	Weighted median	1.24635627977739	0.978851865301597	1.58696533275944	0.0740032375563081			RBBP9	Acute lymphocytic leukaemia	Weighted median	0.666011957503071	0.0934700740259435	4.74560368288523	0.68497128146721
AC018804.6	Acute Lymphoblastic Leukemia	Inverse variance weighted	1.25876205000127	1.01056765091736	1.56791274397619	0.0399933387744094			RBBP9	Acute lymphocytic leukaemia	Inverse variance weighted	1.12540027723221	0.226397273937252	5.59426251901494	0.885188673704274
AC018804.6	Acute Lymphoblastic Leukemia	Simple mode	1.26087349156046	0.769069891889989	2.06717488031281	0.388661378827317			RBBP9	Acute lymphocytic leukaemia	Simple mode	0.375159072325281	0.0126863722338737	11.0941352621017	0.600787812728246
AC018804.6	Acute Lymphoblastic Leukemia	Weighted mode	1.24384067509218	0.962564390564833	1.6073102643096	0.13919176677601			RBBP9	Acute lymphocytic leukaemia	Weighted mode	0.31140379217035	0.0114479971374599	8.47068012104612	0.526872436150365
AC068831.10	Acute Lymphoblastic Leukemia	MR Egger	0.887744476385365	0.233794891382636	3.37086174420686	0.872284663102134			ACBD6	Acute lymphocytic leukaemia	MR Egger	0.00186636341801457	1.25479667860023e-06	2.77599747234651	0.340803884193156
AC068831.10	Acute Lymphoblastic Leukemia	Weighted median	0.504932125425569	0.294685053911794	0.86518283809228	0.0128799923708176			ACBD6	Acute lymphocytic leukaemia	Weighted median	0.76978368160164	0.0854837331412882	6.93192604820821	0.815499217622251
AC068831.10	Acute Lymphoblastic Leukemia	Inverse variance weighted	0.47996917039628	0.304866125518583	0.755644478831584	0.00152434608182845			ACBD6	Acute lymphocytic leukaemia	Inverse variance weighted	1.00058538969715	0.069404725696456	14.4251146017644	0.99965702257852
AC068831.10	Acute Lymphoblastic Leukemia	Simple mode	0.522065077634791	0.261209272361025	1.04342369940497	0.139649396606119			ACBD6	Acute lymphocytic leukaemia	Simple mode	2.10835133290242	0.0353554907444765	125.727157206717	0.754849130378315
AC068831.10	Acute Lymphoblastic Leukemia	Weighted mode	0.511287317249957	0.274522444139513	0.95225263493504	0.102007122991421			ACBD6	Acute lymphocytic leukaemia	Weighted mode	0.345731332939551	0.027284303058776	4.38091287575374	0.498495316428628
AC079325.6	Acute Lymphoblastic Leukemia	MR Egger	1.11700472580251	0.91884191700771	1.35790448212068	0.276940414622366			BAG3	Acute lymphocytic leukaemia	MR Egger	269721151563.931	0	Inf	0.960961863687675
AC079325.6	Acute Lymphoblastic Leukemia	Weighted median	1.16144959078411	0.999527405951842	1.34960296626181	0.0507214273680407			BAG3	Acute lymphocytic leukaemia	Weighted median	0.79046253246003	0.0809423364985704	7.71945859549235	0.839733351749421
AC079325.6	Acute Lymphoblastic Leukemia	Inverse variance weighted	1.22137670862135	1.09374331901923	1.36390416144475	0.000383440044306945			BAG3	Acute lymphocytic leukaemia	Inverse variance weighted	1.61129120291466	0.0760994476004642	34.1166647387641	0.759392973652142
AC079325.6	Acute Lymphoblastic Leukemia	Simple mode	1.16503082316599	0.907141585812275	1.49623	0.241878635241877			BAG3	Acute lymphocytic leukaemia	Simple mode	0.228049844309888	0.00475280595084613	10.9423216574844	0.532218248736558
AC079325.6	Acute Lymphoblastic Leukemia	Weighted mode	1.14488280909264	0.98315651638507	1.33321259098737	0.0930027155454031			BAG3	Acute lymphocytic leukaemia	Weighted mode	11.6732243972926	0.690304489972382	197.397191831967	0.230656256460851
AC079776.7	Acute Lymphoblastic Leukemia	MR Egger	0.614675932842157	0.082882640979388	4.5585721925697	0.658871754095625			SATB2	Acute lymphocytic leukaemia	MR Egger	0.363870089050714	0.0570177716615237	2.32210831548721	0.345255475199803
AC079776.7	Acute Lymphoblastic Leukemia	Weighted median	0.435224426928831	0.194588032649862	0.973442709790731	0.0428122313138714			SATB2	Acute lymphocytic leukaemia	Weighted median	1.12992821205035	0.502904151166139	2.53872981844909	0.767412027374297
AC079776.7	Acute Lymphoblastic Leukemia	Inverse variance weighted	0.415694846406291	0.203838947094572	0.847738902657192	0.0157646228500782			SATB2	Acute lymphocytic leukaemia	Inverse variance weighted	1.26405500440251	0.552876747828561	2.89003844062999	0.578628220413435
AC079776.7	Acute Lymphoblastic Leukemia	Simple mode	0.407065199155614	0.130289203639592	1.27180205062859	0.182691081793578			SATB2	Acute lymphocytic leukaemia	Simple mode	2.14547679910977	0.335440557966664	13.7224631494197	0.456701633537225
AC079776.7	Acute Lymphoblastic Leukemia	Weighted mode	0.454164946543076	0.198254252363865	1.04041046388204	0.120983023973814			SATB2	Acute lymphocytic leukaemia	Weighted mode	1.06258750400229	0.407650276421926	2.76975699261685	0.905999039587453
AC083949.1	Acute Lymphoblastic Leukemia	MR Egger	0.571302443214709	0.286049956968701	1.14101216823049	0.140993776814507			NEFL	Acute lymphocytic leukaemia	MR Egger	0.3478897407196	0.155579905602486	0.777910689875217	0.0330406936291205
AC083949.1	Acute Lymphoblastic Leukemia	Weighted median	0.609608640521629	0.414702276102966	0.896119254735797	0.0118020488236893			NEFL	Acute lymphocytic leukaemia	Weighted median	0.734960445612354	0.423611815564518	1.2751458688537	0.273345286741331
AC083949.1	Acute Lymphoblastic Leukemia	Inverse variance weighted	0.663942975901833	0.490924818371008	0.897938459726107	0.00783964252630024			NEFL	Acute lymphocytic leukaemia	Inverse variance weighted	0.564407142167413	0.337830072610124	0.942945723180832	0.0289366166588141
AC083949.1	Acute Lymphoblastic Leukemia	Simple mode	0.559767025027186	0.292301474294476	1.07197243210657	0.105558163702313			NEFL	Acute lymphocytic leukaemia	Simple mode	0.714153315637331	0.279280413565037	1.8261751754282	0.499951765811454
AC083949.1	Acute Lymphoblastic Leukemia	Weighted mode	0.584096407821448	0.344330489389766	0.990817322725473	0.0693551394996424			NEFL	Acute lymphocytic leukaemia	Weighted mode	0.548072883977976	0.344599258721352	0.87169045942386	0.0317092331287203
AC087793.1	Acute Lymphoblastic Leukemia	MR Egger	0.87654925125636	0.466344267271053	1.64757807440035	0.690223793992043			STAR	Acute lymphocytic leukaemia	MR Egger	0.488156194021646	3.63951321033227e-05	6547.48192931943	0.895992035698631
AC087793.1	Acute Lymphoblastic Leukemia	Weighted median	1.22485635436199	0.879729740923355	1.70537952626936	0.229696921667057			STAR	Acute lymphocytic leukaemia	Weighted median	5.12765117546259	0.680195916867023	38.6547550863394	0.112721969036394
AC087793.1	Acute Lymphoblastic Leukemia	Inverse variance weighted	1.36767541185573	1.06762419265138	1.7520547446095	0.0132184512510318			STAR	Acute lymphocytic leukaemia	Inverse variance weighted	4.61851527152257	0.488429003131395	43.6720243403501	0.18192199819048
AC087793.1	Acute Lymphoblastic Leukemia	Simple mode	1.39188227872674	0.806597858682664	2.4018614195153	0.257863701299643			STAR	Acute lymphocytic leukaemia	Simple mode	12.6391054363275	0.452675841112509	352.894879121459	0.23217180202922
AC087793.1	Acute Lymphoblastic Leukemia	Weighted mode	1.1730984213221	0.850779060664807	1.6175291209366	0.34926403028235			STAR	Acute lymphocytic leukaemia	Weighted mode	6.28246253096344	0.272903721755838	144.627325706727	0.334049072290136
AC093609.1	Acute Lymphoblastic Leukemia	MR Egger	0.436092487077028	0.0931573695931898	2.04145585170034	0.369349468672183			APRT	Acute lymphocytic leukaemia	MR Egger	0.487818095506694	0.0868872406721259	2.7387967722644	0.460587449012196
AC093609.1	Acute Lymphoblastic Leukemia	Weighted median	0.606024916053476	0.37380169677463	0.982516136354115	0.0421994776334769			APRT	Acute lymphocytic leukaemia	Weighted median	1.05053827592203	0.407535677104175	2.70805902692816	0.918717748170866
AC093609.1	Acute Lymphoblastic Leukemia	Inverse variance weighted	0.563356995764097	0.367242914661394	0.864199395021607	0.00857499955535275			APRT	Acute lymphocytic leukaemia	Inverse variance weighted	1.07192242481148	0.4570754819319	2.51384668448462	0.873110670690976
AC093609.1	Acute Lymphoblastic Leukemia	Simple mode	0.622047165265821	0.339753905225765	1.13889103219615	0.19874892604554			APRT	Acute lymphocytic leukaemia	Simple mode	1.11342700233049	0.28496978722236	4.35035482744461	0.883240367452886
AC093609.1	Acute Lymphoblastic Leukemia	Weighted mode	0.6150444875756	0.36050373007634	1.04930875921042	0.14909229776507			APRT	Acute lymphocytic leukaemia	Weighted mode	0.99737357315427	0.382691605359482	2.59936207247633	0.995914592968806
AC108488.3	Acute Lymphoblastic Leukemia	MR Egger	0.965210398176124	0.711278196738311	1.30979849659313	0.823231218003172			ENO2	Acute lymphocytic leukaemia	MR Egger	2.4146597924448	0.241523337059592	24.1408635050905	0.486762344056526
AC108488.3	Acute Lymphoblastic Leukemia	Weighted median	0.840063918952435	0.678778890461466	1.03967197248275	0.109088142119729			ENO2	Acute lymphocytic leukaemia	Weighted median	0.743288959264029	0.275719019185877	2.00377354668939	0.557647667715313
AC108488.3	Acute Lymphoblastic Leukemia	Inverse variance weighted	0.824540263664311	0.689535842149577	0.98597723982582	0.0344471083703293			ENO2	Acute lymphocytic leukaemia	Inverse variance weighted	0.635844988293329	0.267981583165902	1.50868147117204	0.304353220610248
AC108488.3	Acute Lymphoblastic Leukemia	Simple mode	0.525674097376238	0.286942474602679	0.963026672976713	0.0537574769922401			ENO2	Acute lymphocytic leukaemia	Simple mode	0.315443725051913	0.0589430276426177	1.68815121404931	0.226276784676267
AC108488.3	Acute Lymphoblastic Leukemia	Weighted mode	0.850270801552832	0.671039996386736	1.07737309231362	0.198028025574911			ENO2	Acute lymphocytic leukaemia	Weighted mode	0.962769123568943	0.278034386816868	3.33384800315454	0.954201673334165
AC127904.2	Acute Lymphoblastic Leukemia	MR Egger	1.34446022008245	0.857878425352672	2.10702732457815	0.220932485893233			IL10RA	Acute lymphocytic leukaemia	MR Egger	2.6620281877428	0.615981564387565	11.5042307790214	0.23118177542646
AC127904.2	Acute Lymphoblastic Leukemia	Weighted median	1.43918171065276	1.04085922771985	1.98993671873839	0.0276486506709101			IL10RA	Acute lymphocytic leukaemia	Weighted median	0.952872874305721	0.500204639607184	1.81519050942966	0.883278540154717
AC127904.2	Acute Lymphoblastic Leukemia	Inverse variance weighted	1.39330992953279	1.13027663622321	1.7175552404777	0.0018883975767386			IL10RA	Acute lymphocytic leukaemia	Inverse variance weighted	0.789516786992433	0.355505304698704	1.75338243537925	0.561539362755127
AC127904.2	Acute Lymphoblastic Leukemia	Simple mode	1.77150559967072	0.957743830667072	3.27669256556726	0.0914693532838485			IL10RA	Acute lymphocytic leukaemia	Simple mode	0.585606033368032	0.121058400134399	2.83280157292938	0.524552309117853
AC127904.2	Acute Lymphoblastic Leukemia	Weighted mode	1.71372299896811	1.10213988620364	2.66467673836606	0.0325791415197561			IL10RA	Acute lymphocytic leukaemia	Weighted mode	0.953315596298456	0.478350878131444	1.89988284268635	0.895269640716371
AC131056.3	Acute Lymphoblastic Leukemia	MR Egger	0.967807967230895	0.507009656678928	1.84740517088168	0.922762818321606			STAT3	Acute lymphocytic leukaemia	MR Egger	0.286237736057283	0.0325544302620604	2.51677086294102	0.310579828577886
AC131056.3	Acute Lymphoblastic Leukemia	Weighted median	1.62161338690069	1.14160004617212	2.30345994237902	0.00694397321663027			STAT3	Acute lymphocytic leukaemia	Weighted median	0.439168488634422	0.135826532533349	1.41996528816701	0.169326865209139
AC131056.3	Acute Lymphoblastic Leukemia	Inverse variance weighted	1.50765873758005	1.15270835227248	1.97190804119738	0.00272091981342109			STAT3	Acute lymphocytic leukaemia	Inverse variance weighted	0.445192329771804	0.161403463631086	1.22795512579988	0.117980905702905
AC131056.3	Acute Lymphoblastic Leukemia	Simple mode	1.44097504686857	0.847859203994583	2.4490022351767	0.201906776520821			STAT3	Acute lymphocytic leukaemia	Simple mode	0.884642992726443	0.136075340470486	5.7511759432249	0.902077654359872
AC131056.3	Acute Lymphoblastic Leukemia	Weighted mode	1.65776387811507	1.09001258792004	2.52123792517587	0.035861240747389			STAT3	Acute lymphocytic leukaemia	Weighted mode	0.454053088017059	0.129249411312946	1.59508816824434	0.264167231893877
AC131971.1	Acute Lymphoblastic Leukemia	MR Egger	1.65294	0.887187132575599	3.07964079895038	0.188596644838805			JUN	Acute lymphocytic leukaemia	MR Egger	1.15105850191892	0.061872204391373	21.414069336514	0.930800402031198
AC131971.1	Acute Lymphoblastic Leukemia	Weighted median	1.47032117753158	1.01399726992927	2.13200215543838	0.0420201702592995			JUN	Acute lymphocytic leukaemia	Weighted median	1.05221178832236	0.441405449556544	2.50823737812214	0.90857817764955
AC131971.1	Acute Lymphoblastic Leukemia	Inverse variance weighted	1.60056880741567	1.15415062202324	2.21965873291401	0.00481246170195839			JUN	Acute lymphocytic leukaemia	Inverse variance weighted	1.03182288388983	0.407160490407113	2.61483736463278	0.947352796025109
AC131971.1	Acute Lymphoblastic Leukemia	Simple mode	1.32241458398546	0.766269374568696	2.28220047672108	0.361562438045264			JUN	Acute lymphocytic leukaemia	Simple mode	0.553047044627522	0.0977720515602921	3.12830741188472	0.539566635884449
AC131971.1	Acute Lymphoblastic Leukemia	Weighted mode	1.44125311254101	0.951960761837402	2.18203377458529	0.144686309686136			JUN	Acute lymphocytic leukaemia	Weighted mode	1.01729421355866	0.392142532810871	2.63905960295067	0.973566277071946
AC144831.1	Acute Lymphoblastic Leukemia	MR Egger	1.91867790888269	0.878427885653616	4.19081062675428	0.177428478523848			SMAD3	Acute lymphocytic leukaemia	MR Egger	4.35926324059773	2.33392672648283e-06	8142147.64551069	0.860083144137576
AC144831.1	Acute Lymphoblastic Leukemia	Weighted median	1.85135152722323	1.12333540625458	3.05118351853588	0.0156809635686802			SMAD3	Acute lymphocytic leukaemia	Weighted median	1.83736877307004	0.0810393003297737	41.657862228761	0.702448471745645
AC144831.1	Acute Lymphoblastic Leukemia	Inverse variance weighted	1.75519722650426	1.17711138939546	2.61718417788009	0.00578057143475327			SMAD3	Acute lymphocytic leukaemia	Inverse variance weighted	0.637086892359124	0.0469729820906118	8.6407055790679	0.734673747726416
AC144831.1	Acute Lymphoblastic Leukemia	Simple mode	1.80780962679764	0.871238466267216	3.75118383000764	0.172730597879702			SMAD3	Acute lymphocytic leukaemia	Simple mode	2.09275336448834	0.0202263463028979	216.530290690701	0.775471557415433
AC144831.1	Acute Lymphoblastic Leukemia	Weighted mode	1.93350977601003	1.13160968507919	3.30366565717818	0.0606856640251696			SMAD3	Acute lymphocytic leukaemia	Weighted mode	2.09275336448834	0.0318338121932434	137.577510917992	0.752321217814005
ACACB	Acute Lymphoblastic Leukemia	MR Egger	1.10018829896896	0.753281196226686	1.60685584513644	0.6237315826142			SMAD2	Acute lymphocytic leukaemia	MR Egger	1.40369281802491	1.83982550149707e-07	10709458.7273165	0.973315674389653
ACACB	Acute Lymphoblastic Leukemia	Weighted median	1.17998334275302	0.810612134452996	1.71766573678812	0.387619964049759			SMAD2	Acute lymphocytic leukaemia	Weighted median	1.96755038524501	0.0671921939286585	57.6146467637013	0.69446144044703
ACACB	Acute Lymphoblastic Leukemia	Inverse variance weighted	1.31453877314897	1.0416230695929	1.65896113148431	0.0212520167800902			SMAD2	Acute lymphocytic leukaemia	Inverse variance weighted	1.95498399932741	0.0940734459355599	40.6274310419565	0.664966852955695
ACACB	Acute Lymphoblastic Leukemia	Simple mode	0.950287537290307	0.515240901788646	1.75266831572256	0.871037876799866			SMAD2	Acute lymphocytic leukaemia	Simple mode	2.03258248159678	0.0264170332097191	156.39120077171	0.779234867545302
ACACB	Acute Lymphoblastic Leukemia	Weighted mode	1.09926634027575	0.763049418966545	1.58362808073407	0.613854656376401			SMAD2	Acute lymphocytic leukaemia	Weighted mode	1.98516831509415	0.0601194815094951	65.5510184104188	0.737762252911631
ACAD8	Acute Lymphoblastic Leukemia	MR Egger	0.845088840201647	0.441341104788474	1.61819313924012	0.616630539578629			STAT1	Acute lymphocytic leukaemia	MR Egger	0.0181674831061229	6.40561518582228e-06	51.5262676318407	0.427242040004125
ACAD8	Acute Lymphoblastic Leukemia	Weighted median	1.24501965638061	0.815979406804198	1.89964836348628	0.309337768658642			STAT1	Acute lymphocytic leukaemia	Weighted median	0.30960744459358	0.0472081420822693	2.03051349872482	0.221760039208642
ACAD8	Acute Lymphoblastic Leukemia	Inverse variance weighted	1.41102156398275	1.02780533902072	1.93711958717912	0.0332019612587962			STAT1	Acute lymphocytic leukaemia	Inverse variance weighted	0.477330858458441	0.0943194894322487	2.41566986641014	0.371365349534688
ACAD8	Acute Lymphoblastic Leukemia	Simple mode	1.09200494208089	0.551178401890045	2.16350058246111	0.803039466772286			STAT1	Acute lymphocytic leukaemia	Simple mode	0.328955146219054	0.021185677047065	5.10776634532858	0.484914997198553
ACAD8	Acute Lymphoblastic Leukemia	Weighted mode	1.30937406803304	0.884645481513574	1.93801978969479	0.190994597029744			STAT1	Acute lymphocytic leukaemia	Weighted mode	0.276325505325412	0.0281494725745578	2.71251209737964	0.350305163869553
ACBD4	Acute Lymphoblastic Leukemia	MR Egger	2.74399115908455	0.0830921722518813	90.616086655066	0.601809793139016			STAT6	Acute lymphocytic leukaemia	MR Egger	1.2174721807936	0.144770422806747	10.2385451549379	0.860774894160191
ACBD4	Acute Lymphoblastic Leukemia	Weighted median	0.291263555890235	0.0746490268147193	1.13644427274833	0.0757558220814573			STAT6	Acute lymphocytic leukaemia	Weighted median	1.29575331899458	0.335355084779367	5.00656390759686	0.70713827027124
ACBD4	Acute Lymphoblastic Leukemia	Inverse variance weighted	0.247529116558519	0.0815096622834916	0.751698164705196	0.0137541996471089			STAT6	Acute lymphocytic leukaemia	Inverse variance weighted	1.39073797642006	0.420369072642882	4.60108091895734	0.588972814677901
ACBD4	Acute Lymphoblastic Leukemia	Simple mode	0.284507069580473	0.038721311879351	2.09043208281467	0.27158164459833			STAT6	Acute lymphocytic leukaemia	Simple mode	0.61094934575695	0.0703355612986549	5.3068333598126	0.665606566122941
ACBD4	Acute Lymphoblastic Leukemia	Weighted mode	0.296806008956521	0.0712321068956513	1.23671488591161	0.156146166293923			STAT6	Acute lymphocytic leukaemia	Weighted mode	1.04770332965613	0.156426928649145	7.01722060550431	0.962743299920054
ACD	Acute Lymphoblastic Leukemia	MR Egger	0.225103776826131	0.0294243127146859	1.7221034466541	0.246412342762547			ZNRF3	Acute lymphocytic leukaemia	MR Egger	0.146155124214571	0.00198036812120583	10.7865401919165	0.430345865727981
ACD	Acute Lymphoblastic Leukemia	Weighted median	0.342067339934714	0.137852549537524	0.848805955657429	0.0206937485364014			ZNRF3	Acute lymphocytic leukaemia	Weighted median	0.423407786491753	0.122549615832147	1.46286997673981	0.174262344951263
ACD	Acute Lymphoblastic Leukemia	Inverse variance weighted	0.354045584855568	0.155497144799772	0.806113040320631	0.0133826654627349			ZNRF3	Acute lymphocytic leukaemia	Inverse variance weighted	1.00523445254532	0.286679192628714	3.52483309066943	0.993492429624003
ACD	Acute Lymphoblastic Leukemia	Simple mode	0.387985611939441	0.112416601667358	1.33906231676929	0.208483134347468			ZNRF3	Acute lymphocytic leukaemia	Simple mode	0.449970361281921	0.0397996786816622	5.08731	0.547136813667617
ACD	Acute Lymphoblastic Leukemia	Weighted mode	0.34845863205615	0.125991547107206	0.963742576723213	0.112065491326742			ZNRF3	Acute lymphocytic leukaemia	Weighted mode	0.416932795311394	0.107122750319115	1.6227454512541	0.262694073578155
ACER1	Acute Lymphoblastic Leukemia	MR Egger	0.181807583459595	3.83962000477977e-05	860.866371210433	0.760599656173184			ANGPTL3	Acute lymphocytic leukaemia	MR Egger	0.989202676143554	0.486559701252642	2.01110353358566	0.976613622297605
ACER1	Acute Lymphoblastic Leukemia	Weighted median	0.167916819647798	0.041303317843567	0.682658435029875	0.0126489750015515			ANGPTL3	Acute lymphocytic leukaemia	Weighted median	1.04522695179615	0.527839278103916	2.06975764419332	0.899018435201873
ACER1	Acute Lymphoblastic Leukemia	Inverse variance weighted	0.157376795142273	0.0430025229549376	0.57595354754433	0.00521388236296288			ANGPTL3	Acute lymphocytic leukaemia	Inverse variance weighted	0.816566025125143	0.488308898111455	1.3654882718039	0.439817382751927
ACER1	Acute Lymphoblastic Leukemia	Simple mode	0.218614516584398	0.0324476207659254	1.47290635594517	0.258664085101833			ANGPTL3	Acute lymphocytic leukaemia	Simple mode	0.671107555213173	0.160715719436033	2.80237273768022	0.594462975917881
ACER1	Acute Lymphoblastic Leukemia	Weighted mode	0.110849925985033	0.0199395476644947	0.616247986044701	0.128511655247087			ANGPTL3	Acute lymphocytic leukaemia	Weighted mode	0.878613644514432	0.467201973615325	1.65230880844381	0.695038902890535
ACOT7	Acute Lymphoblastic Leukemia	MR Egger	0.741496771419319	0.250436084220418	2.19544026068288	0.612338519169683			STX12	Acute lymphocytic leukaemia	MR Egger	2.79086950651616	0.000463796297159151	16793.9085544898	0.855379109245003
ACOT7	Acute Lymphoblastic Leukemia	Weighted median	0.462575364227903	0.217382802547626	0.984327946290499	0.0453924845987432			STX12	Acute lymphocytic leukaemia	Weighted median	0.558886238727942	0.0720281247089414	4.33655366013843	0.57782259308028
ACOT7	Acute Lymphoblastic Leukemia	Inverse variance weighted	0.37815023612362	0.205348065930376	0.696366924287632	0.0017984484785619			STX12	Acute lymphocytic leukaemia	Inverse variance weighted	0.48228402208352	0.0476211686225353	4.88433788344679	0.53701753710743
ACOT7	Acute Lymphoblastic Leukemia	Simple mode	0.330767178290017	0.13474263104559	0.81196964453605	0.0522456525302874			STX12	Acute lymphocytic leukaemia	Simple mode	0.0464754611103197	0.000659962064350167	3.27286764208737	0.293002509700324
ACOT7	Acute Lymphoblastic Leukemia	Weighted mode	0.443772907095688	0.202006276412573	0.974892446757168	0.089487082511822			STX12	Acute lymphocytic leukaemia	Weighted mode	0.955649695403037	0.113206594643908	8.06725388389784	0.970539803246908
ACP6	Acute Lymphoblastic Leukemia	MR Egger	0.74850770478824	0.499425882311518	1.12181567670114	0.171178087952168			SCARA5	Acute lymphocytic leukaemia	MR Egger	0.914221646709329	0.111046072215886	7.5266166793097	0.93519433408168
ACP6	Acute Lymphoblastic Leukemia	Weighted median	0.605080245263523	0.423897071632046	0.863705195694225	0.00565751562370063			SCARA5	Acute lymphocytic leukaemia	Weighted median	1.06125094703567	0.336709316149705	3.3448839059842	0.919154643826937
ACP6	Acute Lymphoblastic Leukemia	Inverse variance weighted	0.602340662268781	0.478871215493426	0.757644773132903	1.48162110766773e-05			SCARA5	Acute lymphocytic leukaemia	Inverse variance weighted	0.997774849758687	0.399058387010437	2.49475937160276	0.996198605453166
ACP6	Acute Lymphoblastic Leukemia	Simple mode	0.535230308890608	0.295316589612678	0.970048732889868	0.0481419677432996			SCARA5	Acute lymphocytic leukaemia	Simple mode	0.860947908663253	0.145969672946374	5.07798151814686	0.871660465810487
ACP6	Acute Lymphoblastic Leukemia	Weighted mode	0.613258809740674	0.433047621936277	0.868464225811843	0.00989271467050169			SCARA5	Acute lymphocytic leukaemia	Weighted mode	1.0627913676408	0.289414444911831	3.90279583825164	0.928538004574906
ACSF2	Acute Lymphoblastic Leukemia	MR Egger	2.02899172410974	0.519490119347329	7.92470783020484	0.3306107268368			NPDC1	Acute lymphocytic leukaemia	MR Egger	0.161873060078954	1.98363823327447e-07	132095.092440675	0.836756422089012
ACSF2	Acute Lymphoblastic Leukemia	Weighted median	2.97074294195483	1.38183164798908	6.38667788512265	0.0053006658391761			NPDC1	Acute lymphocytic leukaemia	Weighted median	0.913172677457116	0.087007108054137	9.58409442060002	0.939636941453461
ACSF2	Acute Lymphoblastic Leukemia	Inverse variance weighted	2.82875942080958	1.54747593882742	5.17092360536623	0.000728263783489399			NPDC1	Acute lymphocytic leukaemia	Inverse variance weighted	1.03842979588499	0.127339582211856	8.46819521669004	0.971905009961076
ACSF2	Acute Lymphoblastic Leukemia	Simple mode	3.10326765257104	1.24759535701976	7.71906537589112	0.0313966824469346			NPDC1	Acute lymphocytic leukaemia	Simple mode	0.855545140679364	0.0406952512916594	17.9863120267816	0.929182133531792
ACSF2	Acute Lymphoblastic Leukemia	Weighted mode	2.88906410100148	1.27231007833684	6.56026508145427	0.0261497180077849			NPDC1	Acute lymphocytic leukaemia	Weighted mode	0.855545140679364	0.0489607741774591	14.9498756920608	0.924629903765869
ACSM1	Acute Lymphoblastic Leukemia	MR Egger	1.48544548318771	0.472335990154616	4.67156500778286	0.51381018990659			GOSR2	Acute lymphocytic leukaemia	MR Egger	0.410091106976691	0.0301928130179895	5.57002475791724	0.550984810682679
ACSM1	Acute Lymphoblastic Leukemia	Weighted median	1.81184942780904	0.806175531842711	4.07206398530642	0.15028443788425			GOSR2	Acute lymphocytic leukaemia	Weighted median	1.08936958717755	0.448900976769016	2.64362556305603	0.849901848999368
ACSM1	Acute Lymphoblastic Leukemia	Inverse variance weighted	2.11549154213617	1.12405454917112	3.98139437997006	0.0202075729189874			GOSR2	Acute lymphocytic leukaemia	Inverse variance weighted	1.14121182033064	0.492638025022626	2.64365386492963	0.757941208657511
ACSM1	Acute Lymphoblastic Leukemia	Simple mode	3.39267689704283	0.821609137471859	14.0094066664666	0.119442322598025			GOSR2	Acute lymphocytic leukaemia	Simple mode	1.69139137137889	0.305081568534373	9.37717996179976	0.579978658190934
ACSM1	Acute Lymphoblastic Leukemia	Weighted mode	1.72840874421379	0.714702359173675	4.17991734423356	0.249984941763014			GOSR2	Acute lymphocytic leukaemia	Weighted mode	1.07195258936753	0.403767792434691	2.84589899289111	0.895814477367301
ACSS1	Acute Lymphoblastic Leukemia	MR Egger	0.478576537803211	0.220958973168779	1.03655216735987	0.0750014870995378			SLC3A2	Acute lymphocytic leukaemia	MR Egger	0.994615440168562	0.0404885150826681	24.4330984182024	0.997895615040736
ACSS1	Acute Lymphoblastic Leukemia	Weighted median	0.526926978509934	0.299025773774213	0.92852210422255	0.0266524204849832			SLC3A2	Acute lymphocytic leukaemia	Weighted median	1.69815519053347	0.382136301690838	7.5463415497981	0.486510684210887
ACSS1	Acute Lymphoblastic Leukemia	Inverse variance weighted	0.488687906488959	0.325632772126743	0.733390157227816	0.000546030219521057			SLC3A2	Acute lymphocytic leukaemia	Inverse variance weighted	2.05834347594866	0.535207435980704	7.91614163061284	0.293522078205414
ACSS1	Acute Lymphoblastic Leukemia	Simple mode	0.392919749493811	0.159572255198098	0.967498575179124	0.053874639830225			SLC3A2	Acute lymphocytic leukaemia	Simple mode	1.62128636170578	0.233301214672188	11.2668486117681	0.673481950543625
ACSS1	Acute Lymphoblastic Leukemia	Weighted mode	0.558623565618682	0.30702882334718	1.01638759730275	0.0691183693491666			SLC3A2	Acute lymphocytic leukaemia	Weighted mode	1.52260017343538	0.255920447174789	9.0587184952912	0.689421443293281
ACTBP8	Acute Lymphoblastic Leukemia	MR Egger	0.915509617800028	0.769090856181663	1.08980343940843	0.325233101861157			AGA	Acute lymphocytic leukaemia	MR Egger	0.144443632482176	0.00548095531836724	3.80662890914815	0.330272025951077
ACTBP8	Acute Lymphoblastic Leukemia	Weighted median	0.869861195616759	0.760586074802034	0.994836120075904	0.0417916209105967			AGA	Acute lymphocytic leukaemia	Weighted median	0.4822988518303	0.105168498060865	2.2118047396874	0.348028199852984
ACTBP8	Acute Lymphoblastic Leukemia	Inverse variance weighted	0.903440282245746	0.822911954315183	0.991848932688684	0.0330213766923408			AGA	Acute lymphocytic leukaemia	Inverse variance weighted	0.825479669869668	0.224814943217713	3.03101153159666	0.772574843970748
ACTBP8	Acute Lymphoblastic Leukemia	Simple mode	0.837813406546209	0.666593472466095	1.05301256790249	0.134958219631806			AGA	Acute lymphocytic leukaemia	Simple mode	0.378039300810162	0.0455859419993169	3.13503915218376	0.418392120686654
ACTBP8	Acute Lymphoblastic Leukemia	Weighted mode	0.863842930734621	0.74629135629065	0.999910561324464	0.0549265425793719			AGA	Acute lymphocytic leukaemia	Weighted mode	0.365148912498379	0.060175442163735	2.21574987244718	0.334966781028537
ACTR1B	Acute Lymphoblastic Leukemia	MR Egger	1.2106742745394	0.662322555559198	2.2130186972026	0.543204367421682			CSF2RA	Acute lymphocytic leukaemia	MR Egger	16.5674954463587	0.0695041542102074	3949.14388188907	0.388834146984521
ACTR1B	Acute Lymphoblastic Leukemia	Weighted median	1.66644769012725	1.06653640014109	2.60380039871408	0.0249026681718754			CSF2RA	Acute lymphocytic leukaemia	Weighted median	0.977015171417205	0.193911203715293	4.92265855138988	0.977515558697121
ACTR1B	Acute Lymphoblastic Leukemia	Inverse variance weighted	1.56043026272418	1.08062641893676	2.25326955010151	0.017613682319375			CSF2RA	Acute lymphocytic leukaemia	Inverse variance weighted	0.743747518351445	0.187790633271241	2.94562280033936	0.673324473298859
ACTR1B	Acute Lymphoblastic Leukemia	Simple mode	1.41114690038527	0.570013844189302	3.49348633329972	0.466649473875845			CSF2RA	Acute lymphocytic leukaemia	Simple mode	1.53253914331371	0.143371141421321	16.381792057348	0.741778908284466
ACTR1B	Acute Lymphoblastic Leukemia	Weighted mode	1.65835586574868	1.05063799666386	2.61759443899395	0.0442827399879332			CSF2RA	Acute lymphocytic leukaemia	Weighted mode	1.47509159152618	0.170594821790311	12.7547552766037	0.741774881492226
ACTR5	Acute Lymphoblastic Leukemia	MR Egger	0.721276677196591	0.419058290854954	1.24145030994703	0.244901128107486			CLMP	Acute lymphocytic leukaemia	MR Egger	0.587519205171687	0.126640949468044	2.72564930929131	0.534224517943795
ACTR5	Acute Lymphoblastic Leukemia	Weighted median	0.831764539415503	0.555071067206711	1.24638499446674	0.372033579156183			CLMP	Acute lymphocytic leukaemia	Weighted median	0.94854603682756	0.398323861212902	2.25881417508243	0.905015327813092
ACTR5	Acute Lymphoblastic Leukemia	Inverse variance weighted	0.735978731390692	0.557576932874974	0.97146180396403	0.030431748940265			CLMP	Acute lymphocytic leukaemia	Inverse variance weighted	1.29678110686588	0.525220778398395	3.20177972442804	0.573040748450312
ACTR5	Acute Lymphoblastic Leukemia	Simple mode	0.613302819844542	0.316527241671055	1.18833483918634	0.154676969744609			CLMP	Acute lymphocytic leukaemia	Simple mode	1.35586888670353	0.0979324624453401	18.771920893511	0.829365490040443
ACTR5	Acute Lymphoblastic Leukemia	Weighted mode	0.753988182351535	0.494826364349152	1.14888417449931	0.195777672208231			CLMP	Acute lymphocytic leukaemia	Weighted mode	0.896073846531091	0.358538175432909	2.23950584193029	0.823675236264489
ACVR1B	Acute Lymphoblastic Leukemia	MR Egger	4.12482657250514	0.551210270361689	30.8669761216174	0.226117255687213			TMEM190	Acute lymphocytic leukaemia	MR Egger	1.11782236533825	0.469501245241678	2.66139196245837	0.806953639753508
ACVR1B	Acute Lymphoblastic Leukemia	Weighted median	4.69342672337209	1.48242294497567	14.8596286116071	0.00855061964179204			TMEM190	Acute lymphocytic leukaemia	Weighted median	0.845651583899081	0.46192846610305	1.54813278208208	0.586857600842963
ACVR1B	Acute Lymphoblastic Leukemia	Inverse variance weighted	4.71850289774783	1.78063942606874	12.5035250091083	0.00180584050425433			TMEM190	Acute lymphocytic leukaemia	Inverse variance weighted	1.00940476235678	0.640006956544279	1.59201078027354	0.96788016394479
ACVR1B	Acute Lymphoblastic Leukemia	Simple mode	4.36731034520151	0.793794100982362	24.028144864896	0.141098524372233			TMEM190	Acute lymphocytic leukaemia	Simple mode	2.26281863746613	0.788326488728591	6.49521265525678	0.159999026670111
ACVR1B	Acute Lymphoblastic Leukemia	Weighted mode	4.63732284097076	1.27572677422925	16.8568721499019	0.0586555567278519			TMEM190	Acute lymphocytic leukaemia	Weighted mode	0.598899327699756	0.304322329723632	1.1786200672325	0.168575864288962
ACYP2	Acute Lymphoblastic Leukemia	MR Egger	0.822690629126555	0.51455468309404	1.31535071682352	0.418917933181669			APOM	Acute lymphocytic leukaemia	MR Egger	0.410261576365415	0.0720653603873503	2.3355820346578	0.341579747550794
ACYP2	Acute Lymphoblastic Leukemia	Weighted median	1.31691992195009	0.903197558827871	1.92015364067158	0.15247917035674			APOM	Acute lymphocytic leukaemia	Weighted median	0.611300371432591	0.166076387673051	2.25009797810204	0.459149631421099
ACYP2	Acute Lymphoblastic Leukemia	Inverse variance weighted	1.33698664716922	1.05702565169202	1.69109736537371	0.0154085477445107			APOM	Acute lymphocytic leukaemia	Inverse variance weighted	0.995535993373371	0.342447126679763	2.89414580204294	0.993443741610201
ACYP2	Acute Lymphoblastic Leukemia	Simple mode	2.4039287195544	1.22338822344946	4.72366267545421	0.0140587720751301			APOM	Acute lymphocytic leukaemia	Simple mode	0.869867180474231	0.117983363081521	6.41335262789014	0.893921502426887
ACYP2	Acute Lymphoblastic Leukemia	Weighted mode	1.34821623203114	0.856896128406206	2.12124544394087	0.202257674981384			APOM	Acute lymphocytic leukaemia	Weighted mode	0.633440103450291	0.141354875117287	2.83857464644349	0.564001262147559
ADAM15	Acute Lymphoblastic Leukemia	MR Egger	1.25587651843593	0.882670755946371	1.78687899075994	0.212906937335712			PABPC3	Acute lymphocytic leukaemia	MR Egger	0.335371973520804	0.00044146589223951	254.774746136487	0.801201265590281
ADAM15	Acute Lymphoblastic Leukemia	Weighted median	1.12319909160957	0.831099799995227	1.51795993621922	0.449613803037268			PABPC3	Acute lymphocytic leukaemia	Weighted median	0.344484434811233	0.0549556293653364	2.15936978973197	0.25512968288848
ADAM15	Acute Lymphoblastic Leukemia	Inverse variance weighted	1.36905889282967	1.10840325500339	1.69101114019217	0.00355552752955151			PABPC3	Acute lymphocytic leukaemia	Inverse variance weighted	0.355620611442724	0.0704052791846073	1.79625762084254	0.210864398337894
ADAM15	Acute Lymphoblastic Leukemia	Simple mode	1.51568854117738	0.905543830958414	2.53694153205702	0.121421971323579			PABPC3	Acute lymphocytic leukaemia	Simple mode	0.207009753123014	0.0183633230119579	2.33362	0.330585646729211
ADAM15	Acute Lymphoblastic Leukemia	Weighted mode	1.20854707415841	0.891472343917448	1.63839746731629	0.229590339334352			PABPC3	Acute lymphocytic leukaemia	Weighted mode	0.304480841317415	0.0355827119657833	2.60543892265745	0.391048833064079
ADAM19	Acute Lymphoblastic Leukemia	MR Egger	0.689828253238891	0.373509652814581	1.27403	0.246244787536862			SHISA2	Acute lymphocytic leukaemia	MR Egger	0.831551333719178	0.170870773517485	4.04678697459858	0.828322403404907
ADAM19	Acute Lymphoblastic Leukemia	Weighted median	0.756669408847458	0.468397608479665	1.22235592992021	0.254503230555881			SHISA2	Acute lymphocytic leukaemia	Weighted median	1.03718022793347	0.517837808238379	2.07737405052689	0.917954393214601
ADAM19	Acute Lymphoblastic Leukemia	Inverse variance weighted	0.676660465502836	0.465249226118988	0.984137876797701	0.0409870836868766			SHISA2	Acute lymphocytic leukaemia	Inverse variance weighted	1.09812059461914	0.591988811751381	2.03697910566782	0.766528761951819
ADAM19	Acute Lymphoblastic Leukemia	Simple mode	0.655448436259532	0.239355798882928	1.79487045895719	0.418323124059653			SHISA2	Acute lymphocytic leukaemia	Simple mode	0.708367067623108	0.177386309425425	2.82876341538587	0.642824212173856
ADAM19	Acute Lymphoblastic Leukemia	Weighted mode	0.740681684616037	0.460707052961889	1.19079869604478	0.225952271034998			SHISA2	Acute lymphocytic leukaemia	Weighted mode	0.97895296739777	0.482013006287493	1.98822210163619	0.954986406347592
ADAM28	Acute Lymphoblastic Leukemia	MR Egger	0.447865831151624	0.127729997832441	1.57037349187357	0.23005238127021			NUCB1	Acute lymphocytic leukaemia	MR Egger	7.37985386507021	0.481863636176363	113.024181492414	0.224449574043392
ADAM28	Acute Lymphoblastic Leukemia	Weighted median	0.5292407235155	0.264455009436669	1.05914326986605	0.0722298276182659			NUCB1	Acute lymphocytic leukaemia	Weighted median	2.52976970516954	0.675781936708742	9.47011811585581	0.1681674220231
ADAM28	Acute Lymphoblastic Leukemia	Inverse variance weighted	0.573131867773684	0.338768205482227	0.969630952793132	0.0379902496489006			NUCB1	Acute lymphocytic leukaemia	Inverse variance weighted	1.59520467863712	0.524462263576054	4.85197533449751	0.410593825899956
ADAM28	Acute Lymphoblastic Leukemia	Simple mode	0.663650477372319	0.249667105836424	1.76407682798658	0.423956707021916			NUCB1	Acute lymphocytic leukaemia	Simple mode	2.50375485317854	0.342992778884773	18.2767356945467	0.406986803514092
ADAM28	Acute Lymphoblastic Leukemia	Weighted mode	0.612778314429556	0.284562704148152	1.3195589483843	0.229940770188197			NUCB1	Acute lymphocytic leukaemia	Weighted mode	2.55650340651766	0.621506143338322	10.5159212625492	0.250029506044166
ADAMTS13	Acute Lymphoblastic Leukemia	MR Egger	0.669624901772887	0.205129217453439	2.18592706900044	0.53584479934144			CEACAM20	Acute lymphocytic leukaemia	MR Egger	0.156016862898945	0.00447662573734846	5.43741267127813	0.492018627868725
ADAMTS13	Acute Lymphoblastic Leukemia	Weighted median	0.685113639991663	0.294859750315882	1.59187783073065	0.37930953356151			CEACAM20	Acute lymphocytic leukaemia	Weighted median	1.25001968804515	0.328340706034194	4.75892629754459	0.743533178748468
ADAMTS13	Acute Lymphoblastic Leukemia	Inverse variance weighted	0.437692842199733	0.198688253302232	0.964199045131611	0.0403179311757815			CEACAM20	Acute lymphocytic leukaemia	Inverse variance weighted	1.54731423139815	0.438369737242376	5.46155705397955	0.497531451748486
ADAMTS13	Acute Lymphoblastic Leukemia	Simple mode	0.687069207929234	0.215999946543734	2.18548246903813	0.54842372989372			CEACAM20	Acute lymphocytic leukaemia	Simple mode	1.50883902556848	0.180202411280955	12.6335446284845	0.740887183008257
ADAMTS13	Acute Lymphoblastic Leukemia	Weighted mode	0.687069207929234	0.280812933837475	1.68106251387167	0.442422872937569			CEACAM20	Acute lymphocytic leukaemia	Weighted mode	1.11498336894388	0.28422546196569	4.37394983694854	0.890305394716203
ADAMTSL4	Acute Lymphoblastic Leukemia	MR Egger	0.643376632355237	0.408646982244862	1.01293661533205	0.0985525715750424			IL31	Acute lymphocytic leukaemia	MR Egger	1.25385905471311	0.350480807768088	4.48573072830382	0.750925095318776
ADAMTSL4	Acute Lymphoblastic Leukemia	Weighted median	0.595778346857376	0.39312990631666	0.902886890264207	0.0146208984234063			IL31	Acute lymphocytic leukaemia	Weighted median	0.712526580180549	0.341481899822788	1.48673803129026	0.366423623228786
ADAMTSL4	Acute Lymphoblastic Leukemia	Inverse variance weighted	0.52474190004239	0.351524299222232	0.783314445884208	0.00160603566000013			IL31	Acute lymphocytic leukaemia	Inverse variance weighted	0.6918217387576	0.33562517285817	1.42604714104638	0.318125082683199
ADAMTSL4	Acute Lymphoblastic Leukemia	Simple mode	0.557741944725178	0.134372961227533	2.31501988245299	0.444610328770309			IL31	Acute lymphocytic leukaemia	Simple mode	0.121621335435568	0.0134577641089152	1.09912383018602	0.133922220066577
ADAMTSL4	Acute Lymphoblastic Leukemia	Weighted mode	0.602092964336155	0.392134353728255	0.924468703791044	0.0489978382735548			IL31	Acute lymphocytic leukaemia	Weighted mode	0.776499731219106	0.351326985079243	1.71621269697614	0.565762122267657
ADAR	Acute Lymphoblastic Leukemia	MR Egger	0.149432891247605	0.00403336555422844	5.5363662644484	0.342110662738477			ANTXR1	Acute lymphocytic leukaemia	MR Egger	0.934750336312837	0.0632475785788517	13.8148876347516	0.962736266278393
ADAR	Acute Lymphoblastic Leukemia	Weighted median	0.480724904418192	0.117644714181032	1.96435883530022	0.307781268810738			ANTXR1	Acute lymphocytic leukaemia	Weighted median	0.84108716590004	0.22829051433008	3.09880427015425	0.794782311912132
ADAR	Acute Lymphoblastic Leukemia	Inverse variance weighted	0.337155120688238	0.115043813506017	0.988089423864198	0.0474969591315928			ANTXR1	Acute lymphocytic leukaemia	Inverse variance weighted	1.30539881863799	0.483440815572661	3.52487009952376	0.598984274906398
ADAR	Acute Lymphoblastic Leukemia	Simple mode	0.552152513952238	0.0798096401326072	3.81999465424499	0.566242629717409			ANTXR1	Acute lymphocytic leukaemia	Simple mode	0.723023363139199	0.0846833220212314	6.17314922428354	0.776910364814402
ADAR	Acute Lymphoblastic Leukemia	Weighted mode	0.601589790828705	0.0900627938751125	4.01842160183455	0.616135349211284			ANTXR1	Acute lymphocytic leukaemia	Weighted mode	0.754152579372568	0.150422215584525	3.78099811097855	0.743266507014881
ADARB2	Acute Lymphoblastic Leukemia	MR Egger	1.45260440877998	0.982232871454154	2.14822740078244	0.0662559812011342			TMEM106A	Acute lymphocytic leukaemia	MR Egger	0.146425579660556	0.00910417746505551	2.35501235133262	0.224021404089539
ADARB2	Acute Lymphoblastic Leukemia	Weighted median	1.39752464720371	1.02383457733864	1.90760810659343	0.0349982282264755			TMEM106A	Acute lymphocytic leukaemia	Weighted median	0.219414465047233	0.0535119273293209	0.899663119507647	0.0351289526687317
ADARB2	Acute Lymphoblastic Leukemia	Inverse variance weighted	1.4366683467806	1.1478821304579	1.79810791010219	0.0015530005320903			TMEM106A	Acute lymphocytic leukaemia	Inverse variance weighted	0.397108162133589	0.123999262421651	1.27174	0.119897914144992
ADARB2	Acute Lymphoblastic Leukemia	Simple mode	1.74068439740465	0.940140420547695	3.22290383983577	0.0827262011108274			TMEM106A	Acute lymphocytic leukaemia	Simple mode	0.249940334899524	0.0226796842532669	2.75445505819542	0.294739697022092
ADARB2	Acute Lymphoblastic Leukemia	Weighted mode	1.50696314329517	1.06906426468536	2.12422956249354	0.0224476066479015			TMEM106A	Acute lymphocytic leukaemia	Weighted mode	0.215408521810411	0.0300338473285366	1.5449512931518	0.170534772591816
ADIPOR1	Acute Lymphoblastic Leukemia	MR Egger	17.2509999117034	0.348699950416291	853.447204676419	0.247888168202494			PGRMC2	Acute lymphocytic leukaemia	MR Egger	38.8733888263138	0.113700296927281	13290.557717789	0.434667711492179
ADIPOR1	Acute Lymphoblastic Leukemia	Weighted median	6.03563740945092	1.91195765329718	19.0532038591659	0.00217623609716975			PGRMC2	Acute lymphocytic leukaemia	Weighted median	10.7084293261632	1.40822508238351	81.4290698752113	0.0219786154710027
ADIPOR1	Acute Lymphoblastic Leukemia	Inverse variance weighted	7.11857938847539	2.47399059687875	20.4827668197116	0.000272757828922263			PGRMC2	Acute lymphocytic leukaemia	Inverse variance weighted	7.78833378205855	1.26432239209009	47.9768004428669	0.0269084829608808
ADIPOR1	Acute Lymphoblastic Leukemia	Simple mode	5.15939897739733	0.995922895942866	26.7283721625531	0.122235213298852			PGRMC2	Acute lymphocytic leukaemia	Simple mode	13.7729454188284	0.991551461012855	191.310318191912	0.189955444008097
ADIPOR1	Acute Lymphoblastic Leukemia	Weighted mode	5.7100815280704	1.53024815445704	21.3070219769549	0.06047755876166			PGRMC2	Acute lymphocytic leukaemia	Weighted mode	11.8873858008978	1.04902084092408	134.70651455781	0.183688794673489
ADK	Acute Lymphoblastic Leukemia	MR Egger	1.14305492083655	0.947722801664575	1.37864631910701	0.167221315820332			ACRV1	Acute lymphocytic leukaemia	MR Egger	0.189847923574426	0.00583855664452665	6.17314111687326	0.402566832980275
ADK	Acute Lymphoblastic Leukemia	Weighted median	1.27120332080464	1.05949377625099	1.52521696592008	0.00982930909709327			ACRV1	Acute lymphocytic leukaemia	Weighted median	1.01959112202119	0.220851930659669	4.70707253044748	0.980166713156279
ADK	Acute Lymphoblastic Leukemia	Inverse variance weighted	1.20433128467433	1.06359059223692	1.36369563047267	0.00336430961526336			ACRV1	Acute lymphocytic leukaemia	Inverse variance weighted	1.74766277642312	0.477441478659289	6.39727655978247	0.399074770037703
ADK	Acute Lymphoblastic Leukemia	Simple mode	1.43092250531235	1.01117850740538	2.02490381393018	0.0475619220613762			ACRV1	Acute lymphocytic leukaemia	Simple mode	7.36754783008624	0.750025635070182	72.3718743607068	0.14734115696959
ADK	Acute Lymphoblastic Leukemia	Weighted mode	1.21431271225099	1.03631993680157	1.42288	0.0194591247339109			ACRV1	Acute lymphocytic leukaemia	Weighted mode	1.04407268814435	0.2334903239399	4.66866360770287	0.957177072391039
ADO	Acute Lymphoblastic Leukemia	MR Egger	0.498264430709664	0.1233593906636	2.0125540631718	0.345901197407452			COL6A3	Acute lymphocytic leukaemia	MR Egger	0.674267833750413	0.000213716360417575	2127.29203670777	0.93914604870052
ADO	Acute Lymphoblastic Leukemia	Weighted median	0.539335804636202	0.256141486088162	1.13563450655728	0.104120094245649			COL6A3	Acute lymphocytic leukaemia	Weighted median	0.661099014762667	0.148420181244637	2.94469325973796	0.587136592792126
ADO	Acute Lymphoblastic Leukemia	Inverse variance weighted	0.567176780357173	0.327517315942908	0.982206083517139	0.0429615762795414			COL6A3	Acute lymphocytic leukaemia	Inverse variance weighted	0.801875970885819	0.149007545295772	4.31525176398112	0.797063797282775
ADO	Acute Lymphoblastic Leukemia	Simple mode	1.31009972788007	0.405430569135139	4.23342842808511	0.658643939825398			COL6A3	Acute lymphocytic leukaemia	Simple mode	0.746899644876684	0.126858484695385	4.39749127428454	0.777581188086242
ADO	Acute Lymphoblastic Leukemia	Weighted mode	0.560478749925896	0.265767415659143	1.18199753095913	0.150572418604638			COL6A3	Acute lymphocytic leukaemia	Weighted mode	0.624905718475672	0.145569201954297	2.68262209135557	0.591734275363998
ADRB1	Acute Lymphoblastic Leukemia	MR Egger	2.15946390938135	0.897381073579356	5.19654861598571	0.113716610940962			CSF2RB	Acute lymphocytic leukaemia	MR Egger	1.04236169122315	0.464818681970399	2.33750909219863	0.923075456138375
ADRB1	Acute Lymphoblastic Leukemia	Weighted median	1.98593155641761	1.00757	3.91430561569354	0.0475045017093308			CSF2RB	Acute lymphocytic leukaemia	Weighted median	1.25867500825743	0.701383710531391	2.25876756563329	0.440638999762385
ADRB1	Acute Lymphoblastic Leukemia	Inverse variance weighted	2.16831606180186	1.27360406984522	3.69156683398419	0.00436009778858103			CSF2RB	Acute lymphocytic leukaemia	Inverse variance weighted	1.43890311113241	0.862807116086776	2.39965819083289	0.163168676617457
ADRB1	Acute Lymphoblastic Leukemia	Simple mode	1.64352038858539	0.596726944909837	4.5266252692913	0.355429431110502			CSF2RB	Acute lymphocytic leukaemia	Simple mode	1.20934974548416	0.304872864846653	4.79716949436685	0.794669462649982
ADRB1	Acute Lymphoblastic Leukemia	Weighted mode	1.92261025233909	0.927485958476834	3.98542980474856	0.104272477591051			CSF2RB	Acute lymphocytic leukaemia	Weighted mode	1.20934974548416	0.679271620305667	2.15308098142606	0.538937310370045
ADSS	Acute Lymphoblastic Leukemia	MR Egger	0.914020050776908	0.645237270433512	1.29476812872406	0.615774035344926			PTGDS	Acute lymphocytic leukaemia	MR Egger	1.19645220623469	0.0628233209833776	22.7860905694976	0.915941925622724
ADSS	Acute Lymphoblastic Leukemia	Weighted median	0.775308436223002	0.580517141922691	1.03546153570536	0.0847178280887647			PTGDS	Acute lymphocytic leukaemia	Weighted median	2.39925552111764	0.728277916365792	7.90416258169523	0.150224165259541
ADSS	Acute Lymphoblastic Leukemia	Inverse variance weighted	0.789745321183203	0.637397270580863	0.978506970640747	0.0308731678730123			PTGDS	Acute lymphocytic leukaemia	Inverse variance weighted	2.98004420783512	0.973676202554018	9.12075642534659	0.0557149859464646
ADSS	Acute Lymphoblastic Leukemia	Simple mode	0.808230994658674	0.529235832514828	1.23430293376563	0.33042562589815			PTGDS	Acute lymphocytic leukaemia	Simple mode	8.48996364483042	0.941785555429109	76.5349205825316	0.15264530302691
ADSS	Acute Lymphoblastic Leukemia	Weighted mode	0.834534984367545	0.637352229901409	1.09272174389516	0.196109796221848			PTGDS	Acute lymphocytic leukaemia	Weighted mode	1.92420851523151	0.47903956568661	7.72917035523469	0.424265011402286
ADTRP	Acute Lymphoblastic Leukemia	MR Egger	1.26782151358516	0.735174207157315	2.18638164214787	0.408838385468114			MXRA8	Acute lymphocytic leukaemia	MR Egger	0.428550408473865	0.0102477728730207	17.9214991275447	0.666930273979907
ADTRP	Acute Lymphoblastic Leukemia	Weighted median	1.64168478562944	1.08318535171539	2.48815120246875	0.0194575765982427			MXRA8	Acute lymphocytic leukaemia	Weighted median	1.36002751161077	0.453962786139241	4.07450762224118	0.582803969966918
ADTRP	Acute Lymphoblastic Leukemia	Inverse variance weighted	1.37120812375921	1.02839642509014	1.82829468558144	0.0314947673046074			MXRA8	Acute lymphocytic leukaemia	Inverse variance weighted	1.50386913009726	0.648721628464932	3.48628	0.341503662056896
ADTRP	Acute Lymphoblastic Leukemia	Simple mode	1.59719952057934	0.816388648475353	3.12479394869476	0.193012563173716			MXRA8	Acute lymphocytic leukaemia	Simple mode	0.957153799241479	0.194975204526313	4.69876873640494	0.958041826638952
ADTRP	Acute Lymphoblastic Leukemia	Weighted mode	1.59719952057934	1.0388572145409	2.45562746528767	0.0510408384854966			MXRA8	Acute lymphocytic leukaemia	Weighted mode	1.14759401265357	0.251392467644258	5.23870913961492	0.862502803114624
AEN	Acute Lymphoblastic Leukemia	MR Egger	1.43744790823318	0.826903397522965	2.49878824427801	0.224763964398513			DHX9	Acute lymphocytic leukaemia	MR Egger	2.76301843159127	0.207304925547601	36.8262878132151	0.497815903562669
AEN	Acute Lymphoblastic Leukemia	Weighted median	1.42683485314969	0.912273762385924	2.23163022121584	0.119314706204949			DHX9	Acute lymphocytic leukaemia	Weighted median	1.13802944492516	0.449359005221592	2.88212988382864	0.785064723405734
AEN	Acute Lymphoblastic Leukemia	Inverse variance weighted	1.84687570744477	1.26310457310373	2.70044931463445	0.00155089356209756			DHX9	Acute lymphocytic leukaemia	Inverse variance weighted	1.1825764800404	0.455437687574558	3.07064428197063	0.730498581286302
AEN	Acute Lymphoblastic Leukemia	Simple mode	2.55932618453327	0.948753459794302	6.90395428993509	0.0881521358066111			DHX9	Acute lymphocytic leukaemia	Simple mode	1.03986530425555	0.215358597177908	5.02102012719377	0.963522268009015
AEN	Acute Lymphoblastic Leukemia	Weighted mode	1.49485951860097	0.910324999014975	2.45473318075403	0.13810861453508			DHX9	Acute lymphocytic leukaemia	Weighted mode	1.12587810225895	0.36855528593944	3.43937951646826	0.845321898500425
AFF4	Acute Lymphoblastic Leukemia	MR Egger	2.06282869171097	0.310088639200998	13.7227285150158	0.487617578863359			PSMB6	Acute lymphocytic leukaemia	MR Egger	0.113067395411924	0.00161884887862445	7.89711508840736	0.498050763021544
AFF4	Acute Lymphoblastic Leukemia	Weighted median	3.73053006470614	1.34577696376584	10.3411300225658	0.0113774535504968			PSMB6	Acute lymphocytic leukaemia	Weighted median	1.7516379844155	0.338701847195164	9.05880984664141	0.503732733671528
AFF4	Acute Lymphoblastic Leukemia	Inverse variance weighted	4.3441066779528	1.8763313941091	10.0575318883871	0.00060518155408797			PSMB6	Acute lymphocytic leukaemia	Inverse variance weighted	2.03073619769045	0.420305144191461	9.81165603514886	0.378065761374777
AFF4	Acute Lymphoblastic Leukemia	Simple mode	4.4325787625478	0.965844275800691	20.3425696858861	0.103941687342989			PSMB6	Acute lymphocytic leukaemia	Simple mode	5.41807302682525	0.294549709810524	99.6623467831452	0.373312651817571
AFF4	Acute Lymphoblastic Leukemia	Weighted mode	3.51492187220493	1.25420449227215	9.85060717277655	0.0539675823491922			PSMB6	Acute lymphocytic leukaemia	Weighted mode	1.26163782091118	0.231166574589291	6.88564077216396	0.813523956029442
AGAP1	Acute Lymphoblastic Leukemia	MR Egger	2.34502740317324	1.04105623738003	5.28228286252131	0.0506993693537752			CD99L2	Acute lymphocytic leukaemia	MR Egger	1.32774770020745	0.0079878180385707	220.70031476601	0.923389489814752
AGAP1	Acute Lymphoblastic Leukemia	Weighted median	1.64984803911945	0.921264591548107	2.95463277017106	0.0921527864746			CD99L2	Acute lymphocytic leukaemia	Weighted median	0.996475701271413	0.273569409993669	3.62965955604222	0.995728841110537
AGAP1	Acute Lymphoblastic Leukemia	Inverse variance weighted	1.58269961523094	1.07213891440627	2.33639320277759	0.0208585598028041			CD99L2	Acute lymphocytic leukaemia	Inverse variance weighted	0.882859836451661	0.174995057226868	4.45407717892835	0.880066189608684
AGAP1	Acute Lymphoblastic Leukemia	Simple mode	1.66260880254245	0.65220344859955	4.23835236723637	0.297136108542408			CD99L2	Acute lymphocytic leukaemia	Simple mode	0.52784636567977	0.0699502109244537	3.98314432621587	0.579362427021421
AGAP1	Acute Lymphoblastic Leukemia	Weighted mode	1.79728491850649	0.99560967825965	3.24447737785897	0.0630544789852754			CD99L2	Acute lymphocytic leukaemia	Weighted mode	1.05108797715184	0.280525361517933	3.93827470619811	0.94571781468102
AGXT2L2	Acute Lymphoblastic Leukemia	MR Egger	12.6884397040828	0.204389889348109	787.693083242209	0.31418364135874			TSPEAR	Acute lymphocytic leukaemia	MR Egger	0.310409512151574	0.0306505867569495	3.14362873370871	0.426376501136639
AGXT2L2	Acute Lymphoblastic Leukemia	Weighted median	3.40715834682243	0.948378477148498	12.2406067620027	0.0602758763602789			TSPEAR	Acute lymphocytic leukaemia	Weighted median	1.19335856461062	0.488819125017301	2.9133570902716	0.697875835036903
AGXT2L2	Acute Lymphoblastic Leukemia	Inverse variance weighted	3.0884137049232	1.08003926872569	8.83143741987403	0.0354100219340459			TSPEAR	Acute lymphocytic leukaemia	Inverse variance weighted	1.43366896322118	0.608840632028804	3.37593548783788	0.409699879211861
AGXT2L2	Acute Lymphoblastic Leukemia	Simple mode	5.81633116735446	0.904424	37.4046975642879	0.137318685293815			TSPEAR	Acute lymphocytic leukaemia	Simple mode	1.74109643641994	0.280253771862563	10.8166851092403	0.59372447184773
AGXT2L2	Acute Lymphoblastic Leukemia	Weighted mode	3.61706441092966	0.802057384527327	16.3119936368695	0.169647611168119			TSPEAR	Acute lymphocytic leukaemia	Weighted mode	1.06969659516883	0.381797357481139	2.99701080506382	0.906117339882346
AHI1	Acute Lymphoblastic Leukemia	MR Egger	0.707186855217862	0.540332996568513	0.925564885670489	0.014719023268614			BMPR1B	Acute lymphocytic leukaemia	MR Egger	0.328665197810251	0.00295655833027645	36.5359990180038	0.688895534163491
AHI1	Acute Lymphoblastic Leukemia	Weighted median	0.709280709439873	0.560215997203148	0.898009209474791	0.00432149276582649			BMPR1B	Acute lymphocytic leukaemia	Weighted median	1.1003649713748	0.411779242426809	2.94041793630205	0.848746883019412
AHI1	Acute Lymphoblastic Leukemia	Inverse variance weighted	0.693547980907337	0.583526812853004	0.824313109913281	3.29105007746264e-05			BMPR1B	Acute lymphocytic leukaemia	Inverse variance weighted	1.14051176244585	0.362225059878933	3.59104662916504	0.822231881925757
AHI1	Acute Lymphoblastic Leukemia	Simple mode	0.836339025551286	0.531349156268933	1.31639047019782	0.443409882342363			BMPR1B	Acute lymphocytic leukaemia	Simple mode	1.32153016910603	0.204743153089134	8.52991644168488	0.788603166631978
AHI1	Acute Lymphoblastic Leukemia	Weighted mode	0.685703045585106	0.558744832801743	0.841508751619229	0.000675625649647529			BMPR1B	Acute lymphocytic leukaemia	Weighted mode	1.04792533439199	0.339936974389942	3.23044443291678	0.940177911218802
AIMP2	Acute Lymphoblastic Leukemia	MR Egger	0.654493546914304	0.233855729311723	1.83173533619727	0.428994814325728			LAT	Acute lymphocytic leukaemia	MR Egger	0.132658929450849	1.72370381067736e-05	1020.96377892962	0.701419716118416
AIMP2	Acute Lymphoblastic Leukemia	Weighted median	0.789430475342023	0.442494973368887	1.40837865491231	0.423387439607933			LAT	Acute lymphocytic leukaemia	Weighted median	1.36782208812888	0.172420622692876	10.8510063097606	0.766904330732396
AIMP2	Acute Lymphoblastic Leukemia	Inverse variance weighted	0.6081779071416	0.375025385344331	0.986280879081105	0.0437997373228295			LAT	Acute lymphocytic leukaemia	Inverse variance weighted	1.03710405804387	0.177111956541722	6.07290918249036	0.967772396056433
AIMP2	Acute Lymphoblastic Leukemia	Simple mode	0.428576514423573	0.13933063770168	1.31828743301047	0.154257208242065			LAT	Acute lymphocytic leukaemia	Simple mode	2.13083660864443	0.111301948793916	40.7941163828706	0.650015235158126
AIMP2	Acute Lymphoblastic Leukemia	Weighted mode	0.821343520172687	0.430045528224685	1.56868315993092	0.557430675197657			LAT	Acute lymphocytic leukaemia	Weighted mode	2.0638653473028	0.0944533924851335	45.0967409399058	0.67650831768089
AK3	Acute Lymphoblastic Leukemia	MR Egger	1.03136240250837	0.676690062819512	1.57192851462273	0.886949425331926			KLRC4	Acute lymphocytic leukaemia	MR Egger	0.000179313447288148	1.16977637144228e-12	27486.717259228	0.534509912028502
AK3	Acute Lymphoblastic Leukemia	Weighted median	1.22656604782558	0.839332981802988	1.79245222372497	0.291380982212178			KLRC4	Acute lymphocytic leukaemia	Weighted median	0.971234380870202	0.107279205340733	8.79290837015705	0.979284143025926
AK3	Acute Lymphoblastic Leukemia	Inverse variance weighted	1.35217324921752	1.03661820383903	1.76378582695948	0.0260647646910283			KLRC4	Acute lymphocytic leukaemia	Inverse variance weighted	1.91922796937535	0.242713561412752	15.1760617618259	0.536616469002792
AK3	Acute Lymphoblastic Leukemia	Simple mode	1.00084182707672	0.522490933880198	1.91713252397972	0.997994813208117			KLRC4	Acute lymphocytic leukaemia	Simple mode	0.823751966060436	0.0521191376703552	13.019541993965	0.903110475020644
AK3	Acute Lymphoblastic Leukemia	Weighted mode	1.23112746442437	0.874771386025064	1.73265250541304	0.243791660234796			KLRC4	Acute lymphocytic leukaemia	Weighted mode	0.812257814648381	0.0632509166298563	10.4308805723447	0.887818149610758
AK5	Acute Lymphoblastic Leukemia	MR Egger	0.937953772672244	0.563868769362813	1.56021636144922	0.806930298605962			TEX29	Acute lymphocytic leukaemia	MR Egger	0.200989238098368	0.051152953870268	0.789723188494934	0.0612576063322883
AK5	Acute Lymphoblastic Leukemia	Weighted median	0.958723658580035	0.622497200741366	1.47655451691416	0.848284806614434			TEX29	Acute lymphocytic leukaemia	Weighted median	0.431644359308352	0.212279837405997	0.877694533778901	0.0203253124084128
AK5	Acute Lymphoblastic Leukemia	Inverse variance weighted	0.638436828356548	0.470940078500919	0.865506255274411	0.00384789846229788			TEX29	Acute lymphocytic leukaemia	Inverse variance weighted	0.498192605603491	0.259176924666332	0.957631056844764	0.0366312978392035
AK5	Acute Lymphoblastic Leukemia	Simple mode	0.319497341581491	0.114244346482509	0.893510746225578	0.037961134463953			TEX29	Acute lymphocytic leukaemia	Simple mode	3.05314654709373	0.498581303514644	18.6964568713647	0.266547995262691
AK5	Acute Lymphoblastic Leukemia	Weighted mode	0.916507419207638	0.57682025687078	1.4562350046781	0.714774356284956			TEX29	Acute lymphocytic leukaemia	Weighted mode	0.415262603819746	0.200404047892112	0.860476781506879	0.0500275445173677
AKAP12	Acute Lymphoblastic Leukemia	MR Egger	0.269055440700431	0.0196997252171727	3.67471268621547	0.428756107360182			PCDH9	Acute lymphocytic leukaemia	MR Egger	0.503707740095203	0.150929277587712	1.68106209402856	0.280259393807602
AKAP12	Acute Lymphoblastic Leukemia	Weighted median	0.234777632458148	0.0420485018596046	1.31087991878271	0.0986372704730971			PCDH9	Acute lymphocytic leukaemia	Weighted median	0.901772095881898	0.439545404408916	1.85007715870623	0.777943395088774
AKAP12	Acute Lymphoblastic Leukemia	Inverse variance weighted	0.210234338775483	0.0473040228075304	0.934349228187176	0.0404398991371676			PCDH9	Acute lymphocytic leukaemia	Inverse variance weighted	0.911650406952918	0.473532455450068	1.75512038284155	0.781953110878288
AKAP12	Acute Lymphoblastic Leukemia	Simple mode	0.249508981054882	0.0191346247668116	3.25351201738874	0.367093346341809			PCDH9	Acute lymphocytic leukaemia	Simple mode	0.915947149269166	0.195688616624483	4.28721503951471	0.912459635110292
AKAP12	Acute Lymphoblastic Leukemia	Weighted mode	0.239554372334018	0.0385932195191949	1.48695283832963	0.222559013581064			PCDH9	Acute lymphocytic leukaemia	Weighted mode	0.695709753711522	0.313473736493672	1.54402747363532	0.384152724326133
AKAP6	Acute Lymphoblastic Leukemia	MR Egger	0.471114771090662	0.042905817051954	5.17293790888663	0.571418365185089			ITM2C	Acute lymphocytic leukaemia	MR Egger	900.326794307261	0.144106908607295	5624909.62009684	0.369384136187208
AKAP6	Acute Lymphoblastic Leukemia	Weighted median	2.70078236390998	1.06477341343334	6.85049540604805	0.0364240379829962			ITM2C	Acute lymphocytic leukaemia	Weighted median	9.52886202876645	1.28852628923026	70.4674885737169	0.0272215147999494
AKAP6	Acute Lymphoblastic Leukemia	Inverse variance weighted	3.29062988061057	1.5129260468794	7.15715420030061	0.00266110219188434			ITM2C	Acute lymphocytic leukaemia	Inverse variance weighted	7.23432809254045	0.41640319544885	125.684681391809	0.174295400302913
AKAP6	Acute Lymphoblastic Leukemia	Simple mode	3.69969136147088	0.874476798598069	15.6524634982722	0.135589738259902			ITM2C	Acute lymphocytic leukaemia	Simple mode	64.9632691490842	1.18598261378729	3558.42175886505	0.177708824785532
AKAP6	Acute Lymphoblastic Leukemia	Weighted mode	2.37212034340897	0.783219406767843	7.18439159575444	0.187094279803395			ITM2C	Acute lymphocytic leukaemia	Weighted mode	1.05520100330034	0.0942151013839495	11.818160157027	0.969190692047387
AKD1	Acute Lymphoblastic Leukemia	MR Egger	0.531517979922369	0.272062360304128	1.03840664568574	0.0818193593391978			PGLYRP3	Acute lymphocytic leukaemia	MR Egger	1.18961	0.126277430242992	11.2067842767663	0.886749719150522
AKD1	Acute Lymphoblastic Leukemia	Weighted median	0.462003263720824	0.27011687184161	0.790202456564258	0.00480412968255653			PGLYRP3	Acute lymphocytic leukaemia	Weighted median	0.626727895657124	0.212831154493226	1.84553739855463	0.396466531038227
AKD1	Acute Lymphoblastic Leukemia	Inverse variance weighted	0.49406890665181	0.331479783796636	0.736407154983164	0.000534956150226571			PGLYRP3	Acute lymphocytic leukaemia	Inverse variance weighted	0.58366595381967	0.236584416499059	1.43993400194886	0.242545940107952
AKD1	Acute Lymphoblastic Leukemia	Simple mode	0.426894315167838	0.167010128946657	1.09118385496741	0.0923433803830928			PGLYRP3	Acute lymphocytic leukaemia	Simple mode	0.207251690628715	0.025169527791879	1.70655816921284	0.203301612893508
AKD1	Acute Lymphoblastic Leukemia	Weighted mode	0.482320427538012	0.278031182262026	0.83671548251451	0.0183181121486621			PGLYRP3	Acute lymphocytic leukaemia	Weighted mode	1.06162443267631	0.33273134092055	3.38725661651579	0.923458472316946
AKIP1	Acute Lymphoblastic Leukemia	MR Egger	1.01748524605575	0.737260793318678	1.40421983011055	0.916365569687746			SLITRK3	Acute lymphocytic leukaemia	MR Egger	1.8686304921364	0.280829412289569	12.4338112866236	0.524593933594046
AKIP1	Acute Lymphoblastic Leukemia	Weighted median	0.819505597997255	0.607545889004824	1.1054134960059	0.192355207944716			SLITRK3	Acute lymphocytic leukaemia	Weighted median	0.864559049957941	0.325695206541183	2.29497498229119	0.770143547589208
AKIP1	Acute Lymphoblastic Leukemia	Inverse variance weighted	0.760225248541833	0.636877017144254	0.907463156877566	0.00240515554703666			SLITRK3	Acute lymphocytic leukaemia	Inverse variance weighted	0.974842946054188	0.444997323023775	2.13556064340826	0.949224750573748
AKIP1	Acute Lymphoblastic Leukemia	Simple mode	0.774416128974807	0.45019773293771	1.3321265233899	0.359313556320027			SLITRK3	Acute lymphocytic leukaemia	Simple mode	1.92305793651456	0.275802780301453	13.4086821864143	0.515820494310603
AKIP1	Acute Lymphoblastic Leukemia	Weighted mode	0.84768254657819	0.635681998767904	1.13038547759104	0.264916869557949			SLITRK3	Acute lymphocytic leukaemia	Weighted mode	1.97282726716576	0.385934412449872	10.0847379775398	0.422731161429613
AKIRIN2	Acute Lymphoblastic Leukemia	MR Egger	1.57158449412419	0.429311602469008	5.75311221026195	0.543714758303681			SCGB1A1	Acute lymphocytic leukaemia	MR Egger	0.750867598054956	0.268162629432378	2.10246353491619	0.60239823732511
AKIRIN2	Acute Lymphoblastic Leukemia	Weighted median	2.86560162148185	0.945322561743648	8.6866356367217	0.0627973272510575			SCGB1A1	Acute lymphocytic leukaemia	Weighted median	0.862505081337158	0.453349691152949	1.64092979404157	0.652170016537239
AKIRIN2	Acute Lymphoblastic Leukemia	Inverse variance weighted	3.16986984113225	1.19448147313421	8.41208092022943	0.0205097830078784			SCGB1A1	Acute lymphocytic leukaemia	Inverse variance weighted	0.879988880456965	0.501130513232638	1.54526696994085	0.656288727514117
AKIRIN2	Acute Lymphoblastic Leukemia	Simple mode	5.22574572403115	0.780258356002865	34.9992001522757	0.163535328083198			SCGB1A1	Acute lymphocytic leukaemia	Simple mode	0.711806465597086	0.186916030623672	2.7106741073799	0.631681194789169
AKIRIN2	Acute Lymphoblastic Leukemia	Weighted mode	1.47230278585111	0.450322148801867	4.81361065404466	0.556978730302927			SCGB1A1	Acute lymphocytic leukaemia	Weighted mode	0.848687252452199	0.434697650910333	1.65694489253965	0.643642021820524
AKR1E2	Acute Lymphoblastic Leukemia	MR Egger	0.237673713913071	0.0727373921801245	0.776612861584939	0.0334018335472995			MGAT1	Acute lymphocytic leukaemia	MR Egger	26845.4518180734	3.84840223075011e-05	18726688118981.6	0.429809797184802
AKR1E2	Acute Lymphoblastic Leukemia	Weighted median	0.413349089207011	0.193448736334742	0.883218328459978	0.0225742148153301			MGAT1	Acute lymphocytic leukaemia	Weighted median	0.497717793287325	0.0543513162963093	4.55781053037028	0.53689256985877
AKR1E2	Acute Lymphoblastic Leukemia	Inverse variance weighted	0.489239684573169	0.27670971448024	0.865005659128553	0.0139416024785144			MGAT1	Acute lymphocytic leukaemia	Inverse variance weighted	0.436871813260171	0.0600809123028101	3.17666583122612	0.41328893732386
AKR1E2	Acute Lymphoblastic Leukemia	Simple mode	1.1866361199871	0.359189193837278	3.92023286172676	0.783073924530225			MGAT1	Acute lymphocytic leukaemia	Simple mode	0.937062223116072	0.0368305759418448	23.8412131099369	0.971070448646537
AKR1E2	Acute Lymphoblastic Leukemia	Weighted mode	0.415627149691686	0.197961995052574	0.872621674250951	0.0359553002858975			MGAT1	Acute lymphocytic leukaemia	Weighted mode	0.708667371380051	0.0621893905030822	8.07548424572228	0.799492263048901
AKT1	Acute Lymphoblastic Leukemia	MR Egger	0.915634914807343	0.395241314495002	2.12120359503776	0.840269123296218			CST8	Acute lymphocytic leukaemia	MR Egger	1.13257779860264	0.562860604960881	2.2789522993473	0.735130777537818
AKT1	Acute Lymphoblastic Leukemia	Weighted median	0.596673935932228	0.334845592767094	1.06323569284214	0.0797794808916222			CST8	Acute lymphocytic leukaemia	Weighted median	1.55087357787949	0.815845921230096	2.94811654011614	0.180580883007825
AKT1	Acute Lymphoblastic Leukemia	Inverse variance weighted	0.619188200392146	0.396155151466686	0.967787560215798	0.0354048686923102			CST8	Acute lymphocytic leukaemia	Inverse variance weighted	1.20427130000511	0.725737055401354	1.99833996792951	0.471919032945912
AKT1	Acute Lymphoblastic Leukemia	Simple mode	0.211571892164006	0.0836376716151647	0.535197413909613	0.00547378989065665			CST8	Acute lymphocytic leukaemia	Simple mode	0.765736135845416	0.191144601958051	3.06758246758207	0.714073713444819
AKT1	Acute Lymphoblastic Leukemia	Weighted mode	0.598746534456714	0.332509725930076	1.07815616978167	0.109471013460634			CST8	Acute lymphocytic leukaemia	Weighted mode	1.12599252388928	0.636825170317365	1.9909061748026	0.691805027760333
AKTIP	Acute Lymphoblastic Leukemia	MR Egger	1.71970506452547	1.09929603537123	2.69025395689326	0.0246545713914221			AXL	Acute lymphocytic leukaemia	MR Egger	1.3163797304156	0.467156268639785	3.70937031348117	0.625215559942585
AKTIP	Acute Lymphoblastic Leukemia	Weighted median	1.29068	0.922061354333529	1.80665083387951	0.136988946283346			AXL	Acute lymphocytic leukaemia	Weighted median	1.13415461010756	0.564091027940847	2.28031756563079	0.723879377745726
AKTIP	Acute Lymphoblastic Leukemia	Inverse variance weighted	1.37776285873477	1.09381372893506	1.73542390691798	0.00649804601460882			AXL	Acute lymphocytic leukaemia	Inverse variance weighted	1.15598152257508	0.630874636411773	2.11815977915269	0.638979738515183
AKTIP	Acute Lymphoblastic Leukemia	Simple mode	1.47413174068498	0.878177311804067	2.47451666045748	0.152749506087227			AXL	Acute lymphocytic leukaemia	Simple mode	0.661406220231096	0.244250767193274	1.79102073327052	0.447082744942954
AKTIP	Acute Lymphoblastic Leukemia	Weighted mode	1.31466380928145	0.940801491085403	1.8370941668475	0.119872647963208			AXL	Acute lymphocytic leukaemia	Weighted mode	1.11927912531115	0.555161062999281	2.25661676197005	0.763439137460552
AL161915.1	Acute Lymphoblastic Leukemia	MR Egger	0.744506624143818	0.492707352888739	1.12498851528037	0.194792293313067			PUF60	Acute lymphocytic leukaemia	MR Egger	0.383015890156502	0.000656265993881925	223.539195204395	0.795586701325937
AL161915.1	Acute Lymphoblastic Leukemia	Weighted median	0.657550632558153	0.456137247479202	0.947900739891543	0.0246563158989875			PUF60	Acute lymphocytic leukaemia	Weighted median	0.343924870784992	0.040438188828771	2.9250646522605	0.328440328264599
AL161915.1	Acute Lymphoblastic Leukemia	Inverse variance weighted	0.751618284415664	0.565017299653327	0.999845572541876	0.0498719396828984			PUF60	Acute lymphocytic leukaemia	Inverse variance weighted	0.538396381194351	0.0849088604330571	3.41390358797371	0.511158592985062
AL161915.1	Acute Lymphoblastic Leukemia	Simple mode	0.77596790813067	0.39027269072455	1.54283455839769	0.486032468657518			PUF60	Acute lymphocytic leukaemia	Simple mode	0.452874009354757	0.0326788834710905	6.27606718970344	0.596333297185648
AL161915.1	Acute Lymphoblastic Leukemia	Weighted mode	0.655319177841536	0.437420534277488	0.981762837348829	0.067593801637228			PUF60	Acute lymphocytic leukaemia	Weighted mode	0.287102002295137	0.0350530844466588	2.35150660842155	0.328903604134592
AL513477.1	Acute Lymphoblastic Leukemia	MR Egger	0.388017037760106	0.14978150467806	1.00517898999436	0.099146422558394			SFTA2	Acute lymphocytic leukaemia	MR Egger	9.29114225230893e-05	2.17122910621796e-08	0.397587357803109	0.161500316682326
AL513477.1	Acute Lymphoblastic Leukemia	Weighted median	0.566793442646854	0.3492072132732	0.919954669940166	0.0215828127534728			SFTA2	Acute lymphocytic leukaemia	Weighted median	2.57947433673314	0.693561707674495	9.59350520687573	0.15736685246308
AL513477.1	Acute Lymphoblastic Leukemia	Inverse variance weighted	0.575842634667872	0.393868879028556	0.84189119160439	0.00439774970460759			SFTA2	Acute lymphocytic leukaemia	Inverse variance weighted	3.10071895348594	0.554730149922293	17.3317747914978	0.197448014413594
AL513477.1	Acute Lymphoblastic Leukemia	Simple mode	0.548363149676826	0.247959488710352	1.21270674289358	0.181448444266797			SFTA2	Acute lymphocytic leukaemia	Simple mode	1.21790124064169	0.100825704968178	14.7113618736879	0.886606942864821
AL513477.1	Acute Lymphoblastic Leukemia	Weighted mode	0.566817546145613	0.332954977849633	0.964941664766549	0.0748071203841236			SFTA2	Acute lymphocytic leukaemia	Weighted mode	1.52713825935908	0.336249536213606	6.93577540495631	0.621605801786067
ALDH1A1	Acute Lymphoblastic Leukemia	MR Egger	0.913570241398523	0.549701165939663	1.51829873699152	0.729406557752872			POMK	Acute lymphocytic leukaemia	MR Egger	0.886744273463492	0.062128112456409	12.6563543528222	0.933641936511594
ALDH1A1	Acute Lymphoblastic Leukemia	Weighted median	0.783518644966575	0.498949124642053	1.23038890478197	0.289352054686413			POMK	Acute lymphocytic leukaemia	Weighted median	1.12690273356416	0.425258804937689	2.9862045327914	0.810107788390844
ALDH1A1	Acute Lymphoblastic Leukemia	Inverse variance weighted	0.688862056279218	0.507670584753655	0.93472213445555	0.0166878951688909			POMK	Acute lymphocytic leukaemia	Inverse variance weighted	1.11592509176674	0.459165388484926	2.71207029463524	0.808712784211801
ALDH1A1	Acute Lymphoblastic Leukemia	Simple mode	0.678260692893831	0.319257794061083	1.44095955081617	0.319521103181688			POMK	Acute lymphocytic leukaemia	Simple mode	1.32843207422235	0.212141255833816	8.31866375489506	0.773783830416551
ALDH1A1	Acute Lymphoblastic Leukemia	Weighted mode	0.708638454266996	0.454931056744237	1.10383419953727	0.136715501749209			POMK	Acute lymphocytic leukaemia	Weighted mode	1.10295450263263	0.359921098083899	3.37993143873444	0.870549607077433
ALG1L	Acute Lymphoblastic Leukemia	MR Egger	0.854275171037426	0.623385971295883	1.17068092875744	0.339525910392313			NDUFS4	Acute lymphocytic leukaemia	MR Egger	1.06437494300714	0.664569839577114	1.70470272924566	0.797813668016255
ALG1L	Acute Lymphoblastic Leukemia	Weighted median	0.756000259351755	0.616657007847655	0.926830287933934	0.00712334751784046			NDUFS4	Acute lymphocytic leukaemia	Weighted median	1.03509618097714	0.680933320374995	1.57346405560447	0.871746416575128
ALG1L	Acute Lymphoblastic Leukemia	Inverse variance weighted	0.78979294391329	0.67854283303747	0.919283004527404	0.00231521743073845			NDUFS4	Acute lymphocytic leukaemia	Inverse variance weighted	1.11183561016559	0.789959835233274	1.56486	0.543228983755298
ALG1L	Acute Lymphoblastic Leukemia	Simple mode	0.711561615733912	0.520480630313482	0.972793036853076	0.0455126217368619			NDUFS4	Acute lymphocytic leukaemia	Simple mode	1.25492493370519	0.735941099543744	2.13989487774404	0.413689658091759
ALG1L	Acute Lymphoblastic Leukemia	Weighted mode	0.756975235286585	0.614501441958274	0.932481956447695	0.0165049827755578			NDUFS4	Acute lymphocytic leukaemia	Weighted mode	1.13918473673934	0.745680891039412	1.74034480434513	0.553151328643457
ALG1L10P	Acute Lymphoblastic Leukemia	MR Egger	0.883823249555514	0.482758125325456	1.61808470013478	0.709417492284953			CLGN	Acute lymphocytic leukaemia	MR Egger	1.11954195785414	0.51133927324534	2.45115965265301	0.783374500614777
ALG1L10P	Acute Lymphoblastic Leukemia	Weighted median	0.674018431691695	0.483185512196484	0.940220339378459	0.020180863620803			CLGN	Acute lymphocytic leukaemia	Weighted median	1.21403018585084	0.692183939318035	2.12930293298794	0.498675383366172
ALG1L10P	Acute Lymphoblastic Leukemia	Inverse variance weighted	0.668486389503246	0.509128746854894	0.877723082249073	0.00374673297905224			CLGN	Acute lymphocytic leukaemia	Inverse variance weighted	1.41164146385014	0.885969019522386	2.24921140418117	0.146898243332557
ALG1L10P	Acute Lymphoblastic Leukemia	Simple mode	0.713389913613463	0.451568086169345	1.12701757372325	0.207411074797231			CLGN	Acute lymphocytic leukaemia	Simple mode	1.43523146575387	0.509126957764752	4.04592475191971	0.508531667898161
ALG1L10P	Acute Lymphoblastic Leukemia	Weighted mode	0.698832045622005	0.484337049028059	1.00831895674358	0.113551491698832			CLGN	Acute lymphocytic leukaemia	Weighted mode	1.26519174235444	0.731050645573489	2.18960225890527	0.41849633215234
ALG1L6P	Acute Lymphoblastic Leukemia	MR Egger	0.861969754509917	0.506017385632849	1.46831290541661	0.608171962766621			HTN3	Acute lymphocytic leukaemia	MR Egger	0.620842384803436	0.210919250241839	1.82745418602839	0.401405225692985
ALG1L6P	Acute Lymphoblastic Leukemia	Weighted median	0.85448474103541	0.610419218534281	1.19613562367114	0.35947364985172			HTN3	Acute lymphocytic leukaemia	Weighted median	1.10136049982108	0.521853848249047	2.32439591015004	0.799997793608421
ALG1L6P	Acute Lymphoblastic Leukemia	Inverse variance weighted	0.735128657316977	0.549508057379195	0.983450807593422	0.0382291361050399			HTN3	Acute lymphocytic leukaemia	Inverse variance weighted	0.896118174669378	0.513110228443398	1.56502002583127	0.699825904130579
ALG1L6P	Acute Lymphoblastic Leukemia	Simple mode	0.819292912699593	0.473053573530258	1.41895318915046	0.503615276209885			HTN3	Acute lymphocytic leukaemia	Simple mode	0.596106353623302	0.169890488679751	2.09159905060901	0.431841041832373
ALG1L6P	Acute Lymphoblastic Leukemia	Weighted mode	0.85330265783872	0.605581685136848	1.2023570787318	0.399503954095177			HTN3	Acute lymphocytic leukaemia	Weighted mode	1.01815480650519	0.437135102838284	2.37143895166232	0.96728163111572
ALG8	Acute Lymphoblastic Leukemia	MR Egger	0.930314934543271	0.103289086437253	8.37925774433126	0.95173342126446			APMAP	Acute lymphocytic leukaemia	MR Egger	1.72001571591539	0.0122131335964669	242.235462310161	0.849803375488518
ALG8	Acute Lymphoblastic Leukemia	Weighted median	0.340041305802786	0.106609446548201	1.08459515920839	0.0683373090749542			APMAP	Acute lymphocytic leukaemia	Weighted median	1.37575004214947	0.260148704889505	7.2754088061986	0.707358932782826
ALG8	Acute Lymphoblastic Leukemia	Inverse variance weighted	0.317362548193246	0.117602125143517	0.856438494396231	0.0234533013111222			APMAP	Acute lymphocytic leukaemia	Inverse variance weighted	1.98828365865609	0.480383276039042	8.2294120225733	0.342959982115889
ALG8	Acute Lymphoblastic Leukemia	Simple mode	0.307880008649324	0.0532069300899776	1.78153672022816	0.245506543001797			APMAP	Acute lymphocytic leukaemia	Simple mode	1.10183072534876	0.118303448965195	10.2620080643611	0.937487699121627
ALG8	Acute Lymphoblastic Leukemia	Weighted mode	0.366432467890117	0.0974232407627913	1.37824150041336	0.19758387291411			APMAP	Acute lymphocytic leukaemia	Weighted mode	1.11809399090769	0.119923835730185	10.4244011617218	0.928113481812657
ALKBH8	Acute Lymphoblastic Leukemia	MR Egger	0.493391182448136	0.0912649787134365	2.66734143095494	0.433116591946891			TOR1AIP1	Acute lymphocytic leukaemia	MR Egger	2.33344996280033	0.120554035060054	45.1663747810719	0.674764651762991
ALKBH8	Acute Lymphoblastic Leukemia	Weighted median	0.457094772413985	0.198816140147762	1.05089873897014	0.0653118162108025			TOR1AIP1	Acute lymphocytic leukaemia	Weighted median	6.01680628543388	0.947041319457038	38.2263763287457	0.057129337261009
ALKBH8	Acute Lymphoblastic Leukemia	Inverse variance weighted	0.484859401398009	0.254085593899465	0.925234034390212	0.0281131650439638			TOR1AIP1	Acute lymphocytic leukaemia	Inverse variance weighted	5.26536639807313	1.01922233053942	27.2012126061689	0.0473980693394594
ALKBH8	Acute Lymphoblastic Leukemia	Simple mode	0.967573518173299	0.247992953400574	3.77510126893827	0.963082468753697			TOR1AIP1	Acute lymphocytic leukaemia	Simple mode	11.0766883901161	0.903756566696936	135.758931346029	0.200729397614924
ALKBH8	Acute Lymphoblastic Leukemia	Weighted mode	0.484531087213453	0.196004024424967	1.19778343921772	0.14768218546474			TOR1AIP1	Acute lymphocytic leukaemia	Weighted mode	8.1726462162229	0.897744525881962	74.3999481477479	0.203295588721859
AMACR	Acute Lymphoblastic Leukemia	MR Egger	0.406377357849799	0.193771556141464	0.852253861513195	0.0291036775775816			HTN1	Acute lymphocytic leukaemia	MR Egger	16.3497156175451	0.594951292308734	449.302664319421	0.240174937054776
AMACR	Acute Lymphoblastic Leukemia	Weighted median	0.567606115556679	0.323200791998896	0.996831413762263	0.0487186773305992			HTN1	Acute lymphocytic leukaemia	Weighted median	1.83967973182295	0.249448196273756	13.5676327439383	0.549860564691667
AMACR	Acute Lymphoblastic Leukemia	Inverse variance weighted	0.557274454059707	0.345117754262274	0.899851755848922	0.0167733236486224			HTN1	Acute lymphocytic leukaemia	Inverse variance weighted	1.44328480050262	0.288871014083623	7.21107661829612	0.654839606074665
AMACR	Acute Lymphoblastic Leukemia	Simple mode	0.450210464951578	0.156280394344017	1.2969602719695	0.15660755263557			HTN1	Acute lymphocytic leukaemia	Simple mode	0.344982969122452	0.012367379583325	9.62315809769511	0.575300726482268
AMACR	Acute Lymphoblastic Leukemia	Weighted mode	0.527915690211184	0.315363899801828	0.883725043184335	0.0257728838215699			HTN1	Acute lymphocytic leukaemia	Weighted mode	3.08182540434418	0.283014270383714	33.5589007931797	0.423689616751947
AMIGO2	Acute Lymphoblastic Leukemia	MR Egger	5.30458793537159	0.857855613568108	32.8011529201887	0.0959167437598398			PLOD3	Acute lymphocytic leukaemia	MR Egger	2.70724179521777	0.651066024949113	11.2571657203995	0.203959209669208
AMIGO2	Acute Lymphoblastic Leukemia	Weighted median	3.60796	1.45027571842359	8.97580350573191	0.0057893499614353			PLOD3	Acute lymphocytic leukaemia	Weighted median	1.86914802561662	0.536713675179118	6.50945653751145	0.32585005949769
AMIGO2	Acute Lymphoblastic Leukemia	Inverse variance weighted	3.97208667922708	2.04699524712386	7.70762541313244	4.54160782330153e-05			PLOD3	Acute lymphocytic leukaemia	Inverse variance weighted	2.41175635422238	0.93888576411539	6.19518256048152	0.0674016533229523
AMIGO2	Acute Lymphoblastic Leukemia	Simple mode	4.38603386942652	0.987100617614209	19.4886851051238	0.0724109280757929			PLOD3	Acute lymphocytic leukaemia	Simple mode	1.89749622193797	0.300946069262105	11.9639107468557	0.510843644343441
AMIGO2	Acute Lymphoblastic Leukemia	Weighted mode	3.51922404774305	1.22980846118367	10.0706234256127	0.0342475613192509			PLOD3	Acute lymphocytic leukaemia	Weighted mode	2.44522586702596	0.589932991939793	10.1352689584499	0.245943624491954
ANGPTL6	Acute Lymphoblastic Leukemia	MR Egger	2.67039357538868	0.838719149214343	8.50225233817185	0.140397630946427			MPZ	Acute lymphocytic leukaemia	MR Egger	1.27019331686475	0.459045387240517	3.5146656671719	0.650612604906557
ANGPTL6	Acute Lymphoblastic Leukemia	Weighted median	2.24007793976092	1.09614308159553	4.57782315142607	0.0269844690361941			MPZ	Acute lymphocytic leukaemia	Weighted median	1.37629199601126	0.723835713118691	2.61686405347901	0.329953351596894
ANGPTL6	Acute Lymphoblastic Leukemia	Inverse variance weighted	2.42951515046554	1.3692986356874	4.31063298575366	0.00241053811625738			MPZ	Acute lymphocytic leukaemia	Inverse variance weighted	1.12689175399905	0.631460550449028	2.01102828090851	0.68601224146346
ANGPTL6	Acute Lymphoblastic Leukemia	Simple mode	2.83919898244749	0.939538613115788	8.5797973062523	0.101559812234851			MPZ	Acute lymphocytic leukaemia	Simple mode	1.23179466068201	0.381853106477622	3.97356486131829	0.73101571464271
ANGPTL6	Acute Lymphoblastic Leukemia	Weighted mode	2.2328843793503	0.990027049208877	5.03599639578602	0.0889147777685355			MPZ	Acute lymphocytic leukaemia	Weighted mode	1.07736277164569	0.575056486252095	2.01842874478812	0.818529124587129
ANK1	Acute Lymphoblastic Leukemia	MR Egger	0.565334826271258	0.0755062546600904	4.23280782809218	0.592244844369062			MSMB	Acute lymphocytic leukaemia	MR Egger	0.963120841989032	0.577149273027032	1.60721289902797	0.887236456361444
ANK1	Acute Lymphoblastic Leukemia	Weighted median	0.431952762465707	0.162095572255697	1.15106900457114	0.0932192624381793			MSMB	Acute lymphocytic leukaemia	Weighted median	0.809070796482737	0.527561448206589	1.24079489876765	0.331498334842436
ANK1	Acute Lymphoblastic Leukemia	Inverse variance weighted	0.258394133066375	0.124939721009567	0.534397927765591	0.000262074455829686			MSMB	Acute lymphocytic leukaemia	Inverse variance weighted	0.83296389536092	0.564960530092791	1.22810145845212	0.356169667689904
ANK1	Acute Lymphoblastic Leukemia	Simple mode	0.537733613372606	0.0982501931705921	2.94307247262806	0.490763084794224			MSMB	Acute lymphocytic leukaemia	Simple mode	0.947452921205917	0.425517918899351	2.1095869246201	0.896240643508661
ANK1	Acute Lymphoblastic Leukemia	Weighted mode	0.476691073517779	0.164436222090628	1.38189978267862	0.202372906627996			MSMB	Acute lymphocytic leukaemia	Weighted mode	0.875118349239621	0.591705282483256	1.29427968255049	0.512112445123455
ANKMY2	Acute Lymphoblastic Leukemia	MR Egger	0.787318088067005	0.13580657196953	4.56435769497634	0.796453363183248			PRR16	Acute lymphocytic leukaemia	MR Egger	0.996203671347312	0.0178170552870014	55.700660901574	0.998689930713107
ANKMY2	Acute Lymphoblastic Leukemia	Weighted median	0.381051380479804	0.131558194310792	1.10369525308735	0.0753771307916941			PRR16	Acute lymphocytic leukaemia	Weighted median	1.62086931848304	0.32354596323239	8.12007456792973	0.556900068753433
ANKMY2	Acute Lymphoblastic Leukemia	Inverse variance weighted	0.358285781374523	0.154337765206247	0.831738757935288	0.0169049052511433			PRR16	Acute lymphocytic leukaemia	Inverse variance weighted	1.69314588696554	0.403607547445427	7.1027982818779	0.471651844235009
ANKMY2	Acute Lymphoblastic Leukemia	Simple mode	0.379632344734288	0.0776883952797061	1.85511255123197	0.262041488838206			PRR16	Acute lymphocytic leukaemia	Simple mode	1.54145253520056	0.175661075367087	13.5264794053597	0.722242884144374
ANKMY2	Acute Lymphoblastic Leukemia	Weighted mode	0.39960938484866	0.11853164806469	1.34721538986764	0.173179152543573			PRR16	Acute lymphocytic leukaemia	Weighted mode	1.52004787147307	0.225816863982311	10.2319441109182	0.695931188912528
ANKRA2	Acute Lymphoblastic Leukemia	MR Egger	0.470735686938252	0.214815802384232	1.03154462799192	0.0730741871811771			APLP2	Acute lymphocytic leukaemia	MR Egger	1.05915805512706	0.0343466652660725	32.6615634167159	0.975061673978127
ANKRA2	Acute Lymphoblastic Leukemia	Weighted median	0.471956678281369	0.272583677060513	0.817154968985671	0.00734068643484758			APLP2	Acute lymphocytic leukaemia	Weighted median	0.846129763693525	0.230044286868981	3.1121641261007	0.801470318315205
ANKRA2	Acute Lymphoblastic Leukemia	Inverse variance weighted	0.465494045303555	0.299979948435904	0.722330633573552	0.000647315701026983			APLP2	Acute lymphocytic leukaemia	Inverse variance weighted	1.01648229876487	0.202852213737461	5.09354196666327	0.984137690368879
ANKRA2	Acute Lymphoblastic Leukemia	Simple mode	0.557505006913693	0.208519523595994	1.49056465971999	0.256165849341063			APLP2	Acute lymphocytic leukaemia	Simple mode	0.414824409038361	0.0657994111443207	2.61521018716408	0.385089568321548
ANKRA2	Acute Lymphoblastic Leukemia	Weighted mode	0.455464120738113	0.261840280097491	0.792267580841662	0.0105397299867723			APLP2	Acute lymphocytic leukaemia	Weighted mode	0.748409185394119	0.177728443743279	3.15152879857179	0.706439536367091
ANKRD10-IT1	Acute Lymphoblastic Leukemia	MR Egger	0.770522292055429	0.236331493814966	2.51216878872347	0.694691281625944			HTATIP2	Acute lymphocytic leukaemia	MR Egger	0.696738782208838	0.234322542611736	2.07169538714941	0.536475627152723
ANKRD10-IT1	Acute Lymphoblastic Leukemia	Weighted median	0.691830333032379	0.419650791852838	1.14054165748253	0.148620200093102			HTATIP2	Acute lymphocytic leukaemia	Weighted median	0.683171271096847	0.360218071923587	1.29566788018089	0.243300615200734
ANKRD10-IT1	Acute Lymphoblastic Leukemia	Inverse variance weighted	0.60178710537702	0.388088130361448	0.933158455170387	0.0232622435788811			HTATIP2	Acute lymphocytic leukaemia	Inverse variance weighted	0.555282473271639	0.320204394398626	0.962943140433028	0.0362208305243084
ANKRD10-IT1	Acute Lymphoblastic Leukemia	Simple mode	0.696819678241452	0.322190754426937	1.5070502716571	0.410636562070495			HTATIP2	Acute lymphocytic leukaemia	Simple mode	0.936411972482508	0.261224	3.35676522075942	0.922140036642211
ANKRD10-IT1	Acute Lymphoblastic Leukemia	Weighted mode	0.692043817177922	0.392953078898775	1.21878328638204	0.271394564815755			HTATIP2	Acute lymphocytic leukaemia	Weighted mode	0.760783938210947	0.372308929777521	1.55460198331967	0.474805760516582
ANKRD10	Acute Lymphoblastic Leukemia	MR Egger	0.557146897344905	0.299582992423809	1.03614915756608	0.073890380192914			OLFM3	Acute lymphocytic leukaemia	MR Egger	5.33642482074019	0.0726789237963002	391.825145171751	0.487472681765705
ANKRD10	Acute Lymphoblastic Leukemia	Weighted median	0.693611577923825	0.434819226896255	1.10642996277799	0.124659938208128			OLFM3	Acute lymphocytic leukaemia	Weighted median	1.01336820110865	0.277087265688212	3.7061072022476	0.983985521807155
ANKRD10	Acute Lymphoblastic Leukemia	Inverse variance weighted	0.726568269626565	0.538773077476022	0.979821510200895	0.0362947793074548			OLFM3	Acute lymphocytic leukaemia	Inverse variance weighted	1.14799415365149	0.237452294063703	5.55012779309872	0.863700284456639
ANKRD10	Acute Lymphoblastic Leukemia	Simple mode	0.742465776890114	0.347966704589366	1.58421889963172	0.446710888383392			OLFM3	Acute lymphocytic leukaemia	Simple mode	0.305964423267002	0.0262136182325717	3.57120590811036	0.388209630302637
ANKRD10	Acute Lymphoblastic Leukemia	Weighted mode	0.698130077088295	0.44567761662995	1.09358331302509	0.126113666470593			OLFM3	Acute lymphocytic leukaemia	Weighted mode	0.912893914440015	0.204309802868787	4.07897852829327	0.909664783423441
ANKRD18A	Acute Lymphoblastic Leukemia	MR Egger	43.1668573044349	0.508743788232128	3662.70333445572	0.195152809137082			ASCC1	Acute lymphocytic leukaemia	MR Egger	1.04313	0.0361649269510967	30.0877122651217	0.981905771157336
ANKRD18A	Acute Lymphoblastic Leukemia	Weighted median	3.20823158169007	0.960058135637781	10.7209652204196	0.0582541322770714			ASCC1	Acute lymphocytic leukaemia	Weighted median	0.829184729285226	0.103148345545473	6.66561651225623	0.860180948875175
ANKRD18A	Acute Lymphoblastic Leukemia	Inverse variance weighted	3.97533019530126	1.52788792642255	10.3431998436405	0.00467149470320069			ASCC1	Acute lymphocytic leukaemia	Inverse variance weighted	2.77240592853972	0.527963908009486	14.5582577066311	0.228152386762179
ANKRD18A	Acute Lymphoblastic Leukemia	Simple mode	2.47523056520606	0.462267111710788	13.2537361964946	0.34943976883851			ASCC1	Acute lymphocytic leukaemia	Simple mode	0.80054090217039	0.0324650675951738	19.7401633053446	0.898358785611092
ANKRD18A	Acute Lymphoblastic Leukemia	Weighted mode	2.35101147431302	0.496230896754079	11.1384740218839	0.342060838516302			ASCC1	Acute lymphocytic leukaemia	Weighted mode	0.779972920470196	0.0467512809244207	13.0126436032906	0.87101136608426
ANKRD26	Acute Lymphoblastic Leukemia	MR Egger	0.470288756127021	0.211254105193644	1.04694540225273	0.084470206743801			GNPTG	Acute lymphocytic leukaemia	MR Egger	2.7193698350901	1.19173876393651	6.20519573901509	0.0388275036179585
ANKRD26	Acute Lymphoblastic Leukemia	Weighted median	0.514908498293982	0.273289457697389	0.970146319763788	0.0399971805873792			GNPTG	Acute lymphocytic leukaemia	Weighted median	2.34770548349752	1.19437449487829	4.6147343742517	0.0133183655509634
ANKRD26	Acute Lymphoblastic Leukemia	Inverse variance weighted	0.535269699691836	0.310998518329006	0.921270149284394	0.0240705152396091			GNPTG	Acute lymphocytic leukaemia	Inverse variance weighted	1.94420859719012	1.05198773099262	3.59314748454465	0.0338596850098482
ANKRD26	Acute Lymphoblastic Leukemia	Simple mode	0.536439804477222	0.155861945683113	1.84629841855451	0.338036800164622			GNPTG	Acute lymphocytic leukaemia	Simple mode	2.81208122197154	0.443489960507246	17.8308451219963	0.296001141027893
ANKRD26	Acute Lymphoblastic Leukemia	Weighted mode	0.50970821859093	0.273302860168747	0.950602814543279	0.0500570059201604			GNPTG	Acute lymphocytic leukaemia	Weighted mode	2.41274523047924	1.19080265116614	4.88858463784873	0.0325498977846544
ANKRD34B	Acute Lymphoblastic Leukemia	MR Egger	0.676850177023168	0.469062746080417	0.976684177041321	0.040669055434623			SFTPB	Acute lymphocytic leukaemia	MR Egger	1.5046969449892	0.646687517124005	3.50109262403728	0.379581055894477
ANKRD34B	Acute Lymphoblastic Leukemia	Weighted median	0.87297045253487	0.639562956285975	1.19155964789521	0.392073972762224			SFTPB	Acute lymphocytic leukaemia	Weighted median	1.14515730476236	0.695991339760371	1.88419765841065	0.593686616385519
ANKRD34B	Acute Lymphoblastic Leukemia	Inverse variance weighted	0.794758874057683	0.640018041902345	0.98691228455996	0.0375949793762265			SFTPB	Acute lymphocytic leukaemia	Inverse variance weighted	1.06123007925067	0.668932945490202	1.68359069275782	0.800735933678253
ANKRD34B	Acute Lymphoblastic Leukemia	Simple mode	0.626731051164944	0.360903170021149	1.08835788411417	0.101527573008349			SFTPB	Acute lymphocytic leukaemia	Simple mode	0.661215788331939	0.152439887151978	2.86805721853851	0.597746389938268
ANKRD34B	Acute Lymphoblastic Leukemia	Weighted mode	0.755248594444363	0.547173708758723	1.04244855021297	0.0922225607528174			SFTPB	Acute lymphocytic leukaemia	Weighted mode	1.11859285579655	0.686692365921586	1.82214050881406	0.666193048462669
ANKRD36	Acute Lymphoblastic Leukemia	MR Egger	1.66888833229931	0.872076158234796	3.19374430705959	0.142783832050355			TMX2	Acute lymphocytic leukaemia	MR Egger	0.980345042755696	0.0698577533498927	13.7576196881394	0.988953317507093
ANKRD36	Acute Lymphoblastic Leukemia	Weighted median	2.11894071871082	1.21451413034766	3.69687734149741	0.0081837434262876			TMX2	Acute lymphocytic leukaemia	Weighted median	1.07049010220575	0.470576262031883	2.4352037095378	0.870962419840604
ANKRD36	Acute Lymphoblastic Leukemia	Inverse variance weighted	2.2085300691662	1.47132471086527	3.3151112262247	0.000131579580191065			TMX2	Acute lymphocytic leukaemia	Inverse variance weighted	1.13418450993335	0.489402974061772	2.6284566517783	0.769040436495935
ANKRD36	Acute Lymphoblastic Leukemia	Simple mode	2.66322739357934	1.04209665379611	6.80625940412924	0.0575425811390504			TMX2	Acute lymphocytic leukaemia	Simple mode	0.769697907015928	0.1766744872846	3.3532564727943	0.741581986370544
ANKRD36	Acute Lymphoblastic Leukemia	Weighted mode	1.94712415315969	1.13445190141212	3.34195963980368	0.0279171133983077			TMX2	Acute lymphocytic leukaemia	Weighted mode	1.01790092948073	0.411687414013748	2.51676943955135	0.970842635250231
ANKRD9	Acute Lymphoblastic Leukemia	MR Egger	1.82716112956002	0.823385656163833	4.05462223975246	0.155595005173613			NDUFB4	Acute lymphocytic leukaemia	MR Egger	1.13906462485234	0.409308242813743	3.16990493685322	0.807308298469096
ANKRD9	Acute Lymphoblastic Leukemia	Weighted median	1.4339200415484	0.837037613651006	2.45643284366363	0.189419754690665			NDUFB4	Acute lymphocytic leukaemia	Weighted median	0.831316224350216	0.498920318189325	1.38516	0.478190219729426
ANKRD9	Acute Lymphoblastic Leukemia	Inverse variance weighted	1.83148261588511	1.22449924439236	2.73934719653822	0.00321899051247553			NDUFB4	Acute lymphocytic leukaemia	Inverse variance weighted	0.858571903945022	0.511212564238974	1.44195539352822	0.56432454660165
ANKRD9	Acute Lymphoblastic Leukemia	Simple mode	4.03756403267274	1.45271642963756	11.2216830383062	0.0149412516902466			NDUFB4	Acute lymphocytic leukaemia	Simple mode	0.591581128437818	0.228274916664661	1.53309981068954	0.299552925583837
ANKRD9	Acute Lymphoblastic Leukemia	Weighted mode	1.72524139902278	0.943918039697764	3.15330119748014	0.0923589383003133			NDUFB4	Acute lymphocytic leukaemia	Weighted mode	0.866005879376711	0.529583656406695	1.41614299089905	0.576193771351192
ANKZF1	Acute Lymphoblastic Leukemia	MR Egger	2.18706025033698	0.0560561679636612	85.3292815467658	0.716163603489441			KLRG2	Acute lymphocytic leukaemia	MR Egger	0.533991204639385	0.157902855160261	1.80583565979738	0.387199332322847
ANKZF1	Acute Lymphoblastic Leukemia	Weighted median	0.273795198724883	0.065104112614793	1.15144509054816	0.0771316242030007			KLRG2	Acute lymphocytic leukaemia	Weighted median	1.08483590738489	0.517712589605997	2.27320905378647	0.829186531637436
ANKZF1	Acute Lymphoblastic Leukemia	Inverse variance weighted	0.178706273603598	0.0514280268734489	0.620983035259547	0.00673361909548942			KLRG2	Acute lymphocytic leukaemia	Inverse variance weighted	1.08929023516969	0.547074300776207	2.16890688294537	0.807692450228466
ANKZF1	Acute Lymphoblastic Leukemia	Simple mode	0.228120870638578	0.0286263969716783	1.81787221327182	0.257192021248208			KLRG2	Acute lymphocytic leukaemia	Simple mode	4.45350837577431	0.549064121239976	36.1228062185169	0.234482830254979
ANKZF1	Acute Lymphoblastic Leukemia	Weighted mode	0.278470592519053	0.0575628052112254	1.34715239490778	0.210165111596088			KLRG2	Acute lymphocytic leukaemia	Weighted mode	0.865170787691403	0.409327340371464	1.82865989649087	0.72374966772708
ANO9	Acute Lymphoblastic Leukemia	MR Egger	1.97383067283878	1.04954510569338	3.71209155652755	0.0459391375644732			IGSF11	Acute lymphocytic leukaemia	MR Egger	10514.2326434027	0.00117333657708667	94217712324.3544	0.46012876624643
ANO9	Acute Lymphoblastic Leukemia	Weighted median	1.47086562143041	0.898186788049909	2.40868125103801	0.125201377995945			IGSF11	Acute lymphocytic leukaemia	Weighted median	2.8885599364527	0.187937818993262	44.3964847052885	0.446716577896081
ANO9	Acute Lymphoblastic Leukemia	Inverse variance weighted	1.47279484175522	1.05236616296336	2.06118813226827	0.0239685553374689			IGSF11	Acute lymphocytic leukaemia	Inverse variance weighted	0.857734164449656	0.0198953049440817	36.9789706130139	0.936305120906536
ANO9	Acute Lymphoblastic Leukemia	Simple mode	1.13795480821456	0.495056998214174	2.61574152109736	0.763501897469232			IGSF11	Acute lymphocytic leukaemia	Simple mode	4.80359595673974	0.174975651750837	131.872828503387	0.451128723847781
ANO9	Acute Lymphoblastic Leukemia	Weighted mode	1.45916480112312	0.851607598673912	2.50016782395099	0.181727756509318			IGSF11	Acute lymphocytic leukaemia	Weighted mode	5.09421615293733	0.147551565118165	175.877756308888	0.462676953428831
ANXA3	Acute Lymphoblastic Leukemia	MR Egger	1.95691372845963	1.04961231933772	3.64850075602208	0.0507287825780381			COL28A1	Acute lymphocytic leukaemia	MR Egger	0.0882622045489258	0.00012526052137849	62.1921150104215	0.520601845552673
ANXA3	Acute Lymphoblastic Leukemia	Weighted median	1.6926925119733	1.04332608054915	2.74622478389728	0.0330240042639296			COL28A1	Acute lymphocytic leukaemia	Weighted median	1.77552137408864	0.128468357097873	24.5389309948436	0.668311524688686
ANXA3	Acute Lymphoblastic Leukemia	Inverse variance weighted	1.73895537503839	1.1888491087499	2.54360774140184	0.00435078950611751			COL28A1	Acute lymphocytic leukaemia	Inverse variance weighted	1.52222843384562	0.174295609945454	13.294536824727	0.703939908791184
ANXA3	Acute Lymphoblastic Leukemia	Simple mode	0.871301767602896	0.310367891676775	2.44602225483604	0.79677903684798			COL28A1	Acute lymphocytic leukaemia	Simple mode	2.08126909053562	0.0531635447107797	81.4784087626993	0.71522756844128
ANXA3	Acute Lymphoblastic Leukemia	Weighted mode	1.69409288233951	1.03891533674515	2.76244905863527	0.0496892246381693			COL28A1	Acute lymphocytic leukaemia	Weighted mode	1.88649442886093	0.0808122923161461	44.0386125442486	0.713073585814178
ANXA5	Acute Lymphoblastic Leukemia	MR Egger	0.911023863963373	0.674553572796679	1.2303907564669	0.545635618751712			SUDS3	Acute lymphocytic leukaemia	MR Egger	2.2566776551088	0.0443755930435122	114.761148861129	0.724048874173554
ANXA5	Acute Lymphoblastic Leukemia	Weighted median	1.10116641768381	0.818316099790725	1.48178	0.524619045491418			SUDS3	Acute lymphocytic leukaemia	Weighted median	1.03532260933297	0.251622339721008	4.25992742371168	0.961637501313236
ANXA5	Acute Lymphoblastic Leukemia	Inverse variance weighted	1.29633471156013	1.0660134281595	1.57641887053625	0.00930832204867968			SUDS3	Acute lymphocytic leukaemia	Inverse variance weighted	0.922410761932761	0.258491913337139	3.29155988961118	0.900969821511306
ANXA5	Acute Lymphoblastic Leukemia	Simple mode	1.2636304055676	0.773672304221178	2.06387354589656	0.353567629408291			SUDS3	Acute lymphocytic leukaemia	Simple mode	1.08830444875299	0.139062598761147	8.51707492688155	0.940826499360823
ANXA5	Acute Lymphoblastic Leukemia	Weighted mode	1.10949604957923	0.858422331800114	1.43400449688971	0.430401898306301			SUDS3	Acute lymphocytic leukaemia	Weighted mode	1.0505327224036	0.239270711305181	4.61242830273983	0.952035954741596
ANXA9	Acute Lymphoblastic Leukemia	MR Egger	0.565089947797168	0.0264415927566737	12.0766797991324	0.777004109228909			GNRH2	Acute lymphocytic leukaemia	MR Egger	0.843734875903425	0.134196584691969	5.30481861702977	0.872950548816019
ANXA9	Acute Lymphoblastic Leukemia	Weighted median	0.285263668973384	0.0530696866349539	1.53336802977387	0.143789157105114			GNRH2	Acute lymphocytic leukaemia	Weighted median	0.962645707587105	0.33300245058445	2.78282	0.943961680018817
ANXA9	Acute Lymphoblastic Leukemia	Inverse variance weighted	0.223430122217995	0.0514322125619131	0.970617770998175	0.0455224110480041			GNRH2	Acute lymphocytic leukaemia	Inverse variance weighted	1.00490019626214	0.369321624395972	2.73426828472137	0.992363091753697
ANXA9	Acute Lymphoblastic Leukemia	Simple mode	0.332197412739789	0.0414321866136938	2.66351187447433	0.408442183403486			GNRH2	Acute lymphocytic leukaemia	Simple mode	0.953006780951048	0.194755765588859	4.66338915201098	0.956359081786236
ANXA9	Acute Lymphoblastic Leukemia	Weighted mode	0.32936832170051	0.0386355058208713	2.80787035228116	0.416639217636442			GNRH2	Acute lymphocytic leukaemia	Weighted mode	0.950784683547185	0.288906341048437	3.1290123684629	0.939049848949105
AP001007.1	Acute Lymphoblastic Leukemia	MR Egger	1.13602518000758	0.771306721721794	1.67320363386741	0.522066307494474			ACE	Acute lymphocytic leukaemia	MR Egger	0.823292039626027	0.391805093225825	1.72996674681029	0.614791375455997
AP001007.1	Acute Lymphoblastic Leukemia	Weighted median	1.23376447689128	0.895817149843765	1.6992025489848	0.198330970540164			ACE	Acute lymphocytic leukaemia	Weighted median	1.05830131532489	0.658348740253294	1.70122855188798	0.815005992629784
AP001007.1	Acute Lymphoblastic Leukemia	Inverse variance weighted	1.32158826695497	1.05965361830406	1.64827026226589	0.0133562463770469			ACE	Acute lymphocytic leukaemia	Inverse variance weighted	1.03709035739589	0.708421266387386	1.51824410197107	0.851436340187033
AP001007.1	Acute Lymphoblastic Leukemia	Simple mode	1.55635499877938	0.908051691411715	2.66751431128308	0.11490652600541			ACE	Acute lymphocytic leukaemia	Simple mode	1.51985999024387	0.68303217257799	3.38194082604555	0.319347688114785
AP001007.1	Acute Lymphoblastic Leukemia	Weighted mode	1.31719900540316	0.986028246371601	1.75959788801142	0.0690486152694273			ACE	Acute lymphocytic leukaemia	Weighted mode	1.03929668697182	0.687368845472836	1.57140901957462	0.857169664728903
AP001189.4	Acute Lymphoblastic Leukemia	MR Egger	0.774740718559423	0.609429557141464	0.98489345316516	0.0444960840512043			PSMD5	Acute lymphocytic leukaemia	MR Egger	0.532167258480932	0.0120586403349288	23.4853999400574	0.775072861469348
AP001189.4	Acute Lymphoblastic Leukemia	Weighted median	0.850664306310712	0.721685775116277	1.00269367497855	0.0538633092892547			PSMD5	Acute lymphocytic leukaemia	Weighted median	0.919520643733651	0.217062354290091	3.89527800441325	0.90930844986167
AP001189.4	Acute Lymphoblastic Leukemia	Inverse variance weighted	0.861390336147203	0.766595362444869	0.967907383161548	0.0121291719614445			PSMD5	Acute lymphocytic leukaemia	Inverse variance weighted	0.907693287072086	0.24119576126417	3.41592695940184	0.886107844445565
AP001189.4	Acute Lymphoblastic Leukemia	Simple mode	0.773882065169092	0.582705329623101	1.02778097323693	0.0850762627338525			PSMD5	Acute lymphocytic leukaemia	Simple mode	1.20481031632144	0.152390972679222	9.52528796682777	0.8710549941096
AP001189.4	Acute Lymphoblastic Leukemia	Weighted mode	0.818835740143876	0.687296348181676	0.97555002454303	0.0315666744285078			PSMD5	Acute lymphocytic leukaemia	Weighted mode	0.764891857151104	0.142978255458711	4.09194776687578	0.774611345594655
AP001469.9	Acute Lymphoblastic Leukemia	MR Egger	1.26878603948715	0.885084484601754	1.81882977501501	0.210623314141929			HS3ST5	Acute lymphocytic leukaemia	MR Egger	0.425422396795259	0.148194602687708	1.22126050755311	0.173040452166801
AP001469.9	Acute Lymphoblastic Leukemia	Weighted median	1.13159460275842	0.879083228704068	1.4566383513876	0.337240378034016			HS3ST5	Acute lymphocytic leukaemia	Weighted median	0.478510631837198	0.233890485633463	0.978972804990725	0.0435716383945876
AP001469.9	Acute Lymphoblastic Leukemia	Inverse variance weighted	1.21718202626403	1.01810941555071	1.45517963239621	0.031008078117335			HS3ST5	Acute lymphocytic leukaemia	Inverse variance weighted	0.51688487879698	0.26689381577998	1.00103472666904	0.0503553146049439
AP001469.9	Acute Lymphoblastic Leukemia	Simple mode	1.22271816816207	0.818307731042386	1.82698960554751	0.338135764237505			HS3ST5	Acute lymphocytic leukaemia	Simple mode	0.53175171444438	0.117737747265187	2.40160774588002	0.443015676868216
AP001469.9	Acute Lymphoblastic Leukemia	Weighted mode	1.12367916811508	0.883479380118325	1.4291843151865	0.353284192172865			HS3ST5	Acute lymphocytic leukaemia	Weighted mode	0.474657816145319	0.221973359668697	1.01498685591871	0.103031820809781
AP001610.5	Acute Lymphoblastic Leukemia	MR Egger	0.799569920745915	0.501437643551492	1.27495824532364	0.371951103048487			GAL3ST2	Acute lymphocytic leukaemia	MR Egger	1.98106384427181	0.301411434762915	13.0207865476904	0.499720230194178
AP001610.5	Acute Lymphoblastic Leukemia	Weighted median	0.836130247303445	0.618320443064653	1.13066581947481	0.245077478001164			GAL3ST2	Acute lymphocytic leukaemia	Weighted median	1.02004088587012	0.518050154807594	2.00846076232356	0.954224535315485
AP001610.5	Acute Lymphoblastic Leukemia	Inverse variance weighted	0.759061009865296	0.587592759711747	0.980566229203325	0.0348388593881666			GAL3ST2	Acute lymphocytic leukaemia	Inverse variance weighted	0.835532607393788	0.371924417896179	1.87703389298074	0.663468597435734
AP001610.5	Acute Lymphoblastic Leukemia	Simple mode	0.851658111644603	0.440447500553275	1.64678318805062	0.643420486197109			GAL3ST2	Acute lymphocytic leukaemia	Simple mode	1.07399142399371	0.278935035008217	4.13521943838307	0.919900265845013
AP001610.5	Acute Lymphoblastic Leukemia	Weighted mode	0.846106314299859	0.607562792353361	1.17830766483429	0.346003463886217			GAL3ST2	Acute lymphocytic leukaemia	Weighted mode	1.07399142399371	0.552551340739438	2.08751204416309	0.83852601057054
AP001625.6	Acute Lymphoblastic Leukemia	MR Egger	1.16673498781898	0.613155246857721	2.22010745040046	0.658267661077521			PCDHB2	Acute lymphocytic leukaemia	MR Egger	0.956525075893463	0.102685298734135	8.91013837513285	0.970126631486025
AP001625.6	Acute Lymphoblastic Leukemia	Weighted median	1.47717769934634	1.0088	2.16301128363597	0.0449579091243479			PCDHB2	Acute lymphocytic leukaemia	Weighted median	1.3292318054179	0.548466416788022	3.22145009877133	0.528603559767592
AP001625.6	Acute Lymphoblastic Leukemia	Inverse variance weighted	1.4690192342349	1.05497627151554	2.04556023563637	0.0227962378855943			PCDHB2	Acute lymphocytic leukaemia	Inverse variance weighted	1.72033307500978	0.720287	4.10884378153329	0.221954048540357
AP001625.6	Acute Lymphoblastic Leukemia	Simple mode	1.94136951533557	0.931970432455938	4.0440291492321	0.126802948311891			PCDHB2	Acute lymphocytic leukaemia	Simple mode	1.99623465094886	0.407418097439375	9.78099109169269	0.42211032948921
AP001625.6	Acute Lymphoblastic Leukemia	Weighted mode	1.49970336726306	1.02364897118289	2.19714985614764	0.0827392434142964			PCDHB2	Acute lymphocytic leukaemia	Weighted mode	1.17337403664747	0.429637044787073	3.20458081206831	0.764196979431923
AP001816.1	Acute Lymphoblastic Leukemia	MR Egger	1.06607426950774	0.851189079590011	1.33520785846299	0.579284500896716			CDYL2	Acute lymphocytic leukaemia	MR Egger	0.281236	0.0481782823167408	1.64168233432534	0.25352288100096
AP001816.1	Acute Lymphoblastic Leukemia	Weighted median	1.14124643113615	0.92761823162789	1.40407268008879	0.211498510626759			CDYL2	Acute lymphocytic leukaemia	Weighted median	0.440940271869068	0.159040207849162	1.22251049583869	0.115521998593712
AP001816.1	Acute Lymphoblastic Leukemia	Inverse variance weighted	1.16180387720155	1.01449297255398	1.33050527268066	0.0301583010301873			CDYL2	Acute lymphocytic leukaemia	Inverse variance weighted	0.476538392664469	0.189232331616746	1.20005306568415	0.115722394320906
AP001816.1	Acute Lymphoblastic Leukemia	Simple mode	1.11300118674252	0.764100042471962	1.62121655913362	0.578714091230935			CDYL2	Acute lymphocytic leukaemia	Simple mode	1.28035168020444	0.178554554064755	9.1809499544202	0.817875821346098
AP001816.1	Acute Lymphoblastic Leukemia	Weighted mode	1.14516385076482	0.947971085016916	1.38337578627213	0.164259927802091			CDYL2	Acute lymphocytic leukaemia	Weighted mode	0.352812874214238	0.119403957821295	1.04248574739549	0.132555146637045
AP002954.4	Acute Lymphoblastic Leukemia	MR Egger	0.805204342356882	0.651577307457755	0.995053120373464	0.0513346899802195			ADAM7	Acute lymphocytic leukaemia	MR Egger	1.44320978551515	0.285464640770773	7.29636595055293	0.734130997013143
AP002954.4	Acute Lymphoblastic Leukemia	Weighted median	0.922545382774023	0.776369802253814	1.09624302852447	0.359679984674913			ADAM7	Acute lymphocytic leukaemia	Weighted median	0.558687692238516	0.261780946486547	1.19234016702908	0.132280511989957
AP002954.4	Acute Lymphoblastic Leukemia	Inverse variance weighted	0.893249847587618	0.801988213691606	0.994896529142911	0.04006755628626			ADAM7	Acute lymphocytic leukaemia	Inverse variance weighted	0.516049157901318	0.246525333156619	1.08024084162366	0.0792221602889469
AP002954.4	Acute Lymphoblastic Leukemia	Simple mode	0.881985340170126	0.680431446771797	1.1432424882266	0.348079048827878			ADAM7	Acute lymphocytic leukaemia	Simple mode	0.36924916492551	0.0759491205485368	1.79521428047416	0.342292519271786
AP002954.4	Acute Lymphoblastic Leukemia	Weighted mode	0.897959389414017	0.755616612053688	1.06711664642373	0.228256406385772			ADAM7	Acute lymphocytic leukaemia	Weighted mode	0.599411790643999	0.281310157288269	1.27721834940664	0.315998702929874
AP1S3	Acute Lymphoblastic Leukemia	MR Egger	3.48047721121422	0.596802172913173	20.2977170117373	0.214984298856255			PROK2	Acute lymphocytic leukaemia	MR Egger	0.873863875467517	0.522282288665229	1.46211749741447	0.616975475547901
AP1S3	Acute Lymphoblastic Leukemia	Weighted median	3.53655576072221	1.35928094282379	9.20135510964696	0.00962009556320555			PROK2	Acute lymphocytic leukaemia	Weighted median	0.840211798518783	0.550479652248726	1.28243771315855	0.419683854518066
AP1S3	Acute Lymphoblastic Leukemia	Inverse variance weighted	4.14413231048133	1.7989988826335	9.54632755615452	0.000839910734750187			PROK2	Acute lymphocytic leukaemia	Inverse variance weighted	0.897235330913326	0.617481973809848	1.30373237306366	0.569502445500714
AP1S3	Acute Lymphoblastic Leukemia	Simple mode	3.55470437025486	0.723963844464805	17.453804159585	0.162226220721827			PROK2	Acute lymphocytic leukaemia	Simple mode	0.968775491512029	0.436417242638582	2.15052445517514	0.939039307145631
AP1S3	Acute Lymphoblastic Leukemia	Weighted mode	3.47792584602707	1.30096397886105	9.29769646739388	0.0419372518240344			PROK2	Acute lymphocytic leukaemia	Weighted mode	0.84206164705552	0.549789248193302	1.28970841058091	0.443519286984296
AP5S1	Acute Lymphoblastic Leukemia	MR Egger	0.0782274444549988	3.52382913592891e-08	173661.458314345	0.790343342865548			KERA	Acute lymphocytic leukaemia	MR Egger	0.4118410783276	0.10840177821085	1.56467058564417	0.262633357236918
AP5S1	Acute Lymphoblastic Leukemia	Weighted median	9.78294501401978	1.70630752371993	56.0895	0.0104757604121586			KERA	Acute lymphocytic leukaemia	Weighted median	0.707845320647538	0.33399706878494	1.50014788987636	0.367232327627322
AP5S1	Acute Lymphoblastic Leukemia	Inverse variance weighted	13.9721021641022	3.00929551700404	64.8722060631868	0.000761529166189206			KERA	Acute lymphocytic leukaemia	Inverse variance weighted	0.761868967093188	0.370118484459183	1.56826623741256	0.460277091469869
AP5S1	Acute Lymphoblastic Leukemia	Simple mode	9.29766509965317	1.01238703705026	85.3888613165019	0.187524279914027			KERA	Acute lymphocytic leukaemia	Simple mode	0.681093518117805	0.107711386474707	4.30677197281294	0.700046426977113
AP5S1	Acute Lymphoblastic Leukemia	Weighted mode	8.97398592295553	0.957606777232785	84.0975912661357	0.194536320376763			KERA	Acute lymphocytic leukaemia	Weighted mode	0.681093518117805	0.33332611796497	1.39169526604825	0.340370940762197
APBB1IP	Acute Lymphoblastic Leukemia	MR Egger	0.466425687658082	0.246278255510374	0.883362283269667	0.028289561720416			GRIA4	Acute lymphocytic leukaemia	MR Egger	1.32931113057487	0.196536126283244	8.9910598895369	0.7802126284283
APBB1IP	Acute Lymphoblastic Leukemia	Weighted median	0.793676139795824	0.462170456794582	1.36296426052429	0.402264621617427			GRIA4	Acute lymphocytic leukaemia	Weighted median	1.77904246521988	0.585923761873934	5.40171315621877	0.309330885727802
APBB1IP	Acute Lymphoblastic Leukemia	Inverse variance weighted	0.653628004701726	0.445744403691875	0.95846311247395	0.0294639214055749			GRIA4	Acute lymphocytic leukaemia	Inverse variance weighted	1.34774433549363	0.574760674454025	3.16029762401648	0.492494903622328
APBB1IP	Acute Lymphoblastic Leukemia	Simple mode	0.603044599318721	0.233938340755033	1.55452410064019	0.305597739613258			GRIA4	Acute lymphocytic leukaemia	Simple mode	1.11275808458128	0.17515492491582	7.06934478374563	0.913004091929346
APBB1IP	Acute Lymphoblastic Leukemia	Weighted mode	0.762020591663977	0.430885779671982	1.34763180758011	0.359437935571533			GRIA4	Acute lymphocytic leukaemia	Weighted mode	2.26098554993179	0.68978284864008	7.41110868018664	0.219996188201656
APCDD1	Acute Lymphoblastic Leukemia	MR Egger	0.832154726456135	0.305246675001528	2.26859633691282	0.723295651422655			TMED2	Acute lymphocytic leukaemia	MR Egger	124.616261142539	0.00190356172790308	8157976.86700292	0.550453737590753
APCDD1	Acute Lymphoblastic Leukemia	Weighted median	0.609583416720014	0.2703661838075	1.37440243712068	0.232747742318925			TMED2	Acute lymphocytic leukaemia	Weighted median	3.33352117663499	0.3223519119691	34.4727703558314	0.312414258980789
APCDD1	Acute Lymphoblastic Leukemia	Inverse variance weighted	0.569591239675732	0.342855487828503	0.946270927060733	0.0297621224293164			TMED2	Acute lymphocytic leukaemia	Inverse variance weighted	2.93291672423841	0.383720104086237	22.4174	0.299767122827885
APCDD1	Acute Lymphoblastic Leukemia	Simple mode	1.18636184357631	0.291951438302679	4.82085113906724	0.813501790936962			TMED2	Acute lymphocytic leukaemia	Simple mode	2.68564951656403	0.106710857419886	67.5911851915874	0.609263063246714
APCDD1	Acute Lymphoblastic Leukemia	Weighted mode	0.780032278979396	0.334688620586448	1.81795949675149	0.571106270670861			TMED2	Acute lymphocytic leukaemia	Weighted mode	5.62310834335527	0.424268330789269	74.5267679590649	0.320516481493962
ARF3	Acute Lymphoblastic Leukemia	MR Egger	0.803010857391058	0.498754145299169	1.2928743413273	0.374294463422464			KLRG2	Acute lymphocytic leukaemia	MR Egger	0.167202302715626	0.033513498595645	0.834189541674434	0.160943326506482
ARF3	Acute Lymphoblastic Leukemia	Weighted median	0.669867987649916	0.435268767069541	1.03091045079845	0.0685158445149503			KLRG2	Acute lymphocytic leukaemia	Weighted median	0.424203211923451	0.15230264572652	1.18151831275008	0.100830493785871
ARF3	Acute Lymphoblastic Leukemia	Inverse variance weighted	0.638347672834333	0.474877853175586	0.858089609123846	0.00293930154698483			KLRG2	Acute lymphocytic leukaemia	Inverse variance weighted	0.427259022408508	0.159925604663545	1.14146995169114	0.0898691307146686
ARF3	Acute Lymphoblastic Leukemia	Simple mode	0.60132647219535	0.285025198256177	1.26863704814586	0.192162186974423			KLRG2	Acute lymphocytic leukaemia	Simple mode	1.03455239608183	0.158568340485991	6.74976263835721	0.973912104801104
ARF3	Acute Lymphoblastic Leukemia	Weighted mode	0.722228597811891	0.463673221068509	1.12496069170287	0.160793269369415			KLRG2	Acute lymphocytic leukaemia	Weighted mode	0.347347991071386	0.125726801588965	0.959625357334452	0.134112832703145
ARFGAP3	Acute Lymphoblastic Leukemia	MR Egger	2.35439786349274	0.547702498533768	10.1208033822351	0.270516070970589			CSGALNACT2	Acute lymphocytic leukaemia	MR Egger	0.59192834975684	0.0430811614151236	8.13300198362004	0.714889161332697
ARFGAP3	Acute Lymphoblastic Leukemia	Weighted median	2.23169055502953	1.01988575242801	4.88333396319267	0.0445069099313779			CSGALNACT2	Acute lymphocytic leukaemia	Weighted median	1.42496696828518	0.538476406704105	3.77088176087843	0.475675312807501
ARFGAP3	Acute Lymphoblastic Leukemia	Inverse variance weighted	2.01941705242863	1.04743913004298	3.89334818097945	0.0358713792723636			CSGALNACT2	Acute lymphocytic leukaemia	Inverse variance weighted	1.79474133315382	0.812501565543843	3.96441876487306	0.148044608169291
ARFGAP3	Acute Lymphoblastic Leukemia	Simple mode	1.95082044693358	0.491281242702355	7.74648019378959	0.358320762840687			CSGALNACT2	Acute lymphocytic leukaemia	Simple mode	1.51893383702962	0.370118254085949	6.23357528520537	0.586904207361452
ARFGAP3	Acute Lymphoblastic Leukemia	Weighted mode	2.30126456842314	0.971417887731835	5.45163794157113	0.0790600088891975			CSGALNACT2	Acute lymphocytic leukaemia	Weighted mode	1.19406684969518	0.396627213509544	3.59480033889977	0.76518040517859
ARHGAP11A	Acute Lymphoblastic Leukemia	MR Egger	1.43744277708573	0.695470391880002	2.97099885418623	0.359921262801011			CLEC4G	Acute lymphocytic leukaemia	MR Egger	0.592523760125482	0.0310685154363022	11.3003277235131	0.750868106216207
ARHGAP11A	Acute Lymphoblastic Leukemia	Weighted median	1.7992665053325	1.0646147530541	3.04087459611497	0.0282455193226618			CLEC4G	Acute lymphocytic leukaemia	Weighted median	1.03956831128733	0.436428268545103	2.47624260782985	0.930169328195441
ARHGAP11A	Acute Lymphoblastic Leukemia	Inverse variance weighted	1.93967417110186	1.21962674065355	3.08482568037463	0.00513046825582206			CLEC4G	Acute lymphocytic leukaemia	Inverse variance weighted	1.27654473862942	0.292908545794512	5.5633968114596	0.745113783568008
ARHGAP11A	Acute Lymphoblastic Leukemia	Simple mode	2.35727142318654	0.514531372015419	10.7995913656464	0.301577885991968			CLEC4G	Acute lymphocytic leukaemia	Simple mode	2.24775331877422	0.280937873685195	17.9840294075906	0.487783283517221
ARHGAP11A	Acute Lymphoblastic Leukemia	Weighted mode	1.75243099014501	1.01738693121644	3.01853137778048	0.0778009043285991			CLEC4G	Acute lymphocytic leukaemia	Weighted mode	0.782896985883574	0.302446350404933	2.02656666111184	0.640508071064884
ARHGAP15	Acute Lymphoblastic Leukemia	MR Egger	0.998147094409836	0.643960841912406	1.54714007007016	0.993414576502897			SERPINH1	Acute lymphocytic leukaemia	MR Egger	9.78746	0.420773974248712	227.662248292213	0.214618556801383
ARHGAP15	Acute Lymphoblastic Leukemia	Weighted median	0.839208188108417	0.596389926881764	1.18088913183109	0.314461251283131			SERPINH1	Acute lymphocytic leukaemia	Weighted median	1.57476222281804	0.418381247153669	5.92731169306922	0.501905100648421
ARHGAP15	Acute Lymphoblastic Leukemia	Inverse variance weighted	0.785626559718611	0.630900083849391	0.978299269782062	0.0310793057795032			SERPINH1	Acute lymphocytic leukaemia	Inverse variance weighted	1.48196644797492	0.516111474852326	4.25532982685923	0.464811330771396
ARHGAP15	Acute Lymphoblastic Leukemia	Simple mode	1.09592039111139	0.594222491323783	2.02119832418008	0.770463257581043			SERPINH1	Acute lymphocytic leukaemia	Simple mode	0.976903640994661	0.150260500981964	6.35124146100894	0.981274689200145
ARHGAP15	Acute Lymphoblastic Leukemia	Weighted mode	0.787264092494881	0.541966161725662	1.14358569796746	0.214850414606888			SERPINH1	Acute lymphocytic leukaemia	Weighted mode	2.75580096097543	0.653805439503344	11.6157475567687	0.216495024971591
ARHGAP18	Acute Lymphoblastic Leukemia	MR Egger	0.0317118722241656	0.00042606502584713	2.36030366013339	0.214559935989319			KLRB1	Acute lymphocytic leukaemia	MR Egger	0.753857372316864	0.214585405197544	2.6483671490767	0.672683678765617
ARHGAP18	Acute Lymphoblastic Leukemia	Weighted median	0.242360260844745	0.0562693641993596	1.04388057111549	0.0571242959577634			KLRB1	Acute lymphocytic leukaemia	Weighted median	0.895880957262345	0.414219443701927	1.93762678645006	0.779972542658426
ARHGAP18	Acute Lymphoblastic Leukemia	Inverse variance weighted	0.279292231276093	0.0824467167849729	0.946115909680421	0.0404640943011747			KLRB1	Acute lymphocytic leukaemia	Inverse variance weighted	0.748939450624307	0.37791892835834	1.48420801026825	0.40742525851758
ARHGAP18	Acute Lymphoblastic Leukemia	Simple mode	0.252605960850468	0.0408110943109237	1.56353982990621	0.213119038877614			KLRB1	Acute lymphocytic leukaemia	Simple mode	0.573467406899319	0.11055151567907	2.97476578910523	0.526551394790426
ARHGAP18	Acute Lymphoblastic Leukemia	Weighted mode	0.252605960850468	0.0478982236424304	1.33219494596586	0.180144451357151			KLRB1	Acute lymphocytic leukaemia	Weighted mode	0.87953511583288	0.39617003621222	1.95265151140498	0.760490065586805
ARHGEF17	Acute Lymphoblastic Leukemia	MR Egger	0.54808510243443	0.365740565260058	0.821339791217754	0.00858783954270907			CD1A	Acute lymphocytic leukaemia	MR Egger	0.893938177144599	0.161219092047922	4.95676693377649	0.902916271637903
ARHGEF17	Acute Lymphoblastic Leukemia	Weighted median	0.615770820593591	0.428752219187539	0.884365576493147	0.00865597318781295			CD1A	Acute lymphocytic leukaemia	Weighted median	1.18928092104621	0.547785085997562	2.58201463551859	0.66118345958103
ARHGEF17	Acute Lymphoblastic Leukemia	Inverse variance weighted	0.613505210078953	0.464987190585406	0.809460239797483	0.000550754771700151			CD1A	Acute lymphocytic leukaemia	Inverse variance weighted	1.50065310633037	0.752446239661041	2.99285135181678	0.249137125256231
ARHGEF17	Acute Lymphoblastic Leukemia	Simple mode	0.480538665778557	0.248080304644217	0.93081717889457	0.0414098056688233			CD1A	Acute lymphocytic leukaemia	Simple mode	3.67375874687684	0.745070595873485	18.1143953405267	0.161048960869921
ARHGEF17	Acute Lymphoblastic Leukemia	Weighted mode	0.608416329367487	0.440655723294554	0.840044529714568	0.00653171876869733			CD1A	Acute lymphocytic leukaemia	Weighted mode	1.23281684661859	0.565657417313011	2.68685131811077	0.617384339371184
ARHGEF35	Acute Lymphoblastic Leukemia	MR Egger	0.619182653506374	0.339256894582345	1.13007919522219	0.144351791127321			HABP4	Acute lymphocytic leukaemia	MR Egger	1.78282913549579	0.710504392559527	4.47355394232324	0.305757197454445
ARHGEF35	Acute Lymphoblastic Leukemia	Weighted median	0.600213465662069	0.39086733003807	0.921684102703041	0.019665618993626			HABP4	Acute lymphocytic leukaemia	Weighted median	1.55566814168514	0.859195125890665	2.81670984172001	0.144575421390734
ARHGEF35	Acute Lymphoblastic Leukemia	Inverse variance weighted	0.588418413156187	0.424234411830682	0.816143667947979	0.00148714488669548			HABP4	Acute lymphocytic leukaemia	Inverse variance weighted	1.56443570641909	0.883923424869017	2.76885871633242	0.124438934634405
ARHGEF35	Acute Lymphoblastic Leukemia	Simple mode	0.308668473907419	0.130323408627883	0.73107531323387	0.0191899459800585			HABP4	Acute lymphocytic leukaemia	Simple mode	1.19100434863966	0.30753654371559	4.61243187993429	0.812711641860841
ARHGEF35	Acute Lymphoblastic Leukemia	Weighted mode	0.610311305496109	0.386646749879203	0.963359680982025	0.0537924994677105			HABP4	Acute lymphocytic leukaemia	Weighted mode	1.49181494302128	0.80132225904221	2.77729939373164	0.275690694527768
ARHGEF40	Acute Lymphoblastic Leukemia	MR Egger	0.722300424830516	0.191301148421544	2.72720737964785	0.656348958987065			PILRA	Acute lymphocytic leukaemia	MR Egger	1.21542989468181	0.830875434966558	1.77796787185758	0.324778003358617
ARHGEF40	Acute Lymphoblastic Leukemia	Weighted median	0.504611050798077	0.200225260391442	1.27172921183736	0.14697530679423			PILRA	Acute lymphocytic leukaemia	Weighted median	1.36497910370163	0.9507611438094	1.95965933786164	0.0917308850158745
ARHGEF40	Acute Lymphoblastic Leukemia	Inverse variance weighted	0.373356603990004	0.155244591054606	0.897906669701091	0.0277694813134426			PILRA	Acute lymphocytic leukaemia	Inverse variance weighted	1.30716373258659	1.02374982076466	1.66903767808569	0.0316940550906448
ARHGEF40	Acute Lymphoblastic Leukemia	Simple mode	0.428398297356206	0.0794099838547454	2.31110865748815	0.369500848123901			PILRA	Acute lymphocytic leukaemia	Simple mode	1.6801308630242	0.965791664179088	2.92282468526567	0.0781599024986442
ARHGEF40	Acute Lymphoblastic Leukemia	Weighted mode	0.548553467689782	0.204749267313042	1.46965559810488	0.285944149028011			PILRA	Acute lymphocytic leukaemia	Weighted mode	1.15690227791769	0.831345186782304	1.60994843289039	0.395560856937031
ARHGEF5	Acute Lymphoblastic Leukemia	MR Egger	0.381522622654498	0.00680067208705515	21.4036950662912	0.720829528275268			TOMM20L	Acute lymphocytic leukaemia	MR Egger	1.49763804789208	0.245824595519286	9.12406554663909	0.67665952286543
ARHGEF5	Acute Lymphoblastic Leukemia	Weighted median	0.252623089674169	0.0389935459992807	1.63664072607556	0.148955654104597			TOMM20L	Acute lymphocytic leukaemia	Weighted median	1.03693462853389	0.523674987696124	2.05324571368805	0.917123909270917
ARHGEF5	Acute Lymphoblastic Leukemia	Inverse variance weighted	0.155070534691995	0.0316278259769358	0.760307418764634	0.0215712167378277			TOMM20L	Acute lymphocytic leukaemia	Inverse variance weighted	0.998134907699286	0.460903739763903	2.16156478677782	0.996221758852252
ARHGEF5	Acute Lymphoblastic Leukemia	Simple mode	0.260810834897787	0.0244722219717731	2.77957153537343	0.381474104214094			TOMM20L	Acute lymphocytic leukaemia	Simple mode	0.694966541261774	0.190981566612434	2.52892727837697	0.598012818647162
ARHGEF5	Acute Lymphoblastic Leukemia	Weighted mode	0.256947348203278	0.0307552013201284	2.14669184121019	0.336350394729414			TOMM20L	Acute lymphocytic leukaemia	Weighted mode	0.997019830215618	0.502402081208807	1.97859160824223	0.993428037971157
ARID5A	Acute Lymphoblastic Leukemia	MR Egger	0.927115349109596	0.336732351264318	2.55259961606692	0.885512843831107			SMPD1	Acute lymphocytic leukaemia	MR Egger	0.621047514378203	0.197401038320066	1.95389050836688	0.421954830140291
ARID5A	Acute Lymphoblastic Leukemia	Weighted median	1.39703247913285	0.75394719206841	2.58864250478564	0.288012869851464			SMPD1	Acute lymphocytic leukaemia	Weighted median	0.635723532217497	0.260704632608626	1.55020033733654	0.319221159490704
ARID5A	Acute Lymphoblastic Leukemia	Inverse variance weighted	1.78364523108151	1.10963154120908	2.86706910556388	0.0168673725587802			SMPD1	Acute lymphocytic leukaemia	Inverse variance weighted	0.861343843987195	0.489495668772568	1.51566860527085	0.604678877189465
ARID5A	Acute Lymphoblastic Leukemia	Simple mode	1.46671634536552	0.609670413991559	3.52855705048559	0.405075531788634			SMPD1	Acute lymphocytic leukaemia	Simple mode	0.602728266956355	0.113801123242029	3.19224761090973	0.556126113771666
ARID5A	Acute Lymphoblastic Leukemia	Weighted mode	1.3918883733345	0.704527270055525	2.74986267553715	0.355338064648474			SMPD1	Acute lymphocytic leukaemia	Weighted mode	0.602728266956355	0.203776488091487	1.78274425666377	0.367458971474462
ARL6IP5	Acute Lymphoblastic Leukemia	MR Egger	0.811048820535405	0.250020580015203	2.63098417439025	0.739144612525818			B4GALT6	Acute lymphocytic leukaemia	MR Egger	1.44072144127955	0.812928921206766	2.55333303713854	0.228008355784875
ARL6IP5	Acute Lymphoblastic Leukemia	Weighted median	0.562899337358712	0.239263877016306	1.3242937795298	0.188001369280605			B4GALT6	Acute lymphocytic leukaemia	Weighted median	1.38112636856855	0.780008712186693	2.44549838502161	0.26799225965224
ARL6IP5	Acute Lymphoblastic Leukemia	Inverse variance weighted	0.470788004517145	0.247690835269339	0.894830626075534	0.0214976892183814			B4GALT6	Acute lymphocytic leukaemia	Inverse variance weighted	1.24586491849073	0.794404547044105	1.95389037097209	0.338316024053119
ARL6IP5	Acute Lymphoblastic Leukemia	Simple mode	0.594744658582629	0.177455184898853	1.99329881014287	0.427556075763032			B4GALT6	Acute lymphocytic leukaemia	Simple mode	1.16185408147679	0.359214785793837	3.75793246834507	0.805048307567856
ARL6IP5	Acute Lymphoblastic Leukemia	Weighted mode	0.526403356895053	0.215886875536031	1.28354488183851	0.201086903185943			B4GALT6	Acute lymphocytic leukaemia	Weighted mode	1.34318666211772	0.767475502487788	2.35075960528087	0.315183122730243
ARMC2	Acute Lymphoblastic Leukemia	MR Egger	0.443916867963498	0.0533413652291144	3.69435961783299	0.477018084550472			HHIP	Acute lymphocytic leukaemia	MR Egger	1.65754842417661	0.228531387509195	12.0222732134763	0.638379953598376
ARMC2	Acute Lymphoblastic Leukemia	Weighted median	0.44579854482135	0.153200479033456	1.29723055579633	0.138213985751235			HHIP	Acute lymphocytic leukaemia	Weighted median	0.835470681673927	0.244079093596079	2.85977487728555	0.774625544780698
ARMC2	Acute Lymphoblastic Leukemia	Inverse variance weighted	0.398767420468297	0.168872072148954	0.94163264300257	0.0359771917010351			HHIP	Acute lymphocytic leukaemia	Inverse variance weighted	0.841022368029968	0.307208214599563	2.30240791070221	0.736148049483675
ARMC2	Acute Lymphoblastic Leukemia	Simple mode	0.395863852125974	0.0756093866718394	2.07260230928947	0.304503547791935			HHIP	Acute lymphocytic leukaemia	Simple mode	0.598560625300039	0.100402292060091	3.56839286044533	0.593554085768033
ARMC2	Acute Lymphoblastic Leukemia	Weighted mode	0.43876428089321	0.117748603570516	1.63495861819241	0.25453509502564			HHIP	Acute lymphocytic leukaemia	Weighted mode	0.811028605180259	0.198121910968287	3.32001339582235	0.780649906562054
ARMC5	Acute Lymphoblastic Leukemia	MR Egger	1.73968369088354	0.142241376447738	21.2772079398301	0.677751275287251			A4GNT	Acute lymphocytic leukaemia	MR Egger	0.00936113661870322	0.000113289466069728	0.773513035537574	0.173792130007564
ARMC5	Acute Lymphoblastic Leukemia	Weighted median	3.91895293185741	1.27357261358136	12.0591412836098	0.0172333935821312			A4GNT	Acute lymphocytic leukaemia	Weighted median	0.717161239386555	0.128064620854133	4.01609937114697	0.705255727516166
ARMC5	Acute Lymphoblastic Leukemia	Inverse variance weighted	3.95644624708166	1.60295678629168	9.76537049527059	0.00284871687477226			A4GNT	Acute lymphocytic leukaemia	Inverse variance weighted	0.767869433260825	0.105826624733517	5.57159852750701	0.793916890946148
ARMC5	Acute Lymphoblastic Leukemia	Simple mode	4.1280180374835	0.778000878276695	21.9029738829276	0.13444301158394			A4GNT	Acute lymphocytic leukaemia	Simple mode	3.96785518761721	0.0825775364650335	190.655660895955	0.535625490365656
ARMC5	Acute Lymphoblastic Leukemia	Weighted mode	3.86269255714887	1.06845305306052	13.9644823404404	0.0732483630499505			A4GNT	Acute lymphocytic leukaemia	Weighted mode	0.222389442210944	0.0394564045038394	1.25346099394541	0.186940215629371
ARPC5	Acute Lymphoblastic Leukemia	MR Egger	1.32172704088739	0.938187623706677	1.86206077171524	0.116862983497289			GCNT4	Acute lymphocytic leukaemia	MR Egger	0.0188805496695273	2.12828928673329e-07	1674.93750988448	0.56515649001037
ARPC5	Acute Lymphoblastic Leukemia	Weighted median	1.21502917840672	0.875166077140325	1.68687514626209	0.24463927439945			GCNT4	Acute lymphocytic leukaemia	Weighted median	3.0597655606642	0.354120702766194	26.4377801498039	0.309412141029078
ARPC5	Acute Lymphoblastic Leukemia	Inverse variance weighted	1.23904260427591	1.00948930091953	1.52079529105697	0.0403307042854972			GCNT4	Acute lymphocytic leukaemia	Inverse variance weighted	2.02997082556972	0.213508095868623	19.3003526910747	0.537769336822229
ARPC5	Acute Lymphoblastic Leukemia	Simple mode	1.48268872711307	0.892622506727269	2.46281697463391	0.134253369963192			GCNT4	Acute lymphocytic leukaemia	Simple mode	6.69197796137079	0.292228332012743	153.245131048825	0.319664644957933
ARPC5	Acute Lymphoblastic Leukemia	Weighted mode	1.20694677316516	0.927357701715733	1.57082915315057	0.167734050735951			GCNT4	Acute lymphocytic leukaemia	Weighted mode	8.04984867544506	0.562851154061209	115.128241685221	0.221986927777485
ARPP19	Acute Lymphoblastic Leukemia	MR Egger	0.791108734837557	0.312468117787576	2.00293404257567	0.630747013478347			SIGLEC15	Acute lymphocytic leukaemia	MR Egger	0.689400273444706	0.108660418863647	4.37392697355632	0.719543554860056
ARPP19	Acute Lymphoblastic Leukemia	Weighted median	0.539492983491657	0.266283003650035	1.09302011486714	0.0866948551226722			SIGLEC15	Acute lymphocytic leukaemia	Weighted median	1.07997705660494	0.39833197271439	2.92808642712031	0.879822922008699
ARPP19	Acute Lymphoblastic Leukemia	Inverse variance weighted	0.390793668164321	0.208724596928726	0.731680373681477	0.00332108038173249			SIGLEC15	Acute lymphocytic leukaemia	Inverse variance weighted	1.45944187940251	0.605403421491234	3.51826653722467	0.399725515583775
ARPP19	Acute Lymphoblastic Leukemia	Simple mode	0.545693914436724	0.101272022219329	2.94041574096701	0.494348857190088			SIGLEC15	Acute lymphocytic leukaemia	Simple mode	1.14205932919994	0.128301748530221	10.1658747940242	0.910946161874631
ARPP19	Acute Lymphoblastic Leukemia	Weighted mode	0.545693914436724	0.261745578323084	1.13767670942548	0.132088577589558			SIGLEC15	Acute lymphocytic leukaemia	Weighted mode	1.07963688324218	0.374654024781179	3.11117917480715	0.894018511096383
ARRB1	Acute Lymphoblastic Leukemia	MR Egger	1.28941413730087	0.64113127108789	2.59321123839464	0.489454758020031			BTNL3	Acute lymphocytic leukaemia	MR Egger	4.13427037323035e-05	5.22515388432022e-09	0.327113648657525	0.271163960319735
ARRB1	Acute Lymphoblastic Leukemia	Weighted median	1.23059017168182	0.653829523518952	2.31612693548855	0.520169539603774			BTNL3	Acute lymphocytic leukaemia	Weighted median	2.62057834174874	0.763721958665078	8.99205629395058	0.125646532664906
ARRB1	Acute Lymphoblastic Leukemia	Inverse variance weighted	1.67518755778002	1.06700681881489	2.63002382389447	0.0249729346748018			BTNL3	Acute lymphocytic leukaemia	Inverse variance weighted	3.06395078630317	0.40977083868009	22.9098645748604	0.275342811642704
ARRB1	Acute Lymphoblastic Leukemia	Simple mode	1.53152370786256	0.580304440105726	4.04195574880961	0.404890930110922			BTNL3	Acute lymphocytic leukaemia	Simple mode	12.8939200259228	0.777405161945835	213.856534241119	0.216308651694845
ARRB1	Acute Lymphoblastic Leukemia	Weighted mode	1.46154004358078	0.726702864440854	2.9394397676328	0.306472073010866			BTNL3	Acute lymphocytic leukaemia	Weighted mode	1.45182912688931	0.345855571520086	6.09447407315153	0.661125489356875
ARSB	Acute Lymphoblastic Leukemia	MR Egger	0.900777836134758	0.576629394589351	1.40714420333958	0.648378109033152			EBI3	Acute lymphocytic leukaemia	MR Egger	1.34094192052828	0.84352240063947	2.13168640556187	0.230727416554211
ARSB	Acute Lymphoblastic Leukemia	Weighted median	0.841286170658155	0.594217925914391	1.19108224453436	0.329930951435844			EBI3	Acute lymphocytic leukaemia	Weighted median	1.20518889578944	0.805801159717498	1.80252939204428	0.363500859631145
ARSB	Acute Lymphoblastic Leukemia	Inverse variance weighted	0.758819641143438	0.598602530255271	0.961919167865037	0.0225568472237929			EBI3	Acute lymphocytic leukaemia	Inverse variance weighted	1.29910143246678	0.961346542490332	1.75552150784815	0.0884953139257527
ARSB	Acute Lymphoblastic Leukemia	Simple mode	0.845039496341166	0.46937732934025	1.52135969451326	0.577403280670689			EBI3	Acute lymphocytic leukaemia	Simple mode	1.1265873373757	0.525168395066145	2.4167467819068	0.762863383018647
ARSB	Acute Lymphoblastic Leukemia	Weighted mode	0.783940623801663	0.554465835532816	1.10838732030437	0.175135089522566			EBI3	Acute lymphocytic leukaemia	Weighted mode	1.21045577767578	0.854043082365644	1.71560805299209	0.29655638447492
ASB6	Acute Lymphoblastic Leukemia	MR Egger	2.39992264404813	0.00118917102120858	4843.39812751354	0.858818627814303			HNRNPDL	Acute lymphocytic leukaemia	MR Egger	0.0567545260826513	0.000283884656346103	11.3464259475134	0.399727896253644
ASB6	Acute Lymphoblastic Leukemia	Weighted median	6.14433096907216	1.0287471017472	36.6978463350038	0.0464718569285916			HNRNPDL	Acute lymphocytic leukaemia	Weighted median	0.448725920479129	0.0739653614810087	2.72228713113965	0.383639049893323
ASB6	Acute Lymphoblastic Leukemia	Inverse variance weighted	5.55089596859883	1.12800028267956	27.3159914295518	0.0350182332637496			HNRNPDL	Acute lymphocytic leukaemia	Inverse variance weighted	0.508727576482847	0.101814754908102	2.54190806929416	0.410280385127332
ASB6	Acute Lymphoblastic Leukemia	Simple mode	16.9421080768198	1.0367866072776	276.850630661925	0.18551233489769			HNRNPDL	Acute lymphocytic leukaemia	Simple mode	1.90665224673389	0.147062709293518	24.7195418025363	0.655425352405557
ASB6	Acute Lymphoblastic Leukemia	Weighted mode	1.9873954096299	0.249569964011799	15.8261853739389	0.583011522956766			HNRNPDL	Acute lymphocytic leukaemia	Weighted mode	0.344386827240866	0.0478145095213324	2.48046645180196	0.367631652754712
ASL	Acute Lymphoblastic Leukemia	MR Egger	0.253943808992388	0.0894938064930803	0.720580123391539	0.0219862911533153			FAM163B	Acute lymphocytic leukaemia	MR Egger	0.912764773427261	0.178934840566159	4.65610570291186	0.917861327434951
ASL	Acute Lymphoblastic Leukemia	Weighted median	0.682802314439455	0.331272992157602	1.40735590175149	0.301146325977424			FAM163B	Acute lymphocytic leukaemia	Weighted median	0.827342570481471	0.373201729503084	1.83411724764055	0.640757972113493
ASL	Acute Lymphoblastic Leukemia	Inverse variance weighted	0.57801784191749	0.343668886265416	0.972170129235741	0.0387907611578973			FAM163B	Acute lymphocytic leukaemia	Inverse variance weighted	0.73842661285489	0.286855488019771	1.9008660644302	0.529632196253347
ASL	Acute Lymphoblastic Leukemia	Simple mode	0.53233902136987	0.135486253406743	2.09161318249964	0.380777625005218			FAM163B	Acute lymphocytic leukaemia	Simple mode	1.46494851766803	0.241260887296832	8.89524275344878	0.695411627174965
ASL	Acute Lymphoblastic Leukemia	Weighted mode	0.456925891878712	0.231619884131735	0.901396145032222	0.0391683611297745			FAM163B	Acute lymphocytic leukaemia	Weighted mode	0.931588984928234	0.418673346479317	2.07287625099032	0.868945268878041
ASPDH	Acute Lymphoblastic Leukemia	MR Egger	1.41642878775418	0.259928612431546	7.71854430341769	0.695819746154051			DSC1	Acute lymphocytic leukaemia	MR Egger	0.27539178345179	0.019814907179213	3.82745342720146	0.38096270636127
ASPDH	Acute Lymphoblastic Leukemia	Weighted median	2.08019302896916	0.904999854991833	4.78144058687273	0.0845409182996784			DSC1	Acute lymphocytic leukaemia	Weighted median	1.14107463904064	0.354622307818121	3.67165658548906	0.824835577088183
ASPDH	Acute Lymphoblastic Leukemia	Inverse variance weighted	2.1632599661572	1.08365009985996	4.31845452861877	0.0286859813048898			DSC1	Acute lymphocytic leukaemia	Inverse variance weighted	1.71812928023957	0.658827288412528	4.48064048884411	0.26841570317018
ASPDH	Acute Lymphoblastic Leukemia	Simple mode	1.79357258914963	0.517948523442156	6.21085394967472	0.376370446660937			DSC1	Acute lymphocytic leukaemia	Simple mode	0.869695682851401	0.0939825744825266	8.04798745868565	0.906137349134639
ASPDH	Acute Lymphoblastic Leukemia	Weighted mode	2.00858862415248	0.804317987260396	5.01596175266014	0.163389493891755			DSC1	Acute lymphocytic leukaemia	Weighted mode	0.900285391300735	0.248010940980473	3.26805657276762	0.878361588965338
ASUN	Acute Lymphoblastic Leukemia	MR Egger	13.7937201555304	0.0148136421820548	12844.0199507165	0.589373459981031			C6orf89	Acute lymphocytic leukaemia	MR Egger	1.37879724020669	0.25788096677542	7.37193540637363	0.72632781987175
ASUN	Acute Lymphoblastic Leukemia	Weighted median	0.262157547325512	0.0416959970935235	1.64827763839237	0.153506292101646			C6orf89	Acute lymphocytic leukaemia	Weighted median	1.45749564017046	0.424311208269356	5.00645163199976	0.549605357186217
ASUN	Acute Lymphoblastic Leukemia	Inverse variance weighted	0.180432310380693	0.0344356190492143	0.945411162284809	0.0427207602548745			C6orf89	Acute lymphocytic leukaemia	Inverse variance weighted	1.69417999458871	0.60871173185257	4.71527934138743	0.312746078654658
ASUN	Acute Lymphoblastic Leukemia	Simple mode	0.268512506220127	0.0260779399395106	2.76474929246143	0.384235286034407			C6orf89	Acute lymphocytic leukaemia	Simple mode	1.05770054341479	0.193718765760965	5.77502357680914	0.950863799909385
ASUN	Acute Lymphoblastic Leukemia	Weighted mode	0.296327156541974	0.0301711837008011	2.91038576991329	0.406271219862401			C6orf89	Acute lymphocytic leukaemia	Weighted mode	1.45242782698798	0.41751641371727	5.05260757014824	0.5828317296749
ATF3	Acute Lymphoblastic Leukemia	MR Egger	0.607996891941772	0.0127042226889227	29.0974292298241	0.817232801442838			MRAP2	Acute lymphocytic leukaemia	MR Egger	0.00607549971790109	2.51808413379616e-06	14.6586431830495	0.327712191479865
ATF3	Acute Lymphoblastic Leukemia	Weighted median	4.07387611548209	0.885692062190546	18.7384163331532	0.0712172796016567			MRAP2	Acute lymphocytic leukaemia	Weighted median	0.876844010392748	0.041986175067648	18.3121091007423	0.932449418887212
ATF3	Acute Lymphoblastic Leukemia	Inverse variance weighted	3.99131187716116	1.17120256591036	13.6018917345738	0.0269235011933545			MRAP2	Acute lymphocytic leukaemia	Inverse variance weighted	1.17626539724437	0.0862384153469624	16.0438973650874	0.903077489119673
ATF3	Acute Lymphoblastic Leukemia	Simple mode	10.755470015563	0.696362469080521	166.120577130498	0.164185929396538			MRAP2	Acute lymphocytic leukaemia	Simple mode	1.01998975008143	0.0106940033290829	97.2862134278394	0.993743383823642
ATF3	Acute Lymphoblastic Leukemia	Weighted mode	1.23655671583145	0.115495370033102	13.2392537556235	0.869187076266553			MRAP2	Acute lymphocytic leukaemia	Weighted mode	1.4097020701854	0.0424647400983183	46.7978827159641	0.859890860585696
ATF5	Acute Lymphoblastic Leukemia	MR Egger	0.516648003134762	0.0857282088987051	3.11362108892921	0.489433701485694			OSMR	Acute lymphocytic leukaemia	MR Egger	0.299066392587977	0.00734759419198726	12.172788104319	0.568639782065335
ATF5	Acute Lymphoblastic Leukemia	Weighted median	0.398100400067901	0.126267930751862	1.25513998360891	0.115923217327087			OSMR	Acute lymphocytic leukaemia	Weighted median	1.32186016882073	0.386800442721654	4.51735342808842	0.656282171403915
ATF5	Acute Lymphoblastic Leukemia	Inverse variance weighted	0.355530915909125	0.149550289160033	0.845215565126179	0.0192522567514802			OSMR	Acute lymphocytic leukaemia	Inverse variance weighted	1.50789520244687	0.499801285423421	4.54930390912463	0.466003985065544
ATF5	Acute Lymphoblastic Leukemia	Simple mode	0.214126241792359	0.0348294568827286	1.31641580224744	0.127228466551493			OSMR	Acute lymphocytic leukaemia	Simple mode	1.30487287945891	0.306754948186617	5.55066264330166	0.736880603612917
ATF5	Acute Lymphoblastic Leukemia	Weighted mode	0.38610329079134	0.0941102922211554	1.58405364218379	0.21582556809982			OSMR	Acute lymphocytic leukaemia	Weighted mode	1.26280946196237	0.353505254173241	4.51107223554926	0.737597684083196
ATG10	Acute Lymphoblastic Leukemia	MR Egger	1.17726112646284	0.781631329795317	1.77314253798334	0.439929354649209			STMN2	Acute lymphocytic leukaemia	MR Egger	0.77646409212792	0.00020642981993818	2920.58815216031	0.957445815652303
ATG10	Acute Lymphoblastic Leukemia	Weighted median	1.45413073989599	1.0244797892927	2.0639706422811	0.0361399425442356			STMN2	Acute lymphocytic leukaemia	Weighted median	0.433927354097676	0.0896822246293575	2.09955706844244	0.299315637545902
ATG10	Acute Lymphoblastic Leukemia	Inverse variance weighted	1.57922166929261	1.16771795978886	2.1357392509526	0.00301023009771654			STMN2	Acute lymphocytic leukaemia	Inverse variance weighted	0.380463766785662	0.068833237160654	2.10294741040419	0.267932092601542
ATG10	Acute Lymphoblastic Leukemia	Simple mode	1.69967779060135	0.854763067811109	3.37977236108416	0.13889719294839			STMN2	Acute lymphocytic leukaemia	Simple mode	0.177068771910364	0.0125903957651605	2.4902592873692	0.289462080301193
ATG10	Acute Lymphoblastic Leukemia	Weighted mode	1.53573225005185	1.1044622044851	2.13540448398488	0.0150188132692068			STMN2	Acute lymphocytic leukaemia	Weighted mode	0.479686446388499	0.0718010275808224	3.20467679365475	0.503492562072724
ATG16L1	Acute Lymphoblastic Leukemia	MR Egger	0.264532990653632	0.0679423758636489	1.02995666923085	0.0914760341621462			ASPRV1	Acute lymphocytic leukaemia	MR Egger	1.55885875084496	0.363383509719702	6.68726163980399	0.563440397496951
ATG16L1	Acute Lymphoblastic Leukemia	Weighted median	0.392534295669633	0.173950989554243	0.885784976973682	0.0243171042589026			ASPRV1	Acute lymphocytic leukaemia	Weighted median	1.04807389881291	0.356439255928987	3.08175622943095	0.932000707661859
ATG16L1	Acute Lymphoblastic Leukemia	Inverse variance weighted	0.432366591313462	0.206135007759924	0.906885595588612	0.0265128117890257			ASPRV1	Acute lymphocytic leukaemia	Inverse variance weighted	0.701722330893168	0.320050389518425	1.53855219615595	0.376507948609267
ATG16L1	Acute Lymphoblastic Leukemia	Simple mode	0.358825711477155	0.0894595495958364	1.43926379910009	0.182031849842436			ASPRV1	Acute lymphocytic leukaemia	Simple mode	0.425997439251814	0.0649383972644666	2.7945533905008	0.392945078039654
ATG16L1	Acute Lymphoblastic Leukemia	Weighted mode	0.358825711477155	0.15380760539427	0.8371230465947	0.0418172857216604			ASPRV1	Acute lymphocytic leukaemia	Weighted mode	1.61349768847941	0.49097912673859	5.30241439798418	0.44727771080356
ATG9A	Acute Lymphoblastic Leukemia	MR Egger	0.155279286716614	0.0163546010899771	1.47430418819553	0.165739907986154			STX8	Acute lymphocytic leukaemia	MR Egger	80.769713204297	0.0726887265927952	89749.0832058547	0.344554978592438
ATG9A	Acute Lymphoblastic Leukemia	Weighted median	0.225772024834207	0.0542508003101626	0.939580741782888	0.0407893570642019			STX8	Acute lymphocytic leukaemia	Weighted median	0.948631175819835	0.121018360671717	7.43607088000854	0.959964835042788
ATG9A	Acute Lymphoblastic Leukemia	Inverse variance weighted	0.309081581863675	0.0984998579891875	0.969863573385436	0.0441728422194322			STX8	Acute lymphocytic leukaemia	Inverse variance weighted	0.457106843178794	0.0846113541801044	2.46948731769636	0.363031886680393
ATG9A	Acute Lymphoblastic Leukemia	Simple mode	0.14619364027521	0.0157391604489217	1.35792379309417	0.1418018767758			STX8	Acute lymphocytic leukaemia	Simple mode	0.085930061296894	0.0045077846181401	1.63804974283234	0.201210198494312
ATG9A	Acute Lymphoblastic Leukemia	Weighted mode	0.140352052106069	0.0202482853666156	0.972857611087559	0.0939947207611121			STX8	Acute lymphocytic leukaemia	Weighted mode	1.09339244811594	0.110679128922772	10.8015581368657	0.943906835668976
ATOX1	Acute Lymphoblastic Leukemia	MR Egger	1.28717772601194	0.576254755747223	2.87516325343447	0.54389269696062			NTM	Acute lymphocytic leukaemia	MR Egger	1.10449955062296	0.456563329557541	2.67196066427092	0.829905672828628
ATOX1	Acute Lymphoblastic Leukemia	Weighted median	1.82531518398442	1.04626004586544	3.18446215551328	0.0340682076304735			NTM	Acute lymphocytic leukaemia	Weighted median	1.21818173348709	0.75055027360378	1.97717166723066	0.424455346846399
ATOX1	Acute Lymphoblastic Leukemia	Inverse variance weighted	1.7830501020809	1.21816741879236	2.60987744170871	0.00292715826671182			NTM	Acute lymphocytic leukaemia	Inverse variance weighted	1.02555573208681	0.643268611162335	1.63503168251231	0.915550743752886
ATOX1	Acute Lymphoblastic Leukemia	Simple mode	1.89172458055528	0.65302769000779	5.48004616562948	0.251168697792041			NTM	Acute lymphocytic leukaemia	Simple mode	0.605122984665128	0.228672902663387	1.6012995956458	0.33340431509235
ATOX1	Acute Lymphoblastic Leukemia	Weighted mode	1.85889134618047	1.03826418326391	3.3281289026478	0.0473042173486138			NTM	Acute lymphocytic leukaemia	Weighted mode	1.0344208478224	0.605939983392838	1.76589517070358	0.903533987094068
ATP5G1	Acute Lymphoblastic Leukemia	MR Egger	1.34526252306225	0.702817337671823	2.5749667217243	0.380283200031234			GALNT13	Acute lymphocytic leukaemia	MR Egger	0.4951417952109	0.000211997614980273	1156.45356381715	0.875375544308789
ATP5G1	Acute Lymphoblastic Leukemia	Weighted median	2.10517045641996	1.17579323615873	3.76915133910937	0.0122468518397817			GALNT13	Acute lymphocytic leukaemia	Weighted median	0.999166821017324	0.10601673223662	9.41676200690349	0.999418936996516
ATP5G1	Acute Lymphoblastic Leukemia	Inverse variance weighted	2.1676971756687	1.48393694662015	3.16652	6.29781752917654e-05			GALNT13	Acute lymphocytic leukaemia	Inverse variance weighted	0.4691178809344	0.0794476454135716	2.77002024499002	0.403473534687979
ATP5G1	Acute Lymphoblastic Leukemia	Simple mode	2.06725637411943	0.779799096953194	5.48032042231763	0.157820666354097			GALNT13	Acute lymphocytic leukaemia	Simple mode	1.08121705390428	0.0472447775013693	24.7441173285147	0.964079558733159
ATP5G1	Acute Lymphoblastic Leukemia	Weighted mode	1.9857513051574	1.18432431583487	3.32950036844816	0.0159538098932658			GALNT13	Acute lymphocytic leukaemia	Weighted mode	1.09076484296645	0.0513041357628017	23.1904879589507	0.959079041589575
ATP6AP1L	Acute Lymphoblastic Leukemia	MR Egger	1.32088434338368	0.89075747440821	1.95870986067816	0.172233948060448			PLA2R1	Acute lymphocytic leukaemia	MR Egger	0.979168278540305	0.555661063748028	1.72545924170485	0.942599521065595
ATP6AP1L	Acute Lymphoblastic Leukemia	Weighted median	1.5589178629839	1.17221589892808	2.07318882618174	0.00227027173432254			PLA2R1	Acute lymphocytic leukaemia	Weighted median	1.15944489341146	0.70252685270897	1.91353889986439	0.562752794336729
ATP6AP1L	Acute Lymphoblastic Leukemia	Inverse variance weighted	1.41290758746072	1.14713850714813	1.74025005547676	0.0011493598084593			PLA2R1	Acute lymphocytic leukaemia	Inverse variance weighted	1.22762863882903	0.832384065162728	1.81054892560753	0.30088462727247
ATP6AP1L	Acute Lymphoblastic Leukemia	Simple mode	1.00453552852634	0.526463139529003	1.91673747372794	0.989099659622859			PLA2R1	Acute lymphocytic leukaemia	Simple mode	1.06063859063228	0.4440678091699	2.53329378240976	0.89571741132402
ATP6AP1L	Acute Lymphoblastic Leukemia	Weighted mode	1.38909838521613	1.00893679598653	1.91250267755705	0.0491384746641108			PLA2R1	Acute lymphocytic leukaemia	Weighted mode	1.11082628340631	0.694395084938769	1.77699275048164	0.665132219144436
ATP6V0A1	Acute Lymphoblastic Leukemia	MR Egger	24.8915803765351	1.66089821816624	373.045600786775	0.2583565401253			CYB5D2	Acute lymphocytic leukaemia	MR Egger	0.567386541159747	0.210078288635497	1.53241674415861	0.314401619993128
ATP6V0A1	Acute Lymphoblastic Leukemia	Weighted median	6.40142013204542	1.48367484232254	27.6193802968373	0.0128135925470252			CYB5D2	Acute lymphocytic leukaemia	Weighted median	0.627174590934327	0.303426072551698	1.29635520179836	0.207903035200529
ATP6V0A1	Acute Lymphoblastic Leukemia	Inverse variance weighted	6.66620928421864	1.58299281764866	28.0723612423021	0.00970498709940171			CYB5D2	Acute lymphocytic leukaemia	Inverse variance weighted	0.643403161073336	0.306066715132129	1.3525404992191	0.244689801463543
ATP6V0A1	Acute Lymphoblastic Leukemia	Simple mode	5.19892170940266	0.533219352122181	50.6898086742826	0.291752824822531			CYB5D2	Acute lymphocytic leukaemia	Simple mode	0.899754884039037	0.220085794076645	3.67837849211736	0.887920732682046
ATP6V0A1	Acute Lymphoblastic Leukemia	Weighted mode	6.9073067866603	1.2625855949855	37.7882396524501	0.155620985750593			CYB5D2	Acute lymphocytic leukaemia	Weighted mode	0.642970657336405	0.320940639158683	1.28812377042474	0.259272060002329
ATP7B	Acute Lymphoblastic Leukemia	MR Egger	1.31202242462024	0.604783669870531	2.8463117118802	0.500658700097338			CALN1	Acute lymphocytic leukaemia	MR Egger	0.98518966181478	0.0486014845025987	19.9705560371273	0.99312799191632
ATP7B	Acute Lymphoblastic Leukemia	Weighted median	1.99238426130447	1.06924995500214	3.71250428968764	0.0299414356437303			CALN1	Acute lymphocytic leukaemia	Weighted median	1.17663273975002	0.406248645504052	3.40792423451376	0.764339809001688
ATP7B	Acute Lymphoblastic Leukemia	Inverse variance weighted	1.92915866019848	1.20789021544265	3.08111870486089	0.00594747660780366			CALN1	Acute lymphocytic leukaemia	Inverse variance weighted	1.2860009807202	0.467646380423828	3.53642964351502	0.625996560806416
ATP7B	Acute Lymphoblastic Leukemia	Simple mode	1.62041126357699	0.549084496591385	4.7820193056392	0.392921285376688			CALN1	Acute lymphocytic leukaemia	Simple mode	1.76624035513969	0.27349500286259	11.4064423827566	0.592135237020732
ATP7B	Acute Lymphoblastic Leukemia	Weighted mode	1.95858166968472	1.09331304902632	3.50864023825681	0.0357640323950814			CALN1	Acute lymphocytic leukaemia	Weighted mode	1.15296204093669	0.33027175595734	4.0249323287959	0.837750371003183
ATP8B2	Acute Lymphoblastic Leukemia	MR Egger	1.00681379458916	0.251444696537861	4.03139947245769	0.992613042342175			CD58	Acute lymphocytic leukaemia	MR Egger	0.509464461433083	0.195032257326062	1.33082619778824	0.399949763545067
ATP8B2	Acute Lymphoblastic Leukemia	Weighted median	0.626665236785058	0.248777496952828	1.57855643619301	0.321446217448099			CD58	Acute lymphocytic leukaemia	Weighted median	0.801000862143495	0.364439778881784	1.76051687640482	0.580765322359694
ATP8B2	Acute Lymphoblastic Leukemia	Inverse variance weighted	0.459647789333777	0.21399933745599	0.987274506318873	0.0462795069374514			CD58	Acute lymphocytic leukaemia	Inverse variance weighted	0.820889605207783	0.320435946753648	2.10294678473216	0.680910132038558
ATP8B2	Acute Lymphoblastic Leukemia	Simple mode	0.661556758568708	0.13187514259626	3.31872509247506	0.629107857854028			CD58	Acute lymphocytic leukaemia	Simple mode	0.46423693081873	0.0857819717379102	2.5123685498214	0.467070782446112
ATP8B2	Acute Lymphoblastic Leukemia	Weighted mode	0.642567361483001	0.243439217735729	1.69608174838719	0.397857553211888			CD58	Acute lymphocytic leukaemia	Weighted mode	0.727598775138413	0.309520437918502	1.71038778939151	0.541698337969711
ATPAF1	Acute Lymphoblastic Leukemia	MR Egger	1.11454266255338	0.127724573078309	9.72565667445978	0.924590754892512			PLEKHA4	Acute lymphocytic leukaemia	MR Egger	0.241272510581229	0.00314611081851571	18.5029796215611	0.586556122974757
ATPAF1	Acute Lymphoblastic Leukemia	Weighted median	3.74196028336298	1.34918702115299	10.3782993334014	0.0112301855218643			PLEKHA4	Acute lymphocytic leukaemia	Weighted median	1.35453125335356	0.252689663238214	7.26090213900803	0.723165050332314
ATPAF1	Acute Lymphoblastic Leukemia	Inverse variance weighted	3.28156769715763	1.48072799626482	7.27256226544834	0.00342470290911886			PLEKHA4	Acute lymphocytic leukaemia	Inverse variance weighted	2.04567104095736	0.508314151948701	8.23264509116776	0.313695122141685
ATPAF1	Acute Lymphoblastic Leukemia	Simple mode	5.04402016562426	0.935173734224061	27.2057891492582	0.0966005719976493			PLEKHA4	Acute lymphocytic leukaemia	Simple mode	1.13171155476372	0.0973449868791935	13.1570313402495	0.927488687012604
ATPAF1	Acute Lymphoblastic Leukemia	Weighted mode	4.05531707173666	0.921887039479958	17.8390582013127	0.10110535624653			PLEKHA4	Acute lymphocytic leukaemia	Weighted mode	1.06747314664431	0.173061292134592	6.58436617889399	0.948349473253228
ATPIF1	Acute Lymphoblastic Leukemia	MR Egger	1.97417210466706	0.689556526381585	5.65197391328706	0.227254918456165			SRL	Acute lymphocytic leukaemia	MR Egger	0.772695141919494	0.0513664987310986	11.6234860676714	0.861171642211164
ATPIF1	Acute Lymphoblastic Leukemia	Weighted median	2.42141709374968	1.26828789155867	4.62297304967365	0.00735488050523924			SRL	Acute lymphocytic leukaemia	Weighted median	1.04850657072477	0.385868988077261	2.84906551918316	0.926003738187124
ATPIF1	Acute Lymphoblastic Leukemia	Inverse variance weighted	2.67542236650115	1.61339857516651	4.43652606947163	0.000136883478674841			SRL	Acute lymphocytic leukaemia	Inverse variance weighted	0.9542373091537	0.312870395079046	2.91037073658197	0.93438148090932
ATPIF1	Acute Lymphoblastic Leukemia	Simple mode	4.87997025044138	1.2548682020436	18.9773791434118	0.0382348670153128			SRL	Acute lymphocytic leukaemia	Simple mode	1.63221977886655	0.350373213349538	7.60372455717778	0.559935430939292
ATPIF1	Acute Lymphoblastic Leukemia	Weighted mode	2.7610508941203	1.38862553887094	5.48989041791706	0.0117281477689023			SRL	Acute lymphocytic leukaemia	Weighted mode	1.04840340807285	0.355623081371085	3.09077156021778	0.935036834195481
ATRAID	Acute Lymphoblastic Leukemia	MR Egger	1.63878582184697	0.888504981480843	3.02262680104576	0.127417207797878			STX6	Acute lymphocytic leukaemia	MR Egger	0.0531329289324485	0.000191988159227589	14.7045950557504	0.492758640858245
ATRAID	Acute Lymphoblastic Leukemia	Weighted median	1.67810563159892	1.04221792788338	2.70196706030863	0.0331586809578026			STX6	Acute lymphocytic leukaemia	Weighted median	1.69702551773781	0.378600947189577	7.60667829605621	0.489567376592278
ATRAID	Acute Lymphoblastic Leukemia	Inverse variance weighted	1.54911700625463	1.09060012681538	2.20040640016681	0.0145112145244201			STX6	Acute lymphocytic leukaemia	Inverse variance weighted	1.72114971473179	0.401301086294276	7.38187969506018	0.464819786043007
ATRAID	Acute Lymphoblastic Leukemia	Simple mode	1.5696110607458	0.707290340732147	3.48326385945733	0.278636124542075			STX6	Acute lymphocytic leukaemia	Simple mode	0.685847562185628	0.0774230587120938	6.0755398505393	0.767004417299556
ATRAID	Acute Lymphoblastic Leukemia	Weighted mode	1.5696110607458	0.972591584302707	2.53310734102421	0.0772342718464121			STX6	Acute lymphocytic leukaemia	Weighted mode	1.20748198723361	0.264223674187933	5.51810035181255	0.830523260867648
AVPI1	Acute Lymphoblastic Leukemia	MR Egger	4.08441302510467	1.0442180112978	15.9760026921113	0.0828635690171441			PLD3	Acute lymphocytic leukaemia	MR Egger	288.255181725777	0.0748823375315871	1109621.47457952	0.271361118639485
AVPI1	Acute Lymphoblastic Leukemia	Weighted median	3.46404519612953	1.35055469475861	8.88494865657607	0.00972863415634396			PLD3	Acute lymphocytic leukaemia	Weighted median	0.570887220133812	0.0543880650592978	5.99234809616372	0.640266871158836
AVPI1	Acute Lymphoblastic Leukemia	Inverse variance weighted	4.44625528825613	1.96366318581202	10.0675035470355	0.000345715947436187			PLD3	Acute lymphocytic leukaemia	Inverse variance weighted	0.316855322625778	0.0369227036766358	2.71912090608402	0.294671341100278
AVPI1	Acute Lymphoblastic Leukemia	Simple mode	4.98928739724253	1.03237320220371	24.1123933468502	0.0805614802535799			PLD3	Acute lymphocytic leukaemia	Simple mode	0.366752353614777	0.009399681015062	14.3097716471915	0.620014063943914
AVPI1	Acute Lymphoblastic Leukemia	Weighted mode	3.64762215324579	1.28117066493851	10.3851483154964	0.041580195726245			PLD3	Acute lymphocytic leukaemia	Weighted mode	0.49283912990355	0.0179550300005806	13.5277082776377	0.69694469117765
B3GALTL	Acute Lymphoblastic Leukemia	MR Egger	1.35208330657972	0.82731171467868	2.20972244861973	0.240486349677282			CLEC2A	Acute lymphocytic leukaemia	MR Egger	0.811214709695404	0.217470318719402	3.02601894870671	0.77098285764267
B3GALTL	Acute Lymphoblastic Leukemia	Weighted median	1.41143187223449	0.933535454618583	2.13397350909752	0.102278865693753			CLEC2A	Acute lymphocytic leukaemia	Weighted median	0.939822129871328	0.383940021429371	2.30053025602167	0.891910542444463
B3GALTL	Acute Lymphoblastic Leukemia	Inverse variance weighted	1.40279936931417	1.05060530291511	1.87305933549742	0.0217512320841249			CLEC2A	Acute lymphocytic leukaemia	Inverse variance weighted	0.869915100051314	0.339269002818624	2.23053764125293	0.771751028743535
B3GALTL	Acute Lymphoblastic Leukemia	Simple mode	1.44801767368569	0.755705736317636	2.77456565768982	0.275131470982037			CLEC2A	Acute lymphocytic leukaemia	Simple mode	0.881294895380474	0.127583212360156	6.08764020168408	0.90302287546348
B3GALTL	Acute Lymphoblastic Leukemia	Weighted mode	1.34913973517466	0.917718165615251	1.98337364697023	0.140247736926765			CLEC2A	Acute lymphocytic leukaemia	Weighted mode	0.931799265093192	0.398867807821873	2.17678602635176	0.87677237955763
BAG5	Acute Lymphoblastic Leukemia	MR Egger	2.67287273738836	0.555215593999693	12.867521639311	0.243654723636158			CLEC10A	Acute lymphocytic leukaemia	MR Egger	0.246786253266662	0.00203740031338976	29.8927286901551	0.625196493207733
BAG5	Acute Lymphoblastic Leukemia	Weighted median	0.491281937332771	0.230313292155994	1.04795489522145	0.0659424832985482			CLEC10A	Acute lymphocytic leukaemia	Weighted median	1.57814869291063	0.368994133912776	6.74957422906957	0.538318345452152
BAG5	Acute Lymphoblastic Leukemia	Inverse variance weighted	0.456175820138181	0.247063310522573	0.842279569712678	0.0121210179746835			CLEC10A	Acute lymphocytic leukaemia	Inverse variance weighted	1.83994970579924	0.508932768282399	6.65198849603686	0.352422742024641
BAG5	Acute Lymphoblastic Leukemia	Simple mode	0.521752333119858	0.170512268778792	1.59651560011308	0.274804129474834			CLEC10A	Acute lymphocytic leukaemia	Simple mode	1.64495016259633	0.207754049278951	13.0243480058122	0.669476897967011
BAG5	Acute Lymphoblastic Leukemia	Weighted mode	0.532867683800923	0.235593789995957	1.20524385827077	0.154535801366435			CLEC10A	Acute lymphocytic leukaemia	Weighted mode	1.21294067084902	0.220672493233076	6.66700706302233	0.83854364300191
BAK1	Acute Lymphoblastic Leukemia	MR Egger	0.72146561142264	0.528595203328368	0.984709329914402	0.0460765897389785			BET1L	Acute lymphocytic leukaemia	MR Egger	0.117428261543779	0.000136379734339954	101.110305544528	0.59783137773818
BAK1	Acute Lymphoblastic Leukemia	Weighted median	0.804394786152164	0.612278343907399	1.05679219006747	0.117987174617815			BET1L	Acute lymphocytic leukaemia	Weighted median	1.21898297223577	0.169988076115791	8.74131598259035	0.843821799257589
BAK1	Acute Lymphoblastic Leukemia	Inverse variance weighted	0.816788369535654	0.685956521099257	0.972573654580327	0.0230719703340364			BET1L	Acute lymphocytic leukaemia	Inverse variance weighted	1.79765990137935	0.327073202359752	9.88029926546154	0.499946632936528
BAK1	Acute Lymphoblastic Leukemia	Simple mode	0.889797115246174	0.531956674961146	1.48835223537376	0.658700752057394			BET1L	Acute lymphocytic leukaemia	Simple mode	1.05373347581486	0.0710437459842256	15.6291623234422	0.972045782127927
BAK1	Acute Lymphoblastic Leukemia	Weighted mode	0.862298606565139	0.653322482812411	1.13811923888387	0.301405767805906			BET1L	Acute lymphocytic leukaemia	Weighted mode	1.05373347581486	0.151898232268799	7.3098562206305	0.961089991386692
BAZ2B	Acute Lymphoblastic Leukemia	MR Egger	0.987434750457057	0.685759143060212	1.42182192724273	0.94605844255065			SPINK7	Acute lymphocytic leukaemia	MR Egger	0.592572851052549	0.0332448490819138	10.5623154714689	0.733986934878226
BAZ2B	Acute Lymphoblastic Leukemia	Weighted median	0.721864627780918	0.523914840139391	0.994605422329027	0.0462528330423225			SPINK7	Acute lymphocytic leukaemia	Weighted median	2.14788716841199	0.53461002458709	8.62950389265914	0.28128645693694
BAZ2B	Acute Lymphoblastic Leukemia	Inverse variance weighted	0.772725448971014	0.622687591785082	0.958915236733259	0.0192375998184819			SPINK7	Acute lymphocytic leukaemia	Inverse variance weighted	2.09063589777051	0.689995748407426	6.3344715777377	0.192263075938787
BAZ2B	Acute Lymphoblastic Leukemia	Simple mode	0.589970497951422	0.338325425848119	1.02878814851267	0.0683412575004878			SPINK7	Acute lymphocytic leukaemia	Simple mode	3.36693037229712	0.343464378731817	33.0055191567575	0.331886590028437
BAZ2B	Acute Lymphoblastic Leukemia	Weighted mode	0.736774791140957	0.534204976532652	1.01615880927238	0.0680085010670657			SPINK7	Acute lymphocytic leukaemia	Weighted mode	2.25856607682249	0.463304554564529	11.0102969485548	0.346992750062435
BCAS1	Acute Lymphoblastic Leukemia	MR Egger	1.81168837445056	0.240667001562842	13.6379925158218	0.579804450285314			UCMA	Acute lymphocytic leukaemia	MR Egger	1.16106427691196	0.365072801139859	3.69260665519876	0.805405619879024
BCAS1	Acute Lymphoblastic Leukemia	Weighted median	3.33019514330912	1.45213165607934	7.63718609541399	0.00449866975629729			UCMA	Acute lymphocytic leukaemia	Weighted median	1.50352925134014	0.577001511614563	3.91784105263406	0.403942968966986
BCAS1	Acute Lymphoblastic Leukemia	Inverse variance weighted	3.13276346278229	1.46798383308549	6.68550067960602	0.00315099171085511			UCMA	Acute lymphocytic leukaemia	Inverse variance weighted	1.02051789191713	0.470459400442579	2.21370168550836	0.959000434521633
BCAS1	Acute Lymphoblastic Leukemia	Simple mode	6.97870927184468	1.52668670890229	31.900705506206	0.033548768663075			UCMA	Acute lymphocytic leukaemia	Simple mode	2.05144007167386	0.446014494237546	9.43558207646022	0.375843764750694
BCAS1	Acute Lymphoblastic Leukemia	Weighted mode	3.45968382268098	1.27757	9.36885405779503	0.037245094172026			UCMA	Acute lymphocytic leukaemia	Weighted mode	1.58755477342244	0.600480007404785	4.19719245859493	0.371446849369856
BCAT2	Acute Lymphoblastic Leukemia	MR Egger	2.68658455067882	0.990964471044559	7.28354725002202	0.0725123390131384			LRRK2	Acute lymphocytic leukaemia	MR Egger	6.98128490989959	0.0361118963360929	1349.64773213749	0.492838511348973
BCAT2	Acute Lymphoblastic Leukemia	Weighted median	2.37984	1.21117680843612	4.67614812619802	0.0118707177797868			LRRK2	Acute lymphocytic leukaemia	Weighted median	0.574567695468976	0.133285186598153	2.47685466856753	0.457277849868939
BCAT2	Acute Lymphoblastic Leukemia	Inverse variance weighted	2.54802457574729	1.56240861803821	4.15539773888611	0.000178082417246436			LRRK2	Acute lymphocytic leukaemia	Inverse variance weighted	0.98739648101219	0.261138398687933	3.73346783013841	0.985087329383225
BCAT2	Acute Lymphoblastic Leukemia	Simple mode	2.23084922938525	0.744506968599041	6.68454224627815	0.172351899640666			LRRK2	Acute lymphocytic leukaemia	Simple mode	0.470203624514748	0.038681906220054	5.71562960855805	0.570121613135899
BCAT2	Acute Lymphoblastic Leukemia	Weighted mode	2.10721687023317	1.04072513407172	4.26660488233128	0.0560337010101876			LRRK2	Acute lymphocytic leukaemia	Weighted mode	0.24304683923717	0.022577977321562	2.61634446796812	0.276927361085347
BCCIP	Acute Lymphoblastic Leukemia	MR Egger	0.189053928021714	0.0364189562177309	0.981395169228886	0.0878768542866904			IL5	Acute lymphocytic leukaemia	MR Egger	305.232543046342	4.21090399026374e-07	221251554416.707	0.680060157730539
BCCIP	Acute Lymphoblastic Leukemia	Weighted median	0.227610807101847	0.0718481052526403	0.721058395727847	0.011873175970569			IL5	Acute lymphocytic leukaemia	Weighted median	1.14672824730663	0.101411036653886	12.966889172615	0.911903965681209
BCCIP	Acute Lymphoblastic Leukemia	Inverse variance weighted	0.281181652110835	0.117486612311823	0.672954304563111	0.00437774669089186			IL5	Acute lymphocytic leukaemia	Inverse variance weighted	0.893730269181955	0.0977067191945896	8.17501396665748	0.920751395535963
BCCIP	Acute Lymphoblastic Leukemia	Simple mode	0.201725549224803	0.0361253867812391	1.12644322554857	0.105552464413204			IL5	Acute lymphocytic leukaemia	Simple mode	1.40510881704628	0.0727000363881847	27.1572187006784	0.842812492995501
BCCIP	Acute Lymphoblastic Leukemia	Weighted mode	0.184015957301329	0.0424299182800568	0.798065938237745	0.0536107668083134			IL5	Acute lymphocytic leukaemia	Weighted mode	1.31942088827496	0.0604322117696757	28.8070125093424	0.876364048491289
BCKDK	Acute Lymphoblastic Leukemia	MR Egger	1.16684674081441	0.41975296737251	3.24364905642448	0.770277895834764			N6AMT1	Acute lymphocytic leukaemia	MR Egger	10.5895144635874	0.00104250504679996	107565.730179188	0.704152070376068
BCKDK	Acute Lymphoblastic Leukemia	Weighted median	0.473848136621643	0.273667821772186	0.820454721807646	0.0076633711805538			N6AMT1	Acute lymphocytic leukaemia	Weighted median	1.02392170908081	0.0691807949111151	15.1547213019738	0.986281155594429
BCKDK	Acute Lymphoblastic Leukemia	Inverse variance weighted	0.411094395404311	0.277859938816567	0.608215069263377	8.66728852936593e-06			N6AMT1	Acute lymphocytic leukaemia	Inverse variance weighted	1.38475162422079	0.115466687267801	16.6068422516945	0.797316373847986
BCKDK	Acute Lymphoblastic Leukemia	Simple mode	0.383440156523203	0.175154221606933	0.839410847684182	0.025410121883047			N6AMT1	Acute lymphocytic leukaemia	Simple mode	1.11183236075898	0.0250842675602573	49.2807372374486	0.961279053562271
BCKDK	Acute Lymphoblastic Leukemia	Weighted mode	0.464107497108891	0.26655576296058	0.808070200697683	0.0126958296037608			N6AMT1	Acute lymphocytic leukaemia	Weighted mode	0.854324243620312	0.0481028430750745	15.1731138240271	0.92437112048244
BCL10	Acute Lymphoblastic Leukemia	MR Egger	1.20078225760385	0.443195656437665	3.25336679011204	0.722583357827028			PDXK	Acute lymphocytic leukaemia	MR Egger	1.66593870238952	0.0466402422390578	59.5055177006587	0.793526422305207
BCL10	Acute Lymphoblastic Leukemia	Weighted median	1.36514532825392	0.770587075718919	2.41844410057727	0.286056350488944			PDXK	Acute lymphocytic leukaemia	Weighted median	0.78842583936679	0.196924544128304	3.15661669769422	0.736968701059445
BCL10	Acute Lymphoblastic Leukemia	Inverse variance weighted	1.60688851040985	1.05723330162337	2.44230926222471	0.0263803516296137			PDXK	Acute lymphocytic leukaemia	Inverse variance weighted	0.889404004858208	0.27226626278481	2.90538928975946	0.84613112985281
BCL10	Acute Lymphoblastic Leukemia	Simple mode	1.56403144565926	0.620084536274495	3.94493689152106	0.353650543924645			PDXK	Acute lymphocytic leukaemia	Simple mode	0.332784245226273	0.0425440366857998	2.60307583619079	0.342464112891621
BCL10	Acute Lymphoblastic Leukemia	Weighted mode	1.41499803279028	0.758927914864164	2.63822082912674	0.286592234161168			PDXK	Acute lymphocytic leukaemia	Weighted mode	1.03333899209643	0.230426609052188	4.63396773913827	0.967491121284204
BCL2L13	Acute Lymphoblastic Leukemia	MR Egger	0.612676166887556	0.295437996005285	1.27056130405553	0.203660178854634			REG4	Acute lymphocytic leukaemia	MR Egger	1.01109904398803	0.140975871030644	7.2517464817174	0.991507715257884
BCL2L13	Acute Lymphoblastic Leukemia	Weighted median	0.591628342522096	0.369629692330712	0.946958815641553	0.0287357279616808			REG4	Acute lymphocytic leukaemia	Weighted median	2.17911677029992	0.65520353848264	7.24744238958068	0.203940407721787
BCL2L13	Acute Lymphoblastic Leukemia	Inverse variance weighted	0.607352873161995	0.432516299197179	0.852863841716085	0.00399112545321676			REG4	Acute lymphocytic leukaemia	Inverse variance weighted	2.11408925173705	0.835102689705971	5.35188476746943	0.114165992445931
BCL2L13	Acute Lymphoblastic Leukemia	Simple mode	0.657615107747992	0.320503664518425	1.34930635064094	0.266536021569802			REG4	Acute lymphocytic leukaemia	Simple mode	1.19633728440289	0.18760581478229	7.62888346351822	0.853792285428506
BCL2L13	Acute Lymphoblastic Leukemia	Weighted mode	0.627958559491379	0.400028337537222	0.985760046066224	0.0567205435149002			REG4	Acute lymphocytic leukaemia	Weighted mode	2.53071772279391	0.517096491395253	12.3855649748893	0.281354898954139
BCO2	Acute Lymphoblastic Leukemia	MR Egger	0.262960596784496	0.00866713258746289	7.97821825886018	0.485736802432555			HSPB1	Acute lymphocytic leukaemia	MR Egger	1.14915722913004	0.403657380793871	3.27149310304866	0.802005510972211
BCO2	Acute Lymphoblastic Leukemia	Weighted median	2.61259976989166	0.704497883419528	9.68871265376572	0.150951640695607			HSPB1	Acute lymphocytic leukaemia	Weighted median	1.00926848696417	0.505216004713755	2.01621260861693	0.979152801784773
BCO2	Acute Lymphoblastic Leukemia	Inverse variance weighted	4.12070614290967	1.46817710005354	11.5655114874046	0.00715932067290378			HSPB1	Acute lymphocytic leukaemia	Inverse variance weighted	0.843086461026637	0.45976846183064	1.54598420678156	0.581128219836005
BCO2	Acute Lymphoblastic Leukemia	Simple mode	2.13211829046697	0.211710767425299	21.4723533423863	0.548846773174379			HSPB1	Acute lymphocytic leukaemia	Simple mode	0.954725485625765	0.255129111040148	3.57270383292292	0.946827223875206
BCO2	Acute Lymphoblastic Leukemia	Weighted mode	1.86031228633291	0.389432171334546	8.88668696995801	0.471755287355134			HSPB1	Acute lymphocytic leukaemia	Weighted mode	1.01618018971728	0.513925714937134	2.00928295269318	0.964324610960954
BECN1	Acute Lymphoblastic Leukemia	MR Egger	1.79453488587916	1.19025188516521	2.70560836472889	0.0136948237912175			CHI3L1	Acute lymphocytic leukaemia	MR Egger	0.685252550126206	0.241415623223814	1.9450731944516	0.497819739026123
BECN1	Acute Lymphoblastic Leukemia	Weighted median	2.07919624582879	1.37001596432483	3.15547930917651	0.000583486214151909			CHI3L1	Acute lymphocytic leukaemia	Weighted median	1.06039082762464	0.547685390682663	2.05305587192844	0.861902081667788
BECN1	Acute Lymphoblastic Leukemia	Inverse variance weighted	1.76912812169976	1.29002334437367	2.42616873922425	0.00039951152483833			CHI3L1	Acute lymphocytic leukaemia	Inverse variance weighted	1.36114794619213	0.798297873038772	2.32084262528539	0.25740888493324
BECN1	Acute Lymphoblastic Leukemia	Simple mode	1.99581082264003	0.929207979875813	4.28672689649031	0.0954762579629567			CHI3L1	Acute lymphocytic leukaemia	Simple mode	1.41144093044641	0.542137308162196	3.67465118180615	0.498114398198449
BECN1	Acute Lymphoblastic Leukemia	Weighted mode	1.89417909210051	1.33363548309393	2.69032616365832	0.00256561225698088			CHI3L1	Acute lymphocytic leukaemia	Weighted mode	1.1539863347607	0.560852094190169	2.37439509383896	0.706275654398635
BEGAIN	Acute Lymphoblastic Leukemia	MR Egger	0.763276608711758	0.537537905417068	1.08381413763648	0.138338462488627			SVEP1	Acute lymphocytic leukaemia	MR Egger	1.02711896442451	0.662103867370918	1.59336536013536	0.906249333196814
BEGAIN	Acute Lymphoblastic Leukemia	Weighted median	0.721300996199467	0.529788134591064	0.982043751357204	0.0379782953695299			SVEP1	Acute lymphocytic leukaemia	Weighted median	0.89871905463813	0.558711914018328	1.44563936960034	0.659708333991513
BEGAIN	Acute Lymphoblastic Leukemia	Inverse variance weighted	0.739923743100571	0.592931642817594	0.923356262456016	0.00768275060321537			SVEP1	Acute lymphocytic leukaemia	Inverse variance weighted	0.907498704478016	0.646843827184125	1.27318815457267	0.574201102688449
BEGAIN	Acute Lymphoblastic Leukemia	Simple mode	0.910378281647675	0.530330084914594	1.56277880375058	0.735042918156164			SVEP1	Acute lymphocytic leukaemia	Simple mode	0.808666619402476	0.367615580036329	1.7788737388965	0.603617099723221
BEGAIN	Acute Lymphoblastic Leukemia	Weighted mode	0.72198966137898	0.542906086000453	0.960145934222774	0.0302179586918868			SVEP1	Acute lymphocytic leukaemia	Weighted mode	0.952232098093389	0.61472782339775	1.47503648627377	0.828819964153336
BIK	Acute Lymphoblastic Leukemia	MR Egger	0.741245154006289	0.0987229343113333	5.5655191184358	0.776387061130337			TMEM119	Acute lymphocytic leukaemia	MR Egger	0.0174068526514154	4.62917637224724e-06	65.4540883437963	0.511512914761353
BIK	Acute Lymphoblastic Leukemia	Weighted median	3.38557338224658	1.06586119051987	10.753846024721	0.038624165069047			TMEM119	Acute lymphocytic leukaemia	Weighted median	1.02150321359011	0.153599025549873	6.79345986499188	0.982441017476889
BIK	Acute Lymphoblastic Leukemia	Inverse variance weighted	6.10413771278655	2.66779175527862	13.9667937510256	1.83921655479177e-05			TMEM119	Acute lymphocytic leukaemia	Inverse variance weighted	1.64196773091037	0.302273111145768	8.91927839407056	0.565742538251369
BIK	Acute Lymphoblastic Leukemia	Simple mode	2.01970648970259	0.195193940460111	20.8982630041242	0.566378018645869			TMEM119	Acute lymphocytic leukaemia	Simple mode	0.961530387584425	0.10150540997282	9.10828976008094	0.975826123307526
BIK	Acute Lymphoblastic Leukemia	Weighted mode	2.27570705086412	0.544255594798837	9.51546043962459	0.281952479023629			TMEM119	Acute lymphocytic leukaemia	Weighted mode	0.995862058206401	0.138769499371897	7.14668023927406	0.997084034613313
BMP1	Acute Lymphoblastic Leukemia	MR Egger	2.86402062734989	0.761498191962604	10.7716790932164	0.150559376528717			C11orf87	Acute lymphocytic leukaemia	MR Egger	3.55054070552908	0.947108757123338	13.3103397121026	0.0969950918700065
BMP1	Acute Lymphoblastic Leukemia	Weighted median	2.06435913237413	0.945231848379297	4.50850088761123	0.0689613755445598			C11orf87	Acute lymphocytic leukaemia	Weighted median	1.06574324742387	0.438866116812807	2.58805277034874	0.888138774145307
BMP1	Acute Lymphoblastic Leukemia	Inverse variance weighted	1.81102639636422	1.01938266285869	3.21745378632425	0.0428189203019936			C11orf87	Acute lymphocytic leukaemia	Inverse variance weighted	1.00108267473259	0.509609017428035	1.9665400088633	0.997493716879815
BMP1	Acute Lymphoblastic Leukemia	Simple mode	2.72731423988184	0.761644928820919	9.76602440533174	0.151422296453777			C11orf87	Acute lymphocytic leukaemia	Simple mode	1.02675379206471	0.263234361952127	4.0048850070379	0.970502438043006
BMP1	Acute Lymphoblastic Leukemia	Weighted mode	2.20471308096894	0.826641562861555	5.8801298988273	0.14250093396201			C11orf87	Acute lymphocytic leukaemia	Weighted mode	1.19555368438727	0.470434079975382	3.03836	0.716107262906491
BMP8A	Acute Lymphoblastic Leukemia	MR Egger	1.56492680938643	0.89386920907277	2.73976986104801	0.155671034443356			SPATA20	Acute lymphocytic leukaemia	MR Egger	1.20060214494031	0.425716184845954	3.3859307250836	0.74369975316547
BMP8A	Acute Lymphoblastic Leukemia	Weighted median	1.49344178031883	1.04352686431754	2.13733678304539	0.0283108057236929			SPATA20	Acute lymphocytic leukaemia	Weighted median	1.22944862273704	0.657539379163601	2.29878842826527	0.517667380680212
BMP8A	Acute Lymphoblastic Leukemia	Inverse variance weighted	1.50183674154658	1.13903831338894	1.98019115928464	0.00394144540028696			SPATA20	Acute lymphocytic leukaemia	Inverse variance weighted	1.15624709654925	0.646422020193087	2.06816492402166	0.624589667005281
BMP8A	Acute Lymphoblastic Leukemia	Simple mode	1.99143326794118	1.16008179896077	3.41855760879583	0.0339395657997939			SPATA20	Acute lymphocytic leukaemia	Simple mode	1.11329313057519	0.256889072350709	4.8247345955371	0.890635400681034
BMP8A	Acute Lymphoblastic Leukemia	Weighted mode	1.41440716313573	0.969511293495413	2.06345984471933	0.105505563357974			SPATA20	Acute lymphocytic leukaemia	Weighted mode	1.24225453011132	0.661799321880569	2.33181912788448	0.524708985423709
BMPR2	Acute Lymphoblastic Leukemia	MR Egger	0.701624952340093	0.298283389937665	1.65037	0.427406665111136			RAB17	Acute lymphocytic leukaemia	MR Egger	1.41914309054112	0.396364403068798	5.08109985618724	0.60730225551321
BMPR2	Acute Lymphoblastic Leukemia	Weighted median	0.77817669675114	0.461435408804432	1.31233745788063	0.34690708026808			RAB17	Acute lymphocytic leukaemia	Weighted median	1.01938529458936	0.551272684565898	1.88499522635213	0.951186463423913
BMPR2	Acute Lymphoblastic Leukemia	Inverse variance weighted	0.650585898813139	0.446664476790913	0.947606164643873	0.0250595949486589			RAB17	Acute lymphocytic leukaemia	Inverse variance weighted	0.977126397562268	0.526486735437506	1.81348537873344	0.941535253052193
BMPR2	Acute Lymphoblastic Leukemia	Simple mode	0.626156588955635	0.302618475902479	1.29559860059206	0.222246279372777			RAB17	Acute lymphocytic leukaemia	Simple mode	0.911608228765494	0.283321384343673	2.93316921586445	0.880496958182377
BMPR2	Acute Lymphoblastic Leukemia	Weighted mode	0.650393746578059	0.371773309715558	1.13782247012699	0.148124508731415			RAB17	Acute lymphocytic leukaemia	Weighted mode	0.99774046469691	0.525524727529184	1.89427058851065	0.994651371154924
BNIPL	Acute Lymphoblastic Leukemia	MR Egger	1.15055713891821	0.633424454712442	2.08988099538504	0.649104414426554			NAT14	Acute lymphocytic leukaemia	MR Egger	0.026251662038848	8.2088071878769e-05	8.39524846946896	0.432811712803709
BNIPL	Acute Lymphoblastic Leukemia	Weighted median	0.701623133703297	0.420746794639275	1.17000302324272	0.174395786345732			NAT14	Acute lymphocytic leukaemia	Weighted median	2.9061473360131	0.789172478863197	10.7019600465313	0.108712162800124
BNIPL	Acute Lymphoblastic Leukemia	Inverse variance weighted	0.687613602200742	0.489119460417311	0.966660507696998	0.0311529741842635			NAT14	Acute lymphocytic leukaemia	Inverse variance weighted	2.93484829599876	0.629927383472612	13.6735356273035	0.170265266354055
BNIPL	Acute Lymphoblastic Leukemia	Simple mode	1.08628123270423	0.469584012896206	2.51287710850207	0.848138063689846			NAT14	Acute lymphocytic leukaemia	Simple mode	9.47634816129212	0.939383522162863	95.5958587257991	0.196773440595719
BNIPL	Acute Lymphoblastic Leukemia	Weighted mode	0.827967149552473	0.487093982360869	1.40738671706719	0.491707187711263			NAT14	Acute lymphocytic leukaemia	Weighted mode	1.59407748171548	0.33929092519874	7.48939281598508	0.614577480140452
BRIP1	Acute Lymphoblastic Leukemia	MR Egger	0.129906539854818	9.82768849675154e-06	1717.15954393849	0.746023834472996			TMEM132C	Acute lymphocytic leukaemia	MR Egger	0.524980709847845	0.00347738411456218	79.2563423057586	0.824746270329607
BRIP1	Acute Lymphoblastic Leukemia	Weighted median	17.7827993339553	1.94054836767994	162.958036717113	0.0108785042584877			TMEM132C	Acute lymphocytic leukaemia	Weighted median	1.10104811698823	0.105407902420069	11.5011012276108	0.935904982380189
BRIP1	Acute Lymphoblastic Leukemia	Inverse variance weighted	15.9123039628893	1.92985903943117	131.202026797777	0.01014605066226			TMEM132C	Acute lymphocytic leukaemia	Inverse variance weighted	0.878079352266281	0.124965424655491	6.16989340053021	0.89600852760846
BRIP1	Acute Lymphoblastic Leukemia	Simple mode	35.7172156655707	2.07515733801285	614.757961496312	0.132802000961675			TMEM132C	Acute lymphocytic leukaemia	Simple mode	1.02062625603575	0.0453650645031334	22.9621177864213	0.990552213013278
BRIP1	Acute Lymphoblastic Leukemia	Weighted mode	23.592263160963	2.08931684651167	266.400417909532	0.125021365863528			TMEM132C	Acute lymphocytic leukaemia	Weighted mode	0.9926900440945	0.0588084282675427	16.7566716655173	0.996259605816962
BRWD1	Acute Lymphoblastic Leukemia	MR Egger	1.24839401303037	0.496519226715024	3.13882630906568	0.645648261707862			BMP15	Acute lymphocytic leukaemia	MR Egger	0.748781628199343	0.0401080071091384	13.9791021080455	0.85582232969651
BRWD1	Acute Lymphoblastic Leukemia	Weighted median	1.41509759736652	0.628089049596389	3.1882441054486	0.402151525217247			BMP15	Acute lymphocytic leukaemia	Weighted median	1.31111249826885	0.395546376856664	4.3459277690204	0.657740345639832
BRWD1	Acute Lymphoblastic Leukemia	Inverse variance weighted	1.95707416219508	1.10485753979708	3.46663632040291	0.0213439463898917			BMP15	Acute lymphocytic leukaemia	Inverse variance weighted	1.34892513130256	0.478359141146015	3.80383451124268	0.571478539581865
BRWD1	Acute Lymphoblastic Leukemia	Simple mode	1.48205354794251	0.399111932128819	5.50342533547715	0.566757074609355			BMP15	Acute lymphocytic leukaemia	Simple mode	1.73360812087833	0.196153620349567	15.3216499976873	0.641653415003611
BRWD1	Acute Lymphoblastic Leukemia	Weighted mode	1.40276154421632	0.590620369477674	3.33164931590892	0.456869273964959			BMP15	Acute lymphocytic leukaemia	Weighted mode	1.14719067776153	0.32504576068695	4.04880361571744	0.839432054996845
BST1	Acute Lymphoblastic Leukemia	MR Egger	0.746938290441116	0.550611542092873	1.01326755266781	0.0657901599619815			CACNB4	Acute lymphocytic leukaemia	MR Egger	21.7101369640579	0.000837932834335475	562491.440464848	0.658959089861577
BST1	Acute Lymphoblastic Leukemia	Weighted median	0.736601872444687	0.551298329855159	0.984190027623648	0.0386595633389177			CACNB4	Acute lymphocytic leukaemia	Weighted median	0.7829405947429	0.160097243317295	3.82889775110915	0.76253113770629
BST1	Acute Lymphoblastic Leukemia	Inverse variance weighted	0.707159401538586	0.581328484091844	0.860226933427546	0.000528163996272078			CACNB4	Acute lymphocytic leukaemia	Inverse variance weighted	0.737565965765976	0.193756181541991	2.80767069998435	0.655364470442174
BST1	Acute Lymphoblastic Leukemia	Simple mode	0.647016602163738	0.38917766008025	1.07567963533463	0.0984969920160612			CACNB4	Acute lymphocytic leukaemia	Simple mode	1.61563268842737	0.181039677290266	14.4182149625132	0.70935010063722
BST1	Acute Lymphoblastic Leukemia	Weighted mode	0.683531717921757	0.531501359430647	0.879048757101125	0.00436978744366432			CACNB4	Acute lymphocytic leukaemia	Weighted mode	1.41568477577807	0.219719334546423	9.12147029985824	0.749640256649381
BTBD1	Acute Lymphoblastic Leukemia	MR Egger	1.10316554583075	0.147875710158883	8.22971007341569	0.925601424781316			MTRF1L	Acute lymphocytic leukaemia	MR Egger	0.231006612322329	0.0291594410614077	1.83007811515516	0.397531554340196
BTBD1	Acute Lymphoblastic Leukemia	Weighted median	1.79538429624619	0.598401136323465	5.38669560524534	0.29649675906336			MTRF1L	Acute lymphocytic leukaemia	Weighted median	0.651454902384002	0.215162745147529	1.97243016930816	0.448326857976073
BTBD1	Acute Lymphoblastic Leukemia	Inverse variance weighted	2.53882197849022	1.09688613298725	5.87628637524216	0.0295571155631805			MTRF1L	Acute lymphocytic leukaemia	Inverse variance weighted	0.814994477263303	0.224500622500697	2.95863766688497	0.75580549313616
BTBD1	Acute Lymphoblastic Leukemia	Simple mode	5.63144778179734	1.10979133958484	28.5758259124402	0.0610922259987316			MTRF1L	Acute lymphocytic leukaemia	Simple mode	0.775862409214157	0.104919761876283	5.73736031484138	0.826862738275895
BTBD1	Acute Lymphoblastic Leukemia	Weighted mode	1.48674707523814	0.370470047860467	5.96651977263678	0.587102493578729			MTRF1L	Acute lymphocytic leukaemia	Weighted mode	0.596219866468597	0.180048797772301	1.97434325344059	0.486401038753549
BTBD17	Acute Lymphoblastic Leukemia	MR Egger	0.438451322465802	0.0661945309012363	2.90416080535167	0.420977669820822			CSF2RB	Acute lymphocytic leukaemia	MR Egger	0.787750113589664	0.03687277744044	16.8294954851962	0.892629923807771
BTBD17	Acute Lymphoblastic Leukemia	Weighted median	0.326908689629461	0.156536385320731	0.682712144759727	0.00292135801695209			CSF2RB	Acute lymphocytic leukaemia	Weighted median	1.16077574942133	0.408350656705752	3.29961595094377	0.779703255822785
BTBD17	Acute Lymphoblastic Leukemia	Inverse variance weighted	0.388863595801832	0.170104521303406	0.888952833124385	0.0251533807492575			CSF2RB	Acute lymphocytic leukaemia	Inverse variance weighted	1.43431975344149	0.559357540281195	3.67792155635951	0.452800122230212
BTBD17	Acute Lymphoblastic Leukemia	Simple mode	0.227722941053212	0.0384881284597878	1.34736969442683	0.141475653045315			CSF2RB	Acute lymphocytic leukaemia	Simple mode	1.03541296294142	0.180443144822417	5.94137	0.971311067791767
BTBD17	Acute Lymphoblastic Leukemia	Weighted mode	0.322954904386577	0.148820468240315	0.700843583551423	0.0211754438624737			CSF2RB	Acute lymphocytic leukaemia	Weighted mode	1.03541296294142	0.316555964012074	3.38669974888309	0.957720399723724
BTG2	Acute Lymphoblastic Leukemia	MR Egger	0.636891351126041	0.314321099560188	1.29049749987109	0.222571729963747			COL1A1	Acute lymphocytic leukaemia	MR Egger	0.823781110811383	0.338958164733464	2.00206216912715	0.674836335202122
BTG2	Acute Lymphoblastic Leukemia	Weighted median	0.501879521775067	0.318096395511694	0.791845044241975	0.00304504911826637			COL1A1	Acute lymphocytic leukaemia	Weighted median	0.746326801136166	0.348864663383921	1.59661826649714	0.450787489065957
BTG2	Acute Lymphoblastic Leukemia	Inverse variance weighted	0.476208739574935	0.342475163185482	0.662164115897446	1.02888052815196e-05			COL1A1	Acute lymphocytic leukaemia	Inverse variance weighted	0.665658077946325	0.392110250000561	1.13004104517687	0.131750205003245
BTG2	Acute Lymphoblastic Leukemia	Simple mode	0.422169744451041	0.190065882780596	0.937713231446149	0.0442969045318489			COL1A1	Acute lymphocytic leukaemia	Simple mode	0.457302533298956	0.14360030941889	1.45630331722762	0.2041303603148
BTG2	Acute Lymphoblastic Leukemia	Weighted mode	0.492687653634713	0.319293003966936	0.760245670992578	0.00372874062860734			COL1A1	Acute lymphocytic leukaemia	Weighted mode	0.755715912448167	0.330348646469377	1.72879939552078	0.516518726131681
BTN2A1	Acute Lymphoblastic Leukemia	MR Egger	0.592172330855431	0.388176159083821	0.903373536021394	0.020809555563386			ANGPTL1	Acute lymphocytic leukaemia	MR Egger	1.42795532588236	0.485243887063173	4.20212694498163	0.538318332574875
BTN2A1	Acute Lymphoblastic Leukemia	Weighted median	0.600570897746429	0.412846488906953	0.873655009577282	0.00766839526029007			ANGPTL1	Acute lymphocytic leukaemia	Weighted median	1.47221892218386	0.701085417075551	3.09153278908187	0.306874920947129
BTN2A1	Acute Lymphoblastic Leukemia	Inverse variance weighted	0.620301872309833	0.480463225172187	0.80084050689455	0.000248280485020242			ANGPTL1	Acute lymphocytic leukaemia	Inverse variance weighted	1.38599491392907	0.701785559896322	2.73727761186914	0.347167178582343
BTN2A1	Acute Lymphoblastic Leukemia	Simple mode	0.458090219589181	0.241171482385392	0.870113859266033	0.0229764559022566			ANGPTL1	Acute lymphocytic leukaemia	Simple mode	2.05680300279133	0.441582458405456	9.58017808852159	0.385114413834127
BTN2A1	Acute Lymphoblastic Leukemia	Weighted mode	0.605517108647527	0.419774350914852	0.873447765604986	0.0112897865999759			ANGPTL1	Acute lymphocytic leukaemia	Weighted mode	1.49316843792134	0.689373249713378	3.23417246742813	0.339063547348091
BTN3A1	Acute Lymphoblastic Leukemia	MR Egger	0.691327268390774	0.429452294393643	1.11289053117171	0.139423011646095			OLFM3	Acute lymphocytic leukaemia	MR Egger	0.0481339598220802	8.56680736928046e-05	27.0448253156909	0.446781357391852
BTN3A1	Acute Lymphoblastic Leukemia	Weighted median	0.626012335995578	0.426787890121758	0.918234687274839	0.0165552348861399			OLFM3	Acute lymphocytic leukaemia	Weighted median	1.10991368398778	0.216284212076665	5.69578506944675	0.900541612826703
BTN3A1	Acute Lymphoblastic Leukemia	Inverse variance weighted	0.643414165474106	0.488790814690574	0.846950834366249	0.00166337442767869			OLFM3	Acute lymphocytic leukaemia	Inverse variance weighted	1.08541532802584	0.213088719880651	5.52880713241557	0.921394819142022
BTN3A1	Acute Lymphoblastic Leukemia	Simple mode	0.558295554192215	0.303894685444197	1.02566428687358	0.0700847110106583			OLFM3	Acute lymphocytic leukaemia	Simple mode	1.84617752262807	0.114807162452184	29.6877944917128	0.694491344851945
BTN3A1	Acute Lymphoblastic Leukemia	Weighted mode	0.621537126722429	0.423122209671397	0.912994853648514	0.02159097632486			OLFM3	Acute lymphocytic leukaemia	Weighted mode	1.05471758840573	0.159493608753165	6.97475717045196	0.959394881414092
BTNL3	Acute Lymphoblastic Leukemia	MR Egger	0.899603808394818	0.725171334819372	1.11599421160248	0.341657224248769			KIAA1549L	Acute lymphocytic leukaemia	MR Egger	2.59988881540285	0.67573752748486	10.0030286576148	0.236924825895938
BTNL3	Acute Lymphoblastic Leukemia	Weighted median	0.926679770982201	0.740296474960383	1.15998850054443	0.506284256740707			KIAA1549L	Acute lymphocytic leukaemia	Weighted median	1.23810588934592	0.593841415150727	2.58133931740676	0.568836060108309
BTNL3	Acute Lymphoblastic Leukemia	Inverse variance weighted	0.811507726985666	0.698604602998141	0.942657388931052	0.00628362795761923			KIAA1549L	Acute lymphocytic leukaemia	Inverse variance weighted	0.907765869996225	0.441983825280931	1.86440957246848	0.79214124771818
BTNL3	Acute Lymphoblastic Leukemia	Simple mode	0.91897482558611	0.639217146387389	1.32117033285777	0.650584669848129			KIAA1549L	Acute lymphocytic leukaemia	Simple mode	1.28214894679707	0.322241561266188	5.10147081994458	0.738664776145706
BTNL3	Acute Lymphoblastic Leukemia	Weighted mode	0.91897482558611	0.755249264828332	1.11819338248939	0.403419448134925			KIAA1549L	Acute lymphocytic leukaemia	Weighted mode	1.33081567926397	0.583890181367079	3.03322513152757	0.526745934701463
BTNL8	Acute Lymphoblastic Leukemia	MR Egger	1.02444335933661	0.662934722201057	1.58308829111322	0.914383412125288			TLR1	Acute lymphocytic leukaemia	MR Egger	0.0850512003042118	5.43458511290447e-05	133.105039720708	0.558255484297578
BTNL8	Acute Lymphoblastic Leukemia	Weighted median	1.26958458005559	0.88886968824752	1.81336480164243	0.189414842283672			TLR1	Acute lymphocytic leukaemia	Weighted median	1.06407335691616	0.160586727556623	7.05072035607417	0.94867596056456
BTNL8	Acute Lymphoblastic Leukemia	Inverse variance weighted	1.36390137994892	1.03965623068829	1.78927122188747	0.0250392978943902			TLR1	Acute lymphocytic leukaemia	Inverse variance weighted	1.3862323046144	0.295002248832576	6.51398424914095	0.679107158955069
BTNL8	Acute Lymphoblastic Leukemia	Simple mode	1.10800234453355	0.575870846717289	2.13184814353789	0.761485288065235			TLR1	Acute lymphocytic leukaemia	Simple mode	0.920302755953262	0.0765693620773383	11.0613062409963	0.950943846013301
BTNL8	Acute Lymphoblastic Leukemia	Weighted mode	1.29287691478992	0.944519689235888	1.76971505818894	0.122435741317825			TLR1	Acute lymphocytic leukaemia	Weighted mode	0.98564928591683	0.10722833628949	9.06014723762505	0.990421820269692
BYSL	Acute Lymphoblastic Leukemia	MR Egger	1.08202578540858	0.454774088787032	2.57442063907322	0.860623367018653			KLK13	Acute lymphocytic leukaemia	MR Egger	1.16353400949836	0.555802215199094	2.43577904916121	0.695514423472184
BYSL	Acute Lymphoblastic Leukemia	Weighted median	1.64510949999489	0.942208010968444	2.87238617743409	0.0800058853641079			KLK13	Acute lymphocytic leukaemia	Weighted median	1.10732570924388	0.705888236833313	1.73706000804488	0.657189598158222
BYSL	Acute Lymphoblastic Leukemia	Inverse variance weighted	1.98271016086723	1.31350080766187	2.99287184223656	0.00112192496156786			KLK13	Acute lymphocytic leukaemia	Inverse variance weighted	0.927109031315793	0.562681303327414	1.52756302877752	0.766418224369811
BYSL	Acute Lymphoblastic Leukemia	Simple mode	2.32747419812866	0.962724486293791	5.62688102367591	0.0770179478541787			KLK13	Acute lymphocytic leukaemia	Simple mode	1.62088250014207	0.29508419293688	8.90342533471049	0.588624074363595
BYSL	Acute Lymphoblastic Leukemia	Weighted mode	1.65752398150221	0.971925415990918	2.82674545191707	0.0799848133038755			KLK13	Acute lymphocytic leukaemia	Weighted mode	1.15349681691452	0.719887697765469	1.8482812121418	0.563765033040231
C10orf116	Acute Lymphoblastic Leukemia	MR Egger	10.9045067381193	0.039589257547099	3003.54880513294	0.492261949836334			NFE2L1	Acute lymphocytic leukaemia	MR Egger	26746.8436156335	0.00109244180349317	654857440562.622	0.449049762020813
C10orf116	Acute Lymphoblastic Leukemia	Weighted median	0.297881751637998	0.0752239291748666	1.17959190555775	0.0845689830049419			NFE2L1	Acute lymphocytic leukaemia	Weighted median	1.17485576570297	0.130127645025367	10.6071701361877	0.88586310435992
C10orf116	Acute Lymphoblastic Leukemia	Inverse variance weighted	0.239127074790363	0.0757693664465453	0.754681747776488	0.0146874236011984			NFE2L1	Acute lymphocytic leukaemia	Inverse variance weighted	0.76785352424901	0.112073025191997	5.26084696733721	0.787901801645603
C10orf116	Acute Lymphoblastic Leukemia	Simple mode	0.590903444130318	0.0836581090787253	4.17373622390261	0.634387821505407			NFE2L1	Acute lymphocytic leukaemia	Simple mode	1.39451616952479	0.0865308277482999	22.4737864836189	0.83643428020773
C10orf116	Acute Lymphoblastic Leukemia	Weighted mode	0.287722244218159	0.0578671354666666	1.43058904074525	0.225276272075093			NFE2L1	Acute lymphocytic leukaemia	Weighted mode	1.37446384814087	0.10137653241262	18.6349919935813	0.833276621318898
C11orf1	Acute Lymphoblastic Leukemia	MR Egger	0.179506223939688	0.00671214184062752	4.80062626776565	0.381046323750566			COL6A5	Acute lymphocytic leukaemia	MR Egger	0.316086675963889	1.21998408035797e-05	8189.51561175982	0.860844256505864
C11orf1	Acute Lymphoblastic Leukemia	Weighted median	4.22534081069736	0.975939935650688	18.293651396324	0.0539264428977072			COL6A5	Acute lymphocytic leukaemia	Weighted median	1.08614449152804	0.104368882817743	11.3032718625226	0.944876275633926
C11orf1	Acute Lymphoblastic Leukemia	Inverse variance weighted	6.16817331497226	1.45793814533784	26.0960056263015	0.0134237835413701			COL6A5	Acute lymphocytic leukaemia	Inverse variance weighted	0.975975475681934	0.113790524740321	8.3708914367547	0.982305717550501
C11orf1	Acute Lymphoblastic Leukemia	Simple mode	1.99896642032641	0.143829977959033	27.7818769514844	0.633170622618712			COL6A5	Acute lymphocytic leukaemia	Simple mode	1.09818735158974	0.0627902934773112	19.207036508397	0.954684998785229
C11orf1	Acute Lymphoblastic Leukemia	Weighted mode	2.25917467212498	0.417951998134307	12.211618133073	0.397411668037265			COL6A5	Acute lymphocytic leukaemia	Weighted mode	1.0940246251369	0.0638691684687643	18.7397129021849	0.956200598602102
C11orf80	Acute Lymphoblastic Leukemia	MR Egger	2.02715680782329	0.798586132167937	5.14580025619596	0.155385064294773			RNF122	Acute lymphocytic leukaemia	MR Egger	29.6996290475708	0.691190576990484	1276.15739410674	0.175307601975191
C11orf80	Acute Lymphoblastic Leukemia	Weighted median	2.09066003186947	1.02597932188379	4.26018271092558	0.0422936016193678			RNF122	Acute lymphocytic leukaemia	Weighted median	1.67005984948794	0.331065063883207	8.4246276793966	0.534501902858794
C11orf80	Acute Lymphoblastic Leukemia	Inverse variance weighted	1.65081687110275	1.00045189522345	2.72396539496662	0.0497894851436205			RNF122	Acute lymphocytic leukaemia	Inverse variance weighted	1.52144817413615	0.367391986528119	6.30063972939987	0.562690613202217
C11orf80	Acute Lymphoblastic Leukemia	Simple mode	2.00617645035917	0.559289296482024	7.19617553078822	0.299485728708644			RNF122	Acute lymphocytic leukaemia	Simple mode	0.710177561610605	0.0348151662644044	14.486564998279	0.834860070682608
C11orf80	Acute Lymphoblastic Leukemia	Weighted mode	2.03415724869743	0.82669124092155	5.00524924857762	0.13957655017526			RNF122	Acute lymphocytic leukaemia	Weighted mode	3.66589730924247	0.601199576529451	22.3533142845666	0.231797185975507
C12orf43	Acute Lymphoblastic Leukemia	MR Egger	3.30589458279493	1.64771595748092	6.6327809371109	0.00204936779753384			FAM162B	Acute lymphocytic leukaemia	MR Egger	0.0314874991064078	1.37827115356568e-05	71.9352354876651	0.541874835042862
C12orf43	Acute Lymphoblastic Leukemia	Weighted median	1.92860705943324	1.19539875886352	3.11153509414041	0.00711624059260979			FAM162B	Acute lymphocytic leukaemia	Weighted median	13.234715702397	0.797759334967352	219.562081000836	0.0714933058671134
C12orf43	Acute Lymphoblastic Leukemia	Inverse variance weighted	1.95950737389841	1.37629957385127	2.78984984178828	0.000190002309476966			FAM162B	Acute lymphocytic leukaemia	Inverse variance weighted	7.34969202945153	0.642470956020582	84.0784667720493	0.108674733200952
C12orf43	Acute Lymphoblastic Leukemia	Simple mode	1.23788769222603	0.520199910407169	2.94572511049698	0.632756189666259			FAM162B	Acute lymphocytic leukaemia	Simple mode	21.3819441261986	0.68632208026545	666.141375546381	0.223019543590716
C12orf43	Acute Lymphoblastic Leukemia	Weighted mode	1.89701567518145	1.20234591350349	2.99303921730649	0.00967233369344557			FAM162B	Acute lymphocytic leukaemia	Weighted mode	19.5356780490256	0.588027793837094	649.021561285097	0.238225270883958
C12orf76	Acute Lymphoblastic Leukemia	MR Egger	0.397002920561913	0.0907496116061188	1.73677127808294	0.243396858687971			MTMR1	Acute lymphocytic leukaemia	MR Egger	1.19921132094595	0.190618079029781	7.54444593925555	0.852875775684473
C12orf76	Acute Lymphoblastic Leukemia	Weighted median	0.428696922900189	0.16216211269903	1.13331683119586	0.0876952401892896			MTMR1	Acute lymphocytic leukaemia	Weighted median	0.942484239703127	0.399469345272263	2.22364131966964	0.892408199846941
C12orf76	Acute Lymphoblastic Leukemia	Inverse variance weighted	0.399607591883578	0.172202169339352	0.927318326497413	0.0327046760138289			MTMR1	Acute lymphocytic leukaemia	Inverse variance weighted	0.860070999233043	0.389265347775929	1.90030303993955	0.709379480067318
C12orf76	Acute Lymphoblastic Leukemia	Simple mode	0.56601839464566	0.106551655378944	3.00677471352134	0.515842864995324			MTMR1	Acute lymphocytic leukaemia	Simple mode	0.24253541543464	0.0337798988766458	1.74137370732989	0.201815760944295
C12orf76	Acute Lymphoblastic Leukemia	Weighted mode	0.407948565935878	0.118830440685079	1.4005000022695	0.177788732401783			MTMR1	Acute lymphocytic leukaemia	Weighted mode	1.03928315621798	0.382270425948757	2.8255114847498	0.94192226369401
C14orf159	Acute Lymphoblastic Leukemia	MR Egger	1.40047757830811	1.03118188601317	1.90202860809241	0.0379879788780424			MEGF10	Acute lymphocytic leukaemia	MR Egger	0.614914659309513	0.0307609420651855	12.2922125542339	0.771195835214653
C14orf159	Acute Lymphoblastic Leukemia	Weighted median	1.27013945235494	0.939739299158906	1.71670401554178	0.119789049499434			MEGF10	Acute lymphocytic leukaemia	Weighted median	1.16774817707249	0.360147649572973	3.78632432190794	0.796104291345622
C14orf159	Acute Lymphoblastic Leukemia	Inverse variance weighted	1.29550875552557	1.05552957226169	1.59004823715854	0.0132472995871196			MEGF10	Acute lymphocytic leukaemia	Inverse variance weighted	1.17702387931478	0.410176753114141	3.37753225154546	0.761854197766159
C14orf159	Acute Lymphoblastic Leukemia	Simple mode	0.889748998512648	0.531355522285071	1.48987494653257	0.659597893060328			MEGF10	Acute lymphocytic leukaemia	Simple mode	1.0204961983144	0.151145729610396	6.89012182784501	0.984384696192693
C14orf159	Acute Lymphoblastic Leukemia	Weighted mode	1.20370438889797	0.891856259293124	1.62459391942892	0.233447313751899			MEGF10	Acute lymphocytic leukaemia	Weighted mode	1.13008264968877	0.331873166811264	3.84811706049698	0.854444190003714
C16orf93	Acute Lymphoblastic Leukemia	MR Egger	0.302606483664795	0.0424432451595125	2.15748545173269	0.278000355538622			MILR1	Acute lymphocytic leukaemia	MR Egger	0.00586135708351281	1.99344594670593e-06	17.2342304626903	0.296356735854267
C16orf93	Acute Lymphoblastic Leukemia	Weighted median	0.237117396596547	0.0855945576396419	0.656871900728004	0.00563295743536809			MILR1	Acute lymphocytic leukaemia	Weighted median	2.31777828445895	0.400167466008125	13.4246	0.348240194096876
C16orf93	Acute Lymphoblastic Leukemia	Inverse variance weighted	0.272050708292566	0.117732708391956	0.628640833064735	0.00231705484145971			MILR1	Acute lymphocytic leukaemia	Inverse variance weighted	2.50248519307996	0.524303331040669	11.9442921126486	0.250021967871151
C16orf93	Acute Lymphoblastic Leukemia	Simple mode	0.208366482977063	0.0525440523235544	0.826289357373524	0.0608388681821219			MILR1	Acute lymphocytic leukaemia	Simple mode	14.5009858031468	0.514692154926033	408.552155401095	0.191490706811322
C16orf93	Acute Lymphoblastic Leukemia	Weighted mode	0.233842894691848	0.0807202079383123	0.677432588375543	0.0316478436219929			MILR1	Acute lymphocytic leukaemia	Weighted mode	14.5009858031468	1.28321659234228	163.868352792446	0.0967193148356135
C17orf99	Acute Lymphoblastic Leukemia	MR Egger	1.20072593783343	0.0928356599129631	15.5300536360452	0.893195187114931			THSD7A	Acute lymphocytic leukaemia	MR Egger	0.510749436325729	0.0809242185525971	3.22357127906647	0.526349148282911
C17orf99	Acute Lymphoblastic Leukemia	Weighted median	0.373394189715988	0.150241723348248	0.927992689424145	0.0339309609906832			THSD7A	Acute lymphocytic leukaemia	Weighted median	0.422032929127848	0.134783702846112	1.32146386771692	0.138511871249344
C17orf99	Acute Lymphoblastic Leukemia	Inverse variance weighted	0.311137904618532	0.149482289128018	0.64761381602542	0.00179852419397565			THSD7A	Acute lymphocytic leukaemia	Inverse variance weighted	0.411977595137347	0.156618481798297	1.08368780584743	0.0723156731800446
C17orf99	Acute Lymphoblastic Leukemia	Simple mode	0.138481661736851	0.0361340386960232	0.530723144421444	0.0235095325573238			THSD7A	Acute lymphocytic leukaemia	Simple mode	0.118163923451041	0.0179363115722898	0.77846065223994	0.0905752582147626
C17orf99	Acute Lymphoblastic Leukemia	Weighted mode	0.391647243778414	0.129471520581469	1.18472049196882	0.140904248703909			THSD7A	Acute lymphocytic leukaemia	Weighted mode	0.488816762013566	0.138835817594948	1.72103878498082	0.327483050023924
C19orf12	Acute Lymphoblastic Leukemia	MR Egger	1.21824314776933	0.87439373819341	1.69730900652749	0.249470733785815			KRT5	Acute lymphocytic leukaemia	MR Egger	0.610844134820817	0.0661236402909852	5.6429221894467	0.675381992802035
C19orf12	Acute Lymphoblastic Leukemia	Weighted median	1.27378805667959	0.95076231227182	1.70656324130326	0.104878277724014			KRT5	Acute lymphocytic leukaemia	Weighted median	0.613318291678957	0.196621444287105	1.91311445336924	0.399627928089967
C19orf12	Acute Lymphoblastic Leukemia	Inverse variance weighted	1.28646595771553	1.04885560170794	1.57790515459512	0.0156127777323818			KRT5	Acute lymphocytic leukaemia	Inverse variance weighted	0.837854806395305	0.323565136434568	2.16958070432188	0.715529389777148
C19orf12	Acute Lymphoblastic Leukemia	Simple mode	1.32845907791529	0.836467275402679	2.10982972507317	0.23497777408947			KRT5	Acute lymphocytic leukaemia	Simple mode	0.738554059307748	0.126067201175046	4.32675663008155	0.744574838462654
C19orf12	Acute Lymphoblastic Leukemia	Weighted mode	1.25227059600091	0.932067686855479	1.68247614172641	0.142244326774679			KRT5	Acute lymphocytic leukaemia	Weighted mode	0.629288891054153	0.18540898481048	2.13584314055196	0.476504003043557
C19orf18	Acute Lymphoblastic Leukemia	MR Egger	0.346901671579621	0.00358749586259437	33.5445041204057	0.728736983079464			SVEP1	Acute lymphocytic leukaemia	MR Egger	1.04083817453653	0.597128471134418	1.81425632496539	0.889732059581477
C19orf18	Acute Lymphoblastic Leukemia	Weighted median	5.30814604305388	0.816889555577699	34.4923181132637	0.0804322010974981			SVEP1	Acute lymphocytic leukaemia	Weighted median	0.811705467227328	0.482502020032445	1.36551918576928	0.431810125529712
C19orf18	Acute Lymphoblastic Leukemia	Inverse variance weighted	5.80302936861842	1.17392993788014	28.685825930854	0.031030575686373			SVEP1	Acute lymphocytic leukaemia	Inverse variance weighted	1.00962745205873	0.6755266228494	1.50896731153385	0.962725692066492
C19orf18	Acute Lymphoblastic Leukemia	Simple mode	8.92456039520382	0.796954620114526	99.9401675294822	0.217741777317507			SVEP1	Acute lymphocytic leukaemia	Simple mode	0.964848802187942	0.370695214943801	2.51131704309871	0.942520983909864
C19orf18	Acute Lymphoblastic Leukemia	Weighted mode	4.65019009525182	0.477779953707374	45.2598895248384	0.316613607420556			SVEP1	Acute lymphocytic leukaemia	Weighted mode	0.821099183957969	0.496660920253891	1.35747316207563	0.454137079402459
C19orf35	Acute Lymphoblastic Leukemia	MR Egger	1.35545610902213	0.81256996985468	2.26104991772461	0.253520462375338			SMARCC1	Acute lymphocytic leukaemia	MR Egger	1.89107215635935	0.198240625760212	18.039460311648	0.599801278174812
C19orf35	Acute Lymphoblastic Leukemia	Weighted median	1.76915545590189	1.24292887009153	2.51817388948167	0.00153820777598274			SMARCC1	Acute lymphocytic leukaemia	Weighted median	1.0710738450753	0.383454321789938	2.99174925516383	0.895764321799561
C19orf35	Acute Lymphoblastic Leukemia	Inverse variance weighted	1.4249823979321	1.10812906694799	1.83243531370305	0.00577661252377562			SMARCC1	Acute lymphocytic leukaemia	Inverse variance weighted	1.08788319807564	0.407493607026758	2.90431514077118	0.866480490435989
C19orf35	Acute Lymphoblastic Leukemia	Simple mode	1.75070518974113	0.923902335848948	3.31741629224285	0.096234428793522			SMARCC1	Acute lymphocytic leukaemia	Simple mode	0.285622795305779	0.031708450661524	2.57282773192319	0.300720246629995
C19orf35	Acute Lymphoblastic Leukemia	Weighted mode	1.64714156467911	1.11138432023664	2.44116754635865	0.0187095518751866			SMARCC1	Acute lymphocytic leukaemia	Weighted mode	1.06599860009394	0.37372026488266	3.0406513164573	0.908227482616097
C19orf54	Acute Lymphoblastic Leukemia	MR Egger	0.92593572563023	0.470311726740997	1.82295468994446	0.825371206761376			CLEC12A	Acute lymphocytic leukaemia	MR Egger	1.11139436232937	0.625789101036468	1.97382381152326	0.723251685025726
C19orf54	Acute Lymphoblastic Leukemia	Weighted median	0.762089601256142	0.448663769085705	1.29446726114362	0.314828400243313			CLEC12A	Acute lymphocytic leukaemia	Weighted median	1.28385214473881	0.791922575457476	2.0813604519334	0.310765888668241
C19orf54	Acute Lymphoblastic Leukemia	Inverse variance weighted	0.675370129473159	0.472849671845507	0.964629646467471	0.0309282837644201			CLEC12A	Acute lymphocytic leukaemia	Inverse variance weighted	1.19272869598406	0.816379478481661	1.74257410888091	0.362212515987027
C19orf54	Acute Lymphoblastic Leukemia	Simple mode	0.798009290392047	0.351835478912589	1.80999036686187	0.593176574936025			CLEC12A	Acute lymphocytic leukaemia	Simple mode	1.12253584892833	0.466314856893563	2.7022230012647	0.799583830926074
C19orf54	Acute Lymphoblastic Leukemia	Weighted mode	0.782899891001537	0.473293441647866	1.29503640953945	0.348130591525472			CLEC12A	Acute lymphocytic leukaemia	Weighted mode	1.30469127718936	0.84956922599698	2.00362639875099	0.240912974651602
C19orf66	Acute Lymphoblastic Leukemia	MR Egger	2.7073822752986	1.18482001822146	6.18652510244045	0.0331805098112017			TINAGL1	Acute lymphocytic leukaemia	MR Egger	2.13799560479381	0.275351790318017	16.6006736358545	0.480315364838344
C19orf66	Acute Lymphoblastic Leukemia	Weighted median	1.84786450256062	1.03312586216063	3.30511832574056	0.0384658900154001			TINAGL1	Acute lymphocytic leukaemia	Weighted median	3.06152317772055	1.13803845135281	8.23603469336062	0.0266845301729708
C19orf66	Acute Lymphoblastic Leukemia	Inverse variance weighted	1.57028418726979	1.01051745675531	2.44012848299227	0.0448005978183001			TINAGL1	Acute lymphocytic leukaemia	Inverse variance weighted	1.84894323970966	0.903664296632029	3.78303216848249	0.0924387287148677
C19orf66	Acute Lymphoblastic Leukemia	Simple mode	1.65551025991834	0.715295851212996	3.83158131848132	0.257372449285852			TINAGL1	Acute lymphocytic leukaemia	Simple mode	3.64043922569178	0.598820920749076	22.1314875562083	0.182363115345421
C19orf66	Acute Lymphoblastic Leukemia	Weighted mode	1.87561590913514	1.04711308871686	3.35965148034941	0.0515967470729133			TINAGL1	Acute lymphocytic leukaemia	Weighted mode	4.24984228619283	0.686531178590226	26.3078502779741	0.142107462502017
C1orf109	Acute Lymphoblastic Leukemia	MR Egger	0.589117395025617	0.219618363835998	1.58028362956451	0.312387468593437			CREB3L1	Acute lymphocytic leukaemia	MR Egger	0.0444745394469908	0.000113868145670958	17.3708340235704	0.492956561095952
C1orf109	Acute Lymphoblastic Leukemia	Weighted median	0.574476434349396	0.299240252118768	1.10287025654493	0.0957638588346932			CREB3L1	Acute lymphocytic leukaemia	Weighted median	1.76546207564054	0.315545337934843	9.87768147970098	0.517616335834961
C1orf109	Acute Lymphoblastic Leukemia	Inverse variance weighted	0.447352080706227	0.271467424412105	0.737192996712525	0.00159720271629397			CREB3L1	Acute lymphocytic leukaemia	Inverse variance weighted	1.80133809655776	0.352965370346683	9.19302348251122	0.4791211199702
C1orf109	Acute Lymphoblastic Leukemia	Simple mode	0.419225942600757	0.138695478706174	1.26716741301871	0.145749108484228			CREB3L1	Acute lymphocytic leukaemia	Simple mode	0.66914869936152	0.0519543909897105	8.61832798590387	0.787124357098982
C1orf109	Acute Lymphoblastic Leukemia	Weighted mode	0.511134040819666	0.261123272589757	1.00051598271401	0.0704019533395764			CREB3L1	Acute lymphocytic leukaemia	Weighted mode	1.18302224075874	0.213539047618326	6.55403139491063	0.865181809892599
C1orf131	Acute Lymphoblastic Leukemia	MR Egger	0.249333943507661	0.0305327703632339	2.03608826338079	0.227100858267197			TBX5	Acute lymphocytic leukaemia	MR Egger	0.00837496557647088	4.68229513885316e-06	14.979843501333	0.429149073778342
C1orf131	Acute Lymphoblastic Leukemia	Weighted median	0.346737947034667	0.124538701708927	0.965380257414372	0.0426172641719974			TBX5	Acute lymphocytic leukaemia	Weighted median	0.476497280453778	0.0402062055496905	5.64712971979504	0.556765874523732
C1orf131	Acute Lymphoblastic Leukemia	Inverse variance weighted	0.382325565000571	0.171870955030944	0.850480161855672	0.018422168863883			TBX5	Acute lymphocytic leukaemia	Inverse variance weighted	0.685275361324251	0.0522962390527175	8.97965760720762	0.7734188699592
C1orf131	Acute Lymphoblastic Leukemia	Simple mode	0.540457615811088	0.105242785341768	2.77543428311643	0.477977359536568			TBX5	Acute lymphocytic leukaemia	Simple mode	0.504951413477225	0.0105908093258426	24.075207297943	0.761990505987107
C1orf131	Acute Lymphoblastic Leukemia	Weighted mode	0.318713814860877	0.0997352076381922	1.01848181989722	0.0825566363897211			TBX5	Acute lymphocytic leukaemia	Weighted mode	0.253346021451259	0.0169588218204407	3.78470905967181	0.42448894398248
C1orf145	Acute Lymphoblastic Leukemia	MR Egger	1.38321371233961	0.504316067993273	3.79381164993906	0.551796516849918			MSR1	Acute lymphocytic leukaemia	MR Egger	0.267463914487567	0.030916653420504	2.31386445939098	0.353648686383472
C1orf145	Acute Lymphoblastic Leukemia	Weighted median	0.725960526131687	0.449538636547403	1.17235459347624	0.190294557938351			MSR1	Acute lymphocytic leukaemia	Weighted median	0.902118163932516	0.286650072621904	2.83906148794321	0.860213030023159
C1orf145	Acute Lymphoblastic Leukemia	Inverse variance weighted	0.66083663010812	0.45399804170621	0.96190954932633	0.0305601719475286			MSR1	Acute lymphocytic leukaemia	Inverse variance weighted	1.15380516747031	0.394547386271273	3.37416090133688	0.793852634528845
C1orf145	Acute Lymphoblastic Leukemia	Simple mode	0.368302328206793	0.167405141306317	0.810289360912392	0.0420302061137808			MSR1	Acute lymphocytic leukaemia	Simple mode	0.774920597766946	0.189766586125385	3.16442396474746	0.74592792952721
C1orf145	Acute Lymphoblastic Leukemia	Weighted mode	0.725066075903799	0.424810152486372	1.23754296207268	0.277048922305334			MSR1	Acute lymphocytic leukaemia	Weighted mode	0.878978791694393	0.282935174694329	2.73067396827992	0.837825643320732
C1QL3	Acute Lymphoblastic Leukemia	MR Egger	1.30538057472974	0.63036395438837	2.70322951212385	0.491248647147711			NAGPA	Acute lymphocytic leukaemia	MR Egger	1.1227433881236	0.489301777193087	2.57622754367767	0.790247195383559
C1QL3	Acute Lymphoblastic Leukemia	Weighted median	1.60027470798182	0.983033152217987	2.60507912192814	0.0586017519061133			NAGPA	Acute lymphocytic leukaemia	Weighted median	1.04679989301849	0.549570271857312	1.99390336802649	0.889351397099214
C1QL3	Acute Lymphoblastic Leukemia	Inverse variance weighted	1.62784672573757	1.06982728961643	2.47692780714597	0.0228959453523383			NAGPA	Acute lymphocytic leukaemia	Inverse variance weighted	1.00025295100059	0.588148301465818	1.70111171534776	0.999255166408839
C1QL3	Acute Lymphoblastic Leukemia	Simple mode	3.06883541559468	1.28119	7.35077693688068	0.0305964622783923			NAGPA	Acute lymphocytic leukaemia	Simple mode	1.11849923402946	0.403575337897715	3.09989342520616	0.833455672096674
C1QL3	Acute Lymphoblastic Leukemia	Weighted mode	1.5884581285292	0.978282241450766	2.57921397238967	0.0908263786550216			NAGPA	Acute lymphocytic leukaemia	Weighted mode	1.0419504249233	0.551332429287657	1.96915804390569	0.901586931149418
C1QTNF4	Acute Lymphoblastic Leukemia	MR Egger	1.47661572690635	0.870408058384879	2.50502506720019	0.159469395740649			TBCE	Acute lymphocytic leukaemia	MR Egger	0.375550547430493	0.00368971037308208	38.2247383708687	0.699278993968721
C1QTNF4	Acute Lymphoblastic Leukemia	Weighted median	1.48193402655948	1.05061620490643	2.09032418195983	0.0250029705724498			TBCE	Acute lymphocytic leukaemia	Weighted median	0.784884084294644	0.157945249711492	3.90035804751537	0.767145976040761
C1QTNF4	Acute Lymphoblastic Leukemia	Inverse variance weighted	1.31551545420086	1.03198827247325	1.67693854320051	0.0268121108438466			TBCE	Acute lymphocytic leukaemia	Inverse variance weighted	0.891046542844649	0.252807420441763	3.14058796267928	0.857561062528945
C1QTNF4	Acute Lymphoblastic Leukemia	Simple mode	1.37046409145442	0.833810550151323	2.25251626478595	0.223789015890801			TBCE	Acute lymphocytic leukaemia	Simple mode	1.42265597176233	0.178581587590599	11.3334753111892	0.752678898711117
C1QTNF4	Acute Lymphoblastic Leukemia	Weighted mode	1.48338053590779	1.06279316533252	2.07041020406038	0.0277047362395652			TBCE	Acute lymphocytic leukaemia	Weighted mode	0.794210449934481	0.137833812786265	4.57630987661385	0.806788780187118
C1R	Acute Lymphoblastic Leukemia	MR Egger	1.15367105924116	0.0224013578743976	59.4141176795255	0.949799980564027			TXNDC5	Acute lymphocytic leukaemia	MR Egger	3.0003892627844	0.509762316010622	17.6598690124523	0.270028197110266
C1R	Acute Lymphoblastic Leukemia	Weighted median	2.82106935214206	0.669480738170157	11.8874701479051	0.15758784069952			TXNDC5	Acute lymphocytic leukaemia	Weighted median	1.2292875713904	0.413301090258518	3.65628828181817	0.710489187003968
C1R	Acute Lymphoblastic Leukemia	Inverse variance weighted	3.66166995668893	1.00731198481765	13.3105006927378	0.048716575805546			TXNDC5	Acute lymphocytic leukaemia	Inverse variance weighted	1.26614989510306	0.535225304044916	2.99525367121835	0.591155855363342
C1R	Acute Lymphoblastic Leukemia	Simple mode	2.43702893804316	0.297450846090875	19.9666940703382	0.467369951878093			TXNDC5	Acute lymphocytic leukaemia	Simple mode	1.90309351163786	0.352000680848198	10.289084967992	0.479201914933275
C1R	Acute Lymphoblastic Leukemia	Weighted mode	2.43702893804316	0.484159868774464	12.2668366956832	0.35910472145172			TXNDC5	Acute lymphocytic leukaemia	Weighted mode	1.14357104871285	0.3618186199259	3.61439315567019	0.825792562619874
C20orf196	Acute Lymphoblastic Leukemia	MR Egger	0.545109218523772	0.281036984606059	1.05731301001581	0.0863862682341286			DNAJB9	Acute lymphocytic leukaemia	MR Egger	0.343182488376085	0.0959068736611131	1.22800604202944	0.131155271282469
C20orf196	Acute Lymphoblastic Leukemia	Weighted median	0.562361818925684	0.336079872623903	0.940998974191204	0.0284130297857916			DNAJB9	Acute lymphocytic leukaemia	Weighted median	0.462355536432479	0.169814510468663	1.25885969037501	0.131163712732536
C20orf196	Acute Lymphoblastic Leukemia	Inverse variance weighted	0.643040181589584	0.447855356365702	0.923290676914704	0.0167367158606196			DNAJB9	Acute lymphocytic leukaemia	Inverse variance weighted	0.621016682894826	0.27935069040005	1.38056476567643	0.242486166629925
C20orf196	Acute Lymphoblastic Leukemia	Simple mode	0.621184359140434	0.258213089651846	1.49438592970243	0.298784298567501			DNAJB9	Acute lymphocytic leukaemia	Simple mode	0.55739303749211	0.102587216351159	3.02851572832612	0.512489644730617
C20orf196	Acute Lymphoblastic Leukemia	Weighted mode	0.613699621331378	0.367779502763628	1.02405713856309	0.0744104047441523			DNAJB9	Acute lymphocytic leukaemia	Weighted mode	0.472394381744215	0.162938288704025	1.36957650456769	0.194720893509629
C20orf197	Acute Lymphoblastic Leukemia	MR Egger	1.63909277335364	0.77096201034153	3.48476978582899	0.216343231304236			CDH15	Acute lymphocytic leukaemia	MR Egger	0.784560160805109	0.215888554955464	2.85116849315851	0.719460013455908
C20orf197	Acute Lymphoblastic Leukemia	Weighted median	1.65733497540761	0.982153790078758	2.79666916572106	0.0584185986803315			CDH15	Acute lymphocytic leukaemia	Weighted median	0.816546723400769	0.326211728389433	2.04391348768603	0.665060923851196
C20orf197	Acute Lymphoblastic Leukemia	Inverse variance weighted	1.5246292475415	1.03015554252816	2.25644987237004	0.0349848850555735			CDH15	Acute lymphocytic leukaemia	Inverse variance weighted	1.26160572936256	0.598628470373318	2.6588261252724	0.541221747703875
C20orf197	Acute Lymphoblastic Leukemia	Simple mode	1.23828364018575	0.515717468883953	2.97322946393487	0.638234508658549			CDH15	Acute lymphocytic leukaemia	Simple mode	0.789874831584146	0.184281156532794	3.38559981556799	0.756202256232265
C20orf197	Acute Lymphoblastic Leukemia	Weighted mode	1.61919991933154	0.922276177123121	2.84275843158123	0.110576404177153			CDH15	Acute lymphocytic leukaemia	Weighted mode	0.926369832896187	0.395170591481702	2.17162179018032	0.863265244417881
C20orf27	Acute Lymphoblastic Leukemia	MR Egger	1.22664018972426	0.866791223782975	1.7358806985608	0.257166550514918			TPMT	Acute lymphocytic leukaemia	MR Egger	0.31126409331177	0.0379035094062236	2.55610462732746	0.305537078190812
C20orf27	Acute Lymphoblastic Leukemia	Weighted median	1.54405657061448	1.11648034217266	2.13538080627403	0.00863817645270673			TPMT	Acute lymphocytic leukaemia	Weighted median	0.480005577182724	0.153094973570207	1.50498314055269	0.208078351059529
C20orf27	Acute Lymphoblastic Leukemia	Inverse variance weighted	1.42167417125314	1.12622121179794	1.79463628285037	0.00307578971105347			TPMT	Acute lymphocytic leukaemia	Inverse variance weighted	0.922248949321818	0.305103603668204	2.78771903805551	0.885960952376354
C20orf27	Acute Lymphoblastic Leukemia	Simple mode	1.24218477698334	0.721217380472675	2.13947009867937	0.439727233128775			TPMT	Acute lymphocytic leukaemia	Simple mode	0.361480662521732	0.0642117164463591	2.03495992022432	0.275276936026087
C20orf27	Acute Lymphoblastic Leukemia	Weighted mode	1.45422130400562	1.09551287596915	1.93038315423995	0.0139890494090396			TPMT	Acute lymphocytic leukaemia	Weighted mode	0.391957199037678	0.118416383977355	1.29737491314412	0.156113367302057
C22orf29	Acute Lymphoblastic Leukemia	MR Egger	1.76049230442171	0.944708372725764	3.28073005745209	0.0875910046022165			FGFBP3	Acute lymphocytic leukaemia	MR Egger	1.14209785119785	0.42198724152712	3.09105909692988	0.800270638694569
C22orf29	Acute Lymphoblastic Leukemia	Weighted median	1.5037799130613	1.00333752864094	2.25383179874647	0.0481390310204724			FGFBP3	Acute lymphocytic leukaemia	Weighted median	1.37389022769343	0.685702196250767	2.75276113752042	0.370326366083168
C22orf29	Acute Lymphoblastic Leukemia	Inverse variance weighted	1.48174356227484	1.0953326471774	2.00447233084922	0.0107519926342627			FGFBP3	Acute lymphocytic leukaemia	Inverse variance weighted	1.48987135331701	0.806744292881831	2.75145008030418	0.20271450980576
C22orf29	Acute Lymphoblastic Leukemia	Simple mode	1.84427816417687	0.851272862209171	3.99561891122969	0.133285026934909			FGFBP3	Acute lymphocytic leukaemia	Simple mode	2.39565718781777	0.589160361566864	9.74127544202004	0.253195881334704
C22orf29	Acute Lymphoblastic Leukemia	Weighted mode	1.55677735325925	1.00401906236175	2.41385429667039	0.0590592297558249			FGFBP3	Acute lymphocytic leukaemia	Weighted mode	1.3843021711331	0.704512605889774	2.72002585189177	0.369988917475821
C3	Acute Lymphoblastic Leukemia	MR Egger	0.919841059414199	0.000833096784035667	1015.61738179512	0.985123311626937			TMEM154	Acute lymphocytic leukaemia	MR Egger	37.5848285549615	1.16410142767808	1213.48475649881	0.0800352664242028
C3	Acute Lymphoblastic Leukemia	Weighted median	0.14722481621239	0.0289541824007339	0.748601573644252	0.020945119089559			TMEM154	Acute lymphocytic leukaemia	Weighted median	1.05239312861222	0.240960120319604	4.59632612932467	0.945868871765162
C3	Acute Lymphoblastic Leukemia	Inverse variance weighted	0.176651827768887	0.0408409402258312	0.764083003024289	0.0203343734587863			TMEM154	Acute lymphocytic leukaemia	Inverse variance weighted	0.864661267403665	0.264194860032842	2.82987756557858	0.810028205855709
C3	Acute Lymphoblastic Leukemia	Simple mode	0.0917459899128807	0.00962861250680348	0.874199336524011	0.173429824600233			TMEM154	Acute lymphocytic leukaemia	Simple mode	0.979514459903937	0.116445590702718	8.23945819992744	0.985268088879649
C3	Acute Lymphoblastic Leukemia	Weighted mode	0.333838473060078	0.0517163729966442	2.15498728231224	0.368085774810607			TMEM154	Acute lymphocytic leukaemia	Weighted mode	1.00529085654183	0.16288030198836	6.20461586766226	0.995604980801536
C4BPA	Acute Lymphoblastic Leukemia	MR Egger	0.852550458658871	0.734611967652906	0.989423418844812	0.043225952287488			UBE3A	Acute lymphocytic leukaemia	MR Egger	1.42545760351738e-10	4.91254509664798e-21	4.13620504127685	0.316272985578568
C4BPA	Acute Lymphoblastic Leukemia	Weighted median	0.859156276404936	0.744914843989944	0.990917973029356	0.0370394203792554			UBE3A	Acute lymphocytic leukaemia	Weighted median	1.19887336869367	0.0587446825978928	24.4668502850071	0.906165214969419
C4BPA	Acute Lymphoblastic Leukemia	Inverse variance weighted	0.815082315184566	0.719148367766224	0.92381379184691	0.00137255750906376			UBE3A	Acute lymphocytic leukaemia	Inverse variance weighted	1.31505557151042	0.0645761021902564	26.7803583292386	0.858632265405319
C4BPA	Acute Lymphoblastic Leukemia	Simple mode	0.735305981374477	0.440564767985221	1.22723133018031	0.247334541667722			UBE3A	Acute lymphocytic leukaemia	Simple mode	2.53455735922263	0.0387088147106965	165.95654129948	0.705442064575439
C4BPA	Acute Lymphoblastic Leukemia	Weighted mode	0.849166774012835	0.736903151835609	0.978533214698786	0.0301521506376171			UBE3A	Acute lymphocytic leukaemia	Weighted mode	0.941247900400348	0.0180124816072361	49.185205532821	0.978793128389569
C4BPB	Acute Lymphoblastic Leukemia	MR Egger	2.78283403010012	0.906346855849831	8.54437259764309	0.0905909526987184			RIC3	Acute lymphocytic leukaemia	MR Egger	72.8485907797074	0.572545432734464	9268.98875647922	0.181249585737431
C4BPB	Acute Lymphoblastic Leukemia	Weighted median	2.70662190183665	1.39399901130841	5.25524197655336	0.00326918416033359			RIC3	Acute lymphocytic leukaemia	Weighted median	1.66853916974606	0.204516630855617	13.6126971646737	0.632626127198585
C4BPB	Acute Lymphoblastic Leukemia	Inverse variance weighted	2.41079298923714	1.39087428690256	4.17861117405366	0.00171438653340992			RIC3	Acute lymphocytic leukaemia	Inverse variance weighted	0.838851090410881	0.105535328918081	6.66763593857491	0.868043310221943
C4BPB	Acute Lymphoblastic Leukemia	Simple mode	3.76518371062279	1.23004120884415	11.5253117316783	0.0314497226994994			RIC3	Acute lymphocytic leukaemia	Simple mode	0.115947393105276	0.00364649196569013	3.68677569960449	0.28921610890148
C4BPB	Acute Lymphoblastic Leukemia	Weighted mode	2.9078448949314	1.54700153659473	5.46577474744535	0.00363952134759271			RIC3	Acute lymphocytic leukaemia	Weighted mode	3.11193266679534	0.292478400024829	33.1105644787644	0.399987415871111
C5orf22	Acute Lymphoblastic Leukemia	MR Egger	0.490089755057884	0.18538671809235	1.29560504918722	0.188415961755187			PCOLCE	Acute lymphocytic leukaemia	MR Egger	0.367226558260145	0.0308312788834691	4.37397830953739	0.458227134743406
C5orf22	Acute Lymphoblastic Leukemia	Weighted median	0.536254479950607	0.278903173568509	1.03107061704502	0.0617251991396995			PCOLCE	Acute lymphocytic leukaemia	Weighted median	0.748936485367477	0.250152234711256	2.24225803843819	0.605344625937976
C5orf22	Acute Lymphoblastic Leukemia	Inverse variance weighted	0.512254119265461	0.302891227631304	0.866331734849206	0.0125875358556024			PCOLCE	Acute lymphocytic leukaemia	Inverse variance weighted	0.676725784194564	0.207628660225351	2.20565786292075	0.51712892350859
C5orf22	Acute Lymphoblastic Leukemia	Simple mode	0.502932826509775	0.189603728350915	1.33405302828736	0.200628336041955			PCOLCE	Acute lymphocytic leukaemia	Simple mode	0.197045969054541	0.019086791073371	2.03424000249119	0.214867943819931
C5orf22	Acute Lymphoblastic Leukemia	Weighted mode	0.528751259583594	0.269439015106302	1.03762958902197	0.0969475432085117			PCOLCE	Acute lymphocytic leukaemia	Weighted mode	0.624157851230103	0.18046819505872	2.15867966721462	0.480797980368869
C6orf163	Acute Lymphoblastic Leukemia	MR Egger	0.751068099871821	0.264741957992153	2.13076648266607	0.607204564715689			TMPRSS6	Acute lymphocytic leukaemia	MR Egger	0.789893647322851	0.41295144061272	1.51090882055099	0.486929310921251
C6orf163	Acute Lymphoblastic Leukemia	Weighted median	0.585784155810841	0.305527383273627	1.12311725882752	0.107314924985352			TMPRSS6	Acute lymphocytic leukaemia	Weighted median	0.617705522846534	0.365305964813813	1.0444946146707	0.0722464716160163
C6orf163	Acute Lymphoblastic Leukemia	Inverse variance weighted	0.548086846729452	0.328014271289824	0.915811346794754	0.0216895360834728			TMPRSS6	Acute lymphocytic leukaemia	Inverse variance weighted	0.663015582776832	0.440597338938766	0.997712932319813	0.0487259894568049
C6orf163	Acute Lymphoblastic Leukemia	Simple mode	0.702896767063783	0.287586671848666	1.71796509891357	0.461642292982969			TMPRSS6	Acute lymphocytic leukaemia	Simple mode	0.656306321067385	0.301393161050522	1.42915647313179	0.304598337303138
C6orf163	Acute Lymphoblastic Leukemia	Weighted mode	0.575700780372087	0.293552732032659	1.12903527153737	0.146759277304975			TMPRSS6	Acute lymphocytic leukaemia	Weighted mode	0.626859206284875	0.385875455783678	1.01834013699071	0.0774992028046695
C6orf3	Acute Lymphoblastic Leukemia	MR Egger	1.02355508299522	0.751518224972599	1.39406467216888	0.88392002480442			ASL	Acute lymphocytic leukaemia	MR Egger	0.509292860942728	0.112978926497762	2.29581946162649	0.413595296111524
C6orf3	Acute Lymphoblastic Leukemia	Weighted median	0.913743416565788	0.728868399521858	1.14551135961586	0.434145798210714			ASL	Acute lymphocytic leukaemia	Weighted median	1.01101555321948	0.346998769809284	2.94569473376949	0.983980228697233
C6orf3	Acute Lymphoblastic Leukemia	Inverse variance weighted	0.783429172417207	0.655107434810937	0.936886433553362	0.00748808214631842			ASL	Acute lymphocytic leukaemia	Inverse variance weighted	0.868965864550225	0.362878905432516	2.08086406360137	0.752573941955325
C6orf3	Acute Lymphoblastic Leukemia	Simple mode	0.984156956561651	0.635978674819927	1.52295187479821	0.943468976557403			ASL	Acute lymphocytic leukaemia	Simple mode	0.954862988972891	0.202061124941453	4.51231441958183	0.955145186618461
C6orf3	Acute Lymphoblastic Leukemia	Weighted mode	0.925275203692259	0.734609525025009	1.16542758214115	0.516013765494915			ASL	Acute lymphocytic leukaemia	Weighted mode	1.0069840630399	0.286580435760651	3.53833261689656	0.991642176181137
C7orf25	Acute Lymphoblastic Leukemia	MR Egger	1.44512303196505	0.912536313790895	2.28854517453692	0.126303508150871			TGM1	Acute lymphocytic leukaemia	MR Egger	14.7216992400907	1.23463304350003e-10	1755407646480.04	0.870254568463704
C7orf25	Acute Lymphoblastic Leukemia	Weighted median	1.49899118332051	0.961173066450233	2.33774191777041	0.0742061318970165			TGM1	Acute lymphocytic leukaemia	Weighted median	2.59161018657212	0.23000074690325	29.2018328182633	0.440916816912501
C7orf25	Acute Lymphoblastic Leukemia	Inverse variance weighted	1.41415321577739	1.0456606119813	1.91250324893111	0.0244561068531543			TGM1	Acute lymphocytic leukaemia	Inverse variance weighted	3.06249096599626	0.369761487800535	25.3645964391729	0.299440622623779
C7orf25	Acute Lymphoblastic Leukemia	Simple mode	1.11613744243033	0.579911229649168	2.14819566634116	0.744304498113711			TGM1	Acute lymphocytic leukaemia	Simple mode	2.16516574749442	0.106977180660917	43.8218943999124	0.664644373997029
C7orf25	Acute Lymphoblastic Leukemia	Weighted mode	1.64179157071786	1.07325807250277	2.51149246461714	0.0288091911672522			TGM1	Acute lymphocytic leukaemia	Weighted mode	2.23125195144806	0.125867966702417	39.5532350388338	0.63918663799425
C7orf29	Acute Lymphoblastic Leukemia	MR Egger	1.48769580158992	0.908109536461639	2.43719365253221	0.131238902822792			ADGRF1	Acute lymphocytic leukaemia	MR Egger	0.061638650459046	0.00332315337020305	1.14328855973936	0.134811219735358
C7orf29	Acute Lymphoblastic Leukemia	Weighted median	1.39998788464741	0.905568658994614	2.16434839886744	0.130092338553805			ADGRF1	Acute lymphocytic leukaemia	Weighted median	0.279639481340914	0.0876831060723016	0.891827890541819	0.031281498049261
C7orf29	Acute Lymphoblastic Leukemia	Inverse variance weighted	1.55650794353969	1.14909444942325	2.10837062133419	0.00426883817992565			ADGRF1	Acute lymphocytic leukaemia	Inverse variance weighted	0.466442002065301	0.174036554610267	1.25012898455674	0.129477822802319
C7orf29	Acute Lymphoblastic Leukemia	Simple mode	1.27778513447604	0.588404565572013	2.77485074967203	0.542540426471918			ADGRF1	Acute lymphocytic leukaemia	Simple mode	0.277727111705303	0.0435243674441721	1.77216472301651	0.233460381515819
C7orf29	Acute Lymphoblastic Leukemia	Weighted mode	1.37773873670497	0.87087815423539	2.17959770535746	0.186103075977393			ADGRF1	Acute lymphocytic leukaemia	Weighted mode	0.26945692647223	0.0802484789737606	0.904777712330243	0.0872930731077865
C7orf34	Acute Lymphoblastic Leukemia	MR Egger	1.14843953202236	0.782725485419432	1.68502672173117	0.488264353340227			NAGS	Acute lymphocytic leukaemia	MR Egger	0.00678858434280138	6.82331204873954e-06	6.75403338586006	0.39110525202514
C7orf34	Acute Lymphoblastic Leukemia	Weighted median	1.29876293215903	0.982980279332591	1.7159908386927	0.0658823530957747			NAGS	Acute lymphocytic leukaemia	Weighted median	1.79866356578205	0.399658871643522	8.09488003998936	0.444310184964953
C7orf34	Acute Lymphoblastic Leukemia	Inverse variance weighted	1.28655166420121	1.04578893843858	1.58274306011521	0.0171476178528626			NAGS	Acute lymphocytic leukaemia	Inverse variance weighted	1.86236301884754	0.332785717551306	10.4223103067402	0.47910042138229
C7orf34	Acute Lymphoblastic Leukemia	Simple mode	1.47101115709328	0.962923933290782	2.24719082108375	0.0901961480881288			NAGS	Acute lymphocytic leukaemia	Simple mode	0.591116419675735	0.0431889084650982	8.09047123505406	0.731721876495455
C7orf34	Acute Lymphoblastic Leukemia	Weighted mode	1.31054526834111	0.974588580021551	1.76231174423703	0.0894598843963516			NAGS	Acute lymphocytic leukaemia	Weighted mode	1.07364803874335	0.20195220986081	5.70788560269737	0.941155515470693
C7orf41	Acute Lymphoblastic Leukemia	MR Egger	0.306431180250476	0.0710037061968705	1.3224671395229	0.188065050659245			UROS	Acute lymphocytic leukaemia	MR Egger	3.64189434945193	0.971329782617335	13.6548829140505	0.127732641591211
C7orf41	Acute Lymphoblastic Leukemia	Weighted median	0.333340225552363	0.113358885188692	0.980211703620252	0.0458992018104329			UROS	Acute lymphocytic leukaemia	Weighted median	2.44912630720335	0.917405639477911	6.53824154825236	0.0737874655258701
C7orf41	Acute Lymphoblastic Leukemia	Inverse variance weighted	0.360044005014296	0.149548387817955	0.866821016516307	0.0226769979248608			UROS	Acute lymphocytic leukaemia	Inverse variance weighted	1.89967715442942	0.793845575388102	4.54593865979133	0.149469582482985
C7orf41	Acute Lymphoblastic Leukemia	Simple mode	0.200548709933248	0.035028457760106	1.14820313618536	0.130951791096926			UROS	Acute lymphocytic leukaemia	Simple mode	2.55067514248548	0.517844240377174	12.563514615427	0.301768769801341
C7orf41	Acute Lymphoblastic Leukemia	Weighted mode	0.294210560502819	0.0811103818933887	1.06718587547963	0.121800684067108			UROS	Acute lymphocytic leukaemia	Weighted mode	2.55067514248548	0.905003540670106	7.18885992167061	0.136737848493754
C7orf49	Acute Lymphoblastic Leukemia	MR Egger	1.68043020916338	0.590725121541439	4.7803040447989	0.353450796457323			PAPLN	Acute lymphocytic leukaemia	MR Egger	0.0187873735669425	3.82308541475535e-05	9.23247501040828	0.335652026077314
C7orf49	Acute Lymphoblastic Leukemia	Weighted median	1.83372178350769	0.957542442969576	3.51163084623441	0.0673811755398675			PAPLN	Acute lymphocytic leukaemia	Weighted median	5.71835219088435	1.05849704518351	30.8924355790929	0.042759000593772
C7orf49	Acute Lymphoblastic Leukemia	Inverse variance weighted	1.90609328334536	1.11318154824911	3.26379071817068	0.0187358983255073			PAPLN	Acute lymphocytic leukaemia	Inverse variance weighted	3.48199197472493	0.8097753644967	14.9723844952784	0.0936460562201818
C7orf49	Acute Lymphoblastic Leukemia	Simple mode	2.13018003422168	0.786586567031398	5.76880812409746	0.164917342309287			PAPLN	Acute lymphocytic leukaemia	Simple mode	13.556488966412	0.641530866651866	286.468512506006	0.192564559795688
C7orf49	Acute Lymphoblastic Leukemia	Weighted mode	1.89834520199734	0.954929250538484	3.77380261827167	0.0947024256671977			PAPLN	Acute lymphocytic leukaemia	Weighted mode	1.05256604655716	0.153631890463474	7.21136268663158	0.961666835677931
C7orf53	Acute Lymphoblastic Leukemia	MR Egger	1.36074836120462	0.86681923213798	2.13612715762439	0.189783646633368			QDPR	Acute lymphocytic leukaemia	MR Egger	2.21548583226363	0.925366870659848	5.30425026936709	0.172101551299025
C7orf53	Acute Lymphoblastic Leukemia	Weighted median	1.32335555925453	0.884290831485067	1.98042303940753	0.173152590185162			QDPR	Acute lymphocytic leukaemia	Weighted median	1.56390550017217	0.901745191477361	2.71229659618338	0.11141953919805
C7orf53	Acute Lymphoblastic Leukemia	Inverse variance weighted	1.56031175115909	1.19333078409794	2.04014912985377	0.00114605843989164			QDPR	Acute lymphocytic leukaemia	Inverse variance weighted	1.53955417761016	0.898007285172161	2.63942966269197	0.116680253289354
C7orf53	Acute Lymphoblastic Leukemia	Simple mode	1.10028965860798	0.535452441023719	2.26096146004129	0.796359972231929			QDPR	Acute lymphocytic leukaemia	Simple mode	1.91124996792007	0.488890950660046	7.47176120757148	0.404452654802554
C7orf53	Acute Lymphoblastic Leukemia	Weighted mode	1.28433312363424	0.819504628414634	2.01281544395317	0.282665509806081			QDPR	Acute lymphocytic leukaemia	Weighted mode	1.53357785621973	0.887756614393033	2.6492182687881	0.200017912195547
C8orf46	Acute Lymphoblastic Leukemia	MR Egger	0.7029459152786	0.342422142615596	1.44305200601932	0.345309182604533			MADCAM1	Acute lymphocytic leukaemia	MR Egger	1.04511113988221	9.95836908728286e-06	109682.347092431	0.99523797419705
C8orf46	Acute Lymphoblastic Leukemia	Weighted median	0.707507227393838	0.428316561029701	1.16868345134991	0.176614043799748			MADCAM1	Acute lymphocytic leukaemia	Weighted median	1.57915349811234	0.128226811741955	19.4477717781741	0.721350867443448
C8orf46	Acute Lymphoblastic Leukemia	Inverse variance weighted	0.675558566603778	0.472921059907718	0.96502231683403	0.0311081727713772			MADCAM1	Acute lymphocytic leukaemia	Inverse variance weighted	2.43104697350161	0.286033273123392	20.6618947608302	0.415865501225306
C8orf46	Acute Lymphoblastic Leukemia	Simple mode	0.798972831610769	0.336447508180669	1.89734674839482	0.615017579478091			MADCAM1	Acute lymphocytic leukaemia	Simple mode	0.666299637205564	0.015431255535375	28.769869407096	0.852197089583874
C8orf46	Acute Lymphoblastic Leukemia	Weighted mode	0.715436456344526	0.449052380086069	1.1398432471702	0.169791637225339			MADCAM1	Acute lymphocytic leukaemia	Weighted mode	10.1225435894339	0.576004878301812	177.890661311898	0.254296646994557
C9orf84	Acute Lymphoblastic Leukemia	MR Egger	2.57615932415277	0.361308285848548	18.3682387682666	0.372697645965259			SUN5	Acute lymphocytic leukaemia	MR Egger	25.4047415923718	1.31629346668337	490.316872119246	0.0988690055133084
C9orf84	Acute Lymphoblastic Leukemia	Weighted median	1.27628768694777	0.451940090507189	3.60426148082248	0.645102246925462			SUN5	Acute lymphocytic leukaemia	Weighted median	1.2110237713693	0.289031725333767	5.07410933221242	0.793369821969659
C9orf84	Acute Lymphoblastic Leukemia	Inverse variance weighted	2.1991825626409	1.01390989846837	4.77005299102979	0.0460462583207027			SUN5	Acute lymphocytic leukaemia	Inverse variance weighted	1.39006512694412	0.404332352974265	4.77894247871171	0.601148479859445
C9orf84	Acute Lymphoblastic Leukemia	Simple mode	1.1028781001319	0.17675152462645	6.88163853930642	0.918812859340061			SUN5	Acute lymphocytic leukaemia	Simple mode	1.15906222877629	0.129328406143573	10.3877043739676	0.900186247731461
C9orf84	Acute Lymphoblastic Leukemia	Weighted mode	1.1028781001319	0.375205661172824	3.24179571264595	0.862658513877382			SUN5	Acute lymphocytic leukaemia	Weighted mode	1.15906222877629	0.22795579865845	5.8933585286362	0.865777788490629
C9orf91	Acute Lymphoblastic Leukemia	MR Egger	1.12020280603555	0.514940325632357	2.43689271200294	0.777141506980514			TRABD	Acute lymphocytic leukaemia	MR Egger	0.0687323783020643	1.82156561205967e-09	2593450.26925295	0.783201064616782
C9orf91	Acute Lymphoblastic Leukemia	Weighted median	0.737089971723826	0.422135624602086	1.2870309795056	0.283418836114306			TRABD	Acute lymphocytic leukaemia	Weighted median	0.44535070879558	0.0523599099769006	3.78796017625365	0.458932381951436
C9orf91	Acute Lymphoblastic Leukemia	Inverse variance weighted	0.543494916779828	0.358943073708222	0.822934738686797	0.00396783412890813			TRABD	Acute lymphocytic leukaemia	Inverse variance weighted	0.691569801584977	0.094689348120705	5.05092494516503	0.716208523373226
C9orf91	Acute Lymphoblastic Leukemia	Simple mode	0.715598798468912	0.25647580547275	1.9966079818962	0.528499177595884			TRABD	Acute lymphocytic leukaemia	Simple mode	0.141822473434767	0.00596814305820882	3.37016284210717	0.293460407145124
C9orf91	Acute Lymphoblastic Leukemia	Weighted mode	0.746189711080773	0.424795048799643	1.31074758638589	0.318159601563803			TRABD	Acute lymphocytic leukaemia	Weighted mode	0.297398656859307	0.0150786187364518	5.86565405277515	0.470018149894889
CA2	Acute Lymphoblastic Leukemia	MR Egger	0.801855416121631	0.467128790864032	1.37643433874909	0.428363604822947			CASQ1	Acute lymphocytic leukaemia	MR Egger	0.560200414568901	0.0323727091334108	9.69410694637481	0.710706378379761
CA2	Acute Lymphoblastic Leukemia	Weighted median	0.883641377549764	0.59491404118335	1.31249563813438	0.539983422371944			CASQ1	Acute lymphocytic leukaemia	Weighted median	0.925481332128735	0.292233951973514	2.9309246592826	0.895244513175311
CA2	Acute Lymphoblastic Leukemia	Inverse variance weighted	0.675729916364678	0.520380649860113	0.877455608683681	0.00327319550393898			CASQ1	Acute lymphocytic leukaemia	Inverse variance weighted	1.19512363882048	0.38518084381346	3.70818	0.757663448675126
CA2	Acute Lymphoblastic Leukemia	Simple mode	1.01687794446228	0.435540793351411	2.37415362629312	0.969346205753739			CASQ1	Acute lymphocytic leukaemia	Simple mode	1.77626411229193	0.185475268825312	17.0109697999028	0.639352724736806
CA2	Acute Lymphoblastic Leukemia	Weighted mode	0.951916424755965	0.604421924815894	1.49919260456376	0.83277009544377			CASQ1	Acute lymphocytic leukaemia	Weighted mode	0.93122878847197	0.257889527359357	3.3626299809786	0.917619465742179
CACNA2D3	Acute Lymphoblastic Leukemia	MR Egger	0.420335392209661	0.0690841908131374	2.55749	0.362783259406744			XDH	Acute lymphocytic leukaemia	MR Egger	82561.820080988	5.64221933387015e-36	1.20811576646203e+45	0.850089246909285
CACNA2D3	Acute Lymphoblastic Leukemia	Weighted median	1.14333620847256	0.492791972992426	2.65267649890169	0.75507850515714			XDH	Acute lymphocytic leukaemia	Weighted median	0.996714953596484	0.0379155042060736	26.2014371040252	0.998425934338102
CACNA2D3	Acute Lymphoblastic Leukemia	Inverse variance weighted	1.90084879851628	1.0357902712656	3.48837622350506	0.038123801978013			XDH	Acute lymphocytic leukaemia	Inverse variance weighted	1.20111484255479	0.0915867952468419	15.7520181934214	0.889013116083577
CACNA2D3	Acute Lymphoblastic Leukemia	Simple mode	1.17917691359639	0.244291420802791	5.69180116513868	0.840168330678976			XDH	Acute lymphocytic leukaemia	Simple mode	0.77015708955226	0.0149619270771331	39.6434188944904	0.908544619739794
CACNA2D3	Acute Lymphoblastic Leukemia	Weighted mode	1.11126888169345	0.373309272216627	3.3080306848194	0.852192873300831			XDH	Acute lymphocytic leukaemia	Weighted mode	0.702594600109063	0.012525408651014	39.4110232932361	0.87940748195582
CACUL1	Acute Lymphoblastic Leukemia	MR Egger	0.279339021403496	0.100604692849228	0.7756128135653	0.0293402004564829			SELPLG	Acute lymphocytic leukaemia	MR Egger	0.675435657507752	0.278648622273215	1.63723518067716	0.394863593833585
CACUL1	Acute Lymphoblastic Leukemia	Weighted median	0.338588896852936	0.182393920627956	0.628543104273381	0.000600857888725769			SELPLG	Acute lymphocytic leukaemia	Weighted median	0.741543762680652	0.393325627512867	1.39804557218329	0.355341546564572
CACUL1	Acute Lymphoblastic Leukemia	Inverse variance weighted	0.453451233850776	0.272965541896386	0.753274644309651	0.00225713291733639			SELPLG	Acute lymphocytic leukaemia	Inverse variance weighted	0.87197176734465	0.541922754211646	1.40303162607047	0.572383313975449
CACUL1	Acute Lymphoblastic Leukemia	Simple mode	0.31232098665988	0.130235639009997	0.748983914462257	0.0206661559178739			SELPLG	Acute lymphocytic leukaemia	Simple mode	1.09340848154302	0.369434431668813	3.23614153155597	0.873326344581509
CACUL1	Acute Lymphoblastic Leukemia	Weighted mode	0.321573793258322	0.179436622544903	0.57630211182039	0.00190684228847076			SELPLG	Acute lymphocytic leukaemia	Weighted mode	0.80778753015752	0.441687615181668	1.47733527373096	0.495548004927667
CAMK2D	Acute Lymphoblastic Leukemia	MR Egger	0.275030571011042	0.12808435418958	0.590562488832173	0.00304965621121314			CHCHD10	Acute lymphocytic leukaemia	MR Egger	0.00432460100878941	1.40722494268603e-07	132.901097173027	0.489813195838109
CAMK2D	Acute Lymphoblastic Leukemia	Weighted median	0.589753130124238	0.3386693403719	1.0269862459631	0.0620544915200728			CHCHD10	Acute lymphocytic leukaemia	Weighted median	1.19316883132888	0.142951872870966	9.95895913402814	0.870407994328829
CAMK2D	Acute Lymphoblastic Leukemia	Inverse variance weighted	0.47933760053225	0.319419499371845	0.719319063913939	0.000384001048249458			CHCHD10	Acute lymphocytic leukaemia	Inverse variance weighted	2.10137426828289	0.384423794501125	11.4867338561389	0.391517067528245
CAMK2D	Acute Lymphoblastic Leukemia	Simple mode	0.569911715382708	0.2338475893137	1.38893611981927	0.228004711175478			CHCHD10	Acute lymphocytic leukaemia	Simple mode	1.07851599084574	0.0973444559547504	11.9492859773202	0.956484856481271
CAMK2D	Acute Lymphoblastic Leukemia	Weighted mode	0.569911715382708	0.310350715029736	1.04655587244044	0.0823188746530093			CHCHD10	Acute lymphocytic leukaemia	Weighted mode	1.0615584285467	0.0807773054355015	13.9507785156109	0.967874036249134
CANX	Acute Lymphoblastic Leukemia	MR Egger	0.710848920459898	0.229147619384693	2.20515573792933	0.569136178656941			GSTT2B	Acute lymphocytic leukaemia	MR Egger	0.807061044017408	0.207043388251235	3.14594701271067	0.777663889599779
CANX	Acute Lymphoblastic Leukemia	Weighted median	0.530655098326457	0.277684520093552	1.01408185549915	0.0551516679002032			GSTT2B	Acute lymphocytic leukaemia	Weighted median	1.16730110588967	0.550072232228778	2.47711444420729	0.686964167088566
CANX	Acute Lymphoblastic Leukemia	Inverse variance weighted	0.515652950166532	0.319101967782536	0.833269587345993	0.00683226617383649			GSTT2B	Acute lymphocytic leukaemia	Inverse variance weighted	1.1565229728488	0.560267275265802	2.3873344844074	0.694126918919513
CANX	Acute Lymphoblastic Leukemia	Simple mode	0.298660444986439	0.120104766468924	0.742668788441273	0.0264861799920634			GSTT2B	Acute lymphocytic leukaemia	Simple mode	0.63578040585272	0.0946773914668804	4.26941129453963	0.665374371002036
CANX	Acute Lymphoblastic Leukemia	Weighted mode	0.542712930355801	0.286914374291215	1.02656872979263	0.0896169350784081			GSTT2B	Acute lymphocytic leukaemia	Weighted mode	1.16627701104908	0.548658360505956	2.4791421482163	0.70973953695924
CAPN10	Acute Lymphoblastic Leukemia	MR Egger	13.2156150686666	1.13934381470907	153.29216641051	0.130952341485144			LRP1B	Acute lymphocytic leukaemia	MR Egger	1.82232199903471	0.451730304916455	7.35141617027451	0.553989778957602
CAPN10	Acute Lymphoblastic Leukemia	Weighted median	4.6057839788855	1.27052414777146	16.6964524817313	0.020105014422989			LRP1B	Acute lymphocytic leukaemia	Weighted median	0.99812641271525	0.514319375698806	1.93703831283081	0.995576783330297
CAPN10	Acute Lymphoblastic Leukemia	Inverse variance weighted	4.3489382020087	1.43654866655817	13.1657659257761	0.00929600250456908			LRP1B	Acute lymphocytic leukaemia	Inverse variance weighted	0.917790867492656	0.480246623005476	1.75397397108468	0.795166439612199
CAPN10	Acute Lymphoblastic Leukemia	Simple mode	1.93311045921742	0.234980138872594	15.9031144736957	0.572996599322787			LRP1B	Acute lymphocytic leukaemia	Simple mode	0.928898794554562	0.235737751198385	3.66022398253382	0.925662828922934
CAPN10	Acute Lymphoblastic Leukemia	Weighted mode	7.24779523782068	1.75906407387554	29.8627756598096	0.051809087209588			LRP1B	Acute lymphocytic leukaemia	Weighted mode	1.01340610435554	0.510561898801406	2.01149348346604	0.973088021354673
CAPN12	Acute Lymphoblastic Leukemia	MR Egger	1.19013319759019	0.851457331749072	1.66352085441162	0.312677715813536			ATF6	Acute lymphocytic leukaemia	MR Egger	0.808304204897737	0.414250108408114	1.57720100585148	0.539350993565737
CAPN12	Acute Lymphoblastic Leukemia	Weighted median	1.13361450679041	0.825346991600929	1.55702009346757	0.438619080071815			ATF6	Acute lymphocytic leukaemia	Weighted median	1.0960841810952	0.598187802645918	2.00840024944184	0.766521153449931
CAPN12	Acute Lymphoblastic Leukemia	Inverse variance weighted	1.37244742100422	1.1165412109625	1.68700618027111	0.00263826388140593			ATF6	Acute lymphocytic leukaemia	Inverse variance weighted	0.77889665746218	0.483158661182375	1.25565378776633	0.305079584023752
CAPN12	Acute Lymphoblastic Leukemia	Simple mode	1.03848313731065	0.620916221538291	1.73686431288068	0.886085270338376			ATF6	Acute lymphocytic leukaemia	Simple mode	0.829908651472688	0.178969211676178	3.8484181906965	0.8139312711276
CAPN12	Acute Lymphoblastic Leukemia	Weighted mode	1.22964966154854	0.891535491817873	1.69599337774353	0.212748187931603			ATF6	Acute lymphocytic leukaemia	Weighted mode	1.10438105546817	0.605077336732291	2.01570516962961	0.749428886098883
CAPRIN2	Acute Lymphoblastic Leukemia	MR Egger	2.11345752162175	0.696448663037434	6.41354192025991	0.209196967285581			COL11A2	Acute lymphocytic leukaemia	MR Egger	0.621185839646219	0.00993447253681741	38.8417045743423	0.82601807403063
CAPRIN2	Acute Lymphoblastic Leukemia	Weighted median	2.2559372040526	1.05872993289044	4.80694132708094	0.035042894792524			COL11A2	Acute lymphocytic leukaemia	Weighted median	0.222490338211304	0.0463450682852092	1.06811689849595	0.0604264765507209
CAPRIN2	Acute Lymphoblastic Leukemia	Inverse variance weighted	2.03157395924411	1.15227037291917	3.58187874033652	0.0142904105298465			COL11A2	Acute lymphocytic leukaemia	Inverse variance weighted	0.599424407205864	0.15448965959204	2.32578426868781	0.459400340325739
CAPRIN2	Acute Lymphoblastic Leukemia	Simple mode	2.21190734845494	0.672653877603693	7.27347939415506	0.212237739514543			COL11A2	Acute lymphocytic leukaemia	Simple mode	0.140345762926678	0.00476443381072996	4.13416031241992	0.279421681735507
CAPRIN2	Acute Lymphoblastic Leukemia	Weighted mode	2.21190734845494	1.02827353310449	4.75800840986131	0.061653597851762			COL11A2	Acute lymphocytic leukaemia	Weighted mode	0.140345762926678	0.00508142323406231	3.87626305941944	0.270693617775991
CARD8	Acute Lymphoblastic Leukemia	MR Egger	1.48084388849728	1.13233373458406	1.9366186444187	0.00554392746354047			GAD1	Acute lymphocytic leukaemia	MR Egger	20.5585497240037	1.48506240916225e-09	284603504975.092	0.823383819146576
CARD8	Acute Lymphoblastic Leukemia	Weighted median	1.13444149870302	0.902203716866928	1.42646000001945	0.280423248698773			GAD1	Acute lymphocytic leukaemia	Weighted median	1.09865518777757	0.180623635312046	6.68264272029115	0.918643794169649
CARD8	Acute Lymphoblastic Leukemia	Inverse variance weighted	1.35791607929981	1.1609833858062	1.58825363133041	0.000129595672823574			GAD1	Acute lymphocytic leukaemia	Inverse variance weighted	1.09540451718955	0.183998924040862	6.52129387459239	0.920251948670906
CARD8	Acute Lymphoblastic Leukemia	Simple mode	1.24511882748523	0.765072662127972	2.02637078973143	0.380770291592521			GAD1	Acute lymphocytic leukaemia	Simple mode	0.523003302912449	0.0190520729001985	14.3570967993977	0.726892598376496
CARD8	Acute Lymphoblastic Leukemia	Weighted mode	1.29949854298264	1.02060602536838	1.65460169863731	0.0372366559978302			GAD1	Acute lymphocytic leukaemia	Weighted mode	1.08291888058999	0.170029103046008	6.89713279038443	0.938105822573615
CARM1	Acute Lymphoblastic Leukemia	MR Egger	0.339954125314739	0.067112452011174	1.72201735825816	0.228687526918284			GRB7	Acute lymphocytic leukaemia	MR Egger	2.03373090067849	0.29443811315514	14.0473029529137	0.498627702934809
CARM1	Acute Lymphoblastic Leukemia	Weighted median	0.417322948468654	0.207965264553702	0.837440058522845	0.0139231710947312			GRB7	Acute lymphocytic leukaemia	Weighted median	0.901347648744308	0.414456562235298	1.96022371926073	0.793301458990872
CARM1	Acute Lymphoblastic Leukemia	Inverse variance weighted	0.410451009917172	0.231837411028842	0.726673192192731	0.00224667340896136			GRB7	Acute lymphocytic leukaemia	Inverse variance weighted	0.807567554036134	0.364036127600547	1.79148525348429	0.599058188021632
CARM1	Acute Lymphoblastic Leukemia	Simple mode	0.398944332099851	0.155327125558485	1.02465412620199	0.0885474319608002			GRB7	Acute lymphocytic leukaemia	Simple mode	0.266260914263196	0.045167611841609	1.56959537096809	0.187149260906577
CARM1	Acute Lymphoblastic Leukemia	Weighted mode	0.398944332099851	0.185373693075472	0.858571556050283	0.0433091265799821			GRB7	Acute lymphocytic leukaemia	Weighted mode	0.947755001389719	0.416411032107799	2.15709833169524	0.901839627239909
CASP16	Acute Lymphoblastic Leukemia	MR Egger	4.15561101241791	0.0536620360059371	321.812293603962	0.636707563770649			DCAF5	Acute lymphocytic leukaemia	MR Egger	1.13329078799784	0.0345229360845192	37.2027456476014	0.948418478750059
CASP16	Acute Lymphoblastic Leukemia	Weighted median	3.92237816500663	1.01651580005866	15.1350824733201	0.0472806997877278			DCAF5	Acute lymphocytic leukaemia	Weighted median	1.05833568146963	0.372551177043388	3.00649812345472	0.915236666195658
CASP16	Acute Lymphoblastic Leukemia	Inverse variance weighted	3.92347704799932	1.11396363603129	13.818828234843	0.0333363602546634			DCAF5	Acute lymphocytic leukaemia	Inverse variance weighted	1.03706014249245	0.335077351191635	3.20968795808399	0.949662280447894
CASP16	Acute Lymphoblastic Leukemia	Simple mode	3.82360114053682	0.61476843117025	23.7811913244871	0.286954083151263			DCAF5	Acute lymphocytic leukaemia	Simple mode	0.565928361987883	0.0798219420132003	4.01236681073638	0.599366907280724
CASP16	Acute Lymphoblastic Leukemia	Weighted mode	3.97205433254285	0.947354727098748	16.6539683281993	0.199934337063442			DCAF5	Acute lymphocytic leukaemia	Weighted mode	1.01815620722759	0.311723866348768	3.32551393789088	0.977657446784679
CASP4	Acute Lymphoblastic Leukemia	MR Egger	3.34363671719768	0.171765624883983	65.0881484822347	0.461639636330638			CYB5A	Acute lymphocytic leukaemia	MR Egger	0.363111656474683	0.000292733267857896	450.410286581413	0.82693750086963
CASP4	Acute Lymphoblastic Leukemia	Weighted median	0.407800801196734	0.118772610429022	1.40016703224754	0.154101095149541			CYB5A	Acute lymphocytic leukaemia	Weighted median	1.26730701594769	0.193371728039858	8.30559404391938	0.804931298605883
CASP4	Acute Lymphoblastic Leukemia	Inverse variance weighted	0.328407685821383	0.109377062894753	0.98605324783986	0.047140253636343			CYB5A	Acute lymphocytic leukaemia	Inverse variance weighted	1.41093526997929	0.22351380581215	8.90655648244221	0.714216164686686
CASP4	Acute Lymphoblastic Leukemia	Simple mode	0.360048206506675	0.0458184342142707	2.82931342442726	0.368957302324831			CYB5A	Acute lymphocytic leukaemia	Simple mode	1.34329071463011	0.106950908648996	16.8715718903657	0.840435894099947
CASP4	Acute Lymphoblastic Leukemia	Weighted mode	0.486596459804782	0.110444584753392	2.14384539742927	0.377828368611243			CYB5A	Acute lymphocytic leukaemia	Weighted mode	1.18111879565784	0.118449344790718	11.7775375787942	0.900182914867385
CASP6	Acute Lymphoblastic Leukemia	MR Egger	3.99648506485322	0.167634720449651	95.2779521494891	0.454817065919332			NT5C2	Acute lymphocytic leukaemia	MR Egger	0.436025399891841	0.00800292317878419	23.7560882572064	0.723469931179125
CASP6	Acute Lymphoblastic Leukemia	Weighted median	3.80615277754307	0.953006361554858	15.2011566243516	0.0585081937681095			NT5C2	Acute lymphocytic leukaemia	Weighted median	0.513875021708666	0.0985902128830214	2.6784356196634	0.429307434726823
CASP6	Acute Lymphoblastic Leukemia	Inverse variance weighted	4.13518611424675	1.28293257525797	13.328653842951	0.0174427275304264			NT5C2	Acute lymphocytic leukaemia	Inverse variance weighted	0.555402900828049	0.127063838618615	2.42769607468021	0.434554418275588
CASP6	Acute Lymphoblastic Leukemia	Simple mode	3.14341655524191	0.578788482203122	17.0719838828811	0.255304503672248			NT5C2	Acute lymphocytic leukaemia	Simple mode	1.8635224925702	0.112145357571033	30.9662045360677	0.693533751282083
CASP6	Acute Lymphoblastic Leukemia	Weighted mode	3.35663144094936	0.615349705274646	18.309872473801	0.234372420740007			NT5C2	Acute lymphocytic leukaemia	Weighted mode	0.453989134556124	0.0845124142326167	2.43876756055886	0.425130244744001
CASP7	Acute Lymphoblastic Leukemia	MR Egger	0.877731656040312	0.610253533559876	1.2624471922696	0.484806103394008			SCARA3	Acute lymphocytic leukaemia	MR Egger	0.379229730228133	0.0742047750651446	1.93809	0.308766553832673
CASP7	Acute Lymphoblastic Leukemia	Weighted median	1.33801460536588	0.978636052353579	1.82936555409629	0.068050006903351			SCARA3	Acute lymphocytic leukaemia	Weighted median	1.38329865554567	0.629566499209874	3.03941707958728	0.419156590950948
CASP7	Acute Lymphoblastic Leukemia	Inverse variance weighted	1.23904396140114	1.01989920708247	1.50527613672367	0.0308953001983308			SCARA3	Acute lymphocytic leukaemia	Inverse variance weighted	1.68181266664748	0.823161867213465	3.43613323011524	0.153824432881279
CASP7	Acute Lymphoblastic Leukemia	Simple mode	1.3286635109784	0.77190754919215	2.28699243484921	0.309401272668992			SCARA3	Acute lymphocytic leukaemia	Simple mode	5.25014227958375	0.777032679581311	35.4734037321638	0.149646134259354
CASP7	Acute Lymphoblastic Leukemia	Weighted mode	1.27933741910279	0.935836697229448	1.74892076444754	0.128053561950393			SCARA3	Acute lymphocytic leukaemia	Weighted mode	1.0709014386358	0.461212625844908	2.48655354820634	0.879607347334168
CASP8	Acute Lymphoblastic Leukemia	MR Egger	1.9730179199797	0.6543306483857	5.94928530730594	0.244036812281854			LRRN1	Acute lymphocytic leukaemia	MR Egger	1.92851802295247	0.607861039500503	6.11847366942397	0.301696804299879
CASP8	Acute Lymphoblastic Leukemia	Weighted median	1.52424536440096	0.765772787543814	3.03395990127801	0.230085268567719			LRRN1	Acute lymphocytic leukaemia	Weighted median	2.6421674157588	1.59871343313659	4.36666666345644	0.000150360529125275
CASP8	Acute Lymphoblastic Leukemia	Inverse variance weighted	1.71121880407003	1.02147402900234	2.86670998210582	0.0412795665083117			LRRN1	Acute lymphocytic leukaemia	Inverse variance weighted	2.12021110851496	1.31543801776593	3.41733710289504	0.00203038878291674
CASP8	Acute Lymphoblastic Leukemia	Simple mode	1.6474228376234	0.58028072834515	4.67705004380025	0.360807465304308			LRRN1	Acute lymphocytic leukaemia	Simple mode	2.50986509841565	1.02610793561398	6.13914247576271	0.0784863406917978
CASP8	Acute Lymphoblastic Leukemia	Weighted mode	1.5319866464801	0.699300071248417	3.35618882578322	0.300476265632965			LRRN1	Acute lymphocytic leukaemia	Weighted mode	2.0162555044738	1.26830710894573	3.20528540023726	0.0180092079422079
CAST	Acute Lymphoblastic Leukemia	MR Egger	1.1258835438265	0.862780494114762	1.46921930074454	0.38685411864063			TNR	Acute lymphocytic leukaemia	MR Egger	0.231878258827051	0.0154961713457051	3.46972976209166	0.317293019583929
CAST	Acute Lymphoblastic Leukemia	Weighted median	1.28755699597663	0.989830012491918	1.67483607989901	0.0595904975658277			TNR	Acute lymphocytic leukaemia	Weighted median	0.980035498698473	0.399597969074568	2.40358974029203	0.964857670108884
CAST	Acute Lymphoblastic Leukemia	Inverse variance weighted	1.21638824825041	1.03293028721814	1.43243003791334	0.0188526101778517			TNR	Acute lymphocytic leukaemia	Inverse variance weighted	1.29844793250851	0.465266904631247	3.62365561928775	0.617942773540846
CAST	Acute Lymphoblastic Leukemia	Simple mode	1.37914626075397	0.88419207783481	2.15116653522767	0.162586171315062			TNR	Acute lymphocytic leukaemia	Simple mode	1.06338254474711	0.231179196806509	4.89136761479139	0.93864384946387
CAST	Acute Lymphoblastic Leukemia	Weighted mode	1.31608253935346	1.03495782214343	1.67356892554701	0.0295484111973351			TNR	Acute lymphocytic leukaemia	Weighted mode	0.833834015088356	0.321687215459315	2.16135155923318	0.716246161636325
CAV1	Acute Lymphoblastic Leukemia	MR Egger	2.68200542686723	1.22771273035919e-05	585898.714892433	0.900685329939484			WWP1	Acute lymphocytic leukaemia	MR Egger	0.193193054143503	0.000443023366105707	84.2473761539456	0.632718923990166
CAV1	Acute Lymphoblastic Leukemia	Weighted median	0.0966911815877149	0.00884423273630455	1.05709391369261	0.055556365092045			WWP1	Acute lymphocytic leukaemia	Weighted median	0.690345062961185	0.125319136837972	3.80290128052077	0.670360178124518
CAV1	Acute Lymphoblastic Leukemia	Inverse variance weighted	0.0859704110831528	0.0111645641851935	0.661997321096345	0.0184692761113411			WWP1	Acute lymphocytic leukaemia	Inverse variance weighted	0.540024251403212	0.127027890033615	2.29576506408496	0.404021763631026
CAV1	Acute Lymphoblastic Leukemia	Simple mode	0.0517174469555523	0.00173822813232672	1.53874757280572	0.229202972945524			WWP1	Acute lymphocytic leukaemia	Simple mode	1.53371631921997	0.106629035546435	22.0604616349293	0.768917232116775
CAV1	Acute Lymphoblastic Leukemia	Weighted mode	0.172556410581646	0.0107272965486094	2.77569606637578	0.340816503339302			WWP1	Acute lymphocytic leukaemia	Weighted mode	1.29424789836342	0.126774990719188	13.2129973973218	0.83839060491352
CAV2	Acute Lymphoblastic Leukemia	MR Egger	0.672170719026473	0.38744762461839	1.16612787589438	0.167878942076465			CREB3L4	Acute lymphocytic leukaemia	MR Egger	0.808277350766715	0.302016770278252	2.16316555918585	0.679218035893456
CAV2	Acute Lymphoblastic Leukemia	Weighted median	0.635616003326512	0.400303133261432	1.00925441275754	0.054737898193994			CREB3L4	Acute lymphocytic leukaemia	Weighted median	0.67132886569169	0.336538380949346	1.33917101710525	0.258028348827522
CAV2	Acute Lymphoblastic Leukemia	Inverse variance weighted	0.619625733416504	0.449415185503912	0.854301460867298	0.0034890797030464			CREB3L4	Acute lymphocytic leukaemia	Inverse variance weighted	0.664819308077505	0.402724690441365	1.0974860069003	0.110428204664453
CAV2	Acute Lymphoblastic Leukemia	Simple mode	0.624314591549338	0.295433460839547	1.31931132009825	0.226444428527891			CREB3L4	Acute lymphocytic leukaemia	Simple mode	0.365555804417236	0.107375494453617	1.24452089206311	0.131396020658776
CAV2	Acute Lymphoblastic Leukemia	Weighted mode	0.656813589830836	0.400469524723954	1.07724574568774	0.105942052765716			CREB3L4	Acute lymphocytic leukaemia	Weighted mode	0.939170105502755	0.4670707845493	1.88845142160022	0.862930840539978
CBLN3	Acute Lymphoblastic Leukemia	MR Egger	1.27103673918078	1.0054631654795	1.60675641616056	0.0493446410248454			RAG1	Acute lymphocytic leukaemia	MR Egger	2.72612002811197	0.398143401774758	18.6659640083087	0.493155063136741
CBLN3	Acute Lymphoblastic Leukemia	Weighted median	1.23771536479445	0.957652285450893	1.59968220983983	0.103227418420218			RAG1	Acute lymphocytic leukaemia	Weighted median	1.63370084265612	0.689111571787454	3.87307157877552	0.265052081128841
CBLN3	Acute Lymphoblastic Leukemia	Inverse variance weighted	1.30767151353106	1.11346445206383	1.53575157620083	0.00107447134338175			RAG1	Acute lymphocytic leukaemia	Inverse variance weighted	1.39259310805648	0.530825182932188	3.65339781713812	0.500956144892586
CBLN3	Acute Lymphoblastic Leukemia	Simple mode	1.46787994249883	0.910157468251164	2.36736125423493	0.120585937836541			RAG1	Acute lymphocytic leukaemia	Simple mode	1.3858355664638	0.262950732419208	7.30380250173339	0.737457868677872
CBLN3	Acute Lymphoblastic Leukemia	Weighted mode	1.25010912037329	1.00983193418832	1.54755733100935	0.0446154532494115			RAG1	Acute lymphocytic leukaemia	Weighted mode	1.74020608120971	0.742299442353354	4.07964364822694	0.330551654247627
CBWD1	Acute Lymphoblastic Leukemia	MR Egger	1.0128000931818	0.649143669376661	1.58018028541208	0.956159883996649			PMS2	Acute lymphocytic leukaemia	MR Egger	0.0445091119405645	0.000426595819869932	4.64388292961174	0.414505962395307
CBWD1	Acute Lymphoblastic Leukemia	Weighted median	1.24954257912972	0.940156437331827	1.66074133522853	0.124820830046814			PMS2	Acute lymphocytic leukaemia	Weighted median	1.14792755622199	0.3134634569579	4.20379998077661	0.834983745673583
CBWD1	Acute Lymphoblastic Leukemia	Inverse variance weighted	1.24770452735932	1.00365062966507	1.55110408102117	0.0462818882472426			PMS2	Acute lymphocytic leukaemia	Inverse variance weighted	1.56752366518049	0.413080729610055	5.94830565739627	0.508853487516841
CBWD1	Acute Lymphoblastic Leukemia	Simple mode	1.63225206049189	0.893649810458435	2.98130963359495	0.133221030075055			PMS2	Acute lymphocytic leukaemia	Simple mode	1.02134059171039	0.137718815249676	7.5743942640241	0.98539557712461
CBWD1	Acute Lymphoblastic Leukemia	Weighted mode	1.28868802451236	0.960983911616114	1.72814217225417	0.112354795529165			PMS2	Acute lymphocytic leukaemia	Weighted mode	1.03257337794311	0.257516539976323	4.14034679455879	0.968026783676552
CCDC102A	Acute Lymphoblastic Leukemia	MR Egger	0.220967045857907	0.0824836640905915	0.591952793240905	0.0132777879597561			PCBD1	Acute lymphocytic leukaemia	MR Egger	0.311830280838272	0.0252957901064738	3.8440437574152	0.389767608645395
CCDC102A	Acute Lymphoblastic Leukemia	Weighted median	0.529196291616766	0.259696295151401	1.07837008185916	0.0797301730675987			PCBD1	Acute lymphocytic leukaemia	Weighted median	2.00003953759466	0.5350210492545	7.47663696132271	0.302856026432358
CCDC102A	Acute Lymphoblastic Leukemia	Inverse variance weighted	0.463731175997679	0.267765300935022	0.803116023029342	0.00609742960995414			PCBD1	Acute lymphocytic leukaemia	Inverse variance weighted	1.15204265680547	0.347421466370504	3.82015048455304	0.816990962314911
CCDC102A	Acute Lymphoblastic Leukemia	Simple mode	0.534732009214938	0.172084292979427	1.66162	0.302331200024039			PCBD1	Acute lymphocytic leukaemia	Simple mode	0.9424385643498	0.107159858112043	8.28846233302262	0.95854476331497
CCDC102A	Acute Lymphoblastic Leukemia	Weighted mode	0.543824756037031	0.2479134267713	1.19293807169049	0.156764422153287			PCBD1	Acute lymphocytic leukaemia	Weighted mode	1.75055991639029	0.424495210033304	7.21906855116684	0.458430585140709
CCDC114	Acute Lymphoblastic Leukemia	MR Egger	11.4337748250949	1.84304681090272	70.9321141371028	0.034580057378494			PPM1D	Acute lymphocytic leukaemia	MR Egger	0.171769262301233	0.00263974549399091	11.1770924654191	0.468920198121923
CCDC114	Acute Lymphoblastic Leukemia	Weighted median	5.74520462409228	2.21964948255582	14.8705353850217	0.000314202995280029			PPM1D	Acute lymphocytic leukaemia	Weighted median	0.800031575359534	0.176101619690318	3.63455215629371	0.772653931543738
CCDC114	Acute Lymphoblastic Leukemia	Inverse variance weighted	3.95141915197896	1.77335003264399	8.80464264088163	0.000775420346243219			PPM1D	Acute lymphocytic leukaemia	Inverse variance weighted	0.805806257263016	0.228767851549994	2.83835215413705	0.736800291340848
CCDC114	Acute Lymphoblastic Leukemia	Simple mode	4.85030912478563	0.918126960010167	25.6233610716738	0.100020664177798			PPM1D	Acute lymphocytic leukaemia	Simple mode	0.519132479248047	0.0645873877114262	4.17261853373498	0.570893894614263
CCDC114	Acute Lymphoblastic Leukemia	Weighted mode	5.68286980607109	1.93836104751958	16.6609875255596	0.0132739901301499			PPM1D	Acute lymphocytic leukaemia	Weighted mode	0.838532809459966	0.145456049628537	4.83401875918177	0.85340810931989
CCDC132	Acute Lymphoblastic Leukemia	MR Egger	0.218533683168438	0.00895809785381323	5.33115081555338	0.449257912957585			CHFR	Acute lymphocytic leukaemia	MR Egger	0.309237396743969	0.0218982959812961	4.36690451287466	0.448876905419751
CCDC132	Acute Lymphoblastic Leukemia	Weighted median	0.100409307424506	0.0216766154047815	0.465110850065878	0.00329611120211853			CHFR	Acute lymphocytic leukaemia	Weighted median	1.06572928446933	0.309084298760376	3.67465740683269	0.919707939537301
CCDC132	Acute Lymphoblastic Leukemia	Inverse variance weighted	0.111112676128242	0.0278416350347059	0.443437563239004	0.00186058166021646			CHFR	Acute lymphocytic leukaemia	Inverse variance weighted	1.35842802093812	0.437979273264667	4.21327400795689	0.595811872980925
CCDC132	Acute Lymphoblastic Leukemia	Simple mode	0.112426522576028	0.0157971768058113	0.800125435950587	0.117051585206181			CHFR	Acute lymphocytic leukaemia	Simple mode	1.00209917434244	0.0977387488668397	10.2743565562308	0.998675626949973
CCDC132	Acute Lymphoblastic Leukemia	Weighted mode	0.110308799642637	0.0194184444790191	0.626622348239401	0.0886875682854703			CHFR	Acute lymphocytic leukaemia	Weighted mode	1.05762659532111	0.279806215205335	3.9976739412656	0.938148249551295
CCDC136	Acute Lymphoblastic Leukemia	MR Egger	2.24099429340692	0.555340810811964	9.04319532313791	0.283383182024331			BTG2	Acute lymphocytic leukaemia	MR Egger	0.773319090787669	0.0906927169102478	6.59394090893194	0.82346487630053
CCDC136	Acute Lymphoblastic Leukemia	Weighted median	1.95269841354169	0.890284472210936	4.28293563828981	0.0949209330532984			BTG2	Acute lymphocytic leukaemia	Weighted median	1.06351241626228	0.52904643411997	2.13791944638181	0.862772247431181
CCDC136	Acute Lymphoblastic Leukemia	Inverse variance weighted	2.04405975138332	1.08829682839282	3.8391918070693	0.026208515587788			BTG2	Acute lymphocytic leukaemia	Inverse variance weighted	1.26716381173109	0.568683354489432	2.82354690546989	0.562430032456343
CCDC136	Acute Lymphoblastic Leukemia	Simple mode	2.49471604932382	0.735305381182649	8.46397745212194	0.170456246576894			BTG2	Acute lymphocytic leukaemia	Simple mode	0.767137986403099	0.179018959816488	3.28736515275181	0.733274775060584
CCDC136	Acute Lymphoblastic Leukemia	Weighted mode	2.15975185162209	0.853234461608596	5.46687724238312	0.132438278824412			BTG2	Acute lymphocytic leukaemia	Weighted mode	1.00756057940163	0.487891351455033	2.08074670341378	0.984418452678378
CCDC144B	Acute Lymphoblastic Leukemia	MR Egger	3.5245813214399	0.973607176645802	12.7594308972133	0.127381402487858			CLK2	Acute lymphocytic leukaemia	MR Egger	1.17229333047095	0.292666005527889	4.69569962588536	0.827979740127483
CCDC144B	Acute Lymphoblastic Leukemia	Weighted median	2.77689	1.05758901035953	7.29122413369997	0.0381086456964839			CLK2	Acute lymphocytic leukaemia	Weighted median	0.910406125354004	0.492985526009886	1.68126500546685	0.764237960586809
CCDC144B	Acute Lymphoblastic Leukemia	Inverse variance weighted	2.31406930900002	1.05624810257206	5.06975279180727	0.0360149913140466			CLK2	Acute lymphocytic leukaemia	Inverse variance weighted	0.785574157501532	0.428157053257589	1.44135604502809	0.435753787452582
CCDC144B	Acute Lymphoblastic Leukemia	Simple mode	2.5377060690831	0.541341848888586	11.8962760892824	0.290557403123016			CLK2	Acute lymphocytic leukaemia	Simple mode	0.686522977829135	0.216737173638947	2.17458681025584	0.53850155726208
CCDC144B	Acute Lymphoblastic Leukemia	Weighted mode	3.01120071549231	1.04934309331323	8.64095814492088	0.095697577765017			CLK2	Acute lymphocytic leukaemia	Weighted mode	0.83341015561376	0.460230852930869	1.50918280045098	0.562349438507965
CCDC152	Acute Lymphoblastic Leukemia	MR Egger	1.00458600994867	0.565244566818055	1.78540955654941	0.987705013235885			CSNK2B	Acute lymphocytic leukaemia	MR Egger	4.62406315786718	0.0278614422810872	767.439096376535	0.662015656134359
CCDC152	Acute Lymphoblastic Leukemia	Weighted median	0.719295816350509	0.465250647965713	1.11205964716351	0.138289143257012			CSNK2B	Acute lymphocytic leukaemia	Weighted median	3.02478257004563	0.888028419955132	10.3029468319428	0.0767122938489778
CCDC152	Acute Lymphoblastic Leukemia	Inverse variance weighted	0.708480386445864	0.515035572005824	0.974582116772325	0.0341540699140449			CSNK2B	Acute lymphocytic leukaemia	Inverse variance weighted	4.24869117768083	1.20250156722889	15.0115203299913	0.0246816524751198
CCDC152	Acute Lymphoblastic Leukemia	Simple mode	0.543378710883003	0.232267460109137	1.27120873195986	0.173513309399325			CSNK2B	Acute lymphocytic leukaemia	Simple mode	3.2667819461549	0.361399318795388	29.5292872141955	0.402453169904082
CCDC152	Acute Lymphoblastic Leukemia	Weighted mode	0.721053274617069	0.44858477855635	1.15901798208404	0.190562015613889			CSNK2B	Acute lymphocytic leukaemia	Weighted mode	2.80094851179802	0.717075035127673	10.9407135675093	0.276636315721593
CCDC174	Acute Lymphoblastic Leukemia	MR Egger	1.38692918330156	0.582550071657811	3.30198664986763	0.48097933824632			ARHGAP25	Acute lymphocytic leukaemia	MR Egger	1.06658311913416	0.108331099422195	10.5011354642348	0.960967082909592
CCDC174	Acute Lymphoblastic Leukemia	Weighted median	1.97450158373023	0.981750929706158	3.97112585910161	0.0563476544080819			ARHGAP25	Acute lymphocytic leukaemia	Weighted median	0.589412248690321	0.179183189533312	1.93883589086126	0.384213325406811
CCDC174	Acute Lymphoblastic Leukemia	Inverse variance weighted	2.10109001946189	1.26387005622869	3.49290597409608	0.00419611482029415			ARHGAP25	Acute lymphocytic leukaemia	Inverse variance weighted	0.482076823047793	0.162371733122515	1.43127168042544	0.18878348659389
CCDC174	Acute Lymphoblastic Leukemia	Simple mode	3.47470623284424	1.15418041954289	10.4607418390864	0.0540024961269264			ARHGAP25	Acute lymphocytic leukaemia	Simple mode	0.534281441736687	0.0816263245131088	3.49711518541288	0.559809623391226
CCDC174	Acute Lymphoblastic Leukemia	Weighted mode	1.89130032397307	0.908168785818121	3.9387137846169	0.122839629769275			ARHGAP25	Acute lymphocytic leukaemia	Weighted mode	0.58258027808827	0.162281360061862	2.09142800065286	0.468134742501532
CCDC176	Acute Lymphoblastic Leukemia	MR Egger	0.0134115204290783	0.000291172723955162	0.617739456417225	0.0784485954197668			TALDO1	Acute lymphocytic leukaemia	MR Egger	3.98925300082818	0.120175873085127	132.423747762946	0.481981391801907
CCDC176	Acute Lymphoblastic Leukemia	Weighted median	0.554956339913119	0.20797242379449	1.48085276687497	0.239614455853754			TALDO1	Acute lymphocytic leukaemia	Weighted median	0.86579847035185	0.0970567897398713	7.72338538367773	0.897305513801062
CCDC176	Acute Lymphoblastic Leukemia	Inverse variance weighted	0.43660159139169	0.191961532529903	0.993016398095604	0.0480737542290416			TALDO1	Acute lymphocytic leukaemia	Inverse variance weighted	0.745778301250281	0.130954683920649	4.24715831434308	0.741026306788201
CCDC176	Acute Lymphoblastic Leukemia	Simple mode	0.763109657878838	0.143986769708736	4.04437401523723	0.761447643818109			TALDO1	Acute lymphocytic leukaemia	Simple mode	1.40997162998716	0.0568802668328299	34.950961169212	0.842136958297515
CCDC176	Acute Lymphoblastic Leukemia	Weighted mode	0.542905189817953	0.187106321245951	1.57528641025348	0.304013352643402			TALDO1	Acute lymphocytic leukaemia	Weighted mode	1.62384583868608	0.0871069037891395	30.2717143316355	0.758475155236042
CCDC24	Acute Lymphoblastic Leukemia	MR Egger	0.751208560173843	0.504980835555365	1.11749646946074	0.165751042116104			P4HA2	Acute lymphocytic leukaemia	MR Egger	0.461630486346072	0.0438290487607102	4.86213394882399	0.635993167100766
CCDC24	Acute Lymphoblastic Leukemia	Weighted median	0.727437795094664	0.508679723324132	1.04027292905285	0.081218363471064			P4HA2	Acute lymphocytic leukaemia	Weighted median	1.2571378631858	0.357469352354171	4.42106602047817	0.721342590581748
CCDC24	Acute Lymphoblastic Leukemia	Inverse variance weighted	0.752522749618178	0.592879520735473	0.955152723086831	0.0194302852760746			P4HA2	Acute lymphocytic leukaemia	Inverse variance weighted	1.53737066411803	0.449762281641813	5.25501727326478	0.492828553298846
CCDC24	Acute Lymphoblastic Leukemia	Simple mode	0.740924790296349	0.428179086224422	1.28210265876451	0.290087878062261			P4HA2	Acute lymphocytic leukaemia	Simple mode	1.45760492648553	0.215522757923052	9.8579479132011	0.736461252048504
CCDC24	Acute Lymphoblastic Leukemia	Weighted mode	0.691421087348321	0.499058734840775	0.957929571521197	0.0321249517518146			P4HA2	Acute lymphocytic leukaemia	Weighted mode	1.15403931173856	0.26745675041622	4.97952185153459	0.86542772536079
CCDC57	Acute Lymphoblastic Leukemia	MR Egger	0.68655170979675	0.35010329315707	1.34632623982024	0.285059585601087			NHEJ1	Acute lymphocytic leukaemia	MR Egger	2.57385810995983	0.0605695419716996	109.374206153009	0.67010121156911
CCDC57	Acute Lymphoblastic Leukemia	Weighted median	0.591667981092398	0.36992672330348	0.946325252535929	0.0285066706792482			NHEJ1	Acute lymphocytic leukaemia	Weighted median	0.823684574101302	0.0773292227606395	8.77360787282835	0.872327685509528
CCDC57	Acute Lymphoblastic Leukemia	Inverse variance weighted	0.621536631028655	0.456050151778284	0.847073029587017	0.00260619570119947			NHEJ1	Acute lymphocytic leukaemia	Inverse variance weighted	1.14226587647881	0.133305549297558	9.7878245837723	0.903401932169976
CCDC57	Acute Lymphoblastic Leukemia	Simple mode	0.697703021828679	0.328581804855562	1.48148649582971	0.358121505460601			NHEJ1	Acute lymphocytic leukaemia	Simple mode	0.58109559544287	0.0241625669921656	13.9750089943916	0.759975987220112
CCDC57	Acute Lymphoblastic Leukemia	Weighted mode	0.610587225869589	0.371141967952508	1.00451253856267	0.0639281558905188			NHEJ1	Acute lymphocytic leukaemia	Weighted mode	0.773074300901156	0.060743267709475	9.83884959189622	0.855474780272253
CCDC81	Acute Lymphoblastic Leukemia	MR Egger	0.0026698836731893	1.94716891506685e-06	3.66084255618781	0.35421047166572			PLCB1	Acute lymphocytic leukaemia	MR Egger	1.18930516270835e-07	9.12214335873864e-20	155056.406638221	0.463923971539659
CCDC81	Acute Lymphoblastic Leukemia	Weighted median	0.112400387624772	0.0129762020185438	0.97361671158822	0.0472253400270082			PLCB1	Acute lymphocytic leukaemia	Weighted median	0.960296804882313	0.0770264086058828	11.9721270945605	0.974893624559511
CCDC81	Acute Lymphoblastic Leukemia	Inverse variance weighted	0.103218588295683	0.0156097320471633	0.682527857465036	0.0184571315184953			PLCB1	Acute lymphocytic leukaemia	Inverse variance weighted	0.613109747878638	0.0818572181498836	4.59218589929985	0.633934245247611
CCDC81	Acute Lymphoblastic Leukemia	Simple mode	0.0549919119520247	0.00396374669653482	0.762942390537462	0.163177772719737			PLCB1	Acute lymphocytic leukaemia	Simple mode	1.4472639056376	0.0701081266417107	29.8763198062012	0.833136826905679
CCDC81	Acute Lymphoblastic Leukemia	Weighted mode	0.127341679873521	0.00895037759321436	1.81175634928566	0.267584975967614			PLCB1	Acute lymphocytic leukaemia	Weighted mode	1.42894156357778	0.065652842021372	31.101075433344	0.841435727560302
CCDC92	Acute Lymphoblastic Leukemia	MR Egger	2.40369248487764	0.967730316736472	5.97040049478022	0.074206434430988			GRB10	Acute lymphocytic leukaemia	MR Egger	0.0792917942020066	0.00166214439176155	3.78257668764274	0.28891418791776
CCDC92	Acute Lymphoblastic Leukemia	Weighted median	2.10837540187934	1.04835686181394	4.24020388206204	0.0363960859737156			GRB10	Acute lymphocytic leukaemia	Weighted median	0.41043191034632	0.108192729229347	1.55698404347893	0.190487518159031
CCDC92	Acute Lymphoblastic Leukemia	Inverse variance weighted	1.84204441696895	1.10369063014985	3.07434668864208	0.0194120554061268			GRB10	Acute lymphocytic leukaemia	Inverse variance weighted	0.462270186358666	0.148888157969399	1.43526340919603	0.1819186764061
CCDC92	Acute Lymphoblastic Leukemia	Simple mode	3.1998814450739	1.10358016927178	9.27820338533705	0.0447334673634005			GRB10	Acute lymphocytic leukaemia	Simple mode	0.575780450925045	0.0864032993146786	3.83692671804174	0.598887320585674
CCDC92	Acute Lymphoblastic Leukemia	Weighted mode	2.23441969496053	1.1311290125617	4.41384786154548	0.0313720991590524			GRB10	Acute lymphocytic leukaemia	Weighted mode	0.348893138159743	0.0638985953758253	1.90499370352367	0.290889674256764
CCHCR1	Acute Lymphoblastic Leukemia	MR Egger	0.55784638069521	0.299124316474717	1.04034532572362	0.0850716227575469			RRM1	Acute lymphocytic leukaemia	MR Egger	1.3395434230189	0.703958189634193	2.54898175570005	0.381324777164654
CCHCR1	Acute Lymphoblastic Leukemia	Weighted median	0.588036434326029	0.383360623445613	0.901988433206747	0.0149911708513824			RRM1	Acute lymphocytic leukaemia	Weighted median	1.0320974750233	0.577353480798058	1.84501390114951	0.915107359851493
CCHCR1	Acute Lymphoblastic Leukemia	Inverse variance weighted	0.716295669877632	0.51948967237178	0.987660609965414	0.041775069331241			RRM1	Acute lymphocytic leukaemia	Inverse variance weighted	1.01053980936515	0.670082486605153	1.52397760980954	0.960106941180571
CCHCR1	Acute Lymphoblastic Leukemia	Simple mode	0.595034380038959	0.306569773503995	1.15492766746534	0.14335633612688			RRM1	Acute lymphocytic leukaemia	Simple mode	0.743315221973998	0.25354251444042	2.17919081712069	0.593252439446409
CCHCR1	Acute Lymphoblastic Leukemia	Weighted mode	0.619082336943462	0.402771957058444	0.951563119524147	0.0430621181836275			RRM1	Acute lymphocytic leukaemia	Weighted mode	1.00975957897816	0.605966913314218	1.68262389403668	0.97053711822227
CCL3L3	Acute Lymphoblastic Leukemia	MR Egger	1.13871882267487	0.712528204214711	1.81983049855989	0.597915547825384			ADH5	Acute lymphocytic leukaemia	MR Egger	0.85097491229675	0.0660038973049764	10.9714476103196	0.906362713292732
CCL3L3	Acute Lymphoblastic Leukemia	Weighted median	1.40522170788693	1.06297314924092	1.85766503107514	0.0169021864507796			ADH5	Acute lymphocytic leukaemia	Weighted median	0.85914306662103	0.271541857406781	2.71828003230178	0.796140574149441
CCL3L3	Acute Lymphoblastic Leukemia	Inverse variance weighted	1.35259279909959	1.09437439859621	1.6717380107967	0.00519970700328116			ADH5	Acute lymphocytic leukaemia	Inverse variance weighted	0.917679562056555	0.347952610582739	2.42025998082305	0.862160714345105
CCL3L3	Acute Lymphoblastic Leukemia	Simple mode	1.33217901740462	0.794327189577873	2.23421904436667	0.298308437493536			ADH5	Acute lymphocytic leukaemia	Simple mode	0.936481222750397	0.199762621823696	4.39019608652357	0.936358092150545
CCL3L3	Acute Lymphoblastic Leukemia	Weighted mode	1.42209678985674	1.03444	1.95503450139976	0.0509315979130949			ADH5	Acute lymphocytic leukaemia	Weighted mode	0.824043665130496	0.243254486600722	2.7915125905007	0.766401228340099
CCL4L1	Acute Lymphoblastic Leukemia	MR Egger	0.942585895672392	0.636427244675469	1.39602472734111	0.771984216234997			INPP5E	Acute lymphocytic leukaemia	MR Egger	53.5178787589147	0.132733853403209	21578.2430285765	0.284388388982494
CCL4L1	Acute Lymphoblastic Leukemia	Weighted median	1.33710583526673	1.01802074793016	1.75620390678618	0.0367623323332138			INPP5E	Acute lymphocytic leukaemia	Weighted median	0.530573470122028	0.0681908044330074	4.12824294328265	0.544857021658067
CCL4L1	Acute Lymphoblastic Leukemia	Inverse variance weighted	1.27585236448826	1.06408372378064	1.52976614489205	0.00851936517382323			INPP5E	Acute lymphocytic leukaemia	Inverse variance weighted	1.77309277308119	0.228246505370471	13.7739588908487	0.583989408190468
CCL4L1	Acute Lymphoblastic Leukemia	Simple mode	1.46786453336117	0.882894917048737	2.44041079713304	0.158348301615326			INPP5E	Acute lymphocytic leukaemia	Simple mode	0.364876067784954	0.00838416523928151	15.8792844657269	0.628156212170234
CCL4L1	Acute Lymphoblastic Leukemia	Weighted mode	1.52765756297512	0.993041938862727	2.35008969750842	0.0717659950153334			INPP5E	Acute lymphocytic leukaemia	Weighted mode	0.329156396990701	0.00621584294145126	17.4302881685431	0.612404437758757
CCL5	Acute Lymphoblastic Leukemia	MR Egger	0.0697404826880744	0.00564315061349771	0.861882883992528	0.129513311917319			ZNF18	Acute lymphocytic leukaemia	MR Egger	2.91222217634857	0.380456147077268	22.2917623215428	0.379035541798864
CCL5	Acute Lymphoblastic Leukemia	Weighted median	0.280649292502584	0.0791026921767234	0.995718643889313	0.0492246511707919			ZNF18	Acute lymphocytic leukaemia	Weighted median	1.16440065562485	0.47621423436376	2.84709861441043	0.738635001650739
CCL5	Acute Lymphoblastic Leukemia	Inverse variance weighted	0.308445646226555	0.0985900583927556	0.964993004640595	0.0432554121366655			ZNF18	Acute lymphocytic leukaemia	Inverse variance weighted	1.20472784997654	0.500069553145922	2.90233465200704	0.678005701145604
CCL5	Acute Lymphoblastic Leukemia	Simple mode	0.418987732296266	0.064678181174572	2.71421856067567	0.413102824464159			ZNF18	Acute lymphocytic leukaemia	Simple mode	1.44010039463216	0.296929813974639	6.98444227899871	0.67421661082999
CCL5	Acute Lymphoblastic Leukemia	Weighted mode	0.281536774387944	0.0622348347593674	1.27361076219196	0.175123072891489			ZNF18	Acute lymphocytic leukaemia	Weighted mode	1.20541568034667	0.4548015072816	3.19485960174262	0.72623338237436
CCR5	Acute Lymphoblastic Leukemia	MR Egger	0.421354921374907	0.143620278126628	1.23617620076129	0.137832921891914			ADH7	Acute lymphocytic leukaemia	MR Egger	1.89087299282375	0.826777449816716	4.32450192706979	0.181954778504891
CCR5	Acute Lymphoblastic Leukemia	Weighted median	0.597935094627135	0.32547755363695	1.09846707827219	0.0974508423948035			ADH7	Acute lymphocytic leukaemia	Weighted median	1.50129949898756	0.796519069177376	2.82968766584341	0.208937680528459
CCR5	Acute Lymphoblastic Leukemia	Inverse variance weighted	0.546948689891875	0.343456560549929	0.871006420420233	0.011029724808754			ADH7	Acute lymphocytic leukaemia	Inverse variance weighted	1.25396146525979	0.672477841760469	2.33824708965884	0.476543977115392
CCR5	Acute Lymphoblastic Leukemia	Simple mode	0.532639084184474	0.210887781226098	1.34528606802833	0.202571493383411			ADH7	Acute lymphocytic leukaemia	Simple mode	1.70304666983074	0.410448967151496	7.06633026695143	0.487156370344224
CCR5	Acute Lymphoblastic Leukemia	Weighted mode	0.561162781994026	0.288963779689844	1.08976864932094	0.108595665053269			ADH7	Acute lymphocytic leukaemia	Weighted mode	1.53475354418921	0.777316665358783	3.03025593863233	0.25694890307714
CCT5	Acute Lymphoblastic Leukemia	MR Egger	1.80552404897656	0.844028657173459	3.86232986726987	0.155992722097439			SYK	Acute lymphocytic leukaemia	MR Egger	3.55590170513387	0.0231452356321754	546.30841256143	0.707957573381574
CCT5	Acute Lymphoblastic Leukemia	Weighted median	1.84188753582177	1.04086733719465	3.25934878863545	0.0359446520824072			SYK	Acute lymphocytic leukaemia	Weighted median	0.685985381650285	0.0816804635288747	5.76118111366416	0.728488386468261
CCT5	Acute Lymphoblastic Leukemia	Inverse variance weighted	2.02321921852193	1.30200166291417	3.14394068977954	0.00172753782248641			SYK	Acute lymphocytic leukaemia	Inverse variance weighted	0.637559977212479	0.0951075907852899	4.27392515346995	0.642879417401885
CCT5	Acute Lymphoblastic Leukemia	Simple mode	1.33813703638364	0.525534371327529	3.40721906279585	0.552697601571465			SYK	Acute lymphocytic leukaemia	Simple mode	1.5950333007845	0.0705893074950754	36.0413116503374	0.796784045799766
CCT5	Acute Lymphoblastic Leukemia	Weighted mode	1.78735265384893	1.03354767862032	3.09093578874399	0.0598265014957299			SYK	Acute lymphocytic leukaemia	Weighted mode	1.2139647338487	0.123583860884551	11.9247801814919	0.883189323063018
CCT6A	Acute Lymphoblastic Leukemia	MR Egger	0.647463462460286	0.22064286672259	1.8999432950086	0.440263272661675			RBM24	Acute lymphocytic leukaemia	MR Egger	0.919852170390214	0.172144321974973	4.91522465373327	0.925961869509069
CCT6A	Acute Lymphoblastic Leukemia	Weighted median	0.59227393930822	0.283331163021596	1.23808625723581	0.16382984706097			RBM24	Acute lymphocytic leukaemia	Weighted median	1.02263808618911	0.480422753483648	2.17680917013462	0.953687107169239
CCT6A	Acute Lymphoblastic Leukemia	Inverse variance weighted	0.370197250283096	0.213929268445473	0.640613624835051	0.00038282742330967			RBM24	Acute lymphocytic leukaemia	Inverse variance weighted	1.10590707898303	0.544540543991634	2.24598605345274	0.780635284431437
CCT6A	Acute Lymphoblastic Leukemia	Simple mode	0.446861696092878	0.122727851630335	1.62705834724842	0.238488585512076			RBM24	Acute lymphocytic leukaemia	Simple mode	0.812011001874943	0.164885616764722	3.99890469589475	0.806491441711901
CCT6A	Acute Lymphoblastic Leukemia	Weighted mode	0.577543412619753	0.272262620214555	1.22512739059667	0.170613257897018			RBM24	Acute lymphocytic leukaemia	Weighted mode	0.991644208731553	0.454652204810985	2.1628801670931	0.983858210544693
CCT6P1	Acute Lymphoblastic Leukemia	MR Egger	1.5853745315685	0.934304719001048	2.69014204277313	0.113328447126984			KRT7	Acute lymphocytic leukaemia	MR Egger	0.774369673848593	0.185549992086438	3.23173493587125	0.736065162746969
CCT6P1	Acute Lymphoblastic Leukemia	Weighted median	1.3496154595384	1.01675708786865	1.79144252875899	0.0379853647688231			KRT7	Acute lymphocytic leukaemia	Weighted median	1.02731959151613	0.437277022949974	2.41353990198935	0.950682869895631
CCT6P1	Acute Lymphoblastic Leukemia	Inverse variance weighted	1.25475136300811	1.00891345907231	1.56049160491758	0.0413741275592571			KRT7	Acute lymphocytic leukaemia	Inverse variance weighted	1.22101689044726	0.625404347036625	2.38386933800794	0.558555995848675
CCT6P1	Acute Lymphoblastic Leukemia	Simple mode	1.35305954818468	0.899746641525107	2.03476185010316	0.170065137782177			KRT7	Acute lymphocytic leukaemia	Simple mode	1.08753782265197	0.30421551366707	3.88783103610211	0.900458741357112
CCT6P1	Acute Lymphoblastic Leukemia	Weighted mode	1.38616433363613	1.04427845932103	1.83998007686013	0.0416434564401953			KRT7	Acute lymphocytic leukaemia	Weighted mode	1.04683793108965	0.412953627890987	2.65373538323134	0.92553556467513
CD164	Acute Lymphoblastic Leukemia	MR Egger	1.65257763512834	0.452217766152798	6.03915424057802	0.462070366808321			ATF6B	Acute lymphocytic leukaemia	MR Egger	0.464653300199266	0.0611198675529365	3.53244694450743	0.475967049574516
CD164	Acute Lymphoblastic Leukemia	Weighted median	2.06743160723337	0.987445129731992	4.32861869676512	0.0540434550326594			ATF6B	Acute lymphocytic leukaemia	Weighted median	0.528607453657605	0.163978704595623	1.70403736723894	0.28574647674243
CD164	Acute Lymphoblastic Leukemia	Inverse variance weighted	1.88609110803211	1.11605509716128	3.18742298372721	0.0177808529117171			ATF6B	Acute lymphocytic leukaemia	Inverse variance weighted	0.541823457770867	0.202100396184896	1.45260803507875	0.223241091155103
CD164	Acute Lymphoblastic Leukemia	Simple mode	3.00555876300312	0.789666018080139	11.4394988147358	0.130588565830985			ATF6B	Acute lymphocytic leukaemia	Simple mode	0.601946305802278	0.101365570348357	3.57458014416315	0.587713743250204
CD164	Acute Lymphoblastic Leukemia	Weighted mode	2.08030049276904	0.726328579863662	5.9582539641046	0.195591726111371			ATF6B	Acute lymphocytic leukaemia	Weighted mode	0.490995709481949	0.112787882916909	2.1374351614285	0.363574366518365
CD1A	Acute Lymphoblastic Leukemia	MR Egger	0.737288971719922	0.456917967023863	1.1896993925639	0.222987019595679			WFDC2	Acute lymphocytic leukaemia	MR Egger	3.84241912906274	0.000687597658045842	21472.1277634179	0.78866715478939
CD1A	Acute Lymphoblastic Leukemia	Weighted median	0.755366230785896	0.497185832697872	1.14761544896718	0.188591100215897			WFDC2	Acute lymphocytic leukaemia	Weighted median	0.620942984281129	0.0739870367221735	5.21132088551942	0.660639391780774
CD1A	Acute Lymphoblastic Leukemia	Inverse variance weighted	0.633002963999276	0.469138324500961	0.854103643862605	0.00277358078881757			WFDC2	Acute lymphocytic leukaemia	Inverse variance weighted	0.997528328355148	0.171036125921287	5.81785140718725	0.997805319130516
CD1A	Acute Lymphoblastic Leukemia	Simple mode	0.51088082700202	0.232206057807306	1.12399832227829	0.106585795326043			WFDC2	Acute lymphocytic leukaemia	Simple mode	0.379452002842748	0.0183710271342945	7.83754884301423	0.574986534074351
CD1A	Acute Lymphoblastic Leukemia	Weighted mode	0.697248880166767	0.466449831467441	1.04224713591251	0.0900378342301776			WFDC2	Acute lymphocytic leukaemia	Weighted mode	0.488977982912703	0.0304482314485263	7.85265535627518	0.648268827353439
CD1E	Acute Lymphoblastic Leukemia	MR Egger	0.39532800663194	0.170532595520929	0.916447863531184	0.0416437338994529			CA8	Acute lymphocytic leukaemia	MR Egger	1.64072364755209	0.37935548304129	7.09617814419107	0.536845681606957
CD1E	Acute Lymphoblastic Leukemia	Weighted median	0.535125807506308	0.279877948483812	1.02315895700458	0.0586555928479544			CA8	Acute lymphocytic leukaemia	Weighted median	1.27597239861221	0.809743104355234	2.01064455290001	0.293531480235842
CD1E	Acute Lymphoblastic Leukemia	Inverse variance weighted	0.578868593793824	0.368692394938847	0.908857501485537	0.0175384744522505			CA8	Acute lymphocytic leukaemia	Inverse variance weighted	1.33745533729175	0.775008474512315	2.3080867346332	0.296275044442788
CD1E	Acute Lymphoblastic Leukemia	Simple mode	0.379267542786475	0.129556495814565	1.11027909567094	0.0901358328698678			CA8	Acute lymphocytic leukaemia	Simple mode	1.3360603395113	0.591638348676682	3.01714254122927	0.511821543923572
CD1E	Acute Lymphoblastic Leukemia	Weighted mode	0.488140547443701	0.256634736808155	0.928483793823911	0.0392362985720692			CA8	Acute lymphocytic leukaemia	Weighted mode	1.27333241559881	0.812258255381715	1.99613291692893	0.332692838693756
CD22	Acute Lymphoblastic Leukemia	MR Egger	3.89090910589636	0.608536188795893	24.8780170334701	0.2245360591315			MVK	Acute lymphocytic leukaemia	MR Egger	0.438288466467919	0.137067451323566	1.40147626576444	0.236639109224971
CD22	Acute Lymphoblastic Leukemia	Weighted median	4.24371898829271	1.4742951350726	12.2154312411193	0.00737042472137423			MVK	Acute lymphocytic leukaemia	Weighted median	0.676980255762069	0.32137778625917	1.4260545883594	0.304748369142132
CD22	Acute Lymphoblastic Leukemia	Inverse variance weighted	4.07118357356008	1.63062877607474	10.1645058230382	0.00263459449793986			MVK	Acute lymphocytic leukaemia	Inverse variance weighted	0.76108109514372	0.391376045837917	1.48002014825672	0.421055808065602
CD22	Acute Lymphoblastic Leukemia	Simple mode	3.71619826543756	0.813839513437317	16.9691067096422	0.151011369702588			MVK	Acute lymphocytic leukaemia	Simple mode	0.663162872000775	0.169082120146343	2.60101419605855	0.581422901178261
CD22	Acute Lymphoblastic Leukemia	Weighted mode	4.09743948694326	1.23865967698459	13.5541752598529	0.0688510939816018			MVK	Acute lymphocytic leukaemia	Weighted mode	0.663162872000775	0.325893215836579	1.34947575901933	0.308548327910492
CD226	Acute Lymphoblastic Leukemia	MR Egger	1.23574922419306	0.500779512098548	3.04939820459997	0.650724198446621			DNAI1	Acute lymphocytic leukaemia	MR Egger	0.801143171137898	0.0291637747973319	22.0077951198419	0.903947057163348
CD226	Acute Lymphoblastic Leukemia	Weighted median	1.62717	0.954946981751804	2.77260931794079	0.073379865990487			DNAI1	Acute lymphocytic leukaemia	Weighted median	1.0481620209753	0.381335214202264	2.88104423955008	0.927348475199232
CD226	Acute Lymphoblastic Leukemia	Inverse variance weighted	1.68405648344366	1.09746049910976	2.58418981068492	0.0170477058872993			DNAI1	Acute lymphocytic leukaemia	Inverse variance weighted	1.07692417002543	0.386964197755911	2.99708777894879	0.887147872641978
CD226	Acute Lymphoblastic Leukemia	Simple mode	2.92319057478646	1.06648007394263	8.01237955148144	0.0488740416984445			DNAI1	Acute lymphocytic leukaemia	Simple mode	0.520077759101161	0.0799718308618106	3.38220186529266	0.531318310978376
CD226	Acute Lymphoblastic Leukemia	Weighted mode	1.63301945422763	0.952244378172121	2.80049176347449	0.0885285720835017			DNAI1	Acute lymphocytic leukaemia	Weighted mode	0.969657604858186	0.322329278506467	2.91700423559398	0.95890056107269
CD247	Acute Lymphoblastic Leukemia	MR Egger	1.70505936658869	0.780074454247816	3.72685892706885	0.200997071534873			RNF146	Acute lymphocytic leukaemia	MR Egger	1.12252622838368	0.0867616214828839	14.5233008774261	0.93506619119782
CD247	Acute Lymphoblastic Leukemia	Weighted median	2.37857509418946	1.21594744180062	4.65284870398707	0.0113690634997692			RNF146	Acute lymphocytic leukaemia	Weighted median	1.30267911222596	0.353600936877291	4.7991187026145	0.69104097490382
CD247	Acute Lymphoblastic Leukemia	Inverse variance weighted	2.18126731225844	1.37326241825705	3.46468892199492	0.000954632505075633			RNF146	Acute lymphocytic leukaemia	Inverse variance weighted	1.70616425841935	0.56774683737715	5.12727907064308	0.341274985493985
CD247	Acute Lymphoblastic Leukemia	Simple mode	1.8179584420451	0.577634225153795	5.72156695895766	0.322078981767654			RNF146	Acute lymphocytic leukaemia	Simple mode	1.43208356532742	0.240671621317229	8.52141738546592	0.713218186626175
CD247	Acute Lymphoblastic Leukemia	Weighted mode	1.98009426314772	1.00536475518932	3.89985154215218	0.0657241884097593			RNF146	Acute lymphocytic leukaemia	Weighted mode	1.57644651074892	0.359050850127719	6.9215366023181	0.579019942566847
CD27-AS1	Acute Lymphoblastic Leukemia	MR Egger	0.980457195331583	0.725648220902071	1.32474149896277	0.898461222847809			CARD9	Acute lymphocytic leukaemia	MR Egger	0.097434033492187	0.000358947401776213	26.4478607048821	0.564874143035669
CD27-AS1	Acute Lymphoblastic Leukemia	Weighted median	0.764568350475286	0.594901159920418	0.982625017283038	0.0360010632122634			CARD9	Acute lymphocytic leukaemia	Weighted median	0.899822481703599	0.283097335360236	2.86007813372359	0.858008019115436
CD27-AS1	Acute Lymphoblastic Leukemia	Inverse variance weighted	0.801975594100419	0.675470982878537	0.952172439431605	0.0117502865304425			CARD9	Acute lymphocytic leukaemia	Inverse variance weighted	0.949917612445895	0.250190890983576	3.60661999678536	0.939830948993626
CD27-AS1	Acute Lymphoblastic Leukemia	Simple mode	0.80928325992388	0.534228258066113	1.22595423380238	0.32464912431282			CARD9	Acute lymphocytic leukaemia	Simple mode	0.814193751176399	0.162470332856657	4.08020007590901	0.825936662291194
CD27-AS1	Acute Lymphoblastic Leukemia	Weighted mode	0.781369760415352	0.611239140652855	0.998854068539259	0.0566697858063402			CARD9	Acute lymphocytic leukaemia	Weighted mode	0.916441372169865	0.256495664793629	3.27438200290957	0.905456346800952
CD300C	Acute Lymphoblastic Leukemia	MR Egger	0.772172114415996	0.602275140427111	0.989995658560358	0.0463257029542463			FBXL4	Acute lymphocytic leukaemia	MR Egger	2.05385502710023	0.208373197063372	20.2440646484009	0.554695889547813
CD300C	Acute Lymphoblastic Leukemia	Weighted median	0.858587790920674	0.672448194854866	1.09625247023995	0.221365201420932			FBXL4	Acute lymphocytic leukaemia	Weighted median	3.4541541207276	1.15957902770871	10.2892346313947	0.0260235527151945
CD300C	Acute Lymphoblastic Leukemia	Inverse variance weighted	0.809608334733146	0.693875855085813	0.944643989072534	0.00728403030312321			FBXL4	Acute lymphocytic leukaemia	Inverse variance weighted	1.36707615871893	0.498137379874424	3.75177069468034	0.543822972379933
CD300C	Acute Lymphoblastic Leukemia	Simple mode	0.830821764858284	0.556029365685267	1.24141789545869	0.369643387509425			FBXL4	Acute lymphocytic leukaemia	Simple mode	0.626560959192479	0.0797620194715704	4.92187432295551	0.667138746020365
CD300C	Acute Lymphoblastic Leukemia	Weighted mode	0.867183739849698	0.685387283338685	1.09720103792486	0.240251324962437			FBXL4	Acute lymphocytic leukaemia	Weighted mode	3.04861082547411	0.712576164918629	13.0428555188332	0.167073208339879
CD300LB	Acute Lymphoblastic Leukemia	MR Egger	1.71740882715437	0.98825750692549	2.9845390082224	0.064349128556396			EHD4	Acute lymphocytic leukaemia	MR Egger	1.61789426566229	0.0145148541585491	180.33814368856	0.874299764250186
CD300LB	Acute Lymphoblastic Leukemia	Weighted median	1.40674434945589	0.867282210070402	2.28175977985925	0.166670640056114			EHD4	Acute lymphocytic leukaemia	Weighted median	0.6258377072832	0.195104436910191	2.00750347895873	0.430634670492569
CD300LB	Acute Lymphoblastic Leukemia	Inverse variance weighted	1.5731135481073	1.13697582030873	2.17655133120315	0.00623929702458974			EHD4	Acute lymphocytic leukaemia	Inverse variance weighted	0.690170961848841	0.164366899674447	2.89800414513388	0.612479428825629
CD300LB	Acute Lymphoblastic Leukemia	Simple mode	1.3872198761713	0.649707677788689	2.96191510525845	0.403986153442143			EHD4	Acute lymphocytic leukaemia	Simple mode	0.374768514212576	0.0567214715598723	2.47616000400921	0.415484827920403
CD300LB	Acute Lymphoblastic Leukemia	Weighted mode	1.41555800156421	0.855809098040192	2.34141522961274	0.185365887125883			EHD4	Acute lymphocytic leukaemia	Weighted mode	0.603836761380562	0.174341733231788	2.09140306016004	0.509553449814243
CD300LD	Acute Lymphoblastic Leukemia	MR Egger	1.26229160199379	0.833920715658628	1.91070932589269	0.283228177968722			FAH	Acute lymphocytic leukaemia	MR Egger	1.07566975789615	0.686452121329738	1.68557338829544	0.761043714638259
CD300LD	Acute Lymphoblastic Leukemia	Weighted median	1.32712486690237	0.938034160307497	1.87760796661528	0.109896142046778			FAH	Acute lymphocytic leukaemia	Weighted median	1.0208618981472	0.688741095811198	1.51313609922065	0.918095424306296
CD300LD	Acute Lymphoblastic Leukemia	Inverse variance weighted	1.39149567238295	1.06144918723189	1.8241666483442	0.0167697596260534			FAH	Acute lymphocytic leukaemia	Inverse variance weighted	0.95649828657279	0.647969297164969	1.41193259652819	0.82287735158844
CD300LD	Acute Lymphoblastic Leukemia	Simple mode	1.34992035163484	0.66678584021746	2.73294	0.413368424500353			FAH	Acute lymphocytic leukaemia	Simple mode	0.392193580919029	0.0660816444439191	2.32766309326077	0.337212603047323
CD300LD	Acute Lymphoblastic Leukemia	Weighted mode	1.28922960417176	0.897284602578625	1.85238102548096	0.183319582942069			FAH	Acute lymphocytic leukaemia	Weighted mode	1.04675458265812	0.69399559648295	1.5788214822523	0.833708629975133
CD300LF	Acute Lymphoblastic Leukemia	MR Egger	1.1721365584092	0.626481976502005	2.19304650906421	0.625258957942321			RUFY1	Acute lymphocytic leukaemia	MR Egger	0.246401077763841	0.00521028370074305	11.6526267301959	0.508319846004573
CD300LF	Acute Lymphoblastic Leukemia	Weighted median	1.23117512467575	0.734907498935485	2.06256187318264	0.429532928541031			RUFY1	Acute lymphocytic leukaemia	Weighted median	0.816430417516576	0.205646003278366	3.24129142322317	0.773111112517786
CD300LF	Acute Lymphoblastic Leukemia	Inverse variance weighted	1.57528742725424	1.07849363053262	2.30092270200961	0.0187271758457921			RUFY1	Acute lymphocytic leukaemia	Inverse variance weighted	0.812367441021556	0.27496336004476	2.40010472349655	0.706939849927803
CD300LF	Acute Lymphoblastic Leukemia	Simple mode	1.37669210556519	0.50835123378706	3.72829065330729	0.536884956796526			RUFY1	Acute lymphocytic leukaemia	Simple mode	0.848071700363357	0.104732005511844	6.86729529757603	0.882338404150245
CD300LF	Acute Lymphoblastic Leukemia	Weighted mode	1.32288993630848	0.810194218236524	2.16002255285824	0.277258700002376			RUFY1	Acute lymphocytic leukaemia	Weighted mode	0.944828706029541	0.152387778422921	5.85808975612171	0.953367940405915
CD38	Acute Lymphoblastic Leukemia	MR Egger	0.013079001040964	7.74043070480784e-06	22.099580081931	0.457400077354933			HNRNPC	Acute lymphocytic leukaemia	MR Egger	0.329375218267002	0.00868466892320534	12.491902151682	0.581621473183913
CD38	Acute Lymphoblastic Leukemia	Weighted median	0.0557266048541456	0.00539622133978092	0.575486862571165	0.0153569766559868			HNRNPC	Acute lymphocytic leukaemia	Weighted median	0.96323726256101	0.339839377496886	2.73018986445892	0.94382317476595
CD38	Acute Lymphoblastic Leukemia	Inverse variance weighted	0.050162347456576	0.00740292234356676	0.339901053337526	0.00217388073964965			HNRNPC	Acute lymphocytic leukaemia	Inverse variance weighted	1.19756804314047	0.388536173732343	3.69121156512771	0.75357758294976
CD38	Acute Lymphoblastic Leukemia	Simple mode	0.118814388721567	0.0050492817269177	2.79581527250156	0.317121406042949			HNRNPC	Acute lymphocytic leukaemia	Simple mode	0.441600327860071	0.0975996626610878	1.99806888926749	0.337120382678935
CD38	Acute Lymphoblastic Leukemia	Weighted mode	0.0255175907585851	0.00105811171610216	0.615386285033591	0.152399338821838			HNRNPC	Acute lymphocytic leukaemia	Weighted mode	0.913604461273183	0.32884774984876	2.53817492150132	0.869196629480603
CD44	Acute Lymphoblastic Leukemia	MR Egger	0.951065208473694	0.208613780803061	4.33588340754447	0.949073406945301			DTX1	Acute lymphocytic leukaemia	MR Egger	4.43244766195595	0.482249933584175	40.7394400865159	0.224755058477163
CD44	Acute Lymphoblastic Leukemia	Weighted median	1.55208238660548	0.716985214882321	3.35984576084507	0.264573460271183			DTX1	Acute lymphocytic leukaemia	Weighted median	1.03724954157558	0.383059061591853	2.80867030537736	0.942633709475248
CD44	Acute Lymphoblastic Leukemia	Inverse variance weighted	1.90764220678448	1.0554461652812	3.44792459228461	0.0324606164705929			DTX1	Acute lymphocytic leukaemia	Inverse variance weighted	0.898622049745605	0.376036017044153	2.14745809360643	0.80995016784776
CD44	Acute Lymphoblastic Leukemia	Simple mode	1.04975884294583	0.266806919018525	4.13030378821044	0.945370488712511			DTX1	Acute lymphocytic leukaemia	Simple mode	1.08732678887894	0.221624099203765	5.33461636194529	0.920088345868814
CD44	Acute Lymphoblastic Leukemia	Weighted mode	1.19117993680793	0.365241909156544	3.88484893513577	0.775085689094974			DTX1	Acute lymphocytic leukaemia	Weighted mode	1.08732678887894	0.386467418956991	3.05919590584004	0.877459964942067
CD47	Acute Lymphoblastic Leukemia	MR Egger	1.43985145441565	0.880898664134909	2.35347412272309	0.153518867679493			RECQL	Acute lymphocytic leukaemia	MR Egger	0.835352553999458	0.22717224770102	3.07173916063817	0.792661097021168
CD47	Acute Lymphoblastic Leukemia	Weighted median	1.31150872231363	0.830796071269361	2.07036983946817	0.24434761318882			RECQL	Acute lymphocytic leukaemia	Weighted median	0.606491471601045	0.318614844488828	1.15447196352366	0.127852070048876
CD47	Acute Lymphoblastic Leukemia	Inverse variance weighted	1.76658901223955	1.3087672004806	2.38456215667654	0.000200622369992452			RECQL	Acute lymphocytic leukaemia	Inverse variance weighted	0.853270790552211	0.419498657730604	1.73557418740813	0.661363582839667
CD47	Acute Lymphoblastic Leukemia	Simple mode	1.5262849901656	0.61185668247952	3.80733910066069	0.369766280402188			RECQL	Acute lymphocytic leukaemia	Simple mode	0.583451932165323	0.256892559872149	1.32513046433446	0.226962300287174
CD47	Acute Lymphoblastic Leukemia	Weighted mode	1.42991912058454	0.927585020083437	2.20429248763563	0.112810582324367			RECQL	Acute lymphocytic leukaemia	Weighted mode	0.624373430342443	0.313581630310622	1.2431920203088	0.209747212322715
CD55	Acute Lymphoblastic Leukemia	MR Egger	0.95315201775001	0.71607009607754	1.26872882126687	0.743217367531576			PQBP1	Acute lymphocytic leukaemia	MR Egger	10.0459019170973	3.77644355371725e-05	2672359.42739303	0.778877499136749
CD55	Acute Lymphoblastic Leukemia	Weighted median	0.873150976376989	0.642426850497561	1.18673842314905	0.386256371943206			PQBP1	Acute lymphocytic leukaemia	Weighted median	1.22030479623742	0.195061650221337	7.63422125276963	0.831457471094011
CD55	Acute Lymphoblastic Leukemia	Inverse variance weighted	0.826586436364136	0.687872948694641	0.993272286804909	0.0421512035153397			PQBP1	Acute lymphocytic leukaemia	Inverse variance weighted	1.21299810764512	0.0871902849264799	16.8753251625603	0.885695650611923
CD55	Acute Lymphoblastic Leukemia	Simple mode	0.672858483792398	0.382922421236477	1.18232444511734	0.172404774421453			PQBP1	Acute lymphocytic leukaemia	Simple mode	0.943855665896001	0.0496024393259358	17.9600747493516	0.972826192519997
CD55	Acute Lymphoblastic Leukemia	Weighted mode	0.831689280485954	0.62635684023571	1.10433384748372	0.206606357431438			PQBP1	Acute lymphocytic leukaemia	Weighted mode	1.11244315131344	0.132357506764735	9.34990236030874	0.930792873051347
CD6	Acute Lymphoblastic Leukemia	MR Egger	0.427166129339274	0.145147972167167	1.2571371086366	0.140883003194961			TCTN2	Acute lymphocytic leukaemia	MR Egger	0.00321557728248131	1.3584680188217e-05	0.761146903449258	0.287968163732325
CD6	Acute Lymphoblastic Leukemia	Weighted median	0.480596566271621	0.237569770687817	0.972232531282727	0.041516173319906			TCTN2	Acute lymphocytic leukaemia	Weighted median	1.62956701645424	0.777432385853461	3.41571654260377	0.195926113123657
CD6	Acute Lymphoblastic Leukemia	Inverse variance weighted	0.539389573635497	0.335711317666329	0.866640761977099	0.0107224662837559			TCTN2	Acute lymphocytic leukaemia	Inverse variance weighted	1.85166976366002	0.592545581144452	5.78635808409968	0.28924367119214
CD6	Acute Lymphoblastic Leukemia	Simple mode	1.03226989957789	0.255857105862957	4.16475103155939	0.964896047651586			TCTN2	Acute lymphocytic leukaemia	Simple mode	1.19443837919461	0.430176077535387	3.3165094857598	0.765592372969054
CD6	Acute Lymphoblastic Leukemia	Weighted mode	0.429150254056844	0.210333772263139	0.87560803277301	0.0319592518744986			TCTN2	Acute lymphocytic leukaemia	Weighted mode	1.58974585096885	0.725865368767328	3.48176394606696	0.366138824013456
CD69	Acute Lymphoblastic Leukemia	MR Egger	2.23894101767536	0.180176202430221	27.821969899552	0.558211734928794			RHPN2	Acute lymphocytic leukaemia	MR Egger	2.70153609785175	0.474362299011138	15.3854918555083	0.313713752385129
CD69	Acute Lymphoblastic Leukemia	Weighted median	0.41564726162227	0.115869027886291	1.49101661803561	0.177956595978413			RHPN2	Acute lymphocytic leukaemia	Weighted median	1.10896030542957	0.449930767465864	2.73329375971547	0.822203581738299
CD69	Acute Lymphoblastic Leukemia	Inverse variance weighted	0.34429985242626	0.124240136563786	0.954139231164511	0.0403379363274126			RHPN2	Acute lymphocytic leukaemia	Inverse variance weighted	1.03917178954473	0.415229075051134	2.60068013795182	0.93456999481373
CD69	Acute Lymphoblastic Leukemia	Simple mode	0.102845868336851	0.0127709524922664	0.828228954760122	0.0764583785345223			RHPN2	Acute lymphocytic leukaemia	Simple mode	1.3181736953524	0.241399949341617	7.19793809343377	0.760570965269931
CD69	Acute Lymphoblastic Leukemia	Weighted mode	0.376943750605963	0.0935880469152112	1.51821301762625	0.218973494349234			RHPN2	Acute lymphocytic leukaemia	Weighted mode	1.13031497168529	0.442326311982501	2.88839234882879	0.806570257582304
CD86	Acute Lymphoblastic Leukemia	MR Egger	0.686003716693837	0.27129995194298	1.73461549088908	0.436249750537934			SOCS3	Acute lymphocytic leukaemia	MR Egger	2.62057328792434	0.889631464966963	7.71938114580693	0.123985268146167
CD86	Acute Lymphoblastic Leukemia	Weighted median	0.510520976286519	0.261041058642949	0.998431697233619	0.049462137656191			SOCS3	Acute lymphocytic leukaemia	Weighted median	2.15261423234506	1.08751149672789	4.26087268708105	0.0277489031923646
CD86	Acute Lymphoblastic Leukemia	Inverse variance weighted	0.391923095291025	0.243189387736918	0.631621774502209	0.000119545720411328			SOCS3	Acute lymphocytic leukaemia	Inverse variance weighted	2.21998917159673	1.19436797350037	4.12632625066385	0.0116821334414439
CD86	Acute Lymphoblastic Leukemia	Simple mode	0.299553190773896	0.0952437409034249	0.942131349017556	0.0531583690012865			SOCS3	Acute lymphocytic leukaemia	Simple mode	2.18637372694976	0.58425968327647	8.18168737416405	0.278796647435679
CD86	Acute Lymphoblastic Leukemia	Weighted mode	0.566893648219857	0.273982052772126	1.1729542323683	0.142500604700816			SOCS3	Acute lymphocytic leukaemia	Weighted mode	2.16697572732123	1.02221334357943	4.59374144574987	0.0783847002329057
CD93	Acute Lymphoblastic Leukemia	MR Egger	0.842180887316544	0.623199550632181	1.13810840563314	0.268720551575098			PYGL	Acute lymphocytic leukaemia	MR Egger	0.783706061406936	0.103073799330766	5.95879064004429	0.82057641806805
CD93	Acute Lymphoblastic Leukemia	Weighted median	0.727387414887257	0.519865229085164	1.01774925833651	0.063263214719954			PYGL	Acute lymphocytic leukaemia	Weighted median	1.18852240021503	0.380345400775784	3.71395445542833	0.766389097013543
CD93	Acute Lymphoblastic Leukemia	Inverse variance weighted	0.788563754497703	0.640905355857437	0.970241220836099	0.0247300034984469			PYGL	Acute lymphocytic leukaemia	Inverse variance weighted	1.50455408681686	0.588355871197495	3.84747244138144	0.393804241405636
CD93	Acute Lymphoblastic Leukemia	Simple mode	0.588060758834723	0.317192357787499	1.09023892786517	0.0977351503649166			PYGL	Acute lymphocytic leukaemia	Simple mode	2.18083569818533	0.436332899521108	10.9000360681018	0.370037210278522
CD93	Acute Lymphoblastic Leukemia	Weighted mode	0.750196690291813	0.551883005360968	1.01977243121789	0.0721206867491531			PYGL	Acute lymphocytic leukaemia	Weighted mode	1.24100948266948	0.408890803818672	3.76654236703878	0.712983902200872
CDADC1	Acute Lymphoblastic Leukemia	MR Egger	6.03464092024482	0.279634050839897	130.230531392414	0.303313021135528			POLR3F	Acute lymphocytic leukaemia	MR Egger	16.034827354569	2.8860875204565e-05	8908797.34132824	0.75166934415973
CDADC1	Acute Lymphoblastic Leukemia	Weighted median	4.73646976776282	1.54534800861709	14.517212780445	0.00649555667538447			POLR3F	Acute lymphocytic leukaemia	Weighted median	3.14096316435199	0.281906374911504	34.9961919197929	0.352088140562957
CDADC1	Acute Lymphoblastic Leukemia	Inverse variance weighted	3.71024221831786	1.27382287608878	10.8067593831066	0.0162294337810276			POLR3F	Acute lymphocytic leukaemia	Inverse variance weighted	3.31646135076781	0.453121825223128	24.2736396237822	0.237788581278631
CDADC1	Acute Lymphoblastic Leukemia	Simple mode	5.41031973161282	0.696144354148182	42.0481174972629	0.157700213629257			POLR3F	Acute lymphocytic leukaemia	Simple mode	2.92043496380714	0.13998995878683	60.9253724462816	0.560756068451425
CDADC1	Acute Lymphoblastic Leukemia	Weighted mode	4.84454235778753	1.38158060472203	16.9874928586737	0.0487904747505646			POLR3F	Acute lymphocytic leukaemia	Weighted mode	1.68298537117525	0.0882822299075485	32.0839172566904	0.762266363016681
CDC25B	Acute Lymphoblastic Leukemia	MR Egger	1.5775544907623	0.911783942099598	2.72946040878229	0.115675031219434			GALK1	Acute lymphocytic leukaemia	MR Egger	1.04350406187946	0.0165528886525599	65.7831240223162	0.987178736998819
CDC25B	Acute Lymphoblastic Leukemia	Weighted median	1.71626986996649	1.1030557911628	2.67038375588388	0.0166259769338745			GALK1	Acute lymphocytic leukaemia	Weighted median	1.12223662247704	0.203370178729125	6.19272227963241	0.894719571418504
CDC25B	Acute Lymphoblastic Leukemia	Inverse variance weighted	1.47976978761032	1.07784762942435	2.0315660252403	0.0153662818185149			GALK1	Acute lymphocytic leukaemia	Inverse variance weighted	1.27082661731199	0.126093273029044	12.8079813654821	0.838885698013643
CDC25B	Acute Lymphoblastic Leukemia	Simple mode	2.2758428260965	1.00269277643531	5.16555089536844	0.0600095723058893			GALK1	Acute lymphocytic leukaemia	Simple mode	0.503869392747434	0.032289051422157	7.86286229435192	0.673233366006632
CDC25B	Acute Lymphoblastic Leukemia	Weighted mode	1.65841804935598	1.08156974170926	2.54292471429829	0.0284838123114628			GALK1	Acute lymphocytic leukaemia	Weighted mode	0.999026988309593	0.148763222268714	6.70901657109935	0.999291554698613
CDC42	Acute Lymphoblastic Leukemia	MR Egger	0.842946138894714	0.488686736025545	1.45401571333085	0.542625877973454			EIF3G	Acute lymphocytic leukaemia	MR Egger	0.50870769427313	0.0161741970875933	15.9997752476498	0.726477597549792
CDC42	Acute Lymphoblastic Leukemia	Weighted median	0.73775892789556	0.482538299177033	1.12796898529689	0.160295688067735			EIF3G	Acute lymphocytic leukaemia	Weighted median	0.996868468603029	0.232604733395609	4.27225503620688	0.996629561034385
CDC42	Acute Lymphoblastic Leukemia	Inverse variance weighted	0.720144623444818	0.5399226147284	0.960523350068153	0.0254776581276327			EIF3G	Acute lymphocytic leukaemia	Inverse variance weighted	0.828621893190069	0.235034547454425	2.92133326487688	0.769962721675561
CDC42	Acute Lymphoblastic Leukemia	Simple mode	0.760106060205725	0.387517958505865	1.49092760755944	0.429571307456606			EIF3G	Acute lymphocytic leukaemia	Simple mode	2.04038540653116	0.268894958426881	15.4825238507304	0.528303283602775
CDC42	Acute Lymphoblastic Leukemia	Weighted mode	0.711954254850422	0.459722860386206	1.10257484383917	0.135769646345821			EIF3G	Acute lymphocytic leukaemia	Weighted mode	0.904561163124382	0.173422675384833	4.71813098268288	0.91099250820405
CDC42EP1	Acute Lymphoblastic Leukemia	MR Egger	1.12661214724173	0.711624868259564	1.78360114566663	0.614415098787084			MAGEB10	Acute lymphocytic leukaemia	MR Egger	1.08168651143388	0.040655787251788	28.7793150276909	0.965536670426837
CDC42EP1	Acute Lymphoblastic Leukemia	Weighted median	1.30581948161098	0.876953931277318	1.94441744057312	0.188978587288048			MAGEB10	Acute lymphocytic leukaemia	Weighted median	0.968072444345161	0.34620518626822	2.70696192510055	0.950682324880076
CDC42EP1	Acute Lymphoblastic Leukemia	Inverse variance weighted	1.38109509546666	1.03547004525242	1.84208483042798	0.0280066400469977			MAGEB10	Acute lymphocytic leukaemia	Inverse variance weighted	1.04191124527973	0.356198531092399	3.04767972992779	0.940235490421869
CDC42EP1	Acute Lymphoblastic Leukemia	Simple mode	1.0787538332668	0.410589435414683	2.83424202479175	0.87866463702373			MAGEB10	Acute lymphocytic leukaemia	Simple mode	0.342414920682631	0.0425898471222037	2.75295606414531	0.370579760385086
CDC42EP1	Acute Lymphoblastic Leukemia	Weighted mode	1.24615480585999	0.844224190760716	1.83944243385001	0.275783294104001			MAGEB10	Acute lymphocytic leukaemia	Weighted mode	0.961922831020275	0.289809616937792	3.19277028352263	0.952472540619026
CDC42SE1	Acute Lymphoblastic Leukemia	MR Egger	0.811314744017741	0.496816205764792	1.32489964341501	0.408714020400071			GALE	Acute lymphocytic leukaemia	MR Egger	0.32922289155126	0.0157501757616375	6.88168271654284	0.505834363683061
CDC42SE1	Acute Lymphoblastic Leukemia	Weighted median	0.708650001504811	0.492912617652799	1.01881105625602	0.0629729502331057			GALE	Acute lymphocytic leukaemia	Weighted median	0.263615038884332	0.0891251935694841	0.779722163204163	0.0159653858285328
CDC42SE1	Acute Lymphoblastic Leukemia	Inverse variance weighted	0.607376117418662	0.47839132866389	0.771138032624657	4.24350177332729e-05			GALE	Acute lymphocytic leukaemia	Inverse variance weighted	0.354272553811325	0.127647828952045	0.983244630279997	0.0463223413725912
CDC42SE1	Acute Lymphoblastic Leukemia	Simple mode	0.791334475060551	0.43125342067808	1.45207022459031	0.454508675839309			GALE	Acute lymphocytic leukaemia	Simple mode	0.205983103520678	0.0403301424610519	1.05204287282113	0.106314058958061
CDC42SE1	Acute Lymphoblastic Leukemia	Weighted mode	0.732431256825789	0.514364331317934	1.04294857421561	0.0923258277624941			GALE	Acute lymphocytic leukaemia	Weighted mode	0.252050149735149	0.0790518751960929	0.803640366834095	0.0586795776576043
CDHR1	Acute Lymphoblastic Leukemia	MR Egger	1.83735919201083	0.389939827432216	8.65746087722609	0.452332091671721			ELL	Acute lymphocytic leukaemia	MR Egger	3.34689506523529	0.246470666191503	45.4484371336622	0.430959906966676
CDHR1	Acute Lymphoblastic Leukemia	Weighted median	3.1965513139525	1.3724985700903	7.44477300406894	0.00705882199022262			ELL	Acute lymphocytic leukaemia	Weighted median	1.12106782584563	0.476313586872658	2.63858328795111	0.793564299951514
CDHR1	Acute Lymphoblastic Leukemia	Inverse variance weighted	4.2834614819526	2.28038959884026	8.04601208350662	6.09853476692197e-06			ELL	Acute lymphocytic leukaemia	Inverse variance weighted	1.01470646754631	0.314250239519942	3.27646278600519	0.980524055410328
CDHR1	Acute Lymphoblastic Leukemia	Simple mode	2.78507321876182	0.469241490922917	16.530151284381	0.274429729874874			ELL	Acute lymphocytic leukaemia	Simple mode	1.49376039080594	0.368676117712885	6.05225019451466	0.604013652571118
CDHR1	Acute Lymphoblastic Leukemia	Weighted mode	2.85029117909108	1.15250629799418	7.04912400022773	0.0359275452792372			ELL	Acute lymphocytic leukaemia	Weighted mode	1.21284120787361	0.493821746617208	2.9787748425275	0.695447613953575
CDHR3	Acute Lymphoblastic Leukemia	MR Egger	0.906514958045298	0.0379179319100921	21.6723151227863	0.953642497983105			RELB	Acute lymphocytic leukaemia	MR Egger	0.51562285845302	0.0318750219644479	8.34091761429373	0.657378359968927
CDHR3	Acute Lymphoblastic Leukemia	Weighted median	1.78287781250279	0.544176415577144	5.84121840514445	0.339569242144179			RELB	Acute lymphocytic leukaemia	Weighted median	0.877757038962781	0.425688418908909	1.8099092792411	0.723982021836837
CDHR3	Acute Lymphoblastic Leukemia	Inverse variance weighted	2.70872331497776	1.06433430279899	6.89368178570283	0.0365439644602412			RELB	Acute lymphocytic leukaemia	Inverse variance weighted	1.04033737170498	0.432230521913474	2.50399218031783	0.929682780049638
CDHR3	Acute Lymphoblastic Leukemia	Simple mode	2.09892892384258	0.399071482702571	11.0393822116987	0.4103869461658			RELB	Acute lymphocytic leukaemia	Simple mode	0.910119741325589	0.23331480966036	3.55021588537972	0.895946716670857
CDHR3	Acute Lymphoblastic Leukemia	Weighted mode	1.93698441582841	0.419434650095457	8.94515659664327	0.425027801600968			RELB	Acute lymphocytic leukaemia	Weighted mode	0.786979043842327	0.357149297957849	1.73410956983059	0.571011491186967
CDK10	Acute Lymphoblastic Leukemia	MR Egger	1.00238271807235	0.714316768834649	1.40661840422608	0.98906913139536			GPR135	Acute lymphocytic leukaemia	MR Egger	0.236556386834549	0.00269179005059335	20.7887402436463	0.572692081904733
CDK10	Acute Lymphoblastic Leukemia	Weighted median	0.778889951716997	0.582985962926867	1.04062463843887	0.0909148566615263			GPR135	Acute lymphocytic leukaemia	Weighted median	0.784525868757722	0.248903780713636	2.47276613069276	0.678640005617886
CDK10	Acute Lymphoblastic Leukemia	Inverse variance weighted	0.824679644745246	0.686580923402961	0.990555509591388	0.0392568335376054			GPR135	Acute lymphocytic leukaemia	Inverse variance weighted	0.85135757924767	0.226991970597905	3.19310734134463	0.81141597289207
CDK10	Acute Lymphoblastic Leukemia	Simple mode	0.778324107068892	0.478972448702792	1.26476672569634	0.316346810078502			GPR135	Acute lymphocytic leukaemia	Simple mode	0.563479777512758	0.0527044073952601	6.02434360535819	0.659885375620101
CDK10	Acute Lymphoblastic Leukemia	Weighted mode	0.813807547047639	0.598839069663214	1.10594441342006	0.193768600847031			GPR135	Acute lymphocytic leukaemia	Weighted mode	0.824322022233711	0.237211351923016	2.86456272362546	0.77628872737188
CDK13	Acute Lymphoblastic Leukemia	MR Egger	0.386667431791369	0.104858058431265	1.42584847597706	0.175458371028913			RBM19	Acute lymphocytic leukaemia	MR Egger	1.83363993262448	0.664472359361504	5.06000792229477	0.280019486404995
CDK13	Acute Lymphoblastic Leukemia	Weighted median	0.364313100628572	0.188888512550606	0.702658057376812	0.00258699272724682			RBM19	Acute lymphocytic leukaemia	Weighted median	1.5376080202666	0.612478215874782	3.86011838904575	0.359611954548807
CDK13	Acute Lymphoblastic Leukemia	Inverse variance weighted	0.576560664029147	0.347162058907318	0.957541847608635	0.0333678642300473			RBM19	Acute lymphocytic leukaemia	Inverse variance weighted	1.3403988432362	0.618495657800243	2.90490165337461	0.457829683104338
CDK13	Acute Lymphoblastic Leukemia	Simple mode	0.496875480308708	0.165634573467374	1.49054172546071	0.231207863311912			RBM19	Acute lymphocytic leukaemia	Simple mode	0.93588556197117	0.199136994266457	4.39838809625756	0.935178309561985
CDK13	Acute Lymphoblastic Leukemia	Weighted mode	0.409164401922534	0.218379647875363	0.766625962764511	0.0137454304631116			RBM19	Acute lymphocytic leukaemia	Weighted mode	1.51830997241363	0.601396342640402	3.83318788107276	0.402579282092293
CDK19	Acute Lymphoblastic Leukemia	MR Egger	2.25734317612794	0.468574625080242	10.8746781026369	0.336620474355277			HAVCR2	Acute lymphocytic leukaemia	MR Egger	0.000733875313756058	1.25870221162454e-15	427879581.97471	0.693655465142542
CDK19	Acute Lymphoblastic Leukemia	Weighted median	2.3068028207976	0.898808747323792	5.92043554302745	0.0821840964174696			HAVCR2	Acute lymphocytic leukaemia	Weighted median	0.801680551046281	0.0499753500832	12.8601741629804	0.875942076172471
CDK19	Acute Lymphoblastic Leukemia	Inverse variance weighted	2.30476661411813	1.1209823834428	4.73865532947925	0.0231737054043301			HAVCR2	Acute lymphocytic leukaemia	Inverse variance weighted	0.732463175079748	0.0763232274368201	7.02934507443385	0.787281676977075
CDK19	Acute Lymphoblastic Leukemia	Simple mode	2.23598	0.512299569159601	9.75910858324789	0.309620645595116			HAVCR2	Acute lymphocytic leukaemia	Simple mode	1.53962460056048	0.0436118760269255	54.3531745616154	0.834500483028935
CDK19	Acute Lymphoblastic Leukemia	Weighted mode	2.41928750648504	0.857834925861014	6.82293511558762	0.12585128774131			HAVCR2	Acute lymphocytic leukaemia	Weighted mode	1.00738634945871	0.0287111963407059	35.3460456691929	0.997133280085703
CDKN1A	Acute Lymphoblastic Leukemia	MR Egger	5.19544410545441	1.47633264079067	18.2835756028835	0.0246887402792199			UBL4A	Acute lymphocytic leukaemia	MR Egger	2.78543589686248e-09	6.90295700114748e-25	11239608.0900407	0.477156544590308
CDKN1A	Acute Lymphoblastic Leukemia	Weighted median	2.1522780453288	1.00597609570053	4.60478216550322	0.0482279119315777			UBL4A	Acute lymphocytic leukaemia	Weighted median	0.901813139422724	0.0604221631630816	13.4597454950501	0.940263834299728
CDKN1A	Acute Lymphoblastic Leukemia	Inverse variance weighted	1.97337336785606	1.07573329239865	3.62004455610027	0.0281044579478404			UBL4A	Acute lymphocytic leukaemia	Inverse variance weighted	0.582254357660339	0.0644278050749635	5.26201593582142	0.630126963366293
CDKN1A	Acute Lymphoblastic Leukemia	Simple mode	1.84765432836252	0.646140335724466	5.28341341403661	0.272747019233445			UBL4A	Acute lymphocytic leukaemia	Simple mode	1.44617325402417	0.0616503327028437	33.923857162873	0.84003716296941
CDKN1A	Acute Lymphoblastic Leukemia	Weighted mode	2.16009546055115	0.953214827364097	4.89502708596814	0.0879039600503793			UBL4A	Acute lymphocytic leukaemia	Weighted mode	1.38153244606536	0.0510831641295067	37.3632278277155	0.86539869212634
CEACAM19	Acute Lymphoblastic Leukemia	MR Egger	0.550080109353299	0.0324817971881192	9.31562145264594	0.689723575224339			APOL1	Acute lymphocytic leukaemia	MR Egger	1.08001394428523	0.533479661896801	2.18645658524877	0.834919591475035
CEACAM19	Acute Lymphoblastic Leukemia	Weighted median	6.75843043974587	2.08269775758054	21.9313541019728	0.00146462380156793			APOL1	Acute lymphocytic leukaemia	Weighted median	1.12718072842487	0.69218594123993	1.83554203984044	0.630363394069433
CEACAM19	Acute Lymphoblastic Leukemia	Inverse variance weighted	5.78184328608251	2.14846064200121	15.5598436998497	0.000512573527869372			APOL1	Acute lymphocytic leukaemia	Inverse variance weighted	1.11019140095996	0.708512825844091	1.73959440366809	0.648253800485631
CEACAM19	Acute Lymphoblastic Leukemia	Simple mode	4.91583193907319	0.528542252783494	45.7208549097983	0.195146538181988			APOL1	Acute lymphocytic leukaemia	Simple mode	1.12382421097172	0.516691109704066	2.44436343774056	0.773892947642257
CEACAM19	Acute Lymphoblastic Leukemia	Weighted mode	5.01637513222077	0.744016532258537	33.821855262779	0.132039872036383			APOL1	Acute lymphocytic leukaemia	Weighted mode	1.12382421097172	0.740655605167048	1.70522014328287	0.594139808215792
CEBPZ	Acute Lymphoblastic Leukemia	MR Egger	0.672683469887782	0.371344838958449	1.21855214665013	0.1987526504994			CD59	Acute lymphocytic leukaemia	MR Egger	1.29419147294352	0.163970372005019	10.2148427679878	0.816443038875141
CEBPZ	Acute Lymphoblastic Leukemia	Weighted median	0.676004565335076	0.412424284415443	1.10803895314161	0.120404720699322			CD59	Acute lymphocytic leukaemia	Weighted median	1.2971335241409	0.511451804799278	3.28976330450239	0.583760950251724
CEBPZ	Acute Lymphoblastic Leukemia	Inverse variance weighted	0.689131537037482	0.505328750541973	0.939788751046327	0.0186551570478114			CD59	Acute lymphocytic leukaemia	Inverse variance weighted	1.37115976129931	0.568260626781903	3.30848030357725	0.48243601295373
CEBPZ	Acute Lymphoblastic Leukemia	Simple mode	0.620933989613996	0.297646019239203	1.29536091375743	0.211541077559913			CD59	Acute lymphocytic leukaemia	Simple mode	9.06183972476089	1.32737219408853	61.8642906360128	0.0655339000307602
CEBPZ	Acute Lymphoblastic Leukemia	Weighted mode	0.653556707096664	0.39622978648407	1.07800166459269	0.103761289992348			CD59	Acute lymphocytic leukaemia	Weighted mode	1.26346088855807	0.481226141496544	3.31722090564652	0.651687723136486
CECR1	Acute Lymphoblastic Leukemia	MR Egger	2.0263307359673	1.0433480976524	3.9354231447439	0.0534178178081771			FABP1	Acute lymphocytic leukaemia	MR Egger	5331858301132.27	4.75870830187931e-07	5.97403983180188e+31	0.415196874295084
CECR1	Acute Lymphoblastic Leukemia	Weighted median	1.77311023232733	1.1208753446514	2.80487916072562	0.0143785281463061			FABP1	Acute lymphocytic leukaemia	Weighted median	1.0312222007405	0.287266405361234	3.70185725672598	0.962395128140761
CECR1	Acute Lymphoblastic Leukemia	Inverse variance weighted	1.84002499878035	1.29544219148773	2.61354155236243	0.000659844207081381			FABP1	Acute lymphocytic leukaemia	Inverse variance weighted	1.61123723740274	0.54410491846759	4.77129565839026	0.389131698693445
CECR1	Acute Lymphoblastic Leukemia	Simple mode	1.64449700372675	0.773640007024791	3.4956444479475	0.213333391663266			FABP1	Acute lymphocytic leukaemia	Simple mode	0.973039478989293	0.212986916371981	4.44537084155048	0.975074582376603
CECR1	Acute Lymphoblastic Leukemia	Weighted mode	1.8062661662272	1.15226842819195	2.83145609428571	0.0195498820552206			FABP1	Acute lymphocytic leukaemia	Weighted mode	0.978108304967254	0.197786684658058	4.83700840579785	0.980811360756294
CELSR2	Acute Lymphoblastic Leukemia	MR Egger	0.353384438756695	0.109855701046387	1.13677	0.0990409245830736			HMBS	Acute lymphocytic leukaemia	MR Egger	0.694390362687443	4.2745315238095e-06	112802.531249899	0.95623661165937
CELSR2	Acute Lymphoblastic Leukemia	Weighted median	0.643838666773373	0.310769546757529	1.33387660778725	0.236097786557856			HMBS	Acute lymphocytic leukaemia	Weighted median	0.500638333071081	0.0638280735469972	3.92677902703179	0.510291315646925
CELSR2	Acute Lymphoblastic Leukemia	Inverse variance weighted	0.579119591065199	0.342374947472979	0.979567877938827	0.0416518826153931			HMBS	Acute lymphocytic leukaemia	Inverse variance weighted	0.530560558022522	0.0932548040114917	3.01855232781876	0.474896420899862
CELSR2	Acute Lymphoblastic Leukemia	Simple mode	0.402523300022617	0.12458901639274	1.30047585053845	0.145658241763172			HMBS	Acute lymphocytic leukaemia	Simple mode	0.420775448379256	0.0294435374833008	6.01327126739376	0.558202159136219
CELSR2	Acute Lymphoblastic Leukemia	Weighted mode	0.537081237569188	0.24730921136008	1.16637893979962	0.13358819468828			HMBS	Acute lymphocytic leukaemia	Weighted mode	0.41187464259623	0.026519219390687	6.39689723572129	0.560606592904687
CENPB	Acute Lymphoblastic Leukemia	MR Egger	2.7396665775361	0.363289559240758	20.6605798739571	0.360789068412593			LRIT3	Acute lymphocytic leukaemia	MR Egger	1.21413661695236	0.0398389990027489	37.0021276017205	0.921541733113173
CENPB	Acute Lymphoblastic Leukemia	Weighted median	4.42258950025938	1.77332359937216	11.0297398031185	0.0014295472040028			LRIT3	Acute lymphocytic leukaemia	Weighted median	2.7492515605179	0.378311489399791	19.9792614149833	0.31759407271055
CENPB	Acute Lymphoblastic Leukemia	Inverse variance weighted	3.72086795667919	1.75030485559376	7.90996968716362	0.000638207139654732			LRIT3	Acute lymphocytic leukaemia	Inverse variance weighted	2.74471841363009	0.534915122944037	14.0835038064688	0.22622592345326
CENPB	Acute Lymphoblastic Leukemia	Simple mode	4.46918774384655	1.46410982790933	13.6421726765331	0.0301969866934267			LRIT3	Acute lymphocytic leukaemia	Simple mode	5.42491749808781	0.278216228945065	105.780061690328	0.345829255198408
CENPB	Acute Lymphoblastic Leukemia	Weighted mode	4.77181183900425	1.67236727156902	13.6155428379665	0.0192528721139361			LRIT3	Acute lymphocytic leukaemia	Weighted mode	6.01214384822689	0.313984693027998	115.119859198198	0.319325931116497
CENPN	Acute Lymphoblastic Leukemia	MR Egger	0.839326251036128	0.320530266513973	2.19782226290212	0.733571322377354			MYSM1	Acute lymphocytic leukaemia	MR Egger	435510.732206578	0.000809626469365354	234268029818476	0.425627376565388
CENPN	Acute Lymphoblastic Leukemia	Weighted median	2.35612789552087	1.29142316279969	4.29862094777423	0.00521149178567106			MYSM1	Acute lymphocytic leukaemia	Weighted median	15.1918218017737	1.19744111036234	192.737202405728	0.0358159643438291
CENPN	Acute Lymphoblastic Leukemia	Inverse variance weighted	2.97345427379076	1.56206837041795	5.66007896053801	0.000906552758604748			MYSM1	Acute lymphocytic leukaemia	Inverse variance weighted	8.65161375602686	1.06826012359505	70.0675977041775	0.0431894422990786
CENPN	Acute Lymphoblastic Leukemia	Simple mode	3.66252021057915	1.36985949791634	9.79228476592275	0.0360910288687741			MYSM1	Acute lymphocytic leukaemia	Simple mode	17.8049873895063	0.693976976089967	456.812814924542	0.224105629786587
CENPN	Acute Lymphoblastic Leukemia	Weighted mode	2.27985112047766	1.2401990239149	4.19104	0.0327979484366754			MYSM1	Acute lymphocytic leukaemia	Weighted mode	18.9723858652842	0.925135912712015	389.079507643419	0.196394671657249
CENPV	Acute Lymphoblastic Leukemia	MR Egger	0.70841989647602	0.402397958869196	1.24717021709901	0.240767566152946			TFR2	Acute lymphocytic leukaemia	MR Egger	0.0764411342520477	0.00141019084451518	4.14358597523619	0.334134729571391
CENPV	Acute Lymphoblastic Leukemia	Weighted median	0.771002054178594	0.516282324621782	1.15139360616905	0.203721970620502			TFR2	Acute lymphocytic leukaemia	Weighted median	1.3521380197385	0.322221460924919	5.67397720553557	0.680127403059716
CENPV	Acute Lymphoblastic Leukemia	Inverse variance weighted	0.668571821843279	0.508167298949576	0.879608510596417	0.00402115613195869			TFR2	Acute lymphocytic leukaemia	Inverse variance weighted	1.35272466195957	0.334730027668801	5.46668616442198	0.671555962983832
CENPV	Acute Lymphoblastic Leukemia	Simple mode	0.532783912755655	0.262760838387705	1.08029301258504	0.0898683841879632			TFR2	Acute lymphocytic leukaemia	Simple mode	0.287124762329144	0.0101696746616908	8.10651588030848	0.51708775614771
CENPV	Acute Lymphoblastic Leukemia	Weighted mode	0.712186176104171	0.424106967667803	1.19594627794743	0.208030698183622			TFR2	Acute lymphocytic leukaemia	Weighted mode	1.14876332939195	0.225604186249769	5.84943572587196	0.877989525795784
CEP170B	Acute Lymphoblastic Leukemia	MR Egger	0.736711009707355	0.401500020155919	1.35178850455166	0.341813443583605			FOXO3	Acute lymphocytic leukaemia	MR Egger	38.4000652179394	1.31486339124483e-07	11214587146.9277	0.748927976153116
CEP170B	Acute Lymphoblastic Leukemia	Weighted median	0.790817870990431	0.507522979450594	1.23224549508052	0.299681720420687			FOXO3	Acute lymphocytic leukaemia	Weighted median	1.54243611358254	0.247874444816187	9.59804132389629	0.642213333738621
CEP170B	Acute Lymphoblastic Leukemia	Inverse variance weighted	0.69997378625123	0.49876362858275	0.982355715935274	0.039117187551276			FOXO3	Acute lymphocytic leukaemia	Inverse variance weighted	1.77385898918944	0.341955822237495	9.20170240980085	0.494985911513356
CEP170B	Acute Lymphoblastic Leukemia	Simple mode	0.593047432676868	0.26633029131702	1.32056048024211	0.221615970706755			FOXO3	Acute lymphocytic leukaemia	Simple mode	1.08282412119435	0.0761334651061231	15.4006923999313	0.956848323177592
CEP170B	Acute Lymphoblastic Leukemia	Weighted mode	0.740521271433009	0.483474814414465	1.1342302372232	0.188933994077831			FOXO3	Acute lymphocytic leukaemia	Weighted mode	1.27524583718816	0.0899676122805268	18.0759709415754	0.868816618226096
CEP97	Acute Lymphoblastic Leukemia	MR Egger	0.953459093641293	0.0496191643914897	18.3212324188836	0.975670451821571			TMEM230	Acute lymphocytic leukaemia	MR Egger	1.26419391028467e-16	1.51351016081943e-37	105594.682095531	0.376425617336364
CEP97	Acute Lymphoblastic Leukemia	Weighted median	2.72285076799032	0.92014623818151	8.05732393081084	0.0703502811874123			TMEM230	Acute lymphocytic leukaemia	Weighted median	1.63787482056882	0.167261158105659	16.0385947235802	0.67167276698003
CEP97	Acute Lymphoblastic Leukemia	Inverse variance weighted	2.70428705239127	1.14752490621965	6.37299323273357	0.0229281440975896			TMEM230	Acute lymphocytic leukaemia	Inverse variance weighted	1.69318953359363	0.178199327799495	16.0881122957813	0.646635978822355
CEP97	Acute Lymphoblastic Leukemia	Simple mode	2.7833845922148	0.605021898401683	12.8048750113756	0.225057733943444			TMEM230	Acute lymphocytic leukaemia	Simple mode	0.355174767205212	0.0172853866544595	7.29802102672262	0.571227866756834
CEP97	Acute Lymphoblastic Leukemia	Weighted mode	2.89576557677596	0.878188522784421	9.54858559191064	0.118842111044202			TMEM230	Acute lymphocytic leukaemia	Weighted mode	0.405829999403234	0.033880487162033	4.86114581611424	0.550395845511408
CERK	Acute Lymphoblastic Leukemia	MR Egger	0.769043779738547	0.390701972476832	1.51375825262726	0.453808610629337			LIMA1	Acute lymphocytic leukaemia	MR Egger	0.214949838743792	0.00220207105869166	20.9818084632716	0.55765759244642
CERK	Acute Lymphoblastic Leukemia	Weighted median	0.679067847923706	0.418437225681264	1.10203661094673	0.11718478361262			LIMA1	Acute lymphocytic leukaemia	Weighted median	1.28845747649107	0.361275432457714	4.59517177083453	0.696045147803648
CERK	Acute Lymphoblastic Leukemia	Inverse variance weighted	0.60260214562288	0.420237576797193	0.864104891991955	0.00588254590590295			LIMA1	Acute lymphocytic leukaemia	Inverse variance weighted	1.29107442192183	0.377811520354901	4.41191724745447	0.683652489232397
CERK	Acute Lymphoblastic Leukemia	Simple mode	0.40622839956957	0.17437129875479	0.946380016638611	0.046041282925701			LIMA1	Acute lymphocytic leukaemia	Simple mode	1.83955136995893	0.184422215130712	18.3489241809581	0.630893370686705
CERK	Acute Lymphoblastic Leukemia	Weighted mode	0.594861013847321	0.378192795873542	0.935659350618049	0.032650683057366			LIMA1	Acute lymphocytic leukaemia	Weighted mode	1.20906327934249	0.282243627778789	5.17933398517734	0.810744753258341
CERS2	Acute Lymphoblastic Leukemia	MR Egger	1.56353732818255	0.415270983420455	5.88687645952151	0.522361611014295			CYGB	Acute lymphocytic leukaemia	MR Egger	63.3940971926444	0.0156388682728284	256975.855845841	0.506760871186074
CERS2	Acute Lymphoblastic Leukemia	Weighted median	1.99879997933464	0.928408467432118	4.3032797497404	0.0767049498373779			CYGB	Acute lymphocytic leukaemia	Weighted median	6.33491344686901	0.328361510166989	122.216	0.221511437418049
CERS2	Acute Lymphoblastic Leukemia	Inverse variance weighted	1.98864609155348	1.07658557079495	3.67338499115381	0.0281136895709953			CYGB	Acute lymphocytic leukaemia	Inverse variance weighted	7.21541981545544	0.564707372612818	92.1933830479004	0.128418604806545
CERS2	Acute Lymphoblastic Leukemia	Simple mode	2.53950232054018	0.600634141284175	10.7371053237843	0.229198989639796			CYGB	Acute lymphocytic leukaemia	Simple mode	1.24004158089769	0.020875185949158	73.661768862819	0.927189146883205
CERS2	Acute Lymphoblastic Leukemia	Weighted mode	2.00224794471387	0.868160734336911	4.61780482985438	0.12939282633237			CYGB	Acute lymphocytic leukaemia	Weighted mode	24.7584061660605	0.972111682700443	630.564046078348	0.191504043507723
CFD	Acute Lymphoblastic Leukemia	MR Egger	1.18246739650732	0.953835719797979	1.46590142807708	0.131734235997569			MUSK	Acute lymphocytic leukaemia	MR Egger	0.733117922605221	0.0276147063893512	19.4628862196504	0.858895646554043
CFD	Acute Lymphoblastic Leukemia	Weighted median	1.21794968839125	0.983607518521077	1.50812332716075	0.070543556984734			MUSK	Acute lymphocytic leukaemia	Weighted median	0.738441452231777	0.195666728257312	2.78686	0.654535467407345
CFD	Acute Lymphoblastic Leukemia	Inverse variance weighted	1.21500141922367	1.06495565996093	1.38618771111062	0.00378200135822968			MUSK	Acute lymphocytic leukaemia	Inverse variance weighted	0.834868444568502	0.286776980045325	2.43047862358432	0.740611583177887
CFD	Acute Lymphoblastic Leukemia	Simple mode	0.921422391456174	0.603573387795098	1.40665450240997	0.705937227143079			MUSK	Acute lymphocytic leukaemia	Simple mode	0.515362681397729	0.0676911032152511	3.92368687703138	0.54251219976379
CFD	Acute Lymphoblastic Leukemia	Weighted mode	1.25674605298034	1.0345211829729	1.52670691299226	0.0248911686948557			MUSK	Acute lymphocytic leukaemia	Weighted mode	0.653787984903658	0.113848294053943	3.75445879761586	0.648208408163327
CHAF1A	Acute Lymphoblastic Leukemia	MR Egger	2.89176321247678	0.92274198364922	9.0624406662014	0.0957249044899642			ISL1	Acute lymphocytic leukaemia	MR Egger	0.00475712436018523	2.79029875404281e-06	8.11032587298374	0.393005045336038
CHAF1A	Acute Lymphoblastic Leukemia	Weighted median	1.80405492752397	0.983106449814037	3.31054097156942	0.0567811678708317			ISL1	Acute lymphocytic leukaemia	Weighted median	0.910514750588863	0.123463396872765	6.71484125691325	0.926730432503222
CHAF1A	Acute Lymphoblastic Leukemia	Inverse variance weighted	1.75536235770102	1.10093485096044	2.7988004959109	0.0180787427732444			ISL1	Acute lymphocytic leukaemia	Inverse variance weighted	0.490475076036729	0.0922445234363396	2.60791417475592	0.40336784641416
CHAF1A	Acute Lymphoblastic Leukemia	Simple mode	2.62036596461153	1.00345015442424	6.84270938443804	0.0727338275669972			ISL1	Acute lymphocytic leukaemia	Simple mode	1.11956382616832	0.0875557366376739	14.3157171534242	0.938694815965945
CHAF1A	Acute Lymphoblastic Leukemia	Weighted mode	1.86309672137224	0.936054514007193	3.70825559969609	0.101789600121177			ISL1	Acute lymphocytic leukaemia	Weighted mode	1.10517243049185	0.0903525407433711	13.5182263948553	0.944736042574975
CHD1L	Acute Lymphoblastic Leukemia	MR Egger	2.12208502405158	1.00542488875723	4.4789470597553	0.0604871886423254			ARFGAP1	Acute lymphocytic leukaemia	MR Egger	3.11692022652207	0.0304897948035952	318.637490382744	0.650464553484933
CHD1L	Acute Lymphoblastic Leukemia	Weighted median	1.51276530623274	0.934002732707519	2.45016292951046	0.0924743637484409			ARFGAP1	Acute lymphocytic leukaemia	Weighted median	0.639525811374196	0.174601853859947	2.34243368195786	0.49973555775903
CHD1L	Acute Lymphoblastic Leukemia	Inverse variance weighted	1.53525134182717	1.08445345654039	2.17344199363003	0.0156431055054367			ARFGAP1	Acute lymphocytic leukaemia	Inverse variance weighted	0.794582781107986	0.301810748311475	2.09191289430727	0.64152405579027
CHD1L	Acute Lymphoblastic Leukemia	Simple mode	1.31966492845826	0.656004728044964	2.65473013981598	0.44428274739687			ARFGAP1	Acute lymphocytic leukaemia	Simple mode	0.496270674794991	0.0715164725656112	3.4437462283326	0.504995114531714
CHD1L	Acute Lymphoblastic Leukemia	Weighted mode	1.40445584414504	0.829776801437144	2.37714071390867	0.218010277964566			ARFGAP1	Acute lymphocytic leukaemia	Weighted mode	0.57915257785152	0.0866666946771259	3.87020307722187	0.59345750752052
CHI3L2	Acute Lymphoblastic Leukemia	MR Egger	1.24530800028728	0.941502435307529	1.64714604808532	0.13022422403763			SMURF1	Acute lymphocytic leukaemia	MR Egger	0.103804523367541	0.00331948771400634	3.24609698842878	0.419890218340281
CHI3L2	Acute Lymphoblastic Leukemia	Weighted median	1.28743552434029	1.00689530771267	1.64613959032008	0.0439257611845013			SMURF1	Acute lymphocytic leukaemia	Weighted median	0.671253749549497	0.158640774697953	2.84026346405678	0.588088771482394
CHI3L2	Acute Lymphoblastic Leukemia	Inverse variance weighted	1.32715391701132	1.10616674720582	1.59228933963855	0.00232053947243246			SMURF1	Acute lymphocytic leukaemia	Inverse variance weighted	0.940619658529439	0.176141601134915	5.02303451490916	0.942903035006214
CHI3L2	Acute Lymphoblastic Leukemia	Simple mode	1.34036800026733	0.90970097310829	1.97491970356151	0.144418226278719			SMURF1	Acute lymphocytic leukaemia	Simple mode	0.745378969085989	0.0857677387996322	6.47784138105405	0.81489892258657
CHI3L2	Acute Lymphoblastic Leukemia	Weighted mode	1.31222898883224	1.0556081751661	1.63123492185983	0.0177349633598847			SMURF1	Acute lymphocytic leukaemia	Weighted mode	0.589673347713751	0.10841399388074	3.20728574381683	0.603245638236638
CHRM3-AS2	Acute Lymphoblastic Leukemia	MR Egger	1.40887691056297	1.04734874080953	1.89519886908275	0.0398492222773374			SYTL4	Acute lymphocytic leukaemia	MR Egger	10.3031677524037	0.0923060933824386	1150.03529934208	0.387165951371051
CHRM3-AS2	Acute Lymphoblastic Leukemia	Weighted median	1.32885614513493	1.03102250446226	1.71272561638591	0.0280945117748013			SYTL4	Acute lymphocytic leukaemia	Weighted median	0.884414650206843	0.238375617808867	3.2813308705409	0.85430848967047
CHRM3-AS2	Acute Lymphoblastic Leukemia	Inverse variance weighted	1.26927422516236	1.04736656172763	1.53819791229928	0.0150147775841273			SYTL4	Acute lymphocytic leukaemia	Inverse variance weighted	0.754393069851201	0.186367217592822	3.05369641286869	0.692777987676334
CHRM3-AS2	Acute Lymphoblastic Leukemia	Simple mode	1.02504609808272	0.629171758014415	1.67000423939966	0.922185473316861			SYTL4	Acute lymphocytic leukaemia	Simple mode	0.394906217847445	0.0409963088997941	3.80402346161844	0.45793528453104
CHRM3-AS2	Acute Lymphoblastic Leukemia	Weighted mode	1.3410224090409	1.02792883021447	1.74948016700208	0.0470937889663843			SYTL4	Acute lymphocytic leukaemia	Weighted mode	0.959853097606995	0.227751943013266	4.04526941371507	0.957640412116655
CHSY1	Acute Lymphoblastic Leukemia	MR Egger	0.620114499796825	0.440569845507769	0.872828671274746	0.0119563152451608			ZNF10	Acute lymphocytic leukaemia	MR Egger	4.27383993510798	9.33576708202677e-05	195652.993807964	0.834917050845079
CHSY1	Acute Lymphoblastic Leukemia	Weighted median	0.63843889630726	0.469276699323495	0.86857972046264	0.00427537100503059			ZNF10	Acute lymphocytic leukaemia	Weighted median	2.18518	0.828903729980168	5.76064811879502	0.113975388846749
CHSY1	Acute Lymphoblastic Leukemia	Inverse variance weighted	0.605972446246185	0.481409743678511	0.762765212859519	1.98502264139592e-05			ZNF10	Acute lymphocytic leukaemia	Inverse variance weighted	2.31436745019506	0.522226624568503	10.2566518873834	0.26927766745531
CHSY1	Acute Lymphoblastic Leukemia	Simple mode	0.610095919140218	0.368063863996143	1.01128382044983	0.067812219471161			ZNF10	Acute lymphocytic leukaemia	Simple mode	1.44861684621865	0.222843274899456	9.41689071880345	0.735386303060271
CHSY1	Acute Lymphoblastic Leukemia	Weighted mode	0.655740051077281	0.495066491607585	0.868560126520685	0.00730824379755884			ZNF10	Acute lymphocytic leukaemia	Weighted mode	2.07783934003743	0.759087527115151	5.68763965786023	0.290586246183742
CIB2	Acute Lymphoblastic Leukemia	MR Egger	3.44847876093127	0.317019302701489	37.5119295994155	0.343185683594052			FKBP1B	Acute lymphocytic leukaemia	MR Egger	0.585139303217711	0.112957302781203	3.03112765390042	0.588461182462113
CIB2	Acute Lymphoblastic Leukemia	Weighted median	3.75504301550195	1.27283542562649	11.0779035249823	0.016526815478961			FKBP1B	Acute lymphocytic leukaemia	Weighted median	0.524574781466056	0.195699952590245	1.40612553916315	0.199675837880935
CIB2	Acute Lymphoblastic Leukemia	Inverse variance weighted	2.79530811754911	1.20325769546235	6.49382713404008	0.0168367966006128			FKBP1B	Acute lymphocytic leukaemia	Inverse variance weighted	0.535381736868406	0.206359042852625	1.38900433055864	0.198979734830547
CIB2	Acute Lymphoblastic Leukemia	Simple mode	3.98912767787367	1.0086098153785	15.7772999902902	0.0840544543179277			FKBP1B	Acute lymphocytic leukaemia	Simple mode	1.91298629189037	0.279818589625141	13.0781752486957	0.55562043397331
CIB2	Acute Lymphoblastic Leukemia	Weighted mode	3.81858168328894	1.3636401798139	10.6931185277481	0.0341553760538563			FKBP1B	Acute lymphocytic leukaemia	Weighted mode	0.537108229484744	0.198392442064869	1.45411411431646	0.308573173158983
CIB3	Acute Lymphoblastic Leukemia	MR Egger	0.0264729462985587	0.000225833858650909	3.10324098393805	0.375493435487031			BCAP29	Acute lymphocytic leukaemia	MR Egger	0.949564233966637	0.0372535078760716	24.203686735439	0.97651204342447
CIB3	Acute Lymphoblastic Leukemia	Weighted median	0.31114200643386	0.062649779348711	1.54524643460983	0.153350913786258			BCAP29	Acute lymphocytic leukaemia	Weighted median	0.706536627077414	0.243956120909159	2.04624505235436	0.521990552799342
CIB3	Acute Lymphoblastic Leukemia	Inverse variance weighted	0.21797383411109	0.0558238472455742	0.851116408155763	0.028382679614402			BCAP29	Acute lymphocytic leukaemia	Inverse variance weighted	0.745976361798123	0.220463246315898	2.5241428748817	0.637483302721206
CIB3	Acute Lymphoblastic Leukemia	Simple mode	0.352267781166515	0.0508119356160921	2.44219371183883	0.401634471038659			BCAP29	Acute lymphocytic leukaemia	Simple mode	0.301995514740276	0.031716356998891	2.87552857746031	0.345418627767785
CIB3	Acute Lymphoblastic Leukemia	Weighted mode	0.361305361663658	0.0516991317662588	2.52502430712201	0.412673605766173			BCAP29	Acute lymphocytic leukaemia	Weighted mode	0.748430406777472	0.243223185695907	2.30302087437267	0.634824448557951
CIR1	Acute Lymphoblastic Leukemia	MR Egger	2.40620975621599	0.621021988262465	9.32309241917216	0.223217168046379			KLRC3	Acute lymphocytic leukaemia	MR Egger	0.385031249271018	0.104944871341666	1.41263752120435	0.223522192841127
CIR1	Acute Lymphoblastic Leukemia	Weighted median	1.73913635754942	0.834892246350103	3.62273728540765	0.139398889541581			KLRC3	Acute lymphocytic leukaemia	Weighted median	0.624515153784935	0.264663231156623	1.47364322426871	0.282467578798075
CIR1	Acute Lymphoblastic Leukemia	Inverse variance weighted	1.91629303861483	1.09390542526894	3.35694377687254	0.0229790854653065			KLRC3	Acute lymphocytic leukaemia	Inverse variance weighted	0.590565881640477	0.266087942103326	1.31072478444875	0.19539084017377
CIR1	Acute Lymphoblastic Leukemia	Simple mode	2.55125692380352	0.722454631389644	9.00944032808741	0.165017499074699			KLRC3	Acute lymphocytic leukaemia	Simple mode	0.77477116260018	0.210193517814133	2.85579860235097	0.717179550259361
CIR1	Acute Lymphoblastic Leukemia	Weighted mode	1.76042937657679	0.797793169916526	3.88460531723882	0.180439957498286			KLRC3	Acute lymphocytic leukaemia	Weighted mode	0.629399896068014	0.269733944136653	1.46864804293868	0.333137129199047
CKM	Acute Lymphoblastic Leukemia	MR Egger	0.255142768135888	0.100748265783555	0.646143450964186	0.00994018984765155			DNM2	Acute lymphocytic leukaemia	MR Egger	0.000411750791080359	3.23201401498017e-12	52456.0577922934	0.56327130317387
CKM	Acute Lymphoblastic Leukemia	Weighted median	0.511449934111189	0.287797198304902	0.908907510715973	0.0222791499321734			DNM2	Acute lymphocytic leukaemia	Weighted median	1.47236331975772	0.063876212920615	33.938357429896	0.809040704187082
CKM	Acute Lymphoblastic Leukemia	Inverse variance weighted	0.499198766747356	0.330000909709096	0.755147641689098	0.0010022917203708			DNM2	Acute lymphocytic leukaemia	Inverse variance weighted	0.740716100839693	0.0500833708144681	10.9549403947999	0.827141689106673
CKM	Acute Lymphoblastic Leukemia	Simple mode	0.721049404168034	0.268290759487958	1.93786861777628	0.524497815404105			DNM2	Acute lymphocytic leukaemia	Simple mode	2.17319910280025	0.0410383979646	115.082327153359	0.738425933647537
CKM	Acute Lymphoblastic Leukemia	Weighted mode	0.500192750096968	0.27566691848384	0.907590902185945	0.0344010566423088			DNM2	Acute lymphocytic leukaemia	Weighted mode	0.245968108667405	0.00816529463451379	7.40944609955562	0.504255444413183
CLDN5	Acute Lymphoblastic Leukemia	MR Egger	1.59795320094552	0.815816758140837	3.1299362349838	0.183477280563887			SRSF6	Acute lymphocytic leukaemia	MR Egger	86.0465397402145	1.81585588993186e-21	4.0774199331105e+24	0.894513411981899
CLDN5	Acute Lymphoblastic Leukemia	Weighted median	1.85023533482289	1.23576300191216	2.77024865522759	0.00280846155370434			SRSF6	Acute lymphocytic leukaemia	Weighted median	0.914098514710099	0.0690734502677959	12.096921340337	0.945658354516662
CLDN5	Acute Lymphoblastic Leukemia	Inverse variance weighted	1.68578229189846	1.2597335247576	2.25592308200679	0.00044233577665987			SRSF6	Acute lymphocytic leukaemia	Inverse variance weighted	1.24569	0.152068454003287	10.204265432504	0.837774566699402
CLDN5	Acute Lymphoblastic Leukemia	Simple mode	1.65289551715626	0.932227079812514	2.93068464733368	0.096909241104543			SRSF6	Acute lymphocytic leukaemia	Simple mode	0.837221105626541	0.0527610896257628	13.2851535985766	0.911275315064185
CLDN5	Acute Lymphoblastic Leukemia	Weighted mode	1.75709959111571	1.14371679310545	2.69944359627353	0.0158974542172535			SRSF6	Acute lymphocytic leukaemia	Weighted mode	0.839893497759377	0.0450030577184327	15.6749590659381	0.917651729070124
CLIC3	Acute Lymphoblastic Leukemia	MR Egger	0.810934301277101	0.262291606266811	2.50718827928803	0.721363821818647			MGA	Acute lymphocytic leukaemia	MR Egger	6.0821904263752	0.00548844412380683	6740.16889818157	0.663858188744347
CLIC3	Acute Lymphoblastic Leukemia	Weighted median	0.644459137782107	0.34579748723984	1.20107171277041	0.166607693289481			MGA	Acute lymphocytic leukaemia	Weighted median	1.48519238408907	0.409087710974371	5.39198895147053	0.547656369977711
CLIC3	Acute Lymphoblastic Leukemia	Inverse variance weighted	0.545460117266392	0.347780022786935	0.85550267420203	0.00829881412153476			MGA	Acute lymphocytic leukaemia	Inverse variance weighted	1.09821495203902	0.248470499791845	4.85400110633836	0.901663616461251
CLIC3	Acute Lymphoblastic Leukemia	Simple mode	0.335934959343476	0.107760698266697	1.04724912444243	0.079612731042131			MGA	Acute lymphocytic leukaemia	Simple mode	1.2860626230781	0.134889610396539	12.261560142522	0.840928440632982
CLIC3	Acute Lymphoblastic Leukemia	Weighted mode	0.671885613907972	0.347994810276884	1.29723278866518	0.25456044482383			MGA	Acute lymphocytic leukaemia	Weighted mode	1.62973414949303	0.434530917709954	6.11241522702566	0.521320630172956
CLIC4	Acute Lymphoblastic Leukemia	MR Egger	1.70673972551091	0.78213621600162	3.72436467080948	0.196998603752376			PRC1	Acute lymphocytic leukaemia	MR Egger	0.229437691377964	0.000129377216016021	406.885043950329	0.765643093436539
CLIC4	Acute Lymphoblastic Leukemia	Weighted median	2.20535676369069	1.22091667967128	3.9835629540795	0.00875076072244035			PRC1	Acute lymphocytic leukaemia	Weighted median	1.09757814325052	0.14619331883333	8.24030667170686	0.927871728096432
CLIC4	Acute Lymphoblastic Leukemia	Inverse variance weighted	2.14031341349531	1.38979190151606	3.29613484075625	0.000552169939921422			PRC1	Acute lymphocytic leukaemia	Inverse variance weighted	1.97666763103214	0.317992496678199	12.287129301432	0.464802868985069
CLIC4	Acute Lymphoblastic Leukemia	Simple mode	2.57746138436568	0.967284526587845	6.86799695983036	0.0744831184782324			PRC1	Acute lymphocytic leukaemia	Simple mode	1.09817688522412	0.0653744983857101	18.4474451203463	0.954043067731962
CLIC4	Acute Lymphoblastic Leukemia	Weighted mode	2.08139869457942	1.19510757553097	3.62496281882589	0.0184965473382071			PRC1	Acute lymphocytic leukaemia	Weighted mode	1.07646997780043	0.122930916166494	9.42633187192895	0.952985844246049
CLIP2	Acute Lymphoblastic Leukemia	MR Egger	1.43557005112831	0.117457745102767	17.5455553815836	0.785290848756594			ELAVL1	Acute lymphocytic leukaemia	MR Egger	0.00744561630222445	2.91482244979635e-05	1.90190665382805	0.225289774189187
CLIP2	Acute Lymphoblastic Leukemia	Weighted median	1.78006033583427	0.679475033645683	4.66332777851953	0.240573782141545			ELAVL1	Acute lymphocytic leukaemia	Weighted median	0.789211774623065	0.134377420137201	4.63511819595694	0.793263877444145
CLIP2	Acute Lymphoblastic Leukemia	Inverse variance weighted	2.46240353136724	1.13613605507558	5.33688823992691	0.0224061042321329			ELAVL1	Acute lymphocytic leukaemia	Inverse variance weighted	0.929782605378926	0.183279138094257	4.71682539679244	0.92997944889749
CLIP2	Acute Lymphoblastic Leukemia	Simple mode	1.43614336151261	0.313416823680984	6.58071806928939	0.653592059540101			ELAVL1	Acute lymphocytic leukaemia	Simple mode	1.08576386513909	0.0718620415321105	16.4048104633238	0.956372221014804
CLIP2	Acute Lymphoblastic Leukemia	Weighted mode	1.43614336151261	0.37258861699942	5.53561665792906	0.613279959619595			ELAVL1	Acute lymphocytic leukaemia	Weighted mode	0.596410566853699	0.0646799650364302	5.49947057105556	0.679379175228077
CLMN	Acute Lymphoblastic Leukemia	MR Egger	0.398918578774816	0.23720739993152	0.67087296828708	0.00209908494252073			CXCL9	Acute lymphocytic leukaemia	MR Egger	0.0102461399100552	1.69443509244036e-06	61.9577483521235	0.490239786584369
CLMN	Acute Lymphoblastic Leukemia	Weighted median	0.676981926176477	0.456392177802693	1.00419014755276	0.0524752162512284			CXCL9	Acute lymphocytic leukaemia	Weighted median	2.02935916114898	0.260803354621495	15.7908191438573	0.498986099056764
CLMN	Acute Lymphoblastic Leukemia	Inverse variance weighted	0.646006359637715	0.491607745828272	0.848896747933163	0.00171517516235888			CXCL9	Acute lymphocytic leukaemia	Inverse variance weighted	2.12245335584974	0.305683199912269	14.7368525619029	0.446535986337007
CLMN	Acute Lymphoblastic Leukemia	Simple mode	0.839459676952254	0.414651636256021	1.69948093197365	0.631168660299456			CXCL9	Acute lymphocytic leukaemia	Simple mode	0.702122376705939	0.0326861341780232	15.082108798374	0.842202421817104
CLMN	Acute Lymphoblastic Leukemia	Weighted mode	0.649583175719108	0.414510693896309	1.0179672283265	0.0719745679652986			CXCL9	Acute lymphocytic leukaemia	Weighted mode	1.0503092394967	0.106745378344776	10.3344005677612	0.970259826246164
CLN6	Acute Lymphoblastic Leukemia	MR Egger	1.09172380281087	0.709330285649934	1.68026219341779	0.691807516231923			DHX8	Acute lymphocytic leukaemia	MR Egger	1.00415472042281	0.339082155589854	2.97369438622731	0.994211016258296
CLN6	Acute Lymphoblastic Leukemia	Weighted median	1.40624644939581	1.00518657912941	1.96732538764202	0.046568991456037			DHX8	Acute lymphocytic leukaemia	Weighted median	1.03248307110483	0.494790803804688	2.1544888949449	0.932121161551492
CLN6	Acute Lymphoblastic Leukemia	Inverse variance weighted	1.24749191080217	1.00922097662085	1.54201716330507	0.040866949396119			DHX8	Acute lymphocytic leukaemia	Inverse variance weighted	0.89762304413649	0.472579031985284	1.70495742475081	0.7414234938205
CLN6	Acute Lymphoblastic Leukemia	Simple mode	1.26462109164618	0.689660750752874	2.31891767610457	0.451690075080717			DHX8	Acute lymphocytic leukaemia	Simple mode	1.13431444372286	0.222457208049581	5.7838955568998	0.882821821947581
CLN6	Acute Lymphoblastic Leukemia	Weighted mode	1.31323044610484	0.941985055997079	1.83078722278804	0.114656617993991			DHX8	Acute lymphocytic leukaemia	Weighted mode	1.04287984190695	0.487556505370476	2.23071244599523	0.916186289390177
CMAHP	Acute Lymphoblastic Leukemia	MR Egger	1.43637206448078	1.05790960288475	1.95022779072507	0.0237740481845154			MAP1LC3B	Acute lymphocytic leukaemia	MR Egger	0.421060860967661	0.0681185893758071	2.60269994231258	0.387907042187083
CMAHP	Acute Lymphoblastic Leukemia	Weighted median	1.19108074946812	0.903972791051924	1.56937616463287	0.214018749196885			MAP1LC3B	Acute lymphocytic leukaemia	Weighted median	0.686686826360623	0.243483460917237	1.93663584261892	0.47736328689532
CMAHP	Acute Lymphoblastic Leukemia	Inverse variance weighted	1.34939704084148	1.11337307656974	1.63545572652231	0.00225201169825063			MAP1LC3B	Acute lymphocytic leukaemia	Inverse variance weighted	0.740771183800429	0.313664444323194	1.74945537079643	0.493742465725967
CMAHP	Acute Lymphoblastic Leukemia	Simple mode	1.35476516085519	0.831055314175447	2.20850358545388	0.228076782016467			MAP1LC3B	Acute lymphocytic leukaemia	Simple mode	2.25033850185233	0.347259085648884	14.5828391025577	0.42308866095219
CMAHP	Acute Lymphoblastic Leukemia	Weighted mode	1.1978851296641	0.909022247806659	1.57854088536629	0.204605595998466			MAP1LC3B	Acute lymphocytic leukaemia	Weighted mode	0.610179062899903	0.205070236983901	1.8155657021581	0.404032947310241
CMC2	Acute Lymphoblastic Leukemia	MR Egger	1.59092443847635	0.729772436221842	3.46826002643363	0.258150512606076			DAPP1	Acute lymphocytic leukaemia	MR Egger	1.80256842809324	0.00953319695731775	340.835603471341	0.861957329660204
CMC2	Acute Lymphoblastic Leukemia	Weighted median	1.97929513137811	1.26536571307254	3.09602921639501	0.00277944324732875			DAPP1	Acute lymphocytic leukaemia	Weighted median	1.87962326252977	0.268654172299462	13.1506746342466	0.524902271851827
CMC2	Acute Lymphoblastic Leukemia	Inverse variance weighted	2.11210022860822	1.43938896074802	3.09920910701485	0.00013257206986445			DAPP1	Acute lymphocytic leukaemia	Inverse variance weighted	1.78146529757312	0.290718279273471	10.9164742388693	0.532422985926502
CMC2	Acute Lymphoblastic Leukemia	Simple mode	2.30587900505706	1.09228660344873	4.86784143390122	0.0410739848226285			DAPP1	Acute lymphocytic leukaemia	Simple mode	1.65089007541861	0.120332158579348	22.6492907074255	0.74356558100653
CMC2	Acute Lymphoblastic Leukemia	Weighted mode	2.10941856206858	1.3572876257466	3.27833731450391	0.00361599615611291			DAPP1	Acute lymphocytic leukaemia	Weighted mode	2.06164122071715	0.235464730569883	18.0509603823603	0.580484965783938
CMPK1	Acute Lymphoblastic Leukemia	MR Egger	2.72067492408355	0.496774913005039	14.9002533114266	0.271116895355731			ITGAL	Acute lymphocytic leukaemia	MR Egger	0.007394212422742	2.88042757102991e-06	18.9813407920835	0.435809911507577
CMPK1	Acute Lymphoblastic Leukemia	Weighted median	2.29917854120504	0.891253701429935	5.93122020795703	0.0850886132350763			ITGAL	Acute lymphocytic leukaemia	Weighted median	1.52692735504439	0.249133052772898	9.35848182982044	0.647262007931346
CMPK1	Acute Lymphoblastic Leukemia	Inverse variance weighted	1.99547596402977	1.00512638642186	3.96162	0.0483119329504295			ITGAL	Acute lymphocytic leukaemia	Inverse variance weighted	1.57496083283703	0.286343855248606	8.66266755686837	0.601511055216537
CMPK1	Acute Lymphoblastic Leukemia	Simple mode	2.5551827719809	0.42477600023845	15.3703575403576	0.324173455031477			ITGAL	Acute lymphocytic leukaemia	Simple mode	0.460840304734776	0.0371172557529861	5.72169957502733	0.607893713573394
CMPK1	Acute Lymphoblastic Leukemia	Weighted mode	2.28360618999114	0.813324428441143	6.41177991046071	0.140957620002116			ITGAL	Acute lymphocytic leukaemia	Weighted mode	0.748905245957659	0.115442315440402	4.85834908355118	0.790445327620977
CMTM3	Acute Lymphoblastic Leukemia	MR Egger	2.43418112792614	0.765439250379549	7.74096410735886	0.151263362020742			AHSA1	Acute lymphocytic leukaemia	MR Egger	3.62514822288541	4.14038998346886e-06	3174024.59438832	0.870643525806793
CMTM3	Acute Lymphoblastic Leukemia	Weighted median	1.26978773951033	0.645047125147125	2.49960171986348	0.489432038808631			AHSA1	Acute lymphocytic leukaemia	Weighted median	1.29205207456313	0.158144539288632	10.5561568606301	0.811031746292365
CMTM3	Acute Lymphoblastic Leukemia	Inverse variance weighted	1.74078297302255	1.03180586065166	2.93691427305072	0.0377707279750048			AHSA1	Acute lymphocytic leukaemia	Inverse variance weighted	1.71327011551162	0.176757496791995	16.6063366022851	0.642221630917401
CMTM3	Acute Lymphoblastic Leukemia	Simple mode	1.55545977742777	0.423578633503632	5.7119385347252	0.514564824187199			AHSA1	Acute lymphocytic leukaemia	Simple mode	1.15904696744504	0.0469554558121789	28.6098782240999	0.933790944976659
CMTM3	Acute Lymphoblastic Leukemia	Weighted mode	1.47601133127831	0.750414588924645	2.90320774971066	0.274957310649726			AHSA1	Acute lymphocytic leukaemia	Weighted mode	1.05725672412867	0.0830582646546075	13.4579236077656	0.968478288880884
CMTM7	Acute Lymphoblastic Leukemia	MR Egger	1.26437183877842	0.700049766722696	2.28360357032898	0.442828555823068			B3GALT2	Acute lymphocytic leukaemia	MR Egger	0.209426936487772	0.0351523337021885	1.24770213261609	0.124317977686899
CMTM7	Acute Lymphoblastic Leukemia	Weighted median	1.31022980185996	0.798717638269451	2.14932292894084	0.284619191846491			B3GALT2	Acute lymphocytic leukaemia	Weighted median	0.517514162744343	0.167755196173713	1.59649843790022	0.251764539477917
CMTM7	Acute Lymphoblastic Leukemia	Inverse variance weighted	1.40828258428935	1.01352499958688	1.95679419651324	0.0413453584655966			B3GALT2	Acute lymphocytic leukaemia	Inverse variance weighted	0.669954370605622	0.265068149725816	1.69329607935865	0.397168308668402
CMTM7	Acute Lymphoblastic Leukemia	Simple mode	0.812728403399883	0.295605208316122	2.23449194774183	0.69054991153843			B3GALT2	Acute lymphocytic leukaemia	Simple mode	0.439369129989221	0.0870494525614626	2.21765015984658	0.345402138919344
CMTM7	Acute Lymphoblastic Leukemia	Weighted mode	0.812728403399883	0.405232104800737	1.62999784535266	0.563450841086998			B3GALT2	Acute lymphocytic leukaemia	Weighted mode	0.439369129989221	0.0939737287149742	2.05424680947798	0.323218932601872
CNIH	Acute Lymphoblastic Leukemia	MR Egger	0.187990906797425	0.00559022450874991	6.32185361843742	0.522442225280287			DTX3L	Acute lymphocytic leukaemia	MR Egger	0.0480746151790466	4.80154715448106e-11	48133831.664165	0.801092971533861
CNIH	Acute Lymphoblastic Leukemia	Weighted median	0.267038652011916	0.0755186423819298	0.944265408105431	0.0404625914379043			DTX3L	Acute lymphocytic leukaemia	Weighted median	2.16037984912099	0.20428627903046	22.8465715594739	0.522088287026263
CNIH	Acute Lymphoblastic Leukemia	Inverse variance weighted	0.270670496662631	0.0786087414288259	0.931989450943304	0.0382977914295878			DTX3L	Acute lymphocytic leukaemia	Inverse variance weighted	1.83259064164031	0.189799381791513	17.6944120056024	0.600569223995547
CNIH	Acute Lymphoblastic Leukemia	Simple mode	0.378430467145259	0.0527528545265375	2.71472737824523	0.435726842535245			DTX3L	Acute lymphocytic leukaemia	Simple mode	4.59436732355063	0.110626693522565	190.805766958987	0.481190988967824
CNIH	Acute Lymphoblastic Leukemia	Weighted mode	0.251463214433243	0.0583766690801347	1.08320240276637	0.205107470103383			DTX3L	Acute lymphocytic leukaemia	Weighted mode	2.87913693112412	0.0848721272173007	97.6696324217154	0.597777891921435
CNR1	Acute Lymphoblastic Leukemia	MR Egger	0.695384896533166	0.306382110227456	1.57829108875662	0.394367867073174			CHST9	Acute lymphocytic leukaemia	MR Egger	1.60416560954305	0.503212592039572	5.11383725993539	0.441208342798591
CNR1	Acute Lymphoblastic Leukemia	Weighted median	0.631044900047657	0.36350309438191	1.09550007147333	0.101861804750074			CHST9	Acute lymphocytic leukaemia	Weighted median	1.6773949527732	0.791839356289892	3.5533139458642	0.176831450337014
CNR1	Acute Lymphoblastic Leukemia	Inverse variance weighted	0.627641032191797	0.417093463179917	0.944472402629954	0.0254830473710189			CHST9	Acute lymphocytic leukaemia	Inverse variance weighted	1.20262321221641	0.629612694511706	2.29713060611556	0.576298638533793
CNR1	Acute Lymphoblastic Leukemia	Simple mode	0.651491592251069	0.246259746786296	1.72355125152534	0.396909907899997			CHST9	Acute lymphocytic leukaemia	Simple mode	1.6709547325065	0.255372443098675	10.9334025402538	0.601960525699602
CNR1	Acute Lymphoblastic Leukemia	Weighted mode	0.639459199864344	0.369359661217171	1.10707289188985	0.123970944549455			CHST9	Acute lymphocytic leukaemia	Weighted mode	1.78569601761071	0.784178706379703	4.06630560275218	0.192469424294453
CNTNAP1	Acute Lymphoblastic Leukemia	MR Egger	0.321261678615432	0.0452632755663847	2.2801943707197	0.459621329938406			FZD10	Acute lymphocytic leukaemia	MR Egger	0.525413139151565	0.0455563955518924	6.05971924356151	0.627944832440496
CNTNAP1	Acute Lymphoblastic Leukemia	Weighted median	0.333109733451313	0.0946884934364666	1.17186461092506	0.086734809508986			FZD10	Acute lymphocytic leukaemia	Weighted median	1.02783023680658	0.435378312931075	2.42647592752538	0.95005790738444
CNTNAP1	Acute Lymphoblastic Leukemia	Inverse variance weighted	0.324821934176536	0.110113523931009	0.958186471157643	0.0416110290270846			FZD10	Acute lymphocytic leukaemia	Inverse variance weighted	1.15509477281994	0.45200297295198	2.95184769578428	0.763264492535562
CNTNAP1	Acute Lymphoblastic Leukemia	Simple mode	0.263639162699556	0.0533984435090444	1.30164108804315	0.243394181017005			FZD10	Acute lymphocytic leukaemia	Simple mode	0.71801871003704	0.125443867756433	4.10981323506598	0.722570498006692
CNTNAP1	Acute Lymphoblastic Leukemia	Weighted mode	0.519436559562346	0.114741420137092	2.3514990409531	0.484769858995747			FZD10	Acute lymphocytic leukaemia	Weighted mode	0.951477536649739	0.379878720388258	2.38315402827454	0.918902103794375
CNTNAP3	Acute Lymphoblastic Leukemia	MR Egger	1.15464774654038	0.580442664000381	2.29688736076421	0.75240602164207			SMAP1	Acute lymphocytic leukaemia	MR Egger	1.04595501244099	0.414231379346363	2.64108887592423	0.926594205842815
CNTNAP3	Acute Lymphoblastic Leukemia	Weighted median	1.53036276363641	1.03163782643533	2.27018642425833	0.0344463630459732			SMAP1	Acute lymphocytic leukaemia	Weighted median	0.896743133235948	0.470770157178695	1.70815467961064	0.740274128576427
CNTNAP3	Acute Lymphoblastic Leukemia	Inverse variance weighted	1.55097164513469	1.08314334170643	2.22086306713758	0.0165738674207646			SMAP1	Acute lymphocytic leukaemia	Inverse variance weighted	0.90428729273867	0.507457812156861	1.61143544984161	0.732862694956585
CNTNAP3	Acute Lymphoblastic Leukemia	Simple mode	1.84017072384773	1.04474761005964	3.2411926673017	0.169132414849906			SMAP1	Acute lymphocytic leukaemia	Simple mode	0.281822604076251	0.0445293896900032	1.78363055773365	0.211433723791106
CNTNAP3	Acute Lymphoblastic Leukemia	Weighted mode	1.40048083806624	0.897715974852596	2.18481862051387	0.27597302059558			SMAP1	Acute lymphocytic leukaemia	Weighted mode	0.889743547447691	0.456567350300349	1.73390317924404	0.739340413792104
CNTROB	Acute Lymphoblastic Leukemia	MR Egger	1.46603423065964	0.653818283905648	3.28723808796995	0.367807164965299			EVL	Acute lymphocytic leukaemia	MR Egger	0.608735782139964	0.0209325496712002	17.7025378311837	0.784408874259972
CNTROB	Acute Lymphoblastic Leukemia	Weighted median	0.90417376999681	0.543008068235437	1.50555811998686	0.698599714617101			EVL	Acute lymphocytic leukaemia	Weighted median	1.14967287965678	0.468818852813182	2.81931437331728	0.760547996910321
CNTROB	Acute Lymphoblastic Leukemia	Inverse variance weighted	0.685093573075744	0.471406913684387	0.99564344570459	0.0473795847774174			EVL	Acute lymphocytic leukaemia	Inverse variance weighted	1.23972782866238	0.54039729158517	2.84406512225777	0.61198212564308
CNTROB	Acute Lymphoblastic Leukemia	Simple mode	0.408425603529309	0.15048782379428	1.10847156542256	0.0978870502078887			EVL	Acute lymphocytic leukaemia	Simple mode	1.44308303914677	0.260937186991386	7.98080442992525	0.688874075308483
CNTROB	Acute Lymphoblastic Leukemia	Weighted mode	0.950723791376462	0.559447002518073	1.61565925533766	0.854184700026349			EVL	Acute lymphocytic leukaemia	Weighted mode	1.13514304394245	0.40747144928751	3.16230678852236	0.816472812906478
[truncated: 61,296 more rows]
