# Supplementary material for: Study on the Gene Regulatory Effects in Leukemia Based on Multi-omics Mendelian Randomization, Network Pharmacology, and Functional Validation
Source: Research Square preprint supplement (doi:10.21203/rs.3.rs-7510513/v1), 2025-09-25
Supplement: Supplementary file 4 [file 88bb54937f05427f54e02359.xlsx]

## Sheet: Supplementary Table 1
Supplementary Table 1. Dataset information included in MR studies
Trait	Ncase	Ncontrol	Sample_Size	Year	Consortium	Sex	Population
cis-eQTL	NA	NA	31684	2021	eQTLGen	Males and Females	European
cis-pQTL	NA	NA	4907	2021	deCODE	Males and Females	European
Acute lymphocytic leukaemia (controls excluding all cancers)	214	345117	345331	2024	FINNGEN	Males and Females	European
Acute myeloid leukaemia (controls excluding all cancers)	321	345117	345438	2024	FINNGEN	Males and Females	European
Chronic lymphocytic leukaemia (controls excluding all cancers)	851	345110	345961	2024	FINNGEN	Males and Females	European
Chronic myeloid leukaemia (controls excluding all cancers)	134	345117	345251	2024	FINNGEN	Males and Females	European
Note: Trait, Phenotype of the dataset; Ncase, Number of cases; Ncontrol, Number of controls; Nsnp, Number of available SNPs.
