# Supplementary material for: Study on the Gene Regulatory Effects in Leukemia Based on Multi-omics Mendelian Randomization, Network Pharmacology, and Functional Validation
Source: Research Square preprint supplement (doi:10.21203/rs.3.rs-7510513/v1), 2025-09-25
Supplement: Supplementary file 5 [file 91dbdbb63a939d9cd4a6e580.xlsx]

## Sheet: Supplementary Table 7
Supplementary Table 7. SMR results
ProbeChr	gene	outcome	Probe_bp	topSNP	topSNP_chr	topSNP_bp	A1	A2	Freq	b_GWAS	se_GWAS	p_GWAS	b_eQTL	se_eQTL	p_eQTL	b_SMR	se_SMR	p_SMR	p_HEIDI	nsnp_HEIDI	or	or_lci95	or_uci95
5	ISOC1	Chronic Myeloid Leukemia	128430444	rs2577481	5	128257893	C	T	0.362823	0.172605	0.13368	0.196641	-0.276017	0.0320549	7.257371e-18	-0.625342	0.489733	0.201636	0.0856867	20	0.535078400410027	0.20490298003344	1.39729004692186
19	IGFLR1	Chronic Myeloid Leukemia	36230058	rs12459634	19	36230174	C	T	0.157058	-0.548092	0.225704	0.015167	-0.241201	0.0218436	2.391588e-28	2.27235	0.958112	0.0177069	0.0541467	20	9.70217415418006	1.48356871620067	63.4498303247497
12	CLEC1B	Chronic Lymphocytic Leukemia	10138241	rs12230638	12	10117864	C	T	0.213718	-0.142601	0.0572563	0.0127535	0.401029	0.0275591	5.703658e-48	-0.355588	0.14485	0.0140933	0.440364	20	0.700761274413467	0.527559301523923	0.930826851690565
13	DOCK9	Chronic Lymphocytic Leukemia	99445741	rs9517578	13	99712485	G	A	0.304175	-0.0732513	0.0529855	0.166825	0.21155	0.0244871	5.659188e-18	-0.34626	0.25365	0.172218	0.878046	20	0.707328557771704	0.430239176720019	1.16287338696955
