# Supplementary material for: Study on the Gene Regulatory Effects in Leukemia Based on Multi-omics Mendelian Randomization, Network Pharmacology, and Functional Validation
Source: Research Square preprint supplement (doi:10.21203/rs.3.rs-7510513/v1), 2025-09-25
Supplement: Supplementary file 6 [file b9196c795b3b58a8f8bb86b6.xlsx]

## Sheet: Sheet1
Supplementary Table 3.2 SNP information included in MR studies
Exposure-pQTL	Outcome	SNP	Chr	Pos	EA	OA	Eaf.exposure	Beta.exposure	Se.exposure	Pval.exposure	Eaf.outcome	Beta.outcome	Pval.outcome
CRYBB2	Acute lymphocytic leukaemia	rs203688	chr1	196703255	A	G	0.39961	-0.0801	0.007997	1.29e-23	0.560935	-0.00448104	0.963193
CRYBB2	Acute lymphocytic leukaemia	rs2337918	chr14	106591745	G	A	0.38045	0.045	0.008239	4.719e-08	0.327009	-0.211483	0.0463298
CRYBB2	Acute lymphocytic leukaemia	rs2932738	chr2	88978279	G	C	0.22787	-0.0632	0.009354	1.416e-11	0.126115	-0.0364759	0.806444
CRYBB2	Acute lymphocytic leukaemia	rs6457457	chr6	31910331	T	C	0.06527	0.092	0.015867	6.706e-09	0.148073	-0.182907	0.182026
CRYBB2	Acute lymphocytic leukaemia	rs697356	chr3	165718150	C	G	0.36502	0.0467	0.00813	9.253e-09	0.322253	0.135682	0.190749
RAF1	Acute lymphocytic leukaemia	rs11601665	chr11	262930	T	C	0.26367	0.0528	0.009071	5.861e-09	0.356766	-0.134194	0.188466
RAF1	Acute lymphocytic leukaemia	rs1354034	chr3	56815721	C	T	0.38119	0.0589	0.008244	9.05e-13	0.704977	-0.125325	0.242803
RAF1	Acute lymphocytic leukaemia	rs79041741	chr16	84473930	C	A	0.05177	-0.0993	0.018179	4.701e-08	0.0428163	0.00535854	0.98239
RAF1	Acute lymphocytic leukaemia	rs9971407	chr11	65130754	T	C	0.24858	-0.0523	0.00928	1.742e-08	0.22347	-0.003016	0.979434
ZNF41	Acute lymphocytic leukaemia	rs1042133	chr6	33080829	C	G	0.17192	-0.0623	0.01047	2.673e-09	0.156431	-0.0720599	0.588741
ZNF41	Acute lymphocytic leukaemia	rs117125720	chr6	32613313	A	T	0.04891	-0.1727	0.018135	1.684e-21	0.0980901	-0.0557438	0.73313
ZNF41	Acute lymphocytic leukaemia	rs1706435	chr3	165743688	G	A	0.36981	0.078	0.008092	5.483e-22	0.311721	0.153164	0.141768
ZNF41	Acute lymphocytic leukaemia	rs368465	chr1	196702851	C	T	0.39961	-0.1019	0.007984	2.643e-37	0.560966	-0.00452725	0.962808
GUCA1A	Acute lymphocytic leukaemia	rs10800448	chr1	169491168	G	A	0.12252	-0.0798	0.012035	3.342e-11	0.767204	-0.0475706	0.683068
GUCA1A	Acute lymphocytic leukaemia	rs115977231	chr1	169097491	A	G	0.01907	-0.2245	0.028396	2.657e-15	0.0143335	-0.368001	0.359449
GUCA1A	Acute lymphocytic leukaemia	rs12765810	chr10	19927245	A	G	0.28052	0.0738	0.008796	4.866e-17	0.233734	-0.260057	0.0228555
GUCA1A	Acute lymphocytic leukaemia	rs2239853	chr1	169556528	C	T	0.44202	-0.077	0.008014	7.37e-22	0.613273	0.0375891	0.708035
GUCA1A	Acute lymphocytic leukaemia	rs3020644	chr6	31926849	G	A	0.37454	-0.0475	0.008167	6.03e-09	0.361016	-0.0407403	0.688034
GUCA1A	Acute lymphocytic leukaemia	rs61806985	chr1	169330603	T	C	0.07704	-0.456	0.014532	1e-200	0.0484289	-0.36859	0.105757
GUCA1A	Acute lymphocytic leukaemia	rs62140549	chr2	46914826	G	A	0.30898	0.0526	0.008538	7.252e-10	0.315841	-0.157934	0.132535
GUCA1A	Acute lymphocytic leukaemia	rs892145	chr19	15475861	T	A	0.37729	-0.0541	0.00813	2.841e-11	0.393955	-0.142204	0.151961
OCRL	Acute lymphocytic leukaemia	rs10922098	chr1	196695521	T	C	0.40011	-0.1887	0.008096	3.7e-120	0.561049	-0.00464965	0.961802
OCRL	Acute lymphocytic leukaemia	rs145439832	chr1	195058235	A	T	0.03851	-0.1154	0.021062	4.278e-08	0.0112039	-0.620693	0.194779
OCRL	Acute lymphocytic leukaemia	rs1706435	chr3	165743688	G	A	0.36981	0.0684	0.008242	1.054e-16	0.311721	0.153164	0.141768
OCRL	Acute lymphocytic leukaemia	rs444921	chr6	31964400	T	C	0.13897	0.1537	0.011463	5.403e-41	0.0767023	0.074568	0.686358
OCRL	Acute lymphocytic leukaemia	rs555007	chr6	31882555	C	T	0.07832	0.1394	0.014822	5.199e-21	0.158514	-0.179443	0.177966
OCRL	Acute lymphocytic leukaemia	rs704	chr17	28367840	A	G	0.49189	0.191	0.007932	3.993e-128	0.419906	-0.192181	0.050501
SPDEF	Acute lymphocytic leukaemia	rs10922098	chr1	196695521	T	C	0.40011	-0.2135	0.008076	5.017e-154	0.561049	-0.00464965	0.961802
SPDEF	Acute lymphocytic leukaemia	rs1265941	chr6	31904575	C	A	0.07271	0.1344	0.015288	1.479e-18	0.151525	-0.170495	0.20855
SPDEF	Acute lymphocytic leukaemia	rs1707652	chr3	165761011	T	C	0.3102	0.0987	0.008574	1.157e-30	0.248628	0.196937	0.0791043
SPDEF	Acute lymphocytic leukaemia	rs35351085	chr1	197992799	T	C	0.04877	0.1103	0.018372	1.93e-09	0.0654955	-0.0206492	0.916465
SPDEF	Acute lymphocytic leukaemia	rs550671	chr6	31976816	T	C	0.14045	0.1572	0.011407	3.312e-43	0.0767293	0.074595	0.686148
SPDEF	Acute lymphocytic leukaemia	rs9276606	chr6	32768918	T	A	0.28354	0.051	0.008856	8.473e-09	0.241072	0.00253749	0.982151
SNAI2	Acute lymphocytic leukaemia	rs10922098	chr1	196695521	T	C	0.40011	-0.1014	0.008057	2.547e-36	0.561049	-0.00464965	0.961802
SNAI2	Acute lymphocytic leukaemia	rs1706435	chr3	165743688	G	A	0.36981	0.0541	0.008176	3.664e-11	0.311721	0.153164	0.141768
SNAI2	Acute lymphocytic leukaemia	rs34927613	chr6	32632434	A	G	0.29339	0.0509	0.0086	3.25e-09	0.32891	-0.0342339	0.742169
SNAI2	Acute lymphocytic leukaemia	rs444921	chr6	31964400	T	C	0.13897	0.0755	0.011387	3.348e-11	0.0767023	0.074568	0.686358
KCNAB2	Acute lymphocytic leukaemia	rs10922098	chr1	196695521	T	C	0.40011	-0.045	0.008042	2.199e-08	0.561049	-0.00464965	0.961802
KCNAB2	Acute lymphocytic leukaemia	rs557011	chr6	32619236	T	C	0.40141	0.0462	0.008026	8.602e-09	0.351361	0.0512858	0.614755
KCNAB2	Acute lymphocytic leukaemia	rs806109	chr1	5992521	A	G	0.21513	0.08	0.009576	6.573e-17	0.788652	0.00129688	0.991357
VDR	Acute lymphocytic leukaemia	rs10922098	chr1	196695521	T	C	0.40011	-0.1527	0.008104	3.381e-79	0.561049	-0.00464965	0.961802
VDR	Acute lymphocytic leukaemia	rs13469	chr17	28349109	T	C	0.45244	-0.0439	0.007996	4.008e-08	0.450445	-0.12751	0.190094
VDR	Acute lymphocytic leukaemia	rs2686395	chr3	165767231	C	T	0.3101	-0.0904	0.00858	5.853e-26	0.75359	-0.197297	0.0795353
VDR	Acute lymphocytic leukaemia	rs7774739	chr6	32041524	G	A	0.17585	0.0956	0.011102	7.237e-18	0.00283685	-0.0834957	0.932347
VDR	Acute lymphocytic leukaemia	rs9267139	chr6	31471721	A	G	0.10872	0.073	0.012701	9.046e-09	0.182723	-0.161392	0.202138
HOGA1	Acute lymphocytic leukaemia	rs10922098	chr1	196695521	T	C	0.40011	-0.1268	0.007999	1.347e-56	0.561049	-0.00464965	0.961802
HOGA1	Acute lymphocytic leukaemia	rs1707652	chr3	165761011	T	C	0.3102	0.0568	0.008477	2.074e-11	0.248628	0.196937	0.0791043
HOGA1	Acute lymphocytic leukaemia	rs7774739	chr6	32041524	G	A	0.17585	0.0848	0.010955	9.91e-15	0.00283685	-0.0834957	0.932347
HOGA1	Acute lymphocytic leukaemia	rs9267139	chr6	31471721	A	G	0.10872	0.0696	0.012521	2.72e-08	0.182723	-0.161392	0.202138
HOGA1	Acute lymphocytic leukaemia	rs9271683	chr6	32625173	T	C	0.27332	0.0505	0.008759	8.127e-09	0.754506	0.055393	0.623116
DUSP4	Acute lymphocytic leukaemia	rs11794541	chr9	21673751	A	T	0.05959	-0.0943	0.016397	8.862e-09	0.104318	-0.00626534	0.968834
DUSP4	Acute lymphocytic leukaemia	rs1707652	chr3	165761011	T	C	0.3102	0.0632	0.008547	1.421e-13	0.248628	0.196937	0.0791043
DUSP4	Acute lymphocytic leukaemia	rs6457457	chr6	31910331	T	C	0.06527	0.0998	0.016036	4.867e-10	0.148073	-0.182907	0.182026
DUSP4	Acute lymphocytic leukaemia	rs6542680	chr2	3592552	T	C	0.18362	-0.0748	0.010246	2.863e-13	0.648336	-0.149514	0.147278
ZHX3	Acute lymphocytic leukaemia	rs10982054	chr9	114071373	A	G	0.27709	-0.0642	0.009128	2.012e-12	0.323166	0.073336	0.478444
ZHX3	Acute lymphocytic leukaemia	rs62068364	chr16	89690791	T	C	0.33982	-0.058	0.008576	1.35e-11	0.272233	0.0848768	0.436356
ZHX3	Acute lymphocytic leukaemia	rs6457457	chr6	31910331	T	C	0.06527	0.167	0.016493	4.246e-24	0.148073	-0.182907	0.182026
ZHX3	Acute lymphocytic leukaemia	rs6458	chr6	32039847	G	A	0.12614	0.1716	0.012337	5.545e-44	0.0776627	0.165876	0.366967
SIGLEC12	Acute lymphocytic leukaemia	rs1042663	chr6	31937353	A	G	0.09002	0.0915	0.013954	5.472e-11	0.0648629	0.00130871	0.994773
SIGLEC12	Acute lymphocytic leukaemia	rs111972944	chr19	52240266	A	G	0.19572	0.0946	0.010753	1.396e-18	0.106171	-0.00440004	0.977821
SIGLEC12	Acute lymphocytic leukaemia	rs112735728	chr19	51584096	C	T	0.03053	0.6947	0.025152	6.394e-168	0.0106459	-0.170292	0.713011
SIGLEC12	Acute lymphocytic leukaemia	rs117391293	chr19	52445049	G	A	0.0146	0.2591	0.0347	8.218e-14	0.019715	0.187574	0.594822
SIGLEC12	Acute lymphocytic leukaemia	rs12971607	chr19	52578482	T	C	0.0553	-0.1242	0.018723	3.28e-11	0.0397111	0.227363	0.355036
SIGLEC12	Acute lymphocytic leukaemia	rs139978289	chr19	53197588	A	C	0.03714	0.1298	0.022342	6.261e-09	0.00587424	-0.14567	0.821532
SIGLEC12	Acute lymphocytic leukaemia	rs140987580	chr19	51425408	G	A	0.04666	0.6046	0.019919	1e-200	0.0265342	-0.440424	0.147106
SIGLEC12	Acute lymphocytic leukaemia	rs190502932	chr19	51136702	T	A	0.01039	0.5796	0.041996	2.499e-43	0.000948752	-1.2132	0.498146
SIGLEC12	Acute lymphocytic leukaemia	rs368465	chr1	196702851	C	T	0.39961	-0.0879	0.008179	6.117e-27	0.560966	-0.00452725	0.962808
SIGLEC12	Acute lymphocytic leukaemia	rs61998206	chr19	51481484	T	C	0.04997	-0.1777	0.019651	1.525e-19	0.0270786	0.519501	0.0859666
SIGLEC12	Acute lymphocytic leukaemia	rs73052899	chr19	51668230	T	C	0.28094	0.1353	0.009454	1.846e-46	0.337489	-0.22141	0.0309678
SIGLEC12	Acute lymphocytic leukaemia	rs79506121	chr19	51447126	C	T	0.031	0.7506	0.024499	1e-200	0.0358612	-0.0970355	0.711191
HNF4A	Acute lymphocytic leukaemia	rs28366149	chr6	31607123	A	G	0.18987	0.1307	0.010656	1.398e-34	0.302844	-0.0789365	0.457002
HNF4A	Acute lymphocytic leukaemia	rs28616789	chr9	114070709	A	G	0.2772	-0.0936	0.009379	1.869e-23	0.323176	0.0732921	0.478809
HNF4A	Acute lymphocytic leukaemia	rs56294298	chr9	114371244	A	G	0.1216	-0.0743	0.012836	7.104e-09	0.0551224	0.0638515	0.766205
HNF4A	Acute lymphocytic leukaemia	rs61747728	chr1	179557079	T	C	0.04262	0.1432	0.020569	3.359e-12	0.0632719	0.170634	0.395284
HNF4A	Acute lymphocytic leukaemia	rs6458	chr6	32039847	G	A	0.12614	0.2145	0.012679	3.308e-64	0.0776627	0.165876	0.366967
HNF4A	Acute lymphocytic leukaemia	rs9501342	chr6	30904955	A	G	0.19318	0.0581	0.010602	4.246e-08	0.25897	0.0497764	0.653129
WNT10A	Acute lymphocytic leukaemia	rs10922098	chr1	196695521	T	C	0.40011	-0.1782	0.008016	1.793e-109	0.561049	-0.00464965	0.961802
WNT10A	Acute lymphocytic leukaemia	rs12478841	chr2	27588855	G	A	0.21569	0.0581	0.009503	9.73e-10	0.279299	-0.0775535	0.474464
WNT10A	Acute lymphocytic leukaemia	rs1265941	chr6	31904575	C	A	0.07271	0.1206	0.015143	1.668e-15	0.151525	-0.170495	0.20855
WNT10A	Acute lymphocytic leukaemia	rs1697422	chr1	21495404	C	T	0.48923	-0.0443	0.007935	2.363e-08	0.542115	0.00943428	0.923194
WNT10A	Acute lymphocytic leukaemia	rs1707652	chr3	165761011	T	C	0.3102	0.0861	0.008496	3.914e-24	0.248628	0.196937	0.0791043
WNT10A	Acute lymphocytic leukaemia	rs550671	chr6	31976816	T	C	0.14045	0.1356	0.011308	3.934e-33	0.0767293	0.074595	0.686148
BIRC2	Acute lymphocytic leukaemia	rs116490500	chr19	45617246	A	C	0.01553	0.1982	0.034042	5.808e-09	0.0100866	-0.352972	0.456438
BIRC2	Acute lymphocytic leukaemia	rs117909986	chr19	46229036	A	G	0.01711	0.1935	0.032087	1.634e-09	0.00487631	-0.113043	0.867585
BIRC2	Acute lymphocytic leukaemia	rs118004808	chr19	44936241	T	C	0.03208	0.1656	0.023908	4.312e-12	0.0128757	-0.449782	0.306473
BIRC2	Acute lymphocytic leukaemia	rs118147862	chr19	44816374	A	G	0.03917	0.9196	0.017944	1e-200	0.0289659	-0.0822124	0.778443
BIRC2	Acute lymphocytic leukaemia	rs143675675	chr19	46029507	A	G	0.01844	0.2452	0.031833	1.332e-14	0.0131285	-0.247298	0.578869
BIRC2	Acute lymphocytic leukaemia	rs147910350	chr19	45643504	T	C	0.01351	0.2935	0.037782	7.959e-15	0.00914451	0.258449	0.609373
BIRC2	Acute lymphocytic leukaemia	rs1619994	chr3	165744047	G	A	0.2807	0.0682	0.009357	3.127e-13	0.253862	0.203883	0.0647739
BIRC2	Acute lymphocytic leukaemia	rs7254892	chr19	44886339	A	G	0.01741	1.0917	0.031748	1e-200	0.0216589	0.186346	0.577813
NCF2	Acute lymphocytic leukaemia	rs112963922	chr14	94411531	T	C	0.01119	0.5479	0.037882	2.063e-47	0.0313888	-0.255379	0.360445
NCF2	Acute lymphocytic leukaemia	rs118020353	chr14	91380092	T	C	0.01079	0.2199	0.039189	2.009e-08	0.00798674	-0.415782	0.461269
NCF2	Acute lymphocytic leukaemia	rs141947817	chr14	94002725	T	C	0.03085	0.1352	0.023941	1.63e-08	0.01278	-0.341525	0.410888
NCF2	Acute lymphocytic leukaemia	rs145496844	chr14	94006387	G	C	0.02117	1.0376	0.022663	1e-200	0.00139359	2.02381	0.00133783
NCF2	Acute lymphocytic leukaemia	rs148317773	chr14	95960529	T	C	0.0284	0.1873	0.024326	1.365e-14	0.0223479	-0.00806172	0.980861
NCF2	Acute lymphocytic leukaemia	rs201028957	chr14	92518925	CATCAG	C	0.02924	0.2007	0.024618	3.558e-16	0.0124689	0.0282417	0.948543
NCF2	Acute lymphocytic leukaemia	rs55698602	chr14	94626820	T	C	0.09533	0.1785	0.013914	1.129e-37	0.108019	-0.0896488	0.59096
NCF2	Acute lymphocytic leukaemia	rs7153367	chr14	94995841	C	G	0.01232	0.2559	0.037098	5.275e-12	0.0289008	0.25052	0.396451
NCF2	Acute lymphocytic leukaemia	rs72704666	chr14	94968526	G	A	0.02478	0.2835	0.026405	6.842e-27	0.00988916	-0.0958643	0.842552
NCF2	Acute lymphocytic leukaemia	rs76492422	chr14	93892878	G	A	0.02124	0.1602	0.027264	4.207e-09	0.0314609	-0.160119	0.572662
CBFB	Acute lymphocytic leukaemia	rs1355538	chr3	165787389	G	A	0.39847	-0.0644	0.008096	1.804e-15	0.672107	-0.150672	0.144439
CBFB	Acute lymphocytic leukaemia	rs16919431	chr10	19853771	G	T	0.23714	0.0528	0.009365	1.721e-08	0.284079	0.010134	0.925211
CBFB	Acute lymphocytic leukaemia	rs34927613	chr6	32632434	A	G	0.29339	0.0549	0.008644	2.134e-10	0.32891	-0.0342339	0.742169
CBFB	Acute lymphocytic leukaemia	rs7535409	chr1	169537003	G	A	0.33792	-0.0629	0.008376	5.947e-14	0.306889	0.0246756	0.814482
ILK	Acute lymphocytic leukaemia	rs342200	chr7	106676033	A	G	0.42559	-0.0462	0.008214	1.862e-08	0.928885	-0.0350435	0.853556
ILK	Acute lymphocytic leukaemia	rs4980320	chr11	198986	C	T	0.46986	0.0473	0.008172	7.125e-09	0.479149	0.0357157	0.716015
ILK	Acute lymphocytic leukaemia	rs802171	chr10	16814686	G	A	0.47349	0.1878	0.008108	1.078e-118	0.564614	-0.00838317	0.931919
FOXM1	Acute lymphocytic leukaemia	rs10876550	chr12	54318524	A	G	0.43699	0.0733	0.008172	2.964e-19	0.677995	0.0442492	0.67157
FOXM1	Acute lymphocytic leukaemia	rs117828578	chr13	40645935	A	G	0.02463	0.1983	0.025474	7.009e-15	0.0156472	-0.204985	0.595821
FOXM1	Acute lymphocytic leukaemia	rs1354034	chr3	56815721	C	T	0.38119	-0.0612	0.00832	1.894e-13	0.704977	-0.125325	0.242803
FOXM1	Acute lymphocytic leukaemia	rs342292	chr7	106730198	G	C	0.45188	-0.0711	0.008089	1.504e-18	0.481758	-8.32414e-05	0.999317
FANCL	Acute lymphocytic leukaemia	rs1706420	chr3	165732681	C	T	0.36627	0.0614	0.008193	6.674e-14	0.311243	0.155336	0.136526
FANCL	Acute lymphocytic leukaemia	rs572515	chr1	196677131	G	A	0.3973	-0.1073	0.008072	2.563e-40	0.561231	-0.00508186	0.95827
FANCL	Acute lymphocytic leukaemia	rs7774739	chr6	32041524	G	A	0.17585	0.0755	0.01103	7.638e-12	0.00283685	-0.0834957	0.932347
RBBP9	Acute lymphocytic leukaemia	rs1355538	chr3	165787389	G	A	0.39847	-0.0783	0.008172	9.605e-22	0.672107	-0.150672	0.144439
RBBP9	Acute lymphocytic leukaemia	rs5167	chr19	44945208	G	T	0.3238	0.058	0.008589	1.45e-11	0.415523	-0.0498506	0.61584
RBBP9	Acute lymphocytic leukaemia	rs6457457	chr6	31910331	T	C	0.06527	0.0933	0.016224	8.89e-09	0.148073	-0.182907	0.182026
RBBP9	Acute lymphocytic leukaemia	rs6458	chr6	32039847	G	A	0.12614	0.0962	0.012153	2.461e-15	0.0776627	0.165876	0.366967
RBBP9	Acute lymphocytic leukaemia	rs6993770	chr8	105569300	T	A	0.22448	-0.0566	0.009635	4.242e-09	0.223119	0.0374289	0.74915
ACBD6	Acute lymphocytic leukaemia	rs1354034	chr3	56815721	C	T	0.38119	0.0802	0.008408	1.441e-21	0.704977	-0.125325	0.242803
ACBD6	Acute lymphocytic leukaemia	rs4980320	chr11	198986	C	T	0.46986	0.0458	0.008197	2.308e-08	0.479149	0.0357157	0.716015
ACBD6	Acute lymphocytic leukaemia	rs7595829	chr2	119341268	A	G	0.49092	-0.0461	0.008207	1.942e-08	0.537731	-0.144844	0.136975
BAG3	Acute lymphocytic leukaemia	rs1707652	chr3	165761011	T	C	0.3102	0.0806	0.008509	2.744e-21	0.248628	0.196937	0.0791043
BAG3	Acute lymphocytic leukaemia	rs7774739	chr6	32041524	G	A	0.17585	0.0854	0.010997	8.1e-15	0.00283685	-0.0834957	0.932347
BAG3	Acute lymphocytic leukaemia	rs9267139	chr6	31471721	A	G	0.10872	0.0805	0.012581	1.567e-10	0.182723	-0.161392	0.202138
SATB2	Acute lymphocytic leukaemia	rs10922098	chr1	196695521	T	C	0.40011	-0.2126	0.008128	8.657e-151	0.561049	-0.00464965	0.961802
SATB2	Acute lymphocytic leukaemia	rs1451915	chr1	196058002	A	C	0.13641	0.0678	0.011604	5.139e-09	0.103898	0.0553784	0.73219
SATB2	Acute lymphocytic leukaemia	rs1707652	chr3	165761011	T	C	0.3102	0.0868	0.008632	8.653e-24	0.248628	0.196937	0.0791043
SATB2	Acute lymphocytic leukaemia	rs550671	chr6	31976816	T	C	0.14045	0.1503	0.011483	3.798e-39	0.0767293	0.074595	0.686148
SATB2	Acute lymphocytic leukaemia	rs555007	chr6	31882555	C	T	0.07832	0.1242	0.014902	7.779e-17	0.158514	-0.179443	0.177966
SATB2	Acute lymphocytic leukaemia	rs6542680	chr2	3592552	T	C	0.18362	-0.0801	0.010366	1.097e-14	0.648336	-0.149514	0.147278
NEFL	Acute lymphocytic leukaemia	rs148352823	chr19	45497835	C	T	0.12163	0.1158	0.013849	6.19e-17	0.167801	0.0286299	0.826852
NEFL	Acute lymphocytic leukaemia	rs1535	chr11	61830500	G	A	0.38792	-0.0565	0.008705	8.559e-11	0.413971	-0.0855472	0.385332
NEFL	Acute lymphocytic leukaemia	rs1707652	chr3	165761011	T	C	0.3102	0.0589	0.009161	1.278e-10	0.248628	0.196937	0.0791043
NEFL	Acute lymphocytic leukaemia	rs3745150	chr19	44882502	C	G	0.41141	0.347	0.006591	1e-200	0.44144	-0.090154	0.35938
NEFL	Acute lymphocytic leukaemia	rs416116	chr19	44863088	A	G	0.38705	-0.1619	0.009266	2.302e-68	0.537541	0.0518127	0.595864
NEFL	Acute lymphocytic leukaemia	rs58258919	chr19	44536637	G	T	0.08292	-0.1494	0.016408	8.598e-20	0.0771846	0.00765591	0.966275
NEFL	Acute lymphocytic leukaemia	rs76594250	chr19	41024051	G	A	0.1148	0.095	0.014232	2.474e-11	0.154905	-0.0798976	0.552593
NEFL	Acute lymphocytic leukaemia	rs780093	chr2	27519736	C	T	0.34157	-0.0499	0.008973	2.679e-08	0.647653	0.123936	0.223132
NEFL	Acute lymphocytic leukaemia	rs79471478	chr19	47315436	A	C	0.07253	0.0961	0.017501	3.996e-08	0.0728626	0.32464	0.084489
NEFL	Acute lymphocytic leukaemia	rs8103315	chr19	44750911	A	C	0.17275	-0.3586	0.011815	1e-200	0.187369	0.454888	2.25528e-05
STAR	Acute lymphocytic leukaemia	rs11627993	chr14	100824126	A	C	0.25265	-0.0512	0.009249	3.101e-08	0.324221	-0.236075	0.0243551
STAR	Acute lymphocytic leukaemia	rs28366149	chr6	31607123	A	G	0.18987	0.0726	0.010273	1.579e-12	0.302844	-0.0789365	0.457002
STAR	Acute lymphocytic leukaemia	rs6445035	chr3	165762312	A	G	0.1904	0.0832	0.010252	4.834e-16	0.176283	0.234745	0.0632135
STAR	Acute lymphocytic leukaemia	rs6458	chr6	32039847	G	A	0.12614	0.1211	0.012227	3.992e-23	0.0776627	0.165876	0.366967
APRT	Acute lymphocytic leukaemia	rs112783573	chr16	88663301	A	G	0.02074	-0.5078	0.028958	7.617e-69	0.0302289	-0.140808	0.626801
APRT	Acute lymphocytic leukaemia	rs11640986	chr16	88958042	A	G	0.06811	-0.1447	0.016175	3.689e-19	0.0740666	-0.0748973	0.683353
APRT	Acute lymphocytic leukaemia	rs117132636	chr16	87472118	C	G	0.02609	-0.185	0.025533	4.306e-13	0.0170519	-0.616764	0.097636
APRT	Acute lymphocytic leukaemia	rs2272435	chr16	88881573	T	C	0.03126	-0.445	0.023622	3.685e-79	0.0217286	0.291556	0.398969
APRT	Acute lymphocytic leukaemia	rs33992624	chr16	87839836	G	C	0.0335	-0.1631	0.022771	7.923e-13	0.0312886	-0.273606	0.329513
APRT	Acute lymphocytic leukaemia	rs78016521	chr16	89562551	T	C	0.03025	-0.3269	0.023894	1.31e-42	0.0155649	0.479852	0.221677
ENO2	Acute lymphocytic leukaemia	rs10761739	chr10	63302248	C	G	0.43566	0.0802	0.008256	2.627e-22	0.384451	-0.129103	0.195095
ENO2	Acute lymphocytic leukaemia	rs12313283	chr12	8363333	A	G	0.07132	0.0893	0.016034	2.554e-08	0.13184	-0.139622	0.345942
ENO2	Acute lymphocytic leukaemia	rs185781160	chr12	7561802	C	G	0.02241	0.2042	0.027558	1.265e-13	0.00415121	-0.111263	0.889788
ENO2	Acute lymphocytic leukaemia	rs2239165	chr12	6914702	C	T	0.28884	0.1562	0.009027	4.468e-67	0.245739	0.0375704	0.739231
ENO2	Acute lymphocytic leukaemia	rs4734879	chr8	105570896	G	A	0.21866	-0.148	0.009929	2.999e-50	0.220739	0.051316	0.662159
ENO2	Acute lymphocytic leukaemia	rs60757417	chr9	132989049	G	C	0.07243	-0.0905	0.015852	1.136e-08	0.0954664	0.0847304	0.609968
ENO2	Acute lymphocytic leukaemia	rs6580981	chr12	54329244	A	G	0.47567	-0.0512	0.008224	4.793e-10	0.582513	0.059964	0.543024
IL10RA	Acute lymphocytic leukaemia	rs1047286	chr19	6713251	A	G	0.24066	-0.052	0.009322	2.432e-08	0.174618	0.0768747	0.545999
IL10RA	Acute lymphocytic leukaemia	rs10733084	chr1	196181819	C	T	0.1337	-0.0663	0.011727	1.571e-08	0.78528	0.218269	0.0649711
IL10RA	Acute lymphocytic leukaemia	rs10801660	chr1	198272225	A	G	0.11574	0.0745	0.012448	2.168e-09	0.112625	-0.377509	0.0135672
IL10RA	Acute lymphocytic leukaemia	rs111696008	chr2	216622986	A	G	0.02443	-0.1579	0.026499	2.544e-09	0.0147953	-0.259231	0.513244
IL10RA	Acute lymphocytic leukaemia	rs1265941	chr6	31904575	C	A	0.07271	0.1683	0.01534	5.257e-28	0.151525	-0.170495	0.20855
IL10RA	Acute lymphocytic leukaemia	rs1329424	chr1	196677046	G	T	0.39735	-0.2691	0.008091	1e-200	0.561252	-0.0051467	0.95774
IL10RA	Acute lymphocytic leukaemia	rs1707652	chr3	165761011	T	C	0.3102	0.1283	0.008597	2.326e-50	0.248628	0.196937	0.0791043
IL10RA	Acute lymphocytic leukaemia	rs550671	chr6	31976816	T	C	0.14045	0.2027	0.011435	2.614e-70	0.0767293	0.074595	0.686148
IL10RA	Acute lymphocytic leukaemia	rs704	chr17	28367840	A	G	0.49189	0.1033	0.007976	2.327e-38	0.419906	-0.192181	0.050501
STAT3	Acute lymphocytic leukaemia	rs12150483	chr17	42449102	A	G	0.30205	0.0495	0.008866	2.361e-08	0.35871	-0.0792039	0.43441
STAT3	Acute lymphocytic leukaemia	rs1354034	chr3	56815721	C	T	0.38119	0.0683	0.008354	2.948e-16	0.704977	-0.125325	0.242803
STAT3	Acute lymphocytic leukaemia	rs185009887	chr17	5848332	A	G	0.02519	-0.1445	0.026371	4.264e-08	0.00967934	0.706444	0.160631
STAT3	Acute lymphocytic leukaemia	rs342200	chr7	106676033	A	G	0.42559	-0.0455	0.008174	2.6e-08	0.928885	-0.0350435	0.853556
STAT3	Acute lymphocytic leukaemia	rs4796791	chr17	42378745	C	T	0.41138	0.1541	0.008237	4.286e-78	0.617691	-0.122314	0.219779
STAT3	Acute lymphocytic leukaemia	rs4980320	chr11	198986	C	T	0.46986	0.0584	0.008132	6.914e-13	0.479149	0.0357157	0.716015
STAT3	Acute lymphocytic leukaemia	rs7304860	chr12	54293705	C	T	0.35547	0.051	0.008515	2.108e-09	0.749683	0.0360721	0.749242
JUN	Acute lymphocytic leukaemia	rs10922098	chr1	196695521	T	C	0.40011	-0.1996	0.008116	1.457e-133	0.561049	-0.00464965	0.961802
JUN	Acute lymphocytic leukaemia	rs11569415	chr19	6716268	A	G	0.24276	-0.066	0.009269	1.074e-12	0.185009	0.117832	0.344104
JUN	Acute lymphocytic leukaemia	rs1707652	chr3	165761011	T	C	0.3102	0.0949	0.008608	2.926e-28	0.248628	0.196937	0.0791043
JUN	Acute lymphocytic leukaemia	rs444921	chr6	31964400	T	C	0.13897	0.1438	0.011493	6.415e-36	0.0767023	0.074568	0.686358
JUN	Acute lymphocytic leukaemia	rs555007	chr6	31882555	C	T	0.07832	0.1177	0.014857	2.331e-15	0.158514	-0.179443	0.177966
SMAD3	Acute lymphocytic leukaemia	rs1354034	chr3	56815721	C	T	0.38119	0.0475	0.008359	1.327e-08	0.704977	-0.125325	0.242803
SMAD3	Acute lymphocytic leukaemia	rs342200	chr7	106676033	A	G	0.42559	-0.0447	0.008197	4.949e-08	0.928885	-0.0350435	0.853556
SMAD3	Acute lymphocytic leukaemia	rs35979828	chr12	54292096	T	C	0.08648	-0.0928	0.014658	2.434e-10	0.0225859	-0.0501213	0.879637
SMAD3	Acute lymphocytic leukaemia	rs4980320	chr11	198986	C	T	0.46986	0.0476	0.008155	5.32e-09	0.479149	0.0357157	0.716015
SMAD2	Acute lymphocytic leukaemia	rs342200	chr7	106676033	A	G	0.42559	-0.0456	0.008215	2.84e-08	0.928885	-0.0350435	0.853556
SMAD2	Acute lymphocytic leukaemia	rs35979828	chr12	54292096	T	C	0.08648	-0.0918	0.014715	4.411e-10	0.0225859	-0.0501213	0.879637
SMAD2	Acute lymphocytic leukaemia	rs4980320	chr11	198986	C	T	0.46986	0.0522	0.008181	1.763e-10	0.479149	0.0357157	0.716015
PDGFRA	Acute lymphocytic leukaemia	rs112171832	chr1	192499332	A	G	0.0155	0.473	0.032907	7.54e-47	0.0012227	0.668369	0.615786
PDGFRA	Acute lymphocytic leukaemia	rs143737500	chr10	4601006	T	C	0.03031	0.1379	0.022832	1.543e-09	0.0173021	-0.46748	0.216943
PDGFRA	Acute lymphocytic leukaemia	rs144408988	chr1	193712371	C	T	0.04947	0.1756	0.019073	3.362e-20	0.0431247	0.357789	0.135296
PDGFRA	Acute lymphocytic leukaemia	rs145336675	chr1	202611965	T	C	0.01744	0.2358	0.031117	3.511e-14	0.0136668	-0.488494	0.257126
PDGFRA	Acute lymphocytic leukaemia	rs150992058	chr1	195950017	C	G	0.01439	0.8696	0.034287	6.539e-142	0.0102625	-0.813333	0.0956996
PDGFRA	Acute lymphocytic leukaemia	rs189772645	chr4	53229158	G	C	0.03317	0.1317	0.022293	3.472e-09	0.0138002	0.0520583	0.903617
PDGFRA	Acute lymphocytic leukaemia	rs2307050	chr4	54275126	A	G	0.07788	-0.1567	0.014754	2.378e-26	0.110511	-0.170616	0.272741
PDGFRA	Acute lymphocytic leukaemia	rs56199187	chr1	161551141	T	C	0.13349	0.0786	0.01198	5.338e-11	0.109712	0.0844632	0.586117
PDGFRA	Acute lymphocytic leukaemia	rs6703327	chr1	186999795	G	T	0.03661	-0.1245	0.021704	9.673e-09	0.980818	-0.496368	0.174324
PDGFRA	Acute lymphocytic leukaemia	rs697357	chr3	165718484	G	A	0.38884	0.0488	0.008097	1.669e-09	0.340413	0.123836	0.2258
PDGFRA	Acute lymphocytic leukaemia	rs72747173	chr1	198033703	T	C	0.21813	0.0555	0.009875	1.904e-08	0.17219	0.0159853	0.901896
PDGFRA	Acute lymphocytic leukaemia	rs79285284	chr4	54796577	C	T	0.01576	0.3144	0.03165	2.97e-23	0.00909094	-0.407739	0.435814
PDGFRA	Acute lymphocytic leukaemia	rs80012936	chr1	194345200	C	A	0.05584	0.2209	0.017928	6.917e-35	0.0217383	-0.010918	0.974161
PDGFRA	Acute lymphocytic leukaemia	rs9658810	chr1	197502940	A	G	0.42562	-0.0639	0.008215	7.369e-15	0.569028	-0.0597927	0.542568
STAT1	Acute lymphocytic leukaemia	rs1354034	chr3	56815721	C	T	0.38119	0.0827	0.008267	1.477e-23	0.704977	-0.125325	0.242803
STAT1	Acute lymphocytic leukaemia	rs181209	chr16	28503533	T	G	0.34145	-0.0535	0.008568	4.256e-10	0.410804	0.0624113	0.526453
STAT1	Acute lymphocytic leukaemia	rs4980320	chr11	198986	C	T	0.46986	0.0511	0.008059	2.283e-10	0.479149	0.0357157	0.716015
STAT1	Acute lymphocytic leukaemia	rs653178	chr12	111569952	T	C	0.38124	-0.0541	0.008286	6.634e-11	0.584748	0.00461181	0.962682
STAT6	Acute lymphocytic leukaemia	rs118188674	chr12	55234226	A	T	0.03902	-0.201	0.02117	2.207e-21	0.0608962	0.00118824	0.995407
STAT6	Acute lymphocytic leukaemia	rs12423621	chr12	59160442	A	G	0.01257	-0.4831	0.036843	2.793e-39	0.00532831	-0.240951	0.701258
STAT6	Acute lymphocytic leukaemia	rs12810354	chr12	60598617	A	G	0.01381	-0.3915	0.035099	6.824e-29	0.00518929	0.50705	0.478033
STAT6	Acute lymphocytic leukaemia	rs1354034	chr3	56815721	C	T	0.38119	0.0723	0.008284	2.608e-18	0.704977	-0.125325	0.242803
STAT6	Acute lymphocytic leukaemia	rs1398617	chr3	165761968	T	G	0.25158	0.0689	0.00926	1.002e-13	0.208388	0.251793	0.0341366
STAT6	Acute lymphocytic leukaemia	rs150937490	chr12	57198815	C	G	0.01733	-0.4012	0.030737	6.126e-39	0.00358348	0.441696	0.575396
STAT6	Acute lymphocytic leukaemia	rs185009887	chr17	5848332	A	G	0.02519	-0.146	0.026124	2.288e-08	0.00967934	0.706444	0.160631
STAT6	Acute lymphocytic leukaemia	rs4980320	chr11	198986	C	T	0.46986	0.0552	0.008079	8.361e-12	0.479149	0.0357157	0.716015
STAT6	Acute lymphocytic leukaemia	rs78062104	chr12	55977889	G	T	0.03941	-0.2146	0.020716	3.794e-25	0.0439586	-0.501931	0.0373018
STAT6	Acute lymphocytic leukaemia	rs78409925	chr12	54421943	C	T	0.0586	-0.0948	0.017374	4.854e-08	0.0240708	0.341834	0.273814
ZNRF3	Acute lymphocytic leukaemia	rs10512472	chr17	35557785	C	T	0.1512	0.0842	0.011188	5.234e-14	0.180084	0.187586	0.136539
ZNRF3	Acute lymphocytic leukaemia	rs114315741	chr3	127279529	C	T	0.01304	0.2294	0.03465	3.581e-11	0.00939648	0.26386	0.601351
ZNRF3	Acute lymphocytic leukaemia	rs1354034	chr3	56815721	C	T	0.38119	0.1451	0.008252	3.35e-69	0.704977	-0.125325	0.242803
ZNRF3	Acute lymphocytic leukaemia	rs1619994	chr3	165744047	G	A	0.2807	0.0781	0.008963	2.956e-18	0.253862	0.203883	0.0647739
ZNRF3	Acute lymphocytic leukaemia	rs4900222	chr14	94166278	A	T	0.19829	-0.0868	0.010104	8.679e-18	0.807786	0.0741894	0.548428
ZNRF3	Acute lymphocytic leukaemia	rs56312618	chr11	237209	A	G	0.24153	0.0772	0.009387	1.972e-16	0.281123	-0.0790504	0.466815
ANGPTL3	Acute lymphocytic leukaemia	rs10889352	chr1	62633352	C	T	0.33773	-0.2189	0.008507	5.121e-146	0.263471	0.142299	0.196564
ANGPTL3	Acute lymphocytic leukaemia	rs113939762	chr1	63583261	G	T	0.04279	-0.158	0.020156	4.549e-15	0.021506	0.00148312	0.996523
ANGPTL3	Acute lymphocytic leukaemia	rs115365379	chr1	63830105	C	T	0.01178	-0.6289	0.03726	6.453e-64	0.00305132	-0.278355	0.745686
ANGPTL3	Acute lymphocytic leukaemia	rs116843064	chr19	8364439	A	G	0.02426	0.1472	0.02579	1.146e-08	0.0272965	0.267499	0.363913
ANGPTL3	Acute lymphocytic leukaemia	rs12130644	chr1	73428961	T	C	0.12561	-0.0711	0.01214	4.726e-09	0.150857	-0.131565	0.333491
ANGPTL3	Acute lymphocytic leukaemia	rs138384996	chr1	64259023	A	G	0.01226	-0.5104	0.036364	9.414e-45	0.0065172	0.960872	0.128956
ANGPTL3	Acute lymphocytic leukaemia	rs138617180	chr1	61058312	G	T	0.01967	-0.3843	0.029336	3.298e-39	0.00159073	-1.0249	0.405447
ANGPTL3	Acute lymphocytic leukaemia	rs144996885	chr1	63494584	G	A	0.01765	-0.2094	0.030016	3.031e-12	0.00891552	-0.455739	0.389537
ANGPTL3	Acute lymphocytic leukaemia	rs17122460	chr1	61594615	T	G	0.08477	-0.0952	0.014526	5.615e-11	0.0572718	0.241045	0.248258
ANGPTL3	Acute lymphocytic leukaemia	rs17123220	chr1	62238014	A	G	0.01048	-0.7903	0.038998	2.612e-91	0.0270742	-0.121324	0.68408
ANGPTL3	Acute lymphocytic leukaemia	rs2119690	chr8	20002028	A	G	0.29756	0.0522	0.008733	2.267e-09	0.256612	-0.0123094	0.91167
ANGPTL3	Acute lymphocytic leukaemia	rs5112	chr19	44927023	G	C	0.48777	0.0529	0.008069	5.535e-11	0.583383	-0.0648352	0.52022
ANGPTL3	Acute lymphocytic leukaemia	rs964184	chr11	116778201	C	G	0.12321	-0.1133	0.012133	9.779e-21	0.855465	0.186323	0.176306
STX12	Acute lymphocytic leukaemia	rs12292693	chr11	65169248	C	A	0.26371	-0.0984	0.008923	2.82e-28	0.239884	-0.0242515	0.832688
STX12	Acute lymphocytic leukaemia	rs1354034	chr3	56815721	C	T	0.38119	0.0481	0.008093	2.797e-09	0.704977	-0.125325	0.242803
STX12	Acute lymphocytic leukaemia	rs185009887	chr17	5848332	A	G	0.02519	-0.1431	0.025509	2.026e-08	0.00967934	0.706444	0.160631
SCARA5	Acute lymphocytic leukaemia	rs112771035	chr11	126355981	G	C	0.05283	-0.1193	0.018139	4.796e-11	0.0822902	0.000625176	0.997161
SCARA5	Acute lymphocytic leukaemia	rs117955789	chr6	81189788	C	A	0.0715	-0.0876	0.016031	4.641e-08	0.0408187	-0.310032	0.212219
SCARA5	Acute lymphocytic leukaemia	rs11872195	chr18	9710890	A	G	0.33238	0.0538	0.008706	6.416e-10	0.332163	-0.119581	0.246766
SCARA5	Acute lymphocytic leukaemia	rs146247846	chr8	29401347	A	T	0.03913	-0.2213	0.022006	8.607e-24	0.0558399	-0.0856805	0.693076
SCARA5	Acute lymphocytic leukaemia	rs2085765	chr8	27863011	G	A	0.13098	-0.1505	0.012411	7.675e-34	0.867461	-0.0127605	0.92904
SCARA5	Acute lymphocytic leukaemia	rs2952556	chr7	121287738	A	G	0.32244	0.0599	0.008777	8.809e-12	0.321136	-0.0468451	0.651415
SCARA5	Acute lymphocytic leukaemia	rs352428	chr8	28621375	G	A	0.11226	-0.0872	0.013221	4.231e-11	0.845738	-0.216161	0.105874
SCARA5	Acute lymphocytic leukaemia	rs594793	chr19	7765060	T	G	0.43083	-0.0603	0.008326	4.4e-13	0.412114	0.104043	0.291804
SCARA5	Acute lymphocytic leukaemia	rs60007820	chr8	27558301	A	G	0.02543	-0.3375	0.026877	3.626e-36	0.00611593	1.30442	0.0359915
SCARA5	Acute lymphocytic leukaemia	rs66913624	chr8	28054208	A	G	0.18853	-0.063	0.010782	5.128e-09	0.168481	0.00115	0.992945
SCARA5	Acute lymphocytic leukaemia	rs780093	chr2	27519736	C	T	0.34157	0.058	0.008689	2.467e-11	0.647653	0.123936	0.223132
SCARA5	Acute lymphocytic leukaemia	rs9344214	chr6	81668532	A	G	0.2363	0.0646	0.00965	2.169e-11	0.300184	-0.00764606	0.942624
NPDC1	Acute lymphocytic leukaemia	rs13208583	chr6	32833094	T	C	0.10406	0.0727	0.013039	2.466e-08	0.0647151	0.101543	0.608918
NPDC1	Acute lymphocytic leukaemia	rs368465	chr1	196702851	C	T	0.39961	-0.063	0.008116	8.315e-15	0.560966	-0.00452725	0.962808
NPDC1	Acute lymphocytic leukaemia	rs9314872	chr9	137059328	C	G	0.10086	0.0898	0.013321	1.573e-11	0.895146	-0.0523347	0.7428
GOSR2	Acute lymphocytic leukaemia	rs10922098	chr1	196695521	T	C	0.40011	-0.1987	0.008026	2.559e-135	0.561049	-0.00464965	0.961802
GOSR2	Acute lymphocytic leukaemia	rs1265941	chr6	31904575	C	A	0.07271	0.1284	0.015183	2.747e-17	0.151525	-0.170495	0.20855
GOSR2	Acute lymphocytic leukaemia	rs1451915	chr1	196058002	A	C	0.13641	0.0625	0.011463	4.969e-08	0.103898	0.0553784	0.73219
GOSR2	Acute lymphocytic leukaemia	rs2686395	chr3	165767231	C	T	0.3101	-0.0976	0.008516	2.089e-30	0.75359	-0.197297	0.0795353
GOSR2	Acute lymphocytic leukaemia	rs550671	chr6	31976816	T	C	0.14045	0.1403	0.011334	3.427e-35	0.0767293	0.074595	0.686148
SLC3A2	Acute lymphocytic leukaemia	rs10922098	chr1	196695521	T	C	0.40011	-0.0968	0.008071	3.871e-33	0.561049	-0.00464965	0.961802
SLC3A2	Acute lymphocytic leukaemia	rs1355538	chr3	165787389	G	A	0.39847	-0.0523	0.008057	8.531e-11	0.672107	-0.150672	0.144439
SLC3A2	Acute lymphocytic leukaemia	rs72637119	chr14	105853387	G	T	0.04345	-0.2524	0.019814	3.615e-37	0.962205	-0.215946	0.425792
AGA	Acute lymphocytic leukaemia	rs116430705	chr4	73370902	A	G	0.0349	0.1385	0.021734	1.858e-10	0.0380115	-0.188645	0.461559
AGA	Acute lymphocytic leukaemia	rs17205128	chr6	32634440	G	C	0.29319	0.0548	0.008687	2.82e-10	0.328714	-0.0335031	0.747503
AGA	Acute lymphocytic leukaemia	rs35617250	chr1	196710552	T	C	0.16537	-0.1237	0.010744	1.13e-30	0.128713	-0.0685492	0.636042
AGA	Acute lymphocytic leukaemia	rs4735839	chr8	1112631	T	C	0.25086	0.0509	0.009261	3.879e-08	0.32921	0.160133	0.122377
AGA	Acute lymphocytic leukaemia	rs6829551	chr4	73307998	C	T	0.19266	-0.1149	0.010123	7.339e-30	0.213536	0.130177	0.270428
CSF2RA	Acute lymphocytic leukaemia	rs3184504	chr12	111446804	C	T	0.37862	-0.0543	0.008647	3.4e-10	0.592237	0.00370426	0.970078
CSF2RA	Acute lymphocytic leukaemia	rs55714927	chr17	7176997	T	C	0.21166	0.0611	0.010298	2.971e-09	0.262341	-0.194079	0.08127
CSF2RA	Acute lymphocytic leukaemia	rs660240	chr1	109275216	C	T	0.205	0.1038	0.010408	1.993e-23	0.786955	0.0827046	0.483178
CSF2RA	Acute lymphocytic leukaemia	rs9469051	chr6	31773713	C	G	0.13645	0.084	0.012131	4.372e-12	0.297711	-0.0766159	0.471922
CSF2RA	Acute lymphocytic leukaemia	rs9469077	chr6	32054075	G	A	0.08952	0.0838	0.014798	1.487e-08	0.0665174	0.13123	0.506184
CLMP	Acute lymphocytic leukaemia	rs56134443	chr11	123281603	T	A	0.42441	0.0552	0.008362	4.066e-11	0.393571	0.0689975	0.4885
CLMP	Acute lymphocytic leukaemia	rs7131073	chr11	123145655	G	A	0.35239	0.0731	0.008629	2.427e-17	0.250124	0.198936	0.0750257
CLMP	Acute lymphocytic leukaemia	rs7206790	chr16	53763996	G	C	0.48577	0.0445	0.008158	4.908e-08	0.484187	0.0109927	0.909647
CLMP	Acute lymphocytic leukaemia	rs77924615	chr16	20381010	A	G	0.19701	-0.066	0.010382	2.055e-10	0.222995	-0.17512	0.131146
CLMP	Acute lymphocytic leukaemia	rs7946718	chr11	123197533	G	A	0.4079	0.2113	0.008322	3.116e-142	0.664939	-0.0280229	0.785682
CLMP	Acute lymphocytic leukaemia	rs9276171	chr6	32731141	G	A	0.22486	0.067	0.009882	1.204e-11	0.199843	-0.087362	0.470316
TMEM190	Acute lymphocytic leukaemia	rs12982674	chr19	55101202	T	C	0.10076	0.2089	0.016091	1.54e-38	0.108653	-0.270565	0.0847169
TMEM190	Acute lymphocytic leukaemia	rs12985351	chr19	54487554	A	G	0.29678	0.0624	0.010824	8.162e-09	0.7298	0.0375903	0.730796
TMEM190	Acute lymphocytic leukaemia	rs150450992	chr19	56316171	A	G	0.0285	-0.1779	0.029593	1.837e-09	0.00791815	0.155883	0.774355
TMEM190	Acute lymphocytic leukaemia	rs45583840	chr19	55390825	A	G	0.0699	-0.5785	0.019067	1e-200	0.0599558	-0.483434	0.0183417
TMEM190	Acute lymphocytic leukaemia	rs62123425	chr19	54888925	A	G	0.19195	0.0986	0.012401	1.846e-15	0.233514	-0.0290121	0.801731
TMEM190	Acute lymphocytic leukaemia	rs7250117	chr19	55554797	A	G	0.38539	-0.2204	0.01	1.213e-107	0.341983	-0.0472981	0.643434
TMEM190	Acute lymphocytic leukaemia	rs73615245	chr19	55712189	A	G	0.0638	0.2483	0.020135	6.112e-35	0.0371899	0.280473	0.272949
TMEM190	Acute lymphocytic leukaemia	rs75602785	chr19	55458294	T	C	0.05618	-0.4717	0.02117	5.594e-110	0.00980494	-0.591187	0.224861
TMEM190	Acute lymphocytic leukaemia	rs77542162	chr17	69085137	G	A	0.025	0.18	0.026241	6.91e-12	0.00669976	0.215206	0.715155
TMEM190	Acute lymphocytic leukaemia	rs79012440	chr19	55337948	A	G	0.29879	-0.3602	0.010504	1e-200	0.365732	0.221515	0.0281067
TMEM190	Acute lymphocytic leukaemia	rs8111781	chr19	55188808	G	A	0.33189	-0.1052	0.010415	5.468e-24	0.326489	-0.0545157	0.599239
APOM	Acute lymphocytic leukaemia	rs12660700	chr6	31475961	A	G	0.01429	-0.1947	0.035513	4.192e-08	0.0187447	0.044303	0.903214
APOM	Acute lymphocytic leukaemia	rs1362076	chr6	29473392	T	G	0.01046	-0.4253	0.04025	4.265e-26	0.00321056	-0.283666	0.743079
APOM	Acute lymphocytic leukaemia	rs139072234	chr6	24713913	C	G	0.01675	-0.2218	0.032655	1.104e-11	0.0179078	0.274837	0.4483
APOM	Acute lymphocytic leukaemia	rs1707652	chr3	165761011	T	C	0.3102	0.0566	0.008837	1.502e-10	0.248628	0.196937	0.0791043
APOM	Acute lymphocytic leukaemia	rs1800961	chr20	44413724	T	C	0.04601	-0.2149	0.019723	1.209e-27	0.0454388	0.150907	0.519935
APOM	Acute lymphocytic leukaemia	rs364950	chr6	33008119	G	A	0.02682	-0.1873	0.025807	3.933e-13	0.00194703	1.16091	0.265878
APOM	Acute lymphocytic leukaemia	rs3782735	chr12	6775910	A	G	0.38274	-0.0483	0.00846	1.135e-08	0.55742	-0.198163	0.0448198
APOM	Acute lymphocytic leukaemia	rs41285751	chr6	31932038	T	G	0.08277	0.1434	0.014948	8.511e-22	0.0244414	0.0813856	0.84429
APOM	Acute lymphocytic leukaemia	rs72786786	chr16	56951602	A	G	0.31073	0.0762	0.008864	8.243e-18	0.303537	-0.0399761	0.705719
APOM	Acute lymphocytic leukaemia	rs780093	chr2	27519736	C	T	0.34157	-0.0578	0.008647	2.313e-11	0.647653	0.123936	0.223132
APOM	Acute lymphocytic leukaemia	rs805295	chr6	31707520	T	C	0.03958	-0.4845	0.02098	5.356e-118	0.00588015	-0.151118	0.818382
PABPC3	Acute lymphocytic leukaemia	rs10761739	chr10	63302248	C	G	0.43566	0.0487	0.008145	2.246e-09	0.384451	-0.129103	0.195095
PABPC3	Acute lymphocytic leukaemia	rs1354034	chr3	56815721	C	T	0.38119	0.1006	0.008305	8.989e-34	0.704977	-0.125325	0.242803
PABPC3	Acute lymphocytic leukaemia	rs4980320	chr11	198986	C	T	0.46986	0.0578	0.008105	9.966e-13	0.479149	0.0357157	0.716015
SHISA2	Acute lymphocytic leukaemia	rs1047286	chr19	6713251	A	G	0.24066	-0.0666	0.009407	1.445e-12	0.174618	0.0768747	0.545999
SHISA2	Acute lymphocytic leukaemia	rs112164276	chr6	32481499	G	A	0.07336	0.0883	0.015487	1.187e-08	0.059677	0.267887	0.199803
SHISA2	Acute lymphocytic leukaemia	rs1265941	chr6	31904575	C	A	0.07271	0.1591	0.015475	8.549e-25	0.151525	-0.170495	0.20855
SHISA2	Acute lymphocytic leukaemia	rs1329424	chr1	196677046	G	T	0.39735	-0.2584	0.008174	1e-200	0.561252	-0.0051467	0.95774
SHISA2	Acute lymphocytic leukaemia	rs2686395	chr3	165767231	C	T	0.3101	-0.1198	0.008675	2.24e-43	0.75359	-0.197297	0.0795353
SHISA2	Acute lymphocytic leukaemia	rs550671	chr6	31976816	T	C	0.14045	0.1843	0.011543	2.171e-57	0.0767293	0.074595	0.686148
SHISA2	Acute lymphocytic leukaemia	rs72748420	chr1	196141224	T	C	0.07417	0.0881	0.015347	9.438e-09	0.103218	-0.0287614	0.856817
NUCB1	Acute lymphocytic leukaemia	rs10169065	chr2	27555693	G	A	0.21645	0.0603	0.009829	8.506e-10	0.279266	-0.0775413	0.474456
NUCB1	Acute lymphocytic leukaemia	rs12462111	chr19	48668049	T	C	0.48639	-0.0458	0.008185	2.2e-08	0.337642	-0.0262735	0.799758
NUCB1	Acute lymphocytic leukaemia	rs3826817	chr19	48898187	T	C	0.26776	-0.145	0.009147	1.356e-56	0.243932	-0.137651	0.223899
NUCB1	Acute lymphocytic leukaemia	rs56199187	chr1	161551141	T	C	0.13349	0.0763	0.012016	2.153e-10	0.109712	0.0844632	0.586117
NUCB1	Acute lymphocytic leukaemia	rs646776	chr1	109275908	T	C	0.20804	0.0837	0.010075	9.741e-17	0.785748	0.0755337	0.520997
NUCB1	Acute lymphocytic leukaemia	rs860532	chr12	103664436	A	C	0.24032	0.0542	0.009549	1.377e-08	0.791596	-0.140747	0.233365
CEACAM20	Acute lymphocytic leukaemia	rs1355538	chr3	165787389	G	A	0.39847	-0.0541	0.00795	1.009e-11	0.672107	-0.150672	0.144439
CEACAM20	Acute lymphocytic leukaemia	rs28853072	chr1	196697958	T	A	0.39738	-0.1323	0.007945	2.966e-62	0.561221	-0.00527677	0.956662
CEACAM20	Acute lymphocytic leukaemia	rs550671	chr6	31976816	T	C	0.14045	0.0984	0.011179	1.344e-18	0.0767293	0.074595	0.686148
IL31	Acute lymphocytic leukaemia	rs223032	chr17	33072123	T	C	0.49932	-0.044	0.007839	1.989e-08	0.491694	0.0934834	0.33529
IL31	Acute lymphocytic leukaemia	rs2289567	chr17	27604611	T	G	0.19919	-0.0734	0.009798	6.8e-14	0.156035	0.156982	0.241236
IL31	Acute lymphocytic leukaemia	rs241771	chr17	28265920	C	T	0.45473	-0.2443	0.007824	1e-200	0.544765	0.0623832	0.522169
IL31	Acute lymphocytic leukaemia	rs77263366	chr17	28669043	C	T	0.02065	0.1979	0.027447	5.583e-13	0.0115286	-0.403456	0.384122
IL31	Acute lymphocytic leukaemia	rs78814626	chr17	29215194	A	G	0.03463	0.145	0.02175	2.618e-11	0.0435058	0.136081	0.566791
ANTXR1	Acute lymphocytic leukaemia	rs10922098	chr1	196695521	T	C	0.40011	-0.0547	0.008562	1.67e-10	0.561049	-0.00464965	0.961802
ANTXR1	Acute lymphocytic leukaemia	rs13234157	chr7	73557398	A	C	0.119	0.0796	0.012926	7.35e-10	0.126837	-0.113739	0.437226
ANTXR1	Acute lymphocytic leukaemia	rs13329672	chr15	58407738	T	C	0.26556	0.0633	0.009478	2.409e-11	0.258576	0.116632	0.29171
ANTXR1	Acute lymphocytic leukaemia	rs17410962	chr8	19990569	A	G	0.09642	0.0927	0.014092	4.762e-11	0.094184	-0.046972	0.777793
ANTXR1	Acute lymphocytic leukaemia	rs2686395	chr3	165767231	C	T	0.3101	-0.098	0.009037	2.125e-27	0.75359	-0.197297	0.0795353
ANTXR1	Acute lymphocytic leukaemia	rs3764261	chr16	56959412	A	C	0.32148	0.1395	0.008936	6.2e-55	0.278194	-0.0381039	0.72482
ANTXR1	Acute lymphocytic leukaemia	rs7424376	chr2	69298791	G	A	0.40051	0.0474	0.008552	2.98e-08	0.621026	-0.0183916	0.854563
TMEM106A	Acute lymphocytic leukaemia	rs10822155	chr10	63311455	A	C	0.43479	0.0635	0.008018	2.372e-15	0.38431	-0.129449	0.193767
TMEM106A	Acute lymphocytic leukaemia	rs10922098	chr1	196695521	T	C	0.40011	-0.0485	0.008135	2.489e-09	0.561049	-0.00464965	0.961802
TMEM106A	Acute lymphocytic leukaemia	rs1293303	chr8	11862718	C	G	0.45245	-0.0556	0.008059	5.233e-12	0.429164	0.201678	0.0409874
TMEM106A	Acute lymphocytic leukaemia	rs2071040	chr3	52830844	G	A	0.22348	-0.1001	0.00952	7.392e-26	0.260943	-0.00668362	0.951655
TMEM106A	Acute lymphocytic leukaemia	rs62258069	chr3	58329536	T	A	0.3398	-0.0518	0.008385	6.512e-10	0.402576	-0.127687	0.196821
TMEM106A	Acute lymphocytic leukaemia	rs7157038	chr14	92735683	C	T	0.29162	0.061	0.008756	3.242e-12	0.318104	-0.0971249	0.354023
TMEM106A	Acute lymphocytic leukaemia	rs72701845	chr14	92750678	A	G	0.02439	-0.2481	0.025728	5.259e-22	0.039388	0.489962	0.0512661
TMEM106A	Acute lymphocytic leukaemia	rs79391435	chr17	43321215	C	T	0.30087	0.0587	0.008722	1.691e-11	0.611713	0.0426358	0.671565
PGRMC2	Acute lymphocytic leukaemia	rs10922098	chr1	196695521	T	C	0.40011	-0.0453	0.008026	1.658e-08	0.561049	-0.00464965	0.961802
PGRMC2	Acute lymphocytic leukaemia	rs1355538	chr3	165787389	G	A	0.39847	-0.052	0.008013	8.603e-11	0.672107	-0.150672	0.144439
PGRMC2	Acute lymphocytic leukaemia	rs7311982	chr12	9162261	C	T	0.30107	0.0922	0.008582	6.357e-27	0.742299	0.217306	0.0501256
ACRV1	Acute lymphocytic leukaemia	rs10922098	chr1	196695521	T	C	0.40011	-0.0898	0.008057	7.565e-29	0.561049	-0.00464965	0.961802
ACRV1	Acute lymphocytic leukaemia	rs11846842	chr14	105875609	T	A	0.34754	-0.0564	0.008504	3.312e-11	0.327438	-0.104377	0.346767
ACRV1	Acute lymphocytic leukaemia	rs13379369	chr14	105863077	G	A	0.15348	-0.1442	0.011189	5.255e-38	0.875089	0.0190168	0.903542
ACRV1	Acute lymphocytic leukaemia	rs1355538	chr3	165787389	G	A	0.39847	-0.0506	0.008054	3.325e-10	0.672107	-0.150672	0.144439
ACRV1	Acute lymphocytic leukaemia	rs139354903	chr14	106031638	A	G	0.02652	0.1447	0.025455	1.311e-08	0.00934253	0.317846	0.551413
ACRV1	Acute lymphocytic leukaemia	rs451652	chr6	32041507	A	G	0.13221	0.0667	0.011894	2.047e-08	0.00509755	-0.102632	0.881778
COL6A3	Acute lymphocytic leukaemia	rs10922098	chr1	196695521	T	C	0.40011	-0.0715	0.007922	1.797e-19	0.561049	-0.00464965	0.961802
COL6A3	Acute lymphocytic leukaemia	rs139126374	chr2	237000173	A	G	0.02237	-0.1696	0.026132	8.58e-11	0.00502672	-1.0299	0.133192
COL6A3	Acute lymphocytic leukaemia	rs2646260	chr2	237369152	G	A	0.31548	-0.1301	0.008372	1.872e-54	0.219416	0.0858432	0.46436
CSF2RB	Acute lymphocytic leukaemia	rs10922098	chr1	196695521	T	C	0.40011	-0.0613	0.008461	4.334e-13	0.561049	-0.00464965	0.961802
CSF2RB	Acute lymphocytic leukaemia	rs113908050	chr22	38291687	C	T	0.03576	0.1512	0.023045	5.342e-11	0.0460741	-0.0671968	0.773749
CSF2RB	Acute lymphocytic leukaemia	rs145143750	chr22	37508521	A	C	0.018	-0.1731	0.031375	3.446e-08	0.0340198	-0.099592	0.711065
CSF2RB	Acute lymphocytic leukaemia	rs2284031	chr22	36925038	C	T	0.40547	-0.3277	0.007129	1e-200	0.581337	-0.0584246	0.554428
CSF2RB	Acute lymphocytic leukaemia	rs2858236	chr22	36971924	C	A	0.38867	-0.0958	0.008724	4.705e-28	0.603122	-0.114201	0.252338
CSF2RB	Acute lymphocytic leukaemia	rs3218340	chr22	37124855	G	C	0.45219	-0.0646	0.008605	6.032e-14	0.540117	-0.173488	0.0768493
CSF2RB	Acute lymphocytic leukaemia	rs77818863	chr22	36916259	G	A	0.03052	0.2203	0.024858	7.834e-19	0.0421187	0.269295	0.26177
CSF2RB	Acute lymphocytic leukaemia	rs78469	chr22	36263142	T	G	0.43385	0.0501	0.008624	6.259e-09	0.485669	0.00119206	0.990279
PTGDS	Acute lymphocytic leukaemia	rs10892301	chr11	118864767	A	G	0.43417	-0.0504	0.008263	1.065e-09	0.449161	-0.0628369	0.519414
PTGDS	Acute lymphocytic leukaemia	rs7040970	chr9	136964561	C	T	0.4943	0.141	0.008163	7.433e-67	0.577565	0.0828139	0.402575
PTGDS	Acute lymphocytic leukaemia	rs72704449	chr1	179504138	C	T	0.04582	0.1066	0.019492	4.526e-08	0.0650663	0.285851	0.148371
PTGDS	Acute lymphocytic leukaemia	rs77924615	chr16	20381010	A	G	0.19701	-0.0805	0.01035	7.382e-15	0.222995	-0.17512	0.131146
MXRA8	Acute lymphocytic leukaemia	rs12353096	chr9	92268862	C	T	0.41825	-0.0526	0.008601	9.622e-10	0.297648	0.0552187	0.603559
MXRA8	Acute lymphocytic leukaemia	rs1260326	chr2	27508073	C	T	0.34132	0.0577	0.008998	1.431e-10	0.650149	0.116298	0.253911
MXRA8	Acute lymphocytic leukaemia	rs13329672	chr15	58407738	T	C	0.26556	0.0868	0.0096	1.545e-19	0.258576	0.116632	0.29171
MXRA8	Acute lymphocytic leukaemia	rs174536	chr11	61784455	C	A	0.39086	-0.0486	0.008676	2.12e-08	0.414816	-0.0996477	0.311868
MXRA8	Acute lymphocytic leukaemia	rs1800588	chr15	58431476	T	C	0.19095	0.0966	0.010761	2.779e-19	0.248653	0.0891324	0.425749
MXRA8	Acute lymphocytic leukaemia	rs2477642	chr10	17821038	C	T	0.43852	0.0783	0.008584	7.387e-20	0.523399	0.0176869	0.856341
MXRA8	Acute lymphocytic leukaemia	rs2542941	chr2	171553211	T	C	0.30705	-0.0679	0.009214	1.716e-13	0.635836	0.0825987	0.415807
MXRA8	Acute lymphocytic leukaemia	rs3764261	chr16	56959412	A	C	0.32148	0.0908	0.00907	1.367e-23	0.278194	-0.0381039	0.72482
MXRA8	Acute lymphocytic leukaemia	rs5104	chr11	116821618	T	C	0.14054	-0.1004	0.012184	1.714e-16	0.776292	0.0393224	0.737186
MXRA8	Acute lymphocytic leukaemia	rs6805055	chr3	99711516	A	T	0.18109	-0.0603	0.011013	4.362e-08	0.116007	-0.211412	0.165065
MXRA8	Acute lymphocytic leukaemia	rs78705678	chr10	17794281	G	A	0.36741	0.0764	0.008843	5.625e-18	0.384131	0.0325167	0.745717
DHX9	Acute lymphocytic leukaemia	rs10922098	chr1	196695521	T	C	0.40011	-0.1735	0.008125	3.666e-101	0.561049	-0.00464965	0.961802
DHX9	Acute lymphocytic leukaemia	rs11569415	chr19	6716268	A	G	0.24276	-0.0586	0.009267	2.559e-10	0.185009	0.117832	0.344104
DHX9	Acute lymphocytic leukaemia	rs1707652	chr3	165761011	T	C	0.3102	0.1031	0.008603	4.322e-33	0.248628	0.196937	0.0791043
DHX9	Acute lymphocytic leukaemia	rs550671	chr6	31976816	T	C	0.14045	0.1483	0.011456	2.51e-38	0.0767293	0.074595	0.686148
DHX9	Acute lymphocytic leukaemia	rs9469195	chr6	32617235	G	C	0.37544	0.0665	0.008212	5.605e-16	0.37734	-0.104164	0.300841
PSMB6	Acute lymphocytic leukaemia	rs10922098	chr1	196695521	T	C	0.40011	-0.105	0.00806	8.558e-39	0.561049	-0.00464965	0.961802
PSMB6	Acute lymphocytic leukaemia	rs1355538	chr3	165787389	G	A	0.39847	-0.0449	0.008068	2.622e-08	0.672107	-0.150672	0.144439
PSMB6	Acute lymphocytic leukaemia	rs5754116	chr22	32497933	T	C	0.30857	-0.0541	0.008587	2.967e-10	0.345212	-0.0919367	0.369755
CD99L2	Acute lymphocytic leukaemia	rs10922098	chr1	196695521	T	C	0.40011	-0.1412	0.008081	2.296e-68	0.561049	-0.00464965	0.961802
CD99L2	Acute lymphocytic leukaemia	rs1355538	chr3	165787389	G	A	0.39847	-0.0605	0.008091	7.572e-14	0.672107	-0.150672	0.144439
CD99L2	Acute lymphocytic leukaemia	rs704	chr17	28367840	A	G	0.49189	0.0642	0.007937	6.019e-16	0.419906	-0.192181	0.050501
CD99L2	Acute lymphocytic leukaemia	rs7774739	chr6	32041524	G	A	0.17585	0.0903	0.011062	3.272e-16	0.00283685	-0.0834957	0.932347
TSPEAR	Acute lymphocytic leukaemia	rs10922098	chr1	196695521	T	C	0.40011	-0.1931	0.008034	1.202e-127	0.561049	-0.00464965	0.961802
TSPEAR	Acute lymphocytic leukaemia	rs1451915	chr1	196058002	A	C	0.13641	0.0661	0.011467	8.205e-09	0.103898	0.0553784	0.73219
TSPEAR	Acute lymphocytic leukaemia	rs2686395	chr3	165767231	C	T	0.3101	-0.0876	0.008523	8.849e-25	0.75359	-0.197297	0.0795353
TSPEAR	Acute lymphocytic leukaemia	rs389512	chr6	31979817	C	G	0.14145	0.1335	0.011318	4.111e-32	0.0742942	0.0752527	0.687695
BMPR1B	Acute lymphocytic leukaemia	rs10922098	chr1	196695521	T	C	0.40011	-0.1715	0.008179	1.257e-97	0.561049	-0.00464965	0.961802
BMPR1B	Acute lymphocytic leukaemia	rs1707652	chr3	165761011	T	C	0.3102	0.085	0.00867	1.083e-22	0.248628	0.196937	0.0791043
BMPR1B	Acute lymphocytic leukaemia	rs550671	chr6	31976816	T	C	0.14045	0.1333	0.011538	7.131e-31	0.0767293	0.074595	0.686148
BMPR1B	Acute lymphocytic leukaemia	rs555007	chr6	31882555	C	T	0.07832	0.1058	0.01497	1.579e-12	0.158514	-0.179443	0.177966
LAT	Acute lymphocytic leukaemia	rs12586321	chr14	105952978	G	A	0.49135	0.0632	0.007934	1.638e-15	0.483646	-0.101458	0.31852
LAT	Acute lymphocytic leukaemia	rs2093214	chr14	105877986	G	A	0.48262	0.0449	0.007932	1.511e-08	0.472802	0.0733416	0.477932
LAT	Acute lymphocytic leukaemia	rs761972	chr14	105733519	G	C	0.0781	0.0876	0.014483	1.461e-09	0.928125	0.00101205	0.995833
LAT	Acute lymphocytic leukaemia	rs9273429	chr6	32659679	A	G	0.4381	0.0677	0.007804	4.123e-18	0.641724	0.0531771	0.597996
KLRC4	Acute lymphocytic leukaemia	rs1707652	chr3	165761011	T	C	0.3102	0.0618	0.008678	1.067e-12	0.248628	0.196937	0.0791043
KLRC4	Acute lymphocytic leukaemia	rs572515	chr1	196677131	G	A	0.3973	-0.064	0.008226	7.254e-15	0.561231	-0.00508186	0.95827
KLRC4	Acute lymphocytic leukaemia	rs6993770	chr8	105569300	T	A	0.22448	-0.0798	0.009665	1.504e-16	0.223119	0.0374289	0.74915
TEX29	Acute lymphocytic leukaemia	rs12529130	chr6	31788532	A	C	0.11295	0.0696	0.01248	2.451e-08	0.17188	0.0620479	0.629306
TEX29	Acute lymphocytic leukaemia	rs2922965	chr7	96822559	G	T	0.03498	-0.1423	0.021736	5.883e-11	0.986158	0.49889	0.234716
TEX29	Acute lymphocytic leukaemia	rs41452950	chr1	56954954	G	A	0.05176	0.2613	0.018314	3.457e-46	0.0370175	-0.145595	0.566882
TEX29	Acute lymphocytic leukaemia	rs6458	chr6	32039847	G	A	0.12614	0.0939	0.01205	6.573e-15	0.0776627	0.165876	0.366967
TEX29	Acute lymphocytic leukaemia	rs72760268	chr9	121196169	T	C	0.01017	0.249	0.041206	1.515e-09	0.00347919	0.254543	0.753779
TEX29	Acute lymphocytic leukaemia	rs76342676	chr7	94660581	T	C	0.02104	0.2071	0.028635	4.749e-13	0.00571254	0.296388	0.654469
TEX29	Acute lymphocytic leukaemia	rs854547	chr7	95294544	A	G	0.40137	-0.261	0.008132	1e-200	0.607943	0.242426	0.0148539
TEX29	Acute lymphocytic leukaemia	rs9801685	chr7	93168318	A	G	0.09063	0.0772	0.014072	4.111e-08	0.0852451	0.0587613	0.732784
PCDH9	Acute lymphocytic leukaemia	rs10984499	chr9	97953107	A	G	0.35268	-0.0636	0.008754	3.725e-13	0.399049	0.014366	0.884462
PCDH9	Acute lymphocytic leukaemia	rs11720167	chr3	165768357	G	T	0.19032	0.0587	0.01069	3.991e-08	0.17406	0.236308	0.062939
PCDH9	Acute lymphocytic leukaemia	rs147278277	chr13	68631674	T	A	0.02988	0.1451	0.024699	4.238e-09	0.01693	-0.333842	0.377245
PCDH9	Acute lymphocytic leukaemia	rs192652452	chr13	66130832	G	A	0.01404	0.3516	0.035408	3.087e-23	0.00696953	-0.654852	0.274955
PCDH9	Acute lymphocytic leukaemia	rs2786946	chr13	100693788	C	G	0.33297	0.1266	0.009058	2.172e-44	0.409745	0.205984	0.0371835
PCDH9	Acute lymphocytic leukaemia	rs3887925	chr3	186947857	T	C	0.49542	0.0585	0.008451	4.451e-12	0.463863	0.0497116	0.609541
PCDH9	Acute lymphocytic leukaemia	rs4396423	chr13	66715735	T	C	0.35099	0.0977	0.008847	2.371e-28	0.410933	-0.14924	0.130801
PCDH9	Acute lymphocytic leukaemia	rs55714927	chr17	7176997	T	C	0.21166	0.0778	0.010351	5.642e-14	0.262341	-0.194079	0.08127
PCDH9	Acute lymphocytic leukaemia	rs55823018	chr16	88468834	T	C	0.29597	0.0559	0.009272	1.651e-09	0.29351	-0.0739705	0.488418
PCDH9	Acute lymphocytic leukaemia	rs5804316	chr13	67220270	AT	A	0.1144	-0.2933	0.013358	7.505e-107	0.854473	0.00682307	0.960286
PCDH9	Acute lymphocytic leukaemia	rs700589	chr5	88812636	A	T	0.32648	0.0538	0.008973	2.026e-09	0.324002	0.156839	0.130174
PCDH9	Acute lymphocytic leukaemia	rs7087507	chr10	61985930	G	A	0.28935	0.0613	0.009207	2.777e-11	0.271364	0.269364	0.00716968
PCDH9	Acute lymphocytic leukaemia	rs7310615	chr12	111427245	G	C	0.37607	-0.0537	0.008683	6.222e-10	0.586289	0.0080154	0.935264
PCDH9	Acute lymphocytic leukaemia	rs736289	chr19	33266156	C	T	0.3465	0.0538	0.008807	1.005e-09	0.417033	0.0700405	0.476935
PCDH9	Acute lymphocytic leukaemia	rs77341267	chr5	158968629	C	T	0.0583	-0.0974	0.017835	4.73e-08	0.0573611	-0.0352416	0.865863
PCDH9	Acute lymphocytic leukaemia	rs7840212	chr8	129587001	T	C	0.32442	-0.0674	0.008949	5.011e-14	0.294195	-0.0607843	0.571033
PCDH9	Acute lymphocytic leukaemia	rs950941	chr13	70958033	T	A	0.32442	-0.0562	0.009098	6.537e-10	0.233125	-0.000798846	0.994493
PCDH9	Acute lymphocytic leukaemia	rs9571710	chr13	67065009	T	G	0.26606	0.196	0.009574	3.893e-93	0.314354	-0.161611	0.121184
PCDH9	Acute lymphocytic leukaemia	rs9738226	chr12	120985856	G	A	0.35359	0.0765	0.008783	3.048e-18	0.58214	-0.170893	0.0849122
ITM2C	Acute lymphocytic leukaemia	rs10922098	chr1	196695521	T	C	0.40011	-0.0786	0.007979	6.793e-23	0.561049	-0.00464965	0.961802
ITM2C	Acute lymphocytic leukaemia	rs148919153	chr9	122605589	G	A	0.01389	0.2283	0.034183	2.41e-11	0.0128266	0.913186	0.0371492
ITM2C	Acute lymphocytic leukaemia	rs893522	chr3	165842830	C	A	0.05998	0.0966	0.016868	1.023e-08	0.0813782	0.419918	0.017338
PGLYRP3	Acute lymphocytic leukaemia	rs1047286	chr19	6713251	A	G	0.24066	-0.0535	0.009317	9.355e-09	0.174618	0.0768747	0.545999
PGLYRP3	Acute lymphocytic leukaemia	rs10922098	chr1	196695521	T	C	0.40011	-0.1593	0.008121	1.126e-85	0.561049	-0.00464965	0.961802
PGLYRP3	Acute lymphocytic leukaemia	rs12478841	chr2	27588855	G	A	0.21569	0.0562	0.009611	4.985e-09	0.279299	-0.0775535	0.474464
PGLYRP3	Acute lymphocytic leukaemia	rs141738509	chr1	153340595	C	A	0.02076	-0.1795	0.027834	1.126e-10	0.0363053	0.460806	0.0796691
PGLYRP3	Acute lymphocytic leukaemia	rs2075798	chr6	31878964	A	C	0.0783	0.1073	0.014862	5.203e-13	0.158127	-0.176805	0.184641
PGLYRP3	Acute lymphocytic leukaemia	rs550671	chr6	31976816	T	C	0.14045	0.1251	0.011454	9.083e-28	0.0767293	0.074595	0.686148
SLITRK3	Acute lymphocytic leukaemia	rs10761727	chr10	63235733	T	C	0.47803	-0.0569	0.008181	3.523e-12	0.483621	-0.238791	0.0138813
SLITRK3	Acute lymphocytic leukaemia	rs114464925	chr3	166349458	T	G	0.03638	0.1608	0.022172	4.095e-13	0.0622499	-0.0691269	0.730301
SLITRK3	Acute lymphocytic leukaemia	rs1154988	chr3	136206349	A	T	0.22728	-0.0977	0.009922	7.049e-23	0.852048	0.101971	0.457222
SLITRK3	Acute lymphocytic leukaemia	rs12601665	chr17	49244902	G	C	0.47345	0.0685	0.0082	6.635e-17	0.430073	-0.177488	0.0711443
SLITRK3	Acute lymphocytic leukaemia	rs148190310	chr7	148867046	A	G	0.03692	0.1273	0.022086	8.221e-09	0.0156208	0.357535	0.35957
SLITRK3	Acute lymphocytic leukaemia	rs1519125	chr11	16223042	C	G	0.40827	0.0459	0.008282	2.985e-08	0.332105	-0.218212	0.0337987
SLITRK3	Acute lymphocytic leukaemia	rs186735625	chr7	28180337	T	C	0.07645	0.1064	0.015477	6.209e-12	0.101513	0.278997	0.080423
SLITRK3	Acute lymphocytic leukaemia	rs2036291	chr3	152349004	G	A	0.44401	0.0456	0.008326	4.328e-08	0.349147	-0.00442702	0.965389
SLITRK3	Acute lymphocytic leukaemia	rs2111557	chr3	169607833	T	C	0.48945	0.0525	0.008297	2.491e-10	0.512196	-0.0784181	0.420439
SLITRK3	Acute lymphocytic leukaemia	rs2259820	chr12	120997539	T	C	0.2883	-0.0645	0.009002	7.765e-13	0.301143	0.212469	0.0452397
SLITRK3	Acute lymphocytic leukaemia	rs273492	chr19	18127072	A	G	0.24761	-0.0547	0.009491	8.246e-09	0.260837	0.0791656	0.477462
SLITRK3	Acute lymphocytic leukaemia	rs2976842	chr8	8432389	A	T	0.44317	-0.0443	0.0081	4.52e-08	0.508438	-0.0302197	0.757694
SLITRK3	Acute lymphocytic leukaemia	rs36170987	chr7	259884	T	G	0.46293	-0.0686	0.008187	5.327e-17	0.524549	0.190003	0.051619
SLITRK3	Acute lymphocytic leukaemia	rs41278228	chr20	63963478	A	G	0.20241	0.0838	0.010276	3.493e-16	0.149066	0.0554565	0.686257
SLITRK3	Acute lymphocytic leukaemia	rs56292801	chr16	88468933	A	G	0.25442	0.0682	0.009478	6.234e-13	0.240988	-0.016061	0.88732
SLITRK3	Acute lymphocytic leukaemia	rs57526361	chr16	30635175	A	G	0.36365	-0.0501	0.00848	3.466e-09	0.351181	-0.0603609	0.556261
SLITRK3	Acute lymphocytic leukaemia	rs722740	chr8	115949755	T	C	0.39677	-0.0486	0.008345	5.747e-09	0.525043	-0.0399655	0.680876
SLITRK3	Acute lymphocytic leukaemia	rs74397112	chr12	132517525	T	C	0.16588	0.0621	0.011039	1.849e-08	0.126611	-0.0126193	0.931553
SLITRK3	Acute lymphocytic leukaemia	rs75357795	chr3	167761101	G	C	0.02031	-0.1828	0.02952	5.922e-10	0.0577179	0.114865	0.588251
SLITRK3	Acute lymphocytic leukaemia	rs7540799	chr1	151825217	T	C	0.15738	0.0631	0.011187	1.694e-08	0.176624	0.0715471	0.579206
SLITRK3	Acute lymphocytic leukaemia	rs7740107	chr6	130053316	A	T	0.26238	-0.0546	0.009309	4.485e-09	0.734728	-0.176741	0.110258
SLITRK3	Acute lymphocytic leukaemia	rs79598313	chr1	26958422	T	C	0.0134	0.2346	0.034729	1.426e-11	0.0349222	0.17945	0.490475
SLITRK3	Acute lymphocytic leukaemia	rs80336735	chr3	164927647	C	A	0.09881	-0.1232	0.013889	7.278e-19	0.134422	-0.159736	0.266431
SLITRK3	Acute lymphocytic leukaemia	rs9462852	chr6	42939589	T	C	0.05885	-0.1313	0.017678	1.109e-13	0.0514535	-0.127474	0.567862
SCGB1A1	Acute lymphocytic leukaemia	rs1126605	chr12	7089608	T	C	0.09116	0.2266	0.013924	1.498e-59	0.0784779	-0.0647839	0.71793
SCGB1A1	Acute lymphocytic leukaemia	rs12217103	chr1	16949400	T	A	0.27414	-0.2814	0.009091	1e-200	0.363491	0.0327219	0.747412
SCGB1A1	Acute lymphocytic leukaemia	rs1355538	chr3	165787389	G	A	0.39847	-0.0786	0.008312	3.208e-21	0.672107	-0.150672	0.144439
SCGB1A1	Acute lymphocytic leukaemia	rs143819005	chr7	151220805	C	T	0.15473	0.067	0.011253	2.614e-09	0.142964	0.0931692	0.500634
SCGB1A1	Acute lymphocytic leukaemia	rs187347153	chr1	16388188	C	A	0.02573	-0.1415	0.025619	3.329e-08	0.0370127	-0.266626	0.303164
SCGB1A1	Acute lymphocytic leukaemia	rs203688	chr1	196703255	A	G	0.39961	-0.0482	0.008396	9.437e-09	0.560935	-0.00448104	0.963193
SCGB1A1	Acute lymphocytic leukaemia	rs35496797	chr1	17010050	C	G	0.15338	-0.1046	0.011393	4.279e-20	0.157466	0.082239	0.540854
SCGB1A1	Acute lymphocytic leukaemia	rs61767275	chr1	17066032	G	C	0.02639	0.185	0.025075	1.609e-13	0.0100638	-0.317532	0.530861
SCGB1A1	Acute lymphocytic leukaemia	rs7614709	chr3	186675997	A	G	0.23639	0.094	0.009552	7.497e-23	0.279125	-0.189544	0.0800627
MGAT1	Acute lymphocytic leukaemia	rs10922098	chr1	196695521	T	C	0.40011	-0.0667	0.00801	8.314e-17	0.561049	-0.00464965	0.961802
MGAT1	Acute lymphocytic leukaemia	rs28873836	chr19	51811402	C	G	0.27564	-0.0545	0.00877	5.145e-10	0.200671	0.147113	0.225429
MGAT1	Acute lymphocytic leukaemia	rs41285751	chr6	31932038	T	G	0.08277	0.0854	0.014291	2.287e-09	0.0244414	0.0813856	0.84429
MGAT1	Acute lymphocytic leukaemia	rs634501	chr5	180791668	G	A	0.25799	0.0628	0.008987	2.797e-12	0.784556	-0.081504	0.508241
CST8	Acute lymphocytic leukaemia	rs112930619	chr17	35961002	C	A	0.02581	-0.7924	0.026145	1e-200	0.0249721	0.296407	0.356373
CST8	Acute lymphocytic leukaemia	rs11535840	chr11	71515717	A	G	0.03917	0.1529	0.021307	7.17e-13	0.0405068	-0.215124	0.380818
CST8	Acute lymphocytic leukaemia	rs117517474	chr17	35556493	C	T	0.01071	-0.2423	0.040959	3.304e-09	0.0110246	0.216673	0.644229
CST8	Acute lymphocytic leukaemia	rs139210698	chr17	38301114	A	C	0.02285	-0.2302	0.028736	1.138e-15	0.00887554	0.0847529	0.872247
CST8	Acute lymphocytic leukaemia	rs150951362	chr17	35977228	A	G	0.03577	-0.7549	0.021873	1e-200	0.0316898	-0.337306	0.232433
CST8	Acute lymphocytic leukaemia	rs1707652	chr3	165761011	T	C	0.3102	0.065	0.009007	5.333e-13	0.248628	0.196937	0.0791043
CST8	Acute lymphocytic leukaemia	rs3748338	chr14	20699417	T	A	0.15453	0.0874	0.011615	5.292e-14	0.126598	-0.169003	0.256189
CST8	Acute lymphocytic leukaemia	rs41285751	chr6	31932038	T	G	0.08277	0.2231	0.01519	7.805e-49	0.0244414	0.0813856	0.84429
CST8	Acute lymphocytic leukaemia	rs41324748	chr17	35498384	G	A	0.01015	-0.5803	0.042042	2.45e-43	0.00959053	-1.0238	0.0400276
CST8	Acute lymphocytic leukaemia	rs4251784	chr17	35844448	A	G	0.04233	-0.2631	0.02071	5.624e-37	0.0279228	-0.115084	0.706399
CST8	Acute lymphocytic leukaemia	rs451652	chr6	32041507	A	G	0.13221	0.1731	0.01258	4.411e-43	0.00509755	-0.102632	0.881778
AXL	Acute lymphocytic leukaemia	rs11080372	chr17	36075679	G	A	0.43422	-0.1001	0.008342	3.579e-33	0.466586	-0.0191677	0.844353
AXL	Acute lymphocytic leukaemia	rs113341849	chr3	46342713	A	G	0.11937	0.3179	0.01234	2.348e-146	0.127777	-0.00514842	0.971722
AXL	Acute lymphocytic leukaemia	rs141462616	chr17	35834855	A	C	0.01152	0.2184	0.038715	1.688e-08	0.0189935	0.597932	0.109281
AXL	Acute lymphocytic leukaemia	rs143728110	chr17	34559913	T	G	0.01399	-0.3483	0.035694	1.706e-22	0.00759448	0.376915	0.47712
AXL	Acute lymphocytic leukaemia	rs61080193	chr3	45387850	G	A	0.04859	0.1088	0.019067	1.155e-08	0.0387733	-0.104657	0.678961
AXL	Acute lymphocytic leukaemia	rs75240299	chr17	37399772	A	G	0.17783	-0.0657	0.010777	1.086e-09	0.861991	0.0565401	0.690097
AXL	Acute lymphocytic leukaemia	rs9330240	chr17	36618251	T	C	0.0631	-0.4399	0.017077	2.545e-146	0.0429134	-0.163775	0.488682
PUF60	Acute lymphocytic leukaemia	rs28873836	chr19	51811402	C	G	0.27564	-0.1014	0.008848	2.084e-30	0.200671	0.147113	0.225429
PUF60	Acute lymphocytic leukaemia	rs3129754	chr6	32615269	G	A	0.4942	0.0456	0.007903	7.922e-09	0.558404	-0.0105998	0.913908
PUF60	Acute lymphocytic leukaemia	rs4795734	chr17	33030407	A	G	0.23628	-0.0517	0.009316	2.865e-08	0.739636	0.041157	0.709571
PUF60	Acute lymphocytic leukaemia	rs4801902	chr19	51936045	T	C	0.0647	0.098	0.016013	9.353e-10	0.0259213	0.446609	0.142645
SFTA2	Acute lymphocytic leukaemia	rs10922098	chr1	196695521	T	C	0.40011	-0.1257	0.008031	3.217e-55	0.561049	-0.00464965	0.961802
SFTA2	Acute lymphocytic leukaemia	rs3863087	chr3	165792099	A	G	0.09559	-0.0867	0.013611	1.894e-10	0.910319	-0.364013	0.0122752
SFTA2	Acute lymphocytic leukaemia	rs6445035	chr3	165762312	A	G	0.1904	0.1032	0.010007	6.184e-25	0.176283	0.234745	0.0632135
SFTA2	Acute lymphocytic leukaemia	rs7774739	chr6	32041524	G	A	0.17585	0.0937	0.010989	1.509e-17	0.00283685	-0.0834957	0.932347
POMK	Acute lymphocytic leukaemia	rs1047286	chr19	6713251	A	G	0.24066	-0.053	0.009273	1.093e-08	0.174618	0.0768747	0.545999
POMK	Acute lymphocytic leukaemia	rs10922098	chr1	196695521	T	C	0.40011	-0.1699	0.008066	1.745e-98	0.561049	-0.00464965	0.961802
POMK	Acute lymphocytic leukaemia	rs141575023	chr14	105904512	T	C	0.12748	0.0715	0.012099	3.425e-09	0.206662	0.0440101	0.722883
POMK	Acute lymphocytic leukaemia	rs2686395	chr3	165767231	C	T	0.3101	-0.0861	0.008551	7.534e-24	0.75359	-0.197297	0.0795353
POMK	Acute lymphocytic leukaemia	rs550671	chr6	31976816	T	C	0.14045	0.1349	0.011381	2.068e-32	0.0767293	0.074595	0.686148
POMK	Acute lymphocytic leukaemia	rs555007	chr6	31882555	C	T	0.07832	0.1076	0.014771	3.226e-13	0.158514	-0.179443	0.177966
NDUFS4	Acute lymphocytic leukaemia	rs112454880	chr1	196720826	C	T	0.01064	-0.6579	0.035817	2.345e-75	0.0433473	-0.0108612	0.963424
NDUFS4	Acute lymphocytic leukaemia	rs114990940	chr1	196505596	A	G	0.01142	-0.6046	0.035152	2.681e-66	0.00443794	-1.01296	0.178168
NDUFS4	Acute lymphocytic leukaemia	rs11588705	chr1	196117980	T	C	0.03027	-0.6217	0.020448	1e-200	0.0196347	-0.267658	0.450699
NDUFS4	Acute lymphocytic leukaemia	rs116119767	chr1	196246962	T	C	0.01363	0.4131	0.030374	3.976e-42	0.00462078	-1.02296	0.169695
NDUFS4	Acute lymphocytic leukaemia	rs12035228	chr1	196110779	A	G	0.25269	-0.0912	0.00813	3.319e-29	0.325038	-0.170704	0.100659
NDUFS4	Acute lymphocytic leukaemia	rs1250258	chr2	215435462	T	C	0.32665	0.1157	0.006507	9.944e-71	0.790075	0.00519693	0.96521
NDUFS4	Acute lymphocytic leukaemia	rs139784897	chr1	196612631	A	G	0.02272	-0.5725	0.023355	1.086e-132	0.0141292	-0.376079	0.352256
NDUFS4	Acute lymphocytic leukaemia	rs142565493	chr1	196870713	T	C	0.01549	0.5202	0.028552	3.632e-74	0.00942201	0.0781007	0.881095
NDUFS4	Acute lymphocytic leukaemia	rs144743753	chr2	25301539	A	G	0.02307	0.11	0.020126	4.616e-08	0.00252409	-0.117673	0.901396
NDUFS4	Acute lymphocytic leukaemia	rs147814709	chr1	196868047	C	T	0.01676	-0.5918	0.027056	4.651e-106	0.0265391	0.51242	0.100783
NDUFS4	Acute lymphocytic leukaemia	rs148056042	chr1	196865091	A	G	0.05135	0.3795	0.015802	1.874e-127	0.0338304	0.104042	0.709646
NDUFS4	Acute lymphocytic leukaemia	rs148789508	chr1	196146044	A	G	0.01251	-0.3731	0.031221	6.461e-33	0.024609	-0.0476153	0.88335
NDUFS4	Acute lymphocytic leukaemia	rs149681097	chr1	197595865	A	C	0.02789	-0.2321	0.021577	5.507e-27	0.00998725	-0.182342	0.698694
NDUFS4	Acute lymphocytic leukaemia	rs151334895	chr1	196238740	C	T	0.0428	-0.5948	0.017314	1e-200	0.0406891	0.0303538	0.901049
NDUFS4	Acute lymphocytic leukaemia	rs187739503	chr1	196855556	T	A	0.02509	-0.6014	0.02224	4.755e-161	0.0276022	-0.203034	0.486089
NDUFS4	Acute lymphocytic leukaemia	rs191076788	chr1	196946276	T	G	0.01687	0.5318	0.027517	3.24e-83	0.0226766	0.197167	0.540067
NDUFS4	Acute lymphocytic leukaemia	rs35788722	chr1	196706669	C	A	0.02566	-0.6192	0.021919	1.456e-175	0.0278955	0.0376124	0.90095
NDUFS4	Acute lymphocytic leukaemia	rs6660584	chr1	182761873	G	A	0.48128	-0.0506	0.007042	6.7e-13	0.53179	0.0378224	0.698437
NDUFS4	Acute lymphocytic leukaemia	rs6664577	chr1	185482968	A	G	0.15439	-0.0934	0.009794	1.482e-21	0.146499	0.302545	0.0137635
NDUFS4	Acute lymphocytic leukaemia	rs7535761	chr1	180559062	A	C	0.49181	-0.0476	0.007067	1.629e-11	0.53448	-0.087987	0.369039
NDUFS4	Acute lymphocytic leukaemia	rs77333802	chr1	190633964	T	C	0.0302	0.1437	0.020959	7.066e-12	0.0082631	1.0626	0.00306098
NDUFS4	Acute lymphocytic leukaemia	rs79707161	chr1	196391832	G	A	0.03594	0.3436	0.018912	9.229e-74	0.0229703	0.195246	0.540617
CLGN	Acute lymphocytic leukaemia	rs118170342	chr19	44898611	C	T	0.04525	-0.11	0.019731	2.476e-08	0.0416669	-0.0598034	0.805334
CLGN	Acute lymphocytic leukaemia	rs138772443	chr9	136451014	A	G	0.02385	0.1482	0.026851	3.403e-08	0.0135502	-0.429357	0.318848
CLGN	Acute lymphocytic leukaemia	rs139128791	chr1	196965155	T	C	0.02649	-0.1496	0.026054	9.361e-09	0.00680861	-0.313053	0.603712
CLGN	Acute lymphocytic leukaemia	rs144558125	chr1	55238061	T	C	0.04144	0.1358	0.020906	8.265e-11	0.0291776	0.24552	0.402448
CLGN	Acute lymphocytic leukaemia	rs155298	chr1	57190828	T	C	0.34977	-0.0523	0.00877	2.468e-09	0.304794	-0.0286734	0.785673
CLGN	Acute lymphocytic leukaemia	rs1707652	chr3	165761011	T	C	0.3102	0.049	0.008818	2.752e-08	0.248628	0.196937	0.0791043
CLGN	Acute lymphocytic leukaemia	rs2270000	chr1	54785839	T	C	0.13474	0.0822	0.012271	2.101e-11	0.158268	-0.0628311	0.639701
CLGN	Acute lymphocytic leukaemia	rs41286846	chr1	56943654	C	T	0.08278	-0.2276	0.015185	8.697e-51	0.0439387	0.0836125	0.720125
CLGN	Acute lymphocytic leukaemia	rs4912425	chr1	57057812	G	A	0.20892	0.1614	0.010353	8.585e-55	0.794099	0.0715444	0.558944
CLGN	Acute lymphocytic leukaemia	rs6696924	chr1	56894255	G	T	0.24921	0.3517	0.009453	1e-200	0.267878	0.0479114	0.662686
CLGN	Acute lymphocytic leukaemia	rs79906664	chr1	56682948	A	G	0.10836	0.1381	0.013518	1.679e-24	0.0936831	0.0381511	0.817958
CLGN	Acute lymphocytic leukaemia	rs908830	chr9	136946407	C	T	0.05088	-0.3348	0.018503	3.522e-73	0.942387	-0.402648	0.0500322
HTN3	Acute lymphocytic leukaemia	rs10832961	chr11	18632410	G	C	0.28717	-0.0675	0.009026	7.516e-14	0.626686	0.0338756	0.736094
HTN3	Acute lymphocytic leukaemia	rs10863962	chr1	206955921	T	C	0.25986	0.0738	0.009323	2.451e-15	0.191587	-0.0523302	0.671744
HTN3	Acute lymphocytic leukaemia	rs115000417	chr4	70014802	T	C	0.0322	-0.442	0.02342	1.912e-79	0.0167872	0.216734	0.561513
HTN3	Acute lymphocytic leukaemia	rs12517853	chr5	96785443	A	G	0.08551	-0.0913	0.014597	3.984e-10	0.0440997	-0.095064	0.689595
HTN3	Acute lymphocytic leukaemia	rs13357659	chr5	44432783	G	A	0.39638	-0.0877	0.008361	9.625e-26	0.36395	-0.0739817	0.464583
HTN3	Acute lymphocytic leukaemia	rs150022487	chr4	127900150	A	G	0.07224	0.1348	0.015766	1.232e-17	0.0444793	-0.212931	0.369024
HTN3	Acute lymphocytic leukaemia	rs227727	chr17	56699594	T	A	0.47762	-0.0452	0.008202	3.569e-08	0.486672	-0.134011	0.167551
HTN3	Acute lymphocytic leukaemia	rs3749751	chr5	135173987	T	C	0.38867	-0.0943	0.008389	2.555e-29	0.563628	-0.09741	0.318599
HTN3	Acute lymphocytic leukaemia	rs4423274	chr12	11297908	A	G	0.15442	-0.0937	0.011267	9.062e-17	0.855724	0.124612	0.367403
HTN3	Acute lymphocytic leukaemia	rs4793442	chr17	72412730	G	C	0.3331	-0.0602	0.008663	3.668e-12	0.427068	-0.0430859	0.660897
HTN3	Acute lymphocytic leukaemia	rs61762319	chr3	155084189	G	A	0.02082	0.2029	0.028655	1.434e-12	0.021365	-0.385969	0.247073
HTN3	Acute lymphocytic leukaemia	rs61930005	chr12	11214367	A	G	0.12195	0.0917	0.012452	1.784e-13	0.100758	-0.212716	0.187661
HTN3	Acute lymphocytic leukaemia	rs681343	chr19	48703205	T	C	0.3954	0.1264	0.008367	1.469e-51	0.374874	-0.096858	0.335874
HTN3	Acute lymphocytic leukaemia	rs7398041	chr12	10914925	A	G	0.29563	-0.223	0.0089	1.519e-138	0.275858	-0.057723	0.595725
HTN3	Acute lymphocytic leukaemia	rs74801295	chr4	70856691	C	G	0.01437	-0.2179	0.034538	2.81e-10	0.0139554	0.149782	0.737357
HTN3	Acute lymphocytic leukaemia	rs848097	chr14	36792277	C	T	0.39216	0.0469	0.008388	2.251e-08	0.458243	0.00190738	0.984402
APMAP	Acute lymphocytic leukaemia	rs10922098	chr1	196695521	T	C	0.40011	-0.0638	0.00808	2.873e-15	0.561049	-0.00464965	0.961802
APMAP	Acute lymphocytic leukaemia	rs1355538	chr3	165787389	G	A	0.39847	-0.0715	0.008063	7.438e-19	0.672107	-0.150672	0.144439
APMAP	Acute lymphocytic leukaemia	rs6036977	chr20	24921032	T	C	0.11921	-0.1558	0.01203	2.32e-38	0.946622	-0.0807491	0.706457
APMAP	Acute lymphocytic leukaemia	rs6049886	chr20	24702918	T	G	0.31953	-0.0727	0.00853	1.559e-17	0.299698	0.00115413	0.991368
TOR1AIP1	Acute lymphocytic leukaemia	rs137893789	chr6	32087709	A	G	0.03895	-0.2571	0.020224	5.049e-37	0.0274862	-0.522089	0.0747877
TOR1AIP1	Acute lymphocytic leukaemia	rs1926446	chr13	46055860	A	C	0.24321	-0.0635	0.009228	5.939e-12	0.804208	-0.189845	0.122462
TOR1AIP1	Acute lymphocytic leukaemia	rs35580488	chr6	32129644	C	G	0.01346	-0.2251	0.034889	1.104e-10	0.0202228	-0.00305815	0.993249
HTN1	Acute lymphocytic leukaemia	rs11699344	chr20	52721978	T	C	0.19435	0.0584	0.010152	8.783e-09	0.776069	-0.100378	0.391532
HTN1	Acute lymphocytic leukaemia	rs13245946	chr7	101531684	T	C	0.14573	0.065	0.011437	1.323e-08	0.140211	-0.0764353	0.586904
HTN1	Acute lymphocytic leukaemia	rs149110519	chr6	144064640	T	C	0.04822	0.2343	0.01863	2.852e-36	0.0257364	0.407988	0.179466
HTN1	Acute lymphocytic leukaemia	rs2511241	chr11	73234296	T	C	0.08753	0.1206	0.014115	1.294e-17	0.922798	0.052951	0.773891
PLOD3	Acute lymphocytic leukaemia	rs117207573	chr7	105592862	A	G	0.01519	-0.1832	0.033025	2.902e-08	0.0143364	-0.0172138	0.966944
PLOD3	Acute lymphocytic leukaemia	rs142309161	chr7	101304744	T	C	0.017	-0.3678	0.031909	9.701e-31	0.0199962	-0.180012	0.610603
PLOD3	Acute lymphocytic leukaemia	rs144769653	chr7	99486115	T	C	0.02555	-0.2058	0.026183	3.837e-15	0.0118723	-0.624563	0.163256
PLOD3	Acute lymphocytic leukaemia	rs149062332	chr3	186623236	C	T	0.02045	0.1583	0.028166	1.907e-08	0.0289275	-0.174483	0.554593
PLOD3	Acute lymphocytic leukaemia	rs17691833	chr5	173763784	G	A	0.01591	-0.1882	0.03269	8.558e-09	0.0197153	-0.180861	0.608984
PLOD3	Acute lymphocytic leukaemia	rs2477664	chr10	17833817	A	T	0.44816	0.0633	0.008251	1.694e-14	0.467027	0.040272	0.679859
PLOD3	Acute lymphocytic leukaemia	rs62465594	chr7	101348368	T	C	0.02733	-0.1399	0.025526	4.236e-08	0.00977297	0.253535	0.614094
PLOD3	Acute lymphocytic leukaemia	rs692719	chr10	17847598	C	A	0.20095	-0.075	0.010243	2.445e-13	0.87453	-0.168037	0.255718
PLOD3	Acute lymphocytic leukaemia	rs72816176	chr5	173173839	T	C	0.01428	-0.1959	0.03442	1.26e-08	0.00778497	0.301316	0.590443
PLOD3	Acute lymphocytic leukaemia	rs77339260	chr7	97731018	G	C	0.01217	-0.3842	0.037231	5.767e-25	0.0213587	-0.671995	0.0591793
PLOD3	Acute lymphocytic leukaemia	rs9862378	chr3	58338667	T	G	0.49422	-0.0451	0.008216	4.041e-08	0.469569	-0.0218672	0.821783
MPZ	Acute lymphocytic leukaemia	rs1042445	chr3	186677647	T	C	0.23639	0.1117	0.009703	1.142e-30	0.279767	-0.179978	0.0962875
MPZ	Acute lymphocytic leukaemia	rs10755398	chr6	80600914	A	T	0.35275	0.0482	0.008724	3.3e-08	0.278233	0.0652734	0.547834
MPZ	Acute lymphocytic leukaemia	rs114459700	chr1	231372993	C	T	0.0506	0.1701	0.019119	5.743e-19	0.00566662	-0.626216	0.32657
MPZ	Acute lymphocytic leukaemia	rs117350387	chr7	43602837	C	G	0.02181	-0.1832	0.027394	2.268e-11	0.0131001	-0.0682259	0.878031
MPZ	Acute lymphocytic leukaemia	rs117801489	chr12	104015054	C	T	0.04343	0.4798	0.020222	1.926e-124	0.0402759	-0.0464183	0.8538
MPZ	Acute lymphocytic leukaemia	rs12581309	chr12	104452194	A	C	0.11297	0.1184	0.013019	9.519e-20	0.134064	0.269833	0.0649636
MPZ	Acute lymphocytic leukaemia	rs13107325	chr4	102267552	T	C	0.01596	0.2901	0.033809	9.44e-18	0.0138562	0.473714	0.245575
MPZ	Acute lymphocytic leukaemia	rs13269700	chr8	22713095	G	A	0.34845	0.0513	0.008729	4.18e-09	0.305925	0.0291717	0.782653
MPZ	Acute lymphocytic leukaemia	rs139349382	chr12	100232130	A	G	0.02806	0.1587	0.025543	5.193e-10	0.0136074	0.546921	0.194724
MPZ	Acute lymphocytic leukaemia	rs2802788	chr1	203459557	C	T	0.18856	-0.0834	0.010706	6.707e-15	0.250054	0.0373724	0.738219
MPZ	Acute lymphocytic leukaemia	rs3217964	chr7	44118226	C	T	0.25916	-0.1115	0.00958	2.605e-31	0.210156	-0.0355674	0.766514
MPZ	Acute lymphocytic leukaemia	rs4724390	chr7	45330132	G	T	0.20971	0.0593	0.010134	4.875e-09	0.754425	-0.254308	0.0243041
MPZ	Acute lymphocytic leukaemia	rs6541311	chr1	230288384	C	T	0.15446	0.1892	0.01159	6.57e-60	0.1303	-0.0836052	0.55834
MPZ	Acute lymphocytic leukaemia	rs6746339	chr2	162230915	T	C	0.0161	-0.1889	0.034041	2.869e-08	0.0396923	-0.0117363	0.96325
MPZ	Acute lymphocytic leukaemia	rs6759217	chr2	72027967	T	C	0.48142	0.0472	0.008341	1.525e-08	0.449612	-0.05077	0.603785
MPZ	Acute lymphocytic leukaemia	rs7529009	chr1	230096333	G	A	0.43366	0.2333	0.008431	1.558e-168	0.450503	0.0793478	0.417547
MPZ	Acute lymphocytic leukaemia	rs75327292	chr12	103945386	C	G	0.08233	0.1467	0.01534	1.138e-21	0.0831743	0.392665	0.0249908
MPZ	Acute lymphocytic leukaemia	rs78931415	chr1	230572373	A	G	0.03536	-0.1346	0.022488	2.16e-09	0.0543031	0.499249	0.0223049
MPZ	Acute lymphocytic leukaemia	rs79242340	chr1	230358909	C	T	0.0173	-0.1936	0.033244	5.757e-09	0.00461269	-0.513378	0.470873
MPZ	Acute lymphocytic leukaemia	rs8035692	chr15	69117654	C	T	0.40946	0.0507	0.008429	1.797e-09	0.54697	0.144734	0.141327
MSMB	Acute lymphocytic leukaemia	rs11009654	chr10	34123588	T	G	0.04119	-0.1365	0.020859	5.994e-11	0.00394948	1.28788	0.089747
MSMB	Acute lymphocytic leukaemia	rs12412427	chr10	45137463	G	A	0.03534	0.2083	0.022625	3.37e-20	0.0380177	0.155712	0.545248
MSMB	Acute lymphocytic leukaemia	rs138342429	chr10	35247473	C	T	0.03212	-0.1668	0.023539	1.378e-12	0.0211445	-0.125642	0.71034
MSMB	Acute lymphocytic leukaemia	rs144584548	chr10	45428856	A	G	0.02941	-0.5231	0.024777	6.161e-99	0.0118438	0.810755	0.0152859
MSMB	Acute lymphocytic leukaemia	rs1451189	chr10	36221910	A	G	0.01357	-0.2173	0.036284	2.114e-09	0.0130029	-0.646879	0.144417
MSMB	Acute lymphocytic leukaemia	rs200779162	chr10	46156934	A	G	0.06511	-0.5764	0.016572	1e-200	0.0557407	0.189805	0.367948
MSMB	Acute lymphocytic leukaemia	rs2256455	chr10	32930080	G	T	0.29763	0.0545	0.009152	2.598e-09	0.660382	-0.155006	0.130619
MSMB	Acute lymphocytic leukaemia	rs28415845	chr11	1151933	C	T	0.25506	-0.0621	0.007983	7.294e-15	0.66373	0.148843	0.14878
MSMB	Acute lymphocytic leukaemia	rs36126966	chr10	39187439	A	C	0.05883	-0.0982	0.017486	1.954e-08	0.0577893	-0.0335883	0.874596
MSMB	Acute lymphocytic leukaemia	rs4623821	chr10	57568920	T	C	0.17401	-0.0654	0.010882	1.857e-09	0.901301	-0.410023	0.0124294
MSMB	Acute lymphocytic leukaemia	rs4948583	chr10	43939864	C	G	0.2844	0.1669	0.009154	2.808e-74	0.717811	-0.0849745	0.430307
MSMB	Acute lymphocytic leukaemia	rs525202	chr11	34800401	C	A	0.26516	-0.0465	0.007905	4.043e-09	0.708857	0.0343419	0.748392
MSMB	Acute lymphocytic leukaemia	rs61833942	chr10	13568507	C	T	0.01018	-0.2242	0.040993	4.52e-08	0.0223137	-0.362937	0.275103
MSMB	Acute lymphocytic leukaemia	rs61850100	chr10	46105935	A	T	0.06235	-0.7628	0.011029	1e-200	0.0520205	0.0856507	0.698466
MSMB	Acute lymphocytic leukaemia	rs61859378	chr10	43825840	G	A	0.15777	0.1413	0.01135	1.411e-35	0.138772	0.0677802	0.63057
MSMB	Acute lymphocytic leukaemia	rs7254067	chr19	45839627	A	G	0.31371	-0.0608	0.007525	6.484e-16	0.265086	0.0813838	0.461147
MSMB	Acute lymphocytic leukaemia	rs75935865	chr10	47107833	T	C	0.01701	-0.458	0.032675	1.232e-44	0.0526872	0.120469	0.586399
MSMB	Acute lymphocytic leukaemia	rs77487490	chr8	23602663	T	C	0.17072	0.064	0.009262	4.847e-12	0.146908	-0.0760385	0.580742
MSMB	Acute lymphocytic leukaemia	rs77567868	chr10	46164916	G	T	0.01938	0.6373	0.029845	3.599e-101	0.0284601	0.385743	0.194396
MSMB	Acute lymphocytic leukaemia	rs7912117	chr10	62065059	C	T	0.11748	-0.0706	0.012915	4.595e-08	0.835676	0.158002	0.233447
PRR16	Acute lymphocytic leukaemia	rs116869929	chr8	89671499	A	T	0.01972	0.1986	0.027887	1.067e-12	0.0152675	0.0670212	0.868637
PRR16	Acute lymphocytic leukaemia	rs13127052	chr4	82974073	A	G	0.13868	0.0736	0.011468	1.38e-10	0.140353	0.05435	0.697749
PRR16	Acute lymphocytic leukaemia	rs318261	chr8	89214197	C	T	0.3028	0.0508	0.00865	4.286e-09	0.415464	0.0483097	0.625271
PRR16	Acute lymphocytic leukaemia	rs3736639	chr8	89943396	A	T	0.359	-0.1052	0.008304	8.818e-37	0.363413	-0.043299	0.667709
APLP2	Acute lymphocytic leukaemia	rs1071960	chr22	42953626	C	T	0.29144	-0.0499	0.008958	2.545e-08	0.308912	-0.148162	0.161646
APLP2	Acute lymphocytic leukaemia	rs10822155	chr10	63311455	A	C	0.43479	0.0596	0.008207	3.814e-13	0.38431	-0.129449	0.193767
APLP2	Acute lymphocytic leukaemia	rs367768	chr5	122855431	A	C	0.49157	-0.0511	0.008166	3.903e-10	0.613811	0.0341697	0.730932
APLP2	Acute lymphocytic leukaemia	rs6993770	chr8	105569300	T	A	0.22448	-0.12	0.009773	1.173e-34	0.223119	0.0374289	0.74915
APLP2	Acute lymphocytic leukaemia	rs73583419	chr11	130069495	A	C	0.06312	0.2786	0.016588	2.64e-63	0.0341365	0.0738152	0.780725
APLP2	Acute lymphocytic leukaemia	rs741736	chr11	256978	T	C	0.26382	0.0548	0.009228	2.873e-09	0.356697	-0.133908	0.189418
APLP2	Acute lymphocytic leukaemia	rs775824	chr19	55050202	C	T	0.16338	0.061	0.010984	2.796e-08	0.881512	0.461661	0.00406172
HTATIP2	Acute lymphocytic leukaemia	rs11025480	chr11	20304545	A	G	0.21333	0.3213	0.009983	1e-200	0.212692	-0.0975018	0.408594
HTATIP2	Acute lymphocytic leukaemia	rs1356981	chr11	20221745	G	A	0.44745	0.0861	0.008314	3.943e-25	0.552706	-0.0708372	0.469577
HTATIP2	Acute lymphocytic leukaemia	rs1715284	chr11	20665751	T	G	0.19712	-0.1287	0.010405	3.863e-35	0.128355	0.314746	0.0157692
HTATIP2	Acute lymphocytic leukaemia	rs2003174	chr11	20970593	C	G	0.09513	-0.1066	0.01403	3.005e-14	0.104121	-0.0498991	0.753014
HTATIP2	Acute lymphocytic leukaemia	rs342294	chr7	106732176	C	T	0.45409	-0.0492	0.008097	1.232e-09	0.478812	0.0126998	0.896013
HTATIP2	Acute lymphocytic leukaemia	rs34931250	chr17	68883786	T	C	0.08188	0.1385	0.014814	8.835e-21	0.065207	-0.369011	0.0626744
HTATIP2	Acute lymphocytic leukaemia	rs368465	chr1	196702851	C	T	0.39961	-0.073	0.008259	9.671e-19	0.560966	-0.00452725	0.962808
HTATIP2	Acute lymphocytic leukaemia	rs3758807	chr11	20616985	A	G	0.35978	-0.1256	0.008676	1.705e-47	0.358542	0.164214	0.104885
HTATIP2	Acute lymphocytic leukaemia	rs79225249	chr11	20024031	C	G	0.05609	0.147	0.018183	6.254e-16	0.156438	0.0440341	0.742373
OLFM3	Acute lymphocytic leukaemia	rs10922098	chr1	196695521	T	C	0.40011	-0.1381	0.008011	1.354e-66	0.561049	-0.00464965	0.961802
OLFM3	Acute lymphocytic leukaemia	rs1707652	chr3	165761011	T	C	0.3102	0.0701	0.008484	1.424e-16	0.248628	0.196937	0.0791043
OLFM3	Acute lymphocytic leukaemia	rs2384656	chr2	27609188	G	A	0.21641	0.0518	0.00946	4.36e-08	0.278843	-0.0823439	0.448346
OLFM3	Acute lymphocytic leukaemia	rs704	chr17	28367840	A	G	0.49189	0.0668	0.007869	2.085e-17	0.419906	-0.192181	0.050501
OLFM3	Acute lymphocytic leukaemia	rs72749892	chr15	92525256	G	A	0.02117	-0.1523	0.027138	1.999e-08	0.0304839	-0.538834	0.0597957
OLFM3	Acute lymphocytic leukaemia	rs7774739	chr6	32041524	G	A	0.17585	0.0868	0.010974	2.588e-15	0.00283685	-0.0834957	0.932347
ASCC1	Acute lymphocytic leukaemia	rs118137024	chr19	990657	T	C	0.01973	0.2823	0.028897	1.527e-22	0.0146674	-0.0841661	0.83236
ASCC1	Acute lymphocytic leukaemia	rs1619994	chr3	165744047	G	A	0.2807	0.0634	0.00896	1.487e-12	0.253862	0.203883	0.0647739
ASCC1	Acute lymphocytic leukaemia	rs2731672	chr5	177415473	C	T	0.25436	0.0507	0.009289	4.819e-08	0.740714	-0.010159	0.927442
ASCC1	Acute lymphocytic leukaemia	rs62269916	chr3	74348841	A	G	0.03471	0.1254	0.022057	1.307e-08	0.0311729	-0.0211582	0.941117
ASCC1	Acute lymphocytic leukaemia	rs74746093	chr19	484531	C	T	0.02972	0.138	0.023365	3.502e-09	0.0219775	0.467047	0.153888
GNPTG	Acute lymphocytic leukaemia	rs1008764	chr12	89493872	C	T	0.25345	0.0529	0.009343	1.497e-08	0.210674	0.0229192	0.846972
GNPTG	Acute lymphocytic leukaemia	rs1132368	chr16	2037561	A	G	0.04066	0.1162	0.020548	1.557e-08	0.0221883	0.157255	0.632512
GNPTG	Acute lymphocytic leukaemia	rs143501783	chr17	7897001	C	T	0.01116	0.2136	0.037064	8.262e-09	0.00222121	0.146838	0.89431
GNPTG	Acute lymphocytic leukaemia	rs1861877	chr3	186254922	C	G	0.10777	-0.0757	0.013059	6.753e-09	0.075183	-0.144102	0.436306
GNPTG	Acute lymphocytic leukaemia	rs4764823	chr12	101825988	A	G	0.27829	-0.0622	0.009167	1.162e-11	0.281447	0.0773026	0.474758
GNPTG	Acute lymphocytic leukaemia	rs4984644	chr16	1357791	C	T	0.07964	-0.5174	0.014933	1e-200	0.932107	-0.446412	0.0183722
GNPTG	Acute lymphocytic leukaemia	rs58894215	chr16	1048778	T	C	0.02552	0.1725	0.026133	4.09e-11	0.0117897	0.184657	0.679872
GNPTG	Acute lymphocytic leukaemia	rs6600145	chr16	1436397	G	A	0.07929	-0.1272	0.015258	7.632e-17	0.0702007	-0.134687	0.480491
GNPTG	Acute lymphocytic leukaemia	rs660240	chr1	109275216	C	T	0.205	0.0617	0.010114	1.059e-09	0.786955	0.0827046	0.483178
GNPTG	Acute lymphocytic leukaemia	rs72641004	chr1	11952976	G	C	0.17036	-0.0882	0.010886	5.415e-16	0.159856	0.117482	0.377491
GNPTG	Acute lymphocytic leukaemia	rs9272050	chr6	32631294	A	G	0.46524	0.0502	0.008149	7.279e-10	0.557372	-0.0083156	0.933038
GNPTG	Acute lymphocytic leukaemia	rs9928413	chr16	71967211	A	G	0.18655	0.0608	0.010578	9.041e-09	0.25522	-0.0475776	0.671424
SFTPB	Acute lymphocytic leukaemia	rs1130866	chr2	85666618	A	G	0.47918	-0.3953	0.006683	1e-200	0.522654	-0.0564437	0.570386
SFTPB	Acute lymphocytic leukaemia	rs114068223	chr2	85320634	C	T	0.02417	-0.2676	0.027861	7.63e-22	0.00503226	-1.04271	0.136915
SFTPB	Acute lymphocytic leukaemia	rs11569415	chr19	6716268	A	G	0.24276	-0.1286	0.009647	1.541e-40	0.185009	0.117832	0.344104
SFTPB	Acute lymphocytic leukaemia	rs11678909	chr2	98359917	C	G	0.02179	-0.1686	0.029074	6.669e-09	0.00556081	0.563763	0.37118
SFTPB	Acute lymphocytic leukaemia	rs12468241	chr2	82836468	C	T	0.1288	-0.07	0.012567	2.547e-08	0.127736	-0.0434456	0.766839
SFTPB	Acute lymphocytic leukaemia	rs145297992	chr2	85392300	G	A	0.04591	-0.1688	0.019964	2.784e-17	0.0314377	0.136983	0.616479
SFTPB	Acute lymphocytic leukaemia	rs199969223	chr2	95897291	A	G	0.02996	-0.1549	0.025329	9.627e-10	0.0072981	-0.0101446	0.9863
SFTPB	Acute lymphocytic leukaemia	rs35705950	chr11	1219991	T	G	0.12583	0.0877	0.012565	2.955e-12	0.102335	-0.11636	0.482224
TMX2	Acute lymphocytic leukaemia	rs1047286	chr19	6713251	A	G	0.24066	-0.064	0.009279	5.289e-12	0.174618	0.0768747	0.545999
TMX2	Acute lymphocytic leukaemia	rs10922098	chr1	196695521	T	C	0.40011	-0.2112	0.008061	2.688e-151	0.561049	-0.00464965	0.961802
TMX2	Acute lymphocytic leukaemia	rs114009540	chr1	196158413	A	G	0.03606	-0.1279	0.021506	2.727e-09	0.0166561	-0.512092	0.171104
TMX2	Acute lymphocytic leukaemia	rs2686395	chr3	165767231	C	T	0.3101	-0.1094	0.008549	1.709e-37	0.75359	-0.197297	0.0795353
TMX2	Acute lymphocytic leukaemia	rs550671	chr6	31976816	T	C	0.14045	0.1605	0.011384	3.884e-45	0.0767293	0.074595	0.686148
TMX2	Acute lymphocytic leukaemia	rs555007	chr6	31882555	C	T	0.07832	0.1328	0.014776	2.528e-19	0.158514	-0.179443	0.177966
NDUFB4	Acute lymphocytic leukaemia	rs1047286	chr19	6713251	A	G	0.24066	-0.0613	0.009393	6.76e-11	0.174618	0.0768747	0.545999
NDUFB4	Acute lymphocytic leukaemia	rs10801660	chr1	198272225	A	G	0.11574	0.0868	0.012591	5.431e-12	0.112625	-0.377509	0.0135672
NDUFB4	Acute lymphocytic leukaemia	rs112164276	chr6	32481499	G	A	0.07336	0.1097	0.015499	1.466e-12	0.059677	0.267887	0.199803
NDUFB4	Acute lymphocytic leukaemia	rs11272957	chr17	28245826	TTTGTTCCAAACCCC	T	0.44349	-0.2455	0.008102	1e-200	0.538119	0.0763717	0.43398
NDUFB4	Acute lymphocytic leukaemia	rs1160610	chr17	33048645	A	C	0.44388	-0.0513	0.008137	2.897e-10	0.459751	0.0910775	0.34925
NDUFB4	Acute lymphocytic leukaemia	rs117340335	chr17	27977733	G	C	0.03073	-0.1532	0.023781	1.179e-10	0.0349092	0.529565	0.0481815
NDUFB4	Acute lymphocytic leukaemia	rs1265941	chr6	31904575	C	A	0.07271	0.1797	0.015482	3.799e-31	0.151525	-0.170495	0.20855
NDUFB4	Acute lymphocytic leukaemia	rs1329424	chr1	196677046	G	T	0.39735	-0.2984	0.00816	1e-200	0.561252	-0.0051467	0.95774
NDUFB4	Acute lymphocytic leukaemia	rs145439832	chr1	195058235	A	T	0.03851	-0.1279	0.021383	2.213e-09	0.0112039	-0.620693	0.194779
NDUFB4	Acute lymphocytic leukaemia	rs1707652	chr3	165761011	T	C	0.3102	0.1232	0.008667	7.449e-46	0.248628	0.196937	0.0791043
NDUFB4	Acute lymphocytic leukaemia	rs550671	chr6	31976816	T	C	0.14045	0.2223	0.011536	9.631e-83	0.0767293	0.074595	0.686148
NDUFB4	Acute lymphocytic leukaemia	rs72748420	chr1	196141224	T	C	0.07417	0.1059	0.015367	5.517e-12	0.103218	-0.0287614	0.856817
NDUFB4	Acute lymphocytic leukaemia	rs73169117	chr3	167217620	T	C	0.11405	0.0713	0.012746	2.219e-08	0.0494125	0.208298	0.349082
NDUFB4	Acute lymphocytic leukaemia	rs9282801	chr17	27769447	A	C	0.35559	0.0667	0.008505	4.417e-15	0.30508	-0.0466479	0.658626
KLRG2	Acute lymphocytic leukaemia	rs111360378	chr14	105360836	T	C	0.05878	0.1323	0.016975	6.509e-15	0.090143	0.171456	0.327988
KLRG2	Acute lymphocytic leukaemia	rs142678764	chr14	105774396	G	A	0.11056	0.0786	0.012739	6.838e-10	0.113046	0.10874	0.509364
KLRG2	Acute lymphocytic leukaemia	rs34894886	chr14	105955664	T	C	0.37777	0.2771	0.008155	1e-200	0.355609	-0.0401747	0.703148
KLRG2	Acute lymphocytic leukaemia	rs79697519	chr14	105115677	T	C	0.01312	0.2063	0.033703	9.295e-10	0.00377965	0.340435	0.683498
KLRG2	Acute lymphocytic leukaemia	rs9268560	chr6	32421735	G	C	0.43602	0.0559	0.007902	1.506e-12	0.529543	0.0908279	0.348644
IGSF11	Acute lymphocytic leukaemia	rs3761959	chr1	157699488	T	C	0.41639	0.0538	0.007898	9.642e-12	0.416614	-0.223079	0.0236091
IGSF11	Acute lymphocytic leukaemia	rs77333309	chr14	105904007	A	G	0.10776	-0.0914	0.013013	2.163e-12	0.122416	-0.206822	0.182324
IGSF11	Acute lymphocytic leukaemia	rs9273429	chr6	32659679	A	G	0.4381	0.0575	0.007896	3.295e-13	0.641724	0.0531771	0.597996
COL28A1	Acute lymphocytic leukaemia	rs10254101	chr7	151718450	T	C	0.26853	0.052	0.009193	1.546e-08	0.233393	0.190066	0.098578
COL28A1	Acute lymphocytic leukaemia	rs12126578	chr1	106947932	C	A	0.48174	-0.0449	0.008231	4.9e-08	0.377552	0.0526576	0.600376
COL28A1	Acute lymphocytic leukaemia	rs2646260	chr2	237369152	G	A	0.31548	0.0516	0.008864	5.834e-09	0.219416	0.0858432	0.46436
COL28A1	Acute lymphocytic leukaemia	rs3088026	chr21	46129699	T	C	0.09272	-0.0945	0.01416	2.492e-11	0.0861267	-0.0489593	0.776049
COL28A1	Acute lymphocytic leukaemia	rs611462	chr21	44821531	A	G	0.02813	-0.1357	0.024663	3.752e-08	0.0212753	0.443738	0.182658
SUDS3	Acute lymphocytic leukaemia	rs1042663	chr6	31937353	A	G	0.09002	0.1158	0.013787	4.498e-17	0.0648629	0.00130871	0.994773
SUDS3	Acute lymphocytic leukaemia	rs10922098	chr1	196695521	T	C	0.40011	-0.1213	0.008089	7.859e-51	0.561049	-0.00464965	0.961802
SUDS3	Acute lymphocytic leukaemia	rs11569415	chr19	6716268	A	G	0.24276	-0.0556	0.00921	1.573e-09	0.185009	0.117832	0.344104
SUDS3	Acute lymphocytic leukaemia	rs2634465	chr4	55666449	G	A	0.1413	-0.0628	0.011447	4.111e-08	0.215564	-0.0377945	0.751227
GNRH2	Acute lymphocytic leukaemia	rs10922098	chr1	196695521	T	C	0.40011	-0.0704	0.008036	1.941e-18	0.561049	-0.00464965	0.961802
GNRH2	Acute lymphocytic leukaemia	rs11845659	chr14	106127116	T	C	0.42023	-0.05	0.008079	6.051e-10	0.580423	-0.0328452	0.745806
GNRH2	Acute lymphocytic leukaemia	rs2296236	chr20	3039444	T	C	0.16991	-0.2021	0.010378	1.844e-84	0.193687	0.0109784	0.928397
GNRH2	Acute lymphocytic leukaemia	rs6115777	chr20	3067673	G	T	0.40236	-0.0574	0.008023	8.414e-13	0.416267	0.00477567	0.961983
ACE	Acute lymphocytic leukaemia	rs111725844	chr17	63720642	T	C	0.06264	0.3298	0.01681	1.068e-85	0.0718575	0.096269	0.610657
ACE	Acute lymphocytic leukaemia	rs117608058	chr9	133540282	A	G	0.02374	-0.1819	0.025397	7.935e-13	0.0119887	0.878925	0.0510423
ACE	Acute lymphocytic leukaemia	rs142377191	chr17	63571809	A	G	0.02894	0.2677	0.025084	1.377e-26	0.00868967	0.73294	0.1471
ACE	Acute lymphocytic leukaemia	rs143501783	chr17	7897001	C	T	0.01116	0.2169	0.037632	8.225e-09	0.00222121	0.146838	0.89431
ACE	Acute lymphocytic leukaemia	rs144762318	chr17	64326232	T	C	0.02923	0.1877	0.024206	8.877e-15	0.00503664	1.15739	0.0803323
ACE	Acute lymphocytic leukaemia	rs150241958	chr17	63730575	G	A	0.01596	0.3369	0.032051	7.649e-26	0.0110816	-0.384672	0.402988
ACE	Acute lymphocytic leukaemia	rs188635580	chr17	62773581	C	T	0.03089	-0.2002	0.023918	5.75e-17	0.0231394	-0.279406	0.397372
ACE	Acute lymphocytic leukaemia	rs189634497	chr17	61332764	C	T	0.05431	-0.1579	0.018118	2.909e-18	0.0124827	0.0816887	0.849387
ACE	Acute lymphocytic leukaemia	rs2584622	chr17	63832807	A	G	0.07002	0.195	0.016092	8.502e-34	0.94399	0.0261863	0.901654
ACE	Acute lymphocytic leukaemia	rs35166255	chr11	126431861	A	G	0.0367	0.2641	0.020251	7.107e-39	0.0350316	0.271456	0.308075
ACE	Acute lymphocytic leukaemia	rs3744287	chr17	63918558	G	A	0.01112	0.2324	0.040758	1.184e-08	0.00110377	1.43222	0.3624
ACE	Acute lymphocytic leukaemia	rs4277404	chr17	63515392	T	C	0.04118	0.2989	0.020415	1.532e-48	0.0242511	0.0760883	0.810517
ACE	Acute lymphocytic leukaemia	rs4968748	chr17	62992139	A	G	0.25149	-0.3472	0.009319	1e-200	0.261669	0.0700396	0.527208
ACE	Acute lymphocytic leukaemia	rs600038	chr9	133276354	T	C	0.15311	0.3376	0.010929	1e-200	0.776744	0.0380686	0.743346
ACE	Acute lymphocytic leukaemia	rs611593	chr11	126318484	T	G	0.17524	-0.0745	0.010494	1.251e-12	0.219734	-0.092229	0.431376
ACE	Acute lymphocytic leukaemia	rs74905978	chr17	62011454	G	C	0.0193	0.2056	0.030176	9.541e-12	0.044677	-0.454561	0.0497119
ACE	Acute lymphocytic leukaemia	rs75163181	chr17	64011027	C	A	0.01711	-0.3899	0.032322	1.656e-33	0.0173838	-0.133871	0.731036
ACE	Acute lymphocytic leukaemia	rs8103531	chr19	41386069	T	C	0.43807	0.0439	0.007934	3.147e-08	0.642218	0.0570908	0.573834
PSMD5	Acute lymphocytic leukaemia	rs10922098	chr1	196695521	T	C	0.40011	-0.058	0.007986	3.787e-13	0.561049	-0.00464965	0.961802
PSMD5	Acute lymphocytic leukaemia	rs2284350	chr3	52788840	C	T	0.39076	-0.0521	0.007994	7.166e-11	0.401135	-0.00987706	0.920417
PSMD5	Acute lymphocytic leukaemia	rs34160075	chr14	105987878	G	A	0.4079	0.1195	0.00809	2.272e-49	0.3555	-0.0320303	0.75925
PSMD5	Acute lymphocytic leukaemia	rs3917550	chr7	95305261	A	G	0.15554	0.0677	0.010806	3.727e-10	0.15046	0.0158191	0.907874
HS3ST5	Acute lymphocytic leukaemia	rs12132412	chr1	21493549	G	A	0.34943	-0.0487	0.008399	6.708e-09	0.402868	-0.073582	0.458448
HS3ST5	Acute lymphocytic leukaemia	rs1914886	chr17	21393104	A	G	0.42279	-0.0528	0.008165	1e-10	0.416831	0.0355146	0.717609
HS3ST5	Acute lymphocytic leukaemia	rs2420378	chr1	169600680	T	A	0.34773	-0.0509	0.008379	1.242e-09	0.520609	0.0301603	0.757122
HS3ST5	Acute lymphocytic leukaemia	rs35136575	chr19	44935906	G	C	0.28501	-0.0624	0.008844	1.72e-12	0.257643	0.126761	0.254116
HS3ST5	Acute lymphocytic leukaemia	rs429358	chr19	44908684	C	T	0.17407	-0.0997	0.010634	6.873e-21	0.183691	-0.00543693	0.965377
HS3ST5	Acute lymphocytic leukaemia	rs704	chr17	28367840	A	G	0.49189	0.255	0.007922	1e-200	0.419906	-0.192181	0.050501
HS3ST5	Acute lymphocytic leukaemia	rs7535409	chr1	169537003	G	A	0.33792	-0.0584	0.008418	3.99e-12	0.306889	0.0246756	0.814482
GAL3ST2	Acute lymphocytic leukaemia	rs10801660	chr1	198272225	A	G	0.11574	0.082	0.012584	7.206e-11	0.112625	-0.377509	0.0135672
GAL3ST2	Acute lymphocytic leukaemia	rs111696008	chr2	216622986	A	G	0.02443	-0.1615	0.026773	1.618e-09	0.0147953	-0.259231	0.513244
GAL3ST2	Acute lymphocytic leukaemia	rs1265941	chr6	31904575	C	A	0.07271	0.1642	0.015495	3.071e-26	0.151525	-0.170495	0.20855
GAL3ST2	Acute lymphocytic leukaemia	rs1329424	chr1	196677046	G	T	0.39735	-0.2716	0.008175	1e-200	0.561252	-0.0051467	0.95774
GAL3ST2	Acute lymphocytic leukaemia	rs144202860	chr2	216625740	A	G	0.01274	-0.1954	0.035836	4.962e-08	0.0209708	0.655042	0.0108775
GAL3ST2	Acute lymphocytic leukaemia	rs2686395	chr3	165767231	C	T	0.3101	-0.1455	0.008674	3.765e-63	0.75359	-0.197297	0.0795353
GAL3ST2	Acute lymphocytic leukaemia	rs35136575	chr19	44935906	G	C	0.28501	-0.0659	0.008933	1.621e-13	0.257643	0.126761	0.254116
GAL3ST2	Acute lymphocytic leukaemia	rs550671	chr6	31976816	T	C	0.14045	0.1891	0.011555	3.413e-60	0.0767293	0.074595	0.686148
GAL3ST2	Acute lymphocytic leukaemia	rs72748420	chr1	196141224	T	C	0.07417	0.0917	0.015358	2.362e-09	0.103218	-0.0287614	0.856817
PCDHB2	Acute lymphocytic leukaemia	rs10922098	chr1	196695521	T	C	0.40011	-0.1919	0.007991	1.952e-127	0.561049	-0.00464965	0.961802
PCDHB2	Acute lymphocytic leukaemia	rs11064498	chr12	7064203	G	A	0.1306	-0.0815	0.011848	6.041e-12	0.225453	-0.0581827	0.616676
PCDHB2	Acute lymphocytic leukaemia	rs11720167	chr3	165768357	G	T	0.19032	0.0997	0.009998	2.025e-23	0.17406	0.236308	0.062939
PCDHB2	Acute lymphocytic leukaemia	rs3863087	chr3	165792099	A	G	0.09559	-0.0831	0.01358	9.403e-10	0.910319	-0.364013	0.0122752
PCDHB2	Acute lymphocytic leukaemia	rs550671	chr6	31976816	T	C	0.14045	0.1495	0.011286	4.72e-40	0.0767293	0.074595	0.686148
PCDHB2	Acute lymphocytic leukaemia	rs56317765	chr20	37489853	T	C	0.15401	0.0617	0.0109	1.511e-08	0.177035	0.0504005	0.690912
PCDHB2	Acute lymphocytic leukaemia	rs7084817	chr10	7732395	G	C	0.03465	-0.1708	0.021784	4.483e-15	0.0629909	-0.209694	0.292834
PCDHB2	Acute lymphocytic leukaemia	rs9469195	chr6	32617235	G	C	0.37544	0.0698	0.00809	6.218e-18	0.37734	-0.104164	0.300841
CDYL2	Acute lymphocytic leukaemia	rs10922098	chr1	196695521	T	C	0.40011	-0.0634	0.008247	1.5e-14	0.561049	-0.00464965	0.961802
CDYL2	Acute lymphocytic leukaemia	rs2299257	chr7	95313453	C	A	0.37897	0.0467	0.008352	2.252e-08	0.351316	-0.0808908	0.427045
CDYL2	Acute lymphocytic leukaemia	rs4452009	chr17	21391421	A	C	0.49803	-0.0459	0.008131	1.651e-08	0.50633	-0.0142651	0.883
CDYL2	Acute lymphocytic leukaemia	rs62083752	chr17	58290785	T	C	0.12173	-0.0946	0.012337	1.744e-14	0.117807	-0.106296	0.478177
CDYL2	Acute lymphocytic leukaemia	rs704	chr17	28367840	A	G	0.49189	0.177	0.008055	5.196e-107	0.419906	-0.192181	0.050501
ADAM7	Acute lymphocytic leukaemia	rs113954333	chr17	28251133	C	T	0.09416	-0.1287	0.013544	2.058e-21	0.0844466	0.157292	0.366066
ADAM7	Acute lymphocytic leukaemia	rs241777	chr17	28306590	T	C	0.45532	-0.2392	0.007812	1e-200	0.555717	0.111617	0.252614
ADAM7	Acute lymphocytic leukaemia	rs71427346	chr14	106544067	G	A	0.25917	0.0704	0.009218	2.224e-14	0.610331	-0.173017	0.0880866
PROK2	Acute lymphocytic leukaemia	rs10896415	chr11	69071866	A	G	0.37201	-0.0577	0.008611	2.075e-11	0.296038	0.00354787	0.973564
PROK2	Acute lymphocytic leukaemia	rs116198731	chr3	69474148	C	T	0.01599	0.1893	0.034111	2.864e-08	0.00566915	0.61881	0.356675
PROK2	Acute lymphocytic leukaemia	rs138866676	chr3	70273106	T	C	0.02635	0.1832	0.026856	9.001e-12	0.0234515	0.0938185	0.77084
PROK2	Acute lymphocytic leukaemia	rs17009077	chr3	71892003	G	A	0.28852	-0.1229	0.00955	6.729e-38	0.266383	0.0023982	0.982598
PROK2	Acute lymphocytic leukaemia	rs2511241	chr11	73234296	T	C	0.08753	0.2998	0.014634	2.841e-93	0.922798	0.052951	0.773891
PROK2	Acute lymphocytic leukaemia	rs3809627	chr16	30091839	A	C	0.42241	0.0479	0.008451	1.444e-08	0.482907	0.0802806	0.410471
PROK2	Acute lymphocytic leukaemia	rs4264815	chr4	152743406	C	T	0.41442	-0.0527	0.008497	5.57e-10	0.494507	0.049067	0.61692
PROK2	Acute lymphocytic leukaemia	rs4677042	chr3	71732550	G	C	0.1278	0.6182	0.009301	1e-200	0.121369	-0.113751	0.441755
PROK2	Acute lymphocytic leukaemia	rs56318703	chr10	909566	T	C	0.24229	0.081	0.009696	6.591e-17	0.19296	-0.149754	0.224019
PROK2	Acute lymphocytic leukaemia	rs62135367	chr2	43116519	G	C	0.2726	0.0551	0.009385	4.337e-09	0.295275	0.00657721	0.950764
PROK2	Acute lymphocytic leukaemia	rs6549404	chr3	71715045	A	T	0.27595	-0.1543	0.009687	3.976e-57	0.326595	-0.022317	0.828979
PROK2	Acute lymphocytic leukaemia	rs9266228	chr6	31357543	C	G	0.49096	-0.0788	0.008382	5.388e-21	0.607893	0.00115273	0.990725
PROK2	Acute lymphocytic leukaemia	rs9809964	chr3	72628421	A	C	0.04747	0.1303	0.019962	6.689e-11	0.0431227	-0.0204449	0.930806
PROK2	Acute lymphocytic leukaemia	rs9898547	chr17	39979773	T	G	0.44771	-0.1002	0.008386	6.661e-33	0.438935	0.0239962	0.806204
KERA	Acute lymphocytic leukaemia	rs10920636	chr1	203402861	A	G	0.4918	0.2496	0.008231	1e-200	0.565022	-0.0901414	0.35745
KERA	Acute lymphocytic leukaemia	rs1265941	chr6	31904575	C	A	0.07271	0.1027	0.015899	1.05e-10	0.151525	-0.170495	0.20855
KERA	Acute lymphocytic leukaemia	rs1362245	chr2	229265954	A	G	0.28531	0.0523	0.009181	1.224e-08	0.19419	0.0113832	0.926372
KERA	Acute lymphocytic leukaemia	rs186033146	chr12	104377858	T	C	0.0428	-0.1666	0.020307	2.324e-16	0.00913465	0.325814	0.558681
KERA	Acute lymphocytic leukaemia	rs2686395	chr3	165767231	C	T	0.3101	-0.0662	0.008929	1.226e-13	0.75359	-0.197297	0.0795353
KERA	Acute lymphocytic leukaemia	rs550671	chr6	31976816	T	C	0.14045	0.1035	0.011873	2.844e-18	0.0767293	0.074595	0.686148
GRIA4	Acute lymphocytic leukaemia	rs115884658	chr6	31896761	A	G	0.04295	-0.2478	0.020047	4.251e-35	0.0347072	0.420845	0.105222
GRIA4	Acute lymphocytic leukaemia	rs181063261	chr6	31933008	T	C	0.05001	-0.4383	0.018695	1.516e-121	0.0311948	-0.412234	0.141034
GRIA4	Acute lymphocytic leukaemia	rs2284179	chr6	31974114	G	T	0.03718	0.3241	0.021459	1.539e-51	0.0230255	0.0197974	0.951169
GRIA4	Acute lymphocytic leukaemia	rs451652	chr6	32041507	A	G	0.13221	0.2183	0.012303	1.952e-70	0.00509755	-0.102632	0.881778
GRIA4	Acute lymphocytic leukaemia	rs56194989	chr6	31235376	C	A	0.012	0.2144	0.038341	2.246e-08	0.00421602	-0.443504	0.549641
GRIA4	Acute lymphocytic leukaemia	rs62395855	chr6	31917132	T	C	0.02271	0.1751	0.027827	3.126e-10	0.036473	0.214254	0.417562
GRIA4	Acute lymphocytic leukaemia	rs7774739	chr6	32041524	G	A	0.17585	0.1886	0.011403	1.915e-61	0.00283685	-0.0834957	0.932347
GRIA4	Acute lymphocytic leukaemia	rs9501265	chr6	33090511	G	A	0.05985	-0.1039	0.017312	1.953e-09	0.0577511	-0.179251	0.373994
TMED2	Acute lymphocytic leukaemia	rs1355538	chr3	165787389	G	A	0.39847	-0.0689	0.008042	1.06e-17	0.672107	-0.150672	0.144439
TMED2	Acute lymphocytic leukaemia	rs34927613	chr6	32632434	A	G	0.29339	0.0526	0.008585	8.961e-10	0.32891	-0.0342339	0.742169
TMED2	Acute lymphocytic leukaemia	rs454212	chr6	31966595	T	C	0.13896	0.0881	0.011361	8.873e-15	0.0767402	0.0740834	0.688169
KLRG2	Acute lymphocytic leukaemia	rs10922098	chr1	196695521	T	C	0.40011	-0.0741	0.008177	1.282e-19	0.561049	-0.00464965	0.961802
KLRG2	Acute lymphocytic leukaemia	rs142860569	chr1	206823039	T	C	0.05869	0.103	0.017074	1.614e-09	0.0322578	-0.343599	0.212879
KLRG2	Acute lymphocytic leukaemia	rs2491393	chr1	207126914	G	A	0.32234	0.0786	0.008568	4.56e-20	0.448397	0.0601018	0.540239
KLRG2	Acute lymphocytic leukaemia	rs2808466	chr1	207100406	C	T	0.11154	0.2891	0.012694	8.178e-115	0.100954	-0.354476	0.0270633
CSGALNACT2	Acute lymphocytic leukaemia	rs10922098	chr1	196695521	T	C	0.40011	-0.15	0.008042	1.204e-77	0.561049	-0.00464965	0.961802
CSGALNACT2	Acute lymphocytic leukaemia	rs1355538	chr3	165787389	G	A	0.39847	-0.0693	0.008048	7.265e-18	0.672107	-0.150672	0.144439
CSGALNACT2	Acute lymphocytic leukaemia	rs2435382	chr10	43181651	T	A	0.33153	-0.1148	0.008361	6.609e-43	0.301424	-0.0397042	0.706856
CSGALNACT2	Acute lymphocytic leukaemia	rs550671	chr6	31976816	T	C	0.14045	0.1092	0.011329	5.488e-22	0.0767293	0.074595	0.686148
CSGALNACT2	Acute lymphocytic leukaemia	rs62404084	chr6	32635544	T	C	0.21057	0.0591	0.00962	8.086e-10	0.292824	0.0262053	0.807486
CSGALNACT2	Acute lymphocytic leukaemia	rs6542680	chr2	3592552	T	C	0.18362	-0.124	0.010201	5.317e-34	0.648336	-0.149514	0.147278
CLEC4G	Acute lymphocytic leukaemia	rs1801701	chr2	21005955	T	C	0.12795	-0.3709	0.012024	1e-200	0.0783487	0.134989	0.447726
CLEC4G	Acute lymphocytic leukaemia	rs3863087	chr3	165792099	A	G	0.09559	-0.1104	0.014133	5.647e-15	0.910319	-0.364013	0.0122752
CLEC4G	Acute lymphocytic leukaemia	rs62122042	chr2	20522215	A	T	0.10816	-0.074	0.013171	1.928e-08	0.0814861	0.383577	0.0301453
CLEC4G	Acute lymphocytic leukaemia	rs6445035	chr3	165762312	A	G	0.1904	0.1356	0.010388	6.07e-39	0.176283	0.234745	0.0632135
CLEC4G	Acute lymphocytic leukaemia	rs78810414	chr8	20013602	T	C	0.08751	-0.0908	0.01439	2.794e-10	0.0877954	-0.0621779	0.718017
SERPINH1	Acute lymphocytic leukaemia	rs1354034	chr3	56815721	C	T	0.38119	0.0488	0.008232	3.071e-09	0.704977	-0.125325	0.242803
SERPINH1	Acute lymphocytic leukaemia	rs2588512	chr2	54964946	G	A	0.19505	-0.0743	0.010125	2.168e-13	0.173781	0.0270237	0.833529
SERPINH1	Acute lymphocytic leukaemia	rs514887	chr11	75581004	A	G	0.44086	0.1232	0.008064	1.072e-52	0.538257	0.124329	0.201412
SERPINH1	Acute lymphocytic leukaemia	rs72673731	chr8	105524039	T	C	0.19205	0.0647	0.010222	2.46e-10	0.196305	0.0773973	0.528625
SERPINH1	Acute lymphocytic leukaemia	rs7782210	chr7	50309149	G	A	0.37368	0.0495	0.008283	2.286e-09	0.363582	-0.00187653	0.985133
SERPINH1	Acute lymphocytic leukaemia	rs9656588	chr7	50267184	C	T	0.34123	-0.0659	0.008453	6.409e-15	0.711517	-0.00183156	0.986433
SERPINH1	Acute lymphocytic leukaemia	rs9865425	chr3	12720958	C	T	0.47629	0.0632	0.008029	3.497e-15	0.542659	0.00918896	0.925286
KLRB1	Acute lymphocytic leukaemia	rs10691349	chr12	9584213	ATTGT	A	0.13729	0.0788	0.011497	7.182e-12	0.102265	-0.0671672	0.673398
KLRB1	Acute lymphocytic leukaemia	rs1135816	chr12	9598073	G	A	0.37818	-0.2296	0.008094	5.361e-177	0.478561	0.0190512	0.845943
KLRB1	Acute lymphocytic leukaemia	rs118021813	chr12	9889577	C	T	0.06111	-0.0966	0.016561	5.447e-09	0.0242018	0.0629082	0.842715
KLRB1	Acute lymphocytic leukaemia	rs139517772	chr12	9125550	C	A	0.0209	-0.1543	0.027023	1.13e-08	0.0197496	-0.109233	0.751308
KLRB1	Acute lymphocytic leukaemia	rs697356	chr3	165718150	C	G	0.36502	0.0448	0.008174	4.238e-08	0.322253	0.135682	0.190749
KLRB1	Acute lymphocytic leukaemia	rs713452	chr1	56920602	C	T	0.29838	0.0695	0.008553	4.448e-16	0.386055	-0.0446833	0.655188
KLRB1	Acute lymphocytic leukaemia	rs7310615	chr12	111427245	G	C	0.37607	-0.0493	0.008152	1.469e-09	0.586289	0.0080154	0.935264
KLRB1	Acute lymphocytic leukaemia	rs7862602	chr9	136946019	T	G	0.43654	0.1026	0.007935	3.067e-38	0.500975	-0.1613	0.0948309
KLRB1	Acute lymphocytic leukaemia	rs8117436	chr20	1946357	A	G	0.06351	0.0877	0.016042	4.578e-08	0.0466829	-0.14197	0.540413
CD1A	Acute lymphocytic leukaemia	rs1047286	chr19	6713251	A	G	0.24066	-0.0524	0.009325	1.919e-08	0.174618	0.0768747	0.545999
CD1A	Acute lymphocytic leukaemia	rs10922098	chr1	196695521	T	C	0.40011	-0.2251	0.008098	4.8e-170	0.561049	-0.00464965	0.961802
CD1A	Acute lymphocytic leukaemia	rs111696008	chr2	216622986	A	G	0.02443	-0.1487	0.026512	2.037e-08	0.0147953	-0.259231	0.513244
CD1A	Acute lymphocytic leukaemia	rs114009540	chr1	196158413	A	G	0.03606	-0.1209	0.021621	2.248e-08	0.0166561	-0.512092	0.171104
CD1A	Acute lymphocytic leukaemia	rs1707652	chr3	165761011	T	C	0.3102	0.1218	0.008593	1.307e-45	0.248628	0.196937	0.0791043
CD1A	Acute lymphocytic leukaemia	rs550671	chr6	31976816	T	C	0.14045	0.1726	0.011437	1.846e-51	0.0767293	0.074595	0.686148
CD1A	Acute lymphocytic leukaemia	rs72848922	chr2	88948138	C	G	0.08931	-0.1005	0.01401	7.319e-13	0.0536043	-0.202116	0.348314
HABP4	Acute lymphocytic leukaemia	rs116836559	chr9	93102773	G	A	0.01249	0.2113	0.034163	6.21e-10	0.00315576	-1.01432	0.206453
HABP4	Acute lymphocytic leukaemia	rs147602960	chr9	97066766	G	A	0.02854	0.2744	0.024165	6.969e-30	0.0340011	0.391176	0.143961
HABP4	Acute lymphocytic leukaemia	rs473902	chr9	95493953	G	T	0.0805	0.0907	0.014667	6.254e-10	0.0983898	0.0204508	0.898642
HABP4	Acute lymphocytic leukaemia	rs58088508	chr9	96324935	C	G	0.22792	0.3486	0.009397	1e-200	0.266168	0.141428	0.197419
HABP4	Acute lymphocytic leukaemia	rs6695321	chr1	196706731	G	A	0.40304	-0.0496	0.008084	8.487e-10	0.409447	0.0112631	0.908968
PILRA	Acute lymphocytic leukaemia	rs117466579	chr7	85686314	C	A	0.01834	0.167	0.029858	2.229e-08	0.0116662	-0.0809611	0.854008
PILRA	Acute lymphocytic leukaemia	rs117850863	chr7	99276953	T	G	0.03088	0.8264	0.022857	1e-200	0.00465352	1.41975	0.0533372
PILRA	Acute lymphocytic leukaemia	rs118045511	chr7	111802503	C	T	0.01777	0.1647	0.02973	3.028e-08	0.0216663	0.213548	0.522146
PILRA	Acute lymphocytic leukaemia	rs1206383	chr7	122015755	G	A	0.08025	-0.0824	0.014652	1.867e-08	0.92138	0.00730369	0.968125
PILRA	Acute lymphocytic leukaemia	rs12670513	chr7	97534099	G	T	0.20016	-0.1211	0.009933	3.428e-34	0.204037	-0.0708579	0.553353
PILRA	Acute lymphocytic leukaemia	rs12705068	chr7	100019125	T	C	0.0266	0.9361	0.024877	1e-200	0.0193539	0.662151	0.0714924
PILRA	Acute lymphocytic leukaemia	rs138702212	chr7	110608714	T	C	0.01157	0.1995	0.035331	1.637e-08	0.00686432	0.19922	0.718462
PILRA	Acute lymphocytic leukaemia	rs140711669	chr7	100653245	C	G	0.03083	-0.3564	0.022643	8.071e-56	0.0131314	-0.238189	0.590897
PILRA	Acute lymphocytic leukaemia	rs143036628	chr7	103401145	G	A	0.0213	0.2874	0.027166	3.708e-26	0.00414245	-0.471398	0.535252
PILRA	Acute lymphocytic leukaemia	rs143364347	chr7	101226262	A	G	0.01561	0.7139	0.031966	1.753e-110	0.0233605	-0.054622	0.868581
PILRA	Acute lymphocytic leukaemia	rs146216542	chr7	8321631	A	G	0.03926	0.1208	0.020539	4.065e-09	0.07349	0.466846	0.012218
PILRA	Acute lymphocytic leukaemia	rs148292738	chr7	81714369	G	A	0.021	-0.1987	0.028085	1.495e-12	0.00434459	-1.03997	0.155611
PILRA	Acute lymphocytic leukaemia	rs149744179	chr7	100437664	T	C	0.01795	-0.4345	0.029726	2.199e-48	0.0146152	-0.24366	0.541554
PILRA	Acute lymphocytic leukaemia	rs199974872	chr7	99825735	GA	G	0.02384	-0.411	0.025535	2.737e-58	0.0372986	0.0232288	0.926531
PILRA	Acute lymphocytic leukaemia	rs45454594	chr7	99444550	A	C	0.04987	0.6173	0.018062	1e-200	0.0362803	0.192058	0.453005
PILRA	Acute lymphocytic leukaemia	rs55867908	chr7	100804512	C	A	0.01212	0.8678	0.035981	1.614e-128	0.0116888	0.763706	0.0878112
PILRA	Acute lymphocytic leukaemia	rs5745757	chr7	81704940	A	G	0.01029	-0.2253	0.039777	1.478e-08	0.0361181	0.156696	0.561042
PILRA	Acute lymphocytic leukaemia	rs62467851	chr7	92420223	A	G	0.02349	0.1671	0.026547	3.085e-10	0.0235991	0.025783	0.936923
PILRA	Acute lymphocytic leukaemia	rs62482204	chr7	100398887	A	G	0.01703	0.8826	0.03042	4.39e-185	0.00321947	1.07507	0.197507
PILRA	Acute lymphocytic leukaemia	rs712846	chr7	101677291	G	A	0.31797	0.1385	0.008541	3.88e-59	0.291258	-0.0849	0.42867
PILRA	Acute lymphocytic leukaemia	rs73203019	chr7	111453363	G	C	0.06499	0.1011	0.01608	3.228e-10	0.0317125	0.15016	0.585751
PILRA	Acute lymphocytic leukaemia	rs73405382	chr7	100509350	G	C	0.10169	-0.4146	0.012947	1e-200	0.132189	-0.129062	0.367909
PILRA	Acute lymphocytic leukaemia	rs75126895	chr7	99924066	C	T	0.04627	-0.3994	0.018752	1.156e-100	0.0260736	-0.273584	0.373618
PILRA	Acute lymphocytic leukaemia	rs76265464	chr7	99883893	C	T	0.01535	-0.4186	0.032241	1.52e-38	0.044284	-0.233578	0.317651
PILRA	Acute lymphocytic leukaemia	rs78690606	chr7	100492646	A	C	0.01013	0.8815	0.039318	2.52e-111	0.0578042	-0.179008	0.386581
PILRA	Acute lymphocytic leukaemia	rs79858296	chr7	86715697	A	C	0.12056	-0.0823	0.012316	2.35e-11	0.0398234	-0.0503234	0.841628
TOMM20L	Acute lymphocytic leukaemia	rs1047286	chr19	6713251	A	G	0.24066	-0.0602	0.00937	1.323e-10	0.174618	0.0768747	0.545999
TOMM20L	Acute lymphocytic leukaemia	rs10801660	chr1	198272225	A	G	0.11574	0.0756	0.012505	1.49e-09	0.112625	-0.377509	0.0135672
TOMM20L	Acute lymphocytic leukaemia	rs112164276	chr6	32481499	G	A	0.07336	0.0958	0.015438	5.453e-10	0.059677	0.267887	0.199803
TOMM20L	Acute lymphocytic leukaemia	rs1265941	chr6	31904575	C	A	0.07271	0.1579	0.01542	1.313e-24	0.151525	-0.170495	0.20855
TOMM20L	Acute lymphocytic leukaemia	rs1329424	chr1	196677046	G	T	0.39735	-0.2631	0.008137	1e-200	0.561252	-0.0051467	0.95774
TOMM20L	Acute lymphocytic leukaemia	rs2686395	chr3	165767231	C	T	0.3101	-0.1214	0.008636	6.916e-45	0.75359	-0.197297	0.0795353
TOMM20L	Acute lymphocytic leukaemia	rs550671	chr6	31976816	T	C	0.14045	0.1925	0.011499	6.686e-63	0.0767293	0.074595	0.686148
TOMM20L	Acute lymphocytic leukaemia	rs72748420	chr1	196141224	T	C	0.07417	0.0851	0.015288	2.597e-08	0.103218	-0.0287614	0.856817
SMPD1	Acute lymphocytic leukaemia	rs112963922	chr14	94411531	T	C	0.01119	0.2218	0.038561	8.823e-09	0.0313888	-0.255379	0.360445
SMPD1	Acute lymphocytic leukaemia	rs113199701	chr11	6591621	T	C	0.0387	0.128	0.022001	5.96e-09	0.0213278	-0.231208	0.503912
SMPD1	Acute lymphocytic leukaemia	rs1154988	chr3	136206349	A	T	0.22728	0.0632	0.009878	1.573e-10	0.852048	0.101971	0.457222
SMPD1	Acute lymphocytic leukaemia	rs117210486	chr11	6400929	T	G	0.03233	-0.2693	0.023341	8.511e-31	0.0114981	0.654872	0.151818
SMPD1	Acute lymphocytic leukaemia	rs12743641	chr1	172622949	A	G	0.25863	0.0553	0.009386	3.815e-09	0.330635	0.0135606	0.895454
SMPD1	Acute lymphocytic leukaemia	rs139736720	chr11	5080729	A	G	0.0135	0.2147	0.037078	7.021e-09	0.0336611	-0.106397	0.694752
SMPD1	Acute lymphocytic leukaemia	rs142303644	chr11	6300695	T	C	0.02445	-0.2121	0.027837	2.552e-14	0.0218276	0.313277	0.3667
SMPD1	Acute lymphocytic leukaemia	rs1707652	chr3	165761011	T	C	0.3102	0.0854	0.00888	6.769e-22	0.248628	0.196937	0.0791043
SMPD1	Acute lymphocytic leukaemia	rs17532371	chr13	41061165	G	C	0.06781	0.0927	0.016344	1.413e-08	0.0399339	0.177745	0.471727
SMPD1	Acute lymphocytic leukaemia	rs2946833	chr12	102322796	G	T	0.16935	0.0739	0.011202	4.188e-11	0.841057	0.0995747	0.453463
SMPD1	Acute lymphocytic leukaemia	rs339969	chr15	60591082	A	C	0.33988	0.0589	0.008666	1.068e-11	0.72123	0.166322	0.12643
SMPD1	Acute lymphocytic leukaemia	rs3923092	chr11	7483560	A	G	0.22443	-0.0671	0.010013	2.062e-11	0.162644	0.139646	0.295965
SMPD1	Acute lymphocytic leukaemia	rs41280463	chr4	153270074	A	G	0.18512	-0.0715	0.010616	1.641e-11	0.196437	-0.00760742	0.950324
SMPD1	Acute lymphocytic leukaemia	rs429358	chr19	44908684	C	T	0.17407	-0.0752	0.010969	7.105e-12	0.183691	-0.00543693	0.965377
SMPD1	Acute lymphocytic leukaemia	rs4681749	chr3	57703214	G	A	0.18216	0.0603	0.010667	1.577e-08	0.804037	-0.0166887	0.892336
SMPD1	Acute lymphocytic leukaemia	rs55707100	chr15	43528519	T	C	0.02732	0.1872	0.025126	9.305e-14	0.0051542	-0.118331	0.859581
SMPD1	Acute lymphocytic leukaemia	rs56055826	chr4	118868269	A	T	0.06196	-0.1094	0.017255	2.297e-10	0.0765896	-0.136956	0.456359
SMPD1	Acute lymphocytic leukaemia	rs56255430	chr19	19367068	C	A	0.0795	0.1385	0.015313	1.502e-19	0.06543	-0.0435751	0.82371
SMPD1	Acute lymphocytic leukaemia	rs57528411	chr11	6237459	A	G	0.09364	0.0989	0.014441	7.452e-12	0.117537	-0.0626011	0.681475
SMPD1	Acute lymphocytic leukaemia	rs60167606	chr12	101558771	A	G	0.183	-0.0948	0.010854	2.458e-18	0.160969	0.0644433	0.628769
SMPD1	Acute lymphocytic leukaemia	rs62061733	chr17	45941033	G	A	0.18202	0.0654	0.010737	1.12e-09	0.0859146	0.228541	0.191415
SMPD1	Acute lymphocytic leukaemia	rs67057049	chr12	103576792	C	G	0.38785	-0.0485	0.008581	1.583e-08	0.427079	0.0338024	0.730352
SMPD1	Acute lymphocytic leukaemia	rs6858114	chr4	76277312	A	G	0.38625	0.0494	0.008431	4.647e-09	0.34415	-0.0539226	0.599366
SMPD1	Acute lymphocytic leukaemia	rs7036351	chr9	34592701	T	C	0.19176	0.0724	0.010429	3.855e-12	0.133865	0.324523	0.023167
SMPD1	Acute lymphocytic leukaemia	rs738409	chr22	43928847	G	C	0.22998	0.0599	0.009782	9.141e-10	0.227423	0.0415003	0.721347
SMPD1	Acute lymphocytic leukaemia	rs77690773	chr11	6428913	C	T	0.02636	-0.1693	0.025647	4.082e-11	0.0119153	-0.126952	0.773517
SMPD1	Acute lymphocytic leukaemia	rs78444298	chr1	184702964	A	G	0.01105	-0.3267	0.039545	1.438e-16	0.0177339	-0.631513	0.0871345
SMPD1	Acute lymphocytic leukaemia	rs7897379	chr10	63541965	C	T	0.48021	0.0834	0.00824	4.432e-24	0.474838	-0.245959	0.0114135
SMPD1	Acute lymphocytic leukaemia	rs7980436	chr12	101707848	T	C	0.09286	-0.2692	0.014481	3.839e-77	0.0978561	0.121245	0.461209
SMPD1	Acute lymphocytic leukaemia	rs8736	chr19	54173495	C	T	0.41652	-0.0741	0.008387	9.97e-19	0.605751	0.157222	0.115515
SMPD1	Acute lymphocytic leukaemia	rs9639523	chr7	25952357	T	G	0.33286	0.0514	0.008703	3.501e-09	0.355566	-0.0285693	0.777174
B4GALT6	Acute lymphocytic leukaemia	rs113633457	chr18	31701321	T	A	0.01098	-0.719	0.039776	4.888e-73	0.00215741	1.29619	0.232578
B4GALT6	Acute lymphocytic leukaemia	rs117474269	chr18	44999000	A	G	0.03106	0.1515	0.024128	3.408e-10	0.0108731	0.518598	0.287821
B4GALT6	Acute lymphocytic leukaemia	rs1260326	chr2	27508073	C	T	0.34132	0.048	0.008534	1.86e-08	0.650149	0.116298	0.253911
B4GALT6	Acute lymphocytic leukaemia	rs12608350	chr18	30248345	C	T	0.43557	-0.0774	0.008397	3.047e-20	0.499155	0.11693	0.227922
B4GALT6	Acute lymphocytic leukaemia	rs138902810	chr18	33213376	G	C	0.01697	-0.3312	0.032414	1.649e-24	0.034337	-0.0449383	0.868662
B4GALT6	Acute lymphocytic leukaemia	rs140118846	chr12	111280204	A	G	0.0313	-0.1357	0.022785	2.589e-09	0.00809304	-0.441234	0.408916
B4GALT6	Acute lymphocytic leukaemia	rs142098862	chr18	31441439	A	G	0.013	-0.373	0.037114	9.172e-24	0.00189726	0.192944	0.865393
B4GALT6	Acute lymphocytic leukaemia	rs147694814	chr18	29701866	A	G	0.02874	0.213	0.025428	5.445e-17	0.0558212	-0.145954	0.494776
B4GALT6	Acute lymphocytic leukaemia	rs148295641	chr18	32496370	T	G	0.01896	-0.5256	0.030965	1.277e-64	0.00826895	-0.352013	0.541285
B4GALT6	Acute lymphocytic leukaemia	rs17804730	chr18	32156054	A	C	0.46091	-0.0747	0.008327	2.937e-19	0.453314	-0.00822948	0.933095
B4GALT6	Acute lymphocytic leukaemia	rs1816633	chr18	31162268	A	T	0.3241	-0.0931	0.00894	2.144e-25	0.742233	-0.0279472	0.801056
B4GALT6	Acute lymphocytic leukaemia	rs189321311	chr18	27507461	A	C	0.0155	0.1989	0.033109	1.884e-09	0.0179148	-0.0327482	0.930727
B4GALT6	Acute lymphocytic leukaemia	rs2980858	chr8	125488935	C	T	0.31966	0.0571	0.0086	3.139e-11	0.73627	0.00479224	0.965403
B4GALT6	Acute lymphocytic leukaemia	rs4684847	chr3	12344838	T	C	0.11896	0.0828	0.012511	3.639e-11	0.169904	0.121661	0.340193
B4GALT6	Acute lymphocytic leukaemia	rs59477943	chr18	31556721	G	A	0.03496	-0.9248	0.017513	1e-200	0.0290307	-0.30723	0.293829
B4GALT6	Acute lymphocytic leukaemia	rs62621812	chr7	127375029	A	G	0.02528	0.1436	0.025381	1.534e-08	0.0422517	-0.327402	0.190222
B4GALT6	Acute lymphocytic leukaemia	rs78705678	chr10	17794281	G	A	0.36741	0.0484	0.00839	7.999e-09	0.384131	0.0325167	0.745717
B4GALT6	Acute lymphocytic leukaemia	rs78796387	chr18	31207671	T	G	0.03351	0.4779	0.022772	8.821e-98	0.0107017	0.93076	0.0450381
B4GALT6	Acute lymphocytic leukaemia	rs8102873	chr19	56977055	T	C	0.40098	-0.0473	0.008221	8.739e-09	0.47407	0.16634	0.087269
HHIP	Acute lymphocytic leukaemia	rs11727676	chr4	144737912	C	T	0.10368	0.2352	0.013296	5.054e-70	0.0853093	-0.0313585	0.857352
HHIP	Acute lymphocytic leukaemia	rs118146573	chr16	56967026	A	G	0.15106	-0.0741	0.011412	8.413e-11	0.107033	0.0750837	0.633218
HHIP	Acute lymphocytic leukaemia	rs718530	chr13	45989518	C	T	0.26042	0.0572	0.009325	8.55e-10	0.783476	-0.147089	0.215784
HHIP	Acute lymphocytic leukaemia	rs7438126	chr4	144302051	C	T	0.47588	-0.0554	0.008236	1.737e-11	0.561837	0.0228352	0.815898
HHIP	Acute lymphocytic leukaemia	rs77945941	chr2	219109023	C	G	0.09516	-0.1172	0.013954	4.511e-17	0.0888355	-0.182773	0.279902
HHIP	Acute lymphocytic leukaemia	rs78689694	chr11	126364925	C	G	0.10578	-0.079	0.01334	3.183e-09	0.143431	-0.0324629	0.81479
HHIP	Acute lymphocytic leukaemia	rs9274536	chr6	32666857	T	C	0.45423	-0.0611	0.008095	4.412e-14	0.521176	0.0534811	0.583417
A4GNT	Acute lymphocytic leukaemia	rs203687	chr1	196705140	T	C	0.4315	-0.0488	0.007897	6.438e-10	0.538146	-0.0196766	0.838674
A4GNT	Acute lymphocytic leukaemia	rs2073044	chr6	32371209	T	C	0.26489	0.0534	0.008889	1.885e-09	0.217318	0.158276	0.177852
A4GNT	Acute lymphocytic leukaemia	rs2251550	chr3	138140323	G	A	0.30063	-0.0651	0.008527	2.273e-14	0.642471	-0.100482	0.319402
A4GNT	Acute lymphocytic leukaemia	rs4974539	chr3	194341178	A	G	0.44289	0.1068	0.007888	9.105e-42	0.336321	-0.18647	0.0705667
GCNT4	Acute lymphocytic leukaemia	rs1355538	chr3	165787389	G	A	0.39847	-0.0751	0.008119	2.243e-20	0.672107	-0.150672	0.144439
GCNT4	Acute lymphocytic leukaemia	rs1555405	chr14	100710432	A	G	0.30381	-0.0479	0.008696	3.621e-08	0.352457	-0.11776	0.246289
GCNT4	Acute lymphocytic leukaemia	rs7774739	chr6	32041524	G	A	0.17585	0.0999	0.01111	2.423e-19	0.00283685	-0.0834957	0.932347
GCNT4	Acute lymphocytic leukaemia	rs9267139	chr6	31471721	A	G	0.10872	0.0783	0.012705	7.146e-10	0.182723	-0.161392	0.202138
SIGLEC15	Acute lymphocytic leukaemia	rs10305748	chr1	150812144	T	C	0.02964	-0.1359	0.023614	8.656e-09	0.0317018	-0.0310967	0.911753
SIGLEC15	Acute lymphocytic leukaemia	rs1047286	chr19	6713251	A	G	0.24066	-0.0566	0.009311	1.213e-09	0.174618	0.0768747	0.545999
SIGLEC15	Acute lymphocytic leukaemia	rs10922098	chr1	196695521	T	C	0.40011	-0.1836	0.00811	1.847e-113	0.561049	-0.00464965	0.961802
SIGLEC15	Acute lymphocytic leukaemia	rs1707652	chr3	165761011	T	C	0.3102	0.0963	0.008598	4.069e-29	0.248628	0.196937	0.0791043
SIGLEC15	Acute lymphocytic leukaemia	rs3130955	chr6	31086734	A	C	0.31795	0.0472	0.008586	3.863e-08	0.340702	0.107599	0.289434
BTNL3	Acute lymphocytic leukaemia	rs10922098	chr1	196695521	T	C	0.40011	-0.1291	0.008111	4.803e-57	0.561049	-0.00464965	0.961802
BTNL3	Acute lymphocytic leukaemia	rs3863087	chr3	165792099	A	G	0.09559	-0.0933	0.013752	1.164e-11	0.910319	-0.364013	0.0122752
BTNL3	Acute lymphocytic leukaemia	rs6445035	chr3	165762312	A	G	0.1904	0.1067	0.010105	4.599e-26	0.176283	0.234745	0.0632135
EBI3	Acute lymphocytic leukaemia	rs10937241	chr3	186104985	G	A	0.17923	-0.075	0.009479	2.529e-15	0.827578	-0.133427	0.299028
EBI3	Acute lymphocytic leukaemia	rs115770048	chr19	3340034	A	G	0.01222	-0.3589	0.039906	2.392e-19	0.00867138	0.0546718	0.916162
EBI3	Acute lymphocytic leukaemia	rs11594344	chr10	102251573	G	A	0.0234	-0.1366	0.023817	9.725e-09	0.0349249	0.143179	0.589061
EBI3	Acute lymphocytic leukaemia	rs11666444	chr19	2971049	C	T	0.02458	-0.1709	0.027159	3.124e-10	0.0106089	-0.0748672	0.878288
EBI3	Acute lymphocytic leukaemia	rs11711157	chr3	194341097	T	C	0.22978	-0.1131	0.008788	6.708e-38	0.350464	0.072481	0.478256
EBI3	Acute lymphocytic leukaemia	rs143771088	chr10	99251275	G	T	0.01647	-0.1717	0.028735	2.296e-09	0.0184981	0.020445	0.955108
EBI3	Acute lymphocytic leukaemia	rs3184504	chr12	111446804	C	T	0.37862	-0.0489	0.007585	1.143e-10	0.592237	0.00370426	0.970078
EBI3	Acute lymphocytic leukaemia	rs34328206	chr19	3905944	A	G	0.13386	-0.11	0.012716	5.139e-18	0.142865	0.0142401	0.919324
EBI3	Acute lymphocytic leukaemia	rs4807574	chr19	4286670	C	T	0.36163	0.2205	0.008901	1.716e-135	0.316429	0.173101	0.0987939
EBI3	Acute lymphocytic leukaemia	rs4807876	chr19	6532971	T	C	0.01286	-0.3879	0.03794	1.549e-24	0.0127118	0.297092	0.498791
EBI3	Acute lymphocytic leukaemia	rs56115403	chr17	7160579	A	G	0.21597	0.0689	0.00898	1.69e-14	0.282092	-0.166764	0.125683
EBI3	Acute lymphocytic leukaemia	rs5743618	chr4	38797027	A	C	0.34819	0.0813	0.007754	1.013e-25	0.153062	0.110308	0.41737
EBI3	Acute lymphocytic leukaemia	rs60103502	chr19	4609808	A	G	0.0985	-0.1218	0.014451	3.501e-17	0.133182	-0.149682	0.292418
EBI3	Acute lymphocytic leukaemia	rs61751507	chr10	100069757	T	C	0.04162	-0.3984	0.018308	5.466e-105	0.0387417	-0.466505	0.0664079
EBI3	Acute lymphocytic leukaemia	rs61872201	chr10	99891336	G	A	0.49756	-0.0789	0.007406	1.673e-26	0.432705	0.102751	0.295712
EBI3	Acute lymphocytic leukaemia	rs62165726	chr2	134208991	A	C	0.03053	-0.1811	0.021203	1.326e-17	0.0266337	-0.119639	0.690898
EBI3	Acute lymphocytic leukaemia	rs704	chr17	28367840	A	G	0.49189	-0.1078	0.007344	8.876e-49	0.419906	-0.192181	0.050501
EBI3	Acute lymphocytic leukaemia	rs7255715	chr19	4511128	G	C	0.45969	-0.1507	0.008626	2.448e-68	0.577399	-0.0551742	0.576677
EBI3	Acute lymphocytic leukaemia	rs8108746	chr19	4196009	A	G	0.43089	0.351	0.00557	1e-200	0.556151	0.00711841	0.941917
EBI3	Acute lymphocytic leukaemia	rs9807813	chr19	4232418	T	C	0.05002	-0.9235	0.012305	1e-200	0.035187	-0.21536	0.413994
HNRNPDL	Acute lymphocytic leukaemia	rs1354034	chr3	56815721	C	T	0.38119	0.0909	0.008194	1.347e-28	0.704977	-0.125325	0.242803
HNRNPDL	Acute lymphocytic leukaemia	rs342200	chr7	106676033	A	G	0.42559	-0.0442	0.008028	3.674e-08	0.928885	-0.0350435	0.853556
HNRNPDL	Acute lymphocytic leukaemia	rs4980320	chr11	198986	C	T	0.46986	0.0471	0.007995	3.833e-09	0.479149	0.0357157	0.716015
HNRNPDL	Acute lymphocytic leukaemia	rs6897795	chr5	178179418	A	G	0.10004	-0.0912	0.013205	4.963e-12	0.160543	0.0437159	0.739224
FAM163B	Acute lymphocytic leukaemia	rs10904861	chr10	16988776	T	C	0.37165	-0.0583	0.008213	1.26e-12	0.384935	-0.0448816	0.654906
FAM163B	Acute lymphocytic leukaemia	rs1797077	chr10	16811253	T	C	0.47532	-0.2344	0.007884	2.946e-194	0.557909	-0.0276692	0.777891
FAM163B	Acute lymphocytic leukaemia	rs61751507	chr10	100069757	T	C	0.04162	0.3289	0.019833	9.235e-62	0.0387417	-0.466505	0.0664079
FAM163B	Acute lymphocytic leukaemia	rs61872201	chr10	99891336	G	A	0.49756	0.0562	0.008014	2.342e-12	0.432705	0.102751	0.295712
FAM163B	Acute lymphocytic leukaemia	rs704	chr17	28367840	A	G	0.49189	0.0551	0.007961	4.483e-12	0.419906	-0.192181	0.050501
FAM163B	Acute lymphocytic leukaemia	rs7634194	chr3	194343888	C	T	0.34569	0.0476	0.008422	1.587e-08	0.294288	-0.158495	0.139728
DSC1	Acute lymphocytic leukaemia	rs10922098	chr1	196695521	T	C	0.40011	-0.1368	0.008146	2.705e-63	0.561049	-0.00464965	0.961802
DSC1	Acute lymphocytic leukaemia	rs1555405	chr14	100710432	A	G	0.30381	-0.0485	0.008729	2.756e-08	0.352457	-0.11776	0.246289
DSC1	Acute lymphocytic leukaemia	rs1706435	chr3	165743688	G	A	0.36981	0.0691	0.008263	6.115e-17	0.311721	0.153164	0.141768
DSC1	Acute lymphocytic leukaemia	rs35426875	chr6	32632358	C	T	0.29339	0.0569	0.0087	6.153e-11	0.328915	-0.0342498	0.742051
DSC1	Acute lymphocytic leukaemia	rs453821	chr6	31967534	T	C	0.13894	0.1081	0.011509	5.859e-21	0.0767268	0.0746322	0.686005
DSC1	Acute lymphocytic leukaemia	rs704	chr17	28367840	A	G	0.49189	-0.0691	0.008008	6.167e-18	0.419906	-0.192181	0.050501
DSC1	Acute lymphocytic leukaemia	rs872914	chr4	73852384	A	G	0.28935	-0.0957	0.008781	1.179e-27	0.708329	0.0629627	0.55279
C6orf89	Acute lymphocytic leukaemia	rs1059216	chr14	105855558	T	C	0.04593	-0.3737	0.019343	3.662e-83	0.961247	-0.182798	0.494708
C6orf89	Acute lymphocytic leukaemia	rs10922098	chr1	196695521	T	C	0.40011	-0.0755	0.008085	9.764e-21	0.561049	-0.00464965	0.961802
C6orf89	Acute lymphocytic leukaemia	rs117051919	chr16	72487217	C	T	0.01969	0.182	0.028733	2.386e-10	0.00504775	-0.0247672	0.972298
C6orf89	Acute lymphocytic leukaemia	rs1355538	chr3	165787389	G	A	0.39847	-0.0592	0.008067	2.164e-13	0.672107	-0.150672	0.144439
C6orf89	Acute lymphocytic leukaemia	rs2857383	chr14	105866369	G	C	0.45762	-0.0467	0.00815	1.002e-08	0.457514	-0.039785	0.702289
C6orf89	Acute lymphocytic leukaemia	rs812426	chr10	16815134	G	C	0.47382	0.0706	0.0079	4.011e-19	0.564608	-0.00778065	0.936796
MRAP2	Acute lymphocytic leukaemia	rs17580	chr14	94380925	A	T	0.03316	0.1446	0.022603	1.582e-10	0.00915828	-0.00435212	0.993104
MRAP2	Acute lymphocytic leukaemia	rs185009887	chr17	5848332	A	G	0.02519	-0.1469	0.026071	1.754e-08	0.00967934	0.706444	0.160631
MRAP2	Acute lymphocytic leukaemia	rs6993770	chr8	105569300	T	A	0.22448	-0.058	0.009655	1.884e-09	0.223119	0.0374289	0.74915
MRAP2	Acute lymphocytic leukaemia	rs8099840	chr19	15470214	C	A	0.3775	-0.0528	0.008268	1.706e-10	0.393163	-0.127866	0.198391
OSMR	Acute lymphocytic leukaemia	rs10922098	chr1	196695521	T	C	0.40011	-0.1054	0.008138	2.32e-38	0.561049	-0.00464965	0.961802
OSMR	Acute lymphocytic leukaemia	rs2106009	chr14	106135717	A	C	0.42058	-0.0648	0.008205	2.841e-15	0.580724	-0.0229293	0.820985
OSMR	Acute lymphocytic leukaemia	rs697356	chr3	165718150	C	G	0.36502	0.0518	0.008271	3.777e-10	0.322253	0.135682	0.190749
OSMR	Acute lymphocytic leukaemia	rs77326070	chr5	39039653	G	A	0.34489	0.1159	0.00841	3.292e-43	0.645698	0.0398199	0.694306
OSMR	Acute lymphocytic leukaemia	rs7774739	chr6	32041524	G	A	0.17585	0.0682	0.011121	8.663e-10	0.00283685	-0.0834957	0.932347
STMN2	Acute lymphocytic leukaemia	rs1354034	chr3	56815721	C	T	0.38119	0.1087	0.00824	9.693e-40	0.704977	-0.125325	0.242803
STMN2	Acute lymphocytic leukaemia	rs4759076	chr12	54336088	C	T	0.4756	0.0835	0.008041	2.929e-25	0.582206	0.0627663	0.52415
STMN2	Acute lymphocytic leukaemia	rs6436128	chr2	219264316	T	C	0.10496	-0.0993	0.013176	4.826e-14	0.957655	0.45522	0.0637133
STMN2	Acute lymphocytic leukaemia	rs72882960	chr11	268927	T	C	0.26571	0.0545	0.009057	1.772e-09	0.357218	-0.138643	0.174117
ASPRV1	Acute lymphocytic leukaemia	rs117562643	chr16	29302062	A	G	0.04896	-0.1085	0.018793	7.763e-09	0.0393392	0.461362	0.0661714
ASPRV1	Acute lymphocytic leukaemia	rs117749902	chr19	37098031	T	C	0.02221	-0.1799	0.02786	1.066e-10	0.0322083	-0.03102	0.911332
ASPRV1	Acute lymphocytic leukaemia	rs12610606	chr19	38275182	C	T	0.16027	-0.173	0.010952	3.316e-56	0.211652	-0.117344	0.327197
ASPRV1	Acute lymphocytic leukaemia	rs140510457	chr16	52731698	A	G	0.01332	-0.2177	0.035074	5.402e-10	0.0156262	0.317487	0.426744
ASPRV1	Acute lymphocytic leukaemia	rs17658212	chr15	40853721	T	C	0.04753	-0.2123	0.018986	5.007e-29	0.0259483	0.32473	0.300714
ASPRV1	Acute lymphocytic leukaemia	rs188486759	chr7	77084576	T	C	0.01064	0.2208	0.039719	2.713e-08	0.0409558	-0.129748	0.597188
ASPRV1	Acute lymphocytic leukaemia	rs224313	chr10	62857180	C	T	0.33212	0.0559	0.008574	7.057e-11	0.325474	-0.0328332	0.752426
ASPRV1	Acute lymphocytic leukaemia	rs2702945	chr8	6877165	C	T	0.25043	-0.0648	0.009267	2.694e-12	0.773526	0.201013	0.0852315
ASPRV1	Acute lymphocytic leukaemia	rs72802919	chr16	34028295	A	G	0.02486	-0.2806	0.025582	5.406e-28	0.00964346	-0.00703022	0.988965
ASPRV1	Acute lymphocytic leukaemia	rs74446154	chr16	49590636	A	G	0.03057	-0.1557	0.02347	3.267e-11	0.0502327	-0.14261	0.520354
ASPRV1	Acute lymphocytic leukaemia	rs7545538	chr1	209806268	G	C	0.4555	0.0454	0.00807	1.848e-08	0.467262	-0.0576599	0.554064
ASPRV1	Acute lymphocytic leukaemia	rs9845881	chr3	190311493	C	T	0.39013	0.0599	0.008258	4.051e-13	0.578539	-0.0570886	0.562761
STX8	Acute lymphocytic leukaemia	rs11078801	chr17	9433928	C	G	0.21153	0.0681	0.009708	2.307e-12	0.215243	-0.00788858	0.946892
STX8	Acute lymphocytic leukaemia	rs12292693	chr11	65169248	C	A	0.26371	-0.0868	0.008984	4.396e-22	0.239884	-0.0242515	0.832688
STX8	Acute lymphocytic leukaemia	rs1354034	chr3	56815721	C	T	0.38119	0.0501	0.00815	7.876e-10	0.704977	-0.125325	0.242803
STX8	Acute lymphocytic leukaemia	rs741735	chr11	256976	A	C	0.26384	0.0489	0.008955	4.742e-08	0.35687	-0.134755	0.186603
NTM	Acute lymphocytic leukaemia	rs12289924	chr11	131440207	G	T	0.29749	0.1038	0.009304	6.628e-29	0.268561	-0.154867	0.161886
NTM	Acute lymphocytic leukaemia	rs1260326	chr2	27508073	C	T	0.34132	0.0994	0.008823	1.945e-29	0.650149	0.116298	0.253911
NTM	Acute lymphocytic leukaemia	rs12800878	chr11	131246794	A	G	0.38371	0.1964	0.008718	2.142e-112	0.649644	-0.150114	0.143701
NTM	Acute lymphocytic leukaemia	rs138580446	chr11	132379412	A	C	0.05273	-0.1257	0.019019	3.866e-11	0.0113424	-0.586571	0.215899
NTM	Acute lymphocytic leukaemia	rs2477642	chr10	17821038	C	T	0.43852	0.1175	0.008429	3.632e-44	0.523399	0.0176869	0.856341
NTM	Acute lymphocytic leukaemia	rs2477669	chr10	17764505	A	G	0.17746	-0.0808	0.010975	1.805e-13	0.794973	-0.168942	0.169287
NTM	Acute lymphocytic leukaemia	rs2511504	chr11	131326501	C	T	0.40641	0.3616	0.006654	1e-200	0.370155	0.0800434	0.427758
NTM	Acute lymphocytic leukaemia	rs2686401	chr3	165771077	C	T	0.31011	-0.0793	0.008995	1.187e-18	0.75359	-0.197297	0.0795353
NTM	Acute lymphocytic leukaemia	rs4592429	chr11	130818963	G	T	0.37755	-0.0515	0.008777	4.42e-09	0.431719	0.107559	0.273933
NTM	Acute lymphocytic leukaemia	rs540	chr16	370907	C	T	0.38131	-0.05	0.008583	5.691e-09	0.57272	0.0585022	0.550923
NTM	Acute lymphocytic leukaemia	rs7118465	chr11	132100419	T	C	0.29159	-0.1376	0.009354	5.59e-49	0.667473	0.10978	0.285117
NTM	Acute lymphocytic leukaemia	rs78705678	chr10	17794281	G	A	0.36741	0.1237	0.008683	4.762e-46	0.384131	0.0325167	0.745717
GALNT13	Acute lymphocytic leukaemia	rs10922098	chr1	196695521	T	C	0.40011	-0.0612	0.008245	1.146e-13	0.561049	-0.00464965	0.961802
GALNT13	Acute lymphocytic leukaemia	rs12975366	chr19	54255498	C	T	0.4155	-0.061	0.008196	9.857e-14	0.371137	0.170791	0.0899146
GALNT13	Acute lymphocytic leukaemia	rs16834610	chr2	153873982	T	C	0.04952	0.1275	0.018824	1.258e-11	0.0319661	-0.00970022	0.972551
GALNT13	Acute lymphocytic leukaemia	rs2477642	chr10	17821038	C	T	0.43852	0.0488	0.008157	2.193e-09	0.523399	0.0176869	0.856341
PLA2R1	Acute lymphocytic leukaemia	rs112083943	chr2	158484342	T	C	0.02821	-0.2625	0.022439	1.301e-31	0.01853	-0.251107	0.487304
PLA2R1	Acute lymphocytic leukaemia	rs113098364	chr2	159467547	C	T	0.11335	-0.3723	0.012031	1e-200	0.147887	-0.0550949	0.691729
PLA2R1	Acute lymphocytic leukaemia	rs114994001	chr2	155796156	A	G	0.08437	0.0825	0.013936	3.218e-09	0.0431139	-0.100453	0.68113
PLA2R1	Acute lymphocytic leukaemia	rs115087160	chr2	162977586	T	C	0.06758	-0.1306	0.015428	2.556e-17	0.0249937	-0.46698	0.126576
PLA2R1	Acute lymphocytic leukaemia	rs116241488	chr2	158024333	A	C	0.01133	0.2867	0.036404	3.393e-15	0.00247152	-0.813934	0.420514
PLA2R1	Acute lymphocytic leukaemia	rs11751347	chr6	160671406	T	C	0.07953	-0.0998	0.012532	1.669e-15	0.0860792	0.0106802	0.951111
PLA2R1	Acute lymphocytic leukaemia	rs12471193	chr2	154739625	G	A	0.37329	-0.0679	0.007881	6.94e-18	0.394449	-0.171226	0.0853277
PLA2R1	Acute lymphocytic leukaemia	rs12471260	chr2	159466945	A	G	0.41345	-0.2456	0.007708	1e-200	0.548738	-0.0686403	0.488614
PLA2R1	Acute lymphocytic leukaemia	rs12998722	chr2	147446275	T	C	0.17804	-0.0582	0.010007	6.023e-09	0.775553	0.0226322	0.845535
PLA2R1	Acute lymphocytic leukaemia	rs13001774	chr2	160914123	G	A	0.11273	0.2456	0.01218	1.993e-90	0.144021	-0.112354	0.417412
PLA2R1	Acute lymphocytic leukaemia	rs1377057	chr4	81303402	C	G	0.28819	0.0501	0.007554	3.299e-11	0.242934	0.0125827	0.91148
PLA2R1	Acute lymphocytic leukaemia	rs2000242	chr9	123211058	T	C	0.16633	0.0521	0.009157	1.274e-08	0.162817	0.0390211	0.767941
PLA2R1	Acute lymphocytic leukaemia	rs2091151	chr2	148411388	G	A	0.48486	-0.0427	0.007683	2.734e-08	0.491937	-0.0587991	0.544234
PLA2R1	Acute lymphocytic leukaemia	rs3798938	chr6	161230971	C	T	0.0418	-0.1069	0.017307	6.54e-10	0.0645274	-0.247709	0.212742
PLA2R1	Acute lymphocytic leukaemia	rs61656332	chr2	172154420	G	C	0.21309	-0.0674	0.009349	5.635e-13	0.264859	0.0904839	0.415628
PLA2R1	Acute lymphocytic leukaemia	rs62194171	chr2	161012157	T	G	0.381	-0.069	0.007904	2.549e-18	0.354419	-0.139683	0.167571
PLA2R1	Acute lymphocytic leukaemia	rs6430066	chr2	144747220	C	T	0.39954	-0.045	0.007782	7.342e-09	0.400156	-0.0365709	0.712975
PLA2R1	Acute lymphocytic leukaemia	rs6496748	chr15	91003706	G	A	0.36687	0.0402	0.007065	1.269e-08	0.417555	0.194874	0.0482014
PLA2R1	Acute lymphocytic leukaemia	rs6747805	chr2	163444080	C	T	0.24362	-0.0671	0.008913	5.156e-14	0.267795	0.0110592	0.919954
PLA2R1	Acute lymphocytic leukaemia	rs757344	chr12	47812313	C	T	0.41461	-0.039	0.006889	1.502e-08	0.462247	0.154714	0.113484
PLA2R1	Acute lymphocytic leukaemia	rs77298446	chr2	171218825	G	C	0.02137	-0.1494	0.026472	1.664e-08	0.00660963	-0.591403	0.314905
PLA2R1	Acute lymphocytic leukaemia	rs78489768	chr2	162254424	G	A	0.03036	0.2335	0.02213	5.011e-26	0.0302036	0.00747124	0.979145
PLA2R1	Acute lymphocytic leukaemia	rs80024373	chr2	165833367	T	A	0.01009	-0.3563	0.038289	1.333e-20	0.0347601	-0.0520888	0.846787
PLA2R1	Acute lymphocytic leukaemia	rs80339456	chr2	160310243	T	A	0.02575	0.4787	0.024363	5.979e-86	0.020904	-0.0755518	0.823855
CYB5D2	Acute lymphocytic leukaemia	rs1042445	chr3	186677647	T	C	0.23639	0.0631	0.009261	9.508e-12	0.279767	-0.179978	0.0962875
CYB5D2	Acute lymphocytic leukaemia	rs10922098	chr1	196695521	T	C	0.40011	-0.0507	0.008069	3.309e-10	0.561049	-0.00464965	0.961802
CYB5D2	Acute lymphocytic leukaemia	rs149208504	chr17	4011662	C	T	0.02263	-0.6911	0.025794	3.92e-158	0.0265529	0.271495	0.376841
CYB5D2	Acute lymphocytic leukaemia	rs17176065	chr17	4058560	T	C	0.0447	0.3578	0.018882	4.497e-80	0.0536351	-0.221158	0.308501
CYB5D2	Acute lymphocytic leukaemia	rs2523483	chr6	31386015	G	T	0.04792	0.1074	0.018723	9.687e-09	0.0117129	-0.416448	0.353851
CYB5D2	Acute lymphocytic leukaemia	rs41285751	chr6	31932038	T	G	0.08277	0.1034	0.014374	6.315e-13	0.0244414	0.0813856	0.84429
CYB5D2	Acute lymphocytic leukaemia	rs7224464	chr17	4449244	T	C	0.29	-0.0531	0.00876	1.348e-09	0.738598	-0.214009	0.0528689
CALN1	Acute lymphocytic leukaemia	rs10922098	chr1	196695521	T	C	0.40011	-0.1587	0.008097	1.543e-85	0.561049	-0.00464965	0.961802
CALN1	Acute lymphocytic leukaemia	rs11569415	chr19	6716268	A	G	0.24276	-0.0517	0.00924	2.206e-08	0.185009	0.117832	0.344104
CALN1	Acute lymphocytic leukaemia	rs1355538	chr3	165787389	G	A	0.39847	-0.0698	0.008103	7.064e-18	0.672107	-0.150672	0.144439
CALN1	Acute lymphocytic leukaemia	rs453821	chr6	31967534	T	C	0.13894	0.1242	0.011453	2.131e-27	0.0767268	0.0746322	0.686005
CD58	Acute lymphocytic leukaemia	rs116614403	chr1	118591986	T	C	0.01638	0.2215	0.031178	1.209e-12	0.00723576	-0.382089	0.499234
CD58	Acute lymphocytic leukaemia	rs1706435	chr3	165743688	G	A	0.36981	0.0744	0.00824	1.735e-19	0.311721	0.153164	0.141768
CD58	Acute lymphocytic leukaemia	rs61789227	chr1	116537006	G	A	0.02109	0.6656	0.027448	6.699e-130	0.0328133	-0.232134	0.391296
PLEKHA4	Acute lymphocytic leukaemia	rs10922098	chr1	196695521	T	C	0.40011	-0.0974	0.008103	2.784e-33	0.561049	-0.00464965	0.961802
PLEKHA4	Acute lymphocytic leukaemia	rs113747960	chr12	7074644	A	G	0.12384	-0.0669	0.012249	4.722e-08	0.178078	-0.0680726	0.589736
PLEKHA4	Acute lymphocytic leukaemia	rs17580	chr14	94380925	A	T	0.03316	0.2796	0.022322	5.415e-36	0.00915828	-0.00435212	0.993104
PLEKHA4	Acute lymphocytic leukaemia	rs2686395	chr3	165767231	C	T	0.3101	-0.0699	0.008557	3.106e-16	0.75359	-0.197297	0.0795353
SRL	Acute lymphocytic leukaemia	rs11640587	chr16	4214222	G	C	0.38098	-0.1185	0.00833	6.331e-46	0.570518	-0.10789	0.274087
SRL	Acute lymphocytic leukaemia	rs13208583	chr6	32833094	T	C	0.10406	0.0795	0.013354	2.625e-09	0.0647151	0.101543	0.608918
SRL	Acute lymphocytic leukaemia	rs1355538	chr3	165787389	G	A	0.39847	-0.046	0.00831	3.109e-08	0.672107	-0.150672	0.144439
SRL	Acute lymphocytic leukaemia	rs2736921	chr10	122498813	G	A	0.11535	0.1399	0.012884	1.815e-27	0.903647	-0.133919	0.410986
SRL	Acute lymphocytic leukaemia	rs7915908	chr10	122339332	T	C	0.29712	-0.0672	0.008964	6.549e-14	0.26731	0.254006	0.0220501
SRL	Acute lymphocytic leukaemia	rs932274	chr10	122465848	T	C	0.2278	-0.2055	0.009721	3.355e-99	0.211856	0.0242435	0.838507
STX6	Acute lymphocytic leukaemia	rs1706435	chr3	165743688	G	A	0.36981	0.0658	0.008266	1.712e-15	0.311721	0.153164	0.141768
STX6	Acute lymphocytic leukaemia	rs572515	chr1	196677131	G	A	0.3973	-0.1153	0.008157	2.281e-45	0.561231	-0.00508186	0.95827
STX6	Acute lymphocytic leukaemia	rs7774739	chr6	32041524	G	A	0.17585	0.0645	0.01114	7.033e-09	0.00283685	-0.0834957	0.932347
PLD3	Acute lymphocytic leukaemia	rs10922098	chr1	196695521	T	C	0.40011	-0.0554	0.008121	9.001e-12	0.561049	-0.00464965	0.961802
PLD3	Acute lymphocytic leukaemia	rs11738994	chr5	151429528	C	T	0.36196	0.0599	0.008268	4.343e-13	0.651545	-0.209431	0.0408413
PLD3	Acute lymphocytic leukaemia	rs4631423	chr8	11841770	T	C	0.20582	-0.0564	0.009882	1.149e-08	0.200515	0.207238	0.0899601
PLD3	Acute lymphocytic leukaemia	rs6993770	chr8	105569300	T	A	0.22448	-0.0664	0.009545	3.488e-12	0.223119	0.0374289	0.74915
PLD3	Acute lymphocytic leukaemia	rs7254808	chr19	40364607	C	T	0.04313	0.1354	0.019646	5.496e-12	0.974715	0.3637	0.23468
CLEC2A	Acute lymphocytic leukaemia	rs10922098	chr1	196695521	T	C	0.40011	-0.055	0.008144	1.445e-11	0.561049	-0.00464965	0.961802
CLEC2A	Acute lymphocytic leukaemia	rs11196979	chr10	114904626	G	A	0.11452	-0.0745	0.01257	3.091e-09	0.141725	0.0115945	0.934308
CLEC2A	Acute lymphocytic leukaemia	rs485305	chr10	114288286	A	C	0.02166	-0.1994	0.026955	1.389e-13	0.0221292	-0.443168	0.174125
CLEC2A	Acute lymphocytic leukaemia	rs7080536	chr10	113588287	A	G	0.04142	-0.6371	0.019699	1e-200	0.027439	0.040609	0.892481
CLEC2A	Acute lymphocytic leukaemia	rs7774739	chr6	32041524	G	A	0.17585	0.0705	0.011118	2.284e-10	0.00283685	-0.0834957	0.932347
CLEC2A	Acute lymphocytic leukaemia	rs77774564	chr10	113637445	A	G	0.01388	-0.3431	0.033605	1.79e-24	0.00718308	1.27625	0.0258422
CLEC10A	Acute lymphocytic leukaemia	rs10922098	chr1	196695521	T	C	0.40011	-0.0997	0.008099	7.99e-35	0.561049	-0.00464965	0.961802
CLEC10A	Acute lymphocytic leukaemia	rs1706435	chr3	165743688	G	A	0.36981	0.0602	0.008211	2.272e-13	0.311721	0.153164	0.141768
CLEC10A	Acute lymphocytic leukaemia	rs2844452	chr6	31914247	G	A	0.43878	-0.0669	0.007965	4.505e-17	0.376844	-0.0357263	0.7226
CLEC10A	Acute lymphocytic leukaemia	rs550671	chr6	31976816	T	C	0.14045	0.13	0.011386	3.416e-30	0.0767293	0.074595	0.686148
BET1L	Acute lymphocytic leukaemia	rs10922098	chr1	196695521	T	C	0.40011	-0.089	0.008053	2.15e-28	0.561049	-0.00464965	0.961802
BET1L	Acute lymphocytic leukaemia	rs1619994	chr3	165744047	G	A	0.2807	0.0486	0.008788	3.198e-08	0.253862	0.203883	0.0647739
BET1L	Acute lymphocytic leukaemia	rs444921	chr6	31964400	T	C	0.13897	0.0843	0.011376	1.258e-13	0.0767023	0.074568	0.686358
BET1L	Acute lymphocytic leukaemia	rs4734879	chr8	105570896	G	A	0.21866	-0.0525	0.009586	4.333e-08	0.220739	0.051316	0.662159
SPINK7	Acute lymphocytic leukaemia	rs1355538	chr3	165787389	G	A	0.39847	-0.0537	0.0084	1.626e-10	0.672107	-0.150672	0.144439
SPINK7	Acute lymphocytic leukaemia	rs2727270	chr11	61835765	T	C	0.16553	-0.0619	0.011104	2.481e-08	0.270133	0.0703227	0.520022
SPINK7	Acute lymphocytic leukaemia	rs322372	chr5	172749458	G	A	0.05848	-0.1007	0.017618	1.092e-08	0.943873	0.0437082	0.836051
SPINK7	Acute lymphocytic leukaemia	rs34155263	chr2	72036095	T	C	0.4112	-0.0464	0.008427	3.663e-08	0.415308	-0.0677951	0.491427
SPINK7	Acute lymphocytic leukaemia	rs453821	chr6	31967534	T	C	0.13894	0.0678	0.011868	1.111e-08	0.0767268	0.0746322	0.686005
SPINK7	Acute lymphocytic leukaemia	rs61816766	chr1	152347096	C	T	0.01942	0.1718	0.030331	1.478e-08	0.00767557	-0.716558	0.202176
SPINK7	Acute lymphocytic leukaemia	rs77924615	chr16	20381010	A	G	0.19701	-0.0717	0.010423	6.037e-12	0.222995	-0.17512	0.131146
SPINK7	Acute lymphocytic leukaemia	rs9784645	chr5	148337418	T	G	0.25293	0.1322	0.009459	2.184e-44	0.274958	0.0890352	0.413313
UCMA	Acute lymphocytic leukaemia	rs10906474	chr10	13779194	G	A	0.01959	-0.3123	0.029458	2.935e-26	0.960812	-0.290439	0.2394
UCMA	Acute lymphocytic leukaemia	rs112582999	chr10	13246282	A	T	0.04771	0.1122	0.01888	2.801e-09	0.0795304	-0.462339	0.0107053
UCMA	Acute lymphocytic leukaemia	rs117415981	chr10	13662315	A	G	0.02671	-0.1538	0.025914	2.937e-09	0.0176707	0.300082	0.415759
UCMA	Acute lymphocytic leukaemia	rs138834887	chr10	13221289	A	C	0.0233	0.5018	0.027374	4.639e-75	0.00272667	-0.164095	0.861635
UCMA	Acute lymphocytic leukaemia	rs142421037	chr10	13219514	C	G	0.01343	0.2001	0.035005	1.088e-08	0.0168942	-0.48236	0.200405
UCMA	Acute lymphocytic leukaemia	rs185705950	chr10	13133960	T	C	0.05008	-0.2434	0.018855	4.014e-38	0.0175626	-0.195565	0.597873
UCMA	Acute lymphocytic leukaemia	rs2399954	chr10	13234368	A	G	0.08795	-0.4568	0.014455	1e-200	0.0356618	-0.047804	0.85738
UCMA	Acute lymphocytic leukaemia	rs4755234	chr11	44210885	C	T	0.32319	0.0529	0.008695	1.171e-09	0.641556	-0.0663192	0.513525
UCMA	Acute lymphocytic leukaemia	rs6485513	chr11	44348590	T	C	0.40879	-0.0475	0.008308	1.08e-08	0.519582	-0.0410023	0.672592
UCMA	Acute lymphocytic leukaemia	rs78560997	chr10	13288194	C	T	0.03949	0.1808	0.021303	2.116e-17	0.00605302	-0.175196	0.788976
UCMA	Acute lymphocytic leukaemia	rs7952436	chr11	67257063	T	C	0.08078	-0.1028	0.014831	4.163e-12	0.0524494	-0.149988	0.487426
UCMA	Acute lymphocytic leukaemia	rs7971039	chr12	85330527	A	G	0.32997	0.0689	0.008685	2.128e-15	0.263526	0.101804	0.356489
LRRK2	Acute lymphocytic leukaemia	rs12478841	chr2	27588855	G	A	0.21569	0.0648	0.009677	2.133e-11	0.279299	-0.0775535	0.474464
LRRK2	Acute lymphocytic leukaemia	rs1291921	chr3	136317384	G	A	0.2763	0.0503	0.009015	2.414e-08	0.830958	0.0110807	0.93174
LRRK2	Acute lymphocytic leukaemia	rs34927613	chr6	32632434	A	G	0.29339	0.0681	0.008754	7.302e-15	0.32891	-0.0342339	0.742169
LRRK2	Acute lymphocytic leukaemia	rs3863087	chr3	165792099	A	G	0.09559	-0.0998	0.01389	6.708e-13	0.910319	-0.364013	0.0122752
LRRK2	Acute lymphocytic leukaemia	rs550671	chr6	31976816	T	C	0.14045	0.1134	0.011544	8.909e-23	0.0767293	0.074595	0.686148
LRRK2	Acute lymphocytic leukaemia	rs6445035	chr3	165762312	A	G	0.1904	0.1146	0.010209	3.061e-29	0.176283	0.234745	0.0632135
LRRK2	Acute lymphocytic leukaemia	rs704	chr17	28367840	A	G	0.49189	0.0964	0.008036	3.727e-33	0.419906	-0.192181	0.050501
LRRK2	Acute lymphocytic leukaemia	rs71352239	chr19	44926286	T	C	0.30263	0.0596	0.008768	1.067e-11	0.304617	-0.0359426	0.738919
LRRK2	Acute lymphocytic leukaemia	rs964184	chr11	116778201	C	G	0.12321	-0.1015	0.012161	7.031e-17	0.855465	0.186323	0.176306
IL5	Acute lymphocytic leukaemia	rs11755689	chr6	32618599	G	A	0.33707	0.0442	0.007926	2.451e-08	0.388132	-0.0621902	0.539673
IL5	Acute lymphocytic leukaemia	rs1846190	chr6	32616036	A	G	0.35085	0.0532	0.008064	4.184e-11	0.284371	0.0323767	0.763887
IL5	Acute lymphocytic leukaemia	rs572515	chr1	196677131	G	A	0.3973	-0.0575	0.007932	4.188e-13	0.561231	-0.00508186	0.95827
N6AMT1	Acute lymphocytic leukaemia	rs17784482	chr15	71140089	G	A	0.01181	-0.2289	0.03679	4.917e-10	0.00263774	-1.01658	0.261516
N6AMT1	Acute lymphocytic leukaemia	rs4541868	chr8	105578477	A	C	0.21915	-0.0677	0.009725	3.372e-12	0.226219	0.0504831	0.664613
N6AMT1	Acute lymphocytic leukaemia	rs4980320	chr11	198986	C	T	0.46986	0.0461	0.008064	1.086e-08	0.479149	0.0357157	0.716015
PDXK	Acute lymphocytic leukaemia	rs10057588	chr5	43160065	A	G	0.35423	0.0617	0.008409	2.18e-13	0.570294	-0.0723899	0.460917
PDXK	Acute lymphocytic leukaemia	rs144059351	chr21	44048700	A	G	0.06601	-0.1033	0.016092	1.368e-10	0.04775	-0.0666378	0.768955
PDXK	Acute lymphocytic leukaemia	rs4818855	chr21	43619070	T	C	0.41893	-0.1278	0.008111	6.136e-56	0.644964	-0.0241107	0.812592
PDXK	Acute lymphocytic leukaemia	rs55704290	chr21	43846145	T	C	0.03483	-0.1207	0.022037	4.322e-08	0.00923575	-0.811552	0.0906943
PDXK	Acute lymphocytic leukaemia	rs75136590	chr21	43859644	A	G	0.04352	0.1215	0.019886	9.974e-10	0.0472515	-0.191064	0.399721
PDXK	Acute lymphocytic leukaemia	rs79039769	chr21	44038088	A	G	0.01537	-0.2996	0.032805	6.674e-20	0.00597889	0.377409	0.563926
REG4	Acute lymphocytic leukaemia	rs10500661	chr11	6252514	C	T	0.22999	0.0544	0.009844	3.276e-08	0.200373	0.0293953	0.810648
REG4	Acute lymphocytic leukaemia	rs12125319	chr1	119108785	C	T	0.02414	0.1599	0.027012	3.228e-09	0.0071184	-0.0294115	0.959265
REG4	Acute lymphocytic leukaemia	rs191615076	chr1	120386170	A	C	0.03429	0.1979	0.022775	3.648e-18	0.0405818	0.146191	0.559497
REG4	Acute lymphocytic leukaemia	rs2979153	chr8	8399571	C	G	0.23178	-0.0551	0.009786	1.799e-08	0.81897	-0.217088	0.0839847
REG4	Acute lymphocytic leukaemia	rs3009182	chr1	119836055	T	C	0.22116	-0.1428	0.00999	2.376e-46	0.815926	-0.220876	0.0782781
REG4	Acute lymphocytic leukaemia	rs3217810	chr12	4279105	T	C	0.13867	0.0823	0.011913	4.908e-12	0.152535	-0.0333922	0.804863
REG4	Acute lymphocytic leukaemia	rs72697218	chr1	119853675	T	C	0.02416	-0.2246	0.02673	4.37e-17	0.0373067	0.0830998	0.747839
REG4	Acute lymphocytic leukaemia	rs731541	chr17	9895845	C	A	0.3283	0.0513	0.00886	7.026e-09	0.286285	0.110654	0.304102
REG4	Acute lymphocytic leukaemia	rs7480143	chr11	2203793	T	C	0.11386	0.0953	0.0131	3.47e-13	0.128272	-0.0753298	0.608641
REG4	Acute lymphocytic leukaemia	rs80117153	chr1	119305017	C	G	0.02641	0.1488	0.025951	9.818e-09	0.032994	0.146524	0.593084
HSPB1	Acute lymphocytic leukaemia	rs10231308	chr7	76376379	C	T	0.23473	0.1249	0.009638	2.101e-38	0.202114	-0.170876	0.155568
HSPB1	Acute lymphocytic leukaemia	rs113088829	chr7	75667928	C	T	0.05337	-0.1281	0.017664	4.105e-13	0.105574	0.0691208	0.658497
HSPB1	Acute lymphocytic leukaemia	rs117296956	chr7	77220299	A	G	0.02756	-0.2958	0.024674	4.086e-33	0.00489232	-0.564299	0.420939
HSPB1	Acute lymphocytic leukaemia	rs13240755	chr7	75976791	A	G	0.34276	0.2916	0.008488	1e-200	0.728892	0.0153119	0.889356
HSPB1	Acute lymphocytic leukaemia	rs34179550	chr7	75615065	A	G	0.11116	0.0766	0.013176	6.11e-09	0.0830171	-0.159918	0.366657
HSPB1	Acute lymphocytic leukaemia	rs342200	chr7	106676033	A	G	0.42559	-0.0577	0.008248	2.639e-12	0.928885	-0.0350435	0.853556
HSPB1	Acute lymphocytic leukaemia	rs6460050	chr7	73661400	A	C	0.32954	0.0508	0.008661	4.485e-09	0.288625	0.016489	0.877357
HSPB1	Acute lymphocytic leukaemia	rs6926219	chr6	122399661	A	G	0.46006	-0.0824	0.008059	1.532e-24	0.537015	0.0428811	0.659768
HSPB1	Acute lymphocytic leukaemia	rs7926172	chr11	225180	A	G	0.23069	0.0596	0.009533	4.053e-10	0.259467	-0.00466371	0.966846
CHI3L1	Acute lymphocytic leukaemia	rs114072431	chr1	195974961	A	G	0.04032	0.1702	0.024314	2.556e-12	0.0409656	0.253825	0.29665
CHI3L1	Acute lymphocytic leukaemia	rs11584227	chr1	202629647	C	T	0.27973	-0.1828	0.010754	8.505e-65	0.204073	-0.0837834	0.48891
CHI3L1	Acute lymphocytic leukaemia	rs1800894	chr1	206773321	T	C	0.0398	-0.1408	0.024872	1.506e-08	0.0240259	-0.386022	0.23784
CHI3L1	Acute lymphocytic leukaemia	rs1932023	chr1	201535061	G	A	0.15952	0.1468	0.013195	9.426e-29	0.247795	0.0116624	0.917891
CHI3L1	Acute lymphocytic leukaemia	rs28601761	chr8	125487789	G	C	0.42975	-0.0702	0.00797	1.272e-18	0.410899	-0.0523278	0.596317
CHI3L1	Acute lymphocytic leukaemia	rs6670714	chr1	193049404	C	T	0.16685	-0.0834	0.012781	6.775e-11	0.846347	-0.222726	0.0999839
CHI3L1	Acute lymphocytic leukaemia	rs6679311	chr1	204590548	C	T	0.2745	-0.0985	0.010846	1.072e-19	0.827855	-0.087445	0.49862
CHI3L1	Acute lymphocytic leukaemia	rs7516546	chr1	202852808	T	C	0.02922	-0.3396	0.028573	1.413e-32	0.963179	-0.00679385	0.979219
CHI3L1	Acute lymphocytic leukaemia	rs75228438	chr1	202995854	T	C	0.02375	0.4001	0.031552	7.568e-37	0.00454601	-0.482752	0.508809
CHI3L1	Acute lymphocytic leukaemia	rs80241012	chr1	203215796	A	G	0.14382	-0.3485	0.013696	7.837e-143	0.117855	-0.0106764	0.943285
SVEP1	Acute lymphocytic leukaemia	rs115770375	chr1	152840427	G	C	0.01782	0.2065	0.031008	2.748e-11	0.0230712	0.436047	0.17872
SVEP1	Acute lymphocytic leukaemia	rs116853336	chr9	110527672	A	T	0.01237	0.5931	0.0383	4.326e-54	0.00455983	-1.05115	0.149766
SVEP1	Acute lymphocytic leukaemia	rs117223414	chr9	108819737	A	G	0.01125	0.4052	0.04037	1.046e-23	0.00392373	-0.202406	0.811105
SVEP1	Acute lymphocytic leukaemia	rs12666169	chr7	103959297	T	C	0.12788	-0.0829	0.012246	1.291e-11	0.143486	0.0806009	0.55955
SVEP1	Acute lymphocytic leukaemia	rs1327537	chr9	110405793	A	C	0.02459	0.3403	0.026761	4.792e-37	0.989762	-0.559038	0.24004
SVEP1	Acute lymphocytic leukaemia	rs145419292	chr9	109679059	T	C	0.01613	0.5826	0.033692	5.4e-67	0.0333005	0.351561	0.198202
SVEP1	Acute lymphocytic leukaemia	rs146370544	chr9	110839795	C	T	0.03562	0.1747	0.022794	1.796e-14	0.0249151	-0.542625	0.0856801
SVEP1	Acute lymphocytic leukaemia	rs147639000	chr1	156908252	A	G	0.0245	0.6176	0.025969	5.128e-125	0.0100109	-0.242812	0.633165
SVEP1	Acute lymphocytic leukaemia	rs185970880	chr9	110693039	A	G	0.01256	0.7265	0.037283	1.439e-84	0.0453198	-0.0536568	0.821709
SVEP1	Acute lymphocytic leukaemia	rs200367989	chr1	156674988	TG	T	0.02026	0.1988	0.028776	4.898e-12	0.0175068	0.412971	0.2675
SVEP1	Acute lymphocytic leukaemia	rs34914463	chr17	7463300	C	T	0.10556	0.0733	0.013415	4.654e-08	0.0691454	-0.274258	0.153268
SVEP1	Acute lymphocytic leukaemia	rs41264285	chr1	155061442	T	C	0.27708	0.1502	0.009278	6e-59	0.175845	0.0202537	0.873645
SVEP1	Acute lymphocytic leukaemia	rs576123	chr9	133268896	T	C	0.26016	-0.0686	0.009624	1.017e-12	0.56295	0.108018	0.269168
SVEP1	Acute lymphocytic leukaemia	rs72759341	chr9	111145909	G	A	0.01913	0.3856	0.030953	1.274e-35	0.039666	0.0651716	0.793783
SVEP1	Acute lymphocytic leukaemia	rs75412647	chr9	110278247	G	C	0.02826	-0.1877	0.025025	6.357e-14	0.0225067	0.151073	0.649293
SVEP1	Acute lymphocytic leukaemia	rs76038906	chr9	110487920	T	G	0.03275	0.551	0.023578	8.755e-121	0.0124783	0.511829	0.242537
SVEP1	Acute lymphocytic leukaemia	rs78689694	chr11	126364925	C	G	0.10578	-0.0832	0.013462	6.391e-10	0.143431	-0.0324629	0.81479
SVEP1	Acute lymphocytic leukaemia	rs78742138	chr9	110498428	C	T	0.03624	0.7104	0.022257	1e-200	0.0418038	-0.274093	0.26533
SVEP1	Acute lymphocytic leukaemia	rs7935242	chr11	10302281	T	C	0.46812	-0.0494	0.008257	2.19e-09	0.511398	0.0951331	0.326394
SVEP1	Acute lymphocytic leukaemia	rs879620	chr16	3965728	T	C	0.35905	0.05	0.008615	6.472e-09	0.578248	0.0636063	0.518041
TMEM119	Acute lymphocytic leukaemia	rs10922098	chr1	196695521	T	C	0.40011	-0.0817	0.008189	1.927e-23	0.561049	-0.00464965	0.961802
TMEM119	Acute lymphocytic leukaemia	rs1355538	chr3	165787389	G	A	0.39847	-0.0481	0.008177	4.053e-09	0.672107	-0.150672	0.144439
TMEM119	Acute lymphocytic leukaemia	rs802171	chr10	16814686	G	A	0.47349	0.0633	0.008018	2.902e-15	0.564614	-0.00838317	0.931919
C11orf87	Acute lymphocytic leukaemia	rs1591734	chr1	169302664	T	C	0.1303	-0.1199	0.012124	4.64e-23	0.0988384	0.168678	0.297611
C11orf87	Acute lymphocytic leukaemia	rs184924341	chr10	20198402	G	T	0.01192	0.3206	0.036028	5.66e-19	0.00340313	1.03782	0.211793
C11orf87	Acute lymphocytic leukaemia	rs34568880	chr6	31546671	T	C	0.01722	0.1924	0.030566	3.083e-10	0.00709427	0.298607	0.601991
C11orf87	Acute lymphocytic leukaemia	rs594793	chr19	7765060	T	G	0.43083	-0.0456	0.008169	2.379e-08	0.412114	0.104043	0.291804
C11orf87	Acute lymphocytic leukaemia	rs62140549	chr2	46914826	G	A	0.30898	0.0676	0.008725	9.338e-15	0.315841	-0.157934	0.132535
C11orf87	Acute lymphocytic leukaemia	rs6427202	chr1	169559592	T	C	0.4721	-0.1418	0.008099	1.238e-68	0.654817	0.0347281	0.734368
C11orf87	Acute lymphocytic leukaemia	rs78334957	chr10	19819940	C	T	0.13736	0.1162	0.011775	5.704e-23	0.0995373	-0.00232624	0.988593
C11orf87	Acute lymphocytic leukaemia	rs9271669	chr6	32624998	G	A	0.46525	0.067	0.008077	1.084e-16	0.561143	-0.014447	0.883196
C11orf87	Acute lymphocytic leukaemia	rs927826	chr10	19931917	T	G	0.29793	0.1595	0.008829	5.985e-73	0.771577	0.0360593	0.755906
C11orf87	Acute lymphocytic leukaemia	rs9332701	chr1	169515529	G	A	0.07189	-0.3607	0.015464	2.49e-120	0.0426499	-0.283399	0.243415
SPATA20	Acute lymphocytic leukaemia	rs147604653	chr17	49734100	A	G	0.02654	0.1507	0.025619	4.047e-09	0.0186001	-0.094951	0.796804
SPATA20	Acute lymphocytic leukaemia	rs17714829	chr17	50375120	C	T	0.0781	0.1255	0.015247	1.852e-16	0.0718703	0.0153258	0.935197
SPATA20	Acute lymphocytic leukaemia	rs3020644	chr6	31926849	G	A	0.37454	-0.0698	0.008391	8.885e-17	0.361016	-0.0407403	0.688034
SPATA20	Acute lymphocytic leukaemia	rs4666000	chr2	27616502	C	T	0.22594	0.0534	0.009653	3.171e-08	0.297186	-0.00869338	0.934898
SPATA20	Acute lymphocytic leukaemia	rs6458	chr6	32039847	G	A	0.12614	0.0862	0.012306	2.473e-12	0.0776627	0.165876	0.366967
SPATA20	Acute lymphocytic leukaemia	rs77405995	chr17	50284012	A	G	0.04892	0.1222	0.018545	4.412e-11	0.0320935	-0.599574	0.0288549
SPATA20	Acute lymphocytic leukaemia	rs9890200	chr17	50547162	C	A	0.40963	-0.3204	0.007116	1e-200	0.329647	-0.0671632	0.515252
RAB17	Acute lymphocytic leukaemia	rs1047286	chr19	6713251	A	G	0.24066	-0.0572	0.009402	1.174e-09	0.174618	0.0768747	0.545999
RAB17	Acute lymphocytic leukaemia	rs10801660	chr1	198272225	A	G	0.11574	0.0796	0.01258	2.492e-10	0.112625	-0.377509	0.0135672
RAB17	Acute lymphocytic leukaemia	rs111696008	chr2	216622986	A	G	0.02443	-0.1533	0.026747	9.951e-09	0.0147953	-0.259231	0.513244
RAB17	Acute lymphocytic leukaemia	rs1265941	chr6	31904575	C	A	0.07271	0.1756	0.015476	7.678e-30	0.151525	-0.170495	0.20855
RAB17	Acute lymphocytic leukaemia	rs1329424	chr1	196677046	G	T	0.39735	-0.2918	0.008156	1e-200	0.561252	-0.0051467	0.95774
RAB17	Acute lymphocytic leukaemia	rs1707652	chr3	165761011	T	C	0.3102	0.1323	0.008668	1.331e-52	0.248628	0.196937	0.0791043
RAB17	Acute lymphocytic leukaemia	rs550671	chr6	31976816	T	C	0.14045	0.2115	0.011537	4.603e-75	0.0767293	0.074595	0.686148
RAB17	Acute lymphocytic leukaemia	rs72748420	chr1	196141224	T	C	0.07417	0.1015	0.015352	3.805e-11	0.103218	-0.0287614	0.856817
RAB17	Acute lymphocytic leukaemia	rs9276606	chr6	32768918	T	A	0.28354	0.063	0.008968	2.136e-12	0.241072	0.00253749	0.982151
NAT14	Acute lymphocytic leukaemia	rs10922098	chr1	196695521	T	C	0.40011	-0.1185	0.008103	1.973e-48	0.561049	-0.00464965	0.961802
NAT14	Acute lymphocytic leukaemia	rs1707652	chr3	165761011	T	C	0.3102	0.0682	0.008564	1.675e-15	0.248628	0.196937	0.0791043
NAT14	Acute lymphocytic leukaemia	rs704	chr17	28367840	A	G	0.49189	-0.0997	0.007945	4.055e-36	0.419906	-0.192181	0.050501
TMEM132C	Acute lymphocytic leukaemia	rs10922098	chr1	196695521	T	C	0.40011	-0.06	0.008012	6.949e-14	0.561049	-0.00464965	0.961802
TMEM132C	Acute lymphocytic leukaemia	rs141618758	chr19	11146823	C	T	0.02633	0.1856	0.024042	1.165e-14	0.0173992	-0.487161	0.190957
TMEM132C	Acute lymphocytic leukaemia	rs145639768	chr19	13472256	A	C	0.03152	0.1516	0.022831	3.133e-11	0.0161827	0.475634	0.237173
TMEM132C	Acute lymphocytic leukaemia	rs146039342	chr19	44997818	A	G	0.01786	0.1699	0.029139	5.522e-09	0.0232305	0.0255823	0.937454
BMP15	Acute lymphocytic leukaemia	rs10922098	chr1	196695521	T	C	0.40011	-0.1441	0.008015	2.884e-72	0.561049	-0.00464965	0.961802
BMP15	Acute lymphocytic leukaemia	rs1707652	chr3	165761011	T	C	0.3102	0.0813	0.008482	9.262e-22	0.248628	0.196937	0.0791043
BMP15	Acute lymphocytic leukaemia	rs58068569	chr12	3991507	G	A	0.20781	-0.0531	0.009708	4.505e-08	0.260167	-0.0458699	0.677258
BMP15	Acute lymphocytic leukaemia	rs7774739	chr6	32041524	G	A	0.17585	0.1004	0.010969	5.517e-20	0.00283685	-0.0834957	0.932347
BMP15	Acute lymphocytic leukaemia	rs9267139	chr6	31471721	A	G	0.10872	0.072	0.012542	9.439e-09	0.182723	-0.161392	0.202138
BMP15	Acute lymphocytic leukaemia	rs9271683	chr6	32625173	T	C	0.27332	0.0596	0.008783	1.154e-11	0.754506	0.055393	0.623116
CACNB4	Acute lymphocytic leukaemia	rs114694170	chr5	88884379	C	T	0.08378	-0.0904	0.014717	8.114e-10	0.0561461	-0.0581121	0.782723
CACNB4	Acute lymphocytic leukaemia	rs1354034	chr3	56815721	C	T	0.38119	0.1019	0.008337	2.339e-34	0.704977	-0.125325	0.242803
CACNB4	Acute lymphocytic leukaemia	rs7975385	chr12	48797209	C	T	0.24761	0.1289	0.009409	1.016e-42	0.18671	0.0407731	0.744223
MTRF1L	Acute lymphocytic leukaemia	rs10922098	chr1	196695521	T	C	0.40011	-0.0645	0.008057	1.195e-15	0.561049	-0.00464965	0.961802
MTRF1L	Acute lymphocytic leukaemia	rs2038332	chr6	152999591	G	A	0.2119	-0.1934	0.009618	6.321e-90	0.199325	0.113845	0.347379
MTRF1L	Acute lymphocytic leukaemia	rs6542680	chr2	3592552	T	C	0.18362	-0.0566	0.010212	2.981e-08	0.648336	-0.149514	0.147278
CSF2RB	Acute lymphocytic leukaemia	rs10922098	chr1	196695521	T	C	0.40011	-0.1633	0.008024	4.489e-92	0.561049	-0.00464965	0.961802
CSF2RB	Acute lymphocytic leukaemia	rs1707652	chr3	165761011	T	C	0.3102	0.0901	0.008503	3.086e-26	0.248628	0.196937	0.0791043
CSF2RB	Acute lymphocytic leukaemia	rs34927613	chr6	32632434	A	G	0.29339	0.0649	0.008588	4.11e-14	0.32891	-0.0342339	0.742169
CSF2RB	Acute lymphocytic leukaemia	rs550671	chr6	31976816	T	C	0.14045	0.1264	0.011314	5.601e-29	0.0767293	0.074595	0.686148
COL1A1	Acute lymphocytic leukaemia	rs1056692	chr12	53293603	G	A	0.3169	-0.0493	0.008925	3.318e-08	0.320718	0.154779	0.135469
COL1A1	Acute lymphocytic leukaemia	rs10842700	chr12	26277428	G	C	0.25138	-0.0533	0.009561	2.483e-08	0.738755	0.0677721	0.543074
COL1A1	Acute lymphocytic leukaemia	rs10955915	chr8	118951308	G	A	0.48	0.0543	0.008327	6.995e-11	0.548145	-0.0608931	0.533239
COL1A1	Acute lymphocytic leukaemia	rs116585561	chr17	50180556	C	A	0.03327	-0.328	0.023063	6.715e-46	0.0348157	0.329062	0.215791
COL1A1	Acute lymphocytic leukaemia	rs11726170	chr4	38391654	T	C	0.13062	0.0729	0.012273	2.85e-09	0.0584368	0.134414	0.523722
COL1A1	Acute lymphocytic leukaemia	rs118081843	chr17	50335804	C	A	0.01174	-0.3212	0.040959	4.435e-15	0.0287988	-0.251094	0.39526
COL1A1	Acute lymphocytic leukaemia	rs138103546	chr17	49894179	G	A	0.01993	-0.237	0.030488	7.625e-15	0.0344487	0.115481	0.66491
COL1A1	Acute lymphocytic leukaemia	rs139072136	chr17	44298644	A	C	0.01199	-0.2568	0.037584	8.329e-12	0.0177289	0.561455	0.138927
COL1A1	Acute lymphocytic leukaemia	rs145495890	chr17	62499184	T	C	0.03969	-0.1938	0.021627	3.215e-19	0.105945	0.231297	0.140809
COL1A1	Acute lymphocytic leukaemia	rs146385050	chr17	62559897	A	C	0.20263	0.248	0.010457	2.437e-124	0.161683	-0.0525765	0.695509
COL1A1	Acute lymphocytic leukaemia	rs148047098	chr17	62515649	C	G	0.01548	-0.2674	0.033081	6.311e-16	0.0226466	-0.182181	0.578492
COL1A1	Acute lymphocytic leukaemia	rs149631508	chr17	62782860	C	T	0.01743	0.2184	0.032284	1.334e-11	0.00517333	0.0463327	0.946828
COL1A1	Acute lymphocytic leukaemia	rs2663343	chr17	1023500	A	G	0.31972	0.0601	0.009033	2.868e-11	0.437345	-0.0878412	0.368194
COL1A1	Acute lymphocytic leukaemia	rs62071464	chr17	52261352	A	T	0.01225	-0.2367	0.039429	1.935e-09	0.0454527	-0.0187516	0.934815
COL1A1	Acute lymphocytic leukaemia	rs6679677	chr1	113761186	A	C	0.13318	-0.0745	0.012308	1.423e-09	0.147023	-0.0874448	0.526434
COL1A1	Acute lymphocytic leukaemia	rs74485878	chr17	51855685	T	C	0.01629	-0.2494	0.033849	1.732e-13	0.0148237	0.616864	0.128192
COL1A1	Acute lymphocytic leukaemia	rs9594738	chr13	42378009	T	C	0.4356	0.1011	0.008404	2.478e-33	0.530386	0.0626612	0.521458
ANGPTL1	Acute lymphocytic leukaemia	rs10213052	chr4	174897101	C	T	0.26945	0.0515	0.009088	1.455e-08	0.351415	0.023808	0.816219
ANGPTL1	Acute lymphocytic leukaemia	rs12130811	chr1	177546126	A	G	0.12063	-0.0921	0.012577	2.43e-13	0.154382	0.0685259	0.608952
ANGPTL1	Acute lymphocytic leukaemia	rs140477729	chr1	179134848	T	G	0.01607	0.1785	0.032565	4.22e-08	0.0058938	0.140843	0.821151
ANGPTL1	Acute lymphocytic leukaemia	rs2477664	chr10	17833817	A	T	0.44816	0.046	0.008131	1.538e-08	0.467027	0.040272	0.679859
ANGPTL1	Acute lymphocytic leukaemia	rs333947	chr1	109928142	A	G	0.14937	-0.0647	0.011561	2.188e-08	0.166592	-0.0521817	0.687407
ANGPTL1	Acute lymphocytic leukaemia	rs4457535	chr1	178528051	G	A	0.37199	-0.2531	0.008364	1e-200	0.377089	-0.0964792	0.338469
ANGPTL1	Acute lymphocytic leukaemia	rs4681671	chr3	58242901	T	G	0.49918	-0.0449	0.008084	2.793e-08	0.500247	-0.0341499	0.725964
ANGPTL1	Acute lymphocytic leukaemia	rs6678237	chr1	168639966	G	A	0.06933	-0.1008	0.016267	5.771e-10	0.0757466	0.168398	0.361962
ANGPTL1	Acute lymphocytic leukaemia	rs78811502	chr1	180072659	C	T	0.02787	0.2238	0.024913	2.626e-19	0.00972633	0.463158	0.354193
OLFM3	Acute lymphocytic leukaemia	rs1355538	chr3	165787389	G	A	0.39847	-0.0522	0.00816	1.585e-10	0.672107	-0.150672	0.144439
OLFM3	Acute lymphocytic leukaemia	rs2075798	chr6	31878964	A	C	0.0783	0.0816	0.014903	4.362e-08	0.158127	-0.176805	0.184641
OLFM3	Acute lymphocytic leukaemia	rs550671	chr6	31976816	T	C	0.14045	0.0817	0.011486	1.133e-12	0.0767293	0.074595	0.686148
OLFM3	Acute lymphocytic leukaemia	rs572515	chr1	196677131	G	A	0.3973	-0.1031	0.008172	1.709e-36	0.561231	-0.00508186	0.95827
KIAA1549L	Acute lymphocytic leukaemia	rs10922098	chr1	196695521	T	C	0.40011	-0.0785	0.008234	1.515e-21	0.561049	-0.00464965	0.961802
KIAA1549L	Acute lymphocytic leukaemia	rs143077049	chr11	33979412	G	A	0.03777	0.1475	0.021348	4.87e-12	0.0173645	0.095716	0.79778
KIAA1549L	Acute lymphocytic leukaemia	rs4756649	chr11	33372394	C	T	0.40575	-0.2497	0.008218	1e-200	0.643482	-0.0811863	0.42636
KIAA1549L	Acute lymphocytic leukaemia	rs55714927	chr17	7176997	T	C	0.21166	0.0572	0.009926	8.27e-09	0.262341	-0.194079	0.08127
KIAA1549L	Acute lymphocytic leukaemia	rs635634	chr9	133279427	C	T	0.12995	0.1079	0.011991	2.292e-19	0.798126	0.00985027	0.934862
KIAA1549L	Acute lymphocytic leukaemia	rs762044	chr11	33511939	C	T	0.4504	-0.1267	0.008175	3.528e-54	0.489776	0.161881	0.0943887
TLR1	Acute lymphocytic leukaemia	rs10922098	chr1	196695521	T	C	0.40011	-0.0783	0.008014	1.51e-22	0.561049	-0.00464965	0.961802
TLR1	Acute lymphocytic leukaemia	rs149468457	chr3	124755073	A	G	0.09594	-0.0759	0.013277	1.087e-08	0.103681	0.0184433	0.908065
TLR1	Acute lymphocytic leukaemia	rs1555405	chr14	100710432	A	G	0.30381	-0.0494	0.008564	8e-09	0.352457	-0.11776	0.246289
TLR1	Acute lymphocytic leukaemia	rs56210800	chr3	124753745	G	C	0.09593	-0.0757	0.013266	1.154e-08	0.103681	0.0184183	0.908188
TLR1	Acute lymphocytic leukaemia	rs9271642	chr6	32624442	G	A	0.41291	0.0508	0.00794	1.578e-10	0.583289	0.00590251	0.952131
KLK13	Acute lymphocytic leukaemia	rs1039405	chr19	51122980	G	A	0.45344	-0.0504	0.009028	2.367e-08	0.610858	-0.0645934	0.518991
KLK13	Acute lymphocytic leukaemia	rs11669237	chr19	51030161	G	C	0.3621	-0.4217	0.006997	1e-200	0.384821	-0.0563384	0.572196
KLK13	Acute lymphocytic leukaemia	rs116960573	chr19	51181877	T	G	0.05439	-0.2765	0.019857	4.497e-44	0.0164252	-0.22282	0.555474
KLK13	Acute lymphocytic leukaemia	rs12368376	chr12	515011	G	C	0.19318	-0.0686	0.011082	6.01e-10	0.194827	-0.0314821	0.798752
KLK13	Acute lymphocytic leukaemia	rs12712266	chr2	106933402	C	T	0.40029	0.052	0.008963	6.56e-09	0.631172	0.0151279	0.880305
KLK13	Acute lymphocytic leukaemia	rs17855739	chr19	5831829	T	C	0.03389	0.1899	0.024425	7.564e-15	0.0296965	-0.03999	0.890205
KLK13	Acute lymphocytic leukaemia	rs1992880	chr2	106748586	G	C	0.43988	0.0657	0.008836	1.044e-13	0.442571	-0.10248	0.295745
KLK13	Acute lymphocytic leukaemia	rs2479016	chr6	2245111	G	A	0.33808	-0.0572	0.00928	7.091e-10	0.377141	-0.0926078	0.356481
KLK13	Acute lymphocytic leukaemia	rs2548459	chr19	48706082	C	T	0.37265	-0.0862	0.009292	1.75e-20	0.410542	-0.140749	0.155158
KLK13	Acute lymphocytic leukaemia	rs2691230	chr19	51044518	A	T	0.29419	-0.1002	0.00979	1.386e-24	0.318388	0.269539	0.0101527
KLK13	Acute lymphocytic leukaemia	rs5511	chr14	94567258	T	A	0.24419	0.1177	0.010293	2.789e-30	0.272549	-0.228902	0.0360438
KLK13	Acute lymphocytic leukaemia	rs55714927	chr17	7176997	T	C	0.21166	0.0798	0.010804	1.515e-13	0.262341	-0.194079	0.08127
KLK13	Acute lymphocytic leukaemia	rs73051038	chr19	51083701	C	G	0.10457	0.168	0.014557	8.248e-31	0.0690257	-0.0500545	0.79492
NFE2L1	Acute lymphocytic leukaemia	rs11451044	chr12	54322000	CA	C	0.43683	0.0668	0.00797	5.248e-17	0.678008	0.0441478	0.67225
NFE2L1	Acute lymphocytic leukaemia	rs1354034	chr3	56815721	C	T	0.38119	0.0501	0.008118	6.758e-10	0.704977	-0.125325	0.242803
NFE2L1	Acute lymphocytic leukaemia	rs342292	chr7	106730198	G	C	0.45188	-0.0622	0.007894	3.28e-15	0.481758	-8.32414e-05	0.999317
COL6A5	Acute lymphocytic leukaemia	rs10922098	chr1	196695521	T	C	0.40011	-0.0624	0.007997	6.056e-15	0.561049	-0.00464965	0.961802
COL6A5	Acute lymphocytic leukaemia	rs2072634	chr6	31949514	T	C	0.0365	0.114	0.020724	3.777e-08	0.025114	-0.0696574	0.821886
COL6A5	Acute lymphocytic leukaemia	rs9271642	chr6	32624442	G	A	0.41291	0.0523	0.007908	3.755e-11	0.583289	0.00590251	0.952131
RNF122	Acute lymphocytic leukaemia	rs111696008	chr2	216622986	A	G	0.02443	-0.1518	0.026988	1.859e-08	0.0147953	-0.259231	0.513244
RNF122	Acute lymphocytic leukaemia	rs1707652	chr3	165761011	T	C	0.3102	0.1234	0.008742	3.061e-45	0.248628	0.196937	0.0791043
RNF122	Acute lymphocytic leukaemia	rs34927613	chr6	32632434	A	G	0.29339	0.0486	0.008834	3.771e-08	0.32891	-0.0342339	0.742169
RNF122	Acute lymphocytic leukaemia	rs71352239	chr19	44926286	T	C	0.30263	0.08	0.008858	1.697e-19	0.304617	-0.0359426	0.738919
RNF122	Acute lymphocytic leukaemia	rs964184	chr11	116778201	C	G	0.12321	-0.0772	0.012276	3.203e-10	0.855465	0.186323	0.176306
FAM162B	Acute lymphocytic leukaemia	rs147906938	chr6	31930134	A	T	0.03884	0.14	0.02017	3.898e-12	0.0263923	-0.115052	0.703743
FAM162B	Acute lymphocytic leukaemia	rs6445035	chr3	165762312	A	G	0.1904	0.0647	0.01001	1.022e-10	0.176283	0.234745	0.0632135
FAM162B	Acute lymphocytic leukaemia	rs6542680	chr2	3592552	T	C	0.18362	-0.0592	0.010197	6.404e-09	0.648336	-0.149514	0.147278
MTMR1	Acute lymphocytic leukaemia	rs1047286	chr19	6713251	A	G	0.24066	-0.0527	0.009348	1.727e-08	0.174618	0.0768747	0.545999
MTMR1	Acute lymphocytic leukaemia	rs10922098	chr1	196695521	T	C	0.40011	-0.1949	0.008127	4.375e-127	0.561049	-0.00464965	0.961802
MTMR1	Acute lymphocytic leukaemia	rs12478841	chr2	27588855	G	A	0.21569	0.0559	0.009634	6.544e-09	0.279299	-0.0775535	0.474464
MTMR1	Acute lymphocytic leukaemia	rs1265941	chr6	31904575	C	A	0.07271	0.1262	0.015366	2.154e-16	0.151525	-0.170495	0.20855
MTMR1	Acute lymphocytic leukaemia	rs144704969	chr1	196158214	T	C	0.04536	0.1068	0.019084	2.188e-08	0.120976	-0.251426	0.0920428
MTMR1	Acute lymphocytic leukaemia	rs1707652	chr3	165761011	T	C	0.3102	0.0945	0.008623	6.036e-28	0.248628	0.196937	0.0791043
MTMR1	Acute lymphocytic leukaemia	rs550671	chr6	31976816	T	C	0.14045	0.1401	0.011474	2.73e-34	0.0767293	0.074595	0.686148
MTMR1	Acute lymphocytic leukaemia	rs9276606	chr6	32768918	T	A	0.28354	0.0488	0.008895	4.104e-08	0.241072	0.00253749	0.982151
MEGF10	Acute lymphocytic leukaemia	rs10922098	chr1	196695521	T	C	0.40011	-0.1508	0.007967	6.845e-80	0.561049	-0.00464965	0.961802
MEGF10	Acute lymphocytic leukaemia	rs1355538	chr3	165787389	G	A	0.39847	-0.0646	0.007986	6.017e-16	0.672107	-0.150672	0.144439
MEGF10	Acute lymphocytic leukaemia	rs7774739	chr6	32041524	G	A	0.17585	0.0865	0.010919	2.338e-15	0.00283685	-0.0834957	0.932347
MEGF10	Acute lymphocytic leukaemia	rs9267139	chr6	31471721	A	G	0.10872	0.0698	0.012497	2.332e-08	0.182723	-0.161392	0.202138
MEGF10	Acute lymphocytic leukaemia	rs9271683	chr6	32625173	T	C	0.27332	0.0658	0.00874	5.118e-14	0.754506	0.055393	0.623116
MILR1	Acute lymphocytic leukaemia	rs10922098	chr1	196695521	T	C	0.40011	-0.0677	0.00809	5.827e-17	0.561049	-0.00464965	0.961802
MILR1	Acute lymphocytic leukaemia	rs1555405	chr14	100710432	A	G	0.30381	-0.0497	0.008644	8.944e-09	0.352457	-0.11776	0.246289
MILR1	Acute lymphocytic leukaemia	rs1926446	chr13	46055860	A	C	0.24321	-0.069	0.009285	1.075e-13	0.804208	-0.189845	0.122462
MILR1	Acute lymphocytic leukaemia	rs2057681	chr7	95308945	G	A	0.28541	0.077	0.008796	2.059e-18	0.266011	-0.0732306	0.50488
MILR1	Acute lymphocytic leukaemia	rs697356	chr3	165718150	C	G	0.36502	0.0472	0.00821	8.983e-09	0.322253	0.135682	0.190749
THSD7A	Acute lymphocytic leukaemia	rs1260326	chr2	27508073	C	T	0.34132	-0.0489	0.008394	5.701e-09	0.650149	0.116298	0.253911
THSD7A	Acute lymphocytic leukaemia	rs2808466	chr1	207100406	C	T	0.11154	0.2134	0.012615	3.431e-64	0.100954	-0.354476	0.0270633
THSD7A	Acute lymphocytic leukaemia	rs28593765	chr14	105893760	A	G	0.099	0.0862	0.014207	1.298e-09	0.125544	-0.229618	0.135241
THSD7A	Acute lymphocytic leukaemia	rs45574833	chr1	207126725	A	G	0.01255	-0.3164	0.036779	7.78e-18	0.0546035	0.0784171	0.718646
THSD7A	Acute lymphocytic leukaemia	rs9273429	chr6	32659679	A	G	0.4381	0.0772	0.008001	4.973e-22	0.641724	0.0531771	0.597996
KRT5	Acute lymphocytic leukaemia	rs10506306	chr12	52357876	C	G	0.16797	-0.0585	0.010687	4.407e-08	0.187411	-0.0750527	0.547863
KRT5	Acute lymphocytic leukaemia	rs111494201	chr17	42135981	A	G	0.05268	-0.1411	0.018015	4.79e-15	0.0124237	-0.223009	0.606562
KRT5	Acute lymphocytic leukaemia	rs113543611	chr1	150603278	T	C	0.04681	0.1961	0.018864	2.601e-25	0.0465799	-0.0929802	0.687361
KRT5	Acute lymphocytic leukaemia	rs117484558	chr17	41586669	A	G	0.0311	-0.2842	0.022787	1.061e-35	0.0064111	0.0456698	0.939292
KRT5	Acute lymphocytic leukaemia	rs118132312	chr17	39694762	G	A	0.0434	-0.1272	0.019638	9.344e-11	0.0185786	-0.216341	0.556911
KRT5	Acute lymphocytic leukaemia	rs17580	chr14	94380925	A	T	0.03316	0.2339	0.022502	2.621e-25	0.00915828	-0.00435212	0.993104
KRT5	Acute lymphocytic leukaemia	rs186618212	chr17	40237602	T	C	0.02757	-0.2037	0.024031	2.321e-17	0.00434851	-0.440453	0.561353
KRT5	Acute lymphocytic leukaemia	rs58539907	chr17	40101687	C	T	0.02867	-0.179	0.024186	1.351e-13	0.00641913	-0.205539	0.746887
KRT5	Acute lymphocytic leukaemia	rs641621	chr12	52519122	T	G	0.2322	-0.1558	0.009418	1.808e-61	0.242637	0.0779932	0.491343
KRT5	Acute lymphocytic leukaemia	rs7240884	chr18	59901461	G	A	0.43472	0.0754	0.008084	1.092e-20	0.501277	-0.0406592	0.676905
SVEP1	Acute lymphocytic leukaemia	rs112639900	chr9	111634841	C	T	0.01017	0.6182	0.043331	3.513e-46	0.00597942	0.782286	0.23071
SVEP1	Acute lymphocytic leukaemia	rs115770375	chr1	152840427	G	C	0.01782	0.1877	0.03095	1.322e-09	0.0230712	0.436047	0.17872
SVEP1	Acute lymphocytic leukaemia	rs117223414	chr9	108819737	A	G	0.01125	0.3476	0.040292	6.297e-18	0.00392373	-0.202406	0.811105
SVEP1	Acute lymphocytic leukaemia	rs117584091	chr9	110964532	C	A	0.0202	0.2659	0.029954	6.873e-19	0.0145386	0.446917	0.269775
SVEP1	Acute lymphocytic leukaemia	rs145419292	chr9	109679059	T	C	0.01613	0.5093	0.033656	9.888e-52	0.0333005	0.351561	0.198202
SVEP1	Acute lymphocytic leukaemia	rs147639000	chr1	156908252	A	G	0.0245	0.66	0.025886	2.144e-143	0.0100109	-0.242812	0.633165
SVEP1	Acute lymphocytic leukaemia	rs151231214	chr9	111629338	T	C	0.05118	0.1386	0.018793	1.641e-13	0.0202088	0.135513	0.692537
SVEP1	Acute lymphocytic leukaemia	rs200367989	chr1	156674988	TG	T	0.02026	0.2072	0.028716	5.372e-13	0.0175068	0.412971	0.2675
SVEP1	Acute lymphocytic leukaemia	rs2923099	chr11	10347793	A	C	0.41083	-0.0513	0.008331	7.366e-10	0.436498	0.160549	0.100641
SVEP1	Acute lymphocytic leukaemia	rs45444697	chr1	155062156	G	C	0.27705	0.1598	0.009252	7.55e-67	0.175882	0.0194738	0.878444
SVEP1	Acute lymphocytic leukaemia	rs7020788	chr9	110470699	A	G	0.39454	0.1951	0.008508	2.298e-116	0.382293	-0.0255059	0.798934
SVEP1	Acute lymphocytic leukaemia	rs74617664	chr7	103951132	C	T	0.08119	-0.0919	0.015012	9.259e-10	0.084817	0.0527374	0.760932
SVEP1	Acute lymphocytic leukaemia	rs75733144	chr9	113661166	G	C	0.01858	0.2973	0.03087	5.925e-22	0.0055791	-0.663539	0.292278
SVEP1	Acute lymphocytic leukaemia	rs78742138	chr9	110498428	C	T	0.03624	0.7642	0.022163	1e-200	0.0418038	-0.274093	0.26533
SVEP1	Acute lymphocytic leukaemia	rs7952602	chr11	126363774	C	G	0.10953	-0.0723	0.013175	4.076e-08	0.15383	-0.0241754	0.85699
SVEP1	Acute lymphocytic leukaemia	rs879620	chr16	3965728	T	C	0.35905	0.0484	0.008597	1.801e-08	0.578248	0.0636063	0.518041
SMARCC1	Acute lymphocytic leukaemia	rs10922098	chr1	196695521	T	C	0.40011	-0.1773	0.007966	9.466e-110	0.561049	-0.00464965	0.961802
SMARCC1	Acute lymphocytic leukaemia	rs114009540	chr1	196158413	A	G	0.03606	-0.1215	0.021199	9.958e-09	0.0166561	-0.512092	0.171104
SMARCC1	Acute lymphocytic leukaemia	rs157592	chr19	44921257	C	A	0.19786	-0.0591	0.00996	2.96e-09	0.273486	0.142947	0.19207
SMARCC1	Acute lymphocytic leukaemia	rs2230203	chr19	6710771	T	G	0.22859	-0.0579	0.009313	5.054e-10	0.149795	0.0875808	0.517433
SMARCC1	Acute lymphocytic leukaemia	rs2686395	chr3	165767231	C	T	0.3101	-0.087	0.008445	6.902e-25	0.75359	-0.197297	0.0795353
SMARCC1	Acute lymphocytic leukaemia	rs7774739	chr6	32041524	G	A	0.17585	0.0862	0.010931	3.125e-15	0.00283685	-0.0834957	0.932347
SMARCC1	Acute lymphocytic leukaemia	rs9267139	chr6	31471721	A	G	0.10872	0.0707	0.012497	1.537e-08	0.182723	-0.161392	0.202138
SMARCC1	Acute lymphocytic leukaemia	rs9271683	chr6	32625173	T	C	0.27332	0.0551	0.008744	2.953e-10	0.754506	0.055393	0.623116
CLEC12A	Acute lymphocytic leukaemia	rs113247892	chr12	10234507	T	A	0.12283	0.2589	0.012592	6.215e-94	0.122665	0.143636	0.348175
CLEC12A	Acute lymphocytic leukaemia	rs11888817	chr2	62303845	C	T	0.32877	0.0521	0.006754	1.217e-14	0.650709	0.0945448	0.351446
CLEC12A	Acute lymphocytic leukaemia	rs11920688	chr3	99037090	T	C	0.3842	0.0464	0.006535	1.245e-12	0.609998	-0.000923416	0.992582
CLEC12A	Acute lymphocytic leukaemia	rs12826805	chr12	11298008	A	G	0.03768	0.2213	0.021781	2.981e-24	0.0452804	0.0544545	0.818325
CLEC12A	Acute lymphocytic leukaemia	rs138092566	chr12	10757225	T	C	0.01804	0.3419	0.030921	2.024e-28	0.019955	-0.0070497	0.984198
CLEC12A	Acute lymphocytic leukaemia	rs141864201	chr12	6742143	A	G	0.02162	-0.1891	0.029236	9.931e-11	0.0181631	0.190864	0.587867
CLEC12A	Acute lymphocytic leukaemia	rs145271031	chr12	7468861	T	A	0.02613	0.2455	0.026297	1.002e-20	0.015166	-0.368237	0.371566
CLEC12A	Acute lymphocytic leukaemia	rs2244387	chr12	10593786	A	G	0.20187	0.0903	0.010404	3.985e-18	0.823075	0.0627063	0.62324
CLEC12A	Acute lymphocytic leukaemia	rs2470750	chr3	98971748	T	A	0.45433	-0.0747	0.006408	2.127e-31	0.426232	-0.100958	0.304933
CLEC12A	Acute lymphocytic leukaemia	rs3759253	chr12	10777477	T	G	0.07461	0.1656	0.0159	2.122e-25	0.0605292	0.00794606	0.968944
CLEC12A	Acute lymphocytic leukaemia	rs4455675	chr6	95635994	C	T	0.11738	-0.0542	0.009883	4.154e-08	0.927115	-0.0714891	0.702043
CLEC12A	Acute lymphocytic leukaemia	rs4644106	chr6	31351809	T	C	0.25981	0.0493	0.007269	1.18e-11	0.778302	-0.0910402	0.439487
CLEC12A	Acute lymphocytic leukaemia	rs486890	chr12	9917748	G	A	0.40311	0.3486	0.004809	1e-200	0.661427	0.0886172	0.387816
CLEC12A	Acute lymphocytic leukaemia	rs509227	chr6	10535358	C	A	0.4996	0.0395	0.006349	4.918e-10	0.519429	-0.0338135	0.727224
CLEC12A	Acute lymphocytic leukaemia	rs7132536	chr12	10068722	G	C	0.27546	0.2386	0.009283	1.063e-145	0.6197	0.0559603	0.577992
CLEC12A	Acute lymphocytic leukaemia	rs71453409	chr12	10933750	C	T	0.02031	0.5275	0.029426	7.377e-72	0.00263752	-0.088572	0.928575
CLEC12A	Acute lymphocytic leukaemia	rs7300976	chr12	8281726	C	A	0.34557	0.0496	0.008846	2.058e-08	0.70365	-0.0254389	0.815277
CLEC12A	Acute lymphocytic leukaemia	rs80338457	chr12	10000614	G	A	0.03561	-0.5953	0.02257	2.602e-153	0.00760647	0.856182	0.126424
TINAGL1	Acute lymphocytic leukaemia	rs11842143	chr13	110266627	C	G	0.39776	-0.0639	0.008488	5.127e-14	0.352375	0.0595059	0.557806
TINAGL1	Acute lymphocytic leukaemia	rs1260326	chr2	27508073	C	T	0.34132	0.0755	0.008822	1.148e-17	0.650149	0.116298	0.253911
TINAGL1	Acute lymphocytic leukaemia	rs13088856	chr3	159837169	G	T	0.30115	0.0571	0.009081	3.217e-10	0.23132	0.0399804	0.72838
TINAGL1	Acute lymphocytic leukaemia	rs144600577	chr15	101367885	T	C	0.02061	0.2521	0.029641	1.812e-17	0.0259844	0.366032	0.237734
TINAGL1	Acute lymphocytic leukaemia	rs2128699	chr1	21647715	T	C	0.32548	-0.0555	0.00894	5.356e-10	0.658299	0.0334263	0.744185
TINAGL1	Acute lymphocytic leukaemia	rs2277998	chr19	7766742	A	G	0.28867	-0.054	0.009219	4.703e-09	0.300341	0.00117728	0.991148
TINAGL1	Acute lymphocytic leukaemia	rs2477664	chr10	17833817	A	T	0.44816	0.0507	0.008394	1.539e-09	0.467027	0.040272	0.679859
TINAGL1	Acute lymphocytic leukaemia	rs2523535	chr6	31368473	G	A	0.36388	-0.0482	0.008686	2.875e-08	0.289303	-0.0990273	0.353419
TINAGL1	Acute lymphocytic leukaemia	rs28529205	chr15	101465567	A	C	0.13582	0.1172	0.012181	6.482e-22	0.0924491	0.0191698	0.908562
TINAGL1	Acute lymphocytic leukaemia	rs544012	chr13	110226292	G	T	0.26724	-0.0727	0.009377	8.961e-15	0.786239	-0.0836147	0.482194
TINAGL1	Acute lymphocytic leukaemia	rs6061230	chr20	62371133	T	A	0.33635	-0.0829	0.008888	1.089e-20	0.306533	-0.136841	0.194373
TINAGL1	Acute lymphocytic leukaemia	rs7310615	chr12	111427245	G	C	0.37607	-0.0581	0.008604	1.453e-11	0.586289	0.0080154	0.935264
TINAGL1	Acute lymphocytic leukaemia	rs895394	chr15	101529541	T	C	0.40743	-0.0664	0.008503	5.743e-15	0.506744	-0.0737738	0.449372
TINAGL1	Acute lymphocytic leukaemia	rs897471	chr1	21864961	A	G	0.27509	-0.1165	0.009357	1.39e-35	0.734792	0.150161	0.175539
TINAGL1	Acute lymphocytic leukaemia	rs945214	chr1	31581704	G	A	0.45552	-0.1075	0.008398	1.618e-37	0.536385	-0.174195	0.073748
CREB3L1	Acute lymphocytic leukaemia	rs10922098	chr1	196695521	T	C	0.40011	-0.1035	0.007984	1.992e-38	0.561049	-0.00464965	0.961802
CREB3L1	Acute lymphocytic leukaemia	rs1355538	chr3	165787389	G	A	0.39847	-0.057	0.007986	9.534e-13	0.672107	-0.150672	0.144439
CREB3L1	Acute lymphocytic leukaemia	rs7774739	chr6	32041524	G	A	0.17585	0.0674	0.010921	6.772e-10	0.00283685	-0.0834957	0.932347
TBX5	Acute lymphocytic leukaemia	rs6457457	chr6	31910331	T	C	0.06527	0.0926	0.015922	6.033e-09	0.148073	-0.182907	0.182026
TBX5	Acute lymphocytic leukaemia	rs697357	chr3	165718484	G	A	0.38884	0.0504	0.008053	3.886e-10	0.340413	0.123836	0.2258
TBX5	Acute lymphocytic leukaemia	rs7137828	chr12	111494996	T	C	0.38049	-0.0449	0.008118	3.188e-08	0.586008	0.00826641	0.933176
MSR1	Acute lymphocytic leukaemia	rs1707652	chr3	165761011	T	C	0.3102	0.0583	0.008578	1.073e-11	0.248628	0.196937	0.0791043
MSR1	Acute lymphocytic leukaemia	rs2304200	chr19	15469847	A	G	0.10855	-0.2607	0.012768	1.134e-92	0.0708097	0.0664502	0.731174
MSR1	Acute lymphocytic leukaemia	rs415620	chr6	32041502	C	T	0.16036	0.0739	0.011328	6.865e-11	0.0089701	-0.0536054	0.926839
MSR1	Acute lymphocytic leukaemia	rs572515	chr1	196677131	G	A	0.3973	-0.1145	0.00812	3.755e-45	0.561231	-0.00508186	0.95827
NAGPA	Acute lymphocytic leukaemia	rs112366035	chr16	5260975	A	C	0.016	-0.2477	0.032676	3.441e-14	0.0122445	-0.0331091	0.941556
NAGPA	Acute lymphocytic leukaemia	rs117959699	chr16	4970842	C	G	0.18092	0.1877	0.010966	1.129e-65	0.145956	-0.00881597	0.949085
NAGPA	Acute lymphocytic leukaemia	rs118096022	chr16	5776506	A	G	0.02766	-0.1854	0.025736	5.854e-13	0.0257079	-0.13851	0.664659
NAGPA	Acute lymphocytic leukaemia	rs12280645	chr11	126393990	G	A	0.33798	0.0499	0.00877	1.27e-08	0.297203	0.015395	0.884964
NAGPA	Acute lymphocytic leukaemia	rs35416418	chr16	4982673	C	G	0.10768	-0.4451	0.013419	1e-200	0.0870589	-0.0196334	0.908558
NAGPA	Acute lymphocytic leukaemia	rs547187	chr10	17846717	T	C	0.43578	-0.0482	0.008387	9.077e-09	0.479099	-0.0903822	0.356143
NAGPA	Acute lymphocytic leukaemia	rs55714927	chr17	7176997	T	C	0.21166	0.0688	0.010242	1.849e-11	0.262341	-0.194079	0.08127
NAGPA	Acute lymphocytic leukaemia	rs635634	chr9	133279427	C	T	0.12995	0.12	0.01237	2.98e-22	0.798126	0.00985027	0.934862
NAGPA	Acute lymphocytic leukaemia	rs7196133	chr16	5358059	A	G	0.44861	-0.0767	0.008586	4.159e-19	0.416983	-0.000282752	0.997717
NAGPA	Acute lymphocytic leukaemia	rs72766568	chr16	4339829	A	C	0.02574	-0.1765	0.027342	1.081e-10	0.0402618	-0.0808673	0.746213
NAGPA	Acute lymphocytic leukaemia	rs75520381	chr16	5737709	G	A	0.06287	-0.1175	0.017457	1.687e-11	0.083771	0.23147	0.193296
NAGPA	Acute lymphocytic leukaemia	rs77294552	chr16	5370128	C	G	0.05821	-0.2109	0.018333	1.262e-30	0.0565406	-0.128991	0.544056
TBCE	Acute lymphocytic leukaemia	rs10876550	chr12	54318524	A	G	0.43699	0.0508	0.008228	6.66e-10	0.677995	0.0442492	0.67157
TBCE	Acute lymphocytic leukaemia	rs1109867	chr2	219218731	T	G	0.10541	0.0877	0.013351	5.076e-11	0.949887	0.294862	0.191791
TBCE	Acute lymphocytic leukaemia	rs1354034	chr3	56815721	C	T	0.38119	0.0703	0.00837	4.493e-17	0.704977	-0.125325	0.242803
TBCE	Acute lymphocytic leukaemia	rs34099250	chr1	235056162	G	A	0.34948	-0.0554	0.008512	7.604e-11	0.409936	9.43576e-05	0.99924
TBCE	Acute lymphocytic leukaemia	rs4980320	chr11	198986	C	T	0.46986	0.0528	0.008148	9.171e-11	0.479149	0.0357157	0.716015
TBCE	Acute lymphocytic leukaemia	rs903347	chr1	235423298	T	C	0.38663	-0.1006	0.008345	1.813e-33	0.624194	0.0424191	0.673062
TXNDC5	Acute lymphocytic leukaemia	rs1043784	chr6	7881698	C	T	0.10918	-0.1949	0.013075	3.001e-50	0.15594	0.0587774	0.66056
TXNDC5	Acute lymphocytic leukaemia	rs112483799	chr6	8941812	G	A	0.02332	0.223	0.027034	1.601e-16	0.0147199	-0.240452	0.552245
TXNDC5	Acute lymphocytic leukaemia	rs115447463	chr6	10804039	A	T	0.0243	0.1503	0.026338	1.152e-08	0.00414771	0.129451	0.86684
TXNDC5	Acute lymphocytic leukaemia	rs13209436	chr6	8133259	T	C	0.0146	0.2466	0.033498	1.816e-13	0.00653057	-0.57859	0.341911
TXNDC5	Acute lymphocytic leukaemia	rs149679123	chr6	7946842	C	T	0.03132	0.2454	0.023765	5.373e-25	0.01317	0.657921	0.128625
TXNDC5	Acute lymphocytic leukaemia	rs149742777	chr6	7909587	A	T	0.01536	0.5369	0.032627	7.611e-61	0.00561181	0.966102	0.170468
TXNDC5	Acute lymphocytic leukaemia	rs56238200	chr17	82398802	A	G	0.35087	0.1296	0.008598	2.453e-51	0.319294	0.100309	0.336022
TXNDC5	Acute lymphocytic leukaemia	rs6796	chr7	6462736	C	T	0.23682	0.0557	0.009576	6.013e-09	0.322084	-0.101563	0.331259
DNAJB9	Acute lymphocytic leukaemia	rs111481700	chr17	66690649	A	G	0.03073	0.1328	0.023815	2.457e-08	0.0289849	-0.3386	0.248572
DNAJB9	Acute lymphocytic leukaemia	rs112963922	chr14	94411531	T	C	0.01119	0.3596	0.038447	8.513e-21	0.0313888	-0.255379	0.360445
DNAJB9	Acute lymphocytic leukaemia	rs147800199	chr7	108229176	C	T	0.01737	-0.2242	0.030878	3.845e-13	0.00629801	-0.704649	0.2407
DNAJB9	Acute lymphocytic leukaemia	rs17580	chr14	94380925	A	T	0.03316	0.1396	0.023086	1.475e-09	0.00915828	-0.00435212	0.993104
DNAJB9	Acute lymphocytic leukaemia	rs188302747	chr6	32265199	G	C	0.0349	0.1577	0.022339	1.674e-12	0.0149502	0.0576511	0.884007
DNAJB9	Acute lymphocytic leukaemia	rs28487964	chr15	44492177	A	T	0.03706	0.1279	0.021547	2.925e-09	0.0156546	-0.259374	0.509088
DNAJB9	Acute lymphocytic leukaemia	rs3130955	chr6	31086734	A	C	0.31795	0.0627	0.008825	1.205e-12	0.340702	0.107599	0.289434
DNAJB9	Acute lymphocytic leukaemia	rs4788808	chr16	71581710	T	C	0.42851	0.0661	0.008283	1.459e-15	0.579027	0.150235	0.127954
DNAJB9	Acute lymphocytic leukaemia	rs72613567	chr4	87310240	TA	T	0.29348	0.0607	0.009004	1.566e-11	0.217952	-0.0235011	0.841439
DNAJB9	Acute lymphocytic leukaemia	rs73394251	chr6	31379831	A	G	0.09882	0.0828	0.013663	1.359e-09	0.153286	-0.257214	0.05815
DNAJB9	Acute lymphocytic leukaemia	rs8178824	chr17	66228657	T	C	0.01066	0.6134	0.039522	2.526e-54	0.00972947	-0.507999	0.315668
DNAJB9	Acute lymphocytic leukaemia	rs9302635	chr16	72110275	C	T	0.19843	-0.1189	0.010176	1.524e-31	0.175732	0.0964025	0.447259
CDH15	Acute lymphocytic leukaemia	rs113567935	chr3	51737171	C	T	0.02079	-0.2968	0.028661	3.95e-25	0.00415536	-1.01721	0.190654
CDH15	Acute lymphocytic leukaemia	rs114704096	chr3	46916919	T	C	0.02973	-0.2179	0.023966	9.72e-20	0.0151267	-0.706634	0.0788896
CDH15	Acute lymphocytic leukaemia	rs115881877	chr3	43891240	T	C	0.01887	-0.2449	0.029257	5.735e-17	0.0157124	0.464482	0.231437
CDH15	Acute lymphocytic leukaemia	rs116347702	chr3	53024443	C	A	0.03344	-0.2964	0.022729	7.206e-39	0.0471146	-0.122254	0.595088
CDH15	Acute lymphocytic leukaemia	rs116749582	chr3	55895022	T	C	0.01257	-0.3185	0.037512	2.054e-17	0.00157331	-1.14871	0.410303
CDH15	Acute lymphocytic leukaemia	rs11716402	chr3	52879923	T	C	0.02187	0.1606	0.027652	6.325e-09	0.0136206	-0.105592	0.803734
CDH15	Acute lymphocytic leukaemia	rs147408433	chr3	55133006	T	C	0.01879	-0.1832	0.029598	6.028e-10	0.00405789	-0.521333	0.487614
CDH15	Acute lymphocytic leukaemia	rs16959006	chr17	66247846	G	C	0.05129	0.1925	0.018603	4.273e-25	0.0766463	-0.0374519	0.835968
CDH15	Acute lymphocytic leukaemia	rs2281721	chr1	230161390	T	C	0.36803	-0.0826	0.008418	9.962e-23	0.560189	0.0312204	0.750127
CDH15	Acute lymphocytic leukaemia	rs7302925	chr12	56467674	G	A	0.15474	0.0638	0.011149	1.051e-08	0.810836	0.243525	0.0499183
CDH15	Acute lymphocytic leukaemia	rs73069835	chr3	40848996	T	C	0.01215	-0.2249	0.035304	1.885e-10	0.00626779	0.588131	0.393756
CDH15	Acute lymphocytic leukaemia	rs75097760	chr3	52780627	T	C	0.0166	-0.5074	0.032422	3.334e-55	0.0171758	0.135949	0.720795
CDH15	Acute lymphocytic leukaemia	rs79020595	chr3	53612967	A	G	0.02087	-0.2059	0.028581	5.84e-13	0.0227504	-0.135407	0.687804
TPMT	Acute lymphocytic leukaemia	rs10096633	chr8	19973410	T	C	0.09986	-0.0855	0.013359	1.552e-10	0.0968354	-0.0376493	0.819122
TPMT	Acute lymphocytic leukaemia	rs10822155	chr10	63311455	A	C	0.43479	0.0656	0.008088	5.044e-16	0.38431	-0.129449	0.193767
TPMT	Acute lymphocytic leukaemia	rs12995461	chr2	27555300	C	A	0.21643	0.0605	0.009676	4.036e-10	0.279266	-0.077543	0.474446
TPMT	Acute lymphocytic leukaemia	rs1355538	chr3	165787389	G	A	0.39847	-0.0816	0.008184	2.041e-23	0.672107	-0.150672	0.144439
TPMT	Acute lymphocytic leukaemia	rs261290	chr15	58386521	C	T	0.36352	-0.047	0.008361	1.898e-08	0.619393	-0.146879	0.141913
TPMT	Acute lymphocytic leukaemia	rs28374650	chr6	32655590	T	C	0.29732	0.0498	0.008725	1.146e-08	0.339979	-0.0414637	0.687942
TPMT	Acute lymphocytic leukaemia	rs3816117	chr16	56962246	C	T	0.49421	-0.067	0.008033	7.408e-17	0.49925	-0.107295	0.267961
TPMT	Acute lymphocytic leukaemia	rs6993770	chr8	105569300	T	A	0.22448	-0.0778	0.009649	7.453e-16	0.223119	0.0374289	0.74915
TPMT	Acute lymphocytic leukaemia	rs775824	chr19	55050202	C	T	0.16338	0.0729	0.010843	1.781e-11	0.881512	0.461661	0.00406172
TPMT	Acute lymphocytic leukaemia	rs9332701	chr1	169515529	G	A	0.07189	0.3568	0.015367	2.964e-119	0.0426499	-0.283399	0.243415
TPMT	Acute lymphocytic leukaemia	rs964184	chr11	116778201	C	G	0.12321	-0.1174	0.012153	4.456e-22	0.855465	0.186323	0.176306
FGFBP3	Acute lymphocytic leukaemia	rs11186737	chr10	91906592	T	C	0.26326	-0.2914	0.009057	1e-200	0.276435	-0.0815905	0.451699
FGFBP3	Acute lymphocytic leukaemia	rs11190377	chr10	100039544	C	T	0.37635	-0.099	0.008309	9.882e-33	0.293165	-0.0431067	0.688738
FGFBP3	Acute lymphocytic leukaemia	rs12640189	chr4	6891454	T	C	0.18646	0.0595	0.010363	9.376e-09	0.187821	-0.00229296	0.98535
FGFBP3	Acute lymphocytic leukaemia	rs13077145	chr3	194343637	C	G	0.26454	-0.0563	0.009131	7.017e-10	0.267737	-0.0756508	0.493708
FGFBP3	Acute lymphocytic leukaemia	rs2209972	chr10	92419271	T	C	0.32527	0.0685	0.008603	1.691e-15	0.329555	0.0559069	0.587917
FGFBP3	Acute lymphocytic leukaemia	rs35769183	chr10	93328017	A	G	0.33656	-0.0548	0.008579	1.684e-10	0.335998	-0.147958	0.149075
FGFBP3	Acute lymphocytic leukaemia	rs3758538	chr10	93602293	G	T	0.1384	0.064	0.01166	4.045e-08	0.104516	0.0742492	0.645098
FGFBP3	Acute lymphocytic leukaemia	rs599839	chr1	109279544	A	G	0.20777	0.0747	0.009894	4.36e-14	0.781053	0.0575024	0.622326
FGFBP3	Acute lymphocytic leukaemia	rs61269268	chr14	91775008	C	A	0.20448	-0.0609	0.009951	9.368e-10	0.230228	0.0858507	0.456842
FGFBP3	Acute lymphocytic leukaemia	rs77542162	chr17	69085137	G	A	0.025	0.1662	0.025238	4.541e-11	0.00669976	0.215206	0.715155
TMEM154	Acute lymphocytic leukaemia	rs1591734	chr1	169302664	T	C	0.1303	-0.0803	0.011841	1.191e-11	0.0988384	0.168678	0.297611
TMEM154	Acute lymphocytic leukaemia	rs184924341	chr10	20198402	G	T	0.01192	0.1985	0.035262	1.81e-08	0.00340313	1.03782	0.211793
TMEM154	Acute lymphocytic leukaemia	rs2239853	chr1	169556528	C	T	0.44202	-0.0831	0.007981	2.17e-25	0.613273	0.0375891	0.708035
TMEM154	Acute lymphocytic leukaemia	rs2276815	chr3	52819731	G	C	0.26822	-0.0607	0.008921	1.014e-11	0.286832	-0.0267314	0.802448
TMEM154	Acute lymphocytic leukaemia	rs3130511	chr6	31209171	T	C	0.22798	0.0564	0.009442	2.321e-09	0.200711	-0.0388685	0.74691
TMEM154	Acute lymphocytic leukaemia	rs6544941	chr2	46947977	A	G	0.33068	-0.0465	0.008409	3.205e-08	0.660186	0.217261	0.0348225
TMEM154	Acute lymphocytic leukaemia	rs78334957	chr10	19819940	C	T	0.13736	0.0657	0.011523	1.187e-08	0.0995373	-0.00232624	0.988593
TMEM154	Acute lymphocytic leukaemia	rs927826	chr10	19931917	T	G	0.29793	0.0914	0.008655	4.575e-26	0.771577	0.0360593	0.755906
TMEM154	Acute lymphocytic leukaemia	rs9332701	chr1	169515529	G	A	0.07189	-0.1696	0.01518	5.574e-29	0.0426499	-0.283399	0.243415
UBE3A	Acute lymphocytic leukaemia	rs1354034	chr3	56815721	C	T	0.38119	0.0574	0.008301	4.684e-12	0.704977	-0.125325	0.242803
UBE3A	Acute lymphocytic leukaemia	rs1355538	chr3	165787389	G	A	0.39847	-0.0453	0.008224	3.627e-08	0.672107	-0.150672	0.144439
UBE3A	Acute lymphocytic leukaemia	rs4980320	chr11	198986	C	T	0.46986	0.0516	0.008094	1.826e-10	0.479149	0.0357157	0.716015
RIC3	Acute lymphocytic leukaemia	rs12403425	chr1	197845693	A	C	0.2662	0.0491	0.008986	4.658e-08	0.177989	-0.127008	0.315479
RIC3	Acute lymphocytic leukaemia	rs1355538	chr3	165787389	G	A	0.39847	-0.0785	0.008109	3.634e-22	0.672107	-0.150672	0.144439
RIC3	Acute lymphocytic leukaemia	rs453821	chr6	31967534	T	C	0.13894	0.1251	0.011454	9.063e-28	0.0767268	0.0746322	0.686005
RIC3	Acute lymphocytic leukaemia	rs704	chr17	28367840	A	G	0.49189	0.0509	0.007959	1.601e-10	0.419906	-0.192181	0.050501
RIC3	Acute lymphocytic leukaemia	rs941758	chr4	73853224	A	C	0.28938	-0.0481	0.008735	3.664e-08	0.707942	0.0638499	0.546991
PCOLCE	Acute lymphocytic leukaemia	rs13379042	chr14	73783397	C	T	0.24178	-0.0599	0.009467	2.501e-10	0.198096	0.0208285	0.864492
PCOLCE	Acute lymphocytic leukaemia	rs142931061	chr15	41314802	C	T	0.01604	-0.1762	0.032265	4.734e-08	0.0288898	0.379649	0.20361
PCOLCE	Acute lymphocytic leukaemia	rs150844304	chr15	43434427	C	A	0.0276	-0.243	0.024666	6.754e-23	0.00468563	-0.542002	0.432122
PCOLCE	Acute lymphocytic leukaemia	rs339969	chr15	60591082	A	C	0.33988	-0.0575	0.008542	1.683e-11	0.72123	0.166322	0.12643
PCOLCE	Acute lymphocytic leukaemia	rs55649657	chr7	21567665	G	C	0.20466	-0.0728	0.010047	4.285e-13	0.215448	0.193304	0.102895
PCOLCE	Acute lymphocytic leukaemia	rs704	chr17	28367840	A	G	0.49189	-0.0455	0.008112	2.035e-08	0.419906	-0.192181	0.050501
PCOLCE	Acute lymphocytic leukaemia	rs7385804	chr7	100638347	A	C	0.3515	0.1606	0.008553	1.18e-78	0.55146	-0.0436569	0.654252
PCOLCE	Acute lymphocytic leukaemia	rs7671124	chr4	23921257	A	G	0.35153	-0.0477	0.008582	2.725e-08	0.654366	-0.0967637	0.346739
TMPRSS6	Acute lymphocytic leukaemia	rs111265231	chr17	14360389	T	C	0.07157	0.1099	0.016185	1.119e-11	0.0691938	-0.36682	0.0586908
TMPRSS6	Acute lymphocytic leukaemia	rs117348742	chr17	28414292	C	T	0.01221	-0.48	0.037808	6.233e-37	0.00826802	-0.44021	0.412367
TMPRSS6	Acute lymphocytic leukaemia	rs117451747	chr17	28395871	G	A	0.02581	0.4604	0.025655	5.156e-72	0.0278816	-0.246538	0.406213
TMPRSS6	Acute lymphocytic leukaemia	rs12478841	chr2	27588855	G	A	0.21569	0.0608	0.008977	1.262e-11	0.279299	-0.0775535	0.474464
TMPRSS6	Acute lymphocytic leukaemia	rs137940962	chr17	31642390	T	C	0.04516	0.1537	0.020308	3.782e-14	0.0311897	-0.119777	0.667501
TMPRSS6	Acute lymphocytic leukaemia	rs140390732	chr17	27292324	A	C	0.01316	-0.3479	0.036795	3.225e-21	0.00203534	2.49484	0.020985
TMPRSS6	Acute lymphocytic leukaemia	rs140431012	chr3	124755083	G	A	0.09594	-0.071	0.012597	1.739e-08	0.103681	0.0184433	0.908065
TMPRSS6	Acute lymphocytic leukaemia	rs142216432	chr17	29539856	A	G	0.02132	-0.2357	0.029041	4.813e-16	0.00792056	-0.100965	0.856585
TMPRSS6	Acute lymphocytic leukaemia	rs144924964	chr17	28093061	A	G	0.09574	-0.4301	0.01409	1e-200	0.0891212	0.160441	0.345785
TMPRSS6	Acute lymphocytic leukaemia	rs147804221	chr17	15132253	T	C	0.02403	-0.2165	0.027105	1.378e-15	0.0269278	0.134324	0.660106
TMPRSS6	Acute lymphocytic leukaemia	rs16964261	chr17	28416775	C	T	0.05153	-0.5032	0.019051	9.695e-154	0.0308111	0.105247	0.713066
TMPRSS6	Acute lymphocytic leukaemia	rs190324353	chr17	15380062	G	T	0.01217	0.2395	0.037733	2.193e-10	0.0201098	0.628676	0.0679876
TMPRSS6	Acute lymphocytic leukaemia	rs2004584	chr17	27581275	T	C	0.14725	0.2037	0.011883	7.212e-66	0.139984	-0.110394	0.430365
TMPRSS6	Acute lymphocytic leukaemia	rs201234732	chr17	15636023	A	G	0.01204	0.3222	0.039906	6.801e-16	0.00138723	1.08516	0.460903
TMPRSS6	Acute lymphocytic leukaemia	rs4239214	chr17	28000866	A	G	0.09756	0.4948	0.014013	1e-200	0.0533588	-0.314166	0.148298
TMPRSS6	Acute lymphocytic leukaemia	rs56210800	chr3	124753745	G	C	0.09593	-0.0708	0.012597	1.907e-08	0.103681	0.0184183	0.908188
TMPRSS6	Acute lymphocytic leukaemia	rs78119120	chr17	30381853	A	G	0.01409	0.3426	0.035222	2.317e-22	0.00732437	-0.0652038	0.90792
ASL	Acute lymphocytic leukaemia	rs10950053	chr7	66848890	A	T	0.18497	-0.1399	0.010587	7.311e-40	0.723935	-0.00939404	0.93141
ASL	Acute lymphocytic leukaemia	rs111439465	chr7	66714711	A	G	0.02068	-0.3172	0.029266	2.264e-27	0.0115571	0.464917	0.314486
ASL	Acute lymphocytic leukaemia	rs137996846	chr7	53522215	A	T	0.01689	-0.2396	0.032372	1.346e-13	0.0258698	0.046916	0.881297
ASL	Acute lymphocytic leukaemia	rs139112016	chr7	54418653	A	G	0.01018	-0.3779	0.041437	7.515e-20	0.0193536	0.00281188	0.993405
ASL	Acute lymphocytic leukaemia	rs28601761	chr8	125487789	G	C	0.42975	-0.0476	0.008337	1.133e-08	0.410899	-0.0523278	0.596317
ASL	Acute lymphocytic leukaemia	rs3747207	chr22	43928975	A	G	0.22927	0.0718	0.009779	2.1e-13	0.226987	0.0434291	0.709227
ASL	Acute lymphocytic leukaemia	rs4753123	chr11	94075453	T	C	0.13055	-0.0755	0.012225	6.583e-10	0.139421	0.0225409	0.872522
ASL	Acute lymphocytic leukaemia	rs73134721	chr7	64614109	T	G	0.01513	-0.3453	0.033332	3.795e-25	0.00450824	0.672088	0.375529
TGM1	Acute lymphocytic leukaemia	rs572515	chr1	196677131	G	A	0.3973	-0.0508	0.007987	2.011e-10	0.561231	-0.00508186	0.95827
TGM1	Acute lymphocytic leukaemia	rs601020	chr6	32605402	A	G	0.27605	0.0531	0.008735	1.211e-09	0.244423	0.133403	0.238532
TGM1	Acute lymphocytic leukaemia	rs974472	chr14	106120493	T	G	0.43862	-0.0612	0.008003	2.05e-14	0.572255	-0.0638469	0.528046
ADGRF1	Acute lymphocytic leukaemia	rs1355538	chr3	165787389	G	A	0.39847	-0.062	0.008169	3.212e-14	0.672107	-0.150672	0.144439
ADGRF1	Acute lymphocytic leukaemia	rs142820745	chr17	33099255	A	G	0.02926	-0.1308	0.023931	4.612e-08	0.036987	0.160587	0.533278
ADGRF1	Acute lymphocytic leukaemia	rs35136575	chr19	44935906	G	C	0.28501	-0.0715	0.00888	8.141e-16	0.257643	0.126761	0.254116
ADGRF1	Acute lymphocytic leukaemia	rs429358	chr19	44908684	C	T	0.17407	0.1039	0.010667	2.022e-22	0.183691	-0.00543693	0.965377
ADGRF1	Acute lymphocytic leukaemia	rs62269916	chr3	74348841	A	G	0.03471	0.1273	0.021973	6.896e-09	0.0311729	-0.0211582	0.941117
ADGRF1	Acute lymphocytic leukaemia	rs704	chr17	28367840	A	G	0.49189	0.1466	0.008001	5.385e-75	0.419906	-0.192181	0.050501
NAGS	Acute lymphocytic leukaemia	rs10922098	chr1	196695521	T	C	0.40011	-0.1173	0.008092	1.291e-47	0.561049	-0.00464965	0.961802
NAGS	Acute lymphocytic leukaemia	rs6445035	chr3	165762312	A	G	0.1904	0.0723	0.010084	7.503e-13	0.176283	0.234745	0.0632135
NAGS	Acute lymphocytic leukaemia	rs7774739	chr6	32041524	G	A	0.17585	0.0713	0.011072	1.196e-10	0.00283685	-0.0834957	0.932347
UROS	Acute lymphocytic leukaemia	rs11244609	chr10	125691882	G	A	0.06047	-0.0934	0.017086	4.589e-08	0.045963	-0.222634	0.354812
UROS	Acute lymphocytic leukaemia	rs12765966	chr10	125609040	T	C	0.26825	-0.0677	0.009276	2.919e-13	0.219769	0.0759392	0.520552
UROS	Acute lymphocytic leukaemia	rs1935451	chr10	125816857	A	G	0.11027	-0.2956	0.013006	2.33e-114	0.908947	-0.294025	0.0825962
UROS	Acute lymphocytic leukaemia	rs3811444	chr1	247876149	T	C	0.34232	-0.0507	0.00871	5.861e-09	0.347116	-0.0406718	0.691587
UROS	Acute lymphocytic leukaemia	rs57467915	chr2	219216694	A	G	0.01702	0.3571	0.030889	6.521e-31	0.0178072	0.283916	0.432331
UROS	Acute lymphocytic leukaemia	rs6597746	chr10	126207193	A	G	0.16283	-0.0703	0.011093	2.337e-10	0.824672	0.175715	0.169761
PAPLN	Acute lymphocytic leukaemia	rs1056429	chr6	31354106	A	G	0.14978	0.0611	0.011025	2.993e-08	0.177888	0.153574	0.223452
PAPLN	Acute lymphocytic leukaemia	rs10922098	chr1	196695521	T	C	0.40011	-0.0948	0.008073	7.734e-32	0.561049	-0.00464965	0.961802
PAPLN	Acute lymphocytic leukaemia	rs1355538	chr3	165787389	G	A	0.39847	-0.0575	0.008066	1.016e-12	0.672107	-0.150672	0.144439
PAPLN	Acute lymphocytic leukaemia	rs6542680	chr2	3592552	T	C	0.18362	-0.0572	0.010243	2.349e-08	0.648336	-0.149514	0.147278
QDPR	Acute lymphocytic leukaemia	rs1354034	chr3	56815721	C	T	0.38119	0.0459	0.008303	3.24e-08	0.704977	-0.125325	0.242803
QDPR	Acute lymphocytic leukaemia	rs3822233	chr4	17509724	A	G	0.27499	-0.3944	0.007528	1e-200	0.234295	-0.165203	0.152657
QDPR	Acute lymphocytic leukaemia	rs56320400	chr4	17381231	G	A	0.03337	0.1359	0.022581	1.763e-09	0.0258148	0.120705	0.699309
QDPR	Acute lymphocytic leukaemia	rs75218392	chr4	17400926	G	A	0.04573	-0.2005	0.019459	6.796e-25	0.0583511	-0.233363	0.256403
QDPR	Acute lymphocytic leukaemia	rs79442348	chr4	21481318	T	C	0.04	-0.12	0.02056	5.327e-09	0.0402059	-0.0230859	0.925151
MADCAM1	Acute lymphocytic leukaemia	rs1706435	chr3	165743688	G	A	0.36981	0.0664	0.008308	1.328e-15	0.311721	0.153164	0.141768
MADCAM1	Acute lymphocytic leukaemia	rs62269916	chr3	74348841	A	G	0.03471	0.1238	0.02203	1.913e-08	0.0311729	-0.0211582	0.941117
MADCAM1	Acute lymphocytic leukaemia	rs6993770	chr8	105569300	T	A	0.22448	-0.0581	0.009656	1.776e-09	0.223119	0.0374289	0.74915
SUN5	Acute lymphocytic leukaemia	rs115378853	chr3	183190471	A	T	0.01622	0.2108	0.032489	8.68e-11	0.0302088	0.329602	0.249376
SUN5	Acute lymphocytic leukaemia	rs11574452	chr4	73980944	A	C	0.02727	-0.1597	0.025449	3.489e-10	0.0353478	-0.490279	0.0645342
SUN5	Acute lymphocytic leukaemia	rs116115132	chr3	187310840	T	C	0.01553	0.2632	0.033241	2.417e-15	0.0116167	0.1604	0.731211
SUN5	Acute lymphocytic leukaemia	rs1398015	chr4	73891519	T	C	0.05914	-0.1016	0.017303	4.309e-09	0.0823312	0.0828648	0.638064
SUN5	Acute lymphocytic leukaemia	rs368465	chr1	196702851	C	T	0.39961	-0.1075	0.008246	7.526e-39	0.560966	-0.00452725	0.962808
SUN5	Acute lymphocytic leukaemia	rs7073753	chr10	63303060	T	C	0.4356	0.0669	0.008139	2.043e-16	0.384205	-0.129169	0.194742
TRABD	Acute lymphocytic leukaemia	rs12478841	chr2	27588855	G	A	0.21569	0.0581	0.00954	1.127e-09	0.279299	-0.0775535	0.474464
TRABD	Acute lymphocytic leukaemia	rs1707652	chr3	165761011	T	C	0.3102	0.0698	0.008527	2.696e-16	0.248628	0.196937	0.0791043
TRABD	Acute lymphocytic leukaemia	rs4713488	chr6	31794534	C	T	0.04665	0.1037	0.018797	3.453e-08	0.0277223	-0.297838	0.320114
TRABD	Acute lymphocytic leukaemia	rs71352239	chr19	44926286	T	C	0.30263	0.0739	0.008626	1.062e-17	0.304617	-0.0359426	0.738919
TRABD	Acute lymphocytic leukaemia	rs964184	chr11	116778201	C	G	0.12321	-0.0716	0.011966	2.18e-09	0.855465	0.186323	0.176306
CASQ1	Acute lymphocytic leukaemia	rs117827303	chr12	7123080	T	C	0.03794	0.1302	0.021045	6.146e-10	0.016141	0.574781	0.129121
CASQ1	Acute lymphocytic leukaemia	rs11838267	chr12	7068568	C	T	0.11963	0.2003	0.012776	2.125e-55	0.17896	-0.0407567	0.746495
CASQ1	Acute lymphocytic leukaemia	rs12100587	chr14	105537986	G	T	0.11567	0.079	0.012984	1.169e-09	0.0697674	0.016047	0.934765
CASQ1	Acute lymphocytic leukaemia	rs1355538	chr3	165787389	G	A	0.39847	-0.072	0.008324	5.181e-18	0.672107	-0.150672	0.144439
CASQ1	Acute lymphocytic leukaemia	rs72713385	chr14	105732642	T	C	0.15427	-0.0975	0.011474	1.937e-17	0.11863	-0.104794	0.495599
CASQ1	Acute lymphocytic leukaemia	rs964184	chr11	116778201	C	G	0.12321	-0.0789	0.01237	1.788e-10	0.855465	0.186323	0.176306
XDH	Acute lymphocytic leukaemia	rs10915471	chr1	4207829	G	T	0.48853	0.046	0.007807	3.809e-09	0.344227	-0.0690413	0.499673
XDH	Acute lymphocytic leukaemia	rs10922098	chr1	196695521	T	C	0.40011	-0.0435	0.007938	4.259e-08	0.561049	-0.00464965	0.961802
XDH	Acute lymphocytic leukaemia	rs2753516	chr14	105875946	C	G	0.34754	-0.0467	0.008383	2.531e-08	0.326961	-0.102512	0.355831
SELPLG	Acute lymphocytic leukaemia	rs11162091	chr1	76160847	C	T	0.38701	-0.0493	0.008592	9.597e-09	0.631359	-0.21542	0.0317037
SELPLG	Acute lymphocytic leukaemia	rs112694524	chr2	43226582	A	G	0.05036	0.1153	0.019313	2.373e-09	0.0333653	0.0741228	0.784506
SELPLG	Acute lymphocytic leukaemia	rs1137654	chr9	98808054	T	A	0.10823	0.1666	0.013313	6.24e-36	0.11685	0.149517	0.322542
SELPLG	Acute lymphocytic leukaemia	rs117549241	chr8	133285599	A	G	0.03499	-0.1377	0.023075	2.411e-09	0.0469972	0.0639082	0.782505
SELPLG	Acute lymphocytic leukaemia	rs12110	chr19	35169605	A	G	0.20101	-0.1056	0.010398	3.121e-24	0.753054	0.00274038	0.980462
SELPLG	Acute lymphocytic leukaemia	rs1251489	chr1	76053016	T	A	0.18409	-0.1908	0.010721	7.434e-71	0.182219	-0.160341	0.202855
SELPLG	Acute lymphocytic leukaemia	rs1260326	chr2	27508073	C	T	0.34132	0.0543	0.008856	8.695e-10	0.650149	0.116298	0.253911
SELPLG	Acute lymphocytic leukaemia	rs1264708	chr6	30089377	G	A	0.28264	0.0538	0.009206	5.097e-09	0.327085	-0.147755	0.155239
SELPLG	Acute lymphocytic leukaemia	rs12945886	chr17	7169695	G	A	0.24063	0.0556	0.009806	1.429e-08	0.31171	-0.177339	0.0937152
SELPLG	Acute lymphocytic leukaemia	rs13205436	chr6	95586174	C	T	0.10488	0.081	0.013619	2.719e-09	0.0602538	-0.00158723	0.993773
SELPLG	Acute lymphocytic leukaemia	rs13282872	chr8	133600778	G	T	0.45175	-0.051	0.008435	1.481e-09	0.392985	-0.202764	0.0413048
SELPLG	Acute lymphocytic leukaemia	rs139803760	chr8	7036258	T	C	0.01844	0.2076	0.032731	2.258e-10	0.00746288	-0.0546303	0.92325
SELPLG	Acute lymphocytic leukaemia	rs2142306	chr8	133458388	C	T	0.43618	-0.1847	0.008412	7.533e-107	0.376024	0.192825	0.0559371
SELPLG	Acute lymphocytic leukaemia	rs2256974	chr6	31587615	A	C	0.23982	0.0586	0.00971	1.589e-09	0.18727	-0.15944	0.198071
SELPLG	Acute lymphocytic leukaemia	rs2595507	chr2	231392153	C	G	0.22103	0.0711	0.01011	2.03e-12	0.288651	0.0703386	0.509448
SELPLG	Acute lymphocytic leukaemia	rs60988380	chr9	33117956	T	C	0.10052	0.0818	0.013685	2.269e-09	0.109898	-0.0102505	0.9474
SELPLG	Acute lymphocytic leukaemia	rs62520288	chr8	133536170	A	G	0.19142	0.2032	0.010751	1.122e-79	0.207199	0.0282265	0.813747
SELPLG	Acute lymphocytic leukaemia	rs66817580	chr21	41317710	T	G	0.14508	-0.0809	0.011852	8.736e-12	0.0957869	-0.137497	0.403583
SELPLG	Acute lymphocytic leukaemia	rs6796	chr7	6462736	C	T	0.23682	0.0807	0.009792	1.704e-16	0.322084	-0.101563	0.331259
SELPLG	Acute lymphocytic leukaemia	rs7298509	chr12	108638368	A	T	0.45158	-0.0833	0.008479	8.828e-23	0.561416	-0.0262394	0.788629
SELPLG	Acute lymphocytic leukaemia	rs73191242	chr12	108620180	A	G	0.2105	-0.2819	0.010228	3.251e-167	0.233492	0.116724	0.310623
SELPLG	Acute lymphocytic leukaemia	rs76428106	chr13	28029870	C	T	0.01359	0.2257	0.036285	4.964e-10	0.0127128	-0.529088	0.215984
SELPLG	Acute lymphocytic leukaemia	rs7814163	chr8	22449277	C	G	0.42161	0.0468	0.008491	3.558e-08	0.380669	-0.0949087	0.345188
CHCHD10	Acute lymphocytic leukaemia	rs1355538	chr3	165787389	G	A	0.39847	-0.0657	0.008026	2.701e-16	0.672107	-0.150672	0.144439
CHCHD10	Acute lymphocytic leukaemia	rs204995	chr6	32186508	G	A	0.18548	0.094	0.010208	3.297e-20	0.151998	-0.00546641	0.967345
CHCHD10	Acute lymphocytic leukaemia	rs71789649	chr6	32666625	A	AAGC	0.14436	0.0905	0.011435	2.486e-15	0.140541	0.0186432	0.892436
GSTT2B	Acute lymphocytic leukaemia	rs1355538	chr3	165787389	G	A	0.39847	-0.045	0.008203	4.114e-08	0.672107	-0.150672	0.144439
GSTT2B	Acute lymphocytic leukaemia	rs140977331	chr22	23746629	A	G	0.01177	0.2316	0.037887	9.781e-10	0.0217183	-0.0463514	0.888904
GSTT2B	Acute lymphocytic leukaemia	rs143467905	chr22	24229687	T	A	0.01126	0.3016	0.038355	3.741e-15	0.0034151	-0.384219	0.655849
GSTT2B	Acute lymphocytic leukaemia	rs4822435	chr22	23738424	C	T	0.1347	0.0736	0.011705	3.217e-10	0.906411	-0.207715	0.226287
GSTT2B	Acute lymphocytic leukaemia	rs5751764	chr22	23907271	C	A	0.44607	-0.2536	0.008028	1e-200	0.636635	-0.0480555	0.633534
LRP1B	Acute lymphocytic leukaemia	rs1329424	chr1	196677046	G	T	0.39735	-0.2783	0.007912	1e-200	0.561252	-0.0051467	0.95774
LRP1B	Acute lymphocytic leukaemia	rs1354034	chr3	56815721	C	T	0.38119	0.0801	0.008051	2.544e-23	0.704977	-0.125325	0.242803
LRP1B	Acute lymphocytic leukaemia	rs35351085	chr1	197992799	T	C	0.04877	0.123	0.018098	1.074e-11	0.0654955	-0.0206492	0.916465
ATF6	Acute lymphocytic leukaemia	rs10918270	chr1	161945711	A	G	0.38885	-0.0493	0.008385	4.115e-09	0.475442	-0.0263059	0.787818
ATF6	Acute lymphocytic leukaemia	rs11164870	chr1	93086630	G	C	0.3995	-0.0952	0.008364	5.128e-30	0.628778	-0.00251737	0.980016
ATF6	Acute lymphocytic leukaemia	rs13107325	chr4	102267552	T	C	0.01596	-0.2032	0.033392	1.163e-09	0.0138562	0.473714	0.245575
ATF6	Acute lymphocytic leukaemia	rs147456212	chr10	15318139	A	G	0.01225	0.2198	0.037563	4.871e-09	0.030313	-0.563189	0.0473293
ATF6	Acute lymphocytic leukaemia	rs149072800	chr1	91980163	C	T	0.03494	0.1341	0.02271	3.528e-09	0.0342253	-0.225882	0.408254
ATF6	Acute lymphocytic leukaemia	rs163279	chr5	16500772	T	C	0.38774	0.0524	0.008425	4.974e-10	0.233287	0.0469606	0.681235
ATF6	Acute lymphocytic leukaemia	rs1794514	chr6	32699696	C	G	0.16783	-0.0881	0.011044	1.497e-15	0.163373	0.0193553	0.882994
ATF6	Acute lymphocytic leukaemia	rs193096844	chr10	15647683	T	C	0.02464	0.1681	0.026621	2.71e-10	0.0149442	-0.240924	0.546871
ATF6	Acute lymphocytic leukaemia	rs2273967	chr1	230279547	T	C	0.24296	0.0953	0.009568	2.281e-23	0.185184	-0.248398	0.0471097
ATF6	Acute lymphocytic leukaemia	rs2583223	chr12	103923063	A	G	0.32004	0.081	0.008771	2.585e-20	0.712334	-0.155331	0.148332
ATF6	Acute lymphocytic leukaemia	rs4796383	chr17	7118971	A	G	0.47118	-0.0477	0.008226	6.685e-09	0.462646	0.0203829	0.835966
ATF6	Acute lymphocytic leukaemia	rs572553	chr4	55394851	A	G	0.39505	0.063	0.008351	4.551e-14	0.373823	-0.00420808	0.966756
ATF6	Acute lymphocytic leukaemia	rs58192144	chr16	4212337	G	C	0.49528	0.0466	0.008205	1.35e-08	0.498305	-0.022901	0.813413
ATF6	Acute lymphocytic leukaemia	rs61738953	chr10	14820083	G	C	0.0401	0.6939	0.021063	1e-200	0.0503694	0.0980043	0.670615
ATF6	Acute lymphocytic leukaemia	rs6500548	chr16	3660536	G	C	0.27307	0.0506	0.009128	2.964e-08	0.730249	0.146755	0.181143
ATF6	Acute lymphocytic leukaemia	rs72706230	chr14	94361316	A	C	0.04535	0.1103	0.019923	3.089e-08	0.025178	0.223154	0.477918
ATF6	Acute lymphocytic leukaemia	rs737908	chr22	29992313	A	G	0.3706	0.066	0.008455	5.914e-15	0.346981	0.0782158	0.442658
ATF6	Acute lymphocytic leukaemia	rs77262773	chr17	69253570	T	C	0.02263	0.1933	0.027131	1.043e-12	0.00634433	0.283045	0.640209
ATF6	Acute lymphocytic leukaemia	rs79688957	chr10	14138082	C	T	0.02868	0.2308	0.02459	6.233e-21	0.0239261	-0.280533	0.369627
ATF6	Acute lymphocytic leukaemia	rs8066387	chr17	18284307	C	T	0.4393	-0.046	0.008258	2.538e-08	0.454752	0.0258506	0.790489
ATF6	Acute lymphocytic leukaemia	rs8176743	chr9	133256028	T	C	0.06488	0.112	0.01668	1.885e-11	0.133188	-0.183597	0.200115
ATF6	Acute lymphocytic leukaemia	rs9333273	chr10	15576891	A	G	0.01641	0.2223	0.032315	6.021e-12	0.00501577	-0.086762	0.899968
ATF6	Acute lymphocytic leukaemia	rs9825233	chr3	12801869	T	C	0.37766	0.0593	0.008466	2.477e-12	0.585226	0.0317348	0.748244
COL11A2	Acute lymphocytic leukaemia	rs10174098	chr2	186628015	A	G	0.27925	-0.0502	0.009085	3.281e-08	0.658682	0.11784	0.250804
COL11A2	Acute lymphocytic leukaemia	rs12194518	chr6	33838172	G	C	0.11174	0.1123	0.013137	1.25e-17	0.102492	0.214835	0.182792
COL11A2	Acute lymphocytic leukaemia	rs12975366	chr19	54255498	C	T	0.4155	-0.0693	0.008283	5.91e-17	0.371137	0.170791	0.0899146
COL11A2	Acute lymphocytic leukaemia	rs148658859	chr6	36243339	C	A	0.03449	0.1422	0.022845	4.826e-10	0.0224007	-0.820557	0.0134899
COL11A2	Acute lymphocytic leukaemia	rs2147161	chr13	42408166	C	A	0.42584	0.0485	0.008277	4.647e-09	0.526968	0.0584582	0.549871
COL11A2	Acute lymphocytic leukaemia	rs2450083	chr8	119051303	C	T	0.45529	0.0459	0.008187	2.064e-08	0.535146	-0.0769311	0.432198
COL11A2	Acute lymphocytic leukaemia	rs271173	chr6	132991083	T	C	0.45174	0.0496	0.008291	2.199e-09	0.476241	0.14251	0.144436
COL11A2	Acute lymphocytic leukaemia	rs3918140	chr6	32980685	A	G	0.04021	0.1491	0.021182	1.936e-12	0.0470109	0.223066	0.332213
COL11A2	Acute lymphocytic leukaemia	rs61729512	chr12	7485173	A	G	0.12561	0.0703	0.012405	1.452e-08	0.151627	-0.132205	0.335985
COL11A2	Acute lymphocytic leukaemia	rs7305932	chr12	7528796	A	T	0.2109	-0.0604	0.010147	2.641e-09	0.821594	-0.0980128	0.442439
COL11A2	Acute lymphocytic leukaemia	rs8051661	chr16	88409532	G	A	0.10739	0.1043	0.013251	3.523e-15	0.0594514	-0.241836	0.239633
COL11A2	Acute lymphocytic leukaemia	rs9963868	chr18	48073063	C	T	0.34617	-0.0585	0.008586	9.552e-12	0.37047	0.096355	0.336192
GAD1	Acute lymphocytic leukaemia	rs10922098	chr1	196695521	T	C	0.40011	-0.1016	0.008091	3.634e-36	0.561049	-0.00464965	0.961802
GAD1	Acute lymphocytic leukaemia	rs147168394	chr6	32466356	A	G	0.03427	0.1227	0.021811	1.849e-08	0.0145294	0.100842	0.802049
GAD1	Acute lymphocytic leukaemia	rs415620	chr6	32041502	C	T	0.16036	0.0711	0.011295	3.075e-10	0.0089701	-0.0536054	0.926839
GAD1	Acute lymphocytic leukaemia	rs7774739	chr6	32041524	G	A	0.17585	0.0627	0.011068	1.47e-08	0.00283685	-0.0834957	0.932347
GRB7	Acute lymphocytic leukaemia	rs1047286	chr19	6713251	A	G	0.24066	-0.0639	0.009351	8.276e-12	0.174618	0.0768747	0.545999
GRB7	Acute lymphocytic leukaemia	rs10922098	chr1	196695521	T	C	0.40011	-0.2326	0.008117	1.394e-180	0.561049	-0.00464965	0.961802
GRB7	Acute lymphocytic leukaemia	rs111696008	chr2	216622986	A	G	0.02443	-0.1449	0.026572	4.949e-08	0.0147953	-0.259231	0.513244
GRB7	Acute lymphocytic leukaemia	rs144704969	chr1	196158214	T	C	0.04536	0.1057	0.019103	3.144e-08	0.120976	-0.251426	0.0920428
GRB7	Acute lymphocytic leukaemia	rs1707652	chr3	165761011	T	C	0.3102	0.1085	0.008619	2.457e-36	0.248628	0.196937	0.0791043
GRB7	Acute lymphocytic leukaemia	rs444921	chr6	31964400	T	C	0.13897	0.1727	0.011508	6.553e-51	0.0767023	0.074568	0.686358
GRB7	Acute lymphocytic leukaemia	rs555007	chr6	31882555	C	T	0.07832	0.15	0.014893	7.345e-24	0.158514	-0.179443	0.177966
GRB7	Acute lymphocytic leukaemia	rs704	chr17	28367840	A	G	0.49189	0.0825	0.008005	6.574e-25	0.419906	-0.192181	0.050501
DCAF5	Acute lymphocytic leukaemia	rs10922098	chr1	196695521	T	C	0.40011	-0.1637	0.008054	7.585e-92	0.561049	-0.00464965	0.961802
DCAF5	Acute lymphocytic leukaemia	rs11569415	chr19	6716268	A	G	0.24276	-0.0512	0.00918	2.443e-08	0.185009	0.117832	0.344104
DCAF5	Acute lymphocytic leukaemia	rs1707652	chr3	165761011	T	C	0.3102	0.077	0.00853	1.77e-19	0.248628	0.196937	0.0791043
DCAF5	Acute lymphocytic leukaemia	rs2075798	chr6	31878964	A	C	0.0783	0.0995	0.014736	1.455e-11	0.158127	-0.176805	0.184641
DCAF5	Acute lymphocytic leukaemia	rs550671	chr6	31976816	T	C	0.14045	0.1163	0.011355	1.287e-24	0.0767293	0.074595	0.686148
CYB5A	Acute lymphocytic leukaemia	rs11645522	chr16	80469448	A	G	0.19819	0.058	0.00991	4.83e-09	0.115248	0.0841424	0.585266
CYB5A	Acute lymphocytic leukaemia	rs17806420	chr18	74316132	T	C	0.19046	-0.1014	0.01007	7.542e-24	0.228613	-0.0105928	0.927208
CYB5A	Acute lymphocytic leukaemia	rs7669911	chr4	145868333	T	C	0.16277	0.0607	0.010646	1.186e-08	0.173252	0.0281233	0.825943
NT5C2	Acute lymphocytic leukaemia	rs1354034	chr3	56815721	C	T	0.38119	0.0506	0.008253	8.713e-10	0.704977	-0.125325	0.242803
NT5C2	Acute lymphocytic leukaemia	rs2073340	chr10	103783998	G	C	0.19766	-0.0607	0.010063	1.619e-09	0.800087	-0.102862	0.39977
NT5C2	Acute lymphocytic leukaemia	rs342200	chr7	106676033	A	G	0.42559	-0.0455	0.008085	1.825e-08	0.928885	-0.0350435	0.853556
NT5C2	Acute lymphocytic leukaemia	rs4919682	chr10	102824573	T	C	0.27588	0.1203	0.008959	4.147e-41	0.280573	-0.0922574	0.393307
SCARA3	Acute lymphocytic leukaemia	rs10922098	chr1	196695521	T	C	0.40011	-0.2228	0.008127	1.766e-165	0.561049	-0.00464965	0.961802
SCARA3	Acute lymphocytic leukaemia	rs1451915	chr1	196058002	A	C	0.13641	0.0705	0.011627	1.332e-09	0.103898	0.0553784	0.73219
SCARA3	Acute lymphocytic leukaemia	rs1707652	chr3	165761011	T	C	0.3102	0.0988	0.00863	2.383e-30	0.248628	0.196937	0.0791043
SCARA3	Acute lymphocytic leukaemia	rs6542680	chr2	3592552	T	C	0.18362	-0.099	0.010354	1.161e-21	0.648336	-0.149514	0.147278
SCARA3	Acute lymphocytic leukaemia	rs7535557	chr1	198065844	A	G	0.14655	0.0715	0.01132	2.682e-10	0.207503	0.147896	0.219761
SCARA3	Acute lymphocytic leukaemia	rs7774739	chr6	32041524	G	A	0.17585	0.1407	0.011166	2.105e-36	0.00283685	-0.0834957	0.932347
LRRN1	Acute lymphocytic leukaemia	rs10411127	chr19	43099301	C	T	0.07796	0.1496	0.017397	8.037e-18	0.0796906	0.175274	0.344328
LRRN1	Acute lymphocytic leukaemia	rs10922098	chr1	196695521	T	C	0.40011	-0.0771	0.008807	2.056e-18	0.561049	-0.00464965	0.961802
LRRN1	Acute lymphocytic leukaemia	rs11720167	chr3	165768357	G	T	0.19032	0.134	0.010955	2.099e-34	0.17406	0.236308	0.062939
LRRN1	Acute lymphocytic leukaemia	rs140776740	chr19	42919614	T	G	0.03193	0.2315	0.02625	1.156e-18	0.0152905	0.273367	0.516393
LRRN1	Acute lymphocytic leukaemia	rs147442832	chr19	45465204	A	G	0.02855	0.2651	0.028037	3.215e-21	0.00348217	-1.04255	0.206519
LRRN1	Acute lymphocytic leukaemia	rs3863087	chr3	165792099	A	G	0.09559	-0.1075	0.014906	5.516e-13	0.910319	-0.364013	0.0122752
LRRN1	Acute lymphocytic leukaemia	rs405509	chr19	44905579	G	T	0.49396	-0.2356	0.009193	7.155e-145	0.553527	-0.0139959	0.886371
LRRN1	Acute lymphocytic leukaemia	rs55923289	chr19	44737327	C	T	0.17219	0.3732	0.012107	1e-200	0.161644	0.443984	9.38015e-05
LRRN1	Acute lymphocytic leukaemia	rs6859	chr19	44878777	G	A	0.42659	-0.2815	0.009267	1e-200	0.515228	-0.11857	0.222636
TNR	Acute lymphocytic leukaemia	rs10151220	chr14	34246259	C	T	0.37642	0.0483	0.008346	7.151e-09	0.6605	-0.0301079	0.770183
TNR	Acute lymphocytic leukaemia	rs10922098	chr1	196695521	T	C	0.40011	-0.1577	0.008249	1.786e-81	0.561049	-0.00464965	0.961802
TNR	Acute lymphocytic leukaemia	rs11720167	chr3	165768357	G	T	0.19032	0.1015	0.010287	5.807e-23	0.17406	0.236308	0.062939
TNR	Acute lymphocytic leukaemia	rs1265941	chr6	31904575	C	A	0.07271	0.1303	0.015565	5.695e-17	0.151525	-0.170495	0.20855
TNR	Acute lymphocytic leukaemia	rs2235256	chr1	175599911	G	A	0.4708	-0.1315	0.008083	1.667e-59	0.492243	0.0121724	0.900549
TNR	Acute lymphocytic leukaemia	rs2636882	chr9	114334462	C	T	0.37525	0.0513	0.008278	5.744e-10	0.662164	0.0741631	0.475524
TNR	Acute lymphocytic leukaemia	rs35166255	chr11	126431861	A	G	0.0367	0.1279	0.020814	7.994e-10	0.0350316	0.271456	0.308075
TNR	Acute lymphocytic leukaemia	rs3817428	chr15	88872016	G	C	0.28422	0.06	0.009003	2.661e-11	0.314556	0.28263	0.00349623
TNR	Acute lymphocytic leukaemia	rs3863087	chr3	165792099	A	G	0.09559	-0.083	0.013989	2.97e-09	0.910319	-0.364013	0.0122752
TNR	Acute lymphocytic leukaemia	rs550671	chr6	31976816	T	C	0.14045	0.1347	0.011623	4.676e-31	0.0767293	0.074595	0.686148
TNR	Acute lymphocytic leukaemia	rs704	chr17	28367840	A	G	0.49189	0.1034	0.008097	2.428e-37	0.419906	-0.192181	0.050501
WWP1	Acute lymphocytic leukaemia	rs10876550	chr12	54318524	A	G	0.43699	0.0515	0.008173	2.95e-10	0.677995	0.0442492	0.67157
WWP1	Acute lymphocytic leukaemia	rs1354034	chr3	56815721	C	T	0.38119	0.0891	0.00832	9.186e-27	0.704977	-0.125325	0.242803
WWP1	Acute lymphocytic leukaemia	rs342292	chr7	106730198	G	C	0.45188	-0.0549	0.008101	1.226e-11	0.481758	-8.32414e-05	0.999317
WWP1	Acute lymphocytic leukaemia	rs4980320	chr11	198986	C	T	0.46986	0.06	0.008105	1.336e-13	0.479149	0.0357157	0.716015
WWP1	Acute lymphocytic leukaemia	rs7073753	chr10	63303060	T	C	0.4356	0.0455	0.008157	2.431e-08	0.384205	-0.129169	0.194742
CREB3L4	Acute lymphocytic leukaemia	rs111876947	chr6	32993902	G	A	0.03736	0.2549	0.021338	6.832e-33	0.0305648	0.12864	0.645769
CREB3L4	Acute lymphocytic leukaemia	rs115100599	chr6	33255411	A	G	0.02845	0.1992	0.024146	1.585e-16	0.0242213	-0.537183	0.0906525
CREB3L4	Acute lymphocytic leukaemia	rs138678612	chr6	30964446	G	A	0.03249	0.7583	0.022383	1e-200	0.0150631	-0.677434	0.0912389
CREB3L4	Acute lymphocytic leukaemia	rs146479329	chr6	25725731	A	G	0.03581	0.1967	0.021704	1.271e-19	0.0246388	-0.296939	0.35792
CREB3L4	Acute lymphocytic leukaemia	rs2117168	chr2	46928080	T	C	0.30732	-0.0495	0.008625	9.498e-09	0.693727	0.178984	0.0903109
CREB3L4	Acute lymphocytic leukaemia	rs28538178	chr1	153576232	G	T	0.02298	0.1458	0.026558	4.022e-08	0.0146717	-0.209105	0.603616
CREB3L4	Acute lymphocytic leukaemia	rs34074094	chr1	153778262	C	G	0.01714	-0.2458	0.030518	7.989e-16	0.0103311	0.387652	0.427838
CREB3L4	Acute lymphocytic leukaemia	rs36229731	chr6	32625770	C	A	0.13484	0.2042	0.011467	6.245e-71	0.205214	0.00538401	0.964498
CREB3L4	Acute lymphocytic leukaemia	rs3752617	chr7	127580863	T	G	0.06955	-0.1229	0.015911	1.126e-14	0.0620186	0.344391	0.0821221
CREB3L4	Acute lymphocytic leukaemia	rs4841132	chr8	9326086	G	A	0.07459	-0.1332	0.015141	1.402e-18	0.856201	0.0952205	0.497995
CREB3L4	Acute lymphocytic leukaemia	rs6671362	chr1	153971312	G	A	0.45722	0.1992	0.008016	2.638e-136	0.536241	0.0827551	0.393852
CREB3L4	Acute lymphocytic leukaemia	rs73743304	chr6	33681684	A	G	0.0723	0.0982	0.015732	4.322e-10	0.0870716	0.103786	0.538138
CREB3L4	Acute lymphocytic leukaemia	rs79507667	chr6	33251387	G	T	0.01451	0.584	0.034434	1.619e-64	0.00514317	-0.514112	0.461016
CREB3L4	Acute lymphocytic leukaemia	rs9468618	chr6	29782999	T	C	0.10306	0.172	0.013277	2.213e-38	0.0550628	-0.136646	0.516345
RAG1	Acute lymphocytic leukaemia	rs10922098	chr1	196695521	T	C	0.40011	-0.0665	0.008187	4.552e-16	0.561049	-0.00464965	0.961802
RAG1	Acute lymphocytic leukaemia	rs6457457	chr6	31910331	T	C	0.06527	0.0931	0.016228	9.639e-09	0.148073	-0.182907	0.182026
RAG1	Acute lymphocytic leukaemia	rs919791	chr19	15466006	A	G	0.2132	-0.2626	0.009651	5.162e-163	0.207504	-0.152129	0.206119
PMS2	Acute lymphocytic leukaemia	rs1042663	chr6	31937353	A	G	0.09002	0.1136	0.0138	1.839e-16	0.0648629	0.00130871	0.994773
PMS2	Acute lymphocytic leukaemia	rs10922098	chr1	196695521	T	C	0.40011	-0.1365	0.008086	6.188e-64	0.561049	-0.00464965	0.961802
PMS2	Acute lymphocytic leukaemia	rs1707652	chr3	165761011	T	C	0.3102	0.074	0.008559	5.345e-18	0.248628	0.196937	0.0791043
PCBD1	Acute lymphocytic leukaemia	rs11596669	chr10	70966791	A	G	0.05099	-0.1499	0.018463	4.709e-16	0.0513741	0.139366	0.525964
PCBD1	Acute lymphocytic leukaemia	rs11611373	chr12	7420475	A	T	0.0418	0.1904	0.020339	7.878e-21	0.0290335	0.05816	0.841221
PCBD1	Acute lymphocytic leukaemia	rs118079346	chr10	70023730	G	T	0.02961	-0.1582	0.023725	2.591e-11	0.0248623	0.0397394	0.900661
PCBD1	Acute lymphocytic leukaemia	rs149422142	chr10	70549475	T	C	0.03247	-0.1842	0.02293	9.51e-16	0.00674896	1.06874	0.0762272
PCBD1	Acute lymphocytic leukaemia	rs2541232	chr10	70761174	A	G	0.48684	0.0533	0.008041	3.384e-11	0.521542	0.183072	0.0597902
PCBD1	Acute lymphocytic leukaemia	rs28374650	chr6	32655590	T	C	0.29732	0.0477	0.00874	4.821e-08	0.339979	-0.0414637	0.687942
PCBD1	Acute lymphocytic leukaemia	rs3747207	chr22	43928975	A	G	0.22927	0.0574	0.009591	2.171e-09	0.226987	0.0434291	0.709227
PCBD1	Acute lymphocytic leukaemia	rs72805136	chr10	69844452	A	G	0.01859	-0.1726	0.030468	1.471e-08	0.00763314	0.465737	0.393709
PCBD1	Acute lymphocytic leukaemia	rs72809253	chr10	70408681	A	G	0.03429	-0.1489	0.022689	5.287e-11	0.0251803	0.525185	0.0926168
PCBD1	Acute lymphocytic leukaemia	rs844124	chr10	70889673	T	C	0.31975	0.1279	0.008608	6.075e-50	0.282918	0.135509	0.211789
PPM1D	Acute lymphocytic leukaemia	rs10922098	chr1	196695521	T	C	0.40011	-0.1114	0.008053	1.606e-43	0.561049	-0.00464965	0.961802
PPM1D	Acute lymphocytic leukaemia	rs2695234	chr4	24802616	G	A	0.07858	-0.0966	0.014614	3.837e-11	0.913949	0.0934681	0.596059
PPM1D	Acute lymphocytic leukaemia	rs4639017	chr3	165833296	C	T	0.39283	-0.048	0.008061	2.61e-09	0.63873	-0.0835108	0.405785
PPM1D	Acute lymphocytic leukaemia	rs6457457	chr6	31910331	T	C	0.06527	0.0944	0.015977	3.451e-09	0.148073	-0.182907	0.182026
PPM1D	Acute lymphocytic leukaemia	rs75327431	chr12	42802980	C	T	0.05347	-0.0978	0.017308	1.6e-08	0.0265877	-0.221128	0.466777
CHFR	Acute lymphocytic leukaemia	rs12146727	chr12	7063032	A	G	0.11875	-0.1862	0.012631	3.489e-49	0.174454	-0.0114846	0.928273
CHFR	Acute lymphocytic leukaemia	rs1355538	chr3	165787389	G	A	0.39847	-0.0686	0.008196	5.753e-17	0.672107	-0.150672	0.144439
CHFR	Acute lymphocytic leukaemia	rs147906938	chr6	31930134	A	T	0.03884	0.142	0.020594	5.375e-12	0.0263923	-0.115052	0.703743
CHFR	Acute lymphocytic leukaemia	rs17580	chr14	94380925	A	T	0.03316	0.1671	0.022636	1.56e-13	0.00915828	-0.00435212	0.993104
CHFR	Acute lymphocytic leukaemia	rs61984785	chr14	105668556	T	C	0.09245	0.0818	0.014258	9.624e-09	0.0434297	-0.0011319	0.996572
BTG2	Acute lymphocytic leukaemia	rs1265941	chr6	31904575	C	A	0.07271	0.15	0.015413	2.203e-22	0.151525	-0.170495	0.20855
BTG2	Acute lymphocytic leukaemia	rs1329424	chr1	196677046	G	T	0.39735	-0.2507	0.008136	1e-200	0.561252	-0.0051467	0.95774
BTG2	Acute lymphocytic leukaemia	rs35351085	chr1	197992799	T	C	0.04877	0.1204	0.018536	8.275e-11	0.0654955	-0.0206492	0.916465
BTG2	Acute lymphocytic leukaemia	rs3863087	chr3	165792099	A	G	0.09559	-0.1058	0.013846	2.15e-14	0.910319	-0.364013	0.0122752
BTG2	Acute lymphocytic leukaemia	rs550671	chr6	31976816	T	C	0.14045	0.1812	0.011491	5.125e-56	0.0767293	0.074595	0.686148
BTG2	Acute lymphocytic leukaemia	rs6445035	chr3	165762312	A	G	0.1904	0.1375	0.010174	1.28e-41	0.176283	0.234745	0.0632135
BTG2	Acute lymphocytic leukaemia	rs9276577	chr6	32758475	G	A	0.21102	0.0582	0.009877	3.803e-09	0.194814	-0.0712121	0.559642
CLK2	Acute lymphocytic leukaemia	rs1047286	chr19	6713251	A	G	0.24066	-0.0574	0.009397	1.006e-09	0.174618	0.0768747	0.545999
CLK2	Acute lymphocytic leukaemia	rs10801660	chr1	198272225	A	G	0.11574	0.0779	0.012567	5.686e-10	0.112625	-0.377509	0.0135672
CLK2	Acute lymphocytic leukaemia	rs111696008	chr2	216622986	A	G	0.02443	-0.1485	0.026744	2.814e-08	0.0147953	-0.259231	0.513244
CLK2	Acute lymphocytic leukaemia	rs1265941	chr6	31904575	C	A	0.07271	0.1726	0.015466	6.395e-29	0.151525	-0.170495	0.20855
CLK2	Acute lymphocytic leukaemia	rs1329424	chr1	196677046	G	T	0.39735	-0.2761	0.008164	1e-200	0.561252	-0.0051467	0.95774
CLK2	Acute lymphocytic leukaemia	rs1707652	chr3	165761011	T	C	0.3102	0.1235	0.008666	4.371e-46	0.248628	0.196937	0.0791043
CLK2	Acute lymphocytic leukaemia	rs550671	chr6	31976816	T	C	0.14045	0.2088	0.011528	2.576e-73	0.0767293	0.074595	0.686148
CLK2	Acute lymphocytic leukaemia	rs704	chr17	28367840	A	G	0.49189	0.183	0.008023	3.712e-115	0.419906	-0.192181	0.050501
CLK2	Acute lymphocytic leukaemia	rs72748420	chr1	196141224	T	C	0.07417	0.0934	0.015349	1.164e-09	0.103218	-0.0287614	0.856817
CLK2	Acute lymphocytic leukaemia	rs9276606	chr6	32768918	T	A	0.28354	0.0619	0.008951	4.67e-12	0.241072	0.00253749	0.982151
CSNK2B	Acute lymphocytic leukaemia	rs61269268	chr14	91775008	C	A	0.20448	0.0624	0.009764	1.65e-10	0.230228	0.0858507	0.456842
CSNK2B	Acute lymphocytic leukaemia	rs6542680	chr2	3592552	T	C	0.18362	-0.1503	0.010148	1.247e-49	0.648336	-0.149514	0.147278
CSNK2B	Acute lymphocytic leukaemia	rs80220851	chr2	3646069	T	A	0.02345	0.1518	0.026235	7.198e-09	0.0538084	0.525136	0.0158012
ARHGAP25	Acute lymphocytic leukaemia	rs13413887	chr2	68769536	G	A	0.23192	0.1736	0.009428	1.039e-75	0.747975	-0.0906551	0.414477
ARHGAP25	Acute lymphocytic leukaemia	rs1354034	chr3	56815721	C	T	0.38119	0.0515	0.008233	3.966e-10	0.704977	-0.125325	0.242803
ARHGAP25	Acute lymphocytic leukaemia	rs141732432	chr2	68372995	CT	C	0.10746	0.0736	0.012981	1.429e-08	0.110931	-0.111277	0.47112
ARHGAP25	Acute lymphocytic leukaemia	rs6993770	chr8	105569300	T	A	0.22448	-0.0687	0.009616	9.067e-13	0.223119	0.0374289	0.74915
TALDO1	Acute lymphocytic leukaemia	rs1354034	chr3	56815721	C	T	0.38119	0.0507	0.008188	5.939e-10	0.704977	-0.125325	0.242803
TALDO1	Acute lymphocytic leukaemia	rs143912793	chr11	726824	A	G	0.04336	0.2024	0.018977	1.474e-26	0.0173647	0.278509	0.454439
TALDO1	Acute lymphocytic leukaemia	rs146899805	chr11	528764	T	C	0.03072	0.2313	0.022476	7.756e-25	0.00694914	-0.294925	0.626566
TALDO1	Acute lymphocytic leukaemia	rs2343596	chr8	105580979	A	C	0.28594	-0.049	0.008827	2.835e-08	0.274148	0.0461713	0.67215
TALDO1	Acute lymphocytic leukaemia	rs35979828	chr12	54292096	T	C	0.08648	-0.0873	0.014362	1.212e-09	0.0225859	-0.0501213	0.879637
TALDO1	Acute lymphocytic leukaemia	rs72849433	chr11	1378104	C	T	0.05164	0.1117	0.018131	7.242e-10	0.0703932	0.0363732	0.850774
P4HA2	Acute lymphocytic leukaemia	rs1042303	chr6	24437230	C	T	0.41761	0.0618	0.008205	5.007e-14	0.390629	0.0429201	0.666458
P4HA2	Acute lymphocytic leukaemia	rs12146727	chr12	7063032	A	G	0.11875	-0.1771	0.012732	5.479e-44	0.174454	-0.0114846	0.928273
P4HA2	Acute lymphocytic leukaemia	rs1355538	chr3	165787389	G	A	0.39847	-0.0496	0.00827	2.006e-09	0.672107	-0.150672	0.144439
NHEJ1	Acute lymphocytic leukaemia	rs115279228	chr2	218914477	T	C	0.02267	-0.3047	0.026332	5.737e-31	0.00948683	-0.0216599	0.965476
NHEJ1	Acute lymphocytic leukaemia	rs142913615	chr2	219546006	A	C	0.01519	-0.2908	0.032717	6.208e-19	0.00222373	-1.11286	0.275821
NHEJ1	Acute lymphocytic leukaemia	rs6993770	chr8	105569300	T	A	0.22448	-0.0678	0.009542	1.201e-12	0.223119	0.0374289	0.74915
NHEJ1	Acute lymphocytic leukaemia	rs72949337	chr2	218238159	T	C	0.02224	-0.2345	0.027244	7.464e-18	0.00182291	0.21131	0.848078
PLCB1	Acute lymphocytic leukaemia	rs1354034	chr3	56815721	C	T	0.38119	0.0627	0.008355	6.178e-14	0.704977	-0.125325	0.242803
PLCB1	Acute lymphocytic leukaemia	rs342293	chr7	106731773	G	C	0.45412	-0.0535	0.008131	4.704e-11	0.481266	-0.00333263	0.972624
PLCB1	Acute lymphocytic leukaemia	rs4980320	chr11	198986	C	T	0.46986	0.054	0.008143	3.329e-11	0.479149	0.0357157	0.716015
GRB10	Acute lymphocytic leukaemia	rs11792848	chr9	96327661	A	G	0.22793	-0.0875	0.009828	5.448e-19	0.266131	0.141633	0.196795
GRB10	Acute lymphocytic leukaemia	rs1354034	chr3	56815721	C	T	0.38119	0.1211	0.008477	2.662e-46	0.704977	-0.125325	0.242803
GRB10	Acute lymphocytic leukaemia	rs342293	chr7	106731773	G	C	0.45412	-0.0572	0.008258	4.3e-12	0.481266	-0.00333263	0.972624
GRB10	Acute lymphocytic leukaemia	rs4980320	chr11	198986	C	T	0.46986	0.0583	0.008273	1.833e-12	0.479149	0.0357157	0.716015
GRB10	Acute lymphocytic leukaemia	rs6993770	chr8	105569300	T	A	0.22448	-0.0725	0.009914	2.611e-13	0.223119	0.0374289	0.74915
RRM1	Acute lymphocytic leukaemia	rs10281146	chr7	32995730	G	A	0.34684	0.0739	0.00844	2.029e-18	0.335959	-0.216099	0.036573
RRM1	Acute lymphocytic leukaemia	rs11031142	chr11	4153145	T	C	0.43826	-0.055	0.008113	1.205e-11	0.53704	0.00322457	0.973643
RRM1	Acute lymphocytic leukaemia	rs11666771	chr19	4351659	A	G	0.1666	-0.061	0.01086	1.946e-08	0.106962	-0.0841135	0.596442
RRM1	Acute lymphocytic leukaemia	rs11900746	chr2	68448519	T	G	0.06719	0.1223	0.01609	2.941e-14	0.939584	0.277454	0.177727
RRM1	Acute lymphocytic leukaemia	rs138116184	chr22	33058440	A	C	0.0846	-0.185	0.014846	1.208e-35	0.0247002	0.213178	0.492778
RRM1	Acute lymphocytic leukaemia	rs146623855	chr20	36515583	A	T	0.0151	-0.2061	0.033369	6.561e-10	0.0134198	0.331585	0.441691
RRM1	Acute lymphocytic leukaemia	rs150158762	chr12	54355409	AT	A	0.09021	0.0777	0.014058	3.254e-08	0.0951153	-0.044981	0.78521
RRM1	Acute lymphocytic leukaemia	rs17692518	chr22	32466867	A	G	0.10813	0.2511	0.013377	1.319e-78	0.0853777	-0.0898393	0.607104
RRM1	Acute lymphocytic leukaemia	rs182172833	chr22	32227638	T	C	0.02694	-0.1644	0.025178	6.595e-11	0.0220821	0.10457	0.755772
RRM1	Acute lymphocytic leukaemia	rs230508	chr4	102558122	G	A	0.34327	0.1306	0.008404	1.876e-54	0.650262	-0.0775501	0.444377
RRM1	Acute lymphocytic leukaemia	rs2425031	chr20	35267481	C	T	0.13576	-0.0709	0.01182	1.992e-09	0.125057	-0.121931	0.405461
RRM1	Acute lymphocytic leukaemia	rs28594470	chr1	25409808	T	A	0.44175	-0.0526	0.008139	1.026e-10	0.437249	0.175807	0.0726173
RRM1	Acute lymphocytic leukaemia	rs377655768	chr17	20894784	T	C	0.03579	0.1288	0.021694	2.899e-09	0.0109154	0.64498	0.163055
RRM1	Acute lymphocytic leukaemia	rs3811444	chr1	247876149	T	C	0.34232	0.081	0.008545	2.565e-21	0.347116	-0.0406718	0.691587
RRM1	Acute lymphocytic leukaemia	rs4460801	chr11	4173032	A	G	0.3804	0.0478	0.008298	8.401e-09	0.412515	0.00314724	0.974574
RRM1	Acute lymphocytic leukaemia	rs543798	chr17	28519296	C	A	0.01882	0.2256	0.029192	1.092e-14	0.0102396	1.18766	0.0114114
RRM1	Acute lymphocytic leukaemia	rs58141407	chr8	21934261	T	C	0.13145	-0.0746	0.011878	3.369e-10	0.141343	0.129129	0.355305
RRM1	Acute lymphocytic leukaemia	rs6014993	chr20	57416581	G	A	0.46061	0.0531	0.008091	5.276e-11	0.528267	-0.0440876	0.652409
RRM1	Acute lymphocytic leukaemia	rs6017001	chr20	37015543	G	A	0.16968	-0.1974	0.010731	1.431e-75	0.237743	-0.143475	0.208348
RRM1	Acute lymphocytic leukaemia	rs68149176	chr16	87852884	T	C	0.32314	-0.0598	0.008602	3.602e-12	0.293065	0.02553	0.812136
RRM1	Acute lymphocytic leukaemia	rs74459970	chr2	68436234	G	A	0.01567	-0.2111	0.033938	4.965e-10	0.00835016	-0.43494	0.437647
RRM1	Acute lymphocytic leukaemia	rs74717647	chr17	29019782	T	C	0.04503	0.1189	0.019192	5.812e-10	0.031871	0.142007	0.601001
RRM1	Acute lymphocytic leukaemia	rs76966048	chr22	34035140	C	T	0.02868	0.1481	0.0253	4.808e-09	0.0146887	0.097311	0.808175
RRM1	Acute lymphocytic leukaemia	rs78038115	chr22	32727047	A	G	0.04768	0.1539	0.019719	5.967e-15	0.00802578	-0.725774	0.182635
RRM1	Acute lymphocytic leukaemia	rs8141337	chr22	32461834	C	G	0.19589	-0.441	0.007938	1e-200	0.137889	-0.0267811	0.850749
RRM1	Acute lymphocytic leukaemia	rs8887	chr19	4502189	C	T	0.39121	0.0677	0.008238	2.061e-16	0.524634	0.0619835	0.526016
RRM1	Acute lymphocytic leukaemia	rs9400888	chr6	116101371	T	C	0.45583	-0.0602	0.008095	1.034e-13	0.507793	0.00805105	0.933922
RRM1	Acute lymphocytic leukaemia	rs9609519	chr22	32381582	A	G	0.14221	-0.0699	0.011675	2.135e-09	0.114126	-0.0891634	0.555401
ADH5	Acute lymphocytic leukaemia	rs13125919	chr4	99078697	T	C	0.11491	0.1137	0.012768	5.343e-19	0.0533136	0.17323	0.427883
ADH5	Acute lymphocytic leukaemia	rs138191461	chr4	100993558	C	A	0.01339	-0.2874	0.035256	3.583e-16	0.00206306	-0.992319	0.336569
ADH5	Acute lymphocytic leukaemia	rs143884562	chr4	108177373	A	T	0.03261	-0.1243	0.022749	4.653e-08	0.014037	0.554132	0.169574
ADH5	Acute lymphocytic leukaemia	rs144873436	chr4	95606814	G	T	0.01615	-0.2452	0.032495	4.497e-14	0.00963322	-0.00332407	0.994833
ADH5	Acute lymphocytic leukaemia	rs151006272	chr4	100142597	A	G	0.01403	-0.2634	0.034568	2.542e-14	0.0187578	-0.107736	0.763449
ADH5	Acute lymphocytic leukaemia	rs28894371	chr4	99083469	A	G	0.04599	-0.3572	0.019159	1.425e-77	0.0360921	0.0541493	0.837069
ADH5	Acute lymphocytic leukaemia	rs72678667	chr4	96035110	C	T	0.01608	-0.2305	0.031372	2.024e-13	0.0478704	0.1236	0.585971
INPP5E	Acute lymphocytic leukaemia	rs10822155	chr10	63311455	A	C	0.43479	0.0643	0.008137	2.736e-15	0.38431	-0.129449	0.193767
INPP5E	Acute lymphocytic leukaemia	rs1398015	chr4	73891519	T	C	0.05914	-0.1083	0.017283	3.701e-10	0.0823312	0.0828648	0.638064
INPP5E	Acute lymphocytic leukaemia	rs16850360	chr4	74006728	G	A	0.02454	-0.1667	0.026935	6.06e-10	0.0358852	-0.570511	0.0303117
INPP5E	Acute lymphocytic leukaemia	rs6542680	chr2	3592552	T	C	0.18362	-0.0697	0.010456	2.63e-11	0.648336	-0.149514	0.147278
INPP5E	Acute lymphocytic leukaemia	rs6993770	chr8	105569300	T	A	0.22448	-0.0549	0.009706	1.546e-08	0.223119	0.0374289	0.74915
ZNF18	Acute lymphocytic leukaemia	rs10922098	chr1	196695521	T	C	0.40011	-0.1918	0.008085	2.126e-124	0.561049	-0.00464965	0.961802
ZNF18	Acute lymphocytic leukaemia	rs1707652	chr3	165761011	T	C	0.3102	0.124	0.008568	1.829e-47	0.248628	0.196937	0.0791043
ZNF18	Acute lymphocytic leukaemia	rs3926704	chr3	167076696	A	G	0.32404	0.0475	0.008505	2.337e-08	0.263214	-0.111206	0.314438
ZNF18	Acute lymphocytic leukaemia	rs444921	chr6	31964400	T	C	0.13897	0.1373	0.011454	4.15e-33	0.0767023	0.074568	0.686358
ZNF18	Acute lymphocytic leukaemia	rs9469195	chr6	32617235	G	C	0.37544	0.0702	0.008183	9.598e-18	0.37734	-0.104164	0.300841
ADH7	Acute lymphocytic leukaemia	rs10922098	chr1	196695521	T	C	0.40011	-0.0787	0.008144	4.301e-22	0.561049	-0.00464965	0.961802
ADH7	Acute lymphocytic leukaemia	rs1573496	chr4	99428512	G	C	0.0721	-0.4233	0.015258	2.155e-169	0.135639	-0.187241	0.186779
ADH7	Acute lymphocytic leukaemia	rs2275848	chr9	93125038	T	G	0.19759	-0.0675	0.010095	2.284e-11	0.777237	0.257161	0.0280731
ADH7	Acute lymphocytic leukaemia	rs2461161	chr10	17839242	C	G	0.45136	0.0579	0.007993	4.356e-13	0.391948	0.0605598	0.546653
ADH7	Acute lymphocytic leukaemia	rs4147541	chr4	99353000	C	G	0.23832	-0.0883	0.00942	7.015e-21	0.200712	0.084837	0.484462
ADH7	Acute lymphocytic leukaemia	rs716556	chr4	99763644	A	G	0.35028	0.0586	0.008443	3.9e-12	0.627233	-0.0853204	0.393783
ADH7	Acute lymphocytic leukaemia	rs78705678	chr10	17794281	G	A	0.36741	0.0577	0.00831	3.828e-12	0.384131	0.0325167	0.745717
ADH7	Acute lymphocytic leukaemia	rs80121626	chr4	99376028	T	C	0.03238	-0.1465	0.022761	1.223e-10	0.0316477	-0.223303	0.42949
SYK	Acute lymphocytic leukaemia	rs1354034	chr3	56815721	C	T	0.38119	0.0581	0.00826	2.005e-12	0.704977	-0.125325	0.242803
SYK	Acute lymphocytic leukaemia	rs342200	chr7	106676033	A	G	0.42559	-0.0447	0.008097	3.382e-08	0.928885	-0.0350435	0.853556
SYK	Acute lymphocytic leukaemia	rs72729008	chr9	90813267	A	G	0.14326	-0.1204	0.011458	7.904e-26	0.133916	-0.018813	0.895063
RBM24	Acute lymphocytic leukaemia	rs1047286	chr19	6713251	A	G	0.24066	-0.0721	0.009325	1.061e-14	0.174618	0.0768747	0.545999
RBM24	Acute lymphocytic leukaemia	rs10922098	chr1	196695521	T	C	0.40011	-0.2331	0.008092	1.721e-182	0.561049	-0.00464965	0.961802
RBM24	Acute lymphocytic leukaemia	rs114009540	chr1	196158413	A	G	0.03606	-0.127	0.021616	4.219e-09	0.0166561	-0.512092	0.171104
RBM24	Acute lymphocytic leukaemia	rs1265941	chr6	31904575	C	A	0.07271	0.1339	0.015333	2.482e-18	0.151525	-0.170495	0.20855
RBM24	Acute lymphocytic leukaemia	rs2686395	chr3	165767231	C	T	0.3101	-0.0993	0.008596	7.186e-31	0.75359	-0.197297	0.0795353
RBM24	Acute lymphocytic leukaemia	rs453821	chr6	31967534	T	C	0.13894	0.1559	0.011481	5.345e-42	0.0767268	0.0746322	0.686005
RBM24	Acute lymphocytic leukaemia	rs9276606	chr6	32768918	T	A	0.28354	0.0535	0.008872	1.636e-09	0.241072	0.00253749	0.982151
KRT7	Acute lymphocytic leukaemia	rs1047286	chr19	6713251	A	G	0.24066	-0.0517	0.009349	3.207e-08	0.174618	0.0768747	0.545999
KRT7	Acute lymphocytic leukaemia	rs10922098	chr1	196695521	T	C	0.40011	-0.1874	0.008136	2.219e-117	0.561049	-0.00464965	0.961802
KRT7	Acute lymphocytic leukaemia	rs112189508	chr11	6262548	C	T	0.05907	0.1698	0.017085	2.822e-23	0.0707402	0.171472	0.374976
KRT7	Acute lymphocytic leukaemia	rs117627469	chr11	8178769	A	G	0.01774	0.2833	0.030074	4.503e-21	0.0025735	-1.05875	0.317247
KRT7	Acute lymphocytic leukaemia	rs143666677	chr11	7154973	G	C	0.01247	0.9777	0.036876	6.808e-155	0.00212511	0.0330486	0.974979
KRT7	Acute lymphocytic leukaemia	rs16914574	chr11	6511260	C	T	0.04057	0.3409	0.020443	1.973e-62	0.012209	-0.262828	0.552149
KRT7	Acute lymphocytic leukaemia	rs192777257	chr11	6144870	A	C	0.04189	0.2389	0.020224	3.348e-32	0.0453299	-0.0271854	0.9076
KRT7	Acute lymphocytic leukaemia	rs2686395	chr3	165767231	C	T	0.3101	-0.1037	0.008629	2.858e-33	0.75359	-0.197297	0.0795353
KRT7	Acute lymphocytic leukaemia	rs550671	chr6	31976816	T	C	0.14045	0.1309	0.011483	4.213e-30	0.0767293	0.074595	0.686148
ATF6B	Acute lymphocytic leukaemia	rs112963922	chr14	94411531	T	C	0.01119	0.2382	0.03864	7.066e-10	0.0313888	-0.255379	0.360445
ATF6B	Acute lymphocytic leukaemia	rs16869652	chr6	33883396	A	G	0.08655	-0.0923	0.014821	4.735e-10	0.0699857	0.356818	0.0601063
ATF6B	Acute lymphocytic leukaemia	rs17580	chr14	94380925	A	T	0.03316	0.2377	0.023167	1.062e-24	0.00915828	-0.00435212	0.993104
ATF6B	Acute lymphocytic leukaemia	rs1800759	chr4	99144358	G	T	0.37859	-0.0488	0.008519	1.014e-08	0.573777	0.215922	0.0288543
ATF6B	Acute lymphocytic leukaemia	rs28578510	chr4	76276521	T	C	0.38629	-0.0493	0.008435	5.084e-09	0.343989	-0.0565695	0.581747
ATF6B	Acute lymphocytic leukaemia	rs35352142	chr1	196743772	T	C	0.17546	0.1009	0.010832	1.219e-20	0.145174	-0.118205	0.390719
ATF6B	Acute lymphocytic leukaemia	rs4846923	chr1	230171476	G	T	0.2588	0.0746	0.009484	3.662e-15	0.659282	-0.0193015	0.850902
ATF6B	Acute lymphocytic leukaemia	rs613426	chr15	42108673	A	T	0.33987	0.0484	0.008675	2.412e-08	0.390422	0.110803	0.264417
ATF6B	Acute lymphocytic leukaemia	rs62395789	chr6	31605024	A	G	0.05425	0.1151	0.018307	3.231e-10	0.0480444	0.342598	0.139627
ATF6B	Acute lymphocytic leukaemia	rs77542162	chr17	69085137	G	A	0.025	0.274	0.025933	4.304e-26	0.00669976	0.215206	0.715155
ATF6B	Acute lymphocytic leukaemia	rs8178824	chr17	66228657	T	C	0.01066	0.3344	0.039788	4.295e-17	0.00972947	-0.507999	0.315668
ATF6B	Acute lymphocytic leukaemia	rs983309	chr8	9320222	G	T	0.08477	-0.1231	0.014734	6.542e-17	0.830252	0.057467	0.661704
WFDC2	Acute lymphocytic leukaemia	rs12592898	chr15	78936857	G	A	0.13815	0.0708	0.011708	1.472e-09	0.856981	-0.0688474	0.620725
WFDC2	Acute lymphocytic leukaemia	rs2272953	chr20	45481252	C	T	0.07783	-0.1072	0.015087	1.199e-12	0.119529	0.0355169	0.812849
WFDC2	Acute lymphocytic leukaemia	rs681343	chr19	48703205	T	C	0.3954	0.0542	0.008288	6.166e-11	0.374874	-0.096858	0.335874
WFDC2	Acute lymphocytic leukaemia	rs77924615	chr16	20381010	A	G	0.19701	-0.0719	0.010206	1.859e-12	0.222995	-0.17512	0.131146
CA8	Acute lymphocytic leukaemia	rs140403163	chr8	60476945	T	A	0.02318	-0.1936	0.02662	3.52e-13	0.0219333	0.481108	0.145556
CA8	Acute lymphocytic leukaemia	rs56227154	chr8	60238324	G	C	0.40113	0.3686	0.006803	1e-200	0.363032	0.126928	0.210942
CA8	Acute lymphocytic leukaemia	rs60757417	chr9	132989049	G	C	0.07243	0.093	0.015218	9.898e-10	0.0954664	0.0847304	0.609968
CA8	Acute lymphocytic leukaemia	rs74701322	chr8	60244268	G	A	0.02099	0.432	0.02761	3.51e-55	0.085486	-0.000399863	0.998183
CA8	Acute lymphocytic leukaemia	rs74985355	chr8	59610315	A	G	0.01592	0.3072	0.031925	6.424e-22	0.0300248	0.58472	0.00947175
CA8	Acute lymphocytic leukaemia	rs76601506	chr8	60587171	A	G	0.0224	-0.1723	0.026853	1.396e-10	0.00505195	0.936527	0.180118
CA8	Acute lymphocytic leukaemia	rs7819622	chr8	60910566	A	G	0.13411	0.151	0.01173	6.386e-38	0.144227	-0.0596203	0.663468
MVK	Acute lymphocytic leukaemia	rs113954333	chr17	28251133	C	T	0.09416	-0.1644	0.013694	3.345e-33	0.0844466	0.157292	0.366066
MVK	Acute lymphocytic leukaemia	rs1619994	chr3	165744047	G	A	0.2807	0.0575	0.008825	7.252e-11	0.253862	0.203883	0.0647739
MVK	Acute lymphocytic leukaemia	rs1914886	chr17	21393104	A	G	0.42279	-0.051	0.008122	3.405e-10	0.416831	0.0355146	0.717609
MVK	Acute lymphocytic leukaemia	rs572515	chr1	196677131	G	A	0.3973	-0.0695	0.008105	9.945e-18	0.561231	-0.00508186	0.95827
MVK	Acute lymphocytic leukaemia	rs614877	chr17	28285970	T	C	0.45162	-0.2464	0.007922	1e-200	0.48263	0.0944277	0.328755
MVK	Acute lymphocytic leukaemia	rs7412	chr19	44908822	T	C	0.05941	0.108	0.016761	1.166e-10	0.0522024	0.0704859	0.746564
DNAI1	Acute lymphocytic leukaemia	rs1047286	chr19	6713251	A	G	0.24066	-0.0538	0.009357	8.954e-09	0.174618	0.0768747	0.545999
DNAI1	Acute lymphocytic leukaemia	rs10922098	chr1	196695521	T	C	0.40011	-0.1667	0.008148	4.989e-93	0.561049	-0.00464965	0.961802
DNAI1	Acute lymphocytic leukaemia	rs1265941	chr6	31904575	C	A	0.07271	0.1106	0.015384	6.509e-13	0.151525	-0.170495	0.20855
DNAI1	Acute lymphocytic leukaemia	rs1707652	chr3	165761011	T	C	0.3102	0.0826	0.00863	1.052e-21	0.248628	0.196937	0.0791043
DNAI1	Acute lymphocytic leukaemia	rs550671	chr6	31976816	T	C	0.14045	0.1173	0.011489	1.8e-24	0.0767293	0.074595	0.686148
RNF146	Acute lymphocytic leukaemia	rs10922098	chr1	196695521	T	C	0.40011	-0.1011	0.008118	1.338e-35	0.561049	-0.00464965	0.961802
RNF146	Acute lymphocytic leukaemia	rs111862412	chr10	7865032	A	G	0.02264	0.1546	0.026173	3.489e-09	0.0151391	-0.374025	0.344869
RNF146	Acute lymphocytic leukaemia	rs1355538	chr3	165787389	G	A	0.39847	-0.0567	0.008114	2.789e-12	0.672107	-0.150672	0.144439
RNF146	Acute lymphocytic leukaemia	rs2284350	chr3	52788840	C	T	0.39076	-0.0662	0.008136	4.053e-16	0.401135	-0.00987706	0.920417
RNF146	Acute lymphocytic leukaemia	rs7084817	chr10	7732395	G	C	0.03465	-0.2171	0.022041	6.86e-23	0.0629909	-0.209694	0.292834
CARD9	Acute lymphocytic leukaemia	rs10922098	chr1	196695521	T	C	0.40011	-0.1482	0.008087	5.232e-75	0.561049	-0.00464965	0.961802
CARD9	Acute lymphocytic leukaemia	rs6457457	chr6	31910331	T	C	0.06527	0.1279	0.016056	1.641e-15	0.148073	-0.182907	0.182026
CARD9	Acute lymphocytic leukaemia	rs697356	chr3	165718150	C	G	0.36502	0.0776	0.008221	3.766e-21	0.322253	0.135682	0.190749
FBXL4	Acute lymphocytic leukaemia	rs111602331	chr20	45928835	C	T	0.21885	-0.1586	0.00982	1.128e-58	0.148914	0.0801319	0.559201
FBXL4	Acute lymphocytic leukaemia	rs111696008	chr2	216622986	A	G	0.02443	-0.2051	0.027048	3.38e-14	0.0147953	-0.259231	0.513244
FBXL4	Acute lymphocytic leukaemia	rs1126605	chr12	7089608	T	C	0.09116	0.1502	0.013921	3.85e-27	0.0784779	-0.0647839	0.71793
FBXL4	Acute lymphocytic leukaemia	rs11755689	chr6	32618599	G	A	0.33707	0.0456	0.008331	4.414e-08	0.388132	-0.0621902	0.539673
FBXL4	Acute lymphocytic leukaemia	rs144202860	chr2	216625740	A	G	0.01274	-0.2121	0.036205	4.675e-09	0.0209708	0.655042	0.0108775
FBXL4	Acute lymphocytic leukaemia	rs3863087	chr3	165792099	A	G	0.09559	-0.1524	0.014061	2.261e-27	0.910319	-0.364013	0.0122752
FBXL4	Acute lymphocytic leukaemia	rs4132620	chr3	167176206	G	A	0.318	0.0512	0.008746	4.804e-09	0.274781	-0.0356305	0.743603
FBXL4	Acute lymphocytic leukaemia	rs6445035	chr3	165762312	A	G	0.1904	0.1857	0.010322	2.327e-72	0.176283	0.234745	0.0632135
FBXL4	Acute lymphocytic leukaemia	rs73262897	chr12	6961967	A	G	0.09123	-0.0836	0.014196	3.882e-09	0.0818525	-0.103373	0.557753
FBXL4	Acute lymphocytic leukaemia	rs7412	chr19	44908822	T	C	0.05941	-0.1318	0.017206	1.855e-14	0.0522024	0.0704859	0.746564
EHD4	Acute lymphocytic leukaemia	rs11792848	chr9	96327661	A	G	0.22793	-0.0633	0.009734	7.878e-11	0.266131	0.141633	0.196795
EHD4	Acute lymphocytic leukaemia	rs4420743	chr2	31317430	A	G	0.04311	0.1136	0.020318	2.258e-08	0.061213	0.257503	0.201264
EHD4	Acute lymphocytic leukaemia	rs655029	chr2	31254972	A	G	0.28471	-0.1741	0.00909	9.045e-82	0.734137	0.0796114	0.468629
FAH	Acute lymphocytic leukaemia	rs11555096	chr15	80180184	T	C	0.02305	-1.4758	0.021891	1e-200	0.0259516	-0.0982182	0.748406
FAH	Acute lymphocytic leukaemia	rs11853785	chr15	79414351	C	A	0.0441	0.1159	0.020318	1.169e-08	0.0199563	-0.198669	0.561569
FAH	Acute lymphocytic leukaemia	rs143477230	chr15	77749815	C	G	0.0111	-0.317	0.040804	7.915e-15	0.00077073	-1.07403	0.559711
FAH	Acute lymphocytic leukaemia	rs143855649	chr15	84594554	A	G	0.01136	-0.299	0.039726	5.211e-14	0.00646532	0.189987	0.765972
FAH	Acute lymphocytic leukaemia	rs145712044	chr15	80097579	A	G	0.05159	0.1699	0.019302	1.344e-18	0.0204244	-0.170429	0.627493
FAH	Acute lymphocytic leukaemia	rs146479592	chr15	82825523	C	T	0.02982	-0.1547	0.025051	6.6e-10	0.0446301	0.472879	0.0435462
FAH	Acute lymphocytic leukaemia	rs738409	chr22	43928847	G	C	0.22998	0.0559	0.010002	2.286e-08	0.227423	0.0415003	0.721347
FAH	Acute lymphocytic leukaemia	rs77218477	chr15	80391648	T	C	0.04205	-0.2688	0.021103	3.667e-37	0.0288068	0.333253	0.256037
RUFY1	Acute lymphocytic leukaemia	rs10922098	chr1	196695521	T	C	0.40011	-0.1034	0.008068	1.327e-37	0.561049	-0.00464965	0.961802
RUFY1	Acute lymphocytic leukaemia	rs12995461	chr2	27555300	C	A	0.21643	0.0631	0.009521	3.419e-11	0.279266	-0.077543	0.474446
RUFY1	Acute lymphocytic leukaemia	rs140431012	chr3	124755083	G	A	0.09594	-0.0876	0.013383	5.929e-11	0.103681	0.0184433	0.908065
RUFY1	Acute lymphocytic leukaemia	rs1697422	chr1	21495404	C	T	0.48923	-0.0466	0.007954	4.671e-09	0.542115	0.00943428	0.923194
RUFY1	Acute lymphocytic leukaemia	rs1706435	chr3	165743688	G	A	0.36981	0.0634	0.008182	9.308e-15	0.311721	0.153164	0.141768
RUFY1	Acute lymphocytic leukaemia	rs56210800	chr3	124753745	G	C	0.09593	-0.0875	0.01338	6.165e-11	0.103681	0.0184183	0.908188
RUFY1	Acute lymphocytic leukaemia	rs6457457	chr6	31910331	T	C	0.06527	0.1064	0.016015	3.055e-11	0.148073	-0.182907	0.182026
HNRNPC	Acute lymphocytic leukaemia	rs10922098	chr1	196695521	T	C	0.40011	-0.1742	0.008147	1.947e-101	0.561049	-0.00464965	0.961802
HNRNPC	Acute lymphocytic leukaemia	rs1707652	chr3	165761011	T	C	0.3102	0.1067	0.00863	4.072e-35	0.248628	0.196937	0.0791043
HNRNPC	Acute lymphocytic leukaemia	rs2232613	chr20	38369011	T	C	0.0989	-0.1396	0.013206	4.055e-26	0.136275	0.131031	0.35268
HNRNPC	Acute lymphocytic leukaemia	rs7774739	chr6	32041524	G	A	0.17585	0.1024	0.011168	4.757e-20	0.00283685	-0.0834957	0.932347
HNRNPC	Acute lymphocytic leukaemia	rs9266722	chr6	31382145	T	C	0.12213	0.0672	0.012188	3.513e-08	0.143679	0.27527	0.0437855
HNRNPC	Acute lymphocytic leukaemia	rs9267139	chr6	31471721	A	G	0.10872	0.0779	0.012772	1.066e-09	0.182723	-0.161392	0.202138
DTX1	Acute lymphocytic leukaemia	rs10159712	chr10	19971440	A	G	0.2838	0.1018	0.009014	1.422e-29	0.771178	0.0265581	0.818886
DTX1	Acute lymphocytic leukaemia	rs10922098	chr1	196695521	T	C	0.40011	-0.1555	0.008275	8.726e-79	0.561049	-0.00464965	0.961802
DTX1	Acute lymphocytic leukaemia	rs11569415	chr19	6716268	A	G	0.24276	-0.0559	0.009414	2.886e-09	0.185009	0.117832	0.344104
DTX1	Acute lymphocytic leukaemia	rs1591734	chr1	169302664	T	C	0.1303	-0.0877	0.012167	5.678e-13	0.0988384	0.168678	0.297611
DTX1	Acute lymphocytic leukaemia	rs2075798	chr6	31878964	A	C	0.0783	0.1069	0.015097	1.433e-12	0.158127	-0.176805	0.184641
DTX1	Acute lymphocytic leukaemia	rs2239853	chr1	169556528	C	T	0.44202	-0.0943	0.008205	1.421e-30	0.613273	0.0375891	0.708035
DTX1	Acute lymphocytic leukaemia	rs2686395	chr3	165767231	C	T	0.3101	-0.0752	0.008741	7.79e-18	0.75359	-0.197297	0.0795353
DTX1	Acute lymphocytic leukaemia	rs6544941	chr2	46947977	A	G	0.33068	-0.0573	0.008607	2.786e-11	0.660186	0.217261	0.0348225
DTX1	Acute lymphocytic leukaemia	rs75519859	chr10	19598843	C	T	0.1016	0.0941	0.013525	3.467e-12	0.0750657	0.0863386	0.644005
DTX1	Acute lymphocytic leukaemia	rs9332701	chr1	169515529	G	A	0.07189	-0.2329	0.015579	1.576e-50	0.0426499	-0.283399	0.243415
RECQL	Acute lymphocytic leukaemia	rs11047515	chr12	24586912	G	A	0.05924	0.1637	0.017731	2.645e-20	0.0469643	0.320606	0.164791
RECQL	Acute lymphocytic leukaemia	rs112755939	chr12	21289401	C	G	0.0119	1.054	0.038132	3.615e-168	0.00161938	-0.784803	0.585514
RECQL	Acute lymphocytic leukaemia	rs11613698	chr12	20590513	A	G	0.01726	0.6892	0.031999	6.804e-103	0.00476047	-1.09585	0.148727
RECQL	Acute lymphocytic leukaemia	rs118171527	chr12	21445952	C	T	0.03726	0.5176	0.021661	3.416e-126	0.0156728	-0.284949	0.46897
RECQL	Acute lymphocytic leukaemia	rs1354034	chr3	56815721	C	T	0.38119	0.1283	0.008431	2.682e-52	0.704977	-0.125325	0.242803
RECQL	Acute lymphocytic leukaemia	rs145627956	chr12	24790363	A	G	0.0144	0.3202	0.035725	3.164e-19	0.0234017	0.85914	0.000346115
RECQL	Acute lymphocytic leukaemia	rs146780586	chr12	16428255	A	C	0.02789	0.196	0.024978	4.264e-15	0.0162257	-0.458092	0.224259
RECQL	Acute lymphocytic leukaemia	rs16926592	chr12	23683929	T	A	0.01176	0.8288	0.038313	8.88e-104	0.0135314	-0.137291	0.748426
RECQL	Acute lymphocytic leukaemia	rs17363755	chr12	23177886	C	T	0.04238	0.2826	0.020636	1.098e-42	0.108351	-0.175999	0.262047
RECQL	Acute lymphocytic leukaemia	rs73064470	chr12	24358968	T	C	0.01452	0.6357	0.035637	3.563e-71	0.00877562	-0.302646	0.575007
RECQL	Acute lymphocytic leukaemia	rs76728072	chr12	21924253	G	A	0.02121	0.6894	0.028359	1.547e-130	0.00622159	-0.231606	0.710981
PQBP1	Acute lymphocytic leukaemia	rs10922098	chr1	196695521	T	C	0.40011	-0.1011	0.007974	7.761e-37	0.561049	-0.00464965	0.961802
PQBP1	Acute lymphocytic leukaemia	rs11720167	chr3	165768357	G	T	0.19032	0.0695	0.009934	2.629e-12	0.17406	0.236308	0.062939
PQBP1	Acute lymphocytic leukaemia	rs6444156	chr3	186679685	A	G	0.25196	0.0506	0.008975	1.722e-08	0.319313	-0.163341	0.11857
TCTN2	Acute lymphocytic leukaemia	rs12067507	chr1	56956838	T	C	0.05177	0.2962	0.018437	4.481e-58	0.0370394	-0.145564	0.56695
TCTN2	Acute lymphocytic leukaemia	rs6542680	chr2	3592552	T	C	0.18362	-0.2479	0.010307	7.874e-128	0.648336	-0.149514	0.147278
TCTN2	Acute lymphocytic leukaemia	rs80220851	chr2	3646069	T	A	0.02345	0.1805	0.026769	1.554e-11	0.0538084	0.525136	0.0158012
RHPN2	Acute lymphocytic leukaemia	rs1047286	chr19	6713251	A	G	0.24066	-0.0514	0.009336	3.679e-08	0.174618	0.0768747	0.545999
RHPN2	Acute lymphocytic leukaemia	rs10922098	chr1	196695521	T	C	0.40011	-0.1985	0.008109	2.426e-132	0.561049	-0.00464965	0.961802
RHPN2	Acute lymphocytic leukaemia	rs1451915	chr1	196058002	A	C	0.13641	0.0651	0.011573	1.855e-08	0.103898	0.0553784	0.73219
RHPN2	Acute lymphocytic leukaemia	rs1707652	chr3	165761011	T	C	0.3102	0.1008	0.008601	1.011e-31	0.248628	0.196937	0.0791043
RHPN2	Acute lymphocytic leukaemia	rs550671	chr6	31976816	T	C	0.14045	0.142	0.011449	2.515e-35	0.0767293	0.074595	0.686148
RHPN2	Acute lymphocytic leukaemia	rs704	chr17	28367840	A	G	0.49189	0.0488	0.007997	1.047e-09	0.419906	-0.192181	0.050501
RHPN2	Acute lymphocytic leukaemia	rs9469195	chr6	32617235	G	C	0.37544	0.064	0.008211	6.458e-15	0.37734	-0.104164	0.300841
SOCS3	Acute lymphocytic leukaemia	rs10171729	chr2	241069640	T	C	0.17982	0.3234	0.01047	1e-200	0.195431	0.248741	0.0418129
SOCS3	Acute lymphocytic leukaemia	rs12134934	chr1	186312268	T	C	0.05379	-0.1381	0.017309	1.48e-15	0.0705085	-0.100994	0.596094
SOCS3	Acute lymphocytic leukaemia	rs144744138	chr1	186400848	A	T	0.02317	0.1664	0.026548	3.658e-10	0.0353756	0.431169	0.102702
SOCS3	Acute lymphocytic leukaemia	rs183812412	chr2	241602441	T	C	0.03985	0.1936	0.020629	6.308e-21	0.00894702	0.695659	0.194471
SOCS3	Acute lymphocytic leukaemia	rs2097976	chr2	241184292	T	C	0.0766	0.1187	0.015093	3.697e-15	0.136944	-0.0148257	0.916667
SOCS3	Acute lymphocytic leukaemia	rs4666000	chr2	27616502	C	T	0.22594	0.0523	0.009565	4.558e-08	0.297186	-0.00869338	0.934898
SOCS3	Acute lymphocytic leukaemia	rs4675969	chr2	241278212	A	G	0.19783	0.0776	0.01024	3.499e-14	0.158478	0.0716351	0.586912
SOCS3	Acute lymphocytic leukaemia	rs77418648	chr2	240462987	A	G	0.10556	0.0928	0.013159	1.76e-12	0.121369	0.0775431	0.599752
SOCS3	Acute lymphocytic leukaemia	rs78623688	chr2	240210368	C	G	0.0479	0.1406	0.018974	1.263e-13	0.0328305	0.100667	0.71597
PYGL	Acute lymphocytic leukaemia	rs1001652	chr12	7223650	C	T	0.20649	-0.0594	0.009765	1.181e-09	0.138816	-0.115268	0.417115
PYGL	Acute lymphocytic leukaemia	rs11611373	chr12	7420475	A	T	0.0418	-0.11	0.019887	3.18e-08	0.0290335	0.05816	0.841221
PYGL	Acute lymphocytic leukaemia	rs117296551	chr14	38189169	T	A	0.02211	-0.1484	0.026262	1.598e-08	0.00226699	-1.00263	0.346631
PYGL	Acute lymphocytic leukaemia	rs143575738	chr8	8822148	CA	C	0.056	-0.1039	0.017054	1.111e-09	0.0561401	-0.164492	0.439407
PYGL	Acute lymphocytic leukaemia	rs17720606	chr14	50864597	A	C	0.28657	-0.0635	0.00874	3.71e-13	0.338824	-0.0293148	0.774895
PYGL	Acute lymphocytic leukaemia	rs3748136	chr8	9172650	A	G	0.17278	-0.1396	0.010377	2.989e-41	0.30602	-0.0127909	0.905193
PYGL	Acute lymphocytic leukaemia	rs4759076	chr12	54336088	C	T	0.4756	0.0468	0.007891	3.017e-09	0.582206	0.0627663	0.52415
PYGL	Acute lymphocytic leukaemia	rs73284790	chr14	50902292	A	G	0.08333	-0.1914	0.014063	3.501e-42	0.0975536	-0.0376547	0.817057
PYGL	Acute lymphocytic leukaemia	rs79419800	chr14	42265331	G	A	0.02513	-0.148	0.024832	2.522e-09	0.0114577	-0.150715	0.747858
POLR3F	Acute lymphocytic leukaemia	rs10922098	chr1	196695521	T	C	0.40011	-0.06	0.007994	6.099e-14	0.561049	-0.00464965	0.961802
POLR3F	Acute lymphocytic leukaemia	rs557011	chr6	32619236	T	C	0.40141	0.0445	0.007968	2.336e-08	0.351361	0.0512858	0.614755
POLR3F	Acute lymphocytic leukaemia	rs6542680	chr2	3592552	T	C	0.18362	-0.065	0.010125	1.363e-10	0.648336	-0.149514	0.147278
GALK1	Acute lymphocytic leukaemia	rs1354034	chr3	56815721	C	T	0.38119	0.0458	0.00834	3.985e-08	0.704977	-0.125325	0.242803
GALK1	Acute lymphocytic leukaemia	rs1619994	chr3	165744047	G	A	0.2807	0.0545	0.009017	1.499e-09	0.253862	0.203883	0.0647739
GALK1	Acute lymphocytic leukaemia	rs17580	chr14	94380925	A	T	0.03316	0.5647	0.022669	5.694e-137	0.00915828	-0.00435212	0.993104
EIF3G	Acute lymphocytic leukaemia	rs10876550	chr12	54318524	A	G	0.43699	0.0522	0.008235	2.31e-10	0.677995	0.0442492	0.67157
[truncated: 98,570 more rows]
