# Supplementary material for: Study on the Gene Regulatory Effects in Leukemia Based on Multi-omics Mendelian Randomization, Network Pharmacology, and Functional Validation
Source: Research Square preprint supplement (doi:10.21203/rs.3.rs-7510513/v1), 2025-09-25
Supplement: Supplementary file 7 [file c43b2c21fc8caafce183ae00.xlsx]

## Sheet: Supplementary Table 5
Supplementary Table 5. Cochrane Q-test results
Exposure-eQTL	Outcome	Method	Q	Q_df	Q_pval			Exposure-pQTL	Outcome	Method	Q	Q_df	Q_pval
A2MP1	Acute Lymphoblastic Leukemia	MR Egger	26.7107738143194	25	0.370486473812816			CRYBB2	Acute lymphocytic leukaemia	MR Egger	6.89717716762839	3	0.0752483075003943
A2MP1	Acute Lymphoblastic Leukemia	Inverse variance weighted	27.440307491972	26	0.386535519650104			CRYBB2	Acute lymphocytic leukaemia	Inverse variance weighted	6.92326142032166	4	0.139999506570658
AARS	Acute Lymphoblastic Leukemia	MR Egger	1.94849478102766	5	0.856224898199631			RAF1	Acute lymphocytic leukaemia	MR Egger	0.99848599330393	2	0.606989979284014
AARS	Acute Lymphoblastic Leukemia	Inverse variance weighted	1.98647402772099	6	0.920938368726933			RAF1	Acute lymphocytic leukaemia	Inverse variance weighted	1.23613727091182	3	0.74435078214088
ABCA2	Acute Lymphoblastic Leukemia	MR Egger	16.176492507734	19	0.645471639787872			ZNF41	Acute lymphocytic leukaemia	MR Egger	0.94143488054528	2	0.624554027297238
ABCA2	Acute Lymphoblastic Leukemia	Inverse variance weighted	18.2777661989732	20	0.569116096813007			ZNF41	Acute lymphocytic leukaemia	Inverse variance weighted	1.53405495482758	3	0.674433060198327
ABCB9	Acute Lymphoblastic Leukemia	MR Egger	11.7800522420314	21	0.945366102542764			GUCA1A	Acute lymphocytic leukaemia	MR Egger	10.4066643128509	6	0.108538379653663
ABCB9	Acute Lymphoblastic Leukemia	Inverse variance weighted	12.3625492531947	22	0.949432943003283			GUCA1A	Acute lymphocytic leukaemia	Inverse variance weighted	12.4759309799661	7	0.0859544161672176
ABT1	Acute Lymphoblastic Leukemia	MR Egger	8.79362723218679	12	0.720449034253308			OCRL	Acute lymphocytic leukaemia	MR Egger	5.51172716447472	4	0.23870057386612
ABT1	Acute Lymphoblastic Leukemia	Inverse variance weighted	9.28022542818922	13	0.751465354983838			OCRL	Acute lymphocytic leukaemia	Inverse variance weighted	8.39483390964237	5	0.135776234810059
AC002511.1	Acute Lymphoblastic Leukemia	MR Egger	0.661982888597258	1	0.415860780678896			SPDEF	Acute lymphocytic leukaemia	MR Egger	4.48369677253689	4	0.3444850004472
AC002511.1	Acute Lymphoblastic Leukemia	Inverse variance weighted	0.689647676873276	2	0.708345125662181			SPDEF	Acute lymphocytic leukaemia	Inverse variance weighted	4.77932323042997	5	0.443401218287787
AC004696.2	Acute Lymphoblastic Leukemia	MR Egger	4.18977975444757	6	0.65101133412993			SNAI2	Acute lymphocytic leukaemia	MR Egger	1.71869539256577	2	0.423438202564329
AC004696.2	Acute Lymphoblastic Leukemia	Inverse variance weighted	4.25856752315689	7	0.749560286688201			SNAI2	Acute lymphocytic leukaemia	Inverse variance weighted	2.05471190221506	3	0.561129043890274
AC005154.6	Acute Lymphoblastic Leukemia	MR Egger	18.9240878010502	25	0.800745765010345			KCNAB2	Acute lymphocytic leukaemia	MR Egger	0.113892716430962	1	0.735755124373606
AC005154.6	Acute Lymphoblastic Leukemia	Inverse variance weighted	20.6951501727971	26	0.75752342401646			KCNAB2	Acute lymphocytic leukaemia	Inverse variance weighted	0.179164770736283	2	0.914312936013509
AC005488.1	Acute Lymphoblastic Leukemia	MR Egger	39.4125553843092	34	0.240593804890718			VDR	Acute lymphocytic leukaemia	MR Egger	5.05420419311734	3	0.167870804067264
AC005488.1	Acute Lymphoblastic Leukemia	Inverse variance weighted	39.5512192872105	35	0.273919784481617			VDR	Acute lymphocytic leukaemia	Inverse variance weighted	5.94427343167594	4	0.203348799482142
AC005682.6	Acute Lymphoblastic Leukemia	MR Egger	6.75189147559305	13	0.91448072553174			HOGA1	Acute lymphocytic leukaemia	MR Egger	4.24569555339983	3	0.236126528824962
AC005682.6	Acute Lymphoblastic Leukemia	Inverse variance weighted	7.15027046941294	14	0.928763586406794			HOGA1	Acute lymphocytic leukaemia	Inverse variance weighted	4.87435791707157	4	0.300433786478116
AC006129.4	Acute Lymphoblastic Leukemia	MR Egger	8.06810010565702	9	0.527298222256031			DUSP4	Acute lymphocytic leukaemia	MR Egger	0.595198337503584	2	0.742598936959479
AC006129.4	Acute Lymphoblastic Leukemia	Inverse variance weighted	8.20143547965981	10	0.6091682417503			DUSP4	Acute lymphocytic leukaemia	Inverse variance weighted	6.27315844640408	3	0.0990509331385956
AC009299.3	Acute Lymphoblastic Leukemia	MR Egger	29.3542957183597	34	0.694758522453693			ZHX3	Acute lymphocytic leukaemia	MR Egger	2.30458940257226	2	0.315911015589664
AC009299.3	Acute Lymphoblastic Leukemia	Inverse variance weighted	29.8703481637921	35	0.714002555936543			ZHX3	Acute lymphocytic leukaemia	Inverse variance weighted	2.81588020984879	3	0.420892419200407
AC009404.2	Acute Lymphoblastic Leukemia	MR Egger	3.99425436832673	5	0.550243480610237			SIGLEC12	Acute lymphocytic leukaemia	MR Egger	6.96172523614878	10	0.729053319236883
AC009404.2	Acute Lymphoblastic Leukemia	Inverse variance weighted	4.01363513901833	6	0.674831107917272			SIGLEC12	Acute lymphocytic leukaemia	Inverse variance weighted	7.6416750675155	11	0.744996874575278
AC009506.1	Acute Lymphoblastic Leukemia	MR Egger	22.7471748343981	41	0.990674098009383			HNF4A	Acute lymphocytic leukaemia	MR Egger	2.55581623370306	4	0.634669690638918
AC009506.1	Acute Lymphoblastic Leukemia	Inverse variance weighted	26.8632643328117	42	0.966441170750049			HNF4A	Acute lymphocytic leukaemia	Inverse variance weighted	2.86968782186299	5	0.720067726116208
AC011816.1	Acute Lymphoblastic Leukemia	MR Egger	14.7678995140961	19	0.737230606012521			WNT10A	Acute lymphocytic leukaemia	MR Egger	5.3450348187625	4	0.253690555564558
AC011816.1	Acute Lymphoblastic Leukemia	Inverse variance weighted	15.016515999844	20	0.775461784298201			WNT10A	Acute lymphocytic leukaemia	Inverse variance weighted	5.34503496256518	5	0.375237624082899
AC012309.5	Acute Lymphoblastic Leukemia	MR Egger	22.6464438103076	17	0.161118501934372			BIRC2	Acute lymphocytic leukaemia	MR Egger	4.35935482244074	6	0.628168004039325
AC012309.5	Acute Lymphoblastic Leukemia	Inverse variance weighted	24.3913752069451	18	0.142619221774474			BIRC2	Acute lymphocytic leukaemia	Inverse variance weighted	5.91802414419637	7	0.549353294524774
AC012314.20	Acute Lymphoblastic Leukemia	MR Egger	0.925796837134294	1	0.33595750131805			NCF2	Acute lymphocytic leukaemia	MR Egger	9.05650989995353	8	0.33755131224058
AC012314.20	Acute Lymphoblastic Leukemia	Inverse variance weighted	3.42449459835345	2	0.180459789446443			NCF2	Acute lymphocytic leukaemia	Inverse variance weighted	12.9963793716343	9	0.162770160223853
AC016773.1	Acute Lymphoblastic Leukemia	MR Egger	30.9921720429443	30	0.415792031124298			CBFB	Acute lymphocytic leukaemia	MR Egger	1.39240940704274	2	0.498473573250848
AC016773.1	Acute Lymphoblastic Leukemia	Inverse variance weighted	31.0016750268524	31	0.466128097040573			CBFB	Acute lymphocytic leukaemia	Inverse variance weighted	1.97575115533652	3	0.577454867012051
AC018638.1	Acute Lymphoblastic Leukemia	MR Egger	8.86940649551135	5	0.114387846836089			ILK	Acute lymphocytic leukaemia	MR Egger	2.25860760063654e-05	1	0.996208083029219
AC018638.1	Acute Lymphoblastic Leukemia	Inverse variance weighted	8.87306493427154	6	0.180843667411449			ILK	Acute lymphocytic leukaemia	Inverse variance weighted	0.172900904681121	2	0.917180991830326
AC018755.15	Acute Lymphoblastic Leukemia	MR Egger	0.914870861984738	2	0.63290469373577			FOXM1	Acute lymphocytic leukaemia	MR Egger	0.510734509789527	2	0.774631958336655
AC018755.15	Acute Lymphoblastic Leukemia	Inverse variance weighted	1.30005785839845	3	0.729119337266078			FOXM1	Acute lymphocytic leukaemia	Inverse variance weighted	1.52882267475678	3	0.675634226305943
AC018755.16	Acute Lymphoblastic Leukemia	MR Egger	28.4711932491315	29	0.492839947595869			FANCL	Acute lymphocytic leukaemia	MR Egger	0.0381344711483723	1	0.845173367013288
AC018755.16	Acute Lymphoblastic Leukemia	Inverse variance weighted	30.0987789041415	30	0.460602905058455			FANCL	Acute lymphocytic leukaemia	Inverse variance weighted	1.67967213106336	2	0.431781301465528
AC018804.6	Acute Lymphoblastic Leukemia	MR Egger	5.76029360867122	6	0.450570792632779			RBBP9	Acute lymphocytic leukaemia	MR Egger	4.91554508925047	3	0.178086839208229
AC018804.6	Acute Lymphoblastic Leukemia	Inverse variance weighted	5.79640444404205	7	0.563713297281579			RBBP9	Acute lymphocytic leukaemia	Inverse variance weighted	5.05260715648099	4	0.281942141548354
AC068831.10	Acute Lymphoblastic Leukemia	MR Egger	0.379422334454231	3	0.944459774094651			ACBD6	Acute lymphocytic leukaemia	MR Egger	0.644443315453285	1	0.422106373368039
AC068831.10	Acute Lymphoblastic Leukemia	Inverse variance weighted	1.30230034956251	4	0.860985122450004			ACBD6	Acute lymphocytic leukaemia	Inverse variance weighted	3.70821858331366	2	0.156592358696599
AC079325.6	Acute Lymphoblastic Leukemia	MR Egger	14.9061731590579	26	0.959025955347233			BAG3	Acute lymphocytic leukaemia	MR Egger	4.48960653817026	1	0.0341015255033672
AC079325.6	Acute Lymphoblastic Leukemia	Inverse variance weighted	16.0871327000384	27	0.951266154821815			BAG3	Acute lymphocytic leukaemia	Inverse variance weighted	4.50592354723389	2	0.105087517749677
AC079776.7	Acute Lymphoblastic Leukemia	MR Egger	6.18390864126044	4	0.185828395551094			SATB2	Acute lymphocytic leukaemia	MR Egger	4.51599801851273	4	0.340654741400765
AC079776.7	Acute Lymphoblastic Leukemia	Inverse variance weighted	6.45067029764416	5	0.264801632606806			SATB2	Acute lymphocytic leukaemia	Inverse variance weighted	6.85759659404999	5	0.231448291132593
AC083949.1	Acute Lymphoblastic Leukemia	MR Egger	5.1924268182164	11	0.921490259651237			NEFL	Acute lymphocytic leukaemia	MR Egger	14.2817341956474	8	0.0747112835885559
AC083949.1	Acute Lymphoblastic Leukemia	Inverse variance weighted	5.41638620571952	12	0.942607634215531			NEFL	Acute lymphocytic leukaemia	Inverse variance weighted	18.1559961444969	9	0.0334062404932754
AC087793.1	Acute Lymphoblastic Leukemia	MR Egger	9.13899517823883	11	0.609064092797671			STAR	Acute lymphocytic leukaemia	MR Egger	5.55773755977801	2	0.0621087262935967
AC087793.1	Acute Lymphoblastic Leukemia	Inverse variance weighted	11.3957363905515	12	0.495342571931818			STAR	Acute lymphocytic leukaemia	Inverse variance weighted	6.20303138975212	3	0.102139458052896
AC093609.1	Acute Lymphoblastic Leukemia	MR Egger	2.38990796862295	3	0.495516016000174			APRT	Acute lymphocytic leukaemia	MR Egger	4.96220619239354	4	0.291197405910775
AC093609.1	Acute Lymphoblastic Leukemia	Inverse variance weighted	2.50442465789609	4	0.643843665036515			APRT	Acute lymphocytic leukaemia	Inverse variance weighted	6.27028006061611	5	0.280800741729659
AC108488.3	Acute Lymphoblastic Leukemia	MR Egger	15.6955838820459	15	0.40256671475652			ENO2	Acute lymphocytic leukaemia	MR Egger	0.961205058687462	5	0.965633768488602
AC108488.3	Acute Lymphoblastic Leukemia	Inverse variance weighted	17.2977683563277	16	0.366586250798711			ENO2	Acute lymphocytic leukaemia	Inverse variance weighted	2.46310510255729	6	0.872573725507909
AC127904.2	Acute Lymphoblastic Leukemia	MR Egger	12.3562716000534	12	0.41750772556318			IL10RA	Acute lymphocytic leukaemia	MR Egger	12.2005309357378	7	0.0941541745778101
AC127904.2	Acute Lymphoblastic Leukemia	Inverse variance weighted	12.3884079176026	13	0.496080332722826			IL10RA	Acute lymphocytic leukaemia	Inverse variance weighted	18.1808136261764	8	0.0199110081716229
AC131056.3	Acute Lymphoblastic Leukemia	MR Egger	5.72007197875332	11	0.891373736430479			STAT3	Acute lymphocytic leukaemia	MR Egger	3.07125149965276	5	0.689001787036129
AC131056.3	Acute Lymphoblastic Leukemia	Inverse variance weighted	7.90235331385714	12	0.792713830386157			STAT3	Acute lymphocytic leukaemia	Inverse variance weighted	3.27399534144267	6	0.773754614327141
AC131971.1	Acute Lymphoblastic Leukemia	MR Egger	4.68121065628157	4	0.321597890334779			JUN	Acute lymphocytic leukaemia	MR Egger	5.93939446512834	3	0.114596335127908
AC131971.1	Acute Lymphoblastic Leukemia	Inverse variance weighted	4.69899539778838	5	0.453707632344018			JUN	Acute lymphocytic leukaemia	Inverse variance weighted	5.95169258046021	4	0.202785063454624
AC144831.1	Acute Lymphoblastic Leukemia	MR Egger	4.54310085313405	4	0.337467382609382			SMAD3	Acute lymphocytic leukaemia	MR Egger	1.36829261326813	2	0.504520751800484
AC144831.1	Acute Lymphoblastic Leukemia	Inverse variance weighted	4.62374753638985	5	0.463499054373356			SMAD3	Acute lymphocytic leukaemia	Inverse variance weighted	1.43872690520633	3	0.696482561942729
ACACB	Acute Lymphoblastic Leukemia	MR Egger	31.0886879356281	44	0.928817796630736			SMAD2	Acute lymphocytic leukaemia	MR Egger	5.72446014472121e-05	1	0.993963250066245
ACACB	Acute Lymphoblastic Leukemia	Inverse variance weighted	32.4512	45	0.919021649538525			SMAD2	Acute lymphocytic leukaemia	Inverse variance weighted	0.00179979537839157	2	0.999100507097299
ACAD8	Acute Lymphoblastic Leukemia	MR Egger	18.992944313966	22	0.645764091522239			PDGFRA	Acute lymphocytic leukaemia	MR Egger	9.11131973766681	12	0.693393982446517
ACAD8	Acute Lymphoblastic Leukemia	Inverse variance weighted	22.1320759417684	23	0.512290686157436			PDGFRA	Acute lymphocytic leukaemia	Inverse variance weighted	13.8715085698353	13	0.382954884196311
ACBD4	Acute Lymphoblastic Leukemia	MR Egger	0.831200903181714	4	0.934216879112362			STAT1	Acute lymphocytic leukaemia	MR Egger	0.423394865447741	2	0.80920950084439
ACBD4	Acute Lymphoblastic Leukemia	Inverse variance weighted	2.85288567905405	5	0.722653997544824			STAT1	Acute lymphocytic leukaemia	Inverse variance weighted	1.10091908431432	3	0.776852217641346
ACD	Acute Lymphoblastic Leukemia	MR Egger	2.82655366491306	3	0.41914734481342			STAT6	Acute lymphocytic leukaemia	MR Egger	13.9565262571035	8	0.0829056041305556
ACD	Acute Lymphoblastic Leukemia	Inverse variance weighted	3.05404985112468	4	0.548821386638228			STAT6	Acute lymphocytic leukaemia	Inverse variance weighted	13.9970432373539	9	0.122430444694215
ACER1	Acute Lymphoblastic Leukemia	MR Egger	0.325979090181866	1	0.568036393230805			ZNRF3	Acute lymphocytic leukaemia	MR Egger	6.73002986043556	4	0.15086146396219
ACER1	Acute Lymphoblastic Leukemia	Inverse variance weighted	0.327122987883491	2	0.849114282011893			ZNRF3	Acute lymphocytic leukaemia	Inverse variance weighted	8.15400292755765	5	0.147949970236211
ACOT7	Acute Lymphoblastic Leukemia	MR Egger	0.461001280484394	5	0.993481766523499			ANGPTL3	Acute lymphocytic leukaemia	MR Egger	9.83519203060138	11	0.545269972758763
ACOT7	Acute Lymphoblastic Leukemia	Inverse variance weighted	2.62375331361719	6	0.854368733226047			ANGPTL3	Acute lymphocytic leukaemia	Inverse variance weighted	10.4262305832335	12	0.578621238458347
ACP6	Acute Lymphoblastic Leukemia	MR Egger	26.5085889173721	29	0.598199326129995			STX12	Acute lymphocytic leukaemia	MR Egger	2.40862123873509	1	0.120668603521161
ACP6	Acute Lymphoblastic Leukemia	Inverse variance weighted	28.1407229389309	30	0.562979599035502			STX12	Acute lymphocytic leukaemia	Inverse variance weighted	2.83663417650434	2	0.24212114273803
ACSF2	Acute Lymphoblastic Leukemia	MR Egger	11.8757339010184	11	0.37305608405718			SCARA5	Acute lymphocytic leukaemia	MR Egger	12.8676922723628	10	0.231163677567601
ACSF2	Acute Lymphoblastic Leukemia	Inverse variance weighted	12.1873924325085	12	0.430749759338285			SCARA5	Acute lymphocytic leukaemia	Inverse variance weighted	12.8784294902187	11	0.301345446280738
ACSM1	Acute Lymphoblastic Leukemia	MR Egger	9.20314658625858	10	0.512938995019212			NPDC1	Acute lymphocytic leukaemia	MR Egger	0.297002257908274	1	0.585767867766664
ACSM1	Acute Lymphoblastic Leukemia	Inverse variance weighted	9.72919033836909	11	0.554898694847362			NPDC1	Acute lymphocytic leukaemia	Inverse variance weighted	0.370368775776796	2	0.830951052415632
ACSS1	Acute Lymphoblastic Leukemia	MR Egger	11.9284617375693	22	0.958838890342252			GOSR2	Acute lymphocytic leukaemia	MR Egger	3.94687867619753	3	0.26725770171326
ACSS1	Acute Lymphoblastic Leukemia	Inverse variance weighted	11.9323447194467	23	0.971501172103012			GOSR2	Acute lymphocytic leukaemia	Inverse variance weighted	4.82398957726135	4	0.305838624709912
ACTBP8	Acute Lymphoblastic Leukemia	MR Egger	40.3844554258665	54	0.91532908479602			SLC3A2	Acute lymphocytic leukaemia	MR Egger	1.32123953826384	1	0.250369713452612
ACTBP8	Acute Lymphoblastic Leukemia	Inverse variance weighted	40.4156992246176	55	0.9294540971707			SLC3A2	Acute lymphocytic leukaemia	Inverse variance weighted	1.66320387374637	2	0.435351322087832
ACTR1B	Acute Lymphoblastic Leukemia	MR Egger	16.8170866287432	16	0.397527760983518			AGA	Acute lymphocytic leukaemia	MR Egger	3.07004118251382	3	0.380951766884528
ACTR1B	Acute Lymphoblastic Leukemia	Inverse variance weighted	17.9505005614408	17	0.391970102188578			AGA	Acute lymphocytic leukaemia	Inverse variance weighted	4.37943531302267	4	0.357083635131693
ACTR5	Acute Lymphoblastic Leukemia	MR Egger	33.428291388536	42	0.824741465528411			CSF2RA	Acute lymphocytic leukaemia	MR Egger	2.98863698450102	3	0.393380449749259
ACTR5	Acute Lymphoblastic Leukemia	Inverse variance weighted	33.4354730843095	43	0.8522696556323			CSF2RA	Acute lymphocytic leukaemia	Inverse variance weighted	4.30070187858921	4	0.366837215668793
ACVR1B	Acute Lymphoblastic Leukemia	MR Egger	1.26617328098868	5	0.938373627379463			CLMP	Acute lymphocytic leukaemia	MR Egger	4.47427806606212	4	0.345608340894643
ACVR1B	Acute Lymphoblastic Leukemia	Inverse variance weighted	1.28857225745841	6	0.972284099700079			CLMP	Acute lymphocytic leukaemia	Inverse variance weighted	6.14580026236517	5	0.292289377872352
ACYP2	Acute Lymphoblastic Leukemia	MR Egger	37.0913093369218	49	0.894024589731931			TMEM190	Acute lymphocytic leukaemia	MR Egger	16.7737923936183	9	0.0523784746168263
ACYP2	Acute Lymphoblastic Leukemia	Inverse variance weighted	42.5807834400589	50	0.762563699552804			TMEM190	Acute lymphocytic leukaemia	Inverse variance weighted	16.9160737457183	10	0.0762418048345812
ADAM15	Acute Lymphoblastic Leukemia	MR Egger	35.4907269269041	39	0.63072622757018			APOM	Acute lymphocytic leukaemia	MR Egger	9.53222374905629	9	0.389662525918723
ADAM15	Acute Lymphoblastic Leukemia	Inverse variance weighted	35.8494196892452	40	0.657577879735927			APOM	Acute lymphocytic leukaemia	Inverse variance weighted	11.1756696373256	10	0.343996579645667
ADAM19	Acute Lymphoblastic Leukemia	MR Egger	36.3636961580946	26	0.0851804705180037			PABPC3	Acute lymphocytic leukaemia	MR Egger	1.6092992455096	1	0.204590334558661
ADAM19	Acute Lymphoblastic Leukemia	Inverse variance weighted	36.3723471758285	27	0.107392098620897			PABPC3	Acute lymphocytic leukaemia	Inverse variance weighted	1.60983344534212	2	0.447125160398028
ADAM28	Acute Lymphoblastic Leukemia	MR Egger	5.4220989145997	14	0.979028269303926			SHISA2	Acute lymphocytic leukaemia	MR Egger	6.57376635808322	5	0.254317647613454
ADAM28	Acute Lymphoblastic Leukemia	Inverse variance weighted	5.6021812441308	15	0.985683804525409			SHISA2	Acute lymphocytic leukaemia	Inverse variance weighted	6.76345974259458	6	0.343277405956692
ADAMTS13	Acute Lymphoblastic Leukemia	MR Egger	6.88126142047085	5	0.229621890622656			NUCB1	Acute lymphocytic leukaemia	MR Egger	2.05501036724203	4	0.725641549205787
ADAMTS13	Acute Lymphoblastic Leukemia	Inverse variance weighted	8.12903013059787	6	0.228801862332229			NUCB1	Acute lymphocytic leukaemia	Inverse variance weighted	3.50662839078263	5	0.622384905978807
ADAMTSL4	Acute Lymphoblastic Leukemia	MR Egger	6.11792899449171	7	0.526048965085567			CEACAM20	Acute lymphocytic leukaemia	MR Egger	0.00101133243724507	1	0.974630387592322
ADAMTSL4	Acute Lymphoblastic Leukemia	Inverse variance weighted	8.78484959284862	8	0.360769762928969			CEACAM20	Acute lymphocytic leukaemia	Inverse variance weighted	1.83607308074216	2	0.399302285816116
ADAR	Acute Lymphoblastic Leukemia	MR Egger	4.10431452898032	6	0.662562138533792			IL31	Acute lymphocytic leukaemia	MR Egger	1.56706449206391	3	0.666880564162265
ADAR	Acute Lymphoblastic Leukemia	Inverse variance weighted	4.31819635425413	7	0.742484248981408			IL31	Acute lymphocytic leukaemia	Inverse variance weighted	2.8002286426887	4	0.591793246289464
ADARB2	Acute Lymphoblastic Leukemia	MR Egger	70.8223237364725	61	0.182676757053389			ANTXR1	Acute lymphocytic leukaemia	MR Egger	4.68418466808975	5	0.455624443713483
ADARB2	Acute Lymphoblastic Leukemia	Inverse variance weighted	70.8276489039072	62	0.206906066693603			ANTXR1	Acute lymphocytic leukaemia	Inverse variance weighted	4.75256375273197	6	0.575917587216522
ADIPOR1	Acute Lymphoblastic Leukemia	MR Egger	1.41236646473801	3	0.702638540631174			TMEM106A	Acute lymphocytic leukaemia	MR Egger	8.35021293807554	6	0.213551950422821
ADIPOR1	Acute Lymphoblastic Leukemia	Inverse variance weighted	1.62577609443312	4	0.804152084899552			TMEM106A	Acute lymphocytic leukaemia	Inverse variance weighted	9.19746342780137	7	0.238788244787643
ADK	Acute Lymphoblastic Leukemia	MR Egger	55.7920918988954	59	0.594500627313098			PGRMC2	Acute lymphocytic leukaemia	MR Egger	0.749869781326858	1	0.386517461903386
ADK	Acute Lymphoblastic Leukemia	Inverse variance weighted	56.3245635702431	60	0.610800109484009			PGRMC2	Acute lymphocytic leukaemia	Inverse variance weighted	1.07291747913339	2	0.584815574004404
ADO	Acute Lymphoblastic Leukemia	MR Egger	10.2095683576396	13	0.676713986794118			ACRV1	Acute lymphocytic leukaemia	MR Egger	0.884662584062618	4	0.926750836129098
ADO	Acute Lymphoblastic Leukemia	Inverse variance weighted	10.2487005377892	14	0.743783938709596			ACRV1	Acute lymphocytic leukaemia	Inverse variance weighted	2.69806909413334	5	0.746413745092514
ADRB1	Acute Lymphoblastic Leukemia	MR Egger	6.9516594240949	11	0.802984594270139			COL6A3	Acute lymphocytic leukaemia	MR Egger	2.69794928798321	1	0.100477410164149
ADRB1	Acute Lymphoblastic Leukemia	Inverse variance weighted	6.9517911678003	12	0.860782875523048			COL6A3	Acute lymphocytic leukaemia	Inverse variance weighted	2.70320382435951	2	0.258825312958491
ADSS	Acute Lymphoblastic Leukemia	MR Egger	33.1503443291168	38	0.693039799513671			CSF2RB	Acute lymphocytic leukaemia	MR Egger	3.30502720863879	6	0.769702894851356
ADSS	Acute Lymphoblastic Leukemia	Inverse variance weighted	34.2394348078736	39	0.686622104563463			CSF2RB	Acute lymphocytic leukaemia	Inverse variance weighted	4.3271618142889	7	0.74141736830262
ADTRP	Acute Lymphoblastic Leukemia	MR Egger	9.86407396086266	13	0.705009959650407			PTGDS	Acute lymphocytic leukaemia	MR Egger	1.39243084427792	2	0.498468230331872
ADTRP	Acute Lymphoblastic Leukemia	Inverse variance weighted	9.97428718891411	14	0.764060935467967			PTGDS	Acute lymphocytic leukaemia	Inverse variance weighted	1.82288817991932	3	0.60996692263667
AEN	Acute Lymphoblastic Leukemia	MR Egger	11.8412445922475	11	0.375693971668657			MXRA8	Acute lymphocytic leukaemia	MR Egger	5.94161815932044	9	0.745746893829021
AEN	Acute Lymphoblastic Leukemia	Inverse variance weighted	13.4004444658346	12	0.340618672378977			MXRA8	Acute lymphocytic leukaemia	Inverse variance weighted	6.39920865045433	10	0.780682974404364
AFF4	Acute Lymphoblastic Leukemia	MR Egger	2.2633047513121	5	0.811641046410657			DHX9	Acute lymphocytic leukaemia	MR Egger	4.35497569888398	3	0.225596672002157
AFF4	Acute Lymphoblastic Leukemia	Inverse variance weighted	3.00155248859562	6	0.808651951390436			DHX9	Acute lymphocytic leukaemia	Inverse variance weighted	5.06410222447526	4	0.280783222257116
AGAP1	Acute Lymphoblastic Leukemia	MR Egger	23.6262154380062	24	0.483129439467484			PSMB6	Acute lymphocytic leukaemia	MR Egger	0.0720484984565208	1	0.788377190410839
AGAP1	Acute Lymphoblastic Leukemia	Inverse variance weighted	24.7957435227846	25	0.473866458286341			PSMB6	Acute lymphocytic leukaemia	Inverse variance weighted	2.11511390452662	2	0.3473032531635
AGXT2L2	Acute Lymphoblastic Leukemia	MR Egger	3.34476184993123	3	0.341461061228271			CD99L2	Acute lymphocytic leukaemia	MR Egger	5.83554720029844	2	0.054053899023739
AGXT2L2	Acute Lymphoblastic Leukemia	Inverse variance weighted	3.88557171929775	4	0.421713478834631			CD99L2	Acute lymphocytic leukaemia	Inverse variance weighted	5.9193510825603	3	0.115600580117178
AHI1	Acute Lymphoblastic Leukemia	MR Egger	68.4881606286473	52	0.0622996091752499			TSPEAR	Acute lymphocytic leukaemia	MR Egger	0.731845937908114	2	0.693556224513497
AHI1	Acute Lymphoblastic Leukemia	Inverse variance weighted	68.533815881381	53	0.0741265270060154			TSPEAR	Acute lymphocytic leukaemia	Inverse variance weighted	2.67570830649255	3	0.44437121002946
AIMP2	Acute Lymphoblastic Leukemia	MR Egger	31.3898323809984	20	0.0502498880304549			BMPR1B	Acute lymphocytic leukaemia	MR Egger	4.34797540618812	2	0.113723217082556
AIMP2	Acute Lymphoblastic Leukemia	Inverse variance weighted	31.4297301494431	21	0.0667975115329552			BMPR1B	Acute lymphocytic leukaemia	Inverse variance weighted	4.97953367287514	3	0.17330193833216
AK3	Acute Lymphoblastic Leukemia	MR Egger	14.9985675703048	25	0.941416043897462			LAT	Acute lymphocytic leukaemia	MR Egger	1.56390633052461	2	0.457511542415048
AK3	Acute Lymphoblastic Leukemia	Inverse variance weighted	17.6326807470766	26	0.888725847775179			LAT	Acute lymphocytic leukaemia	Inverse variance weighted	1.77501828028316	3	0.620386267822396
AK5	Acute Lymphoblastic Leukemia	MR Egger	22.7210988648294	28	0.746867850406049			KLRC4	Acute lymphocytic leukaemia	MR Egger	1.37806494462026	1	0.240431032805766
AK5	Acute Lymphoblastic Leukemia	Inverse variance weighted	26.1381088471864	29	0.618100432114671			KLRC4	Acute lymphocytic leukaemia	Inverse variance weighted	2.67707018656862	2	0.262229529150022
AKAP12	Acute Lymphoblastic Leukemia	MR Egger	0.750514420816908	2	0.687112523567464			TEX29	Acute lymphocytic leukaemia	MR Egger	2.57867248995138	6	0.859561146389663
AKAP12	Acute Lymphoblastic Leukemia	Inverse variance weighted	0.801232283567512	3	0.849172264745676			TEX29	Acute lymphocytic leukaemia	Inverse variance weighted	4.76840279343214	7	0.688201857416184
AKAP6	Acute Lymphoblastic Leukemia	MR Egger	0.794427488090745	4	0.939193572713913			PCDH9	Acute lymphocytic leukaemia	MR Egger	29.222097780275	17	0.0325322808964768
AKAP6	Acute Lymphoblastic Leukemia	Inverse variance weighted	3.61953130799436	5	0.605383159614124			PCDH9	Acute lymphocytic leukaemia	Inverse variance weighted	31.4770183311287	18	0.0253347748344233
AKD1	Acute Lymphoblastic Leukemia	MR Egger	15.4653123586227	17	0.562003827324353			ITM2C	Acute lymphocytic leukaemia	MR Egger	2.27228905118305	1	0.131705245092998
AKD1	Acute Lymphoblastic Leukemia	Inverse variance weighted	15.5362161859533	18	0.624879568774327			ITM2C	Acute lymphocytic leukaemia	Inverse variance weighted	5.20473998486562	2	0.074097758823617
AKIP1	Acute Lymphoblastic Leukemia	MR Egger	43.8211820721247	59	0.930067766860453			PGLYRP3	Acute lymphocytic leukaemia	MR Egger	4.03986898400232	4	0.400637058620279
AKIP1	Acute Lymphoblastic Leukemia	Inverse variance weighted	48.3268112105713	60	0.860341089106708			PGLYRP3	Acute lymphocytic leukaemia	Inverse variance weighted	4.5074601153595	5	0.478885921172429
AKIRIN2	Acute Lymphoblastic Leukemia	MR Egger	2.21532869824725	3	0.528935410124494			SLITRK3	Acute lymphocytic leukaemia	MR Egger	32.5076040298766	22	0.0691443712601424
AKIRIN2	Acute Lymphoblastic Leukemia	Inverse variance weighted	4.48282792227648	4	0.344588502996971			SLITRK3	Acute lymphocytic leukaemia	Inverse variance weighted	33.3182998415054	23	0.0756786210449264
AKR1E2	Acute Lymphoblastic Leukemia	MR Egger	12.4650047915819	13	0.489931022748785			SCGB1A1	Acute lymphocytic leukaemia	MR Egger	7.37217710469686	7	0.391183694024449
AKR1E2	Acute Lymphoblastic Leukemia	Inverse variance weighted	14.3117	14	0.426756616413282			SCGB1A1	Acute lymphocytic leukaemia	Inverse variance weighted	7.51244276589145	8	0.482482229780398
AKT1	Acute Lymphoblastic Leukemia	MR Egger	8.60420933079035	13	0.802135769100568			MGAT1	Acute lymphocytic leukaemia	MR Egger	0.141598530124469	2	0.931648887840198
AKT1	Acute Lymphoblastic Leukemia	Inverse variance weighted	9.76533317412559	14	0.779131153825066			MGAT1	Acute lymphocytic leukaemia	Inverse variance weighted	1.27869962060588	3	0.734197169183943
AKTIP	Acute Lymphoblastic Leukemia	MR Egger	20.651900969148	28	0.839557137479487			CST8	Acute lymphocytic leukaemia	MR Egger	11.3924553373633	9	0.249764030911268
AKTIP	Acute Lymphoblastic Leukemia	Inverse variance weighted	21.9364868847225	29	0.822809738366119			CST8	Acute lymphocytic leukaemia	Inverse variance weighted	11.4813288292366	10	0.321266697264751
AL161915.1	Acute Lymphoblastic Leukemia	MR Egger	6.62713924386553	9	0.675875665637694			AXL	Acute lymphocytic leukaemia	MR Egger	3.60765617000609	5	0.607164120077668
AL161915.1	Acute Lymphoblastic Leukemia	Inverse variance weighted	6.63104165250186	10	0.759757051420614			AXL	Acute lymphocytic leukaemia	Inverse variance weighted	3.69945909744449	6	0.717270794943128
AL513477.1	Acute Lymphoblastic Leukemia	MR Egger	6.46807028870624	6	0.372845923375977			PUF60	Acute lymphocytic leukaemia	MR Egger	3.27436141535195	2	0.194527700376504
AL513477.1	Acute Lymphoblastic Leukemia	Inverse variance weighted	7.32030795338399	7	0.396308457117142			PUF60	Acute lymphocytic leukaemia	Inverse variance weighted	3.29491460026169	3	0.348351065089778
ALDH1A1	Acute Lymphoblastic Leukemia	MR Egger	26.9769154615098	34	0.798465006135703			SFTA2	Acute lymphocytic leukaemia	MR Egger	0.178959221110474	2	0.914406909183399
ALDH1A1	Acute Lymphoblastic Leukemia	Inverse variance weighted	28.8337785369354	35	0.759390774479925			SFTA2	Acute lymphocytic leukaemia	Inverse variance weighted	6.2631616220699	3	0.0994856723403272
ALG1L	Acute Lymphoblastic Leukemia	MR Egger	20.0866487157208	19	0.389381185773329			POMK	Acute lymphocytic leukaemia	MR Egger	5.43524714315986	4	0.245480213368051
ALG1L	Acute Lymphoblastic Leukemia	Inverse variance weighted	20.418373740819	20	0.432046901308374			POMK	Acute lymphocytic leukaemia	Inverse variance weighted	5.4805491493505	5	0.360083451820149
ALG1L10P	Acute Lymphoblastic Leukemia	MR Egger	4.27002709638448	4	0.370693370572127			NDUFS4	Acute lymphocytic leukaemia	MR Egger	27.3510814650833	20	0.125672388537909
ALG1L10P	Acute Lymphoblastic Leukemia	Inverse variance weighted	5.36535969609315	5	0.37293559643772			NDUFS4	Acute lymphocytic leukaemia	Inverse variance weighted	27.4514303643693	21	0.156405751061965
ALG1L6P	Acute Lymphoblastic Leukemia	MR Egger	5.51151805062578	5	0.356684537805336			CLGN	Acute lymphocytic leukaemia	MR Egger	7.33055425317917	10	0.693913353256713
ALG1L6P	Acute Lymphoblastic Leukemia	Inverse variance weighted	6.07189240807839	6	0.41518506465117			CLGN	Acute lymphocytic leukaemia	Inverse variance weighted	7.85050833142865	11	0.726629235731792
ALG8	Acute Lymphoblastic Leukemia	MR Egger	1.50253416806964	4	0.826192476610508			HTN3	Acute lymphocytic leukaemia	MR Egger	9.67788129398891	14	0.785334528845082
ALG8	Acute Lymphoblastic Leukemia	Inverse variance weighted	2.65797328771443	5	0.752538347279887			HTN3	Acute lymphocytic leukaemia	Inverse variance weighted	10.2832888519897	15	0.801551995202404
ALKBH8	Acute Lymphoblastic Leukemia	MR Egger	6.24336916340122	9	0.715335390642652			APMAP	Acute lymphocytic leukaemia	MR Egger	1.37135438704437	2	0.503748978496311
ALKBH8	Acute Lymphoblastic Leukemia	Inverse variance weighted	6.24385014490369	10	0.794376767970929			APMAP	Acute lymphocytic leukaemia	Inverse variance weighted	1.37494734759124	3	0.711417575390332
AMACR	Acute Lymphoblastic Leukemia	MR Egger	23.0352136127865	17	0.148107800241018			TOR1AIP1	Acute lymphocytic leukaemia	MR Egger	1.12855439855196	1	0.288083898427578
AMACR	Acute Lymphoblastic Leukemia	Inverse variance weighted	24.650638553464	18	0.134845865442477			TOR1AIP1	Acute lymphocytic leukaemia	Inverse variance weighted	1.62910416748666	2	0.442837637121685
AMIGO2	Acute Lymphoblastic Leukemia	MR Egger	9.67983492094201	13	0.719882296746331			HTN1	Acute lymphocytic leukaemia	MR Egger	0.0168203070161717	2	0.991625112898381
AMIGO2	Acute Lymphoblastic Leukemia	Inverse variance weighted	9.79146571455214	14	0.777265235056859			HTN1	Acute lymphocytic leukaemia	Inverse variance weighted	2.71410345928869	3	0.43783587747968
ANGPTL6	Acute Lymphoblastic Leukemia	MR Egger	6.05013906080727	7	0.533907235009075			PLOD3	Acute lymphocytic leukaemia	MR Egger	5.04240596601796	9	0.830596060560749
ANGPTL6	Acute Lymphoblastic Leukemia	Inverse variance weighted	6.08404887718069	8	0.637817574864928			PLOD3	Acute lymphocytic leukaemia	Inverse variance weighted	5.0873870643845	10	0.885264490395326
ANK1	Acute Lymphoblastic Leukemia	MR Egger	7.20270922269381	9	0.616023541834114			MPZ	Acute lymphocytic leukaemia	MR Egger	29.7424878845991	18	0.040026550899538
ANK1	Acute Lymphoblastic Leukemia	Inverse variance weighted	7.87075527063161	10	0.641459786377362			MPZ	Acute lymphocytic leukaemia	Inverse variance weighted	29.8755951851695	19	0.0534032119339397
ANKMY2	Acute Lymphoblastic Leukemia	MR Egger	6.28136196250341	8	0.615747299257057			MSMB	Acute lymphocytic leukaemia	MR Egger	27.0234532098752	18	0.0785566469819188
ANKMY2	Acute Lymphoblastic Leukemia	Inverse variance weighted	7.2822081224558	9	0.607763248742372			MSMB	Acute lymphocytic leukaemia	Inverse variance weighted	28.1346637033923	19	0.080871052761981
ANKRA2	Acute Lymphoblastic Leukemia	MR Egger	31.0812868174885	22	0.0944641518515403			PRR16	Acute lymphocytic leukaemia	MR Egger	0.00644049631442029	2	0.996784931280703
ANKRA2	Acute Lymphoblastic Leukemia	Inverse variance weighted	31.0829319552086	23	0.120769268965821			PRR16	Acute lymphocytic leukaemia	Inverse variance weighted	0.0828969717394134	3	0.993807701143121
ANKRD10-IT1	Acute Lymphoblastic Leukemia	MR Egger	2.48980167824171	3	0.477136968188605			APLP2	Acute lymphocytic leukaemia	MR Egger	13.9206	5	0.0161214109138025
ANKRD10-IT1	Acute Lymphoblastic Leukemia	Inverse variance weighted	2.6846747951221	4	0.611898977890628			APLP2	Acute lymphocytic leukaemia	Inverse variance weighted	13.922740951069	6	0.0305111981010853
ANKRD10	Acute Lymphoblastic Leukemia	MR Egger	29.1409096499621	32	0.611999059160237			HTATIP2	Acute lymphocytic leukaemia	MR Egger	8.34880724406297	7	0.302843291394413
ANKRD10	Acute Lymphoblastic Leukemia	Inverse variance weighted	30.0572723357974	33	0.61439359033928			HTATIP2	Acute lymphocytic leukaemia	Inverse variance weighted	8.62568106892667	8	0.374849695134713
ANKRD18A	Acute Lymphoblastic Leukemia	MR Egger	0.258314558741815	3	0.967667739078286			OLFM3	Acute lymphocytic leukaemia	MR Egger	9.58961071715277	4	0.0479381581712809
ANKRD18A	Acute Lymphoblastic Leukemia	Inverse variance weighted	1.42017683922509	4	0.840680712698479			OLFM3	Acute lymphocytic leukaemia	Inverse variance weighted	10.9706562361276	5	0.0519648979365674
ANKRD26	Acute Lymphoblastic Leukemia	MR Egger	19.9887220356298	15	0.172365752877982			ASCC1	Acute lymphocytic leukaemia	MR Egger	3.50797047299496	3	0.319729847568672
ANKRD26	Acute Lymphoblastic Leukemia	Inverse variance weighted	20.2485655416533	16	0.209233437800587			ASCC1	Acute lymphocytic leukaemia	Inverse variance weighted	4.03684761184034	4	0.401042035955757
ANKRD34B	Acute Lymphoblastic Leukemia	MR Egger	98.7396114575901	69	0.0109066179957206			GNPTG	Acute lymphocytic leukaemia	MR Egger	3.15892947241909	10	0.977432474771413
ANKRD34B	Acute Lymphoblastic Leukemia	Inverse variance weighted	100.356608702622	70	0.0101224497044248			GNPTG	Acute lymphocytic leukaemia	Inverse variance weighted	4.58456028220296	11	0.949607668735675
ANKRD36	Acute Lymphoblastic Leukemia	MR Egger	8.27965536844044	15	0.912082041324058			SFTPB	Acute lymphocytic leukaemia	MR Egger	4.06192794845561	6	0.668296044177601
ANKRD36	Acute Lymphoblastic Leukemia	Inverse variance weighted	9.45628791067034	16	0.893440441622114			SFTPB	Acute lymphocytic leukaemia	Inverse variance weighted	4.99830416585138	7	0.660170191863815
ANKRD9	Acute Lymphoblastic Leukemia	MR Egger	21.8341780661681	18	0.239430392548926			TMX2	Acute lymphocytic leukaemia	MR Egger	7.14476152312641	4	0.128433150714313
ANKRD9	Acute Lymphoblastic Leukemia	Inverse variance weighted	21.8342340792486	19	0.29258371532451			TMX2	Acute lymphocytic leukaemia	Inverse variance weighted	7.16867356737334	5	0.208395052672279
ANKZF1	Acute Lymphoblastic Leukemia	MR Egger	0.0452381547788639	2	0.977634816060197			NDUFB4	Acute lymphocytic leukaemia	MR Egger	19.9186935386925	12	0.0686397242502949
ANKZF1	Acute Lymphoblastic Leukemia	Inverse variance weighted	2.07484315771176	3	0.557018905520162			NDUFB4	Acute lymphocytic leukaemia	Inverse variance weighted	20.5841898136129	13	0.0815705152108749
ANO9	Acute Lymphoblastic Leukemia	MR Egger	17.8875953019869	23	0.763557566690855			KLRG2	Acute lymphocytic leukaemia	MR Egger	0.590053898011119	3	0.898705483647018
ANO9	Acute Lymphoblastic Leukemia	Inverse variance weighted	19.0394099801492	24	0.749884595760852			KLRG2	Acute lymphocytic leukaemia	Inverse variance weighted	2.5227676216872	4	0.640563590962985
ANXA3	Acute Lymphoblastic Leukemia	MR Egger	17.291699183928	16	0.366968505124393			IGSF11	Acute lymphocytic leukaemia	MR Egger	2.99093607397498	1	0.0837317536323395
ANXA3	Acute Lymphoblastic Leukemia	Inverse variance weighted	17.5364385740501	17	0.418632830372909			IGSF11	Acute lymphocytic leukaemia	Inverse variance weighted	7.15686354081471	2	0.0279194480460585
ANXA5	Acute Lymphoblastic Leukemia	MR Egger	49.1984254579544	60	0.839025528088019			COL28A1	Acute lymphocytic leukaemia	MR Egger	4.09141626434603	3	0.251760521644588
ANXA5	Acute Lymphoblastic Leukemia	Inverse variance weighted	58.3818211473377	61	0.571382716216241			COL28A1	Acute lymphocytic leukaemia	Inverse variance weighted	5.20700138351802	4	0.266709586273365
ANXA9	Acute Lymphoblastic Leukemia	MR Egger	0.341564333491184	1	0.558927647802693			SUDS3	Acute lymphocytic leukaemia	MR Egger	0.759926486612534	2	0.683886546158703
ANXA9	Acute Lymphoblastic Leukemia	Inverse variance weighted	0.799753916415016	2	0.670402528489937			SUDS3	Acute lymphocytic leukaemia	Inverse variance weighted	0.982446086631695	3	0.805499380002618
AP001007.1	Acute Lymphoblastic Leukemia	MR Egger	37.0652889160199	42	0.687057440686097			GNRH2	Acute lymphocytic leukaemia	MR Egger	0.0682785798513934	2	0.966436880340567
AP001007.1	Acute Lymphoblastic Leukemia	Inverse variance weighted	37.9348204033723	43	0.690246330622706			GNRH2	Acute lymphocytic leukaemia	Inverse variance weighted	0.117637238066328	3	0.989639973222903
AP001189.4	Acute Lymphoblastic Leukemia	MR Egger	30.7182067168058	35	0.674957096443186			ACE	Acute lymphocytic leukaemia	MR Egger	17.4554920071509	16	0.356730454017712
AP001189.4	Acute Lymphoblastic Leukemia	Inverse variance weighted	31.6993575469325	36	0.673311570941365			ACE	Acute lymphocytic leukaemia	Inverse variance weighted	18.0114329021481	17	0.388119947384877
AP001469.9	Acute Lymphoblastic Leukemia	MR Egger	12.0021585830935	19	0.885533044810308			PSMD5	Acute lymphocytic leukaemia	MR Egger	0.0120523598321272	2	0.993991941087712
AP001469.9	Acute Lymphoblastic Leukemia	Inverse variance weighted	12.0698806375693	20	0.913649735014382			PSMD5	Acute lymphocytic leukaemia	Inverse variance weighted	0.0990712276849378	3	0.991948646634413
AP001610.5	Acute Lymphoblastic Leukemia	MR Egger	6.11852476791329	9	0.72799972002739			HS3ST5	Acute lymphocytic leukaemia	MR Egger	1.91298667675169	5	0.861049259014776
AP001610.5	Acute Lymphoblastic Leukemia	Inverse variance weighted	6.18677596020008	10	0.799334551484884			HS3ST5	Acute lymphocytic leukaemia	Inverse variance weighted	2.12874819893204	6	0.90748482522992
AP001625.6	Acute Lymphoblastic Leukemia	MR Egger	5.3517110574146	5	0.374480339010721			GAL3ST2	Acute lymphocytic leukaemia	MR Egger	16.3971714013351	7	0.0217253815943297
AP001625.6	Acute Lymphoblastic Leukemia	Inverse variance weighted	6.08362509342925	6	0.41388789807492			GAL3ST2	Acute lymphocytic leukaemia	Inverse variance weighted	18.7183074516377	8	0.0164409404496325
AP001816.1	Acute Lymphoblastic Leukemia	MR Egger	58.430175272057	68	0.789504271805639			PCDHB2	Acute lymphocytic leukaemia	MR Egger	9.76743975140998	6	0.134793480216361
AP001816.1	Acute Lymphoblastic Leukemia	Inverse variance weighted	59.3099438962684	69	0.790889998330272			PCDHB2	Acute lymphocytic leukaemia	Inverse variance weighted	10.2877979223699	7	0.172842371033564
AP002954.4	Acute Lymphoblastic Leukemia	MR Egger	25.5930163179182	42	0.978388647323175			CDYL2	Acute lymphocytic leukaemia	MR Egger	2.03547896874285	3	0.565075662781309
AP002954.4	Acute Lymphoblastic Leukemia	Inverse variance weighted	26.8389455607435	43	0.974531449778624			CDYL2	Acute lymphocytic leukaemia	Inverse variance weighted	2.50826683961712	4	0.643156101577738
AP1S3	Acute Lymphoblastic Leukemia	MR Egger	1.29545938502559	6	0.971907486054306			ADAM7	Acute lymphocytic leukaemia	MR Egger	0.00083855253402792	1	0.976898269866964
AP1S3	Acute Lymphoblastic Leukemia	Inverse variance weighted	1.34395012267753	7	0.987226509491395			ADAM7	Acute lymphocytic leukaemia	Inverse variance weighted	1.95395298471538	2	0.376447572028923
AP5S1	Acute Lymphoblastic Leukemia	MR Egger	0.49652666462708	1	0.481030264223021			PROK2	Acute lymphocytic leukaemia	MR Egger	3.78979182756911	12	0.9869376908945
AP5S1	Acute Lymphoblastic Leukemia	Inverse variance weighted	0.98561244898397	2	0.610909636922364			PROK2	Acute lymphocytic leukaemia	Inverse variance weighted	3.8111488170408	13	0.993039323298207
APBB1IP	Acute Lymphoblastic Leukemia	MR Egger	18.1434377436528	23	0.749663084113305			KERA	Acute lymphocytic leukaemia	MR Egger	4.2214297642356	4	0.37686723449213
APBB1IP	Acute Lymphoblastic Leukemia	Inverse variance weighted	19.8173043699804	24	0.707116822919942			KERA	Acute lymphocytic leukaemia	Inverse variance weighted	5.42494040072713	5	0.366246651131662
APCDD1	Acute Lymphoblastic Leukemia	MR Egger	16.6383251596077	20	0.676318314672917			GRIA4	Acute lymphocytic leukaemia	MR Egger	6.1584352667775	6	0.405678287843424
APCDD1	Acute Lymphoblastic Leukemia	Inverse variance weighted	17.3762927580439	21	0.688059087757307			GRIA4	Acute lymphocytic leukaemia	Inverse variance weighted	6.15869236865259	7	0.521346862158379
ARF3	Acute Lymphoblastic Leukemia	MR Egger	19.5564309558865	28	0.880091514682084			TMED2	Acute lymphocytic leukaemia	MR Egger	0.869688861942942	1	0.351041459197398
ARF3	Acute Lymphoblastic Leukemia	Inverse variance weighted	21.0087140191952	29	0.858831755223294			TMED2	Acute lymphocytic leukaemia	Inverse variance weighted	1.32410458952899	2	0.515791690926299
ARFGAP3	Acute Lymphoblastic Leukemia	MR Egger	18.1590320262884	13	0.151573934979204			KLRG2	Acute lymphocytic leukaemia	MR Egger	1.54796477483376	2	0.461172837582066
ARFGAP3	Acute Lymphoblastic Leukemia	Inverse variance weighted	18.2349698259468	14	0.19628770077357			KLRG2	Acute lymphocytic leukaemia	Inverse variance weighted	3.47942792393374	3	0.323440067971042
ARHGAP11A	Acute Lymphoblastic Leukemia	MR Egger	5.65020920427876	7	0.581133024494838			CSGALNACT2	Acute lymphocytic leukaemia	MR Egger	1.74663084142931	4	0.782230670070169
ARHGAP11A	Acute Lymphoblastic Leukemia	Inverse variance weighted	6.75634150162287	8	0.563135338203058			CSGALNACT2	Acute lymphocytic leukaemia	Inverse variance weighted	2.50436384375118	5	0.775837724636159
ARHGAP15	Acute Lymphoblastic Leukemia	MR Egger	44.864428973349	51	0.714638080104804			CLEC4G	Acute lymphocytic leukaemia	MR Egger	13.1224845325782	3	0.00437907538718442
ARHGAP15	Acute Lymphoblastic Leukemia	Inverse variance weighted	46.3939919346503	52	0.693141876677012			CLEC4G	Acute lymphocytic leukaemia	Inverse variance weighted	14.7400413537957	4	0.00527190067508795
ARHGAP18	Acute Lymphoblastic Leukemia	MR Egger	0.900231214607752	3	0.825372011269496			SERPINH1	Acute lymphocytic leukaemia	MR Egger	1.35518902754927	5	0.929151634352501
ARHGAP18	Acute Lymphoblastic Leukemia	Inverse variance weighted	1.9644040327854	4	0.742306045839708			SERPINH1	Acute lymphocytic leukaemia	Inverse variance weighted	2.91269131850518	6	0.819722557555263
ARHGEF17	Acute Lymphoblastic Leukemia	MR Egger	20.5841866815143	20	0.421959506228133			KLRB1	Acute lymphocytic leukaemia	MR Egger	4.75178956574632	7	0.690223339253989
ARHGEF17	Acute Lymphoblastic Leukemia	Inverse variance weighted	21.1741893679342	21	0.448351321084842			KLRB1	Acute lymphocytic leukaemia	Inverse variance weighted	4.75193769532873	8	0.783730452404157
ARHGEF35	Acute Lymphoblastic Leukemia	MR Egger	9.2250453604864	12	0.683597856076493			CD1A	Acute lymphocytic leukaemia	MR Egger	5.04178039018564	5	0.410802577062831
ARHGEF35	Acute Lymphoblastic Leukemia	Inverse variance weighted	9.26417972699748	13	0.752711351478845			CD1A	Acute lymphocytic leukaemia	Inverse variance weighted	5.46547145752934	6	0.485639734069548
ARHGEF40	Acute Lymphoblastic Leukemia	MR Egger	4.46779741621595	4	0.346382969288186			HABP4	Acute lymphocytic leukaemia	MR Egger	2.93531117423249	3	0.401706832448797
ARHGEF40	Acute Lymphoblastic Leukemia	Inverse variance weighted	6.20987539909877	5	0.286329537017409			HABP4	Acute lymphocytic leukaemia	Inverse variance weighted	3.06136187784408	4	0.547609670148843
ARHGEF5	Acute Lymphoblastic Leukemia	MR Egger	0.977347448701049	1	0.322854556904801			PILRA	Acute lymphocytic leukaemia	MR Egger	22.2270238015747	24	0.565718563849419
ARHGEF5	Acute Lymphoblastic Leukemia	Inverse variance weighted	1.20478556754893	2	0.547500018350566			PILRA	Acute lymphocytic leukaemia	Inverse variance weighted	22.4664175224356	25	0.608690089279876
ARID5A	Acute Lymphoblastic Leukemia	MR Egger	13.7240609219989	15	0.546551563949756			TOMM20L	Acute lymphocytic leukaemia	MR Egger	12.4508271352967	6	0.05263477392632
ARID5A	Acute Lymphoblastic Leukemia	Inverse variance weighted	15.7788647587488	16	0.468498208955333			TOMM20L	Acute lymphocytic leukaemia	Inverse variance weighted	12.9564103996599	7	0.0731775925640875
ARL6IP5	Acute Lymphoblastic Leukemia	MR Egger	4.30444995532581	6	0.635550135937048			SMPD1	Acute lymphocytic leukaemia	MR Egger	32.6583178436451	29	0.291733453602893
ARL6IP5	Acute Lymphoblastic Leukemia	Inverse variance weighted	5.47328196815271	7	0.602408498727403			SMPD1	Acute lymphocytic leukaemia	Inverse variance weighted	33.1267775892215	30	0.317066624135542
ARMC2	Acute Lymphoblastic Leukemia	MR Egger	2.6639282540896	7	0.914255852513872			B4GALT6	Acute lymphocytic leukaemia	MR Egger	16.1756939385686	17	0.511415684769588
ARMC2	Acute Lymphoblastic Leukemia	Inverse variance weighted	2.67570886885705	8	0.953033552421256			B4GALT6	Acute lymphocytic leukaemia	Inverse variance weighted	16.8247394183405	18	0.535184293458642
ARMC5	Acute Lymphoblastic Leukemia	MR Egger	3.29504812185433	7	0.856433093720005			HHIP	Acute lymphocytic leukaemia	MR Egger	2.64875192732123	5	0.753944744576198
ARMC5	Acute Lymphoblastic Leukemia	Inverse variance weighted	3.77061647264462	8	0.877203510373352			HHIP	Acute lymphocytic leukaemia	Inverse variance weighted	3.25607691397563	6	0.776087864407545
ARPC5	Acute Lymphoblastic Leukemia	MR Egger	32.3308104944629	51	0.980821149502565			A4GNT	Acute lymphocytic leukaemia	MR Egger	1.72267282255193	2	0.422596941453801
ARPC5	Acute Lymphoblastic Leukemia	Inverse variance weighted	32.5431735942313	52	0.98418612185157			A4GNT	Acute lymphocytic leukaemia	Inverse variance weighted	5.98207131060555	3	0.112485760325712
ARPP19	Acute Lymphoblastic Leukemia	MR Egger	9.70625857694161	11	0.556986927057779			GCNT4	Acute lymphocytic leukaemia	MR Egger	3.38743125894125	2	0.183835189964897
ARPP19	Acute Lymphoblastic Leukemia	Inverse variance weighted	13.4401783716881	12	0.337874388207319			GCNT4	Acute lymphocytic leukaemia	Inverse variance weighted	4.53443181135061	3	0.209239533879089
ARRB1	Acute Lymphoblastic Leukemia	MR Egger	8.68746927855518	12	0.729367424381584			SIGLEC15	Acute lymphocytic leukaemia	MR Egger	3.04186782366223	3	0.385214919718462
ARRB1	Acute Lymphoblastic Leukemia	Inverse variance weighted	9.61175546784216	13	0.725332321480129			SIGLEC15	Acute lymphocytic leukaemia	Inverse variance weighted	3.87540065219995	4	0.423131085630524
ARSB	Acute Lymphoblastic Leukemia	MR Egger	41.6574187823858	44	0.572535364688558			BTNL3	Acute lymphocytic leukaemia	MR Egger	0.00107513787516211	1	0.973842614872222
ARSB	Acute Lymphoblastic Leukemia	Inverse variance weighted	42.449055237338	45	0.580614759532499			BTNL3	Acute lymphocytic leukaemia	Inverse variance weighted	6.09666082100052	2	0.0474380603979636
ASB6	Acute Lymphoblastic Leukemia	MR Egger	1.78252952996712	1	0.18183902126453			EBI3	Acute lymphocytic leukaemia	MR Egger	15.713708520613	18	0.612519955230816
ASB6	Acute Lymphoblastic Leukemia	Inverse variance weighted	1.87272013795443	2	0.392052284610595			EBI3	Acute lymphocytic leukaemia	Inverse variance weighted	15.7447861727632	19	0.674232384896337
ASL	Acute Lymphoblastic Leukemia	MR Egger	10.0032193368321	14	0.7619480548705			HNRNPDL	Acute lymphocytic leukaemia	MR Egger	0.238273812881888	2	0.887686262475582
ASL	Acute Lymphoblastic Leukemia	Inverse variance weighted	13.1825537642655	15	0.588199905451206			HNRNPDL	Acute lymphocytic leukaemia	Inverse variance weighted	0.96348111717566	3	0.810087457153779
ASPDH	Acute Lymphoblastic Leukemia	MR Egger	12.9535359859734	10	0.226281289817315			FAM163B	Acute lymphocytic leukaemia	MR Egger	9.69416681179509	4	0.0459068731143598
ASPDH	Acute Lymphoblastic Leukemia	Inverse variance weighted	13.3310483995818	11	0.272239985943785			FAM163B	Acute lymphocytic leukaemia	Inverse variance weighted	9.96100510219199	5	0.0763477193814974
ASUN	Acute Lymphoblastic Leukemia	MR Egger	0.108233952617362	1	0.742163783569943			DSC1	Acute lymphocytic leukaemia	MR Egger	4.49182050918198	5	0.48097857136777
ASUN	Acute Lymphoblastic Leukemia	Inverse variance weighted	1.75043248258088	2	0.41677188664303			DSC1	Acute lymphocytic leukaemia	Inverse variance weighted	6.6056007488909	6	0.358864380587601
ATF3	Acute Lymphoblastic Leukemia	MR Egger	2.9798315628381	3	0.394745216765613			C6orf89	Acute lymphocytic leukaemia	MR Egger	1.64068016295812	4	0.801462784848117
ATF3	Acute Lymphoblastic Leukemia	Inverse variance weighted	3.99041453168083	4	0.407304656122865			C6orf89	Acute lymphocytic leukaemia	Inverse variance weighted	1.7331493436734	5	0.884697324557709
ATF5	Acute Lymphoblastic Leukemia	MR Egger	2.91235790170519	9	0.967668422908085			MRAP2	Acute lymphocytic leukaemia	MR Egger	1.77439533541633	2	0.411808160589799
ATF5	Acute Lymphoblastic Leukemia	Inverse variance weighted	3.12905995533972	10	0.978221493891546			MRAP2	Acute lymphocytic leukaemia	Inverse variance weighted	3.70645857118592	3	0.294955653808695
ATG10	Acute Lymphoblastic Leukemia	MR Egger	49.3378632369958	36	0.0684083110815064			OSMR	Acute lymphocytic leukaemia	MR Egger	0.592305117331842	3	0.898191659583117
ATG10	Acute Lymphoblastic Leukemia	Inverse variance weighted	54.7853786275069	37	0.0299738683895617			OSMR	Acute lymphocytic leukaemia	Inverse variance weighted	1.39556566840861	4	0.844965357467805
ATG16L1	Acute Lymphoblastic Leukemia	MR Egger	9.91879500396287	8	0.2707717897477			STMN2	Acute lymphocytic leukaemia	MR Egger	4.93085627642534	2	0.0849724546279131
ATG16L1	Acute Lymphoblastic Leukemia	Inverse variance weighted	10.8158680469154	9	0.288541769846753			STMN2	Acute lymphocytic leukaemia	Inverse variance weighted	5.00680910827581	3	0.171299226397062
ATG9A	Acute Lymphoblastic Leukemia	MR Egger	6.76416592036002	5	0.238778670248041			ASPRV1	Acute lymphocytic leukaemia	MR Egger	8.08101419402424	10	0.620923730947797
ATG9A	Acute Lymphoblastic Leukemia	Inverse variance weighted	7.44088417021406	6	0.281989877440536			ASPRV1	Acute lymphocytic leukaemia	Inverse variance weighted	9.70789762043294	11	0.556837612599576
ATOX1	Acute Lymphoblastic Leukemia	MR Egger	20.0003107024658	24	0.696758477076506			STX8	Acute lymphocytic leukaemia	MR Egger	0.110497223404267	2	0.946249869917455
ATOX1	Acute Lymphoblastic Leukemia	Inverse variance weighted	20.8150413808462	25	0.702876341983331			STX8	Acute lymphocytic leukaemia	Inverse variance weighted	2.33018147634205	3	0.506763608041388
ATP5G1	Acute Lymphoblastic Leukemia	MR Egger	10.6884105417386	22	0.978915921656763			NTM	Acute lymphocytic leukaemia	MR Egger	15.2778559443154	10	0.122255316459987
ATP5G1	Acute Lymphoblastic Leukemia	Inverse variance weighted	13.8346303932529	23	0.931509083607312			NTM	Acute lymphocytic leukaemia	Inverse variance weighted	15.3374012403976	11	0.167565684636598
ATP6AP1L	Acute Lymphoblastic Leukemia	MR Egger	62.9415002523575	51	0.121840812674888			GALNT13	Acute lymphocytic leukaemia	MR Egger	2.2139981382668	2	0.330549430155148
ATP6AP1L	Acute Lymphoblastic Leukemia	Inverse variance weighted	63.1350848843237	52	0.138568107711558			GALNT13	Acute lymphocytic leukaemia	Inverse variance weighted	2.21421689987457	3	0.529153516764377
ATP6V0A1	Acute Lymphoblastic Leukemia	MR Egger	0.509895329179566	1	0.475184170788815			PLA2R1	Acute lymphocytic leukaemia	MR Egger	17.9428832715624	22	0.709369349370495
ATP6V0A1	Acute Lymphoblastic Leukemia	Inverse variance weighted	1.77717746353613	2	0.411235707309931			PLA2R1	Acute lymphocytic leukaemia	Inverse variance weighted	19.0984343599262	23	0.695496713123888
ATP7B	Acute Lymphoblastic Leukemia	MR Egger	14.7015067260185	18	0.682350478584377			CYB5D2	Acute lymphocytic leukaemia	MR Egger	7.27869	5	0.200724805570521
ATP7B	Acute Lymphoblastic Leukemia	Inverse variance weighted	16.2017782061984	19	0.643775539176712			CYB5D2	Acute lymphocytic leukaemia	Inverse variance weighted	7.53335275373687	6	0.274321572318791
ATP8B2	Acute Lymphoblastic Leukemia	MR Egger	2.46536365220577	7	0.929682554804824			CALN1	Acute lymphocytic leukaemia	MR Egger	2.90107239828087	2	0.234444545421519
ATP8B2	Acute Lymphoblastic Leukemia	Inverse variance weighted	4.22759000266979	8	0.836027768444608			CALN1	Acute lymphocytic leukaemia	Inverse variance weighted	2.95333076652484	3	0.398876765373265
ATPAF1	Acute Lymphoblastic Leukemia	MR Egger	5.25584741187608	7	0.628772409356692			CD58	Acute lymphocytic leukaemia	MR Egger	0.584261286414456	1	0.44464686329874
ATPAF1	Acute Lymphoblastic Leukemia	Inverse variance weighted	6.35933927480171	8	0.607048372957124			CD58	Acute lymphocytic leukaemia	Inverse variance weighted	3.08897001856954	2	0.2134217531477
ATPIF1	Acute Lymphoblastic Leukemia	MR Egger	13.9150941402703	13	0.379850570146865			PLEKHA4	Acute lymphocytic leukaemia	MR Egger	1.31350977335016	2	0.518531300009229
ATPIF1	Acute Lymphoblastic Leukemia	Inverse variance weighted	14.3675842657211	14	0.422700169871801			PLEKHA4	Acute lymphocytic leukaemia	Inverse variance weighted	2.35245716816857	3	0.502546055727947
ATRAID	Acute Lymphoblastic Leukemia	MR Egger	21.5253986996544	23	0.549035230096245			SRL	Acute lymphocytic leukaemia	MR Egger	9.46459499343918	4	0.0504798472316697
ATRAID	Acute Lymphoblastic Leukemia	Inverse variance weighted	21.5737484538876	24	0.604691633649509			SRL	Acute lymphocytic leukaemia	Inverse variance weighted	9.53431531735307	5	0.089558139502814
AVPI1	Acute Lymphoblastic Leukemia	MR Egger	10.4453043878926	7	0.164711172207094			STX6	Acute lymphocytic leukaemia	MR Egger	0.0591149948617505	1	0.807900234411925
AVPI1	Acute Lymphoblastic Leukemia	Inverse variance weighted	10.4828644006238	8	0.232756030985919			STX6	Acute lymphocytic leukaemia	Inverse variance weighted	1.63435071529956	2	0.441677475080147
B3GALTL	Acute Lymphoblastic Leukemia	MR Egger	18.6433621217503	24	0.770731920693533			PLD3	Acute lymphocytic leukaemia	MR Egger	3.51242350996174	3	0.319154404251913
B3GALTL	Acute Lymphoblastic Leukemia	Inverse variance weighted	18.6763897572524	25	0.812367215405725			PLD3	Acute lymphocytic leukaemia	Inverse variance weighted	6.7274543188791	4	0.151011299449586
BAG5	Acute Lymphoblastic Leukemia	MR Egger	8.88973158280449	12	0.712318868763956			CLEC2A	Acute lymphocytic leukaemia	MR Egger	6.68531356865873	4	0.153482233515427
BAG5	Acute Lymphoblastic Leukemia	Inverse variance weighted	14.5194352651122	13	0.338305366986809			CLEC2A	Acute lymphocytic leukaemia	Inverse variance weighted	6.73482	5	0.241120613286334
BAK1	Acute Lymphoblastic Leukemia	MR Egger	41.1499584172078	41	0.46405494014003			CLEC10A	Acute lymphocytic leukaemia	MR Egger	0.859617796945814	2	0.650633419883692
BAK1	Acute Lymphoblastic Leukemia	Inverse variance weighted	42.0467528401363	42	0.468948493414091			CLEC10A	Acute lymphocytic leukaemia	Inverse variance weighted	1.58555234312908	3	0.66267014789096
BAZ2B	Acute Lymphoblastic Leukemia	MR Egger	44.9982062567024	53	0.77472779041313			BET1L	Acute lymphocytic leukaemia	MR Egger	2.44619822228816	2	0.294316632127734
BAZ2B	Acute Lymphoblastic Leukemia	Inverse variance weighted	47.6737090745012	54	0.715469889662266			BET1L	Acute lymphocytic leukaemia	Inverse variance weighted	3.27085938136436	3	0.351719113097125
BCAS1	Acute Lymphoblastic Leukemia	MR Egger	13.4032118372977	8	0.0987089207366645			SPINK7	Acute lymphocytic leukaemia	MR Egger	5.23423945404121	6	0.514140299559115
BCAS1	Acute Lymphoblastic Leukemia	Inverse variance weighted	13.9620686813462	9	0.123680930517338			SPINK7	Acute lymphocytic leukaemia	Inverse variance weighted	6.09805530023247	7	0.528347809204572
BCAT2	Acute Lymphoblastic Leukemia	MR Egger	13.5951711804587	14	0.48028553049205			UCMA	Acute lymphocytic leukaemia	MR Egger	12.4307576134325	10	0.257261057174316
BCAT2	Acute Lymphoblastic Leukemia	Inverse variance weighted	13.6094289562928	15	0.555333028455186			UCMA	Acute lymphocytic leukaemia	Inverse variance weighted	12.546791482564	11	0.323975083960224
BCCIP	Acute Lymphoblastic Leukemia	MR Egger	3.0162367080855	7	0.883496149386202			LRRK2	Acute lymphocytic leukaemia	MR Egger	15.0528260282887	7	0.0353281830384323
BCCIP	Acute Lymphoblastic Leukemia	Inverse variance weighted	3.32654909585848	8	0.912226535468262			LRRK2	Acute lymphocytic leukaemia	Inverse variance weighted	16.275686116309	8	0.0385999373807467
BCKDK	Acute Lymphoblastic Leukemia	MR Egger	10.5803201763649	21	0.970349554663545			IL5	Acute lymphocytic leukaemia	MR Egger	0.141391498297088	1	0.706901574803867
BCKDK	Acute Lymphoblastic Leukemia	Inverse variance weighted	15.2682783629354	22	0.850469781046691			IL5	Acute lymphocytic leukaemia	Inverse variance weighted	0.459209062334288	2	0.794847877918751
BCL10	Acute Lymphoblastic Leukemia	MR Egger	20.5895203925765	21	0.484243952586709			N6AMT1	Acute lymphocytic leukaemia	MR Egger	1.25679799659816	1	0.262258057491279
BCL10	Acute Lymphoblastic Leukemia	Inverse variance weighted	20.9880146933002	22	0.521478958797505			N6AMT1	Acute lymphocytic leukaemia	Inverse variance weighted	1.51508143840511	2	0.468817965471296
BCL2L13	Acute Lymphoblastic Leukemia	MR Egger	19.9157866286177	19	0.399661584768188			PDXK	Acute lymphocytic leukaemia	MR Egger	4.4044213197456	4	0.354031545806498
BCL2L13	Acute Lymphoblastic Leukemia	Inverse variance weighted	19.916532401961	20	0.463161804879317			PDXK	Acute lymphocytic leukaemia	Inverse variance weighted	4.55261637468953	5	0.472874562775662
BCO2	Acute Lymphoblastic Leukemia	MR Egger	2.47451766772258	4	0.649204538630879			REG4	Acute lymphocytic leukaemia	MR Egger	5.06732109627325	8	0.750357129392346
BCO2	Acute Lymphoblastic Leukemia	Inverse variance weighted	5.21278523914986	5	0.390467519694287			REG4	Acute lymphocytic leukaemia	Inverse variance weighted	5.75959188862925	9	0.763717358573326
BECN1	Acute Lymphoblastic Leukemia	MR Egger	10.8390366719353	15	0.76391908393017			HSPB1	Acute lymphocytic leukaemia	MR Egger	3.1362115143912	7	0.872122053793956
BECN1	Acute Lymphoblastic Leukemia	Inverse variance weighted	10.8504	16	0.818624702214473			HSPB1	Acute lymphocytic leukaemia	Inverse variance weighted	3.64314579503537	8	0.887800682031886
BEGAIN	Acute Lymphoblastic Leukemia	MR Egger	47.4835479508414	43	0.294947547952839			CHI3L1	Acute lymphocytic leukaemia	MR Egger	3.32457199456958	8	0.912370155810892
BEGAIN	Acute Lymphoblastic Leukemia	Inverse variance weighted	47.539807570585	44	0.330564194416921			CHI3L1	Acute lymphocytic leukaemia	Inverse variance weighted	5.57598109312553	9	0.781490488967412
BIK	Acute Lymphoblastic Leukemia	MR Egger	5.67032266757758	11	0.894431162691776			SVEP1	Acute lymphocytic leukaemia	MR Egger	18.2849576752177	18	0.437034174116601
BIK	Acute Lymphoblastic Leukemia	Inverse variance weighted	10.723918387754	12	0.552715365082922			SVEP1	Acute lymphocytic leukaemia	Inverse variance weighted	19.0646173542578	19	0.452697902938694
BMP1	Acute Lymphoblastic Leukemia	MR Egger	8.03257357009514	10	0.625655072957649			TMEM119	Acute lymphocytic leukaemia	MR Egger	0.586170249197505	1	0.443903892498555
BMP1	Acute Lymphoblastic Leukemia	Inverse variance weighted	8.59907344211434	11	0.658845223642208			TMEM119	Acute lymphocytic leukaemia	Inverse variance weighted	1.80976488837524	2	0.40458944414833
BMP8A	Acute Lymphoblastic Leukemia	MR Egger	8.50645050010885	8	0.385623231977325			C11orf87	Acute lymphocytic leukaemia	MR Egger	3.11212602083183	8	0.927125083894091
BMP8A	Acute Lymphoblastic Leukemia	Inverse variance weighted	8.53622075781224	9	0.481136795094504			C11orf87	Acute lymphocytic leukaemia	Inverse variance weighted	7.88405681179714	9	0.545871513389275
BMPR2	Acute Lymphoblastic Leukemia	MR Egger	15.547530838425	18	0.624092518151073			SPATA20	Acute lymphocytic leukaemia	MR Egger	6.00452424105403	5	0.305778939024428
BMPR2	Acute Lymphoblastic Leukemia	Inverse variance weighted	15.5846584533684	19	0.68478463443598			SPATA20	Acute lymphocytic leukaemia	Inverse variance weighted	6.01428334261579	6	0.421591954165406
BNIPL	Acute Lymphoblastic Leukemia	MR Egger	20.5350397134473	25	0.71822722940391			RAB17	Acute lymphocytic leukaemia	MR Egger	11.0469459588835	7	0.136584329523224
BNIPL	Acute Lymphoblastic Leukemia	Inverse variance weighted	24.7727948897419	26	0.531863803706547			RAB17	Acute lymphocytic leukaemia	Inverse variance weighted	11.7415106656104	8	0.163115010154595
BRIP1	Acute Lymphoblastic Leukemia	MR Egger	1.41259872908116	1	0.234625468074958			NAT14	Acute lymphocytic leukaemia	MR Egger	0.885347878902197	1	0.346741110044665
BRIP1	Acute Lymphoblastic Leukemia	Inverse variance weighted	2.87679727358184	2	0.23730747002483			NAT14	Acute lymphocytic leukaemia	Inverse variance weighted	3.56142055448029	2	0.168518409959147
BRWD1	Acute Lymphoblastic Leukemia	MR Egger	10.4523399705098	12	0.57634128105414			TMEM132C	Acute lymphocytic leukaemia	MR Egger	3.02009097367633	2	0.220899929691496
BRWD1	Acute Lymphoblastic Leukemia	Inverse variance weighted	11.9365427151903	13	0.53285412429233			TMEM132C	Acute lymphocytic leukaemia	Inverse variance weighted	3.09834664438088	3	0.376709208343078
BST1	Acute Lymphoblastic Leukemia	MR Egger	57.722800109666	58	0.485563396412069			BMP15	Acute lymphocytic leukaemia	MR Egger	4.60501772268143	4	0.330276062664748
BST1	Acute Lymphoblastic Leukemia	Inverse variance weighted	57.9335095879919	59	0.514862245778133			BMP15	Acute lymphocytic leukaemia	Inverse variance weighted	4.81408549358682	5	0.438988364827887
BTBD1	Acute Lymphoblastic Leukemia	MR Egger	2.19459353588708	10	0.994619404422703			CACNB4	Acute lymphocytic leukaemia	MR Egger	0.914531230682504	1	0.338915001565553
BTBD1	Acute Lymphoblastic Leukemia	Inverse variance weighted	2.99510370146015	11	0.990790434905132			CACNB4	Acute lymphocytic leukaemia	Inverse variance weighted	1.34754043807558	2	0.509782956652487
BTBD17	Acute Lymphoblastic Leukemia	MR Egger	13.7676805726475	7	0.0554710644661398			MTRF1L	Acute lymphocytic leukaemia	MR Egger	0.888298503664241	1	0.345938814100142
BTBD17	Acute Lymphoblastic Leukemia	Inverse variance weighted	13.8066143914643	8	0.0869472877528435			MTRF1L	Acute lymphocytic leukaemia	Inverse variance weighted	2.84781238101856	2	0.240771677574942
BTG2	Acute Lymphoblastic Leukemia	MR Egger	21.5349498795237	24	0.607002187317213			CSF2RB	Acute lymphocytic leukaemia	MR Egger	2.57739015106843	2	0.275630225140679
BTG2	Acute Lymphoblastic Leukemia	Inverse variance weighted	22.3675585592392	25	0.614441372169032			CSF2RB	Acute lymphocytic leukaemia	Inverse variance weighted	2.79337810050272	3	0.424591160033129
BTN2A1	Acute Lymphoblastic Leukemia	MR Egger	22.7980462667538	32	0.884561890028094			COL1A1	Acute lymphocytic leukaemia	MR Egger	11.9890814019962	15	0.679855325462511
BTN2A1	Acute Lymphoblastic Leukemia	Inverse variance weighted	22.8711936511869	33	0.906425900435978			COL1A1	Acute lymphocytic leukaemia	Inverse variance weighted	12.3322437865661	16	0.72080962385015
BTN3A1	Acute Lymphoblastic Leukemia	MR Egger	20.279799613556	29	0.884016866505462			ANGPTL1	Acute lymphocytic leukaemia	MR Egger	2.53888267812344	7	0.924140811160827
BTN3A1	Acute Lymphoblastic Leukemia	Inverse variance weighted	20.4109325776702	30	0.905400526323015			ANGPTL1	Acute lymphocytic leukaemia	Inverse variance weighted	2.54375168117183	8	0.959659486586053
BTNL3	Acute Lymphoblastic Leukemia	MR Egger	43.5102658446199	41	0.365014274041014			OLFM3	Acute lymphocytic leukaemia	MR Egger	2.69852739761367	2	0.259431209848558
BTNL3	Acute Lymphoblastic Leukemia	Inverse variance weighted	45.2869553619473	42	0.3364958555104			OLFM3	Acute lymphocytic leukaemia	Inverse variance weighted	4.04282258085267	3	0.256877038051961
BTNL8	Acute Lymphoblastic Leukemia	MR Egger	21.1585250034127	22	0.510960235467109			KIAA1549L	Acute lymphocytic leukaemia	MR Egger	3.44740270553573	4	0.48592081228686
BTNL8	Acute Lymphoblastic Leukemia	Inverse variance weighted	23.8191563527771	23	0.413878454124116			KIAA1549L	Acute lymphocytic leukaemia	Inverse variance weighted	6.4548507830614	5	0.264439860806866
BYSL	Acute Lymphoblastic Leukemia	MR Egger	8.33938102130408	17	0.958741452248364			TLR1	Acute lymphocytic leukaemia	MR Egger	0.626898572625406	3	0.890247885848782
BYSL	Acute Lymphoblastic Leukemia	Inverse variance weighted	10.7613840789649	18	0.904206677645569			TLR1	Acute lymphocytic leukaemia	Inverse variance weighted	1.20562900063887	4	0.877170972814309
C10orf116	Acute Lymphoblastic Leukemia	MR Egger	0.640267861268741	2	0.726051789984836			KLK13	Acute lymphocytic leukaemia	MR Egger	18.0031672629862	11	0.0815071510786193
C10orf116	Acute Lymphoblastic Leukemia	Inverse variance weighted	2.49366082405951	3	0.476437803815443			KLK13	Acute lymphocytic leukaemia	Inverse variance weighted	19.1228149411778	12	0.085607361650728
C11orf1	Acute Lymphoblastic Leukemia	MR Egger	1.36383411787313	3	0.714033673789339			NFE2L1	Acute lymphocytic leukaemia	MR Egger	0.000426889226793666	1	0.983515842305537
C11orf1	Acute Lymphoblastic Leukemia	Inverse variance weighted	6.42069023320131	4	0.169856639149944			NFE2L1	Acute lymphocytic leukaemia	Inverse variance weighted	1.47084616349636	2	0.479302631876296
C11orf80	Acute Lymphoblastic Leukemia	MR Egger	12.4177878665668	17	0.774205343137038			COL6A5	Acute lymphocytic leukaemia	MR Egger	0.00658914665311133	1	0.935303927105267
C11orf80	Acute Lymphoblastic Leukemia	Inverse variance weighted	12.6803932583256	18	0.810199216432555			COL6A5	Acute lymphocytic leukaemia	Inverse variance weighted	0.0560846983587332	2	0.972347187823841
C12orf43	Acute Lymphoblastic Leukemia	MR Egger	43.5323309078109	31	0.0669291658410608			RNF122	Acute lymphocytic leukaemia	MR Egger	2.42955335449668	3	0.488156985774322
C12orf43	Acute Lymphoblastic Leukemia	Inverse variance weighted	47.5542051590171	32	0.0377876575574724			RNF122	Acute lymphocytic leukaemia	Inverse variance weighted	5.12881812248105	4	0.274333493718563
C12orf76	Acute Lymphoblastic Leukemia	MR Egger	21.0235980099087	12	0.0500359609898949			FAM162B	Acute lymphocytic leukaemia	MR Egger	0.415759595547836	1	0.519060543371702
C12orf76	Acute Lymphoblastic Leukemia	Inverse variance weighted	21.0238020761006	13	0.0724591823763943			FAM162B	Acute lymphocytic leukaemia	Inverse variance weighted	2.49086087693079	2	0.287816993958776
C14orf159	Acute Lymphoblastic Leukemia	MR Egger	34.1696412078699	35	0.508016830082353			MTMR1	Acute lymphocytic leukaemia	MR Egger	8.16244084933272	6	0.226442453750823
C14orf159	Acute Lymphoblastic Leukemia	Inverse variance weighted	34.6203759274462	36	0.534184474269471			MTMR1	Acute lymphocytic leukaemia	Inverse variance weighted	8.37886023897645	7	0.300374202655521
C16orf93	Acute Lymphoblastic Leukemia	MR Egger	1.86189731828209	6	0.931951460025589			MEGF10	Acute lymphocytic leukaemia	MR Egger	3.65690464237385	3	0.300974988943065
C16orf93	Acute Lymphoblastic Leukemia	Inverse variance weighted	1.87568565394075	7	0.966399217589065			MEGF10	Acute lymphocytic leukaemia	Inverse variance weighted	3.91606354100045	4	0.417484581573905
C17orf99	Acute Lymphoblastic Leukemia	MR Egger	1.33754870838175	6	0.969546913010357			MILR1	Acute lymphocytic leukaemia	MR Egger	2.13612572614793	3	0.544638926081189
C17orf99	Acute Lymphoblastic Leukemia	Inverse variance weighted	2.50220353431736	7	0.926931045295535			MILR1	Acute lymphocytic leukaemia	Inverse variance weighted	4.42485032616392	4	0.351551519285075
C19orf12	Acute Lymphoblastic Leukemia	MR Egger	33.487367925952	45	0.896870861059756			THSD7A	Acute lymphocytic leukaemia	MR Egger	4.75505689285456	3	0.190637193428105
C19orf12	Acute Lymphoblastic Leukemia	Inverse variance weighted	33.6544049860447	46	0.912013941336582			THSD7A	Acute lymphocytic leukaemia	Inverse variance weighted	4.88405725201605	4	0.299402154317106
C19orf18	Acute Lymphoblastic Leukemia	MR Egger	0.0616450859973444	1	0.803914457437725			KRT5	Acute lymphocytic leukaemia	MR Egger	2.00020302469212	8	0.981005618441161
C19orf18	Acute Lymphoblastic Leukemia	Inverse variance weighted	1.72344920449609	2	0.422432924973219			KRT5	Acute lymphocytic leukaemia	Inverse variance weighted	2.09520673162668	9	0.989870917547127
C19orf35	Acute Lymphoblastic Leukemia	MR Egger	23.189849726361	29	0.767783837262248			SVEP1	Acute lymphocytic leukaemia	MR Egger	13.4389332247615	14	0.492289705590743
C19orf35	Acute Lymphoblastic Leukemia	Inverse variance weighted	23.2382539951998	30	0.805339873961185			SVEP1	Acute lymphocytic leukaemia	Inverse variance weighted	13.4631120412109	15	0.566573978867389
C19orf54	Acute Lymphoblastic Leukemia	MR Egger	22.8584777712373	29	0.782979723939363			SMARCC1	Acute lymphocytic leukaemia	MR Egger	8.49595140042146	6	0.203972008397184
C19orf54	Acute Lymphoblastic Leukemia	Inverse variance weighted	24.0112723301811	30	0.771514282568978			SMARCC1	Acute lymphocytic leukaemia	Inverse variance weighted	8.91021581254781	7	0.259166650986294
C19orf66	Acute Lymphoblastic Leukemia	MR Egger	10.0804119981736	14	0.756281109044277			CLEC12A	Acute lymphocytic leukaemia	MR Egger	7.57528822870221	16	0.960516855263579
C19orf66	Acute Lymphoblastic Leukemia	Inverse variance weighted	12.413298539246	15	0.647514490065993			CLEC12A	Acute lymphocytic leukaemia	Inverse variance weighted	7.67823102345015	17	0.972951646890239
C1orf109	Acute Lymphoblastic Leukemia	MR Egger	6.54229553753519	13	0.924175362013632			TINAGL1	Acute lymphocytic leukaemia	MR Egger	9.24705060188776	13	0.754039413180738
C1orf109	Acute Lymphoblastic Leukemia	Inverse variance weighted	6.94430597224109	14	0.936837515953314			TINAGL1	Acute lymphocytic leukaemia	Inverse variance weighted	9.26902686221306	14	0.813440173296159
C1orf131	Acute Lymphoblastic Leukemia	MR Egger	7.39141558622931	9	0.596437509586614			CREB3L1	Acute lymphocytic leukaemia	MR Egger	0.0416779909023522	1	0.838234812037444
C1orf131	Acute Lymphoblastic Leukemia	Inverse variance weighted	7.57758907964584	10	0.670020825119459			CREB3L1	Acute lymphocytic leukaemia	Inverse variance weighted	1.6386682556664	2	0.440725023348346
C1orf145	Acute Lymphoblastic Leukemia	MR Egger	3.4767274848784	6	0.747063385058629			TBX5	Acute lymphocytic leukaemia	MR Egger	1.26582602768215	1	0.260551177171938
C1orf145	Acute Lymphoblastic Leukemia	Inverse variance weighted	5.8665511276887	7	0.555415226997399			TBX5	Acute lymphocytic leukaemia	Inverse variance weighted	3.12559659924762	2	0.209548869478127
C1QL3	Acute Lymphoblastic Leukemia	MR Egger	4.71714923422077	9	0.858235291277109			MSR1	Acute lymphocytic leukaemia	MR Egger	0.832180656713058	2	0.659620685340876
C1QL3	Acute Lymphoblastic Leukemia	Inverse variance weighted	5.24646190758111	10	0.874117666035744			MSR1	Acute lymphocytic leukaemia	Inverse variance weighted	3.14091610404509	3	0.370404825226003
C1QTNF4	Acute Lymphoblastic Leukemia	MR Egger	15.9001433634323	28	0.967275044244981			NAGPA	Acute lymphocytic leukaemia	MR Egger	6.16833260307838	10	0.80092788120515
C1QTNF4	Acute Lymphoblastic Leukemia	Inverse variance weighted	16.1327236175847	29	0.97400244831912			NAGPA	Acute lymphocytic leukaemia	Inverse variance weighted	6.29404306797802	11	0.853042101060041
C1R	Acute Lymphoblastic Leukemia	MR Egger	1.20919970985146	2	0.546292979355194			TBCE	Acute lymphocytic leukaemia	MR Egger	3.38104048665438	4	0.496195305135705
C1R	Acute Lymphoblastic Leukemia	Inverse variance weighted	1.57865905147958	3	0.664238358678016			TBCE	Acute lymphocytic leukaemia	Inverse variance weighted	3.52599647379428	5	0.6194577335675
C20orf196	Acute Lymphoblastic Leukemia	MR Egger	10.3342203612724	22	0.983012940361959			TXNDC5	Acute lymphocytic leukaemia	MR Egger	6.04564630302797	6	0.418096239911964
C20orf196	Acute Lymphoblastic Leukemia	Inverse variance weighted	10.6746427013084	23	0.986268874318734			TXNDC5	Acute lymphocytic leukaemia	Inverse variance weighted	7.23658996325143	7	0.404669043033523
C20orf197	Acute Lymphoblastic Leukemia	MR Egger	10.5341654228661	17	0.879731184050179			DNAJB9	Acute lymphocytic leukaemia	MR Egger	9.90759915499431	10	0.448637053677892
C20orf197	Acute Lymphoblastic Leukemia	Inverse variance weighted	10.5826519271706	18	0.911220919634329			DNAJB9	Acute lymphocytic leukaemia	Inverse variance weighted	11.2566908367074	11	0.422015947510336
C20orf27	Acute Lymphoblastic Leukemia	MR Egger	24.8735347161238	33	0.844398853104134			CDH15	Acute lymphocytic leukaemia	MR Egger	11.5302502703631	11	0.399966921803315
C20orf27	Acute Lymphoblastic Leukemia	Inverse variance weighted	26.135129172271	34	0.830598474511636			CDH15	Acute lymphocytic leukaemia	Inverse variance weighted	12.3567904025322	12	0.417467366876701
C22orf29	Acute Lymphoblastic Leukemia	MR Egger	18.0487170091086	24	0.800638742994956			TPMT	Acute lymphocytic leukaemia	MR Egger	16.8324493100821	9	0.0514053733956828
C22orf29	Acute Lymphoblastic Leukemia	Inverse variance weighted	18.4341189668474	25	0.823416376993286			TPMT	Acute lymphocytic leukaemia	Inverse variance weighted	19.4357166040633	10	0.0350649574293172
C3	Acute Lymphoblastic Leukemia	MR Egger	0.541364818188245	1	0.461867651338297			FGFBP3	Acute lymphocytic leukaemia	MR Egger	2.64835761146443	8	0.954453567325322
C3	Acute Lymphoblastic Leukemia	Inverse variance weighted	0.764131183544864	2	0.682450288613285			FGFBP3	Acute lymphocytic leukaemia	Inverse variance weighted	3.08974262028801	9	0.960630328078921
C4BPA	Acute Lymphoblastic Leukemia	MR Egger	19.5589921852716	34	0.977434380900563			TMEM154	Acute lymphocytic leukaemia	MR Egger	3.73548960602356	7	0.809689826249349
C4BPA	Acute Lymphoblastic Leukemia	Inverse variance weighted	20.7550248483653	35	0.973086978707222			TMEM154	Acute lymphocytic leukaemia	Inverse variance weighted	8.79880279498271	8	0.359552122426754
C4BPB	Acute Lymphoblastic Leukemia	MR Egger	25.1298296888754	18	0.121381579747226			UBE3A	Acute lymphocytic leukaemia	MR Egger	0.0543285589704112	1	0.815695499453204
C4BPB	Acute Lymphoblastic Leukemia	Inverse variance weighted	25.2472696026882	19	0.152563012746403			UBE3A	Acute lymphocytic leukaemia	Inverse variance weighted	3.56999047980417	2	0.167797859732527
C5orf22	Acute Lymphoblastic Leukemia	MR Egger	3.35210931035117	8	0.910359538812499			RIC3	Acute lymphocytic leukaemia	MR Egger	3.34896625933747	3	0.340885393570301
C5orf22	Acute Lymphoblastic Leukemia	Inverse variance weighted	3.36334459094667	9	0.948133661533783			RIC3	Acute lymphocytic leukaemia	Inverse variance weighted	7.43723216632158	4	0.114509151974265
C6orf163	Acute Lymphoblastic Leukemia	MR Egger	4.28494022393848	7	0.746435015066608			PCOLCE	Acute lymphocytic leukaemia	MR Egger	10.9120659397151	6	0.0911324579308563
C6orf163	Acute Lymphoblastic Leukemia	Inverse variance weighted	4.74786343398716	8	0.784153513770152			PCOLCE	Acute lymphocytic leukaemia	Inverse variance weighted	11.4808721664763	7	0.118975643902894
C6orf3	Acute Lymphoblastic Leukemia	MR Egger	32.4381686546336	22	0.0702265560905993			TMPRSS6	Acute lymphocytic leukaemia	MR Egger	14.4871869333597	15	0.488946189783551
C6orf3	Acute Lymphoblastic Leukemia	Inverse variance weighted	38.4604787826771	23	0.0227195566533968			TMPRSS6	Acute lymphocytic leukaemia	Inverse variance weighted	14.9515732469133	16	0.528188215684441
C7orf25	Acute Lymphoblastic Leukemia	MR Egger	25.4302951210634	32	0.788235517166004			ASL	Acute lymphocytic leukaemia	MR Egger	1.44414422719198	6	0.963118152936528
C7orf25	Acute Lymphoblastic Leukemia	Inverse variance weighted	25.4452928482939	33	0.823383059789924			ASL	Acute lymphocytic leukaemia	Inverse variance weighted	2.17280568022071	7	0.949659876430228
C7orf29	Acute Lymphoblastic Leukemia	MR Egger	18.2548500260373	19	0.505479512706877			TGM1	Acute lymphocytic leukaemia	MR Egger	0.698782297033921	1	0.403193162817342
C7orf29	Acute Lymphoblastic Leukemia	Inverse variance weighted	18.3066707806864	20	0.567214160637277			TGM1	Acute lymphocytic leukaemia	Inverse variance weighted	0.713442082330462	2	0.699967732685174
C7orf34	Acute Lymphoblastic Leukemia	MR Egger	8.24246779010338	18	0.974804283802328			ADGRF1	Acute lymphocytic leukaemia	MR Egger	3.17113962351695	4	0.529604965738644
C7orf34	Acute Lymphoblastic Leukemia	Inverse variance weighted	8.71860978845724	19	0.977866536689216			ADGRF1	Acute lymphocytic leukaemia	Inverse variance weighted	5.24115851076043	5	0.387163437735517
C7orf41	Acute Lymphoblastic Leukemia	MR Egger	2.67652506709131	4	0.613328629112015			NAGS	Acute lymphocytic leukaemia	MR Egger	0.106250275561879	1	0.744454208260653
C7orf41	Acute Lymphoblastic Leukemia	Inverse variance weighted	2.74962002822116	5	0.738519440108371			NAGS	Acute lymphocytic leukaemia	Inverse variance weighted	2.76739901477811	2	0.25064955581941
C7orf49	Acute Lymphoblastic Leukemia	MR Egger	5.51255077514262	10	0.854421161550625			UROS	Acute lymphocytic leukaemia	MR Egger	3.2118325241698	4	0.523021913259893
C7orf49	Acute Lymphoblastic Leukemia	Inverse variance weighted	5.58844255048574	11	0.899366523508239			UROS	Acute lymphocytic leukaemia	Inverse variance weighted	4.86334196873244	5	0.432784926481419
C7orf53	Acute Lymphoblastic Leukemia	MR Egger	30.4183249928325	33	0.596286783315051			PAPLN	Acute lymphocytic leukaemia	MR Egger	0.0162843223703227	2	0.991890896428239
C7orf53	Acute Lymphoblastic Leukemia	Inverse variance weighted	30.9655806354426	34	0.617133711382027			PAPLN	Acute lymphocytic leukaemia	Inverse variance weighted	2.90403682835886	3	0.406658679280503
C8orf46	Acute Lymphoblastic Leukemia	MR Egger	18.8476392631322	27	0.875486554464543			QDPR	Acute lymphocytic leukaemia	MR Egger	1.31532045124356	3	0.725498338477773
C8orf46	Acute Lymphoblastic Leukemia	Inverse variance weighted	18.8631904186215	28	0.902303720643516			QDPR	Acute lymphocytic leukaemia	Inverse variance weighted	2.39449992463272	4	0.66362144767412
C9orf84	Acute Lymphoblastic Leukemia	MR Egger	7.62229957860507	8	0.471206413272165			MADCAM1	Acute lymphocytic leukaemia	MR Egger	1.57040764204811	1	0.210147824083231
C9orf84	Acute Lymphoblastic Leukemia	Inverse variance weighted	7.65180541450967	9	0.569580273223399			MADCAM1	Acute lymphocytic leukaemia	Inverse variance weighted	1.6044034858395	2	0.448340745552666
C9orf91	Acute Lymphoblastic Leukemia	MR Egger	20.6744989981387	24	0.657844994105629			SUN5	Acute lymphocytic leukaemia	MR Egger	2.13369216980322	4	0.711185295928795
C9orf91	Acute Lymphoblastic Leukemia	Inverse variance weighted	25.3043519549283	25	0.445424691111812			SUN5	Acute lymphocytic leukaemia	Inverse variance weighted	6.4158238249028	5	0.26783295340382
CA2	Acute Lymphoblastic Leukemia	MR Egger	30.9128337074268	36	0.70908735619092			TRABD	Acute lymphocytic leukaemia	MR Egger	6.17336153518339	3	0.103473779089256
CA2	Acute Lymphoblastic Leukemia	Inverse variance weighted	31.4157667353051	37	0.72788016908475			TRABD	Acute lymphocytic leukaemia	Inverse variance weighted	6.31418907259189	4	0.176880991878635
CACNA2D3	Acute Lymphoblastic Leukemia	MR Egger	6.20188312996226	14	0.961143486708991			CASQ1	Acute lymphocytic leukaemia	MR Egger	6.19551259007316	4	0.185015307102402
CACNA2D3	Acute Lymphoblastic Leukemia	Inverse variance weighted	9.22662658527311	15	0.865372725674149			CASQ1	Acute lymphocytic leukaemia	Inverse variance weighted	6.70935622159881	5	0.243168586634686
CACUL1	Acute Lymphoblastic Leukemia	MR Egger	16.1891585241864	13	0.239066133772554			XDH	Acute lymphocytic leukaemia	MR Egger	1.22280726323418	1	0.268810428260361
CACUL1	Acute Lymphoblastic Leukemia	Inverse variance weighted	17.6141812126449	14	0.224921736707941			XDH	Acute lymphocytic leukaemia	Inverse variance weighted	1.29100439316427	2	0.524399124520414
CAMK2D	Acute Lymphoblastic Leukemia	MR Egger	21.1533968549152	23	0.571720187794702			SELPLG	Acute lymphocytic leukaemia	MR Egger	27.632772940245	21	0.150876886867949
CAMK2D	Acute Lymphoblastic Leukemia	Inverse variance weighted	23.9812505757109	24	0.462669917060438			SELPLG	Acute lymphocytic leukaemia	Inverse variance weighted	28.2301506093587	22	0.168178670454584
CANX	Acute Lymphoblastic Leukemia	MR Egger	7.58511935643993	9	0.576434502891225			CHCHD10	Acute lymphocytic leukaemia	MR Egger	0.000700854405694414	1	0.978879546547469
CANX	Acute Lymphoblastic Leukemia	Inverse variance weighted	7.96170339971961	10	0.632577820299109			CHCHD10	Acute lymphocytic leukaemia	Inverse variance weighted	1.41576691965558	2	0.492685884152315
CAPN10	Acute Lymphoblastic Leukemia	MR Egger	0.368396350276581	3	0.946690832199308			GSTT2B	Acute lymphocytic leukaemia	MR Egger	3.4301248855444	3	0.329938405530919
CAPN10	Acute Lymphoblastic Leukemia	Inverse variance weighted	1.36119825081723	4	0.850910119665483			GSTT2B	Acute lymphocytic leukaemia	Inverse variance weighted	3.88484951670226	4	0.42181402160652
CAPN12	Acute Lymphoblastic Leukemia	MR Egger	50.8940856753402	56	0.668008885614745			LRP1B	Acute lymphocytic leukaemia	MR Egger	0.126272284093204	1	0.722328812491808
CAPN12	Acute Lymphoblastic Leukemia	Inverse variance weighted	52.0161121074116	57	0.662088877973605			LRP1B	Acute lymphocytic leukaemia	Inverse variance weighted	1.31065764249406	2	0.519271287079114
CAPRIN2	Acute Lymphoblastic Leukemia	MR Egger	10.9122933442115	13	0.618165005670014			ATF6	Acute lymphocytic leukaemia	MR Egger	17.5637881554877	21	0.676416714038049
CAPRIN2	Acute Lymphoblastic Leukemia	Inverse variance weighted	10.9188796206586	14	0.692396606053456			ATF6	Acute lymphocytic leukaemia	Inverse variance weighted	17.5879013018371	22	0.730122889191866
CARD8	Acute Lymphoblastic Leukemia	MR Egger	61.3631726238819	66	0.638716002365047			COL11A2	Acute lymphocytic leukaemia	MR Egger	18.9954380344255	10	0.040320664499559
CARD8	Acute Lymphoblastic Leukemia	Inverse variance weighted	61.9711744155702	67	0.650916415317524			COL11A2	Acute lymphocytic leukaemia	Inverse variance weighted	18.9960533478573	11	0.0611643897388403
CARM1	Acute Lymphoblastic Leukemia	MR Egger	2.8421849767966	8	0.943867372179959			GAD1	Acute lymphocytic leukaemia	MR Egger	0.00982969706488357	2	0.995097209572931
CARM1	Acute Lymphoblastic Leukemia	Inverse variance weighted	2.90134413380397	9	0.968078081337642			GAD1	Acute lymphocytic leukaemia	Inverse variance weighted	0.0707572118872842	3	0.995099112980668
CASP16	Acute Lymphoblastic Leukemia	MR Egger	0.000117197058393077	1	0.991362462733707			GRB7	Acute lymphocytic leukaemia	MR Egger	10.241093757468	6	0.114859358119346
CASP16	Acute Lymphoblastic Leukemia	Inverse variance weighted	0.000849498527009715	2	0.999575340929693			GRB7	Acute lymphocytic leukaemia	Inverse variance weighted	12.0425551845691	7	0.0991680744843409
CASP4	Acute Lymphoblastic Leukemia	MR Egger	5.16347010722617	5	0.396257763989941			DCAF5	Acute lymphocytic leukaemia	MR Egger	5.89222004715066	3	0.116973332912566
CASP4	Acute Lymphoblastic Leukemia	Inverse variance weighted	7.88053524062948	6	0.246986938584188			DCAF5	Acute lymphocytic leukaemia	Inverse variance weighted	5.89788436632494	4	0.206905224784403
CASP6	Acute Lymphoblastic Leukemia	MR Egger	0.413546501304728	3	0.937430105495594			CYB5A	Acute lymphocytic leukaemia	MR Egger	0.0709207025957568	1	0.790000925500081
CASP6	Acute Lymphoblastic Leukemia	Inverse variance weighted	0.414061187817408	4	0.981309568429346			CYB5A	Acute lymphocytic leukaemia	Inverse variance weighted	0.220402168564072	2	0.895654015242872
CASP7	Acute Lymphoblastic Leukemia	MR Egger	42.5496353129115	56	0.907490999055681			NT5C2	Acute lymphocytic leukaemia	MR Egger	2.20712912907206	2	0.331686655477599
CASP7	Acute Lymphoblastic Leukemia	Inverse variance weighted	47.3954611190182	57	0.813882025674908			NT5C2	Acute lymphocytic leukaemia	Inverse variance weighted	2.22540788104054	3	0.526961165337696
CASP8	Acute Lymphoblastic Leukemia	MR Egger	7.72953521600329	17	0.971993009963406			SCARA3	Acute lymphocytic leukaemia	MR Egger	0.819237882196003	4	0.935850509087138
CASP8	Acute Lymphoblastic Leukemia	Inverse variance weighted	7.81131806945856	18	0.981314739408513			SCARA3	Acute lymphocytic leukaemia	Inverse variance weighted	4.78204247809282	5	0.443054991728218
CAST	Acute Lymphoblastic Leukemia	MR Egger	41.8165830722448	49	0.756850567517311			LRRN1	Acute lymphocytic leukaemia	MR Egger	13.3652318904283	7	0.0636940415912149
CAST	Acute Lymphoblastic Leukemia	Inverse variance weighted	42.3371613918107	50	0.770875021231557			LRRN1	Acute lymphocytic leukaemia	Inverse variance weighted	13.4265736707297	8	0.0979911414100584
CAV1	Acute Lymphoblastic Leukemia	MR Egger	1.03914126365345	1	0.308021275382536			TNR	Acute lymphocytic leukaemia	MR Egger	20.7224139597525	9	0.0139416273343393
CAV1	Acute Lymphoblastic Leukemia	Inverse variance weighted	1.36094844784017	2	0.506376799426609			TNR	Acute lymphocytic leukaemia	Inverse variance weighted	24.8597202780826	10	0.00561783923347366
CAV2	Acute Lymphoblastic Leukemia	MR Egger	22.6650590782539	30	0.828774907410256			WWP1	Acute lymphocytic leukaemia	MR Egger	2.5449175631333	3	0.467228136754639
CAV2	Acute Lymphoblastic Leukemia	Inverse variance weighted	22.7920811163234	31	0.856580338906304			WWP1	Acute lymphocytic leukaemia	Inverse variance weighted	2.66140719475929	4	0.615984546716528
CBLN3	Acute Lymphoblastic Leukemia	MR Egger	45.8075455990796	61	0.926195888064758			CREB3L4	Acute lymphocytic leukaemia	MR Egger	13.2251098872713	12	0.352893340327625
CBLN3	Acute Lymphoblastic Leukemia	Inverse variance weighted	45.9141784063444	62	0.93715551400587			CREB3L4	Acute lymphocytic leukaemia	Inverse variance weighted	13.4555076045259	13	0.413273998128777
CBWD1	Acute Lymphoblastic Leukemia	MR Egger	14.3726218645313	13	0.348135239257961			RAG1	Acute lymphocytic leukaemia	MR Egger	1.65110681339243	1	0.198808354806496
CBWD1	Acute Lymphoblastic Leukemia	Inverse variance weighted	15.5976030367502	14	0.338560488094241			RAG1	Acute lymphocytic leukaemia	Inverse variance weighted	2.75735187658081	2	0.251911879212319
CCDC102A	Acute Lymphoblastic Leukemia	MR Egger	8.22770111446652	10	0.606606153520231			PMS2	Acute lymphocytic leukaemia	MR Egger	0.120002655469665	1	0.729031609486151
CCDC102A	Acute Lymphoblastic Leukemia	Inverse variance weighted	11.3392265194228	11	0.415297076585381			PMS2	Acute lymphocytic leukaemia	Inverse variance weighted	2.53284137512567	2	0.281838606977203
CCDC114	Acute Lymphoblastic Leukemia	MR Egger	7.60636814241045	7	0.368579113290507			PCBD1	Acute lymphocytic leukaemia	MR Egger	10.7028778283004	8	0.219109444695427
CCDC114	Acute Lymphoblastic Leukemia	Inverse variance weighted	9.33057333833949	8	0.315181159092921			PCBD1	Acute lymphocytic leukaemia	Inverse variance weighted	12.4856424780931	9	0.187294308762725
CCDC132	Acute Lymphoblastic Leukemia	MR Egger	2.99319729673205	2	0.223890396465817			PPM1D	Acute lymphocytic leukaemia	MR Egger	2.59293152072078	3	0.458730090377583
CCDC132	Acute Lymphoblastic Leukemia	Inverse variance weighted	3.33804453264102	3	0.342382558279142			PPM1D	Acute lymphocytic leukaemia	Inverse variance weighted	3.17202995537632	4	0.529460399340106
CCDC136	Acute Lymphoblastic Leukemia	MR Egger	11.8881465869113	10	0.292612207550446			CHFR	Acute lymphocytic leukaemia	MR Egger	0.532770279396834	3	0.911635144128623
CCDC136	Acute Lymphoblastic Leukemia	Inverse variance weighted	11.9137324333148	11	0.370162525242277			CHFR	Acute lymphocytic leukaemia	Inverse variance weighted	2.00147517461785	4	0.735487539160457
CCDC144B	Acute Lymphoblastic Leukemia	MR Egger	3.09659400724228	4	0.541792761631516			BTG2	Acute lymphocytic leukaemia	MR Egger	10.6761368142993	5	0.0581930943956906
CCDC144B	Acute Lymphoblastic Leukemia	Inverse variance weighted	3.75052824763072	5	0.585862890880232			BTG2	Acute lymphocytic leukaemia	Inverse variance weighted	11.1945719936671	6	0.0825459056460918
CCDC152	Acute Lymphoblastic Leukemia	MR Egger	11.1929907592487	21	0.958895374861356			CLK2	Acute lymphocytic leukaemia	MR Egger	13.8913219140138	8	0.0846424191713113
CCDC152	Acute Lymphoblastic Leukemia	Inverse variance weighted	13.2385350851855	22	0.926294425517182			CLK2	Acute lymphocytic leukaemia	Inverse variance weighted	14.5894564498883	9	0.102847927161877
CCDC174	Acute Lymphoblastic Leukemia	MR Egger	5.51588324436825	8	0.701279635644738			CSNK2B	Acute lymphocytic leukaemia	MR Egger	2.40375854793829	1	0.121044116131973
CCDC174	Acute Lymphoblastic Leukemia	Inverse variance weighted	6.85729497810603	9	0.651974183311128			CSNK2B	Acute lymphocytic leukaemia	Inverse variance weighted	2.40664288921461	2	0.300195471569831
CCDC176	Acute Lymphoblastic Leukemia	MR Egger	1.51951771720488	5	0.910806544454189			ARHGAP25	Acute lymphocytic leukaemia	MR Egger	0.325958443663177	2	0.849608841546783
CCDC176	Acute Lymphoblastic Leukemia	Inverse variance weighted	4.84975850372754	6	0.563222290475896			ARHGAP25	Acute lymphocytic leukaemia	Inverse variance weighted	0.924675379929479	3	0.819469356058012
CCDC24	Acute Lymphoblastic Leukemia	MR Egger	41.5676224746987	40	0.402295122589263			TALDO1	Acute lymphocytic leukaemia	MR Egger	1.11968204511123	4	0.891136989667561
CCDC24	Acute Lymphoblastic Leukemia	Inverse variance weighted	41.5677450997549	41	0.445898305382769			TALDO1	Acute lymphocytic leukaemia	Inverse variance weighted	2.28874440628572	5	0.807918587633082
CCDC57	Acute Lymphoblastic Leukemia	MR Egger	9.17560686858096	23	0.995329746572408			P4HA2	Acute lymphocytic leukaemia	MR Egger	0.47482336683219	1	0.490776522989227
CCDC57	Acute Lymphoblastic Leukemia	Inverse variance weighted	9.28190675486367	24	0.996930312664624			P4HA2	Acute lymphocytic leukaemia	Inverse variance weighted	1.85356240330414	2	0.395825745316445
CCDC81	Acute Lymphoblastic Leukemia	MR Egger	0.308909568612411	1	0.578350089640346			NHEJ1	Acute lymphocytic leukaemia	MR Egger	1.04517640720412	2	0.592983797316095
CCDC81	Acute Lymphoblastic Leukemia	Inverse variance weighted	1.36456224485746	2	0.505462654075562			NHEJ1	Acute lymphocytic leukaemia	Inverse variance weighted	1.3136604707392	3	0.725891846673671
CCDC92	Acute Lymphoblastic Leukemia	MR Egger	16.9631945674369	19	0.59236140504685			PLCB1	Acute lymphocytic leukaemia	MR Egger	0.0856289217423132	1	0.769809415037118
CCDC92	Acute Lymphoblastic Leukemia	Inverse variance weighted	17.4444279859522	20	0.623955064059295			PLCB1	Acute lymphocytic leukaemia	Inverse variance weighted	1.27100297001649	2	0.529669800239704
CCHCR1	Acute Lymphoblastic Leukemia	MR Egger	17.1683598538966	16	0.374784347456217			GRB10	Acute lymphocytic leukaemia	MR Egger	0.609690328060212	3	0.894210455212341
CCHCR1	Acute Lymphoblastic Leukemia	Inverse variance weighted	18.074761417726	17	0.384139118546208			GRB10	Acute lymphocytic leukaemia	Inverse variance weighted	1.48414528115428	4	0.829446172059971
CCL3L3	Acute Lymphoblastic Leukemia	MR Egger	6.11651989616225	11	0.86547758008207			RRM1	Acute lymphocytic leukaemia	MR Egger	25.9275574496501	26	0.467092398127543
CCL3L3	Acute Lymphoblastic Leukemia	Inverse variance weighted	6.76709572998255	12	0.872613206228388			RRM1	Acute lymphocytic leukaemia	Inverse variance weighted	27.1672024828876	27	0.454801972834641
CCL4L1	Acute Lymphoblastic Leukemia	MR Egger	9.22895055658458	15	0.865245164420046			ADH5	Acute lymphocytic leukaemia	MR Egger	3.83425129130201	5	0.573518079785072
CCL4L1	Acute Lymphoblastic Leukemia	Inverse variance weighted	12.1312537794591	16	0.734896119086581			ADH5	Acute lymphocytic leukaemia	Inverse variance weighted	3.83816084009953	6	0.698566771607749
CCL5	Acute Lymphoblastic Leukemia	MR Egger	2.90534959183914	3	0.406449797494444			INPP5E	Acute lymphocytic leukaemia	MR Egger	5.6010273643508	3	0.132719390565398
CCL5	Acute Lymphoblastic Leukemia	Inverse variance weighted	4.54559027615095	4	0.337175829310127			INPP5E	Acute lymphocytic leukaemia	Inverse variance weighted	8.19012545806065	4	0.084856748961698
CCR5	Acute Lymphoblastic Leukemia	MR Egger	5.24485184768549	14	0.982104727437736			ZNF18	Acute lymphocytic leukaemia	MR Egger	3.93749436092179	3	0.268293193085707
CCR5	Acute Lymphoblastic Leukemia	Inverse variance weighted	5.52242277871706	15	0.986703011580312			ZNF18	Acute lymphocytic leukaemia	Inverse variance weighted	5.11071250844244	4	0.276125174901167
CCT5	Acute Lymphoblastic Leukemia	MR Egger	5.8166004706613	11	0.885316514866927			ADH7	Acute lymphocytic leukaemia	MR Egger	6.28448701645062	6	0.392087805626996
CCT5	Acute Lymphoblastic Leukemia	Inverse variance weighted	5.94626633790898	12	0.918766446863358			ADH7	Acute lymphocytic leukaemia	Inverse variance weighted	8.27811278634082	7	0.308710264807709
CCT6A	Acute Lymphoblastic Leukemia	MR Egger	7.57436110006504	16	0.960540148257355			SYK	Acute lymphocytic leukaemia	MR Egger	0.678414182997285	1	0.410133329879413
CCT6A	Acute Lymphoblastic Leukemia	Inverse variance weighted	8.97333698109892	17	0.94109456086039			SYK	Acute lymphocytic leukaemia	Inverse variance weighted	1.20071686162741	2	0.548614960342161
CCT6P1	Acute Lymphoblastic Leukemia	MR Egger	13.0653119000089	12	0.364311466561049			RBM24	Acute lymphocytic leukaemia	MR Egger	6.88862754103017	5	0.22905587079286
CCT6P1	Acute Lymphoblastic Leukemia	Inverse variance weighted	14.0527511763622	13	0.370139488721053			RBM24	Acute lymphocytic leukaemia	Inverse variance weighted	6.96977244758051	6	0.323651682936579
CD164	Acute Lymphoblastic Leukemia	MR Egger	11.8150732781464	12	0.460643427867573			KRT7	Acute lymphocytic leukaemia	MR Egger	4.91770323834654	7	0.670005708665769
CD164	Acute Lymphoblastic Leukemia	Inverse variance weighted	11.8628677449971	13	0.538919571496721			KRT7	Acute lymphocytic leukaemia	Inverse variance weighted	5.41760989176183	8	0.712150030020939
CD1A	Acute Lymphoblastic Leukemia	MR Egger	20.1315833760341	26	0.785280055206014			ATF6B	Acute lymphocytic leukaemia	MR Egger	13.1621387158325	10	0.214747248770788
CD1A	Acute Lymphoblastic Leukemia	Inverse variance weighted	20.7734766337602	27	0.796782292496116			ATF6B	Acute lymphocytic leukaemia	Inverse variance weighted	13.2013021394624	11	0.280372327728964
CD1E	Acute Lymphoblastic Leukemia	MR Egger	19.0415645606707	22	0.642760389423295			WFDC2	Acute lymphocytic leukaemia	MR Egger	3.33925460861031	2	0.188317237585256
CD1E	Acute Lymphoblastic Leukemia	Inverse variance weighted	20.1513724288502	23	0.632763823359363			WFDC2	Acute lymphocytic leukaemia	Inverse variance weighted	3.50588082251446	3	0.32000019844045
CD22	Acute Lymphoblastic Leukemia	MR Egger	1.21599964628025	4	0.875457420992585			CA8	Acute lymphocytic leukaemia	MR Egger	10.524920800375	5	0.06165687170641
CD22	Acute Lymphoblastic Leukemia	Inverse variance weighted	1.2190245097983	5	0.943039251524249			CA8	Acute lymphocytic leukaemia	Inverse variance weighted	10.7132347548349	6	0.097654001519944
CD226	Acute Lymphoblastic Leukemia	MR Egger	26.8556455634984	21	0.17568255440653			MVK	Acute lymphocytic leukaemia	MR Egger	3.48481508082618	4	0.480190998143116
CD226	Acute Lymphoblastic Leukemia	Inverse variance weighted	27.6039419443589	22	0.189180772008647			MVK	Acute lymphocytic leukaemia	Inverse variance weighted	4.77210173034808	5	0.444321542127726
CD247	Acute Lymphoblastic Leukemia	MR Egger	8.40582531812331	15	0.906484499229052			DNAI1	Acute lymphocytic leukaemia	MR Egger	5.10908692151495	3	0.16398133459061
CD247	Acute Lymphoblastic Leukemia	Inverse variance weighted	8.99233381277548	16	0.913728897074072			DNAI1	Acute lymphocytic leukaemia	Inverse variance weighted	5.16875085757282	4	0.270416696901328
CD27-AS1	Acute Lymphoblastic Leukemia	MR Egger	34.7351322427469	35	0.480818032048967			RNF146	Acute lymphocytic leukaemia	MR Egger	3.10405386062045	3	0.375858692794643
CD27-AS1	Acute Lymphoblastic Leukemia	Inverse variance weighted	37.2337449446067	36	0.412071795129472			RNF146	Acute lymphocytic leukaemia	Inverse variance weighted	3.23546575596865	4	0.519221736780886
CD300C	Acute Lymphoblastic Leukemia	MR Egger	52.7086459094475	54	0.524292799486178			CARD9	Acute lymphocytic leukaemia	MR Egger	2.07417048412213	1	0.149811368786132
CD300C	Acute Lymphoblastic Leukemia	Inverse variance weighted	52.9355147881422	55	0.553907524749434			CARD9	Acute lymphocytic leukaemia	Inverse variance weighted	3.48520237362345	2	0.175064432551879
CD300LB	Acute Lymphoblastic Leukemia	MR Egger	30.1201207631426	31	0.511099183371092			FBXL4	Acute lymphocytic leukaemia	MR Egger	16.9986395391111	8	0.0301232491745281
CD300LB	Acute Lymphoblastic Leukemia	Inverse variance weighted	30.2680729357459	32	0.554362161996538			FBXL4	Acute lymphocytic leukaemia	Inverse variance weighted	17.3276398447509	9	0.0438256553552238
CD300LD	Acute Lymphoblastic Leukemia	MR Egger	16.1592658397589	21	0.760636784794078			EHD4	Acute lymphocytic leukaemia	MR Egger	2.94844632499362	1	0.085960162002137
CD300LD	Acute Lymphoblastic Leukemia	Inverse variance weighted	16.5294698011737	22	0.788768211386603			EHD4	Acute lymphocytic leukaemia	Inverse variance weighted	3.38954969239896	2	0.183640571745966
CD300LF	Acute Lymphoblastic Leukemia	MR Egger	15.1408915642012	18	0.652271283050919			FAH	Acute lymphocytic leukaemia	MR Egger	5.4878718421313	6	0.482923768117071
CD300LF	Acute Lymphoblastic Leukemia	Inverse variance weighted	16.4895531229297	19	0.624406240290302			FAH	Acute lymphocytic leukaemia	Inverse variance weighted	6.54535377330816	7	0.477698449578625
CD38	Acute Lymphoblastic Leukemia	MR Egger	1.45468892703236	1	0.22777706218403			RUFY1	Acute lymphocytic leukaemia	MR Egger	3.94899000461437	5	0.556783324057787
CD38	Acute Lymphoblastic Leukemia	Inverse variance weighted	1.65700434320921	2	0.436702902704769			RUFY1	Acute lymphocytic leukaemia	Inverse variance weighted	4.34814379030256	6	0.629674082389309
CD44	Acute Lymphoblastic Leukemia	MR Egger	7.3721444631142	17	0.978198453567398			HNRNPC	Acute lymphocytic leukaemia	MR Egger	8.33366488845961	4	0.0800925351400291
CD44	Acute Lymphoblastic Leukemia	Inverse variance weighted	8.32597603725954	18	0.973378448378305			HNRNPC	Acute lymphocytic leukaemia	Inverse variance weighted	9.46169214938722	5	0.0920063952355083
CD47	Acute Lymphoblastic Leukemia	MR Egger	43.2668476058072	41	0.374774174232203			DTX1	Acute lymphocytic leukaemia	MR Egger	10.0633224228222	8	0.260609620322942
CD47	Acute Lymphoblastic Leukemia	Inverse variance weighted	44.3854673453696	42	0.371459802461903			DTX1	Acute lymphocytic leukaemia	Inverse variance weighted	12.9540571074905	9	0.164696173217868
CD55	Acute Lymphoblastic Leukemia	MR Egger	70.3586044775553	74	0.598441081323197			RECQL	Acute lymphocytic leukaemia	MR Egger	21.8697500281341	9	0.00930106956471835
CD55	Acute Lymphoblastic Leukemia	Inverse variance weighted	71.9814691080543	75	0.577380402644083			RECQL	Acute lymphocytic leukaemia	Inverse variance weighted	21.8734528139425	10	0.0157624186700217
CD6	Acute Lymphoblastic Leukemia	MR Egger	17.4250411682493	17	0.425948023571617			PQBP1	Acute lymphocytic leukaemia	MR Egger	5.21320440014418	1	0.0224159836947922
CD6	Acute Lymphoblastic Leukemia	Inverse variance weighted	17.6542744043573	18	0.47863691483913			PQBP1	Acute lymphocytic leukaemia	Inverse variance weighted	5.83629331319808	2	0.0540337376289734
CD69	Acute Lymphoblastic Leukemia	MR Egger	3.45605085339374	5	0.630047878683358			TCTN2	Acute lymphocytic leukaemia	MR Egger	0.00557581415939171	1	0.940476183963399
CD69	Acute Lymphoblastic Leukemia	Inverse variance weighted	5.99175620059199	6	0.424114193109903			TCTN2	Acute lymphocytic leukaemia	Inverse variance weighted	5.28500334712345	2	0.0711829700715479
CD86	Acute Lymphoblastic Leukemia	MR Egger	11.0253478313768	18	0.893277928232124			RHPN2	Acute lymphocytic leukaemia	MR Egger	6.57263065545708	5	0.254412788379508
CD86	Acute Lymphoblastic Leukemia	Inverse variance weighted	12.9278916271327	19	0.842241898671474			RHPN2	Acute lymphocytic leukaemia	Inverse variance weighted	8.61593731794645	6	0.196357220082829
CD93	Acute Lymphoblastic Leukemia	MR Egger	49.6135277579792	52	0.56828428740318			SOCS3	Acute lymphocytic leukaemia	MR Egger	2.99721016600495	7	0.88526019410141
CD93	Acute Lymphoblastic Leukemia	Inverse variance weighted	49.9620874147481	53	0.593197703575195			SOCS3	Acute lymphocytic leukaemia	Inverse variance weighted	3.13224999995278	8	0.925785886581999
CDADC1	Acute Lymphoblastic Leukemia	MR Egger	7.64028051261389	5	0.177206552876853			PYGL	Acute lymphocytic leukaemia	MR Egger	1.6081534675061	7	0.978327506222062
CDADC1	Acute Lymphoblastic Leukemia	Inverse variance weighted	7.8118666196397	6	0.252213050001622			PYGL	Acute lymphocytic leukaemia	Inverse variance weighted	2.11352513803543	8	0.977332232326459
CDC25B	Acute Lymphoblastic Leukemia	MR Egger	26.6780541223997	25	0.372157281439628			POLR3F	Acute lymphocytic leukaemia	MR Egger	0.906385137051456	1	0.341075371003628
CDC25B	Acute Lymphoblastic Leukemia	Inverse variance weighted	26.7635077245575	26	0.421814731501794			POLR3F	Acute lymphocytic leukaemia	Inverse variance weighted	0.962170813311781	2	0.618112124558991
CDC42	Acute Lymphoblastic Leukemia	MR Egger	27.8681868479367	39	0.907887292046391			GALK1	Acute lymphocytic leukaemia	MR Egger	4.57682638614872	1	0.0324071824876111
CDC42	Acute Lymphoblastic Leukemia	Inverse variance weighted	28.3126692047153	40	0.916929404264061			GALK1	Acute lymphocytic leukaemia	Inverse variance weighted	4.67835191274243	2	0.0964070491215787
CDC42EP1	Acute Lymphoblastic Leukemia	MR Egger	27.5594880004452	33	0.734712351537199			EIF3G	Acute lymphocytic leukaemia	MR Egger	1.55035896075458	3	0.670697215009867
CDC42EP1	Acute Lymphoblastic Leukemia	Inverse variance weighted	28.8032807879599	34	0.720214278404989			EIF3G	Acute lymphocytic leukaemia	Inverse variance weighted	1.63910388764754	4	0.801747420496322
CDC42SE1	Acute Lymphoblastic Leukemia	MR Egger	23.4140582548099	37	0.959814771614486			MAGEB10	Acute lymphocytic leukaemia	MR Egger	5.06716998535021	3	0.166944187506216
CDC42SE1	Acute Lymphoblastic Leukemia	Inverse variance weighted	25.1683456882615	38	0.945377882314453			MAGEB10	Acute lymphocytic leukaemia	Inverse variance weighted	5.06815670186512	4	0.280375414806721
CDHR1	Acute Lymphoblastic Leukemia	MR Egger	19.4920227537111	17	0.301031828320141			GALE	Acute lymphocytic leukaemia	MR Egger	8.14801621857833	5	0.148264618162153
CDHR1	Acute Lymphoblastic Leukemia	Inverse variance weighted	21.0594770095624	18	0.276422989377506			GALE	Acute lymphocytic leukaemia	Inverse variance weighted	8.15222899099346	6	0.227161469959567
CDHR3	Acute Lymphoblastic Leukemia	MR Egger	3.23957052584999	6	0.778233026629487			ELL	Acute lymphocytic leukaemia	MR Egger	7.41958240546306	3	0.0596611276382223
CDHR3	Acute Lymphoblastic Leukemia	Inverse variance weighted	3.73974425981779	7	0.809218244758385			ELL	Acute lymphocytic leukaemia	Inverse variance weighted	9.91032883068941	4	0.0419655765257792
CDK10	Acute Lymphoblastic Leukemia	MR Egger	35.3825868760471	51	0.952769501843969			RELB	Acute lymphocytic leukaemia	MR Egger	16.3839260294725	6	0.0118351041251581
CDK10	Acute Lymphoblastic Leukemia	Inverse variance weighted	37.1840816043476	52	0.939719193724526			RELB	Acute lymphocytic leukaemia	Inverse variance weighted	17.1343332159068	7	0.0165502112190686
CDK13	Acute Lymphoblastic Leukemia	MR Egger	16.4809325809093	14	0.284894516161059			GPR135	Acute lymphocytic leukaemia	MR Egger	6.6437581739519	3	0.0841622232537662
CDK13	Acute Lymphoblastic Leukemia	Inverse variance weighted	16.9838239956286	15	0.319832329436718			GPR135	Acute lymphocytic leukaemia	Inverse variance weighted	7.42113966604397	4	0.115237397922933
CDK19	Acute Lymphoblastic Leukemia	MR Egger	4.87665579844324	9	0.844925153272566			RBM19	Acute lymphocytic leukaemia	MR Egger	3.55758817663995	7	0.829088702145585
CDK19	Acute Lymphoblastic Leukemia	Inverse variance weighted	4.87750630585442	10	0.899208965271292			RBM19	Acute lymphocytic leukaemia	Inverse variance weighted	4.43033484759399	8	0.816361750535385
CDKN1A	Acute Lymphoblastic Leukemia	MR Egger	9.79817777360901	12	0.633661192684913			HAVCR2	Acute lymphocytic leukaemia	MR Egger	1.45649342114597	1	0.227488879237733
CDKN1A	Acute Lymphoblastic Leukemia	Inverse variance weighted	12.7611386850577	13	0.466426775485406			HAVCR2	Acute lymphocytic leukaemia	Inverse variance weighted	1.82378883877777	2	0.4017623961777
CEACAM19	Acute Lymphoblastic Leukemia	MR Egger	9.60629674123116	8	0.293752619877167			UBL4A	Acute lymphocytic leukaemia	MR Egger	0.168627963162516	1	0.681334069828016
CEACAM19	Acute Lymphoblastic Leukemia	Inverse variance weighted	13.1517169967916	9	0.155860545362364			UBL4A	Acute lymphocytic leukaemia	Inverse variance weighted	1.26470071552069	2	0.531341489649384
CEBPZ	Acute Lymphoblastic Leukemia	MR Egger	33.5306093386649	38	0.676141726368045			APOL1	Acute lymphocytic leukaemia	MR Egger	16.0968353725395	10	0.0968937280212515
CEBPZ	Acute Lymphoblastic Leukemia	Inverse variance weighted	33.539340380353	39	0.716771486342382			APOL1	Acute lymphocytic leukaemia	Inverse variance weighted	16.1138626530176	11	0.13695613550052
CECR1	Acute Lymphoblastic Leukemia	MR Egger	13.1394181203351	16	0.662537920495542			CD59	Acute lymphocytic leukaemia	MR Egger	6.98010597246464	5	0.222124061828155
CECR1	Acute Lymphoblastic Leukemia	Inverse variance weighted	13.2519800722845	17	0.719160883214347			CD59	Acute lymphocytic leukaemia	Inverse variance weighted	6.98546830430308	6	0.322193175241197
CELSR2	Acute Lymphoblastic Leukemia	MR Egger	16.2665074631491	17	0.505026689146435			FABP1	Acute lymphocytic leukaemia	MR Egger	0.598575004477894	1	0.439122243507057
CELSR2	Acute Lymphoblastic Leukemia	Inverse variance weighted	17.1273122562081	18	0.514368839723513			FABP1	Acute lymphocytic leukaemia	Inverse variance weighted	2.25883003963311	2	0.323222279757916
CENPB	Acute Lymphoblastic Leukemia	MR Egger	5.27852331271829	7	0.626014536374751			HMBS	Acute lymphocytic leukaemia	MR Egger	0.345861822590957	3	0.951184417146512
CENPB	Acute Lymphoblastic Leukemia	Inverse variance weighted	5.38099246401854	8	0.716186330458806			HMBS	Acute lymphocytic leukaemia	Inverse variance weighted	0.347835746384888	4	0.986520563406998
CENPN	Acute Lymphoblastic Leukemia	MR Egger	5.10919185787147	6	0.529886773857442			LRIT3	Acute lymphocytic leukaemia	MR Egger	1.85893002131971	2	0.394764848874153
CENPN	Acute Lymphoblastic Leukemia	Inverse variance weighted	13.7053081003005	7	0.0566779494540329			LRIT3	Acute lymphocytic leukaemia	Inverse variance weighted	2.14286191951126	3	0.543290289556643
CENPV	Acute Lymphoblastic Leukemia	MR Egger	16.9123265394975	33	0.990802437759982			MYSM1	Acute lymphocytic leukaemia	MR Egger	0.324955742274869	1	0.568644535835583
CENPV	Acute Lymphoblastic Leukemia	Inverse variance weighted	16.9649573471301	34	0.993512834711661			MYSM1	Acute lymphocytic leukaemia	Inverse variance weighted	1.45134129825626	2	0.483999865998508
CEP170B	Acute Lymphoblastic Leukemia	MR Egger	8.52910903296934	13	0.807505573002528			TFR2	Acute lymphocytic leukaemia	MR Egger	0.411400221143507	2	0.814077172818011
CEP170B	Acute Lymphoblastic Leukemia	Inverse variance weighted	8.56875017319069	14	0.857645579481585			TFR2	Acute lymphocytic leukaemia	Inverse variance weighted	2.67817843026616	3	0.443948388094168
CEP97	Acute Lymphoblastic Leukemia	MR Egger	1.90611233230399	7	0.964853463916414			FOXO3	Acute lymphocytic leukaemia	MR Egger	1.10003622308046	2	0.576939361025414
CEP97	Acute Lymphoblastic Leukemia	Inverse variance weighted	2.4279003445351	8	0.96500827205677			FOXO3	Acute lymphocytic leukaemia	Inverse variance weighted	1.19631970485024	3	0.753887133167867
CERK	Acute Lymphoblastic Leukemia	MR Egger	31.936223082168	27	0.234454509487429			TMEM230	Acute lymphocytic leukaemia	MR Egger	0.00322009765722831	1	0.954747606543327
CERK	Acute Lymphoblastic Leukemia	Inverse variance weighted	32.7620931303363	28	0.244615410716159			TMEM230	Acute lymphocytic leukaemia	Inverse variance weighted	2.29010049224964	2	0.318207928673425
CERS2	Acute Lymphoblastic Leukemia	MR Egger	9.89773566693319	11	0.539608756737523			LIMA1	Acute lymphocytic leukaemia	MR Egger	4.24240749518001	3	0.23645023861392
CERS2	Acute Lymphoblastic Leukemia	Inverse variance weighted	10.0586255701332	12	0.61081736441757			LIMA1	Acute lymphocytic leukaemia	Inverse variance weighted	5.14593802685485	4	0.272648432474726
CFD	Acute Lymphoblastic Leukemia	MR Egger	57.2777329225406	58	0.502125554346609			CYGB	Acute lymphocytic leukaemia	MR Egger	0.894859178225013	1	0.344163904797937
CFD	Acute Lymphoblastic Leukemia	Inverse variance weighted	57.3760211380716	59	0.535590620067479			CYGB	Acute lymphocytic leukaemia	Inverse variance weighted	1.18503466652132	2	0.552933613127269
CHAF1A	Acute Lymphoblastic Leukemia	MR Egger	6.02345607684849	11	0.871794614098711			MUSK	Acute lymphocytic leukaemia	MR Egger	4.3970986602236	6	0.623102763499682
CHAF1A	Acute Lymphoblastic Leukemia	Inverse variance weighted	6.90401196692735	12	0.863891077416941			MUSK	Acute lymphocytic leukaemia	Inverse variance weighted	4.40385126474017	7	0.732262123932249
CHD1L	Acute Lymphoblastic Leukemia	MR Egger	9.43865724035579	23	0.99424692012758			ISL1	Acute lymphocytic leukaemia	MR Egger	0.389795621853833	1	0.532406851118379
CHD1L	Acute Lymphoblastic Leukemia	Inverse variance weighted	10.3594806867173	24	0.992897604380934			ISL1	Acute lymphocytic leukaemia	Inverse variance weighted	1.95989258907799	2	0.375331255648245
CHI3L2	Acute Lymphoblastic Leukemia	MR Egger	38.6802913606628	52	0.91481831866727			ARFGAP1	Acute lymphocytic leukaemia	MR Egger	5.52044369818935	5	0.355709362603511
CHI3L2	Acute Lymphoblastic Leukemia	Inverse variance weighted	39.0259070313562	53	0.924039664991334			ARFGAP1	Acute lymphocytic leukaemia	Inverse variance weighted	5.90929783512562	6	0.433427017913818
CHRM3-AS2	Acute Lymphoblastic Leukemia	MR Egger	14.4003772931159	14	0.420328406054838			SMURF1	Acute lymphocytic leukaemia	MR Egger	0.761928705493668	1	0.382725612400667
CHRM3-AS2	Acute Lymphoblastic Leukemia	Inverse variance weighted	15.2511466498694	15	0.433482545173104			SMURF1	Acute lymphocytic leukaemia	Inverse variance weighted	2.67514533394242	2	0.262482027234857
CHSY1	Acute Lymphoblastic Leukemia	MR Egger	19.8975485548642	22	0.589448321175843			SYTL4	Acute lymphocytic leukaemia	MR Egger	6.74133147709901	4	0.150205578760596
CHSY1	Acute Lymphoblastic Leukemia	Inverse variance weighted	19.9295452965368	23	0.646158157646448			SYTL4	Acute lymphocytic leukaemia	Inverse variance weighted	8.91215116666537	5	0.112619874726056
CIB2	Acute Lymphoblastic Leukemia	MR Egger	5.39137325589326	7	0.612316561348873			ZNF10	Acute lymphocytic leukaemia	MR Egger	5.4277974836611	1	0.019818659763854
CIB2	Acute Lymphoblastic Leukemia	Inverse variance weighted	5.42534859739932	8	0.711295964626054			ZNF10	Acute lymphocytic leukaemia	Inverse variance weighted	5.49860595348835	2	0.0639724359456738
CIB3	Acute Lymphoblastic Leukemia	MR Egger	0.142558700920038	1	0.705750451784468			FKBP1B	Acute lymphocytic leukaemia	MR Egger	1.18211859107611	2	0.553740399212652
CIB3	Acute Lymphoblastic Leukemia	Inverse variance weighted	0.961853028711509	2	0.618210345619283			FKBP1B	Acute lymphocytic leukaemia	Inverse variance weighted	1.19900629679461	3	0.753242652596208
CIR1	Acute Lymphoblastic Leukemia	MR Egger	18.8449554520562	15	0.220845930879622			BCAP29	Acute lymphocytic leukaemia	MR Egger	9.09198680149472	4	0.0588409261360787
CIR1	Acute Lymphoblastic Leukemia	Inverse variance weighted	19.0114762589494	16	0.268068507137855			BCAP29	Acute lymphocytic leukaemia	Inverse variance weighted	9.15083040457744	5	0.103197176531837
CKM	Acute Lymphoblastic Leukemia	MR Egger	10.5212513168292	18	0.913558233301345			KLRC3	Acute lymphocytic leukaemia	MR Egger	5.47199146229192	4	0.242202444889642
CKM	Acute Lymphoblastic Leukemia	Inverse variance weighted	13.0217677813226	19	0.837454839381165			KLRC3	Acute lymphocytic leukaemia	Inverse variance weighted	6.42154446177499	5	0.267333376136787
CLDN5	Acute Lymphoblastic Leukemia	MR Egger	12.4621165052253	26	0.988253501269846			DNM2	Acute lymphocytic leukaemia	MR Egger	0.00393186682551926	1	0.950001734560517
CLDN5	Acute Lymphoblastic Leukemia	Inverse variance weighted	12.4920760854504	27	0.99212390954303			DNM2	Acute lymphocytic leukaemia	Inverse variance weighted	0.636693399435157	2	0.72735057245747
CLIC3	Acute Lymphoblastic Leukemia	MR Egger	12.5524637388839	14	0.562025317857835			SRSF6	Acute lymphocytic leukaemia	MR Egger	0.240760658524666	1	0.623657266148737
CLIC3	Acute Lymphoblastic Leukemia	Inverse variance weighted	13.1162841828399	15	0.593316559731182			SRSF6	Acute lymphocytic leukaemia	Inverse variance weighted	0.266077747279048	2	0.87543106025584
CLIC4	Acute Lymphoblastic Leukemia	MR Egger	11.2757008468945	17	0.84187796754562			MGA	Acute lymphocytic leukaemia	MR Egger	6.46361378167034	2	0.039486087242239
CLIC4	Acute Lymphoblastic Leukemia	Inverse variance weighted	11.7416930294423	18	0.860282538679047			MGA	Acute lymphocytic leukaemia	Inverse variance weighted	7.25105700090606	3	0.0643119696835765
CLIP2	Acute Lymphoblastic Leukemia	MR Egger	4.08289578985616	7	0.770181475701656			PRC1	Acute lymphocytic leukaemia	MR Egger	1.19278139750564	1	0.274769232591841
CLIP2	Acute Lymphoblastic Leukemia	Inverse variance weighted	4.28022687858732	8	0.830996788276391			PRC1	Acute lymphocytic leukaemia	Inverse variance weighted	1.60162427124055	2	0.448964196200799
CLMN	Acute Lymphoblastic Leukemia	MR Egger	21.1046577985841	23	0.574696168161583			ELAVL1	Acute lymphocytic leukaemia	MR Egger	0.483266246549761	2	0.78534424923145
CLMN	Acute Lymphoblastic Leukemia	Inverse variance weighted	25.5640749757111	24	0.37564766099217			ELAVL1	Acute lymphocytic leukaemia	Inverse variance weighted	3.6200403985439	3	0.305523748493078
CLN6	Acute Lymphoblastic Leukemia	MR Egger	39.829137256232	46	0.727153759825198			CXCL9	Acute lymphocytic leukaemia	MR Egger	0.0449143125780172	1	0.832161668219959
CLN6	Acute Lymphoblastic Leukemia	Inverse variance weighted	40.3138147163419	47	0.743979977389838			CXCL9	Acute lymphocytic leukaemia	Inverse variance weighted	1.56132653120662	2	0.458102067174561
CMAHP	Acute Lymphoblastic Leukemia	MR Egger	40.5772477642839	59	0.967888633326258			DHX8	Acute lymphocytic leukaemia	MR Egger	3.4327309146834	8	0.904347231974256
CMAHP	Acute Lymphoblastic Leukemia	Inverse variance weighted	40.8422277646177	60	0.972391812018509			DHX8	Acute lymphocytic leukaemia	Inverse variance weighted	3.49572241750886	9	0.941370706231628
CMC2	Acute Lymphoblastic Leukemia	MR Egger	27.4343772683469	18	0.0712008978563974			MAP1LC3B	Acute lymphocytic leukaemia	MR Egger	5.6900600418002	6	0.458789296800201
CMC2	Acute Lymphoblastic Leukemia	Inverse variance weighted	28.4614525870325	19	0.0749416363968365			MAP1LC3B	Acute lymphocytic leukaemia	Inverse variance weighted	6.16534124348367	7	0.520581601888815
CMPK1	Acute Lymphoblastic Leukemia	MR Egger	8.44896996538527	12	0.74913487657905			DAPP1	Acute lymphocytic leukaemia	MR Egger	0.151917666146503	1	0.696709462731429
CMPK1	Acute Lymphoblastic Leukemia	Inverse variance weighted	8.60143105730771	13	0.802335436214779			DAPP1	Acute lymphocytic leukaemia	Inverse variance weighted	0.151939686349322	2	0.926844156815288
CMTM3	Acute Lymphoblastic Leukemia	MR Egger	13.2727037584604	16	0.652723749433584			ITGAL	Acute lymphocytic leukaemia	MR Egger	0.0491988368047607	1	0.824463267350498
CMTM3	Acute Lymphoblastic Leukemia	Inverse variance weighted	13.6782187029406	17	0.689734220423748			ITGAL	Acute lymphocytic leukaemia	Inverse variance weighted	1.92952381631155	2	0.381073919531375
CMTM7	Acute Lymphoblastic Leukemia	MR Egger	28.7620143565261	30	0.53012283516137			AHSA1	Acute lymphocytic leukaemia	MR Egger	5.55200665965723	2	0.0622869509721162
CMTM7	Acute Lymphoblastic Leukemia	Inverse variance weighted	28.9470125764032	31	0.571993077541536			AHSA1	Acute lymphocytic leukaemia	Inverse variance weighted	5.58537610131199	3	0.133620426372328
CNIH	Acute Lymphoblastic Leukemia	MR Egger	0.0461249418637079	1	0.829948841892965			B3GALT2	Acute lymphocytic leukaemia	MR Egger	3.72722219842523	8	0.880857840611267
CNIH	Acute Lymphoblastic Leukemia	Inverse variance weighted	0.0932589579491697	2	0.954440972530692			B3GALT2	Acute lymphocytic leukaemia	Inverse variance weighted	5.96109714340385	9	0.743805463873032
CNR1	Acute Lymphoblastic Leukemia	MR Egger	12.4735903663079	22	0.946812416727933			DTX3L	Acute lymphocytic leukaemia	MR Egger	3.73875988782577	2	0.15421925676386
CNR1	Acute Lymphoblastic Leukemia	Inverse variance weighted	12.5535405497024	23	0.961016834571481			DTX3L	Acute lymphocytic leukaemia	Inverse variance weighted	3.9642030258435	3	0.265355591203082
CNTNAP1	Acute Lymphoblastic Leukemia	MR Egger	1.00609612634871	1	0.315839906247096			CHST9	Acute lymphocytic leukaemia	MR Egger	11.8189304784298	11	0.377406479963007
CNTNAP1	Acute Lymphoblastic Leukemia	Inverse variance weighted	1.00627239849528	2	0.604631438438825			CHST9	Acute lymphocytic leukaemia	Inverse variance weighted	12.1989850677945	12	0.429834192448228
CNTNAP3	Acute Lymphoblastic Leukemia	MR Egger	0.18992721550947	1	0.662977202310266			FZD10	Acute lymphocytic leukaemia	MR Egger	9.01255186349171	5	0.108564552478352
CNTNAP3	Acute Lymphoblastic Leukemia	Inverse variance weighted	1.16199779785061	2	0.559339363928807			FZD10	Acute lymphocytic leukaemia	Inverse variance weighted	9.86947296983785	6	0.130257512517675
CNTROB	Acute Lymphoblastic Leukemia	MR Egger	7.66090785576093	15	0.936656887926887			SMAP1	Acute lymphocytic leukaemia	MR Egger	9.15864701382674	8	0.329090067734163
CNTROB	Acute Lymphoblastic Leukemia	Inverse variance weighted	12.0009933553988	16	0.74391137653919			SMAP1	Acute lymphocytic leukaemia	Inverse variance weighted	9.34872350196707	9	0.405726356293782
COL19A1	Acute Lymphoblastic Leukemia	MR Egger	0.260862626173635	1	0.609528137584891			EVL	Acute lymphocytic leukaemia	MR Egger	7.00654848564271	5	0.220153744185601
COL19A1	Acute Lymphoblastic Leukemia	Inverse variance weighted	1.87460028159847	2	0.391683900485971			EVL	Acute lymphocytic leukaemia	Inverse variance weighted	7.26445686976089	6	0.297081374935449
COL5A3	Acute Lymphoblastic Leukemia	MR Egger	25.5477024195199	33	0.819473479560849			CLINT1	Acute lymphocytic leukaemia	MR Egger	5.67945532080087	2	0.0584415797538531
COL5A3	Acute Lymphoblastic Leukemia	Inverse variance weighted	25.825030269262	34	0.841718297084851			CLINT1	Acute lymphocytic leukaemia	Inverse variance weighted	5.72706303055124	3	0.12567117237253
COL6A1	Acute Lymphoblastic Leukemia	MR Egger	18.7975669385244	26	0.844861706761014			RGS8	Acute lymphocytic leukaemia	MR Egger	7.60605757478662	6	0.268407828001044
COL6A1	Acute Lymphoblastic Leukemia	Inverse variance weighted	19.0653217983952	27	0.86760883036774			RGS8	Acute lymphocytic leukaemia	Inverse variance weighted	7.64562515783495	7	0.364876459495867
COL6A4P2	Acute Lymphoblastic Leukemia	MR Egger	7.12912055099337	10	0.713201552680017			TNS2	Acute lymphocytic leukaemia	MR Egger	0.0530225672848523	1	0.817884848482449
COL6A4P2	Acute Lymphoblastic Leukemia	Inverse variance weighted	9.40067358234165	11	0.584960241532447			TNS2	Acute lymphocytic leukaemia	Inverse variance weighted	0.676670921564831	2	0.712956078973839
COL9A2	Acute Lymphoblastic Leukemia	MR Egger	3.13707804031535	9	0.958611185616083			KIF16B	Acute lymphocytic leukaemia	MR Egger	3.88300077868229	3	0.274378237662821
COL9A2	Acute Lymphoblastic Leukemia	Inverse variance weighted	3.32544816299765	10	0.972695491937885			KIF16B	Acute lymphocytic leukaemia	Inverse variance weighted	4.8395609794111	4	0.304159171242525
COMMD5	Acute Lymphoblastic Leukemia	MR Egger	4.9045337464395	12	0.961091731468456			GJD2	Acute lymphocytic leukaemia	MR Egger	9.64363097213822	3	0.0218514521292105
COMMD5	Acute Lymphoblastic Leukemia	Inverse variance weighted	6.8647486784896	13	0.908986313368046			GJD2	Acute lymphocytic leukaemia	Inverse variance weighted	9.97895795088444	4	0.0407836281272033
COQ6	Acute Lymphoblastic Leukemia	MR Egger	11.9852193277824	21	0.940015987942341			AGFG1	Acute lymphocytic leukaemia	MR Egger	2.98438245799854	3	0.394039367090463
COQ6	Acute Lymphoblastic Leukemia	Inverse variance weighted	12.8168366463863	22	0.938143830836272			AGFG1	Acute lymphocytic leukaemia	Inverse variance weighted	3.22288330907985	4	0.521242847577248
COX11	Acute Lymphoblastic Leukemia	MR Egger	6.30042746178198	22	0.999562557908668			TXNIP	Acute lymphocytic leukaemia	MR Egger	6.85716313881226	4	0.143631796309111
COX11	Acute Lymphoblastic Leukemia	Inverse variance weighted	8.44894954661189	23	0.997502878410887			TXNIP	Acute lymphocytic leukaemia	Inverse variance weighted	6.95344559110645	5	0.224125708525391
COX15	Acute Lymphoblastic Leukemia	MR Egger	4.94522148235382	7	0.666648147157616			GGA3	Acute lymphocytic leukaemia	MR Egger	0.386294802828829	1	0.534253469099567
COX15	Acute Lymphoblastic Leukemia	Inverse variance weighted	6.06405476489088	8	0.640056822838725			GGA3	Acute lymphocytic leukaemia	Inverse variance weighted	1.26600673279811	2	0.530994632329277
COX5BP6	Acute Lymphoblastic Leukemia	MR Egger	2.74735296909919	7	0.907349542810372			SHC4	Acute lymphocytic leukaemia	MR Egger	0.223684598588474	2	0.894185260028555
COX5BP6	Acute Lymphoblastic Leukemia	Inverse variance weighted	3.09926142708659	8	0.92797467041141			SHC4	Acute lymphocytic leukaemia	Inverse variance weighted	2.06857869088306	3	0.558295615964832
COX6B1	Acute Lymphoblastic Leukemia	MR Egger	29.5962449373491	26	0.284674444489391			CRABP2	Acute lymphocytic leukaemia	MR Egger	1.91213070159904	3	0.590843048032256
COX6B1	Acute Lymphoblastic Leukemia	Inverse variance weighted	29.6304025569843	27	0.331013723459654			CRABP2	Acute lymphocytic leukaemia	Inverse variance weighted	2.55015074571533	4	0.635678599495984
CPA3	Acute Lymphoblastic Leukemia	MR Egger	7.88228229699896	7	0.343088593255086			CPT1B	Acute lymphocytic leukaemia	MR Egger	20.0586475972677	18	0.329527548363398
CPA3	Acute Lymphoblastic Leukemia	Inverse variance weighted	8.72179078334517	8	0.366306228623611			CPT1B	Acute lymphocytic leukaemia	Inverse variance weighted	22.0604910042371	19	0.281256060977005
CPNE3	Acute Lymphoblastic Leukemia	MR Egger	12.2907356267321	20	0.905705625438145			PPARGC1A	Acute lymphocytic leukaemia	MR Egger	0.0221678749959076	1	0.881641378400838
CPNE3	Acute Lymphoblastic Leukemia	Inverse variance weighted	12.9640226605838	21	0.909878881697414			PPARGC1A	Acute lymphocytic leukaemia	Inverse variance weighted	1.38349714628736	2	0.500699792961873
CPNE5	Acute Lymphoblastic Leukemia	MR Egger	5.74732279697449	10	0.836026479402198			PIEZO1	Acute lymphocytic leukaemia	MR Egger	0.0222185423709216	1	0.881507191754162
CPNE5	Acute Lymphoblastic Leukemia	Inverse variance weighted	6.40915162533947	11	0.844718504535371			PIEZO1	Acute lymphocytic leukaemia	Inverse variance weighted	1.36042430489932	2	0.506509523729891
CPSF2	Acute Lymphoblastic Leukemia	MR Egger	15.8286138223597	19	0.668680718555096			PCDHGB1	Acute lymphocytic leukaemia	MR Egger	9.22312354960062	4	0.0557580935842795
CPSF2	Acute Lymphoblastic Leukemia	Inverse variance weighted	15.8877677812501	20	0.723562096607437			PCDHGB1	Acute lymphocytic leukaemia	Inverse variance weighted	11.9569805491245	5	0.0353820248276034
CPT2	Acute Lymphoblastic Leukemia	MR Egger	8.20364498408439	10	0.608952681764189			DLX4	Acute lymphocytic leukaemia	MR Egger	3.15070678508094	3	0.3689677313111
CPT2	Acute Lymphoblastic Leukemia	Inverse variance weighted	9.87557706896051	11	0.54161268638135			DLX4	Acute lymphocytic leukaemia	Inverse variance weighted	3.15092304550414	4	0.532893987386953
CPVL	Acute Lymphoblastic Leukemia	MR Egger	31.3387870354615	40	0.834625934987154			AAGAB	Acute lymphocytic leukaemia	MR Egger	11.2681026397358	8	0.186965945912979
CPVL	Acute Lymphoblastic Leukemia	Inverse variance weighted	31.8130448094972	41	0.84776523383877			AAGAB	Acute lymphocytic leukaemia	Inverse variance weighted	13.1591609024694	9	0.155535665274654
CREG1	Acute Lymphoblastic Leukemia	MR Egger	18.5198812336231	19	0.4880004135722			INTS3	Acute lymphocytic leukaemia	MR Egger	0.00426825348746984	1	0.9479097664267
CREG1	Acute Lymphoblastic Leukemia	Inverse variance weighted	21.7452071924377	20	0.354494922010809			INTS3	Acute lymphocytic leukaemia	Inverse variance weighted	0.774449694049672	2	0.678938420479191
CRHR1-IT1	Acute Lymphoblastic Leukemia	MR Egger	48.664412376223	51	0.566928566472565			IGDCC3	Acute lymphocytic leukaemia	MR Egger	0.839083726918458	2	0.657347905936222
CRHR1-IT1	Acute Lymphoblastic Leukemia	Inverse variance weighted	51.6485731117164	52	0.487662673932847			IGDCC3	Acute lymphocytic leukaemia	Inverse variance weighted	2.71943022243271	3	0.436935424107952
CRIP1P1	Acute Lymphoblastic Leukemia	MR Egger	3.69289567095122	15	0.998582106283865			ARHGAP1	Acute lymphocytic leukaemia	MR Egger	2.06750379161231	2	0.35567001725534
CRIP1P1	Acute Lymphoblastic Leukemia	Inverse variance weighted	4.18773106006381	16	0.998540624383347			ARHGAP1	Acute lymphocytic leukaemia	Inverse variance weighted	2.28704991590879	3	0.515006338062407
CSNK1D	Acute Lymphoblastic Leukemia	MR Egger	4.91502214910226	11	0.935211983398106			CRABP1	Acute lymphocytic leukaemia	MR Egger	8.89740935259992	7	0.260105832725565
CSNK1D	Acute Lymphoblastic Leukemia	Inverse variance weighted	5.60505673041924	12	0.934668959706118			CRABP1	Acute lymphocytic leukaemia	Inverse variance weighted	9.98067855190557	8	0.266384649813094
CSRNP2	Acute Lymphoblastic Leukemia	MR Egger	4.10453011103627	4	0.392044039685002			S100A2	Acute lymphocytic leukaemia	MR Egger	0.875164167456583	1	0.34952960480718
CSRNP2	Acute Lymphoblastic Leukemia	Inverse variance weighted	4.25901604467712	5	0.512758054467007			S100A2	Acute lymphocytic leukaemia	Inverse variance weighted	1.01554029248371	2	0.601836090152107
CSTA	Acute Lymphoblastic Leukemia	MR Egger	42.0995681988217	48	0.712257688443754			EMC1	Acute lymphocytic leukaemia	MR Egger	3.39535001554394	3	0.334590647486045
CSTA	Acute Lymphoblastic Leukemia	Inverse variance weighted	42.9646742595946	49	0.71516406346621			EMC1	Acute lymphocytic leukaemia	Inverse variance weighted	3.55420721507811	4	0.469684028216742
CTA-126B4.7	Acute Lymphoblastic Leukemia	MR Egger	19.9069024668406	17	0.279018730883598			TJP1	Acute lymphocytic leukaemia	MR Egger	4.31545535154111	3	0.229353830403103
CTA-126B4.7	Acute Lymphoblastic Leukemia	Inverse variance weighted	20.8820583594026	18	0.285405065155395			TJP1	Acute lymphocytic leukaemia	Inverse variance weighted	4.32829010811462	4	0.363395989164764
CTA-250D10.23	Acute Lymphoblastic Leukemia	MR Egger	4.83543206321563	4	0.304603749002321			CD7	Acute lymphocytic leukaemia	MR Egger	0.763196833825735	4	0.943312827483457
CTA-250D10.23	Acute Lymphoblastic Leukemia	Inverse variance weighted	5.06426723256489	5	0.408087426203069			CD7	Acute lymphocytic leukaemia	Inverse variance weighted	0.804646732066028	5	0.976736014174999
CTA-29F11.1	Acute Lymphoblastic Leukemia	MR Egger	25.7475724322932	18	0.105671257741973			PTS	Acute lymphocytic leukaemia	MR Egger	3.4994239908611	2	0.173823998347884
CTA-29F11.1	Acute Lymphoblastic Leukemia	Inverse variance weighted	25.8697859523408	19	0.133858393874107			PTS	Acute lymphocytic leukaemia	Inverse variance weighted	4.46212033784562	3	0.215694055500679
CTB-114C7.4	Acute Lymphoblastic Leukemia	MR Egger	9.73282349648084	11	0.554568012313592			SMAD4	Acute lymphocytic leukaemia	MR Egger	1.90113774214727	2	0.386521080238868
CTB-114C7.4	Acute Lymphoblastic Leukemia	Inverse variance weighted	11.2312747573177	12	0.509209343559776			SMAD4	Acute lymphocytic leukaemia	Inverse variance weighted	1.93893915835977	3	0.585176325074988
CTB-55O6.12	Acute Lymphoblastic Leukemia	MR Egger	10.3235956487244	15	0.798906296588834			DES	Acute lymphocytic leukaemia	MR Egger	10.965429963952	7	0.14013407385909
CTB-55O6.12	Acute Lymphoblastic Leukemia	Inverse variance weighted	11.9343419435978	16	0.748487061669389			DES	Acute lymphocytic leukaemia	Inverse variance weighted	11.7003509484723	8	0.165082537718071
CTB-55O6.8	Acute Lymphoblastic Leukemia	MR Egger	0.343016620639846	1	0.558093125344484			BUB1	Acute lymphocytic leukaemia	MR Egger	1.70341395272705	2	0.426685967102357
CTB-55O6.8	Acute Lymphoblastic Leukemia	Inverse variance weighted	0.748746764451031	2	0.687720081429474			BUB1	Acute lymphocytic leukaemia	Inverse variance weighted	5.07370401052704	3	0.166479049025809
CTBP1-AS1	Acute Lymphoblastic Leukemia	MR Egger	7.92047742176145	10	0.636604457353624			HSPA1L	Acute lymphocytic leukaemia	MR Egger	17.9860933273167	8	0.0213309886478236
CTBP1-AS1	Acute Lymphoblastic Leukemia	Inverse variance weighted	8.46695340217914	11	0.670964265244107			HSPA1L	Acute lymphocytic leukaemia	Inverse variance weighted	19.9042529200899	9	0.0185125758959689
CTC-429P9.3	Acute Lymphoblastic Leukemia	MR Egger	1.60842886068604	2	0.447439283257975			TARDBP	Acute lymphocytic leukaemia	MR Egger	4.51866976536399	2	0.104419913155774
CTC-429P9.3	Acute Lymphoblastic Leukemia	Inverse variance weighted	2.41855415267842	3	0.490190118719182			TARDBP	Acute lymphocytic leukaemia	Inverse variance weighted	4.63142632340363	3	0.20086269131322
CTC-459F4.3	Acute Lymphoblastic Leukemia	MR Egger	13.2816689607853	15	0.580551888119427			RPS6KA1	Acute lymphocytic leukaemia	MR Egger	17.7458448548328	13	0.167410170994393
CTC-459F4.3	Acute Lymphoblastic Leukemia	Inverse variance weighted	14.0087338303999	16	0.598063153314993			RPS6KA1	Acute lymphocytic leukaemia	Inverse variance weighted	17.7794831302915	14	0.217009601940597
CTC-462L7.1	Acute Lymphoblastic Leukemia	MR Egger	4.88000979481336	14	0.987413455072992			EEF2K	Acute lymphocytic leukaemia	MR Egger	1.80923875317386	2	0.404695892523612
CTC-462L7.1	Acute Lymphoblastic Leukemia	Inverse variance weighted	5.35150034847808	15	0.988708754362616			EEF2K	Acute lymphocytic leukaemia	Inverse variance weighted	2.31882409622888	3	0.508924305043511
CTC-484P3.1	Acute Lymphoblastic Leukemia	MR Egger	15.4352693387911	24	0.907374222393314			RPIA	Acute lymphocytic leukaemia	MR Egger	2.01911439326783	3	0.568448934339912
CTC-484P3.1	Acute Lymphoblastic Leukemia	Inverse variance weighted	16.3052876788974	25	0.905433478975252			RPIA	Acute lymphocytic leukaemia	Inverse variance weighted	2.93246399268984	4	0.569190263767779
CTC-490E21.10	Acute Lymphoblastic Leukemia	MR Egger	0.161754272480942	2	0.922307002589327			SHMT1	Acute lymphocytic leukaemia	MR Egger	7.38867403423449	12	0.830896553438396
CTC-490E21.10	Acute Lymphoblastic Leukemia	Inverse variance weighted	0.573168723952536	3	0.902546355162829			SHMT1	Acute lymphocytic leukaemia	Inverse variance weighted	7.39020636770816	13	0.880939311605832
CTC-490G23.2	Acute Lymphoblastic Leukemia	MR Egger	31.1599376844567	31	0.458173862846476			EGFLAM	Acute lymphocytic leukaemia	MR Egger	8.44621763243261	13	0.813364935970633
CTC-490G23.2	Acute Lymphoblastic Leukemia	Inverse variance weighted	31.5538734929394	32	0.489020732117245			EGFLAM	Acute lymphocytic leukaemia	Inverse variance weighted	11.2336684262273	14	0.667589731772043
CTC-523E23.1	Acute Lymphoblastic Leukemia	MR Egger	14.2522281848548	22	0.892285870664708			DUSP6	Acute lymphocytic leukaemia	MR Egger	1.15202053780603	2	0.56213667264021
CTC-523E23.1	Acute Lymphoblastic Leukemia	Inverse variance weighted	14.2625979791513	23	0.919103981597407			DUSP6	Acute lymphocytic leukaemia	Inverse variance weighted	1.48362677920455	3	0.686054384245765
CTC-550B14.6	Acute Lymphoblastic Leukemia	MR Egger	22.0323105230434	18	0.230553808988527			ANAPC10	Acute lymphocytic leukaemia	MR Egger	0.216793910607357	1	0.641493731604489
CTC-550B14.6	Acute Lymphoblastic Leukemia	Inverse variance weighted	24.1625749156157	19	0.189989937960844			ANAPC10	Acute lymphocytic leukaemia	Inverse variance weighted	1.48262849704777	2	0.476487281128695
CTC-550B14.7	Acute Lymphoblastic Leukemia	MR Egger	25.4556255248089	17	0.0849660841406743			CCM2	Acute lymphocytic leukaemia	MR Egger	4.28546064623053	2	0.117334045424089
CTC-550B14.7	Acute Lymphoblastic Leukemia	Inverse variance weighted	25.519031523725	18	0.111274391083363			CCM2	Acute lymphocytic leukaemia	Inverse variance weighted	4.81449210553781	3	0.185895945716414
CTC-774J1.2	Acute Lymphoblastic Leukemia	MR Egger	5.9352948879772	9	0.746376400887635			ETS2	Acute lymphocytic leukaemia	MR Egger	4.61013982530815	6	0.594694809579783
CTC-774J1.2	Acute Lymphoblastic Leukemia	Inverse variance weighted	8.42665428293324	10	0.587236749175914			ETS2	Acute lymphocytic leukaemia	Inverse variance weighted	4.95257731331101	7	0.665750548569449
CTD-2006K23.1	Acute Lymphoblastic Leukemia	MR Egger	16.2820079367088	14	0.29645747862374			SNAP29	Acute lymphocytic leukaemia	MR Egger	0.818442620708669	1	0.365635900724061
CTD-2006K23.1	Acute Lymphoblastic Leukemia	Inverse variance weighted	16.5375584360244	15	0.347251682642716			SNAP29	Acute lymphocytic leukaemia	Inverse variance weighted	0.956276628944339	2	0.619936444869601
CTD-2010I16.1	Acute Lymphoblastic Leukemia	MR Egger	6.52196027245796	6	0.367322946519067			CRYGD	Acute lymphocytic leukaemia	MR Egger	0.145993118234261	2	0.929604028678867
CTD-2010I16.1	Acute Lymphoblastic Leukemia	Inverse variance weighted	7.32840016841862	7	0.395506139653931			CRYGD	Acute lymphocytic leukaemia	Inverse variance weighted	0.272804643949385	3	0.965059323417501
CTD-2017D11.1	Acute Lymphoblastic Leukemia	MR Egger	18.5127995913871	26	0.856327799780811			APOF	Acute lymphocytic leukaemia	MR Egger	5.71144994544095	8	0.679517262921616
CTD-2017D11.1	Acute Lymphoblastic Leukemia	Inverse variance weighted	19.1754570216127	27	0.863519477613239			APOF	Acute lymphocytic leukaemia	Inverse variance weighted	7.01059964981955	9	0.636015775492167
CTD-2054N24.2	Acute Lymphoblastic Leukemia	MR Egger	19.2331176202894	22	0.630892500470035			CDKN2D	Acute lymphocytic leukaemia	MR Egger	2.07865657984451	5	0.838157864553379
CTD-2054N24.2	Acute Lymphoblastic Leukemia	Inverse variance weighted	19.2400795090236	23	0.687205358834645			CDKN2D	Acute lymphocytic leukaemia	Inverse variance weighted	7.29638342148749	6	0.294305358647988
CTD-2085J24.4	Acute Lymphoblastic Leukemia	MR Egger	17.1815172768753	10	0.0704427252893894			TAPBP	Acute lymphocytic leukaemia	MR Egger	4.00265978302577	7	0.779471001852295
CTD-2085J24.4	Acute Lymphoblastic Leukemia	Inverse variance weighted	19.3213211457228	11	0.0555639749382324			TAPBP	Acute lymphocytic leukaemia	Inverse variance weighted	4.02556962958025	8	0.854809136346028
CTD-2192J16.20	Acute Lymphoblastic Leukemia	MR Egger	0.430092589251824	1	0.511943519609413			COPS7B	Acute lymphocytic leukaemia	MR Egger	29.8043512286088	18	0.0393925938778387
CTD-2192J16.20	Acute Lymphoblastic Leukemia	Inverse variance weighted	0.430275358279029	2	0.806430403889726			COPS7B	Acute lymphocytic leukaemia	Inverse variance weighted	29.8477199245545	19	0.0537687336528256
CTD-2240H23.2	Acute Lymphoblastic Leukemia	MR Egger	21.3731144362285	12	0.0451765644504121			CAPN3	Acute lymphocytic leukaemia	MR Egger	0.011357702275858	1	0.915128119305313
CTD-2240H23.2	Acute Lymphoblastic Leukemia	Inverse variance weighted	21.4976258286281	13	0.0636514879393072			CAPN3	Acute lymphocytic leukaemia	Inverse variance weighted	0.0118179003712907	2	0.994108473325391
CTD-2292M16.8	Acute Lymphoblastic Leukemia	MR Egger	3.63949624435902	7	0.820236941862709			RNPEP	Acute lymphocytic leukaemia	MR Egger	7.68291041139516	6	0.262266531326585
CTD-2292M16.8	Acute Lymphoblastic Leukemia	Inverse variance weighted	6.2093884239128	8	0.623790039795565			RNPEP	Acute lymphocytic leukaemia	Inverse variance weighted	9.0506982467252	7	0.249036593022706
CTD-2349P21.9	Acute Lymphoblastic Leukemia	MR Egger	0.0466127311127819	1	0.829065839510643			PDZD7	Acute lymphocytic leukaemia	MR Egger	2.89890955781368	2	0.234698215633923
CTD-2349P21.9	Acute Lymphoblastic Leukemia	Inverse variance weighted	0.564404937057647	2	0.754120983308969			PDZD7	Acute lymphocytic leukaemia	Inverse variance weighted	4.07797101770243	3	0.253166824951478
CTD-2368P22.1	Acute Lymphoblastic Leukemia	MR Egger	8.59602275724665	12	0.736993005731136			ARL1	Acute lymphocytic leukaemia	MR Egger	4.91036820713426	4	0.296618534412414
CTD-2368P22.1	Acute Lymphoblastic Leukemia	Inverse variance weighted	13.0378631906181	13	0.444891280529677			ARL1	Acute lymphocytic leukaemia	Inverse variance weighted	5.17370667446631	5	0.395050905514928
CTD-2510F5.4	Acute Lymphoblastic Leukemia	MR Egger	3.41725956946001	4	0.490570199389716			HIBCH	Acute lymphocytic leukaemia	MR Egger	0.338486270746336	1	0.560704280978627
CTD-2510F5.4	Acute Lymphoblastic Leukemia	Inverse variance weighted	3.4663304175922	5	0.628488277462562			HIBCH	Acute lymphocytic leukaemia	Inverse variance weighted	1.00599271116607	2	0.604715998227349
CTD-2516F10.2	Acute Lymphoblastic Leukemia	MR Egger	10.4970877979018	16	0.839413436125736			CCDC50	Acute lymphocytic leukaemia	MR Egger	8.16014292297437	4	0.0858849960595361
CTD-2516F10.2	Acute Lymphoblastic Leukemia	Inverse variance weighted	10.9520565459857	17	0.859045428875187			CCDC50	Acute lymphocytic leukaemia	Inverse variance weighted	8.65746183799934	5	0.123531910427141
CTD-2517M22.14	Acute Lymphoblastic Leukemia	MR Egger	7.90098698759873	13	0.849990390399466			UBE2T	Acute lymphocytic leukaemia	MR Egger	0.0722867714494263	1	0.788035885292031
CTD-2517M22.14	Acute Lymphoblastic Leukemia	Inverse variance weighted	8.05490757631373	14	0.886445868915512			UBE2T	Acute lymphocytic leukaemia	Inverse variance weighted	2.87917084513682	2	0.237026003947516
CTD-2540F13.2	Acute Lymphoblastic Leukemia	MR Egger	1.42381745884505	3	0.699961406325264			STAMBPL1	Acute lymphocytic leukaemia	MR Egger	1.14573351635419	2	0.56390653563431
CTD-2540F13.2	Acute Lymphoblastic Leukemia	Inverse variance weighted	2.43956334485875	4	0.655489609518756			STAMBPL1	Acute lymphocytic leukaemia	Inverse variance weighted	2.50066885392838	3	0.475170218587996
CTD-2561B21.11	Acute Lymphoblastic Leukemia	MR Egger	4.4424217565193	8	0.815165610283462			MAX	Acute lymphocytic leukaemia	MR Egger	2.74690438265461	1	0.0974429211347908
CTD-2561B21.11	Acute Lymphoblastic Leukemia	Inverse variance weighted	5.19354791807873	9	0.817120274719248			MAX	Acute lymphocytic leukaemia	Inverse variance weighted	2.8326832517866	2	0.242599916686053
CTD-2587H19.1	Acute Lymphoblastic Leukemia	MR Egger	8.68120964669233	16	0.925959013282143			EDF1	Acute lymphocytic leukaemia	MR Egger	5.78756	3	0.12241586394115
CTD-2587H19.1	Acute Lymphoblastic Leukemia	Inverse variance weighted	10.6297943893638	17	0.875149334713708			EDF1	Acute lymphocytic leukaemia	Inverse variance weighted	5.88013860718916	4	0.208280199947401
CTD-2623N2.3	Acute Lymphoblastic Leukemia	MR Egger	4.55549428718458	8	0.803855742491318			TPRKB	Acute lymphocytic leukaemia	MR Egger	5.06800331691695	5	0.407637518575886
CTD-2623N2.3	Acute Lymphoblastic Leukemia	Inverse variance weighted	5.34489155743969	9	0.803266777253021			TPRKB	Acute lymphocytic leukaemia	Inverse variance weighted	6.51368058297037	6	0.368167781940467
CTD-3099C6.11	Acute Lymphoblastic Leukemia	MR Egger	2.71092996948874	7	0.910394843597256			GPD1L	Acute lymphocytic leukaemia	MR Egger	21.0232914862614	12	0.0500404220608557
CTD-3099C6.11	Acute Lymphoblastic Leukemia	Inverse variance weighted	5.06785250477106	8	0.750299962003215			GPD1L	Acute lymphocytic leukaemia	Inverse variance weighted	21.275126943584	13	0.0676621628818372
CTD-3099C6.9	Acute Lymphoblastic Leukemia	MR Egger	7.84741002395893	5	0.164848086946188			A1CF	Acute lymphocytic leukaemia	MR Egger	2.06430676174829	2	0.356239015743921
CTD-3099C6.9	Acute Lymphoblastic Leukemia	Inverse variance weighted	8.7046942438585	6	0.190879591687398			A1CF	Acute lymphocytic leukaemia	Inverse variance weighted	3.43771958928329	3	0.328929966890052
CTD-3131K8.2	Acute Lymphoblastic Leukemia	MR Egger	11.3374543948364	11	0.415440743207302			ARF6	Acute lymphocytic leukaemia	MR Egger	5.6161809543854	2	0.0603200650304078
CTD-3131K8.2	Acute Lymphoblastic Leukemia	Inverse variance weighted	11.5131460499919	12	0.485527277321929			ARF6	Acute lymphocytic leukaemia	Inverse variance weighted	11.2834853884525	3	0.0102876932634205
CTD-3138B18.5	Acute Lymphoblastic Leukemia	MR Egger	2.05491863179407	2	0.35791515570845			CDC25B	Acute lymphocytic leukaemia	MR Egger	5.10600533745791	3	0.164197457451442
CTD-3138B18.5	Acute Lymphoblastic Leukemia	Inverse variance weighted	2.75055253561072	3	0.431704665540387			CDC25B	Acute lymphocytic leukaemia	Inverse variance weighted	5.99470074395145	4	0.199544374792133
CTD-3162L10.1	Acute Lymphoblastic Leukemia	MR Egger	16.0492154434671	13	0.246482457671347			PELO	Acute lymphocytic leukaemia	MR Egger	0.442251246353015	1	0.506037871308206
CTD-3162L10.1	Acute Lymphoblastic Leukemia	Inverse variance weighted	16.3507823929677	14	0.292425025152522			PELO	Acute lymphocytic leukaemia	Inverse variance weighted	1.08332096411028	2	0.581781412290709
CTGLF12P	Acute Lymphoblastic Leukemia	MR Egger	4.44767613947335	5	0.486914566361923			CACYBP	Acute lymphocytic leukaemia	MR Egger	2.30431167719462	3	0.511695407370722
CTGLF12P	Acute Lymphoblastic Leukemia	Inverse variance weighted	5.03679696585407	6	0.539102374791855			CACYBP	Acute lymphocytic leukaemia	Inverse variance weighted	2.53405986234724	4	0.638547408317522
CTNNA2	Acute Lymphoblastic Leukemia	MR Egger	4.22075921334294	4	0.37695297732056			ARL11	Acute lymphocytic leukaemia	MR Egger	5.00423237189465	5	0.415363880533959
CTNNA2	Acute Lymphoblastic Leukemia	Inverse variance weighted	4.22178306463609	5	0.51794646293007			ARL11	Acute lymphocytic leukaemia	Inverse variance weighted	5.89882224199814	6	0.434619109875984
CTNNAL1	Acute Lymphoblastic Leukemia	MR Egger	23.3802143689561	25	0.55537180892067			GSTO1	Acute lymphocytic leukaemia	MR Egger	14.5977676213926	15	0.480759542643066
CTNNAL1	Acute Lymphoblastic Leukemia	Inverse variance weighted	33.4946211511683	26	0.148227229508817			GSTO1	Acute lymphocytic leukaemia	Inverse variance weighted	16.3267256391067	16	0.430399618779582
CTSC	Acute Lymphoblastic Leukemia	MR Egger	43.4957118542226	52	0.793295219956455			ULK3	Acute lymphocytic leukaemia	MR Egger	1.60042699898746	2	0.449233042850799
CTSC	Acute Lymphoblastic Leukemia	Inverse variance weighted	43.7716048082404	53	0.812887343905761			ULK3	Acute lymphocytic leukaemia	Inverse variance weighted	2.95499845863467	3	0.398615696801489
CTSD	Acute Lymphoblastic Leukemia	MR Egger	4.0566663356248	8	0.851974953020424			IRF9	Acute lymphocytic leukaemia	MR Egger	0.119637829646294	1	0.729427624855578
CTSD	Acute Lymphoblastic Leukemia	Inverse variance weighted	4.2282648363259	9	0.895756474996854			IRF9	Acute lymphocytic leukaemia	Inverse variance weighted	0.826057946428538	2	0.661643112622467
CTSF	Acute Lymphoblastic Leukemia	MR Egger	32.7961652929653	39	0.747601340168647			ANKRD27	Acute lymphocytic leukaemia	MR Egger	7.32072633594824	4	0.119879310296637
CTSF	Acute Lymphoblastic Leukemia	Inverse variance weighted	32.8260831325018	40	0.782293409832685			ANKRD27	Acute lymphocytic leukaemia	Inverse variance weighted	9.25858506319812	5	0.0991840474353799
CTSS	Acute Lymphoblastic Leukemia	MR Egger	33.9871745071462	26	0.135347453619734			PPIH	Acute lymphocytic leukaemia	MR Egger	4.36297751548722	4	0.359105339877175
CTSS	Acute Lymphoblastic Leukemia	Inverse variance weighted	34.1125859906186	27	0.16279887934847			PPIH	Acute lymphocytic leukaemia	Inverse variance weighted	4.88374047997748	5	0.430232942044595
CUTA	Acute Lymphoblastic Leukemia	MR Egger	6.47618473401364	10	0.773796771873839			PMVK	Acute lymphocytic leukaemia	MR Egger	8.08029112037588	6	0.232279810813422
CUTA	Acute Lymphoblastic Leukemia	Inverse variance weighted	8.00573133938262	11	0.712790331322577			PMVK	Acute lymphocytic leukaemia	Inverse variance weighted	8.09220150621079	7	0.324533968680778
CWC15	Acute Lymphoblastic Leukemia	MR Egger	0.801837134242371	3	0.849027564807208			BACH1	Acute lymphocytic leukaemia	MR Egger	8.17704508872998	5	0.146744468481126
CWC15	Acute Lymphoblastic Leukemia	Inverse variance weighted	3.9776446143335	4	0.409039776522891			BACH1	Acute lymphocytic leukaemia	Inverse variance weighted	9.19034234504957	6	0.16315294178948
CYB5D1	Acute Lymphoblastic Leukemia	MR Egger	24.6799479995354	29	0.69474388854241			MYNN	Acute lymphocytic leukaemia	MR Egger	4.71556512897414	2	0.0946298262571065
CYB5D1	Acute Lymphoblastic Leukemia	Inverse variance weighted	24.6803240438517	30	0.74041366086735			MYNN	Acute lymphocytic leukaemia	Inverse variance weighted	5.98056481864807	3	0.112559627013155
CYLD	Acute Lymphoblastic Leukemia	MR Egger	9.13214456177013	11	0.609696147213369			PFKFB3	Acute lymphocytic leukaemia	MR Egger	5.61563771816048	4	0.229750277066021
CYLD	Acute Lymphoblastic Leukemia	Inverse variance weighted	9.82679993626259	12	0.631152303626024			PFKFB3	Acute lymphocytic leukaemia	Inverse variance weighted	6.14965274283812	5	0.291928268114687
CYP26B1	Acute Lymphoblastic Leukemia	MR Egger	44.3482826123243	40	0.293375931729165			ADI1	Acute lymphocytic leukaemia	MR Egger	0.372296021955935	1	0.541755391795509
CYP26B1	Acute Lymphoblastic Leukemia	Inverse variance weighted	44.9081528715558	41	0.311456539269931			ADI1	Acute lymphocytic leukaemia	Inverse variance weighted	0.497427389134423	2	0.779803203320821
CYP2D6	Acute Lymphoblastic Leukemia	MR Egger	21.6706833675501	23	0.540199627290646			PLEKHA1	Acute lymphocytic leukaemia	MR Egger	0.0132955557964222	1	0.908202300394133
CYP2D6	Acute Lymphoblastic Leukemia	Inverse variance weighted	21.6717037076461	24	0.598854392987296			PLEKHA1	Acute lymphocytic leukaemia	Inverse variance weighted	0.993832130193654	2	0.608404048002972
CYP2T2P	Acute Lymphoblastic Leukemia	MR Egger	25.8331759485008	38	0.933425514346074			PSMA7	Acute lymphocytic leukaemia	MR Egger	2.23678775468306	5	0.815504765652557
CYP2T2P	Acute Lymphoblastic Leukemia	Inverse variance weighted	25.9425500926698	39	0.946069889679914			PSMA7	Acute lymphocytic leukaemia	Inverse variance weighted	6.19727250641062	6	0.401458417296183
CYP4F22	Acute Lymphoblastic Leukemia	MR Egger	34.638670215636	31	0.298341436026121			SIRT5	Acute lymphocytic leukaemia	MR Egger	9.8253764483977	2	0.00735269604480089
CYP4F22	Acute Lymphoblastic Leukemia	Inverse variance weighted	34.7729	32	0.337262391614644			SIRT5	Acute lymphocytic leukaemia	Inverse variance weighted	10.0036162468975	3	0.0185354210367655
DAAM1	Acute Lymphoblastic Leukemia	MR Egger	34.2199411774253	30	0.272125247891557			KLHL13	Acute lymphocytic leukaemia	MR Egger	7.73165262873772	5	0.171658073210829
DAAM1	Acute Lymphoblastic Leukemia	Inverse variance weighted	34.2383617720274	31	0.31495613204187			KLHL13	Acute lymphocytic leukaemia	Inverse variance weighted	9.1432001224949	6	0.165683323341029
DAB2	Acute Lymphoblastic Leukemia	MR Egger	41.4691505145104	41	0.45016337373268			MAPRE1	Acute lymphocytic leukaemia	MR Egger	1.46674099988391	2	0.480287450102387
DAB2	Acute Lymphoblastic Leukemia	Inverse variance weighted	43.3645	42	0.412963974532301			MAPRE1	Acute lymphocytic leukaemia	Inverse variance weighted	1.46682794425148	3	0.689947309958531
DARC	Acute Lymphoblastic Leukemia	MR Egger	11.0655944334066	13	0.60532248261407			STAU1	Acute lymphocytic leukaemia	MR Egger	5.46446569024296	5	0.361858082257669
DARC	Acute Lymphoblastic Leukemia	Inverse variance weighted	12.0299802540663	14	0.603895036133693			STAU1	Acute lymphocytic leukaemia	Inverse variance weighted	6.13202296098234	6	0.408564595768926
DAXX	Acute Lymphoblastic Leukemia	MR Egger	3.25696632711697	7	0.860257095760936			KCTD5	Acute lymphocytic leukaemia	MR Egger	5.90447676821021	4	0.206396482808998
DAXX	Acute Lymphoblastic Leukemia	Inverse variance weighted	4.7256936325734	8	0.786451568613716			KCTD5	Acute lymphocytic leukaemia	Inverse variance weighted	5.91457093218885	5	0.314620509633243
DCAF16	Acute Lymphoblastic Leukemia	MR Egger	5.63598925556503	6	0.465175272610443			CLIC5	Acute lymphocytic leukaemia	MR Egger	7.24414955822141	9	0.611716330291826
DCAF16	Acute Lymphoblastic Leukemia	Inverse variance weighted	7.1005204428536	7	0.418489363903977			CLIC5	Acute lymphocytic leukaemia	Inverse variance weighted	7.33060691445992	10	0.693908284886408
DCHS1	Acute Lymphoblastic Leukemia	MR Egger	17.3291039243787	26	0.898803742895548			RPL30	Acute lymphocytic leukaemia	MR Egger	0.417593864681138	1	0.518140107260211
DCHS1	Acute Lymphoblastic Leukemia	Inverse variance weighted	18.2674596282202	27	0.895132520740031			RPL30	Acute lymphocytic leukaemia	Inverse variance weighted	0.504534509229934	2	0.77703704358063
DCP2	Acute Lymphoblastic Leukemia	MR Egger	10.6211731352901	14	0.7155059274535			PRKAR1B	Acute lymphocytic leukaemia	MR Egger	0.709153880470379	2	0.701470144237256
DCP2	Acute Lymphoblastic Leukemia	Inverse variance weighted	11.3461316281528	15	0.727694044870675			PRKAR1B	Acute lymphocytic leukaemia	Inverse variance weighted	2.51855748953969	3	0.471946662997735
DCXR	Acute Lymphoblastic Leukemia	MR Egger	33.8994634771326	44	0.864263904371125			OTUD5	Acute lymphocytic leukaemia	MR Egger	5.19855672588305	5	0.392131952542584
DCXR	Acute Lymphoblastic Leukemia	Inverse variance weighted	33.9055251546766	45	0.886938669973055			OTUD5	Acute lymphocytic leukaemia	Inverse variance weighted	5.26373533868702	6	0.510459107703401
DDA1	Acute Lymphoblastic Leukemia	MR Egger	3.64521165009962	3	0.302411232632885			BPTF	Acute lymphocytic leukaemia	MR Egger	3.11966196514085	3	0.373541089871835
DDA1	Acute Lymphoblastic Leukemia	Inverse variance weighted	4.93972808558929	4	0.293537866689598			BPTF	Acute lymphocytic leukaemia	Inverse variance weighted	3.99064095702997	4	0.407273940218995
DDAH1	Acute Lymphoblastic Leukemia	MR Egger	0.531218448518534	2	0.766738691846223			PITPNB	Acute lymphocytic leukaemia	MR Egger	6.07744011089242	6	0.414571385993932
DDAH1	Acute Lymphoblastic Leukemia	Inverse variance weighted	0.867416275847045	3	0.833283026478023			PITPNB	Acute lymphocytic leukaemia	Inverse variance weighted	6.1298310053179	7	0.524674220454266
DDX11	Acute Lymphoblastic Leukemia	MR Egger	101.965666566871	97	0.345207			GLRX2	Acute lymphocytic leukaemia	MR Egger	4.00642998387718	5	0.548490561105807
DDX11	Acute Lymphoblastic Leukemia	Inverse variance weighted	106.809281341002	98	0.2550741059715			GLRX2	Acute lymphocytic leukaemia	Inverse variance weighted	4.00667199643768	6	0.675773460492126
DDX39B	Acute Lymphoblastic Leukemia	MR Egger	10.9041075509137	10	0.365037601298239			MCTS1	Acute lymphocytic leukaemia	MR Egger	2.7100559563641	3	0.438521094031828
DDX39B	Acute Lymphoblastic Leukemia	Inverse variance weighted	11.0340904934672	11	0.440411714830729			MCTS1	Acute lymphocytic leukaemia	Inverse variance weighted	4.96274172011639	4	0.291141836898217
DDX50	Acute Lymphoblastic Leukemia	MR Egger	0.47807638230408	1	0.489294930758404			LAMTOR3	Acute lymphocytic leukaemia	MR Egger	0.430790371137426	2	0.806222769610752
DDX50	Acute Lymphoblastic Leukemia	Inverse variance weighted	1.08285425386442	2	0.581917189805268			LAMTOR3	Acute lymphocytic leukaemia	Inverse variance weighted	0.439468072389857	3	0.93197388637016
DDX51	Acute Lymphoblastic Leukemia	MR Egger	2.89379512496776	3	0.408291387422228			OTUB2	Acute lymphocytic leukaemia	MR Egger	0.149097564522873	1	0.69939925383409
DDX51	Acute Lymphoblastic Leukemia	Inverse variance weighted	4.87746416648965	4	0.300103080926965			OTUB2	Acute lymphocytic leukaemia	Inverse variance weighted	6.59455889125924	2	0.036983646681205
DDX59	Acute Lymphoblastic Leukemia	MR Egger	83.0305898148399	58	0.0172248052251149			GABARAPL2	Acute lymphocytic leukaemia	MR Egger	5.61586420758962	6	0.467565010711441
DDX59	Acute Lymphoblastic Leukemia	Inverse variance weighted	83.0507118067059	59	0.0212405421439069			GABARAPL2	Acute lymphocytic leukaemia	Inverse variance weighted	5.74817344819754	7	0.569442254824982
DDX60L	Acute Lymphoblastic Leukemia	MR Egger	28.5742447495959	51	0.995330093884211			NUDT16L1	Acute lymphocytic leukaemia	MR Egger	1.16108346152454	1	0.281240953351724
DDX60L	Acute Lymphoblastic Leukemia	Inverse variance weighted	28.5885912192589	52	0.996595230601625			NUDT16L1	Acute lymphocytic leukaemia	Inverse variance weighted	3.97146500573046	2	0.137280019270991
DEAF1	Acute Lymphoblastic Leukemia	MR Egger	16.1924386476481	20	0.704616175598272			TAX1BP3	Acute lymphocytic leukaemia	MR Egger	2.83532022619452	5	0.72535656157071
DEAF1	Acute Lymphoblastic Leukemia	Inverse variance weighted	16.8163127547883	21	0.722179170066704			TAX1BP3	Acute lymphocytic leukaemia	Inverse variance weighted	3.31506920033963	6	0.768388879726584
DEFA4	Acute Lymphoblastic Leukemia	MR Egger	0.388754458875223	1	0.5329548385906			SH3GL2	Acute lymphocytic leukaemia	MR Egger	0.33109013133811	1	0.56501788324032
DEFA4	Acute Lymphoblastic Leukemia	Inverse variance weighted	0.392716928060518	2	0.821717625666143			SH3GL2	Acute lymphocytic leukaemia	Inverse variance weighted	1.89206722036326	2	0.388278035291273
DENND1A	Acute Lymphoblastic Leukemia	MR Egger	25.9169538507525	18	0.101671968280178			UBA2	Acute lymphocytic leukaemia	MR Egger	3.65521506105572	5	0.60004252162411
DENND1A	Acute Lymphoblastic Leukemia	Inverse variance weighted	28.6576052606205	19	0.0715650453951056			UBA2	Acute lymphocytic leukaemia	Inverse variance weighted	3.94922046720592	6	0.683548307115063
DEPDC5	Acute Lymphoblastic Leukemia	MR Egger	3.92752428417025	12	0.984708939204245			TBCA	Acute lymphocytic leukaemia	MR Egger	14.4399588605719	9	0.107513184909793
DEPDC5	Acute Lymphoblastic Leukemia	Inverse variance weighted	3.95837186436853	13	0.991626181978451			TBCA	Acute lymphocytic leukaemia	Inverse variance weighted	20.1451558226034	10	0.0279092686238947
DERL1	Acute Lymphoblastic Leukemia	MR Egger	1.66014705157933	5	0.893881803182228			GPR68	Acute lymphocytic leukaemia	MR Egger	5.8588255419723	2	0.0534284036437136
DERL1	Acute Lymphoblastic Leukemia	Inverse variance weighted	2.32598493227578	6	0.887411818756846			GPR68	Acute lymphocytic leukaemia	Inverse variance weighted	5.88081528352752	3	0.117555013917287
DEXI	Acute Lymphoblastic Leukemia	MR Egger	13.6638957539594	23	0.936093431276963			LMOD1	Acute lymphocytic leukaemia	MR Egger	0.660568063988413	2	0.718719565086781
DEXI	Acute Lymphoblastic Leukemia	Inverse variance weighted	14.8178683889708	24	0.925974870352564			LMOD1	Acute lymphocytic leukaemia	Inverse variance weighted	2.94445460193506	3	0.400268707119164
DFNB31	Acute Lymphoblastic Leukemia	MR Egger	15.2559527614825	20	0.761579356126038			COMMD1	Acute lymphocytic leukaemia	MR Egger	0.898730230518105	2	0.638033100539979
DFNB31	Acute Lymphoblastic Leukemia	Inverse variance weighted	17.8339859080924	21	0.659484490287193			COMMD1	Acute lymphocytic leukaemia	Inverse variance weighted	8.42978448658799	3	0.0379162722354951
DGAT1	Acute Lymphoblastic Leukemia	MR Egger	17.6110968136259	22	0.728781264300188			STAP1	Acute lymphocytic leukaemia	MR Egger	2.28691825567086	4	0.683151800293834
DGAT1	Acute Lymphoblastic Leukemia	Inverse variance weighted	17.8160527958228	23	0.767389199642586			STAP1	Acute lymphocytic leukaemia	Inverse variance weighted	3.33111173201985	5	0.649081962817597
DGCR6L	Acute Lymphoblastic Leukemia	MR Egger	1.78526651979383	4	0.775176804114891			SLC41A2	Acute lymphocytic leukaemia	MR Egger	0.455289554933194	2	0.796407111346577
DGCR6L	Acute Lymphoblastic Leukemia	Inverse variance weighted	1.92144654387813	5	0.859904166950341			SLC41A2	Acute lymphocytic leukaemia	Inverse variance weighted	1.53361382827438	3	0.674534286785536
DHRS4-AS1	Acute Lymphoblastic Leukemia	MR Egger	22.2085278967396	13	0.0522138184898035			METTL1	Acute lymphocytic leukaemia	MR Egger	6.16839456633951	6	0.40459340450368
DHRS4-AS1	Acute Lymphoblastic Leukemia	Inverse variance weighted	22.674504530233	14	0.0657765966019385			METTL1	Acute lymphocytic leukaemia	Inverse variance weighted	11.4150138291942	7	0.121512896498053
DHX32	Acute Lymphoblastic Leukemia	MR Egger	51.0753020440687	56	0.66137056034751			UCK2	Acute lymphocytic leukaemia	MR Egger	2.75168649549031	1	0.0971519047241503
DHX32	Acute Lymphoblastic Leukemia	Inverse variance weighted	51.1562605920368	57	0.692934461042684			UCK2	Acute lymphocytic leukaemia	Inverse variance weighted	2.89519283413814	2	0.235134775358577
DHX36	Acute Lymphoblastic Leukemia	MR Egger	11.0117755912385	21	0.962557005178456			TEAD4	Acute lymphocytic leukaemia	MR Egger	0.0562291311710763	1	0.812558402350004
DHX36	Acute Lymphoblastic Leukemia	Inverse variance weighted	13.0709010706739	22	0.931164985683288			TEAD4	Acute lymphocytic leukaemia	Inverse variance weighted	2.52916453373909	2	0.282357221474183
DICER1	Acute Lymphoblastic Leukemia	MR Egger	21.538285428883	13	0.062941761548472			PDCD5	Acute lymphocytic leukaemia	MR Egger	2.69213564400491	3	0.441565414112841
DICER1	Acute Lymphoblastic Leukemia	Inverse variance weighted	23.4356255188257	14	0.0535403151684977			PDCD5	Acute lymphocytic leukaemia	Inverse variance weighted	7.08197797420361	4	0.131618964911606
DIXDC1	Acute Lymphoblastic Leukemia	MR Egger	10.4027814743457	15	0.79366843597873			CDKN2C	Acute lymphocytic leukaemia	MR Egger	6.82267533176178	5	0.234165732770311
DIXDC1	Acute Lymphoblastic Leukemia	Inverse variance weighted	10.4165713630069	16	0.843987881135684			CDKN2C	Acute lymphocytic leukaemia	Inverse variance weighted	7.9214667437468	6	0.243913516174721
DKK3	Acute Lymphoblastic Leukemia	MR Egger	31.2839094713276	42	0.88728825181956			RAD23B	Acute lymphocytic leukaemia	MR Egger	0.0802304488909918	1	0.776985356267757
DKK3	Acute Lymphoblastic Leukemia	Inverse variance weighted	33.8163691489821	43	0.840813444215031			RAD23B	Acute lymphocytic leukaemia	Inverse variance weighted	0.396914599618438	2	0.819994783926578
DNAH7	Acute Lymphoblastic Leukemia	MR Egger	7.1955386278289	5	0.206499304866623			SAT2	Acute lymphocytic leukaemia	MR Egger	3.92582500569726	4	0.416137408397603
DNAH7	Acute Lymphoblastic Leukemia	Inverse variance weighted	7.81997077357625	6	0.251591690968005			SAT2	Acute lymphocytic leukaemia	Inverse variance weighted	4.34159942138489	5	0.501352310960612
DNAI2	Acute Lymphoblastic Leukemia	MR Egger	12.9152119738002	17	0.741843317991859			THRA	Acute lymphocytic leukaemia	MR Egger	5.95861685770623	3	0.11364105532417
DNAI2	Acute Lymphoblastic Leukemia	Inverse variance weighted	13.9047408511452	18	0.735279628010819			THRA	Acute lymphocytic leukaemia	Inverse variance weighted	6.23792977144227	4	0.18207019212225
DNAJC1	Acute Lymphoblastic Leukemia	MR Egger	0.849479842086698	3	0.837599107983594			WRNIP1	Acute lymphocytic leukaemia	MR Egger	0.0446676997679829	1	0.832616242091176
DNAJC1	Acute Lymphoblastic Leukemia	Inverse variance weighted	2.16872304677046	4	0.70475930992268			WRNIP1	Acute lymphocytic leukaemia	Inverse variance weighted	1.71958777951065	2	0.423249309346955
DNAJC15	Acute Lymphoblastic Leukemia	MR Egger	30.6543692098401	29	0.381896712616997			FKBP6	Acute lymphocytic leukaemia	MR Egger	13.5375814405111	11	0.259644497471584
DNAJC15	Acute Lymphoblastic Leukemia	Inverse variance weighted	30.663952743008	30	0.43205874132572			FKBP6	Acute lymphocytic leukaemia	Inverse variance weighted	13.9519715825616	12	0.303785806426645
DNAJC18	Acute Lymphoblastic Leukemia	MR Egger	7.92219925642544	13	0.848631628487184			CKS1B	Acute lymphocytic leukaemia	MR Egger	0.400229799548086	1	0.526970602687995
DNAJC18	Acute Lymphoblastic Leukemia	Inverse variance weighted	8.36074001158993	14	0.869698656472475			CKS1B	Acute lymphocytic leukaemia	Inverse variance weighted	1.65415091322257	2	0.437326397952934
DNAJC27-AS1	Acute Lymphoblastic Leukemia	MR Egger	2.76535418918659	3	0.429235035273222			CYTH2	Acute lymphocytic leukaemia	MR Egger	3.24743966129207	2	0.197163916917836
DNAJC27-AS1	Acute Lymphoblastic Leukemia	Inverse variance weighted	2.76614572432463	4	0.597690577006096			CYTH2	Acute lymphocytic leukaemia	Inverse variance weighted	4.74445788089211	3	0.191494457694935
DNAJC27	Acute Lymphoblastic Leukemia	MR Egger	11.9966232362719	15	0.679284635117138			PURA	Acute lymphocytic leukaemia	MR Egger	1.25779611226151	2	0.533179010753498
DNAJC27	Acute Lymphoblastic Leukemia	Inverse variance weighted	22.9622464191148	16	0.114747482210894			PURA	Acute lymphocytic leukaemia	Inverse variance weighted	1.33603646583334	3	0.720594164577267
DNAJC8	Acute Lymphoblastic Leukemia	MR Egger	1.60166128007474	1	0.205667941944748			RHOG	Acute lymphocytic leukaemia	MR Egger	2.27488015428636	1	0.131485288668331
DNAJC8	Acute Lymphoblastic Leukemia	Inverse variance weighted	1.86367012877882	2	0.393830342823994			RHOG	Acute lymphocytic leukaemia	Inverse variance weighted	2.5358240820807	2	0.281418599258422
DNASE2	Acute Lymphoblastic Leukemia	MR Egger	36.6112422363036	44	0.77769819271803			SMTN	Acute lymphocytic leukaemia	MR Egger	2.09584129196868	3	0.552754556380893
DNASE2	Acute Lymphoblastic Leukemia	Inverse variance weighted	37.9005686191101	45	0.764379002523589			SMTN	Acute lymphocytic leukaemia	Inverse variance weighted	2.17151485664082	4	0.704247540876995
DND1P1	Acute Lymphoblastic Leukemia	MR Egger	18.2965898933363	24	0.788388382014017			HPGDS	Acute lymphocytic leukaemia	MR Egger	12.5057608776404	14	0.565754891398023
DND1P1	Acute Lymphoblastic Leukemia	Inverse variance weighted	18.9449988494731	25	0.799750076000298			HPGDS	Acute lymphocytic leukaemia	Inverse variance weighted	12.8378962629812	15	0.614817217543516
DNHD1	Acute Lymphoblastic Leukemia	MR Egger	13.8396740870883	18	0.739481269715699			ITCH	Acute lymphocytic leukaemia	MR Egger	5.81197144517384	3	0.121125311768206
DNHD1	Acute Lymphoblastic Leukemia	Inverse variance weighted	13.9406620509139	19	0.787139338596624			ITCH	Acute lymphocytic leukaemia	Inverse variance weighted	6.06612852023608	4	0.194263885283863
DNM1	Acute Lymphoblastic Leukemia	MR Egger	0.0985085481654917	1	0.753626828937053			UBE2C	Acute lymphocytic leukaemia	MR Egger	1.01043878985142	1	0.314797741498589
DNM1	Acute Lymphoblastic Leukemia	Inverse variance weighted	0.099144824210835	2	0.951636245657304			UBE2C	Acute lymphocytic leukaemia	Inverse variance weighted	2.31924096227038	2	0.313605177381387
DNTT	Acute Lymphoblastic Leukemia	MR Egger	0.534209510520794	3	0.911313957253977			UBASH3B	Acute lymphocytic leukaemia	MR Egger	3.40977840073217	3	0.332653450274005
DNTT	Acute Lymphoblastic Leukemia	Inverse variance weighted	1.09456798440521	4	0.895133095797525			UBASH3B	Acute lymphocytic leukaemia	Inverse variance weighted	3.66479983660888	4	0.453266267885413
DNTTIP2	Acute Lymphoblastic Leukemia	MR Egger	0.547568475071275	2	0.760496144082484			NT5C	Acute lymphocytic leukaemia	MR Egger	4.95295492525675	1	0.0260461141884632
DNTTIP2	Acute Lymphoblastic Leukemia	Inverse variance weighted	0.801592978530508	3	0.849085976092302			NT5C	Acute lymphocytic leukaemia	Inverse variance weighted	4.97736259098899	2	0.0830193724427974
DOCK5	Acute Lymphoblastic Leukemia	MR Egger	34.273621575222	21	0.0338681630014394			PKN1	Acute lymphocytic leukaemia	MR Egger	4.16256500525628	3	0.244436664671029
DOCK5	Acute Lymphoblastic Leukemia	Inverse variance weighted	35.0896230682926	22	0.0379177102542138			PKN1	Acute lymphocytic leukaemia	Inverse variance weighted	4.36071773257716	4	0.359383640413594
DOCK8	Acute Lymphoblastic Leukemia	MR Egger	25.8511426937198	38	0.933079636029575			TNFAIP8	Acute lymphocytic leukaemia	MR Egger	0.479455677697774	1	0.488668975744807
DOCK8	Acute Lymphoblastic Leukemia	Inverse variance weighted	27.0639028045036	39	0.925510359844608			TNFAIP8	Acute lymphocytic leukaemia	Inverse variance weighted	1.26999922914483	2	0.529935692569363
DOK1	Acute Lymphoblastic Leukemia	MR Egger	0.000110528340120482	1	0.991611797906003			ARL3	Acute lymphocytic leukaemia	MR Egger	0.0491955267934687	1	0.82446907615013
DOK1	Acute Lymphoblastic Leukemia	Inverse variance weighted	0.000960875606569353	2	0.999519677588476			ARL3	Acute lymphocytic leukaemia	Inverse variance weighted	1.12651253899203	2	0.569352078261963
DOK2	Acute Lymphoblastic Leukemia	MR Egger	12.5892303994074	22	0.943988449597487			EFS	Acute lymphocytic leukaemia	MR Egger	7.11854556425406	6	0.310023258792266
DOK2	Acute Lymphoblastic Leukemia	Inverse variance weighted	12.5955659525693	23	0.960221985126652			EFS	Acute lymphocytic leukaemia	Inverse variance weighted	7.25324049176856	7	0.402997503588952
DOK6	Acute Lymphoblastic Leukemia	MR Egger	7.85224090463246	12	0.796568028398046			TRIM3	Acute lymphocytic leukaemia	MR Egger	0.20078557831294	1	0.654087495683921
DOK6	Acute Lymphoblastic Leukemia	Inverse variance weighted	7.85355042779047	13	0.853008504913027			TRIM3	Acute lymphocytic leukaemia	Inverse variance weighted	3.61077342876018	2	0.164410864236468
DPEP2	Acute Lymphoblastic Leukemia	MR Egger	12.6004100767307	16	0.701718957753449			MTHFD1	Acute lymphocytic leukaemia	MR Egger	2.95633562848603	6	0.814306896309675
DPEP2	Acute Lymphoblastic Leukemia	Inverse variance weighted	13.2465815240255	17	0.719528779532589			MTHFD1	Acute lymphocytic leukaemia	Inverse variance weighted	3.4357248312062	7	0.841985814718871
DPF2	Acute Lymphoblastic Leukemia	MR Egger	18.6830269599511	17	0.347026532081582			MAGEA3	Acute lymphocytic leukaemia	MR Egger	1.55491781191146	5	0.906646629332058
DPF2	Acute Lymphoblastic Leukemia	Inverse variance weighted	19.7253002455781	18	0.348495520676698			MAGEA3	Acute lymphocytic leukaemia	Inverse variance weighted	2.49034079418981	6	0.869547114410456
DPY19L2	Acute Lymphoblastic Leukemia	MR Egger	12.3095792523653	11	0.340828720419821			FEN1	Acute lymphocytic leukaemia	MR Egger	0.134103255760716	1	0.714215011126268
DPY19L2	Acute Lymphoblastic Leukemia	Inverse variance weighted	12.3378823457451	12	0.418939550206309			FEN1	Acute lymphocytic leukaemia	Inverse variance weighted	0.612008800843127	2	0.73638337905167
DSC2	Acute Lymphoblastic Leukemia	MR Egger	9.81565904466732	9	0.365613887905535			ARAF	Acute lymphocytic leukaemia	MR Egger	1.23978313395613	1	0.265512853289983
DSC2	Acute Lymphoblastic Leukemia	Inverse variance weighted	15.400533039828	10	0.118127126484846			ARAF	Acute lymphocytic leukaemia	Inverse variance weighted	2.74507773224285	2	0.253462634275883
DSE	Acute Lymphoblastic Leukemia	MR Egger	75.9422066558143	67	0.212554030873804			ERCC1	Acute lymphocytic leukaemia	MR Egger	0.224323363509506	2	0.893899718540949
DSE	Acute Lymphoblastic Leukemia	Inverse variance weighted	76.0792536884278	68	0.234602849812527			ERCC1	Acute lymphocytic leukaemia	Inverse variance weighted	4.24129553854458	3	0.236559802971582
DSEL	Acute Lymphoblastic Leukemia	MR Egger	0.693742640891825	4	0.952098333475433			ARL2	Acute lymphocytic leukaemia	MR Egger	24.8226278161659	11	0.00967744428547822
DSEL	Acute Lymphoblastic Leukemia	Inverse variance weighted	0.818215311357551	5	0.975856993560069			ARL2	Acute lymphocytic leukaemia	Inverse variance weighted	30.9483642029611	12	0.00200604166558028
DTD1	Acute Lymphoblastic Leukemia	MR Egger	8.1903768880356	12	0.770081685714511			OPHN1	Acute lymphocytic leukaemia	MR Egger	0.791509513499292	1	0.37364407174703
DTD1	Acute Lymphoblastic Leukemia	Inverse variance weighted	14.4182489658089	13	0.345061865901869			OPHN1	Acute lymphocytic leukaemia	Inverse variance weighted	0.960742948587883	2	0.618553572371216
DTWD2	Acute Lymphoblastic Leukemia	MR Egger	8.67440200934425	9	0.467856124537969			PDRG1	Acute lymphocytic leukaemia	MR Egger	0.533607875955472	2	0.765823205593478
DTWD2	Acute Lymphoblastic Leukemia	Inverse variance weighted	8.81727988749893	10	0.54952787464526			PDRG1	Acute lymphocytic leukaemia	Inverse variance weighted	2.2958272191042	3	0.513320772340486
DTX3L	Acute Lymphoblastic Leukemia	MR Egger	7.93576037296325	8	0.439770323813375			GCA	Acute lymphocytic leukaemia	MR Egger	1.82726564577032	2	0.401064577744251
DTX3L	Acute Lymphoblastic Leukemia	Inverse variance weighted	9.15834161542117	9	0.422788228838061			GCA	Acute lymphocytic leukaemia	Inverse variance weighted	2.3336206203261	3	0.506110703631288
DUSP23	Acute Lymphoblastic Leukemia	MR Egger	5.37255315619458	10	0.864943355696783			PABPC4	Acute lymphocytic leukaemia	MR Egger	1.71189677062856	2	0.424880049946224
DUSP23	Acute Lymphoblastic Leukemia	Inverse variance weighted	7.58984099022442	11	0.749505649244133			PABPC4	Acute lymphocytic leukaemia	Inverse variance weighted	1.74620785888525	3	0.626710060809788
DVL2	Acute Lymphoblastic Leukemia	MR Egger	1.10658825110207	3	0.775483896368554			SCMH1	Acute lymphocytic leukaemia	MR Egger	3.67774979106319	3	0.298429679113524
DVL2	Acute Lymphoblastic Leukemia	Inverse variance weighted	4.23105520072895	4	0.375638104034115			SCMH1	Acute lymphocytic leukaemia	Inverse variance weighted	3.80188873249501	4	0.433480685417185
DYNLT1	Acute Lymphoblastic Leukemia	MR Egger	7.09031803516553	12	0.851587651426358			EXOSC3	Acute lymphocytic leukaemia	MR Egger	0.59400809516823	1	0.440873385117639
DYNLT1	Acute Lymphoblastic Leukemia	Inverse variance weighted	8.52035594671993	13	0.808127685236026			EXOSC3	Acute lymphocytic leukaemia	Inverse variance weighted	0.612128963636282	2	0.736339137438903
E2F4	Acute Lymphoblastic Leukemia	MR Egger	0.0203177556042343	1	0.886653198334504			PSMB1	Acute lymphocytic leukaemia	MR Egger	1.35587024996921	2	0.507664173912934
E2F4	Acute Lymphoblastic Leukemia	Inverse variance weighted	1.74416486114017	2	0.418080019499148			PSMB1	Acute lymphocytic leukaemia	Inverse variance weighted	2.57282646291505	3	0.462273346234372
EEF1A1	Acute Lymphoblastic Leukemia	MR Egger	39.3705602457122	40	0.49841429696212			NRBP1	Acute lymphocytic leukaemia	MR Egger	6.29558043042897	5	0.278510726239092
EEF1A1	Acute Lymphoblastic Leukemia	Inverse variance weighted	40.1290123693927	41	0.509190110798024			NRBP1	Acute lymphocytic leukaemia	Inverse variance weighted	6.44110853366528	6	0.375630562882473
EFCAB2	Acute Lymphoblastic Leukemia	MR Egger	30.3914341216481	29	0.394658654805255			AKR1C1	Acute lymphocytic leukaemia	MR Egger	2.35572763912341	1	0.124823629815994
EFCAB2	Acute Lymphoblastic Leukemia	Inverse variance weighted	31.1473233660587	30	0.408190341657185			AKR1C1	Acute lymphocytic leukaemia	Inverse variance weighted	3.34791666803955	2	0.187503393696692
EFEMP2	Acute Lymphoblastic Leukemia	MR Egger	10.140513705444	21	0.977029244660296			PPP2R1A	Acute lymphocytic leukaemia	MR Egger	0.149262074912718	2	0.9280858520813
EFEMP2	Acute Lymphoblastic Leukemia	Inverse variance weighted	10.1666000029931	22	0.984730312950505			PPP2R1A	Acute lymphocytic leukaemia	Inverse variance weighted	1.11576776794045	3	0.773269109932964
EFTUD2	Acute Lymphoblastic Leukemia	MR Egger	35.6291566401495	35	0.438638004161263			JARID2	Acute lymphocytic leukaemia	MR Egger	1.29261866824717	2	0.523976033069777
EFTUD2	Acute Lymphoblastic Leukemia	Inverse variance weighted	35.774570989224	36	0.479229363573873			JARID2	Acute lymphocytic leukaemia	Inverse variance weighted	2.22096448614635	3	0.527830834638604
EGLN2	Acute Lymphoblastic Leukemia	MR Egger	28.7196300982248	35	0.764201226664924			ARFIP2	Acute lymphocytic leukaemia	MR Egger	3.66370845785742	8	0.886119646406939
EGLN2	Acute Lymphoblastic Leukemia	Inverse variance weighted	29.1748666816438	36	0.782800909545508			ARFIP2	Acute lymphocytic leukaemia	Inverse variance weighted	3.67386261078022	9	0.931538456975186
EHHADH	Acute Lymphoblastic Leukemia	MR Egger	5.1370430136352	11	0.924348294737875			NAT1	Acute lymphocytic leukaemia	MR Egger	1.2497812944159	2	0.535319964051129
EHHADH	Acute Lymphoblastic Leukemia	Inverse variance weighted	5.27365957164104	12	0.948208305206201			NAT1	Acute lymphocytic leukaemia	Inverse variance weighted	1.31920685600389	3	0.724577349978897
EHMT1	Acute Lymphoblastic Leukemia	MR Egger	4.81741133273376	8	0.776901333874673			PTPN9	Acute lymphocytic leukaemia	MR Egger	0.340113513224168	1	0.559763707265386
EHMT1	Acute Lymphoblastic Leukemia	Inverse variance weighted	4.8503871838195	9	0.847150431686636			PTPN9	Acute lymphocytic leukaemia	Inverse variance weighted	1.93927281295663	2	0.379220895300707
EIF2B4	Acute Lymphoblastic Leukemia	MR Egger	0.0221233413396266	1	0.881759450099379			BCAR3	Acute lymphocytic leukaemia	MR Egger	3.58667460683682	4	0.464822225929879
EIF2B4	Acute Lymphoblastic Leukemia	Inverse variance weighted	0.475646789187395	2	0.788341904242815			BCAR3	Acute lymphocytic leukaemia	Inverse variance weighted	4.03871443571834	5	0.543855599928829
EIF2D	Acute Lymphoblastic Leukemia	MR Egger	0.89659226549055	3	0.8262500950997			TRDMT1	Acute lymphocytic leukaemia	MR Egger	1.24704526640448	3	0.741744415285442
EIF2D	Acute Lymphoblastic Leukemia	Inverse variance weighted	2.80774554981172	4	0.590496434252454			TRDMT1	Acute lymphocytic leukaemia	Inverse variance weighted	1.30603699189152	4	0.860350437000591
EIF3F	Acute Lymphoblastic Leukemia	MR Egger	8.22824964956882	10	0.606552656082017			CRAT	Acute lymphocytic leukaemia	MR Egger	0.00044404378505759	1	0.983187944328852
EIF3F	Acute Lymphoblastic Leukemia	Inverse variance weighted	9.37476806806672	11	0.587341864069972			CRAT	Acute lymphocytic leukaemia	Inverse variance weighted	0.234097688909607	2	0.88954174292081
EIF3G	Acute Lymphoblastic Leukemia	MR Egger	5.62890231011074	12	0.933622194696116			INPP5B	Acute lymphocytic leukaemia	MR Egger	1.7153133833907	3	0.633534663737269
EIF3G	Acute Lymphoblastic Leukemia	Inverse variance weighted	8.28932386858238	13	0.824253803343213			INPP5B	Acute lymphocytic leukaemia	Inverse variance weighted	2.03337847782079	4	0.729619537104966
EIF4B	Acute Lymphoblastic Leukemia	MR Egger	4.67656698728416	8	0.791519260161021			GNAI3	Acute lymphocytic leukaemia	MR Egger	3.38102075158128	2	0.184425373723095
EIF4B	Acute Lymphoblastic Leukemia	Inverse variance weighted	4.95443680221391	9	0.838261884581428			GNAI3	Acute lymphocytic leukaemia	Inverse variance weighted	3.96228560898977	3	0.26556550668362
ELF2	Acute Lymphoblastic Leukemia	MR Egger	7.95112802850129	12	0.78893781102681			CSNK1G2	Acute lymphocytic leukaemia	MR Egger	2.79049433222935	1	0.0948249715724315
ELF2	Acute Lymphoblastic Leukemia	Inverse variance weighted	11.9987333091667	13	0.527747727325638			CSNK1G2	Acute lymphocytic leukaemia	Inverse variance weighted	3.49352734476714	2	0.174337243883365
ELL	Acute Lymphoblastic Leukemia	MR Egger	34.9662079921679	32	0.328978624443648			NAPB	Acute lymphocytic leukaemia	MR Egger	2.04834833114807	1	0.152371413023745
ELL	Acute Lymphoblastic Leukemia	Inverse variance weighted	39.7807495066434	33	0.193697148454186			NAPB	Acute lymphocytic leukaemia	Inverse variance weighted	2.29845698698106	2	0.316881150966637
ELMO2	Acute Lymphoblastic Leukemia	MR Egger	2.14845008295131	2	0.341562349417296			KLC1	Acute lymphocytic leukaemia	MR Egger	0.374604506312072	2	0.829193072282244
ELMO2	Acute Lymphoblastic Leukemia	Inverse variance weighted	2.20509366452987	3	0.530945775137335			KLC1	Acute lymphocytic leukaemia	Inverse variance weighted	1.20600333964603	3	0.751564825868198
ELMOD3	Acute Lymphoblastic Leukemia	MR Egger	0.000904367560177903	1	0.976009069479409			PANK3	Acute lymphocytic leukaemia	MR Egger	3.37180440200617	3	0.337773191905209
ELMOD3	Acute Lymphoblastic Leukemia	Inverse variance weighted	0.170954267584487	2	0.91807413568807			PANK3	Acute lymphocytic leukaemia	Inverse variance weighted	4.27913432612794	4	0.369545199926936
ELP5	Acute Lymphoblastic Leukemia	MR Egger	15.1393282315098	13	0.298735771372865			TST	Acute lymphocytic leukaemia	MR Egger	21.9508773782622	26	0.691381367765107
ELP5	Acute Lymphoblastic Leukemia	Inverse variance weighted	15.8290949567109	14	0.323922361418851			TST	Acute lymphocytic leukaemia	Inverse variance weighted	22.6090542538196	27	0.70582575088289
EMID1	Acute Lymphoblastic Leukemia	MR Egger	0.065822306817789	1	0.79751955047615			GDA	Acute lymphocytic leukaemia	MR Egger	10.8454703816454	6	0.0932713895343961
EMID1	Acute Lymphoblastic Leukemia	Inverse variance weighted	1.1544310257892	2	0.561459568912625			GDA	Acute lymphocytic leukaemia	Inverse variance weighted	13.4561253182068	7	0.061744650670509
ENDOU	Acute Lymphoblastic Leukemia	MR Egger	0.179443722925381	2	0.914185420108915			VPS4B	Acute lymphocytic leukaemia	MR Egger	3.76881863232262	2	0.151918768893436
ENDOU	Acute Lymphoblastic Leukemia	Inverse variance weighted	0.180592899012815	3	0.980659736515033			VPS4B	Acute lymphocytic leukaemia	Inverse variance weighted	4.07013049552867	3	0.25399020343606
ENKUR	Acute Lymphoblastic Leukemia	MR Egger	6.09737185479352	5	0.296859212413876			SULT1B1	Acute lymphocytic leukaemia	MR Egger	6.85997697506294	6	0.333990900671702
ENKUR	Acute Lymphoblastic Leukemia	Inverse variance weighted	6.18442057633861	6	0.402851648334007			SULT1B1	Acute lymphocytic leukaemia	Inverse variance weighted	7.25523837125929	7	0.402797227210205
ENO1	Acute Lymphoblastic Leukemia	MR Egger	9.22414355090422	10	0.510971999988988			PACSIN1	Acute lymphocytic leukaemia	MR Egger	4.84067424767735	7	0.679399230029341
ENO1	Acute Lymphoblastic Leukemia	Inverse variance weighted	9.43365316906057	11	0.581930176812064			PACSIN1	Acute lymphocytic leukaemia	Inverse variance weighted	5.96659788655875	8	0.650973565577194
ENOSF1	Acute Lymphoblastic Leukemia	MR Egger	28.6721480223869	26	0.326200262025909			FLII	Acute lymphocytic leukaemia	MR Egger	0.810050181147301	1	0.368105415039278
ENOSF1	Acute Lymphoblastic Leukemia	Inverse variance weighted	28.7233281094455	27	0.37444163287166			FLII	Acute lymphocytic leukaemia	Inverse variance weighted	1.27642927925621	2	0.528234671917057
ENPP1	Acute Lymphoblastic Leukemia	MR Egger	0.70835134091155	1	0.399991670633562			USP21	Acute lymphocytic leukaemia	MR Egger	3.79211530259505	3	0.284804586355633
ENPP1	Acute Lymphoblastic Leukemia	Inverse variance weighted	1.18820657416251	2	0.552057380966529			USP21	Acute lymphocytic leukaemia	Inverse variance weighted	3.87137072368472	4	0.42369372883384
ERCC3	Acute Lymphoblastic Leukemia	MR Egger	33.0198049441253	31	0.368626335534149			SCIN	Acute lymphocytic leukaemia	MR Egger	2.63912698883282	2	0.267251933470032
ERCC3	Acute Lymphoblastic Leukemia	Inverse variance weighted	34.1930299317197	32	0.362757555123916			SCIN	Acute lymphocytic leukaemia	Inverse variance weighted	3.79519838994406	3	0.284445132772394
ERICH1	Acute Lymphoblastic Leukemia	MR Egger	73.4904012967011	66	0.246247730957207			HOMER2	Acute lymphocytic leukaemia	MR Egger	8.20590543110369	10	0.608732157919559
ERICH1	Acute Lymphoblastic Leukemia	Inverse variance weighted	73.7069832820097	67	0.268193703490804			HOMER2	Acute lymphocytic leukaemia	Inverse variance weighted	8.25246646725273	11	0.69052563256841
ESYT2	Acute Lymphoblastic Leukemia	MR Egger	34.8711753005511	39	0.658669429045967			DECR1	Acute lymphocytic leukaemia	MR Egger	0.207528481660321	1	0.648711489964721
ESYT2	Acute Lymphoblastic Leukemia	Inverse variance weighted	34.933084486679	40	0.697394089720606			DECR1	Acute lymphocytic leukaemia	Inverse variance weighted	0.338982255189253	2	0.844094243593442
EXOSC10	Acute Lymphoblastic Leukemia	MR Egger	0.746774864484645	2	0.688398473407526			RPS6KA6	Acute lymphocytic leukaemia	MR Egger	1.83497122582874	2	0.399522333018356
EXOSC10	Acute Lymphoblastic Leukemia	Inverse variance weighted	0.749163038638095	3	0.861583806701849			RPS6KA6	Acute lymphocytic leukaemia	Inverse variance weighted	1.99813495581583	3	0.572793891612874
EXT1	Acute Lymphoblastic Leukemia	MR Egger	19.4608057229673	19	0.427654006187094			DOT1L	Acute lymphocytic leukaemia	MR Egger	6.5591877100893	1	0.01043439857942
EXT1	Acute Lymphoblastic Leukemia	Inverse variance weighted	21.7891364252528	20	0.352061446543291			DOT1L	Acute lymphocytic leukaemia	Inverse variance weighted	6.73676913965509	2	0.03444523629728
EZR	Acute Lymphoblastic Leukemia	MR Egger	4.47286328710267	13	0.985043473046019			SH3BGRL	Acute lymphocytic leukaemia	MR Egger	3.94809776645772	2	0.138893353237463
EZR	Acute Lymphoblastic Leukemia	Inverse variance weighted	4.75967889114727	14	0.988884055110043			SH3BGRL	Acute lymphocytic leukaemia	Inverse variance weighted	4.98950688319508	3	0.172567116328198
F2R	Acute Lymphoblastic Leukemia	MR Egger	12.3368192906282	19	0.870727846608162			ACLY	Acute lymphocytic leukaemia	MR Egger	0.080172612819741	1	0.777063627466861
F2R	Acute Lymphoblastic Leukemia	Inverse variance weighted	15.8289911105172	20	0.727175079823982			ACLY	Acute lymphocytic leukaemia	Inverse variance weighted	1.57117	2	0.455852337954763
FADS1	Acute Lymphoblastic Leukemia	MR Egger	24.966463169864	36	0.916614531235653			EIF1B	Acute lymphocytic leukaemia	MR Egger	0.141231697359687	1	0.707059595903782
FADS1	Acute Lymphoblastic Leukemia	Inverse variance weighted	25.446791960027	37	0.924461634586007			EIF1B	Acute lymphocytic leukaemia	Inverse variance weighted	1.34360567554448	2	0.510786881318377
FADS2	Acute Lymphoblastic Leukemia	MR Egger	40.8055384580268	52	0.868953581985507			PELI2	Acute lymphocytic leukaemia	MR Egger	0.273149130972227	1	0.601227088895246
FADS2	Acute Lymphoblastic Leukemia	Inverse variance weighted	41.3024761532834	53	0.878276547590652			PELI2	Acute lymphocytic leukaemia	Inverse variance weighted	3.46400317258367	2	0.176929914819795
FAM101B	Acute Lymphoblastic Leukemia	MR Egger	20.6094594704925	14	0.112067483954624			SH2D3C	Acute lymphocytic leukaemia	MR Egger	3.82835175472675	4	0.429734021891383
FAM101B	Acute Lymphoblastic Leukemia	Inverse variance weighted	23.8994029085982	15	0.0668216076947052			SH2D3C	Acute lymphocytic leukaemia	Inverse variance weighted	7.82411020387013	5	0.166199381674398
FAM103A1	Acute Lymphoblastic Leukemia	MR Egger	1.4926269061019	1	0.221809327448418			CDC42BPA	Acute lymphocytic leukaemia	MR Egger	7.51046789264654	4	0.11124858785348
FAM103A1	Acute Lymphoblastic Leukemia	Inverse variance weighted	1.77167528678062	2	0.412368610729013			CDC42BPA	Acute lymphocytic leukaemia	Inverse variance weighted	8.98872573100433	5	0.109514696485226
FAM104A	Acute Lymphoblastic Leukemia	MR Egger	17.2148132686111	23	0.798578729336181			L3MBTL2	Acute lymphocytic leukaemia	MR Egger	1.24701603781334	1	0.26412316407831
FAM104A	Acute Lymphoblastic Leukemia	Inverse variance weighted	19.4872	24	0.725530342615493			L3MBTL2	Acute lymphocytic leukaemia	Inverse variance weighted	1.31822515290776	2	0.517310204111508
FAM109A	Acute Lymphoblastic Leukemia	MR Egger	1.7180738719129	5	0.886614937677526			RGS19	Acute lymphocytic leukaemia	MR Egger	9.97080601268745	8	0.267080936996211
FAM109A	Acute Lymphoblastic Leukemia	Inverse variance weighted	1.83047514086869	6	0.93461076813348			RGS19	Acute lymphocytic leukaemia	Inverse variance weighted	15.7343315881199	9	0.0726410127028867
FAM111A	Acute Lymphoblastic Leukemia	MR Egger	1.18298469217809	3	0.757088111212398			AP1G2	Acute lymphocytic leukaemia	MR Egger	0.331457579278005	2	0.84727599305944
FAM111A	Acute Lymphoblastic Leukemia	Inverse variance weighted	2.52266437768356	4	0.640582035696656			AP1G2	Acute lymphocytic leukaemia	Inverse variance weighted	0.567609472141144	3	0.903805723647712
FAM115A	Acute Lymphoblastic Leukemia	MR Egger	1.18098118661298	1	0.277156335971875			DCP1B	Acute lymphocytic leukaemia	MR Egger	0.949362440574669	2	0.622083332406125
FAM115A	Acute Lymphoblastic Leukemia	Inverse variance weighted	1.45363622413389	2	0.483444812602387			DCP1B	Acute lymphocytic leukaemia	Inverse variance weighted	4.40051999684429	3	0.221337176246573
FAM117B	Acute Lymphoblastic Leukemia	MR Egger	85.2768420855723	65	0.0466405933710721			ZNF175	Acute lymphocytic leukaemia	MR Egger	5.06196669667905	3	0.167315468084496
FAM117B	Acute Lymphoblastic Leukemia	Inverse variance weighted	85.4063664641944	66	0.0543613054951169			ZNF175	Acute lymphocytic leukaemia	Inverse variance weighted	5.18095897206929	4	0.269228792567983
FAM118B	Acute Lymphoblastic Leukemia	MR Egger	41.4486032389466	41	0.451053814135006			UBQLN4	Acute lymphocytic leukaemia	MR Egger	0.0755159341256835	2	0.962945977332033
FAM118B	Acute Lymphoblastic Leukemia	Inverse variance weighted	41.5878232303788	42	0.488926784062398			UBQLN4	Acute lymphocytic leukaemia	Inverse variance weighted	3.08225325089307	3	0.379116386292526
FAM120AOS	Acute Lymphoblastic Leukemia	MR Egger	10.9945480021706	11	0.443720144506104			CIRBP	Acute lymphocytic leukaemia	MR Egger	0.0610751515953406	2	0.969923985715022
FAM120AOS	Acute Lymphoblastic Leukemia	Inverse variance weighted	12.2920112760693	12	0.422522021411456			CIRBP	Acute lymphocytic leukaemia	Inverse variance weighted	1.37290498719299	3	0.711898060406757
FAM134B	Acute Lymphoblastic Leukemia	MR Egger	5.61709235502873	14	0.975239852760119			PTGFRN	Acute lymphocytic leukaemia	MR Egger	17.2460853907136	14	0.243301011628254
FAM134B	Acute Lymphoblastic Leukemia	Inverse variance weighted	7.00692254459603	15	0.957457367967059			PTGFRN	Acute lymphocytic leukaemia	Inverse variance weighted	17.2529200077999	15	0.303971053743834
FAM134C	Acute Lymphoblastic Leukemia	MR Egger	4.13967617642268	4	0.387432643703095			NDC80	Acute lymphocytic leukaemia	MR Egger	0.766275029521902	4	0.942911325909022
FAM134C	Acute Lymphoblastic Leukemia	Inverse variance weighted	4.20599801303923	5	0.520154593246914			NDC80	Acute lymphocytic leukaemia	Inverse variance weighted	10.2279261841908	5	0.0690287230791361
FAM136A	Acute Lymphoblastic Leukemia	MR Egger	4.21386738769763	9	0.896780688869474			PLEKHA7	Acute lymphocytic leukaemia	MR Egger	7.25256304892526	5	0.202524264742835
FAM136A	Acute Lymphoblastic Leukemia	Inverse variance weighted	4.21410559330068	10	0.937171796096873			PLEKHA7	Acute lymphocytic leukaemia	Inverse variance weighted	8.25711568647685	6	0.219865078973362
FAM153C	Acute Lymphoblastic Leukemia	MR Egger	12.2620049714892	10	0.267904151474103			MPP7	Acute lymphocytic leukaemia	MR Egger	0.00262523736065402	1	0.959136612892594
FAM153C	Acute Lymphoblastic Leukemia	Inverse variance weighted	12.6199830444574	11	0.318886702189592			MPP7	Acute lymphocytic leukaemia	Inverse variance weighted	0.429753822780933	2	0.806640722351857
FAM157C	Acute Lymphoblastic Leukemia	MR Egger	28.5027044656719	19	0.0742203608540835			NISCH	Acute lymphocytic leukaemia	MR Egger	0.00486745820933379	1	0.9443789768886
FAM157C	Acute Lymphoblastic Leukemia	Inverse variance weighted	29.9992511589568	20	0.0698657955165349			NISCH	Acute lymphocytic leukaemia	Inverse variance weighted	1.73919983787687	2	0.419119197362389
FAM173B	Acute Lymphoblastic Leukemia	MR Egger	10.0474998486815	5	0.0739004924447032			FEV	Acute lymphocytic leukaemia	MR Egger	1.68261728876395	2	0.431145937379708
FAM173B	Acute Lymphoblastic Leukemia	Inverse variance weighted	11.335226044313	6	0.0785521939906377			FEV	Acute lymphocytic leukaemia	Inverse variance weighted	1.77062866154537	3	0.621347229013837
FAM177A1	Acute Lymphoblastic Leukemia	MR Egger	13.5063216055088	21	0.889857177476066			RBM3	Acute lymphocytic leukaemia	MR Egger	0.32884409464433	3	0.954515463442612
FAM177A1	Acute Lymphoblastic Leukemia	Inverse variance weighted	13.5351518044783	22	0.917153784384855			RBM3	Acute lymphocytic leukaemia	Inverse variance weighted	1.88081542831172	4	0.757668290023916
FAM177B	Acute Lymphoblastic Leukemia	MR Egger	31.1321048069783	21	0.071487315678563			BRDT	Acute lymphocytic leukaemia	MR Egger	0.000215126833044744	1	0.988297685051683
FAM177B	Acute Lymphoblastic Leukemia	Inverse variance weighted	33.8561934656701	22	0.0508026907655431			BRDT	Acute lymphocytic leukaemia	Inverse variance weighted	1.73054963657189	2	0.420935855859856
FAM19A1	Acute Lymphoblastic Leukemia	MR Egger	38.2713158928877	45	0.750734034033955			ITGB2	Acute lymphocytic leukaemia	MR Egger	5.85203647120658	2	0.0536100764232217
FAM19A1	Acute Lymphoblastic Leukemia	Inverse variance weighted	38.5774042069657	46	0.773175621462919			ITGB2	Acute lymphocytic leukaemia	Inverse variance weighted	6.0590905212611	3	0.108770468145118
FAM19A2	Acute Lymphoblastic Leukemia	MR Egger	38.9535758787277	45	0.724813497680289			CSDC2	Acute lymphocytic leukaemia	MR Egger	7.27406330456528	4	0.122094832470429
FAM19A2	Acute Lymphoblastic Leukemia	Inverse variance weighted	39.9127884909849	46	0.72395786268022			CSDC2	Acute lymphocytic leukaemia	Inverse variance weighted	8.14360272848467	5	0.148496962617965
FAM206A	Acute Lymphoblastic Leukemia	MR Egger	6.25263762527521	11	0.855986793113069			BACH2	Acute lymphocytic leukaemia	MR Egger	1.03779755668309	2	0.595175607490684
FAM206A	Acute Lymphoblastic Leukemia	Inverse variance weighted	6.25431295259731	12	0.902723239982886			BACH2	Acute lymphocytic leukaemia	Inverse variance weighted	2.81220841430376	3	0.421494135912821
FAM20B	Acute Lymphoblastic Leukemia	MR Egger	4.84188569149809	11	0.938581272462187			GRID2	Acute lymphocytic leukaemia	MR Egger	22.4555428996291	26	0.663533271671928
FAM20B	Acute Lymphoblastic Leukemia	Inverse variance weighted	6.3685692545318	12	0.896375193314612			GRID2	Acute lymphocytic leukaemia	Inverse variance weighted	23.0160086946618	27	0.684152091417639
FAM219B	Acute Lymphoblastic Leukemia	MR Egger	6.77524089074845	10	0.746479541701824			ILF3	Acute lymphocytic leukaemia	MR Egger	0.966552278121335	1	0.325541538542516
FAM219B	Acute Lymphoblastic Leukemia	Inverse variance weighted	6.77633465945018	11	0.816896311390652			ILF3	Acute lymphocytic leukaemia	Inverse variance weighted	1.0025320667527	2	0.605763257534545
FAM21C	Acute Lymphoblastic Leukemia	MR Egger	12.830609368902	17	0.747449773105789			ZNF774	Acute lymphocytic leukaemia	MR Egger	5.50051754305615	2	0.0639113206365832
FAM21C	Acute Lymphoblastic Leukemia	Inverse variance weighted	15.1852122078308	18	0.649212895961846			ZNF774	Acute lymphocytic leukaemia	Inverse variance weighted	6.15518429626287	3	0.104299484299262
FAM22E	Acute Lymphoblastic Leukemia	MR Egger	8.28644545560641	12	0.762364147967446			APBB2	Acute lymphocytic leukaemia	MR Egger	0.452690812209148	1	0.501059892683813
FAM22E	Acute Lymphoblastic Leukemia	Inverse variance weighted	8.53861224771146	13	0.806829252989688			APBB2	Acute lymphocytic leukaemia	Inverse variance weighted	0.475626503624943	2	0.788349900262832
FAM46C	Acute Lymphoblastic Leukemia	MR Egger	7.08004917372875	3	0.0693896296921677			ZNF334	Acute lymphocytic leukaemia	MR Egger	1.17339755457769	1	0.278704232741354
FAM46C	Acute Lymphoblastic Leukemia	Inverse variance weighted	7.08706535274381	4	0.131358133246827			ZNF334	Acute lymphocytic leukaemia	Inverse variance weighted	1.71170218109075	2	0.424921390563577
FAM63B	Acute Lymphoblastic Leukemia	MR Egger	10.0140998664196	18	0.93144518598367			ELMO1	Acute lymphocytic leukaemia	MR Egger	8.56403693303749	4	0.0729697610000819
FAM63B	Acute Lymphoblastic Leukemia	Inverse variance weighted	12.2280289893245	19	0.875648336065745			ELMO1	Acute lymphocytic leukaemia	Inverse variance weighted	11.0099543102613	5	0.0511829756513904
FAM65A	Acute Lymphoblastic Leukemia	MR Egger	0.22346935981716	4	0.994203753676811			PPP1R3B	Acute lymphocytic leukaemia	MR Egger	0.891234002099503	1	0.345143124023981
FAM65A	Acute Lymphoblastic Leukemia	Inverse variance weighted	0.317229611487234	5	0.997306425799037			PPP1R3B	Acute lymphocytic leukaemia	Inverse variance weighted	1.19637774126548	2	0.549806505612005
FAM65B	Acute Lymphoblastic Leukemia	MR Egger	18.8647162098337	22	0.653666812944013			TARBP2	Acute lymphocytic leukaemia	MR Egger	0.0103431937574204	1	0.918993616742019
FAM65B	Acute Lymphoblastic Leukemia	Inverse variance weighted	18.865781565185	23	0.708986835293626			TARBP2	Acute lymphocytic leukaemia	Inverse variance weighted	3.51383759670919	2	0.17257578626005
FAM81B	Acute Lymphoblastic Leukemia	MR Egger	0.140729993059136	1	0.707556376268775			HNRNPM	Acute lymphocytic leukaemia	MR Egger	5.9468986670593	1	0.0147432020755602
FAM81B	Acute Lymphoblastic Leukemia	Inverse variance weighted	0.606986768925957	2	0.738234772935115			HNRNPM	Acute lymphocytic leukaemia	Inverse variance weighted	5.94743713596832	2	0.0511128897500011
FAM86C1	Acute Lymphoblastic Leukemia	MR Egger	41.4358709168814	35	0.210348416511519			GPCPD1	Acute lymphocytic leukaemia	MR Egger	1.49940194660957	2	0.472507824071108
FAM86C1	Acute Lymphoblastic Leukemia	Inverse variance weighted	41.5475554047565	36	0.241762643125402			GPCPD1	Acute lymphocytic leukaemia	Inverse variance weighted	1.52100131706222	3	0.677431788669094
FAM86C2P	Acute Lymphoblastic Leukemia	MR Egger	0.0501549689841027	1	0.822793835323845			CCDC51	Acute lymphocytic leukaemia	MR Egger	1.35884500907812	1	0.243737751907793
FAM86C2P	Acute Lymphoblastic Leukemia	Inverse variance weighted	0.648192121813874	2	0.723180769642478			CCDC51	Acute lymphocytic leukaemia	Inverse variance weighted	1.64987834595726	2	0.438261649804937
FAM86FP	Acute Lymphoblastic Leukemia	MR Egger	1.97832388726473	7	0.961030333303727			NLRP4	Acute lymphocytic leukaemia	MR Egger	0.426450962000643	1	0.513735565455613
FAM86FP	Acute Lymphoblastic Leukemia	Inverse variance weighted	2.49738649950415	8	0.961852706047134			NLRP4	Acute lymphocytic leukaemia	Inverse variance weighted	3.88303852342346	2	0.143485791630603
FAM86HP	Acute Lymphoblastic Leukemia	MR Egger	9.54858992066399	14	0.794386476520056			SLC4A8	Acute lymphocytic leukaemia	MR Egger	0.0667625812157312	1	0.796110130912571
FAM86HP	Acute Lymphoblastic Leukemia	Inverse variance weighted	10.159400342281	15	0.809595151686963			SLC4A8	Acute lymphocytic leukaemia	Inverse variance weighted	3.0939107845171	2	0.212895170380843
FAM86JP	Acute Lymphoblastic Leukemia	MR Egger	4.52535818557477	7	0.717661607657121			TPPP2	Acute lymphocytic leukaemia	MR Egger	3.25433992564165	2	0.19648484745767
FAM86JP	Acute Lymphoblastic Leukemia	Inverse variance weighted	5.1690786844053	8	0.739361394796511			TPPP2	Acute lymphocytic leukaemia	Inverse variance weighted	3.26103875961728	3	0.353102240074959
FAM98C	Acute Lymphoblastic Leukemia	MR Egger	0.000381026047528011	1	0.984426371326847			ARHGAP30	Acute lymphocytic leukaemia	MR Egger	4.26265027947615	1	0.0389590946998941
FAM98C	Acute Lymphoblastic Leukemia	Inverse variance weighted	0.00059315476165941	2	0.999703466593894			ARHGAP30	Acute lymphocytic leukaemia	Inverse variance weighted	5.18854313128426	2	0.0747002705042221
FANCL	Acute Lymphoblastic Leukemia	MR Egger	0.269401527710446	1	0.603733515300644			ZNF415	Acute lymphocytic leukaemia	MR Egger	0.0493363358264442	1	0.824222148691439
FANCL	Acute Lymphoblastic Leukemia	Inverse variance weighted	0.67059149679558	2	0.715126557540838			ZNF415	Acute lymphocytic leukaemia	Inverse variance weighted	1.44808818666145	2	0.484787759389062
FARP1	Acute Lymphoblastic Leukemia	MR Egger	8.97516118312527	12	0.705050526777948			ACYP2	Acute lymphocytic leukaemia	MR Egger	0.922867716883996	2	0.630379122756283
FARP1	Acute Lymphoblastic Leukemia	Inverse variance weighted	10.3579362305405	13	0.664435337027583			ACYP2	Acute lymphocytic leukaemia	Inverse variance weighted	3.80194265080233	3	0.283660248733551
FARSA	Acute Lymphoblastic Leukemia	MR Egger	3.29368989449092	6	0.771184737940556			EHBP1	Acute lymphocytic leukaemia	MR Egger	2.06844180116762	1	0.150375090402323
FARSA	Acute Lymphoblastic Leukemia	Inverse variance weighted	7.25528038615115	7	0.402793016116955			EHBP1	Acute lymphocytic leukaemia	Inverse variance weighted	4.06188546592752	2	0.131211765166981
FASN	Acute Lymphoblastic Leukemia	MR Egger	16.2006859163025	20	0.704098552187655			RNPC3	Acute lymphocytic leukaemia	MR Egger	0.0566858326368614	2	0.972054976128237
FASN	Acute Lymphoblastic Leukemia	Inverse variance weighted	16.3133576237808	21	0.751794278566254			RNPC3	Acute lymphocytic leukaemia	Inverse variance weighted	3.13335484242233	3	0.371517967618717
FASTKD3	Acute Lymphoblastic Leukemia	MR Egger	2.68976432853521	5	0.747683487432482			GEM	Acute lymphocytic leukaemia	MR Egger	15.4093246846405	13	0.282500786661476
FASTKD3	Acute Lymphoblastic Leukemia	Inverse variance weighted	2.97855241165251	6	0.81153388127926			GEM	Acute lymphocytic leukaemia	Inverse variance weighted	16.0830214327245	14	0.308330584692838
FAT2	Acute Lymphoblastic Leukemia	MR Egger	2.41090105356394	3	0.491608621006413			SLC14A2	Acute lymphocytic leukaemia	MR Egger	2.72212165730105	3	0.436481031408393
FAT2	Acute Lymphoblastic Leukemia	Inverse variance weighted	2.4145277732422	4	0.660003462031103			SLC14A2	Acute lymphocytic leukaemia	Inverse variance weighted	3.80926154006187	4	0.432434465328408
FBP1	Acute Lymphoblastic Leukemia	MR Egger	11.1884190112988	17	0.846603005280793			GRAP	Acute lymphocytic leukaemia	MR Egger	9.91296222309386	5	0.0777393230629976
FBP1	Acute Lymphoblastic Leukemia	Inverse variance weighted	11.2313125428487	18	0.884284125622874			GRAP	Acute lymphocytic leukaemia	Inverse variance weighted	10.2317594808056	6	0.115225328350187
FBXL5	Acute Lymphoblastic Leukemia	MR Egger	16.0979857495862	16	0.446143258876345			SLC5A5	Acute lymphocytic leukaemia	MR Egger	0.932804427618818	1	0.334135255058837
FBXL5	Acute Lymphoblastic Leukemia	Inverse variance weighted	16.1661941916585	17	0.512085264619407			SLC5A5	Acute lymphocytic leukaemia	Inverse variance weighted	1.49599070423161	2	0.473314431115291
FCHO2	Acute Lymphoblastic Leukemia	MR Egger	45.5334798850842	52	0.724524067858575			RGS3	Acute lymphocytic leukaemia	MR Egger	5.54965691045521	3	0.13569856779374
FCHO2	Acute Lymphoblastic Leukemia	Inverse variance weighted	46.7581747764283	53	0.714430318290205			RGS3	Acute lymphocytic leukaemia	Inverse variance weighted	5.56212100945384	4	0.234322717852342
FCRL3	Acute Lymphoblastic Leukemia	MR Egger	63.8483860213627	74	0.794036366364339			TESC	Acute lymphocytic leukaemia	MR Egger	5.20466367801439	6	0.517844337759386
FCRL3	Acute Lymphoblastic Leukemia	Inverse variance weighted	64.2206861095496	75	0.808143634776611			TESC	Acute lymphocytic leukaemia	Inverse variance weighted	6.1547462261059	7	0.521801274726351
FDFT1	Acute Lymphoblastic Leukemia	MR Egger	116.366282365609	110	0.320623232116465			STX10	Acute lymphocytic leukaemia	MR Egger	0.27458208099679	1	0.600274504087091
FDFT1	Acute Lymphoblastic Leukemia	Inverse variance weighted	116.560835697013	111	0.340264338381159			STX10	Acute lymphocytic leukaemia	Inverse variance weighted	0.401799067223699	2	0.817994608389617
FER	Acute Lymphoblastic Leukemia	MR Egger	0.266029907359302	1	0.606007463967994			SNX17	Acute lymphocytic leukaemia	MR Egger	3.45684771470267	2	0.177564055812352
FER	Acute Lymphoblastic Leukemia	Inverse variance weighted	0.39725898959127	2	0.81985359709208			SNX17	Acute lymphocytic leukaemia	Inverse variance weighted	3.46361713654571	3	0.325511603587927
FES	Acute Lymphoblastic Leukemia	MR Egger	36.3165409252747	42	0.717981105979662			ARHGEF2	Acute lymphocytic leukaemia	MR Egger	0.000391547060770637	1	0.984212851097509
FES	Acute Lymphoblastic Leukemia	Inverse variance weighted	36.3893674433066	43	0.751784272441593			ARHGEF2	Acute lymphocytic leukaemia	Inverse variance weighted	0.436188082304641	2	0.804049824339041
FEZ2	Acute Lymphoblastic Leukemia	MR Egger	86.7049889155881	59	0.0109099387021273			POLM	Acute lymphocytic leukaemia	MR Egger	0.396429404369006	1	0.528939046342677
FEZ2	Acute Lymphoblastic Leukemia	Inverse variance weighted	86.705552699307	60	0.0136498097971463			POLM	Acute lymphocytic leukaemia	Inverse variance weighted	0.669175710235744	2	0.71563297004707
FGFR2	Acute Lymphoblastic Leukemia	MR Egger	23.2569432354457	29	0.764655039333008			CASS4	Acute lymphocytic leukaemia	MR Egger	2.79481151690742	3	0.424354746121771
FGFR2	Acute Lymphoblastic Leukemia	Inverse variance weighted	23.2746854818451	30	0.803801177098987			CASS4	Acute lymphocytic leukaemia	Inverse variance weighted	4.89644789180294	4	0.298088562896379
FGGY	Acute Lymphoblastic Leukemia	MR Egger	31.7247179333492	28	0.285857410599224			ECI2	Acute lymphocytic leukaemia	MR Egger	1.78069553841748	6	0.93872301005687
FGGY	Acute Lymphoblastic Leukemia	Inverse variance weighted	31.7491116116368	29	0.330993029945942			ECI2	Acute lymphocytic leukaemia	Inverse variance weighted	2.57841337051926	7	0.921077635698686
FHL2	Acute Lymphoblastic Leukemia	MR Egger	9.67076639713034	11	0.560222365012943			NEDD9	Acute lymphocytic leukaemia	MR Egger	0.000843165744180458	1	0.976834828943065
FHL2	Acute Lymphoblastic Leukemia	Inverse variance weighted	9.74292828696839	12	0.638501926918784			NEDD9	Acute lymphocytic leukaemia	Inverse variance weighted	1.64147909506055	2	0.440106054776733
FIGNL1	Acute Lymphoblastic Leukemia	MR Egger	38.3866837752134	44	0.710204245016437			NIPAL4	Acute lymphocytic leukaemia	MR Egger	9.1835612478661	3	0.0269473187957535
FIGNL1	Acute Lymphoblastic Leukemia	Inverse variance weighted	40.4497679606307	45	0.664900259065679			NIPAL4	Acute lymphocytic leukaemia	Inverse variance weighted	10.2702454206479	4	0.0361133516334873
FLJ20373	Acute Lymphoblastic Leukemia	MR Egger	5.9843288794961	9	0.741485697969061			DDX6	Acute lymphocytic leukaemia	MR Egger	0.876865545895911	3	0.831006788787581
FLJ20373	Acute Lymphoblastic Leukemia	Inverse variance weighted	6.0073012324617	10	0.814649453757901			DDX6	Acute lymphocytic leukaemia	Inverse variance weighted	3.58371436629747	4	0.465264065527549
FLT3	Acute Lymphoblastic Leukemia	MR Egger	0.926654289654151	2	0.629186763640542			RDH16	Acute lymphocytic leukaemia	MR Egger	6.3737917747338	2	0.0412998716252723
FLT3	Acute Lymphoblastic Leukemia	Inverse variance weighted	1.07092474013476	3	0.784097192953679			RDH16	Acute lymphocytic leukaemia	Inverse variance weighted	6.92378292713445	3	0.0743671564401481
FLVCR2	Acute Lymphoblastic Leukemia	MR Egger	27.7140438802724	28	0.479675866198289			MICALL2	Acute lymphocytic leukaemia	MR Egger	8.22666845440137	6	0.221962947051368
FLVCR2	Acute Lymphoblastic Leukemia	Inverse variance weighted	27.7306192217112	29	0.532348425838132			MICALL2	Acute lymphocytic leukaemia	Inverse variance weighted	8.78754936213554	7	0.268271220824216
FMO4	Acute Lymphoblastic Leukemia	MR Egger	25.1877556010579	18	0.119831194601264			SYTL1	Acute lymphocytic leukaemia	MR Egger	2.16655680926218	2	0.33848401708391
FMO4	Acute Lymphoblastic Leukemia	Inverse variance weighted	25.9023257134538	19	0.132933714589995			SYTL1	Acute lymphocytic leukaemia	Inverse variance weighted	3.98806771198662	3	0.262755487521069
FN1	Acute Lymphoblastic Leukemia	MR Egger	7.93627473227535	10	0.635061572104988			PAXIP1	Acute lymphocytic leukaemia	MR Egger	3.98466198873542	4	0.408085603569864
FN1	Acute Lymphoblastic Leukemia	Inverse variance weighted	8.55215310596484	11	0.663154055451899			PAXIP1	Acute lymphocytic leukaemia	Inverse variance weighted	4.31987580786099	5	0.50433876256431
FNBP1P1	Acute Lymphoblastic Leukemia	MR Egger	21.9582650097627	15	0.108902924373505			DGKB	Acute lymphocytic leukaemia	MR Egger	0.570489686894812	5	0.989314484570983
FNBP1P1	Acute Lymphoblastic Leukemia	Inverse variance weighted	21.9683765394226	16	0.144215549940779			DGKB	Acute lymphocytic leukaemia	Inverse variance weighted	0.622057520778859	6	0.99602128147167
FNDC3A	Acute Lymphoblastic Leukemia	MR Egger	5.0070305711915	6	0.542911707718405			KRT17	Acute lymphocytic leukaemia	MR Egger	4.20967809313115	2	0.121865287327176
FNDC3A	Acute Lymphoblastic Leukemia	Inverse variance weighted	5.14859123730039	7	0.641835502699821			KRT17	Acute lymphocytic leukaemia	Inverse variance weighted	4.88115916324938	3	0.18070897442661
FNDC3B	Acute Lymphoblastic Leukemia	MR Egger	7.60872180098822	12	0.81491165282305			AXIN2	Acute lymphocytic leukaemia	MR Egger	6.18487350489831	4	0.18576066580679
FNDC3B	Acute Lymphoblastic Leukemia	Inverse variance weighted	9.99613663909642	13	0.694250258388555			AXIN2	Acute lymphocytic leukaemia	Inverse variance weighted	6.25229699224273	5	0.282437659361825
FOLR3	Acute Lymphoblastic Leukemia	MR Egger	88.6389767788794	80	0.238199488973281			ENOX1	Acute lymphocytic leukaemia	MR Egger	8.87742995877825	9	0.44866466574802
FOLR3	Acute Lymphoblastic Leukemia	Inverse variance weighted	88.6969052157044	81	0.261549726999434			ENOX1	Acute lymphocytic leukaemia	Inverse variance weighted	9.01577790238124	10	0.530606852457908
FOXO6	Acute Lymphoblastic Leukemia	MR Egger	0.0695267701606383	1	0.792027051917964			HERC5	Acute lymphocytic leukaemia	MR Egger	7.38946864985386	7	0.389484710618567
FOXO6	Acute Lymphoblastic Leukemia	Inverse variance weighted	0.126518977457351	2	0.938699860049712			HERC5	Acute lymphocytic leukaemia	Inverse variance weighted	9.29026163715252	8	0.318404719418295
FPGT	Acute Lymphoblastic Leukemia	MR Egger	22.502381988345	26	0.66092140442946			RLBP1	Acute lymphocytic leukaemia	MR Egger	0.459440003061452	1	0.497885804809978
FPGT	Acute Lymphoblastic Leukemia	Inverse variance weighted	22.5177978716965	27	0.710625279905452			RLBP1	Acute lymphocytic leukaemia	Inverse variance weighted	0.675331588780416	2	0.713433681598412
FTSJD1	Acute Lymphoblastic Leukemia	MR Egger	24.2147029942263	33	0.866839937069508			POLR1C	Acute lymphocytic leukaemia	MR Egger	12.8602715691987	7	0.075586922455532
FTSJD1	Acute Lymphoblastic Leukemia	Inverse variance weighted	24.8734914217065	34	0.873275158527606			POLR1C	Acute lymphocytic leukaemia	Inverse variance weighted	13.3867361746235	8	0.0992179185635027
FUCA2	Acute Lymphoblastic Leukemia	MR Egger	2.00078750371479	5	0.849036059129629			ALDH3B1	Acute lymphocytic leukaemia	MR Egger	0.486308408816525	1	0.485578676385243
FUCA2	Acute Lymphoblastic Leukemia	Inverse variance weighted	4.1749943062372	6	0.65300829104703			ALDH3B1	Acute lymphocytic leukaemia	Inverse variance weighted	1.87551451758062	2	0.391504895644528
FURIN	Acute Lymphoblastic Leukemia	MR Egger	6.21964926729522	10	0.796483948620649			RAB18	Acute lymphocytic leukaemia	MR Egger	0.555190863301815	2	0.757603261823034
FURIN	Acute Lymphoblastic Leukemia	Inverse variance weighted	8.32520820328731	11	0.683909884759306			RAB18	Acute lymphocytic leukaemia	Inverse variance weighted	3.96984010100109	3	0.264739324864644
FUT10	Acute Lymphoblastic Leukemia	MR Egger	73.3683871705174	60	0.115109523352302			PPARA	Acute lymphocytic leukaemia	MR Egger	0.515250452948863	1	0.472874765850551
FUT10	Acute Lymphoblastic Leukemia	Inverse variance weighted	73.7179887231659	61	0.127279585817568			PPARA	Acute lymphocytic leukaemia	Inverse variance weighted	1.39460592840259	2	0.497926419838902
FUT7	Acute Lymphoblastic Leukemia	MR Egger	27.3434061326772	34	0.783637661187819			GCK	Acute lymphocytic leukaemia	MR Egger	7.42696701488264	6	0.283158328535247
FUT7	Acute Lymphoblastic Leukemia	Inverse variance weighted	27.682590304865	35	0.805931929648874			GCK	Acute lymphocytic leukaemia	Inverse variance weighted	8.98846213172027	7	0.25348548094506
FZD1	Acute Lymphoblastic Leukemia	MR Egger	23.4920581235547	23	0.432364129466196			CSRP2	Acute lymphocytic leukaemia	MR Egger	1.0310739478569	3	0.793733566975355
FZD1	Acute Lymphoblastic Leukemia	Inverse variance weighted	25.308696132725	24	0.389144218755196			CSRP2	Acute lymphocytic leukaemia	Inverse variance weighted	3.09207918467609	4	0.542536159939069
FZD2	Acute Lymphoblastic Leukemia	MR Egger	23.5685778602762	22	0.370242787416568			STAU2	Acute lymphocytic leukaemia	MR Egger	4.79243738149356	4	0.309265227816156
FZD2	Acute Lymphoblastic Leukemia	Inverse variance weighted	25.4589557237005	23	0.327063901458998			STAU2	Acute lymphocytic leukaemia	Inverse variance weighted	4.88351411114721	5	0.43026120730646
GALM	Acute Lymphoblastic Leukemia	MR Egger	40.509480637225	20	0.00430430593329093			KRT20	Acute lymphocytic leukaemia	MR Egger	4.60963644517412	5	0.465349787039386
GALM	Acute Lymphoblastic Leukemia	Inverse variance weighted	42.632443773425	21	0.00350086815044206			KRT20	Acute lymphocytic leukaemia	Inverse variance weighted	8.18191187059919	6	0.225076679559694
GAPT	Acute Lymphoblastic Leukemia	MR Egger	61.8570399790496	74	0.842076004627059			LIN7C	Acute lymphocytic leukaemia	MR Egger	7.52070062666303	5	0.184704237434911
GAPT	Acute Lymphoblastic Leukemia	Inverse variance weighted	62.0787340895015	75	0.857068610285151			LIN7C	Acute lymphocytic leukaemia	Inverse variance weighted	7.52378486091503	6	0.275107374544879
GCC1	Acute Lymphoblastic Leukemia	MR Egger	17.0049781059001	13	0.199076604164641			CUL9	Acute lymphocytic leukaemia	MR Egger	4.95716453206144	4	0.291720989164451
GCC1	Acute Lymphoblastic Leukemia	Inverse variance weighted	19.0912366997824	14	0.161492265226749			CUL9	Acute lymphocytic leukaemia	Inverse variance weighted	5.62681028636891	5	0.344240926632145
GDF15	Acute Lymphoblastic Leukemia	MR Egger	1.48330958943261	6	0.960595526499343			NPLOC4	Acute lymphocytic leukaemia	MR Egger	0.250518179075408	1	0.616710447780838
GDF15	Acute Lymphoblastic Leukemia	Inverse variance weighted	1.58382240198779	7	0.979265049311397			NPLOC4	Acute lymphocytic leukaemia	Inverse variance weighted	0.39080789118271	2	0.822502344746249
GDPD5	Acute Lymphoblastic Leukemia	MR Egger	35.3664	43	0.789457776745751			LCN10	Acute lymphocytic leukaemia	MR Egger	8.34229113482268	8	0.400768168519525
GDPD5	Acute Lymphoblastic Leukemia	Inverse variance weighted	35.5296214246674	44	0.814890750406782			LCN10	Acute lymphocytic leukaemia	Inverse variance weighted	8.76786705814857	9	0.458972311343836
GFI1	Acute Lymphoblastic Leukemia	MR Egger	0.659552618739319	4	0.956221622857241			RPS10	Acute lymphocytic leukaemia	MR Egger	12.8843087820121	7	0.0749778611737153
GFI1	Acute Lymphoblastic Leukemia	Inverse variance weighted	0.703046492745413	5	0.982801058150359			RPS10	Acute lymphocytic leukaemia	Inverse variance weighted	13.3848031139392	8	0.0992777902309467
GGACT	Acute Lymphoblastic Leukemia	MR Egger	21.1171	26	0.735894789139347			TP53I11	Acute lymphocytic leukaemia	MR Egger	23.9112528723474	13	0.0319562727973105
GGACT	Acute Lymphoblastic Leukemia	Inverse variance weighted	22.3616419800136	27	0.718781797695212			TP53I11	Acute lymphocytic leukaemia	Inverse variance weighted	23.9112894369777	14	0.0469651464695022
GGNBP2	Acute Lymphoblastic Leukemia	MR Egger	27.5906821858867	22	0.189645747775521			FRS2	Acute lymphocytic leukaemia	MR Egger	7.00134702306389	3	0.0718548506815443
GGNBP2	Acute Lymphoblastic Leukemia	Inverse variance weighted	28.691394684549	23	0.190760174131481			FRS2	Acute lymphocytic leukaemia	Inverse variance weighted	7.72327703503554	4	0.102257310231999
GHITM	Acute Lymphoblastic Leukemia	MR Egger	15.1577475089271	15	0.4401151918498			CBX7	Acute lymphocytic leukaemia	MR Egger	0.13421360900386	1	0.714102614298004
GHITM	Acute Lymphoblastic Leukemia	Inverse variance weighted	21.9892148329021	16	0.143540113957238			CBX7	Acute lymphocytic leukaemia	Inverse variance weighted	0.2902265606458	2	0.864924308656022
GIGYF1	Acute Lymphoblastic Leukemia	MR Egger	20.7080052991201	17	0.239624315673168			BECN1	Acute lymphocytic leukaemia	MR Egger	6.41329136323349	4	0.170336378194952
GIGYF1	Acute Lymphoblastic Leukemia	Inverse variance weighted	21.6296498782722	18	0.248843254420852			BECN1	Acute lymphocytic leukaemia	Inverse variance weighted	7.15134864511214	5	0.209625475251444
GINM1	Acute Lymphoblastic Leukemia	MR Egger	30.8202108255564	32	0.526157393156504			PPP1R8	Acute lymphocytic leukaemia	MR Egger	2.55286391360164	3	0.465813096427158
GINM1	Acute Lymphoblastic Leukemia	Inverse variance weighted	30.9309011399054	33	0.570482820645811			PPP1R8	Acute lymphocytic leukaemia	Inverse variance weighted	3.59822288563073	4	0.463101318746734
GINS3	Acute Lymphoblastic Leukemia	MR Egger	0.680790585026409	2	0.711489020884827			KCNA10	Acute lymphocytic leukaemia	MR Egger	6.92508718604061	7	0.43672127156948
GINS3	Acute Lymphoblastic Leukemia	Inverse variance weighted	1.77485298120635	3	0.620422437898502			KCNA10	Acute lymphocytic leukaemia	Inverse variance weighted	11.1438301593955	8	0.193682018745032
GIT1	Acute Lymphoblastic Leukemia	MR Egger	35.8792523797691	36	0.474307802620928			TSG101	Acute lymphocytic leukaemia	MR Egger	1.30784841758054	2	0.520001174481852
GIT1	Acute Lymphoblastic Leukemia	Inverse variance weighted	37.5407940514542	37	0.444304078072483			TSG101	Acute lymphocytic leukaemia	Inverse variance weighted	2.5488002664406	3	0.466536300474321
GIT2	Acute Lymphoblastic Leukemia	MR Egger	1.10906339433358	4	0.89283154414871			SLC6A14	Acute lymphocytic leukaemia	MR Egger	4.82218667943243	3	0.185290250178394
GIT2	Acute Lymphoblastic Leukemia	Inverse variance weighted	2.53258047762629	5	0.771580591923064			SLC6A14	Acute lymphocytic leukaemia	Inverse variance weighted	4.82755206243905	4	0.305453716691341
GLB1L2	Acute Lymphoblastic Leukemia	MR Egger	3.21819844078949	6	0.781004349351929			PSD	Acute lymphocytic leukaemia	MR Egger	7.77730089816505	8	0.455521018428046
GLB1L2	Acute Lymphoblastic Leukemia	Inverse variance weighted	5.76923436706903	7	0.566938333034118			PSD	Acute lymphocytic leukaemia	Inverse variance weighted	8.96098124034832	9	0.440883753589445
GLIS3	Acute Lymphoblastic Leukemia	MR Egger	7.02545687944725	8	0.533888569306257			SLC6A16	Acute lymphocytic leukaemia	MR Egger	0.6665442999013	1	0.414259022001188
GLIS3	Acute Lymphoblastic Leukemia	Inverse variance weighted	7.02653789449815	9	0.634356310692502			SLC6A16	Acute lymphocytic leukaemia	Inverse variance weighted	0.668126381187907	2	0.716008535792997
GLRX2	Acute Lymphoblastic Leukemia	MR Egger	0.916364599101491	2	0.632432173596752			RFK	Acute lymphocytic leukaemia	MR Egger	0.637074551230497	3	0.887894983800483
GLRX2	Acute Lymphoblastic Leukemia	Inverse variance weighted	2.03203002634365	3	0.565785438405407			RFK	Acute lymphocytic leukaemia	Inverse variance weighted	4.43516113316568	4	0.350305073252805
GLT1D1	Acute Lymphoblastic Leukemia	MR Egger	6.9222696082177	8	0.545042015248451			EDC4	Acute lymphocytic leukaemia	MR Egger	25.2616451852122	12	0.0136305384497081
GLT1D1	Acute Lymphoblastic Leukemia	Inverse variance weighted	8.91786979698358	9	0.444889876795307			EDC4	Acute lymphocytic leukaemia	Inverse variance weighted	31.8462561108792	13	0.00253156158609448
GLT25D1	Acute Lymphoblastic Leukemia	MR Egger	31.1406895127173	23	0.119375757437215			PRKG1	Acute lymphocytic leukaemia	MR Egger	1.62367833096918	1	0.202579658677499
GLT25D1	Acute Lymphoblastic Leukemia	Inverse variance weighted	42.6132497070456	24	0.0110072004073421			PRKG1	Acute lymphocytic leukaemia	Inverse variance weighted	2.51668897422641	2	0.284124008319171
GLTP	Acute Lymphoblastic Leukemia	MR Egger	14.6636674578946	15	0.475904075313617			CCS	Acute lymphocytic leukaemia	MR Egger	4.97957790156346	4	0.289399356326914
GLTP	Acute Lymphoblastic Leukemia	Inverse variance weighted	15.6896194395037	16	0.474825019733446			CCS	Acute lymphocytic leukaemia	Inverse variance weighted	5.25636932233034	5	0.385400357335489
GLYATL1P1	Acute Lymphoblastic Leukemia	MR Egger	2.37884120216599	2	0.30439758061151			ANP32A	Acute lymphocytic leukaemia	MR Egger	3.07101277455298	1	0.0796998050025752
GLYATL1P1	Acute Lymphoblastic Leukemia	Inverse variance weighted	2.44250385829699	3	0.485771586742541			ANP32A	Acute lymphocytic leukaemia	Inverse variance weighted	5.70302828044646	2	0.0577568027360042
GM2A	Acute Lymphoblastic Leukemia	MR Egger	46.3993311013084	58	0.863376009953448			FXR1	Acute lymphocytic leukaemia	MR Egger	3.33567858185394	4	0.503299227297938
GM2A	Acute Lymphoblastic Leukemia	Inverse variance weighted	46.9075474910101	59	0.872302975802311			FXR1	Acute lymphocytic leukaemia	Inverse variance weighted	3.76017409360929	5	0.584435178718356
GMIP	Acute Lymphoblastic Leukemia	MR Egger	5.27513421454497	7	0.626426621211041			UNC45A	Acute lymphocytic leukaemia	MR Egger	1.94743035354067	2	0.377677290523493
GMIP	Acute Lymphoblastic Leukemia	Inverse variance weighted	5.63297364531732	8	0.688267285278601			UNC45A	Acute lymphocytic leukaemia	Inverse variance weighted	3.58458247638241	3	0.309956609136281
GMNN	Acute Lymphoblastic Leukemia	MR Egger	2.43274618728119	2	0.296302883238815			BTC	Acute lymphocytic leukaemia	MR Egger	1.95180438728573	1	0.162392543439238
GMNN	Acute Lymphoblastic Leukemia	Inverse variance weighted	2.59985108091009	3	0.457515654916216			BTC	Acute lymphocytic leukaemia	Inverse variance weighted	1.95673563435788	2	0.375924175369875
GNG2	Acute Lymphoblastic Leukemia	MR Egger	3.15194713134645	5	0.676573224183684			S100A6	Acute lymphocytic leukaemia	MR Egger	9.57187704632936	7	0.214160246784646
GNG2	Acute Lymphoblastic Leukemia	Inverse variance weighted	3.2116153103279	6	0.781856548265341			S100A6	Acute lymphocytic leukaemia	Inverse variance weighted	9.71745253966538	8	0.285419713401712
GNGT2	Acute Lymphoblastic Leukemia	MR Egger	27.8980107654367	29	0.523371171540434			SECTM1	Acute lymphocytic leukaemia	MR Egger	6.20353529374383	7	0.516194982246888
GNGT2	Acute Lymphoblastic Leukemia	Inverse variance weighted	27.9027268292466	30	0.575591517652552			SECTM1	Acute lymphocytic leukaemia	Inverse variance weighted	6.25759948972375	8	0.618401378571132
GNPTG	Acute Lymphoblastic Leukemia	MR Egger	7.81747341593205	13	0.855284785282473			RSPO3	Acute lymphocytic leukaemia	MR Egger	0.999881332699224	4	0.909813982874155
GNPTG	Acute Lymphoblastic Leukemia	Inverse variance weighted	7.87571013952392	14	0.895700146680063			RSPO3	Acute lymphocytic leukaemia	Inverse variance weighted	2.02390814170901	5	0.845827098275931
GOLGA6L5	Acute Lymphoblastic Leukemia	MR Egger	12.6984946582396	14	0.550389757174061			REG1A	Acute lymphocytic leukaemia	MR Egger	12.1043228904314	10	0.278135247857625
GOLGA6L5	Acute Lymphoblastic Leukemia	Inverse variance weighted	12.7776151370961	15	0.619470151499591			REG1A	Acute lymphocytic leukaemia	Inverse variance weighted	13.1577305646722	11	0.283141394987578
GOLGA7B	Acute Lymphoblastic Leukemia	MR Egger	0.299407086246994	2	0.860963177049451			BCL2L2	Acute lymphocytic leukaemia	MR Egger	5.41501694902783	3	0.143810829025219
GOLGA7B	Acute Lymphoblastic Leukemia	Inverse variance weighted	3.26915711824899	3	0.351958520686374			BCL2L2	Acute lymphocytic leukaemia	Inverse variance weighted	5.93708202731165	4	0.2038965565744
GOLGB1	Acute Lymphoblastic Leukemia	MR Egger	30.9842485251929	34	0.616215357127528			SOST	Acute lymphocytic leukaemia	MR Egger	6.92640410375396	5	0.226171524939132
GOLGB1	Acute Lymphoblastic Leukemia	Inverse variance weighted	30.985886070112	35	0.662348500681319			SOST	Acute lymphocytic leukaemia	Inverse variance weighted	8.98192231377778	6	0.174597302802789
GOLM1	Acute Lymphoblastic Leukemia	MR Egger	31.3336329690586	32	0.500112384905657			FAM3D	Acute lymphocytic leukaemia	MR Egger	21.356731301244	15	0.125813594383867
GOLM1	Acute Lymphoblastic Leukemia	Inverse variance weighted	31.6562956872717	33	0.533965120700068			FAM3D	Acute lymphocytic leukaemia	Inverse variance weighted	22.6991656073715	16	0.122016224378442
GPATCH1	Acute Lymphoblastic Leukemia	MR Egger	14.1895500235479	23	0.921314418491374			SNAP25	Acute lymphocytic leukaemia	MR Egger	7.71944753913008	8	0.461344044973485
GPATCH1	Acute Lymphoblastic Leukemia	Inverse variance weighted	16.5657513674531	24	0.866582415754435			SNAP25	Acute lymphocytic leukaemia	Inverse variance weighted	7.73050694614578	9	0.56151619173088
GPATCH11	Acute Lymphoblastic Leukemia	MR Egger	0.0512194603799246	1	0.820954746892878			LYPD3	Acute lymphocytic leukaemia	MR Egger	12.7736628704522	7	0.0778188751812457
GPATCH11	Acute Lymphoblastic Leukemia	Inverse variance weighted	0.63272034206572	2	0.728796911354717			LYPD3	Acute lymphocytic leukaemia	Inverse variance weighted	14.6573455001316	8	0.0661607548226697
GPC1	Acute Lymphoblastic Leukemia	MR Egger	0.000140347197365217	1	0.990547824532338			NEGR1	Acute lymphocytic leukaemia	MR Egger	6.81368880001843	6	0.338421481017665
GPC1	Acute Lymphoblastic Leukemia	Inverse variance weighted	0.381987646655693	2	0.826137690917105			NEGR1	Acute lymphocytic leukaemia	Inverse variance weighted	7.2657155699342	7	0.401747964404026
GPM6A	Acute Lymphoblastic Leukemia	MR Egger	12.102930318196	22	0.955216785789398			BCL6	Acute lymphocytic leukaemia	MR Egger	14.9848586299692	4	0.00473272459882824
GPM6A	Acute Lymphoblastic Leukemia	Inverse variance weighted	12.300594084908	23	0.965567597697003			BCL6	Acute lymphocytic leukaemia	Inverse variance weighted	15.1663709648666	5	0.00967461911612272
GPNMB	Acute Lymphoblastic Leukemia	MR Egger	36.6779246081197	34	0.345671442458531			FSTL1	Acute lymphocytic leukaemia	MR Egger	1.83360128443332	4	0.766329397957843
GPNMB	Acute Lymphoblastic Leukemia	Inverse variance weighted	40.1378672013676	35	0.252947966483507			FSTL1	Acute lymphocytic leukaemia	Inverse variance weighted	1.86818164907708	5	0.867067399643167
GPR124	Acute Lymphoblastic Leukemia	MR Egger	12.176731446276	16	0.731726895130526			SPP1	Acute lymphocytic leukaemia	MR Egger	2.72044760124079	4	0.605641316380738
GPR124	Acute Lymphoblastic Leukemia	Inverse variance weighted	12.5320795927989	17	0.766903269702817			SPP1	Acute lymphocytic leukaemia	Inverse variance weighted	3.54480932211071	5	0.616618520281943
GPR162	Acute Lymphoblastic Leukemia	MR Egger	49.6253817494223	49	0.448186813008084			LUM	Acute lymphocytic leukaemia	MR Egger	6.52084613120111	10	0.769772474452235
GPR162	Acute Lymphoblastic Leukemia	Inverse variance weighted	49.6473377877816	50	0.48746759203209			LUM	Acute lymphocytic leukaemia	Inverse variance weighted	6.64442421423901	11	0.82710468632223
GPR19	Acute Lymphoblastic Leukemia	MR Egger	8.81907730933667	15	0.886785646104815			CD177	Acute lymphocytic leukaemia	MR Egger	10.2313612190958	9	0.332082073035808
GPR19	Acute Lymphoblastic Leukemia	Inverse variance weighted	9.6632072232661	16	0.88361470468512			CD177	Acute lymphocytic leukaemia	Inverse variance weighted	12.7291468621765	10	0.239212243804459
GPR25	Acute Lymphoblastic Leukemia	MR Egger	0.83517473040695	5	0.974735747857271			SMOC1	Acute lymphocytic leukaemia	MR Egger	0.254902790706924	2	0.880336203224372
GPR25	Acute Lymphoblastic Leukemia	Inverse variance weighted	1.11655449839619	6	0.980805678243398			SMOC1	Acute lymphocytic leukaemia	Inverse variance weighted	1.11003158096208	3	0.774652988681579
GPR65	Acute Lymphoblastic Leukemia	MR Egger	18.4823645867906	21	0.618307900574336			SERPINA10	Acute lymphocytic leukaemia	MR Egger	19.5447388991621	17	0.298174499952772
GPR65	Acute Lymphoblastic Leukemia	Inverse variance weighted	18.6366204989474	22	0.667646904861814			SERPINA10	Acute lymphocytic leukaemia	Inverse variance weighted	19.6594327289547	18	0.352316019784094
GPR89A	Acute Lymphoblastic Leukemia	MR Egger	3.64086579555748	1	0.0563776092104537			FLRT2	Acute lymphocytic leukaemia	MR Egger	3.23675025815995	8	0.918633603634229
GPR89A	Acute Lymphoblastic Leukemia	Inverse variance weighted	3.64179480278539	2	0.161880414021867			FLRT2	Acute lymphocytic leukaemia	Inverse variance weighted	3.68580956097804	9	0.930849311222719
GRAP2	Acute Lymphoblastic Leukemia	MR Egger	0.946532975579701	3	0.814186245055249			FLRT3	Acute lymphocytic leukaemia	MR Egger	30.0041140570184	17	0.0263154238167794
GRAP2	Acute Lymphoblastic Leukemia	Inverse variance weighted	2.71282347953139	4	0.606972540479352			FLRT3	Acute lymphocytic leukaemia	Inverse variance weighted	30.2176762606604	18	0.0353832003578329
GRK4	Acute Lymphoblastic Leukemia	MR Egger	20.8823532861433	23	0.588271999491164			ISLR2	Acute lymphocytic leukaemia	MR Egger	14.3946704697144	19	0.760217088948695
GRK4	Acute Lymphoblastic Leukemia	Inverse variance weighted	22.6399951283156	24	0.54112441509978			ISLR2	Acute lymphocytic leukaemia	Inverse variance weighted	15.7146877077638	20	0.734159309304756
GS1-124K5.11	Acute Lymphoblastic Leukemia	MR Egger	8.27864525299169	7	0.308665766107913			VTN	Acute lymphocytic leukaemia	MR Egger	17.945809263819	19	0.526060823848926
GS1-124K5.11	Acute Lymphoblastic Leukemia	Inverse variance weighted	8.66569316386173	8	0.371277534228536			VTN	Acute lymphocytic leukaemia	Inverse variance weighted	19.6644469916303	20	0.479088265818281
GS1-251I9.4	Acute Lymphoblastic Leukemia	MR Egger	1.62292771056385	2	0.444207334797514			DSC2	Acute lymphocytic leukaemia	MR Egger	1.12478640192511	4	0.890319891614948
GS1-251I9.4	Acute Lymphoblastic Leukemia	Inverse variance weighted	2.85500068716807	3	0.414525672314335			DSC2	Acute lymphocytic leukaemia	Inverse variance weighted	2.04944844462729	5	0.842261471957369
GSTA4	Acute Lymphoblastic Leukemia	MR Egger	10.312898122944	8	0.24374770237239			HK1	Acute lymphocytic leukaemia	MR Egger	9.66512485328349	5	0.0852992645770805
GSTA4	Acute Lymphoblastic Leukemia	Inverse variance weighted	11.7301975121051	9	0.228950344757238			HK1	Acute lymphocytic leukaemia	Inverse variance weighted	9.66688220142316	6	0.139399552603737
GTF2H5	Acute Lymphoblastic Leukemia	MR Egger	39.0800046928075	48	0.817160912696275			SEMA5A	Acute lymphocytic leukaemia	MR Egger	16.2929930182203	10	0.0915467100892407
GTF2H5	Acute Lymphoblastic Leukemia	Inverse variance weighted	41.4322605827414	49	0.77019045637923			SEMA5A	Acute lymphocytic leukaemia	Inverse variance weighted	17.9552443732564	11	0.0826249291837439
GTPBP3	Acute Lymphoblastic Leukemia	MR Egger	13.0929773874374	10	0.218519722090926			LTBP4	Acute lymphocytic leukaemia	MR Egger	9.48464220875723	7	0.219706649676169
GTPBP3	Acute Lymphoblastic Leukemia	Inverse variance weighted	13.2966375414338	11	0.27438028740626			LTBP4	Acute lymphocytic leukaemia	Inverse variance weighted	11.3205202962069	8	0.184190973715075
GTPBP4	Acute Lymphoblastic Leukemia	MR Egger	18.5706245088229	28	0.910859173723597			MDM2	Acute lymphocytic leukaemia	MR Egger	0.0524933136125137	1	0.818780162127074
GTPBP4	Acute Lymphoblastic Leukemia	Inverse variance weighted	22.7436211487137	29	0.788143349181072			MDM2	Acute lymphocytic leukaemia	Inverse variance weighted	0.269954711404083	2	0.873735696595476
GUCY1A3	Acute Lymphoblastic Leukemia	MR Egger	0.510049297288413	4	0.972515334102318			MDM4	Acute lymphocytic leukaemia	MR Egger	2.29153704877441	1	0.130081046749563
GUCY1A3	Acute Lymphoblastic Leukemia	Inverse variance weighted	1.26311725890664	5	0.938680730390821			MDM4	Acute lymphocytic leukaemia	Inverse variance weighted	2.36344208966121	2	0.30675035293464
GUSB	Acute Lymphoblastic Leukemia	MR Egger	7.42003405652254	8	0.492064476198351			IGHG4	Acute lymphocytic leukaemia	MR Egger	2.18402911426243	1	0.139448974264646
GUSB	Acute Lymphoblastic Leukemia	Inverse variance weighted	7.66172945196886	9	0.568561864215845			IGHG4	Acute lymphocytic leukaemia	Inverse variance weighted	2.20098373639041	2	0.332707395258774
GXYLT1	Acute Lymphoblastic Leukemia	MR Egger	18.3167378733463	22	0.687052450190167			WNT3A	Acute lymphocytic leukaemia	MR Egger	5.72715572189757	10	0.837641831713357
GXYLT1	Acute Lymphoblastic Leukemia	Inverse variance weighted	19.6788033110465	23	0.661201721892222			WNT3A	Acute lymphocytic leukaemia	Inverse variance weighted	7.2516058632361	11	0.778357238543688
GZMA	Acute Lymphoblastic Leukemia	MR Egger	2.83791141553428	5	0.724957972469988			SHANK3	Acute lymphocytic leukaemia	MR Egger	10.3539104815409	10	0.410011226983004
GZMA	Acute Lymphoblastic Leukemia	Inverse variance weighted	2.83864942938866	6	0.828808534397326			SHANK3	Acute lymphocytic leukaemia	Inverse variance weighted	10.7605081051869	11	0.463539913485966
H1FX	Acute Lymphoblastic Leukemia	MR Egger	2.10000275263499	5	0.835141910827752			WNT5A	Acute lymphocytic leukaemia	MR Egger	25.0422700572892	20	0.199818742622552
H1FX	Acute Lymphoblastic Leukemia	Inverse variance weighted	2.22558713586526	6	0.897826407805946			WNT5A	Acute lymphocytic leukaemia	Inverse variance weighted	25.3811334889332	21	0.231034455540684
HADH	Acute Lymphoblastic Leukemia	MR Egger	4.25648261222906	10	0.935035702786174			DEFB113	Acute lymphocytic leukaemia	MR Egger	2.22056172444734	1	0.136183503029807
HADH	Acute Lymphoblastic Leukemia	Inverse variance weighted	4.85588885268541	11	0.937944225839083			DEFB113	Acute lymphocytic leukaemia	Inverse variance weighted	2.52233693272419	2	0.283322779874291
HADHA	Acute Lymphoblastic Leukemia	MR Egger	6.91660444204868	7	0.437614392948484			CYB561D1	Acute lymphocytic leukaemia	MR Egger	0.952723775364311	3	0.812689237126697
HADHA	Acute Lymphoblastic Leukemia	Inverse variance weighted	7.47932498051204	8	0.485906336091468			CYB561D1	Acute lymphocytic leukaemia	Inverse variance weighted	4.75738023615748	4	0.313109589749657
HADHB	Acute Lymphoblastic Leukemia	MR Egger	8.18762835463066	3	0.0422890471665334			C5orf63	Acute lymphocytic leukaemia	MR Egger	3.42337046609362	3	0.33083755195472
HADHB	Acute Lymphoblastic Leukemia	Inverse variance weighted	9.60150847552781	4	0.0477027472850308			C5orf63	Acute lymphocytic leukaemia	Inverse variance weighted	3.44632394439019	4	0.486086699345144
HAR1A	Acute Lymphoblastic Leukemia	MR Egger	24.251542005391	28	0.668191282063773			B4GALT1	Acute lymphocytic leukaemia	MR Egger	8.58635068927176	9	0.476299050011653
HAR1A	Acute Lymphoblastic Leukemia	Inverse variance weighted	24.9138615260391	29	0.682709624567845			B4GALT1	Acute lymphocytic leukaemia	Inverse variance weighted	10.2376655719463	10	0.419895459273049
HBM	Acute Lymphoblastic Leukemia	MR Egger	7.73196460693428	11	0.737093838265768			RNF34	Acute lymphocytic leukaemia	MR Egger	3.61233748393953	2	0.164282340665632
HBM	Acute Lymphoblastic Leukemia	Inverse variance weighted	10.2277549558604	12	0.595987410502398			RNF34	Acute lymphocytic leukaemia	Inverse variance weighted	3.77619625835167	3	0.286667072421308
HBP1	Acute Lymphoblastic Leukemia	MR Egger	3.08716385073253	5	0.686549679798862			PCSK1	Acute lymphocytic leukaemia	MR Egger	17.131255827047	11	0.104052574329184
HBP1	Acute Lymphoblastic Leukemia	Inverse variance weighted	3.18034821411406	6	0.785894622943137			PCSK1	Acute lymphocytic leukaemia	Inverse variance weighted	19.2272517211929	12	0.0831898091135875
HBQ1	Acute Lymphoblastic Leukemia	MR Egger	15.4400661948356	21	0.800240784442613			ATP1B1	Acute lymphocytic leukaemia	MR Egger	11.1064452850501	5	0.0493098587746649
HBQ1	Acute Lymphoblastic Leukemia	Inverse variance weighted	16.1739590460064	22	0.80715923728674			ATP1B1	Acute lymphocytic leukaemia	Inverse variance weighted	11.1144676216333	6	0.0849024459442088
HCG22	Acute Lymphoblastic Leukemia	MR Egger	19.5298100354452	20	0.487665825159878			DEFB4A	Acute lymphocytic leukaemia	MR Egger	5.02694530322057	5	0.412600609833868
HCG22	Acute Lymphoblastic Leukemia	Inverse variance weighted	19.9310157398721	21	0.525634506859193			DEFB4A	Acute lymphocytic leukaemia	Inverse variance weighted	6.52181237490852	6	0.367338025702492
HCP5	Acute Lymphoblastic Leukemia	MR Egger	3.41480206327066	6	0.755268235886123			RELL1	Acute lymphocytic leukaemia	MR Egger	7.5646153273053	3	0.0559212458792277
HCP5	Acute Lymphoblastic Leukemia	Inverse variance weighted	3.86238955291636	7	0.795484089305408			RELL1	Acute lymphocytic leukaemia	Inverse variance weighted	7.6293584044887	4	0.106138568998847
HDAC7	Acute Lymphoblastic Leukemia	MR Egger	2.2800528792293	3	0.516353012794246			SPINK2	Acute lymphocytic leukaemia	MR Egger	2.25838146488506	3	0.520540764686995
HDAC7	Acute Lymphoblastic Leukemia	Inverse variance weighted	2.61837047001544	4	0.623572348311472			SPINK2	Acute lymphocytic leukaemia	Inverse variance weighted	2.35187866683171	4	0.671340456014299
HDDC3	Acute Lymphoblastic Leukemia	MR Egger	7.34829911977368	10	0.692204820150143			TMEM132D	Acute lymphocytic leukaemia	MR Egger	5.68827754214618	10	0.840737661997736
HDDC3	Acute Lymphoblastic Leukemia	Inverse variance weighted	9.17203660117185	11	0.606016102232207			TMEM132D	Acute lymphocytic leukaemia	Inverse variance weighted	5.80536420674373	11	0.886029998925158
HEG1	Acute Lymphoblastic Leukemia	MR Egger	15.8515505382055	18	0.602906919603462			MAN1C1	Acute lymphocytic leukaemia	MR Egger	10.9706816078542	13	0.613273816012072
HEG1	Acute Lymphoblastic Leukemia	Inverse variance weighted	17.733382653157	19	0.540308471921454			MAN1C1	Acute lymphocytic leukaemia	Inverse variance weighted	11.4193624078648	14	0.652823044352256
HELLS	Acute Lymphoblastic Leukemia	MR Egger	36.9334851560105	34	0.334913224609407			WFDC10A	Acute lymphocytic leukaemia	MR Egger	4.28009735570188	2	0.117649115976259
HELLS	Acute Lymphoblastic Leukemia	Inverse variance weighted	38.5775921514722	35	0.311013184030259			WFDC10A	Acute lymphocytic leukaemia	Inverse variance weighted	4.78713675118659	3	0.188064289258251
HERC2	Acute Lymphoblastic Leukemia	MR Egger	5.36859355152504	11	0.912010999256454			PARVA	Acute lymphocytic leukaemia	MR Egger	1.28486613613058	3	0.732729861095864
HERC2	Acute Lymphoblastic Leukemia	Inverse variance weighted	7.20880748042468	12	0.843511707813634			PARVA	Acute lymphocytic leukaemia	Inverse variance weighted	1.40046657893732	4	0.844113918707675
HERC6	Acute Lymphoblastic Leukemia	MR Egger	1.58893101702848	11	0.999496814894258			IL20RB	Acute lymphocytic leukaemia	MR Egger	0.727581882692215	1	0.393668119081675
HERC6	Acute Lymphoblastic Leukemia	Inverse variance weighted	10.2773762617135	12	0.591640794170386			IL20RB	Acute lymphocytic leukaemia	Inverse variance weighted	1.41111465616985	2	0.49383327039512
HIPK2	Acute Lymphoblastic Leukemia	MR Egger	4.35972078153006	2	0.113057313383745			IQCF3	Acute lymphocytic leukaemia	MR Egger	2.70155953756165	2	0.259038191977566
HIPK2	Acute Lymphoblastic Leukemia	Inverse variance weighted	4.40952597577785	3	0.220503731764417			IQCF3	Acute lymphocytic leukaemia	Inverse variance weighted	4.10859810162651	3	0.249973757070039
HIVEP1	Acute Lymphoblastic Leukemia	MR Egger	9.61868395132898	10	0.474559572099905			DIXDC1	Acute lymphocytic leukaemia	MR Egger	3.22055206259856	2	0.199832446451667
HIVEP1	Acute Lymphoblastic Leukemia	Inverse variance weighted	10.2144404269988	11	0.511207594776802			DIXDC1	Acute lymphocytic leukaemia	Inverse variance weighted	10.7733774281664	3	0.0130166025638751
HIVEP3	Acute Lymphoblastic Leukemia	MR Egger	21.5868727230312	25	0.659472725728262			SPRN	Acute lymphocytic leukaemia	MR Egger	5.11832936056959	5	0.401610595365897
HIVEP3	Acute Lymphoblastic Leukemia	Inverse variance weighted	21.9947532940891	26	0.688983690424096			SPRN	Acute lymphocytic leukaemia	Inverse variance weighted	5.17055884041345	6	0.522131343756395
HLA-DOA	Acute Lymphoblastic Leukemia	MR Egger	10.4081244542938	14	0.73177780095719			USP8	Acute lymphocytic leukaemia	MR Egger	3.67804141666619	5	0.596635094874028
HLA-DOA	Acute Lymphoblastic Leukemia	Inverse variance weighted	11.2290983515008	15	0.7361913288665			USP8	Acute lymphocytic leukaemia	Inverse variance weighted	3.68510517725433	6	0.719201299733299
HLA-DPB2	Acute Lymphoblastic Leukemia	MR Egger	32.6453542469164	38	0.715050980203032			FNDC4	Acute lymphocytic leukaemia	MR Egger	0.826239047972948	1	0.363362306854158
HLA-DPB2	Acute Lymphoblastic Leukemia	Inverse variance weighted	33.6028419791066	39	0.714077912246008			FNDC4	Acute lymphocytic leukaemia	Inverse variance weighted	1.79181762494435	2	0.408236419650574
HLA-H	Acute Lymphoblastic Leukemia	MR Egger	5.10154	9	0.8253681627275			SMIM13	Acute lymphocytic leukaemia	MR Egger	0.114501089631019	2	0.944357435864569
HLA-H	Acute Lymphoblastic Leukemia	Inverse variance weighted	5.36176272568974	10	0.865739865911868			SMIM13	Acute lymphocytic leukaemia	Inverse variance weighted	0.611122713785296	3	0.89388142824512
HLA-U	Acute Lymphoblastic Leukemia	MR Egger	8.45475349849803	17	0.955832597452586			MRPL33	Acute lymphocytic leukaemia	MR Egger	6.62944778539967	9	0.675636527488602
HLA-U	Acute Lymphoblastic Leukemia	Inverse variance weighted	9.06557921715779	18	0.958204144992552			MRPL33	Acute lymphocytic leukaemia	Inverse variance weighted	12.7091417366427	10	0.240391707606907
HMGCR	Acute Lymphoblastic Leukemia	MR Egger	3.5867078442259	5	0.610310149175654			CHAD	Acute lymphocytic leukaemia	MR Egger	8.54015662268038	11	0.66425490131589
HMGCR	Acute Lymphoblastic Leukemia	Inverse variance weighted	5.23534322186328	6	0.51400231324966			CHAD	Acute lymphocytic leukaemia	Inverse variance weighted	8.57144617979241	12	0.739032895178922
HMGN1	Acute Lymphoblastic Leukemia	MR Egger	22.8978563572494	26	0.638719141129444			PXDN	Acute lymphocytic leukaemia	MR Egger	1.04749272143995	2	0.592297426449796
HMGN1	Acute Lymphoblastic Leukemia	Inverse variance weighted	23.093269814938	27	0.679991569783692			PXDN	Acute lymphocytic leukaemia	Inverse variance weighted	3.0777104547708	3	0.379798250434737
HMOX1	Acute Lymphoblastic Leukemia	MR Egger	6.11095096935681	12	0.910385997458055			RCAN1	Acute lymphocytic leukaemia	MR Egger	3.1390163854297	4	0.534836772471226
HMOX1	Acute Lymphoblastic Leukemia	Inverse variance weighted	6.25718702435827	13	0.936289579914188			RCAN1	Acute lymphocytic leukaemia	Inverse variance weighted	3.51295822141129	5	0.621427797429818
HNMT	Acute Lymphoblastic Leukemia	MR Egger	21.4899578184767	25	0.664996532678787			NEURL4	Acute lymphocytic leukaemia	MR Egger	1.44290948318929	2	0.486044672007629
HNMT	Acute Lymphoblastic Leukemia	Inverse variance weighted	21.5227845833622	26	0.714501890389084			NEURL4	Acute lymphocytic leukaemia	Inverse variance weighted	2.25307614561932	3	0.521569822408537
HOXA1	Acute Lymphoblastic Leukemia	MR Egger	7.13619562212095	11	0.787949251008825			PTH1R	Acute lymphocytic leukaemia	MR Egger	0.0126483058750331	2	0.993695802428582
HOXA1	Acute Lymphoblastic Leukemia	Inverse variance weighted	7.50357592256091	12	0.822622895922773			PTH1R	Acute lymphocytic leukaemia	Inverse variance weighted	3.45700138196878	3	0.326381866283763
HPCAL4	Acute Lymphoblastic Leukemia	MR Egger	75.1508142312347	64	0.160668219150886			ITPKA	Acute lymphocytic leukaemia	MR Egger	0.0273060434613112	2	0.986439758049115
HPCAL4	Acute Lymphoblastic Leukemia	Inverse variance weighted	75.6430414121631	65	0.172421957742374			ITPKA	Acute lymphocytic leukaemia	Inverse variance weighted	1.85881550406184	3	0.602220410071238
HPS6	Acute Lymphoblastic Leukemia	MR Egger	9.04830574180487	9	0.432827150366079			LTB4R	Acute lymphocytic leukaemia	MR Egger	2.09349788460721	4	0.718567027439544
HPS6	Acute Lymphoblastic Leukemia	Inverse variance weighted	12.3206272579836	10	0.264171048642896			LTB4R	Acute lymphocytic leukaemia	Inverse variance weighted	2.10670495094292	5	0.834192100533422
HRK	Acute Lymphoblastic Leukemia	MR Egger	23.1943062107667	32	0.872080466179325			FAM171A2	Acute lymphocytic leukaemia	MR Egger	6.24820457014119	4	0.181363147702926
HRK	Acute Lymphoblastic Leukemia	Inverse variance weighted	23.7005137579125	33	0.882982781824154			FAM171A2	Acute lymphocytic leukaemia	Inverse variance weighted	6.81253905547084	5	0.234959495507661
HSD17B1	Acute Lymphoblastic Leukemia	MR Egger	6.00023991420448	5	0.306195574418443			CNOT1	Acute lymphocytic leukaemia	MR Egger	0.00369729235747247	1	0.951514217939978
HSD17B1	Acute Lymphoblastic Leukemia	Inverse variance weighted	6.02299996104322	6	0.420618549196557			CNOT1	Acute lymphocytic leukaemia	Inverse variance weighted	0.128016264524118	2	0.937997371459278
HSD17B12	Acute Lymphoblastic Leukemia	MR Egger	36.6249589647403	43	0.742733727945427			TMEM87B	Acute lymphocytic leukaemia	MR Egger	4.17536770715267	1	0.0410156615199306
HSD17B12	Acute Lymphoblastic Leukemia	Inverse variance weighted	36.6897779098457	44	0.774872106864038			TMEM87B	Acute lymphocytic leukaemia	Inverse variance weighted	4.25920155359182	2	0.118884745928982
HSD17B14	Acute Lymphoblastic Leukemia	MR Egger	5.11361449250055	10	0.883460288318787			ARFIP1	Acute lymphocytic leukaemia	MR Egger	1.89775765474603	3	0.593896185489324
HSD17B14	Acute Lymphoblastic Leukemia	Inverse variance weighted	5.49093235806015	11	0.905084938384614			ARFIP1	Acute lymphocytic leukaemia	Inverse variance weighted	2.02316558187934	4	0.731497906413194
HSD17B7	Acute Lymphoblastic Leukemia	MR Egger	4.87830587287581	6	0.559513547908647			PDE6D	Acute lymphocytic leukaemia	MR Egger	0.0334799904889636	1	0.854817334668423
HSD17B7	Acute Lymphoblastic Leukemia	Inverse variance weighted	6.87892714653582	7	0.441593979590151			PDE6D	Acute lymphocytic leukaemia	Inverse variance weighted	0.540300403822651	2	0.763264841888461
HSD17B7P2	Acute Lymphoblastic Leukemia	MR Egger	16.3569124017394	16	0.428340565645294			GRID1	Acute lymphocytic leukaemia	MR Egger	4.21209127104778	4	0.378062702229061
HSD17B7P2	Acute Lymphoblastic Leukemia	Inverse variance weighted	16.4426803770954	17	0.492697951649632			GRID1	Acute lymphocytic leukaemia	Inverse variance weighted	7.79340246357937	5	0.167995193312251
HSD3B7	Acute Lymphoblastic Leukemia	MR Egger	9.05197796231826	17	0.938616997958456			HCAR2	Acute lymphocytic leukaemia	MR Egger	1.11153839861356	1	0.291747779179765
HSD3B7	Acute Lymphoblastic Leukemia	Inverse variance weighted	9.58972402427086	18	0.944478137913427			HCAR2	Acute lymphocytic leukaemia	Inverse variance weighted	4.73857486917834	2	0.093547361148216
HSP90AA1	Acute Lymphoblastic Leukemia	MR Egger	14.9175	14	0.383818202380365			EIF3J	Acute lymphocytic leukaemia	MR Egger	1.20421908506224	1	0.272480046880436
HSP90AA1	Acute Lymphoblastic Leukemia	Inverse variance weighted	15.0413394025211	15	0.448443566316041			EIF3J	Acute lymphocytic leukaemia	Inverse variance weighted	1.20780781022177	2	0.546673304181172
HSPA1B	Acute Lymphoblastic Leukemia	MR Egger	18.0267097010042	23	0.756038920267163			MIOX	Acute lymphocytic leukaemia	MR Egger	1.76585424641091	3	0.622393471201896
HSPA1B	Acute Lymphoblastic Leukemia	Inverse variance weighted	18.5728071600888	24	0.774371355487408			MIOX	Acute lymphocytic leukaemia	Inverse variance weighted	2.02584356068983	4	0.731005356447529
HSPG2	Acute Lymphoblastic Leukemia	MR Egger	14.9684301601523	14	0.380316181364702			F8	Acute lymphocytic leukaemia	MR Egger	9.60115731873425	15	0.844050388041069
HSPG2	Acute Lymphoblastic Leukemia	Inverse variance weighted	15.4432763856096	15	0.419983307270625			F8	Acute lymphocytic leukaemia	Inverse variance weighted	10.1782119027284	16	0.857157332566916
HTATIP2	Acute Lymphoblastic Leukemia	MR Egger	44.4412037839533	47	0.579150613930952			SLC35G2	Acute lymphocytic leukaemia	MR Egger	8.96849945703063	12	0.705618623863815
HTATIP2	Acute Lymphoblastic Leukemia	Inverse variance weighted	45.839638575096	48	0.561795354478949			SLC35G2	Acute lymphocytic leukaemia	Inverse variance weighted	10.1922644789373	13	0.678141708102136
HTRA2	Acute Lymphoblastic Leukemia	MR Egger	0.465396493086536	1	0.495112655440155			SLC26A11	Acute lymphocytic leukaemia	MR Egger	5.2431134422001	4	0.263249571882362
HTRA2	Acute Lymphoblastic Leukemia	Inverse variance weighted	0.494194129035602	2	0.781064876166272			SLC26A11	Acute lymphocytic leukaemia	Inverse variance weighted	8.27041691867377	5	0.141948680862115
HYAL3	Acute Lymphoblastic Leukemia	MR Egger	37.8690820223825	39	0.521353676049089			DUS2	Acute lymphocytic leukaemia	MR Egger	5.24597870290185	3	0.154646410993813
HYAL3	Acute Lymphoblastic Leukemia	Inverse variance weighted	37.9269341339068	40	0.563936345677656			DUS2	Acute lymphocytic leukaemia	Inverse variance weighted	5.41772689461981	4	0.247056563620567
ICA1L	Acute Lymphoblastic Leukemia	MR Egger	25.8038981022984	25	0.418122179244303			TRADD	Acute lymphocytic leukaemia	MR Egger	7.42603028820032	7	0.385907970810627
ICA1L	Acute Lymphoblastic Leukemia	Inverse variance weighted	26.0261377536415	26	0.461668682069239			TRADD	Acute lymphocytic leukaemia	Inverse variance weighted	9.67514572258081	8	0.288570599283534
ID3	Acute Lymphoblastic Leukemia	MR Egger	16.1920518999808	10	0.0942650948815499			SCAMP5	Acute lymphocytic leukaemia	MR Egger	0.158847853388911	1	0.690219492600482
ID3	Acute Lymphoblastic Leukemia	Inverse variance weighted	16.4086950613605	11	0.126623540417448			SCAMP5	Acute lymphocytic leukaemia	Inverse variance weighted	3.76761783454585	2	0.152010008140635
IFI27	Acute Lymphoblastic Leukemia	MR Egger	11.7955039983267	11	0.379209267147194			ATP2A3	Acute lymphocytic leukaemia	MR Egger	4.62059698690481	6	0.59330967526019
IFI27	Acute Lymphoblastic Leukemia	Inverse variance weighted	12.743305144427	12	0.387971201510614			ATP2A3	Acute lymphocytic leukaemia	Inverse variance weighted	8.58083896016704	7	0.284166395396393
IFIT5	Acute Lymphoblastic Leukemia	MR Egger	25.0796080031954	31	0.764145170046655			RAB35	Acute lymphocytic leukaemia	MR Egger	9.91527719959439	4	0.0418792665896638
IFIT5	Acute Lymphoblastic Leukemia	Inverse variance weighted	25.2710496033425	32	0.79490503594106			RAB35	Acute lymphocytic leukaemia	Inverse variance weighted	10.2448266074361	5	0.068588061240489
IFNG-AS1	Acute Lymphoblastic Leukemia	MR Egger	31.7212138072274	36	0.672300995207361			RPRD1A	Acute lymphocytic leukaemia	MR Egger	2.42109392672457	2	0.298034221040853
IFNG-AS1	Acute Lymphoblastic Leukemia	Inverse variance weighted	34.9975026826428	37	0.563233690635108			RPRD1A	Acute lymphocytic leukaemia	Inverse variance weighted	2.50418051339908	3	0.474536044701149
IFNGR1	Acute Lymphoblastic Leukemia	MR Egger	7.96449123842474	10	0.632305506345391			EMC4	Acute lymphocytic leukaemia	MR Egger	8.67527492009629	5	0.122738667670168
IFNGR1	Acute Lymphoblastic Leukemia	Inverse variance weighted	7.99824449282771	11	0.713461077234704			EMC4	Acute lymphocytic leukaemia	Inverse variance weighted	12.9978084466281	6	0.0430707621378056
IFRD1	Acute Lymphoblastic Leukemia	MR Egger	52.2661555565727	47	0.276818390109975			PTCHD3	Acute lymphocytic leukaemia	MR Egger	0.146876015889214	1	0.701538805976875
IFRD1	Acute Lymphoblastic Leukemia	Inverse variance weighted	53.0695660188566	48	0.285095049942848			PTCHD3	Acute lymphocytic leukaemia	Inverse variance weighted	1.50482126710487	2	0.471229221475151
IFT57	Acute Lymphoblastic Leukemia	MR Egger	16.0835802911172	11	0.138056247268513			ASAP2	Acute lymphocytic leukaemia	MR Egger	0.693438907794296	4	0.952135566139396
IFT57	Acute Lymphoblastic Leukemia	Inverse variance weighted	17.1527814589824	12	0.143940004830735			ASAP2	Acute lymphocytic leukaemia	Inverse variance weighted	1.6075346109594	5	0.900336687420471
IFT74	Acute Lymphoblastic Leukemia	MR Egger	6.39664118244315	11	0.845632772700699			ARHGEF25	Acute lymphocytic leukaemia	MR Egger	3.49807779371728	3	0.321011510100199
IFT74	Acute Lymphoblastic Leukemia	Inverse variance weighted	7.54614396452823	12	0.819516834959718			ARHGEF25	Acute lymphocytic leukaemia	Inverse variance weighted	4.28207226571791	4	0.369175400137939
IGFBP7	Acute Lymphoblastic Leukemia	MR Egger	24.3461	25	0.49945562935552			HS6ST2	Acute lymphocytic leukaemia	MR Egger	10.7714490904924	6	0.0957021670975763
IGFBP7	Acute Lymphoblastic Leukemia	Inverse variance weighted	24.4553528538918	26	0.549944929227791			HS6ST2	Acute lymphocytic leukaemia	Inverse variance weighted	11.0662903361136	7	0.135753492996572
IGHV1-46	Acute Lymphoblastic Leukemia	MR Egger	1.53616855606735	3	0.673948153902794			KCNG4	Acute lymphocytic leukaemia	MR Egger	9.05429091562875	5	0.10691817201845
IGHV1-46	Acute Lymphoblastic Leukemia	Inverse variance weighted	1.53795092833948	4	0.819898342495637			KCNG4	Acute lymphocytic leukaemia	Inverse variance weighted	9.47921534041716	6	0.148366551301365
IGHV1-69	Acute Lymphoblastic Leukemia	MR Egger	9.09591222051188	12	0.694717152751849			NAP1L2	Acute lymphocytic leukaemia	MR Egger	6.6239735953298	4	0.157144733977534
IGHV1-69	Acute Lymphoblastic Leukemia	Inverse variance weighted	9.32928821517684	13	0.747644058276624			NAP1L2	Acute lymphocytic leukaemia	Inverse variance weighted	8.78817125310921	5	0.117817487014123
IGHV3-20	Acute Lymphoblastic Leukemia	MR Egger	7.95104929427923	6	0.241711547537763			UTS2R	Acute lymphocytic leukaemia	MR Egger	0.123448412955143	1	0.725324090549038
IGHV3-20	Acute Lymphoblastic Leukemia	Inverse variance weighted	9.14129181871258	7	0.242670477097583			UTS2R	Acute lymphocytic leukaemia	Inverse variance weighted	0.12368330959355	2	0.940031724521365
IGHV3-66	Acute Lymphoblastic Leukemia	MR Egger	8.42690877663408	14	0.865921448142472			MYOM2	Acute lymphocytic leukaemia	MR Egger	14.8719662990815	8	0.061683330781553
IGHV3-66	Acute Lymphoblastic Leukemia	Inverse variance weighted	9.25867237391997	15	0.863608419946471			MYOM2	Acute lymphocytic leukaemia	Inverse variance weighted	16.5877444813041	9	0.0555771028914706
IGHV3-73	Acute Lymphoblastic Leukemia	MR Egger	1.33652091781722	1	0.247648444450448			POLI	Acute lymphocytic leukaemia	MR Egger	0.897665717523417	2	0.638372788195723
IGHV3-73	Acute Lymphoblastic Leukemia	Inverse variance weighted	1.35012814683963	2	0.509123798259583			POLI	Acute lymphocytic leukaemia	Inverse variance weighted	0.907283732796788	3	0.823669730310705
IGHV4-28	Acute Lymphoblastic Leukemia	MR Egger	0.236841078310058	1	0.626497022175721			KCNN1	Acute lymphocytic leukaemia	MR Egger	5.3782981976812	3	0.146101668870272
IGHV4-28	Acute Lymphoblastic Leukemia	Inverse variance weighted	0.510581691246738	2	0.774691149661544			KCNN1	Acute lymphocytic leukaemia	Inverse variance weighted	5.40918830514962	4	0.247827970639273
IGHV4-39	Acute Lymphoblastic Leukemia	MR Egger	9.04260785402354	7	0.249611440354522			GPR26	Acute lymphocytic leukaemia	MR Egger	5.13501039085539	3	0.162173794069925
IGHV4-39	Acute Lymphoblastic Leukemia	Inverse variance weighted	9.04367758183075	8	0.338624782969588			GPR26	Acute lymphocytic leukaemia	Inverse variance weighted	5.15446345755715	4	0.271812581821224
IGHVIII-67-4	Acute Lymphoblastic Leukemia	MR Egger	3.42452471404812	4	0.48944692379953			MYCT1	Acute lymphocytic leukaemia	MR Egger	0.0405125380868261	2	0.97994751091434
IGHVIII-67-4	Acute Lymphoblastic Leukemia	Inverse variance weighted	6.09563760246692	5	0.297023908504101			MYCT1	Acute lymphocytic leukaemia	Inverse variance weighted	3.01344202612922	3	0.389557319861243
IGLV1-41	Acute Lymphoblastic Leukemia	MR Egger	11.7346899785506	14	0.627599719502687			EIF1AD	Acute lymphocytic leukaemia	MR Egger	2.09780996045279	3	0.552355950309098
IGLV1-41	Acute Lymphoblastic Leukemia	Inverse variance weighted	11.7543074658143	15	0.697522832635627			EIF1AD	Acute lymphocytic leukaemia	Inverse variance weighted	3.64933325556073	4	0.45553793756537
IGLV3-12	Acute Lymphoblastic Leukemia	MR Egger	9.05349894938995	10	0.52703397895924			ADAM29	Acute lymphocytic leukaemia	MR Egger	0.0591484715807659	1	0.807846912911664
IGLV3-12	Acute Lymphoblastic Leukemia	Inverse variance weighted	9.06576166035867	11	0.615822175723693			ADAM29	Acute lymphocytic leukaemia	Inverse variance weighted	1.70744296821999	2	0.425827270132568
IGLV3-19	Acute Lymphoblastic Leukemia	MR Egger	0.0810145626576768	1	0.775927186378076			SWAP70	Acute lymphocytic leukaemia	MR Egger	6.57989944038288	8	0.582559426442712
IGLV3-19	Acute Lymphoblastic Leukemia	Inverse variance weighted	0.935743651835341	2	0.626333798272709			SWAP70	Acute lymphocytic leukaemia	Inverse variance weighted	7.02659133974431	9	0.634350746125398
IGSF6	Acute Lymphoblastic Leukemia	MR Egger	4.62404545265571	9	0.86577351194673			REPIN1	Acute lymphocytic leukaemia	MR Egger	0.475960828035859	2	0.788218128968728
IGSF6	Acute Lymphoblastic Leukemia	Inverse variance weighted	4.64208426519812	10	0.913770318131205			REPIN1	Acute lymphocytic leukaemia	Inverse variance weighted	2.04481501116451	3	0.56315747449444
IKBIP	Acute Lymphoblastic Leukemia	MR Egger	19.2310372113962	25	0.785910156055624			ACBD7	Acute lymphocytic leukaemia	MR Egger	0.518785929111207	1	0.471360030002875
IKBIP	Acute Lymphoblastic Leukemia	Inverse variance weighted	25.7166394011167	26	0.478762490904227			ACBD7	Acute lymphocytic leukaemia	Inverse variance weighted	2.45083004142623	2	0.293635810088497
IKBKAP	Acute Lymphoblastic Leukemia	MR Egger	10.4374454708267	9	0.316245101389512			RBL2	Acute lymphocytic leukaemia	MR Egger	3.93499100667076	8	0.862940624102745
IKBKAP	Acute Lymphoblastic Leukemia	Inverse variance weighted	10.5453277188345	10	0.394019309967876			RBL2	Acute lymphocytic leukaemia	Inverse variance weighted	4.40553731046771	9	0.882754498430161
IKZF1	Acute Lymphoblastic Leukemia	MR Egger	28.4109973414266	38	0.870916083083998			SSU72	Acute lymphocytic leukaemia	MR Egger	3.36281528271087	6	0.762122936124669
IKZF1	Acute Lymphoblastic Leukemia	Inverse variance weighted	29.1524087155919	39	0.874600162966258			SSU72	Acute lymphocytic leukaemia	Inverse variance weighted	4.29922132107083	7	0.744739755818743
IL10	Acute Lymphoblastic Leukemia	MR Egger	1.88954474673884	4	0.75606537261022			PSMD4	Acute lymphocytic leukaemia	MR Egger	0.99734833378574	1	0.317952985276037
IL10	Acute Lymphoblastic Leukemia	Inverse variance weighted	1.89139462275748	5	0.863959343424347			PSMD4	Acute lymphocytic leukaemia	Inverse variance weighted	1.09210552115485	2	0.5792316699772
IL12RB1	Acute Lymphoblastic Leukemia	MR Egger	31.0050670896888	33	0.566745339679365			HDLBP	Acute lymphocytic leukaemia	MR Egger	0.0503734111711654	1	0.822414779850204
IL12RB1	Acute Lymphoblastic Leukemia	Inverse variance weighted	31.5080812527771	34	0.590350416241128			HDLBP	Acute lymphocytic leukaemia	Inverse variance weighted	1.45796638415496	2	0.482399248176173
IL16	Acute Lymphoblastic Leukemia	MR Egger	22.7715493985838	25	0.590901490479006			PSMD11	Acute lymphocytic leukaemia	MR Egger	0.079719632398157	1	0.777677716264185
IL16	Acute Lymphoblastic Leukemia	Inverse variance weighted	22.8386223543365	26	0.642060017660018			PSMD11	Acute lymphocytic leukaemia	Inverse variance weighted	1.98176820869979	2	0.371248323630102
IL18BP	Acute Lymphoblastic Leukemia	MR Egger	9.29143875221769	6	0.157838960204026			RND1	Acute lymphocytic leukaemia	MR Egger	4.67109952360985	3	0.197526986870581
IL18BP	Acute Lymphoblastic Leukemia	Inverse variance weighted	9.2931932249371	7	0.232285777958455			RND1	Acute lymphocytic leukaemia	Inverse variance weighted	5.22010600209848	4	0.265449530916107
IL1R2	Acute Lymphoblastic Leukemia	MR Egger	16.2364155429276	23	0.844962748761502			DVL2	Acute lymphocytic leukaemia	MR Egger	2.2110060281725	6	0.899305556482936
IL1R2	Acute Lymphoblastic Leukemia	Inverse variance weighted	19.0609875730181	24	0.748729325357202			DVL2	Acute lymphocytic leukaemia	Inverse variance weighted	3.38626285820705	7	0.847121490152106
IL1RAP	Acute Lymphoblastic Leukemia	MR Egger	5.21861131108754	8	0.733975556642158			RACGAP1	Acute lymphocytic leukaemia	MR Egger	5.8259978997796	10	0.82966407229316
IL1RAP	Acute Lymphoblastic Leukemia	Inverse variance weighted	5.99026394573351	9	0.74089232324888			RACGAP1	Acute lymphocytic leukaemia	Inverse variance weighted	6.75467655080841	11	0.818588070284163
IL7R	Acute Lymphoblastic Leukemia	MR Egger	26.472434595742	20	0.150769579742185			APBB3	Acute lymphocytic leukaemia	MR Egger	1.01990217173126	2	0.600524952252078
IL7R	Acute Lymphoblastic Leukemia	Inverse variance weighted	28.4535341265908	21	0.127751107619346			APBB3	Acute lymphocytic leukaemia	Inverse variance weighted	8.30252599368752	3	0.0401561636941069
ILDR1	Acute Lymphoblastic Leukemia	MR Egger	1.04755426064989	6	0.983745175960058			REXO2	Acute lymphocytic leukaemia	MR Egger	0.007864790817779	1	0.929333322079038
ILDR1	Acute Lymphoblastic Leukemia	Inverse variance weighted	4.14312170892639	7	0.763152955655373			REXO2	Acute lymphocytic leukaemia	Inverse variance weighted	0.602744158655654	2	0.739802456329435
ILKAP	Acute Lymphoblastic Leukemia	MR Egger	0.364761752803742	1	0.545873499687413			THTPA	Acute lymphocytic leukaemia	MR Egger	3.8317041310594	3	0.28021988318386
ILKAP	Acute Lymphoblastic Leukemia	Inverse variance weighted	0.545435133325968	2	0.76130777596323			THTPA	Acute lymphocytic leukaemia	Inverse variance weighted	4.25919435736288	4	0.372062704169391
ILVBL	Acute Lymphoblastic Leukemia	MR Egger	1.5694969776042	7	0.979805684805016			RAB27B	Acute lymphocytic leukaemia	MR Egger	0.232339154859357	2	0.890324231600667
ILVBL	Acute Lymphoblastic Leukemia	Inverse variance weighted	3.42707766619033	8	0.904774872177526			RAB27B	Acute lymphocytic leukaemia	Inverse variance weighted	2.70359486365556	3	0.439616730589769
IMMP2L	Acute Lymphoblastic Leukemia	MR Egger	37.1255497315173	46	0.821661045930311			RAB31	Acute lymphocytic leukaemia	MR Egger	1.23130083480763	1	0.267154205770833
IMMP2L	Acute Lymphoblastic Leukemia	Inverse variance weighted	37.5799185210292	47	0.835296012318545			RAB31	Acute lymphocytic leukaemia	Inverse variance weighted	1.60417283890455	2	0.448392452743523
INO80B	Acute Lymphoblastic Leukemia	MR Egger	9.84332530924146	7	0.197627314823568			RABEPK	Acute lymphocytic leukaemia	MR Egger	10.5040799097092	7	0.161761180365497
INO80B	Acute Lymphoblastic Leukemia	Inverse variance weighted	10.6806764764088	8	0.220457066930131			RABEPK	Acute lymphocytic leukaemia	Inverse variance weighted	10.7962524488703	8	0.213513215449929
INPP5B	Acute Lymphoblastic Leukemia	MR Egger	47.2615062404234	58	0.842132272954723			RFESD	Acute lymphocytic leukaemia	MR Egger	0.9015542926015	2	0.637132813762409
INPP5B	Acute Lymphoblastic Leukemia	Inverse variance weighted	49.2086265646564	59	0.814441503253615			RFESD	Acute lymphocytic leukaemia	Inverse variance weighted	3.5836320702715	3	0.310076209026653
INPP5K	Acute Lymphoblastic Leukemia	MR Egger	15.8230319378543	16	0.465378759010893			NEURL1	Acute lymphocytic leukaemia	MR Egger	5.3942405609905	4	0.249183410216794
INPP5K	Acute Lymphoblastic Leukemia	Inverse variance weighted	16.1611197600329	17	0.51244302482119			NEURL1	Acute lymphocytic leukaemia	Inverse variance weighted	5.4053970231958	5	0.368430977183561
INTS10	Acute Lymphoblastic Leukemia	MR Egger	27.7356804952194	32	0.682369164746798			ANXA10	Acute lymphocytic leukaemia	MR Egger	2.0130582283619	3	0.569700848924874
INTS10	Acute Lymphoblastic Leukemia	Inverse variance weighted	27.7356830942096	33	0.726660195716239			ANXA10	Acute lymphocytic leukaemia	Inverse variance weighted	3.12892838994961	4	0.536486098333393
INTS6	Acute Lymphoblastic Leukemia	MR Egger	12.7298320088748	18	0.807366366587091			MAGEA10	Acute lymphocytic leukaemia	MR Egger	5.71455256156245	2	0.0574249569097747
INTS6	Acute Lymphoblastic Leukemia	Inverse variance weighted	12.9109582243347	19	0.843097941944061			MAGEA10	Acute lymphocytic leukaemia	Inverse variance weighted	6.59736299516182	3	0.0859008261948497
IRF5	Acute Lymphoblastic Leukemia	MR Egger	38.4586751766663	52	0.918882930904019			AK5	Acute lymphocytic leukaemia	MR Egger	3.46243233264332	3	0.325667306980082
IRF5	Acute Lymphoblastic Leukemia	Inverse variance weighted	40.917679777505	53	0.886998858332869			AK5	Acute lymphocytic leukaemia	Inverse variance weighted	3.91157864529545	4	0.418104618953689
IRS1	Acute Lymphoblastic Leukemia	MR Egger	14.2787596943566	17	0.647280742011793			CREBBP	Acute lymphocytic leukaemia	MR Egger	6.29944138028311	10	0.789509379736051
IRS1	Acute Lymphoblastic Leukemia	Inverse variance weighted	14.3276464130533	18	0.707496204442457			CREBBP	Acute lymphocytic leukaemia	Inverse variance weighted	6.72677752980922	11	0.820758352831594
ISCA2	Acute Lymphoblastic Leukemia	MR Egger	32.7393255526246	35	0.577705078526598			MAD1L1	Acute lymphocytic leukaemia	MR Egger	6.76558565742984	3	0.0797567890843476
ISCA2	Acute Lymphoblastic Leukemia	Inverse variance weighted	33.918446521688	36	0.567949020746693			MAD1L1	Acute lymphocytic leukaemia	Inverse variance weighted	7.10647919478982	4	0.130367144791574
ISG20	Acute Lymphoblastic Leukemia	MR Egger	26.523292919056	33	0.780154435005684			AP2A2	Acute lymphocytic leukaemia	MR Egger	2.49210400986906	2	0.287638152152877
ISG20	Acute Lymphoblastic Leukemia	Inverse variance weighted	28.8668613772215	34	0.71731376995841			AP2A2	Acute lymphocytic leukaemia	Inverse variance weighted	3.30971541985931	3	0.346292726638616
ISG20L2	Acute Lymphoblastic Leukemia	MR Egger	1.06477087457884	3	0.785584608255432			PPP2R5A	Acute lymphocytic leukaemia	MR Egger	1.51332140083151	1	0.218632968789172
ISG20L2	Acute Lymphoblastic Leukemia	Inverse variance weighted	2.51391612663283	4	0.642145640683249			PPP2R5A	Acute lymphocytic leukaemia	Inverse variance weighted	1.71637840326622	2	0.423929037716561
ISOC2	Acute Lymphoblastic Leukemia	MR Egger	6.62538914242584	8	0.577535456041529			NADK	Acute lymphocytic leukaemia	MR Egger	0.8197035942278	3	0.844748620371562
ISOC2	Acute Lymphoblastic Leukemia	Inverse variance weighted	7.91411083769538	9	0.54282448269191			NADK	Acute lymphocytic leukaemia	Inverse variance weighted	1.23594017800963	4	0.872146593893387
ITFG2	Acute Lymphoblastic Leukemia	MR Egger	8.05140338957657	10	0.623815814693423			GRB14	Acute lymphocytic leukaemia	MR Egger	3.33285607713296	5	0.648815311062121
ITFG2	Acute Lymphoblastic Leukemia	Inverse variance weighted	8.18222170276436	11	0.696893653770702			GRB14	Acute lymphocytic leukaemia	Inverse variance weighted	9.67186298563579	6	0.139168188071346
ITGA4	Acute Lymphoblastic Leukemia	MR Egger	45.3906275581549	45	0.455668133841417			RBBP5	Acute lymphocytic leukaemia	MR Egger	0.040708461437992	1	0.840101711404119
ITGA4	Acute Lymphoblastic Leukemia	Inverse variance weighted	46.834448361267	46	0.43803669877618			RBBP5	Acute lymphocytic leukaemia	Inverse variance weighted	1.75663335113813	2	0.415481713880746
ITGAD	Acute Lymphoblastic Leukemia	MR Egger	14.0587319526379	27	0.980674781742569			ZYX	Acute lymphocytic leukaemia	MR Egger	0.0297105607580079	2	0.985254514946077
ITGAD	Acute Lymphoblastic Leukemia	Inverse variance weighted	17.5923654737748	28	0.935954604833813			ZYX	Acute lymphocytic leukaemia	Inverse variance weighted	0.456166478090579	3	0.928410338912891
ITGAL	Acute Lymphoblastic Leukemia	MR Egger	7.98160487193392	13	0.844796615011119			PIR	Acute lymphocytic leukaemia	MR Egger	2.7733350591391	4	0.596444266676086
ITGAL	Acute Lymphoblastic Leukemia	Inverse variance weighted	10.444284963169	14	0.72903353122267			PIR	Acute lymphocytic leukaemia	Inverse variance weighted	4.04383226512887	5	0.54312260568587
ITGAM	Acute Lymphoblastic Leukemia	MR Egger	2.29542423914589	5	0.806938690933171			USO1	Acute lymphocytic leukaemia	MR Egger	0.251750147628928	1	0.615845431886645
ITGAM	Acute Lymphoblastic Leukemia	Inverse variance weighted	2.62782377882189	6	0.853896821511109			USO1	Acute lymphocytic leukaemia	Inverse variance weighted	1.05850305469105	2	0.58904568931517
ITGAX	Acute Lymphoblastic Leukemia	MR Egger	38.009101831811	42	0.646780359099907			IFIT3	Acute lymphocytic leukaemia	MR Egger	6.14981409793895	1	0.0131425915348283
ITGAX	Acute Lymphoblastic Leukemia	Inverse variance weighted	40.8284689541764	43	0.565902397301873			IFIT3	Acute lymphocytic leukaemia	Inverse variance weighted	6.95423462773553	2	0.0308963472553255
ITGB1BP1	Acute Lymphoblastic Leukemia	MR Egger	16.505351384619	23	0.832797590349178			DHX38	Acute lymphocytic leukaemia	MR Egger	2.99652523936449	3	0.39216122633293
ITGB1BP1	Acute Lymphoblastic Leukemia	Inverse variance weighted	16.8544542744806	24	0.854802790229816			DHX38	Acute lymphocytic leukaemia	Inverse variance weighted	3.45074	4	0.48540825923495
ITIH2	Acute Lymphoblastic Leukemia	MR Egger	19.7273536441467	19	0.411149004999884			KCNIP1	Acute lymphocytic leukaemia	MR Egger	9.70096615429227	5	0.0841654388236403
ITIH2	Acute Lymphoblastic Leukemia	Inverse variance weighted	22.819126762261	20	0.297762853431244			KCNIP1	Acute lymphocytic leukaemia	Inverse variance weighted	12.5778619170365	6	0.0502513924738354
ITIH4	Acute Lymphoblastic Leukemia	MR Egger	44.6973093963059	44	0.442357643046209			TOM1L1	Acute lymphocytic leukaemia	MR Egger	10.8789526783465	5	0.0538335242693184
ITIH4	Acute Lymphoblastic Leukemia	Inverse variance weighted	47.0757843459143	45	0.387587811410567			TOM1L1	Acute lymphocytic leukaemia	Inverse variance weighted	12.0381472990253	6	0.0611231757675985
ITK	Acute Lymphoblastic Leukemia	MR Egger	21.0398700998721	17	0.224511959213549			MACROD1	Acute lymphocytic leukaemia	MR Egger	7.48783627161809	5	0.186812605929555
ITK	Acute Lymphoblastic Leukemia	Inverse variance weighted	21.5521448885454	18	0.252476551296279			MACROD1	Acute lymphocytic leukaemia	Inverse variance weighted	9.00857198907306	6	0.17309656192362
ITM2B	Acute Lymphoblastic Leukemia	MR Egger	9.29059072298993	17	0.930701761552928			ROCK2	Acute lymphocytic leukaemia	MR Egger	1.32025827588705	1	0.25054570350506
ITM2B	Acute Lymphoblastic Leukemia	Inverse variance weighted	12.4381683466343	18	0.823810509579054			ROCK2	Acute lymphocytic leukaemia	Inverse variance weighted	1.33216861832014	2	0.513716198422988
ITM2C	Acute Lymphoblastic Leukemia	MR Egger	14.7628324870576	18	0.678182420360746			PNKP	Acute lymphocytic leukaemia	MR Egger	0.27128093121685	1	0.602473804379991
ITM2C	Acute Lymphoblastic Leukemia	Inverse variance weighted	15.2032503167053	19	0.709594629636682			PNKP	Acute lymphocytic leukaemia	Inverse variance weighted	0.76886503907446	2	0.680836888231387
ITPKB-IT1	Acute Lymphoblastic Leukemia	MR Egger	6.26600418231655	13	0.935933544191053			PDGFC	Acute lymphocytic leukaemia	MR Egger	7.67082880621592	3	0.0533278328510491
ITPKB-IT1	Acute Lymphoblastic Leukemia	Inverse variance weighted	6.35605256653008	14	0.956703837688159			PDGFC	Acute lymphocytic leukaemia	Inverse variance weighted	10.8559142148008	4	0.0282319678236255
JAK2	Acute Lymphoblastic Leukemia	MR Egger	9.71642121263601	17	0.915078977544936			ATP13A1	Acute lymphocytic leukaemia	MR Egger	4.55428988431928	9	0.871304907691138
JAK2	Acute Lymphoblastic Leukemia	Inverse variance weighted	10.6218133528721	18	0.909710836338507			ATP13A1	Acute lymphocytic leukaemia	Inverse variance weighted	4.57572217818541	10	0.917661973124043
JAZF1	Acute Lymphoblastic Leukemia	MR Egger	21.6900410019498	33	0.934288336036899			PPP2R3A	Acute lymphocytic leukaemia	MR Egger	5.08260371840652	5	0.405882594147356
JAZF1	Acute Lymphoblastic Leukemia	Inverse variance weighted	22.5056895629665	34	0.934261521114095			PPP2R3A	Acute lymphocytic leukaemia	Inverse variance weighted	5.25132999713753	6	0.512005764051185
JHDM1D	Acute Lymphoblastic Leukemia	MR Egger	8.01167765432628	10	0.627696223733961			CA10	Acute lymphocytic leukaemia	MR Egger	14.1080411429868	15	0.517351324847708
JHDM1D	Acute Lymphoblastic Leukemia	Inverse variance weighted	8.01168051219523	11	0.712257122943692			CA10	Acute lymphocytic leukaemia	Inverse variance weighted	14.3379532868355	16	0.573552749008556
JMJD7	Acute Lymphoblastic Leukemia	MR Egger	1.55443017438472	2	0.459684411367315			FGFR3	Acute lymphocytic leukaemia	MR Egger	4.2798792295273	5	0.509863193533477
JMJD7	Acute Lymphoblastic Leukemia	Inverse variance weighted	2.10871977358547	3	0.550150709080773			FGFR3	Acute lymphocytic leukaemia	Inverse variance weighted	4.60141598805524	6	0.595851085464267
JSRP1	Acute Lymphoblastic Leukemia	MR Egger	0.12567174692983	1	0.722962622037087			ELANE	Acute lymphocytic leukaemia	MR Egger	16.8801323055442	15	0.326080488706906
JSRP1	Acute Lymphoblastic Leukemia	Inverse variance weighted	0.140982105925435	2	0.931936077555331			ELANE	Acute lymphocytic leukaemia	Inverse variance weighted	17.2223507361121	16	0.371351905154774
KATNAL1	Acute Lymphoblastic Leukemia	MR Egger	8.93372991824944	7	0.257449067342957			HSPA6	Acute lymphocytic leukaemia	MR Egger	14.8905189848029	4	0.00493375846491746
KATNAL1	Acute Lymphoblastic Leukemia	Inverse variance weighted	8.96438951663683	8	0.345308927224572			HSPA6	Acute lymphocytic leukaemia	Inverse variance weighted	15.1007408929708	5	0.00994044989880493
KATNBL1	Acute Lymphoblastic Leukemia	MR Egger	2.83124425541843	5	0.725983485943973			CCT7	Acute lymphocytic leukaemia	MR Egger	0.0295465748341851	1	0.863523087416779
KATNBL1	Acute Lymphoblastic Leukemia	Inverse variance weighted	4.02301095420647	6	0.673562256432886			CCT7	Acute lymphocytic leukaemia	Inverse variance weighted	0.898387609652736	2	0.638142411629297
KB-431C1.3	Acute Lymphoblastic Leukemia	MR Egger	12.4234571847041	16	0.714351855723786			INHBB	Acute lymphocytic leukaemia	MR Egger	11.1131549176762	5	0.0491820429639241
KB-431C1.3	Acute Lymphoblastic Leukemia	Inverse variance weighted	16.0632223666832	17	0.519357500832915			INHBB	Acute lymphocytic leukaemia	Inverse variance weighted	11.980092621995	6	0.0624143898886262
KB-431C1.4	Acute Lymphoblastic Leukemia	MR Egger	21.9915875663429	24	0.579768892792974			CSNK2A2	Acute lymphocytic leukaemia	MR Egger	5.11674416511122	3	0.163445462070728
KB-431C1.4	Acute Lymphoblastic Leukemia	Inverse variance weighted	25.4648405919874	25	0.436579621396615			CSNK2A2	Acute lymphocytic leukaemia	Inverse variance weighted	5.16674316090077	4	0.270612480970764
KCNB1	Acute Lymphoblastic Leukemia	MR Egger	1.26590433916882	4	0.867133230222622			CSF1R	Acute lymphocytic leukaemia	MR Egger	13.8849182107637	21	0.87449152222232
KCNB1	Acute Lymphoblastic Leukemia	Inverse variance weighted	1.31411730659683	5	0.933472335894498			CSF1R	Acute lymphocytic leukaemia	Inverse variance weighted	13.9572381473977	22	0.902989938161776
KCNJ10	Acute Lymphoblastic Leukemia	MR Egger	2.3398599572486	4	0.673521689490068			IL5RA	Acute lymphocytic leukaemia	MR Egger	19.0705384309663	23	0.697122902204726
KCNJ10	Acute Lymphoblastic Leukemia	Inverse variance weighted	4.4423305168052	5	0.487636296784902			IL5RA	Acute lymphocytic leukaemia	Inverse variance weighted	19.5346291208149	24	0.722909329463461
KCNJ15	Acute Lymphoblastic Leukemia	MR Egger	43.236057392841	36	0.189710491638401			ODC1	Acute lymphocytic leukaemia	MR Egger	6.24097847118278	9	0.715578862688908
KCNJ15	Acute Lymphoblastic Leukemia	Inverse variance weighted	43.2564394773832	37	0.22169281058087			ODC1	Acute lymphocytic leukaemia	Inverse variance weighted	6.24581492932559	10	0.794205376695147
KCNK17	Acute Lymphoblastic Leukemia	MR Egger	56.0498832658068	53	0.361205500766136			SLC5A8	Acute lymphocytic leukaemia	MR Egger	33.6908167518506	24	0.090315812453797
KCNK17	Acute Lymphoblastic Leukemia	Inverse variance weighted	58.0368256273702	54	0.328889122460945			SLC5A8	Acute lymphocytic leukaemia	Inverse variance weighted	34.9400032351162	25	0.0892943778682176
KCNK6	Acute Lymphoblastic Leukemia	MR Egger	4.17707642416943	7	0.759170772362495			KIAA0319L	Acute lymphocytic leukaemia	MR Egger	4.53220809601389	2	0.103715464455176
KCNK6	Acute Lymphoblastic Leukemia	Inverse variance weighted	4.38294623639974	8	0.821026527028395			KIAA0319L	Acute lymphocytic leukaemia	Inverse variance weighted	4.63339715388005	3	0.200695756277963
KCNMB4	Acute Lymphoblastic Leukemia	MR Egger	17.1071543093892	25	0.877870467934059			ANXA2	Acute lymphocytic leukaemia	MR Egger	4.06180862180195	6	0.668312189460547
KCNMB4	Acute Lymphoblastic Leukemia	Inverse variance weighted	17.5506813075308	26	0.891504194210778			ANXA2	Acute lymphocytic leukaemia	Inverse variance weighted	5.62106922527506	7	0.584623634508744
KCNQ5	Acute Lymphoblastic Leukemia	MR Egger	12.6453554940234	21	0.920537226797307			HMGCS2	Acute lymphocytic leukaemia	MR Egger	0.00561232588737711	2	0.997197770651248
KCNQ5	Acute Lymphoblastic Leukemia	Inverse variance weighted	12.6752524155291	22	0.94182439892435			HMGCS2	Acute lymphocytic leukaemia	Inverse variance weighted	1.21572506334514	3	0.749235315387442
KDM1B	Acute Lymphoblastic Leukemia	MR Egger	27.9473477546357	21	0.141650952344865			CLTC	Acute lymphocytic leukaemia	MR Egger	0.0244905245908997	1	0.875643264117171
KDM1B	Acute Lymphoblastic Leukemia	Inverse variance weighted	28.6191785393055	22	0.156057905342905			CLTC	Acute lymphocytic leukaemia	Inverse variance weighted	1.66844556620603	2	0.434211827089523
KHNYN	Acute Lymphoblastic Leukemia	MR Egger	24.5011967664362	28	0.654826800784102			FCN2	Acute lymphocytic leukaemia	MR Egger	10.8390572776736	15	0.763917645451605
KHNYN	Acute Lymphoblastic Leukemia	Inverse variance weighted	26.3253531981385	29	0.608054048381594			FCN2	Acute lymphocytic leukaemia	Inverse variance weighted	13.2835571108071	16	0.651922915545826
KHSRP	Acute Lymphoblastic Leukemia	MR Egger	0.0069634165971251	1	0.933496047751224			PAK4	Acute lymphocytic leukaemia	MR Egger	0.0737703047948922	1	0.785924298130985
KHSRP	Acute Lymphoblastic Leukemia	Inverse variance weighted	0.462661633764277	2	0.793476927048417			PAK4	Acute lymphocytic leukaemia	Inverse variance weighted	0.0791935906858351	2	0.961176912038852
KIAA0226L	Acute Lymphoblastic Leukemia	MR Egger	12.7217261054072	16	0.692984957385605			PRTN3	Acute lymphocytic leukaemia	MR Egger	27.8847319055177	23	0.220171920289804
KIAA0226L	Acute Lymphoblastic Leukemia	Inverse variance weighted	13.5143954625808	17	0.701127919109128			PRTN3	Acute lymphocytic leukaemia	Inverse variance weighted	30.7740982257547	24	0.160403558786706
KIAA0247	Acute Lymphoblastic Leukemia	MR Egger	4.24356015415797	10	0.93569134645797			FGF19	Acute lymphocytic leukaemia	MR Egger	17.177272072891	5	0.0041755814789798
KIAA0247	Acute Lymphoblastic Leukemia	Inverse variance weighted	4.32436020994158	11	0.959450746277267			FGF19	Acute lymphocytic leukaemia	Inverse variance weighted	17.9874906884686	6	0.00626353264051975
KIAA1109	Acute Lymphoblastic Leukemia	MR Egger	1.1047688859369	3	0.775922982087313			SPOP	Acute lymphocytic leukaemia	MR Egger	0.0718336108494976	1	0.788685517271407
KIAA1109	Acute Lymphoblastic Leukemia	Inverse variance weighted	3.62251645896372	4	0.459495524184243			SPOP	Acute lymphocytic leukaemia	Inverse variance weighted	2.48108298871176	2	0.289227560436761
KIAA1279	Acute Lymphoblastic Leukemia	MR Egger	7.93968607283667	5	0.159591121751873			SFXN5	Acute lymphocytic leukaemia	MR Egger	2.29661047077646	2	0.317173849153929
KIAA1279	Acute Lymphoblastic Leukemia	Inverse variance weighted	7.9808228269979	6	0.239511644856634			SFXN5	Acute lymphocytic leukaemia	Inverse variance weighted	3.48612921435155	3	0.322565576154427
KIAA1407	Acute Lymphoblastic Leukemia	MR Egger	4.96752346385224	4	0.290646053096077			IL12B	Acute lymphocytic leukaemia	MR Egger	10.0662792996378	16	0.863144195578317
KIAA1407	Acute Lymphoblastic Leukemia	Inverse variance weighted	5.82941893296645	5	0.323172689146316			IL12B	Acute lymphocytic leukaemia	Inverse variance weighted	11.0305711606893	17	0.854970342297116
KIAA1468	Acute Lymphoblastic Leukemia	MR Egger	15.962339459086	20	0.71895789369568			INHBA	Acute lymphocytic leukaemia	MR Egger	2.38973108670012	5	0.793002376517683
KIAA1468	Acute Lymphoblastic Leukemia	Inverse variance weighted	23.607506347473	21	0.312461806918198			INHBA	Acute lymphocytic leukaemia	Inverse variance weighted	5.82360863842542	6	0.443237013707639
KIAA1522	Acute Lymphoblastic Leukemia	MR Egger	6.30092091071762	7	0.505084387044314			FRZB	Acute lymphocytic leukaemia	MR Egger	11.6255103480384	17	0.822264466946534
KIAA1522	Acute Lymphoblastic Leukemia	Inverse variance weighted	8.7146765290693	8	0.366934291704349			FRZB	Acute lymphocytic leukaemia	Inverse variance weighted	11.7809735300445	18	0.858336743139896
KIAA1524	Acute Lymphoblastic Leukemia	MR Egger	10.6741790509376	13	0.63809171004954			IL3RA	Acute lymphocytic leukaemia	MR Egger	8.5168977535849	16	0.931969287297007
KIAA1524	Acute Lymphoblastic Leukemia	Inverse variance weighted	13.6611535694859	14	0.475248329927379			IL3RA	Acute lymphocytic leukaemia	Inverse variance weighted	10.5658750162492	17	0.878222031561464
KIAA1551	Acute Lymphoblastic Leukemia	MR Egger	62.9579377900497	54	0.188937360033646			CCL8	Acute lymphocytic leukaemia	MR Egger	13.5092612694737	13	0.409287910729793
KIAA1551	Acute Lymphoblastic Leukemia	Inverse variance weighted	65.1148970283952	55	0.165121022501162			CCL8	Acute lymphocytic leukaemia	Inverse variance weighted	14.2261270144313	14	0.433003909873934
KIAA1737	Acute Lymphoblastic Leukemia	MR Egger	29.9942243729566	32	0.568385391261993			CROT	Acute lymphocytic leukaemia	MR Egger	23.703277497799	10	0.00842815997297318
KIAA1737	Acute Lymphoblastic Leukemia	Inverse variance weighted	30.3805823628727	33	0.598183190757052			CROT	Acute lymphocytic leukaemia	Inverse variance weighted	24.0273067373447	11	0.012618569458907
KIAA2013	Acute Lymphoblastic Leukemia	MR Egger	31.1109288446715	28	0.312176772005122			APOBEC3G	Acute lymphocytic leukaemia	MR Egger	3.24596226934889	4	0.517539397613609
KIAA2013	Acute Lymphoblastic Leukemia	Inverse variance weighted	31.2335	29	0.354499899141819			APOBEC3G	Acute lymphocytic leukaemia	Inverse variance weighted	4.85401343800114	5	0.433955316729273
KIF19	Acute Lymphoblastic Leukemia	MR Egger	11.8584069301231	8	0.157634108828796			ARHGEF7	Acute lymphocytic leukaemia	MR Egger	5.18681687099977	4	0.268660370981869
KIF19	Acute Lymphoblastic Leukemia	Inverse variance weighted	11.9454237825076	9	0.216403571584125			ARHGEF7	Acute lymphocytic leukaemia	Inverse variance weighted	5.22767940481846	5	0.388730596346327
KIF20B	Acute Lymphoblastic Leukemia	MR Egger	11.3758651826728	11	0.412332669854856			NAB1	Acute lymphocytic leukaemia	MR Egger	4.1918346815574	2	0.122957398067662
KIF20B	Acute Lymphoblastic Leukemia	Inverse variance weighted	12.165452056128	12	0.432485179478488			NAB1	Acute lymphocytic leukaemia	Inverse variance weighted	4.67244016499606	3	0.197415171507155
KIF24	Acute Lymphoblastic Leukemia	MR Egger	0.98236235106631	3	0.805519639971156			MCF2L	Acute lymphocytic leukaemia	MR Egger	3.52674861082207	3	0.317309450549769
KIF24	Acute Lymphoblastic Leukemia	Inverse variance weighted	1.02464268868325	4	0.906036615008628			MCF2L	Acute lymphocytic leukaemia	Inverse variance weighted	3.59155838354578	4	0.464093915371266
KIF26A	Acute Lymphoblastic Leukemia	MR Egger	16.3806742022817	16	0.426722906638251			UGP2	Acute lymphocytic leukaemia	MR Egger	0.716101693116257	3	0.869410292023867
KIF26A	Acute Lymphoblastic Leukemia	Inverse variance weighted	16.393926171709	17	0.49610073830902			UGP2	Acute lymphocytic leukaemia	Inverse variance weighted	1.08534267680347	4	0.89659072729249
KIF27	Acute Lymphoblastic Leukemia	MR Egger	11.9861421966349	11	0.364685771099125			FARS2	Acute lymphocytic leukaemia	MR Egger	5.85721577012413	3	0.118767444276283
KIF27	Acute Lymphoblastic Leukemia	Inverse variance weighted	12.4769567190873	12	0.408173702412121			FARS2	Acute lymphocytic leukaemia	Inverse variance weighted	8.42059417576626	4	0.0773310121978577
KIR3DL2	Acute Lymphoblastic Leukemia	MR Egger	9.67393013440735	13	0.720356021935028			SPSB1	Acute lymphocytic leukaemia	MR Egger	4.06406535714156	2	0.13106882939021
KIR3DL2	Acute Lymphoblastic Leukemia	Inverse variance weighted	10.128233796891	14	0.752749286846141			SPSB1	Acute lymphocytic leukaemia	Inverse variance weighted	4.34360048289267	3	0.226672253150137
KLC1	Acute Lymphoblastic Leukemia	MR Egger	31.1068021060726	33	0.561618660591032			DPY30	Acute lymphocytic leukaemia	MR Egger	2.52283745782845	5	0.773051845675154
KLC1	Acute Lymphoblastic Leukemia	Inverse variance weighted	35.0725704232302	34	0.417039676956126			DPY30	Acute lymphocytic leukaemia	Inverse variance weighted	4.37125949949561	6	0.626569504258608
KLF10	Acute Lymphoblastic Leukemia	MR Egger	0.00938685799300422	1	0.922817086728573			SULT1A3	Acute lymphocytic leukaemia	MR Egger	10.2129650257532	5	0.0694210224962008
KLF10	Acute Lymphoblastic Leukemia	Inverse variance weighted	1.25863328336768	2	0.532955876426048			SULT1A3	Acute lymphocytic leukaemia	Inverse variance weighted	12.2562714598676	6	0.0564898912438389
KLF12	Acute Lymphoblastic Leukemia	MR Egger	4.01656086733725	9	0.910319150261039			DDX23	Acute lymphocytic leukaemia	MR Egger	10.4042251748881	4	0.0341421491155876
KLF12	Acute Lymphoblastic Leukemia	Inverse variance weighted	4.01680078854173	10	0.946585886131684			DDX23	Acute lymphocytic leukaemia	Inverse variance weighted	13.031447367529	5	0.0230858477217504
KLF9	Acute Lymphoblastic Leukemia	MR Egger	3.6946055525848	6	0.717923692630518			NUDT12	Acute lymphocytic leukaemia	MR Egger	1.3459	4	0.853541987527032
KLF9	Acute Lymphoblastic Leukemia	Inverse variance weighted	5.40906068238637	7	0.610174318090316			NUDT12	Acute lymphocytic leukaemia	Inverse variance weighted	1.39291207973604	5	0.92508704222114
KLHDC7A	Acute Lymphoblastic Leukemia	MR Egger	0.659408593276858	4	0.956238698494518			DAPK1	Acute lymphocytic leukaemia	MR Egger	4.10296409342377	6	0.66274477953805
KLHDC7A	Acute Lymphoblastic Leukemia	Inverse variance weighted	6.22274258235531	5	0.285144540904567			DAPK1	Acute lymphocytic leukaemia	Inverse variance weighted	5.03537433234756	7	0.655646182076057
KLHL3	Acute Lymphoblastic Leukemia	MR Egger	17.7820098610133	20	0.601765781496629			LAP3	Acute lymphocytic leukaemia	MR Egger	1.78846996895432	5	0.877570934097745
KLHL3	Acute Lymphoblastic Leukemia	Inverse variance weighted	20.023510291953	21	0.519772513328889			LAP3	Acute lymphocytic leukaemia	Inverse variance weighted	4.4873019041737	6	0.611033733945266
KNDC1	Acute Lymphoblastic Leukemia	MR Egger	7.30643937376614	12	0.836716237426545			AGAP3	Acute lymphocytic leukaemia	MR Egger	3.49203136039937	2	0.174467695561485
KNDC1	Acute Lymphoblastic Leukemia	Inverse variance weighted	8.04697613905964	13	0.840526442601986			AGAP3	Acute lymphocytic leukaemia	Inverse variance weighted	3.75063951019534	3	0.289680024658733
KRIT1	Acute Lymphoblastic Leukemia	MR Egger	0.130786372978594	2	0.936699093535012			KIF3A	Acute lymphocytic leukaemia	MR Egger	17.1127158028184	7	0.016683649461393
KRIT1	Acute Lymphoblastic Leukemia	Inverse variance weighted	0.464302159541468	3	0.926661086532851			KIF3A	Acute lymphocytic leukaemia	Inverse variance weighted	17.2609872963365	8	0.027503311284064
KRT18P8	Acute Lymphoblastic Leukemia	MR Egger	1.04724194293861	6	0.983757860087242			MYOM3	Acute lymphocytic leukaemia	MR Egger	6.88307209168359	5	0.229482647845943
KRT18P8	Acute Lymphoblastic Leukemia	Inverse variance weighted	1.65641036584573	7	0.976395867401485			MYOM3	Acute lymphocytic leukaemia	Inverse variance weighted	7.54190792552607	6	0.273620435430761
KRT8P12	Acute Lymphoblastic Leukemia	MR Egger	5.57327583292844	12	0.936048924391152			KPNA6	Acute lymphocytic leukaemia	MR Egger	1.08050938938665e-06	1	0.999170618668066
KRT8P12	Acute Lymphoblastic Leukemia	Inverse variance weighted	5.59983357951506	13	0.959513329678066			KPNA6	Acute lymphocytic leukaemia	Inverse variance weighted	0.203237554309772	2	0.903373872791155
KTN1	Acute Lymphoblastic Leukemia	MR Egger	10.3650504614741	16	0.846882033948444			HSD17B14	Acute lymphocytic leukaemia	MR Egger	2.89874973626286	4	0.574909850625414
KTN1	Acute Lymphoblastic Leukemia	Inverse variance weighted	14.0797976987151	17	0.661445519630641			HSD17B14	Acute lymphocytic leukaemia	Inverse variance weighted	5.17229636914121	5	0.395217022047681
L1TD1	Acute Lymphoblastic Leukemia	MR Egger	23.2412308463207	24	0.505597334356573			TTL	Acute lymphocytic leukaemia	MR Egger	6.68609643186354	2	0.0353291026887253
L1TD1	Acute Lymphoblastic Leukemia	Inverse variance weighted	25.4925168567462	25	0.435061109625191			TTL	Acute lymphocytic leukaemia	Inverse variance weighted	6.85288077210328	3	0.0767377654774466
L3MBTL2	Acute Lymphoblastic Leukemia	MR Egger	18.9743528891902	22	0.646911635834692			PPFIA1	Acute lymphocytic leukaemia	MR Egger	0.0896546667472592	1	0.764616635167905
L3MBTL2	Acute Lymphoblastic Leukemia	Inverse variance weighted	19.7371203051062	23	0.657713282990848			PPFIA1	Acute lymphocytic leukaemia	Inverse variance weighted	1.20143278559797	2	0.548418612186486
L3MBTL3	Acute Lymphoblastic Leukemia	MR Egger	78.3213230831558	70	0.231766017306901			ARHGEF1	Acute lymphocytic leukaemia	MR Egger	0.492959747884102	1	0.482609991045027
L3MBTL3	Acute Lymphoblastic Leukemia	Inverse variance weighted	80.3542994483616	71	0.209446359014857			ARHGEF1	Acute lymphocytic leukaemia	Inverse variance weighted	1.6577284567756	2	0.436544820075776
LA16c-358B7.3	Acute Lymphoblastic Leukemia	MR Egger	3.97930282299348	8	0.85898598489664			BARD1	Acute lymphocytic leukaemia	MR Egger	1.05753500877428	2	0.58933086996376
LA16c-358B7.3	Acute Lymphoblastic Leukemia	Inverse variance weighted	8.16693923766292	9	0.517414378728798			BARD1	Acute lymphocytic leukaemia	Inverse variance weighted	4.98951284925251	3	0.17256667762769
LAX1	Acute Lymphoblastic Leukemia	MR Egger	18.9844946466974	29	0.921684963607104			RGS18	Acute lymphocytic leukaemia	MR Egger	1.25543473009384	1	0.262517006187394
LAX1	Acute Lymphoblastic Leukemia	Inverse variance weighted	23.2064267999403	30	0.806679416372055			RGS18	Acute lymphocytic leukaemia	Inverse variance weighted	1.44615556966241	2	0.485256440330143
LBH	Acute Lymphoblastic Leukemia	MR Egger	40.2129828424113	29	0.0805144156493659			CRYZ	Acute lymphocytic leukaemia	MR Egger	16.2595425047575	14	0.297782636989283
LBH	Acute Lymphoblastic Leukemia	Inverse variance weighted	40.2412799848748	30	0.100275033041516			CRYZ	Acute lymphocytic leukaemia	Inverse variance weighted	16.7517016361852	15	0.333923115996397
LCA5L	Acute Lymphoblastic Leukemia	MR Egger	11.3740026901462	17	0.836474274995523			DDX25	Acute lymphocytic leukaemia	MR Egger	4.20855048631434	2	0.121934014764098
LCA5L	Acute Lymphoblastic Leukemia	Inverse variance weighted	11.391584776788	18	0.877007087165599			DDX25	Acute lymphocytic leukaemia	Inverse variance weighted	4.99032697258246	3	0.172506822727057
LDLRAD3	Acute Lymphoblastic Leukemia	MR Egger	7.9484153694877	5	0.159101565635513			NMRAL1	Acute lymphocytic leukaemia	MR Egger	10.0375670762033	12	0.612664795496477
LDLRAD3	Acute Lymphoblastic Leukemia	Inverse variance weighted	9.52066172933484	6	0.14634388248091			NMRAL1	Acute lymphocytic leukaemia	Inverse variance weighted	11.3477335418853	13	0.581711739023153
LEMD2	Acute Lymphoblastic Leukemia	MR Egger	4.78992786048236	11	0.940911613392281			EIF4G3	Acute lymphocytic leukaemia	MR Egger	1.61220979532694	1	0.204181450994341
LEMD2	Acute Lymphoblastic Leukemia	Inverse variance weighted	4.80045224284225	12	0.96431387571447			EIF4G3	Acute lymphocytic leukaemia	Inverse variance weighted	5.78879589664659	2	0.0553323279894958
LGALS2	Acute Lymphoblastic Leukemia	MR Egger	59.7672832617572	72	0.847837265891839			EPB41L1	Acute lymphocytic leukaemia	MR Egger	6.75378856495141	3	0.0801734678513601
LGALS2	Acute Lymphoblastic Leukemia	Inverse variance weighted	59.768412844178	73	0.867176463750486			EPB41L1	Acute lymphocytic leukaemia	Inverse variance weighted	6.84330070209913	4	0.144404434659085
LIG1	Acute Lymphoblastic Leukemia	MR Egger	26.4327229512128	21	0.190427548217192			FBL	Acute lymphocytic leukaemia	MR Egger	5.11562690311137	4	0.275637882569961
LIG1	Acute Lymphoblastic Leukemia	Inverse variance weighted	26.4348213598432	22	0.233481843300218			FBL	Acute lymphocytic leukaemia	Inverse variance weighted	5.16885656212018	5	0.395622395143047
LILRB2	Acute Lymphoblastic Leukemia	MR Egger	14.6747067712575	15	0.475092460384739			DOCK9	Acute lymphocytic leukaemia	MR Egger	2.91931683133804	1	0.087524912918693
LILRB2	Acute Lymphoblastic Leukemia	Inverse variance weighted	15.7398202807306	16	0.471262331821898			DOCK9	Acute lymphocytic leukaemia	Inverse variance weighted	4.09973818317131	2	0.128751757173018
LIMS2	Acute Lymphoblastic Leukemia	MR Egger	26.6872538972776	28	0.535322649024876			GNMT	Acute lymphocytic leukaemia	MR Egger	3.1882866681626	2	0.203082427799691
LIMS2	Acute Lymphoblastic Leukemia	Inverse variance weighted	28.6814368233662	29	0.481745039148377			GNMT	Acute lymphocytic leukaemia	Inverse variance weighted	4.65805131628121	3	0.198618346026371
LIN7A	Acute Lymphoblastic Leukemia	MR Egger	19.3003214800597	15	0.200445934182825			PAPSS1	Acute lymphocytic leukaemia	MR Egger	2.99004425829834	4	0.55949284999578
LIN7A	Acute Lymphoblastic Leukemia	Inverse variance weighted	19.3261342283334	16	0.252114168405494			PAPSS1	Acute lymphocytic leukaemia	Inverse variance weighted	2.99563278103411	5	0.700659174782123
LIN9	Acute Lymphoblastic Leukemia	MR Egger	1.22322	2	0.542476564441396			DCP1A	Acute lymphocytic leukaemia	MR Egger	6.8890287507728	6	0.331231873447035
LIN9	Acute Lymphoblastic Leukemia	Inverse variance weighted	1.26729247057298	3	0.736914061767535			DCP1A	Acute lymphocytic leukaemia	Inverse variance weighted	7.00703498134295	7	0.428147745135008
LINC00092	Acute Lymphoblastic Leukemia	MR Egger	7.42391952633543	5	0.190972985311999			TNFAIP3	Acute lymphocytic leukaemia	MR Egger	0.56076916872565	2	0.755493134732067
LINC00092	Acute Lymphoblastic Leukemia	Inverse variance weighted	7.49053638245204	6	0.277851755357421			TNFAIP3	Acute lymphocytic leukaemia	Inverse variance weighted	2.20049863987678	3	0.531850161382421
LINC00526	Acute Lymphoblastic Leukemia	MR Egger	1.78205810941458	6	0.938612110532673			S100A11	Acute lymphocytic leukaemia	MR Egger	8.27940789767948	4	0.0818629747960593
LINC00526	Acute Lymphoblastic Leukemia	Inverse variance weighted	3.46700964213011	7	0.838707334459357			S100A11	Acute lymphocytic leukaemia	Inverse variance weighted	8.40363419475948	5	0.135348893680506
LINC00565	Acute Lymphoblastic Leukemia	MR Egger	35.9704828247908	32	0.287813976729233			DHX58	Acute lymphocytic leukaemia	MR Egger	1.53911417224426	4	0.819691028140578
LINC00565	Acute Lymphoblastic Leukemia	Inverse variance weighted	36.079549961091	33	0.326557544356824			DHX58	Acute lymphocytic leukaemia	Inverse variance weighted	1.91696041615239	5	0.860511731071314
LINC00665	Acute Lymphoblastic Leukemia	MR Egger	29.3004589356831	25	0.251551598014763			MED4	Acute lymphocytic leukaemia	MR Egger	11.898502031537	4	0.0181222080357339
LINC00665	Acute Lymphoblastic Leukemia	Inverse variance weighted	29.3376401395124	26	0.295953143364436			MED4	Acute lymphocytic leukaemia	Inverse variance weighted	13.9094543748026	5	0.0161949196265818
LINC00683	Acute Lymphoblastic Leukemia	MR Egger	5.70672129136267	9	0.76887402920089			EDA	Acute lymphocytic leukaemia	MR Egger	5.38778971313958	3	0.145506216967381
LINC00683	Acute Lymphoblastic Leukemia	Inverse variance weighted	8.20928318898895	10	0.608402643554787			EDA	Acute lymphocytic leukaemia	Inverse variance weighted	5.48516972317325	4	0.241036151763167
LL22NC03-86G7.1	Acute Lymphoblastic Leukemia	MR Egger	8.51229371333764	13	0.808699995629022			TNFRSF9	Acute lymphocytic leukaemia	MR Egger	1.04819474765647	1	0.305923219294744
LL22NC03-86G7.1	Acute Lymphoblastic Leukemia	Inverse variance weighted	8.55845531090249	14	0.858254351052447			TNFRSF9	Acute lymphocytic leukaemia	Inverse variance weighted	3.91237391377526	2	0.14139654544677
LMBR1	Acute Lymphoblastic Leukemia	MR Egger	17.1732225857526	22	0.753729329192578			IL17F	Acute lymphocytic leukaemia	MR Egger	3.65088610995273	3	0.301713480418177
LMBR1	Acute Lymphoblastic Leukemia	Inverse variance weighted	17.4211353788663	23	0.788087514787667			IL17F	Acute lymphocytic leukaemia	Inverse variance weighted	3.84614686153154	4	0.427227840717974
LMCD1	Acute Lymphoblastic Leukemia	MR Egger	19.6034571038373	24	0.719088575998035			PIK3C2A	Acute lymphocytic leukaemia	MR Egger	4.59734608671133	3	0.203769866046223
LMCD1	Acute Lymphoblastic Leukemia	Inverse variance weighted	20.7385773610161	25	0.707092199463814			PIK3C2A	Acute lymphocytic leukaemia	Inverse variance weighted	4.65712861708726	4	0.324320441135411
LMF2	Acute Lymphoblastic Leukemia	MR Egger	0.248140957545875	2	0.883317583549464			COPS2	Acute lymphocytic leukaemia	MR Egger	8.46206378057956	6	0.20616692942515
LMF2	Acute Lymphoblastic Leukemia	Inverse variance weighted	0.512118511897669	3	0.916221074374927			COPS2	Acute lymphocytic leukaemia	Inverse variance weighted	8.47023385481939	7	0.292958713750093
LMNA	Acute Lymphoblastic Leukemia	MR Egger	5.76489278957895	7	0.567454216065643			EEA1	Acute lymphocytic leukaemia	MR Egger	5.08404812890021	4	0.278781842071889
LMNA	Acute Lymphoblastic Leukemia	Inverse variance weighted	8.61259122059454	8	0.376023059559811			EEA1	Acute lymphocytic leukaemia	Inverse variance weighted	5.27974634868282	5	0.3827019371405
LMTK2	Acute Lymphoblastic Leukemia	MR Egger	3.02694793022091	8	0.93265504279893			NCOA2	Acute lymphocytic leukaemia	MR Egger	14.6867208273855	7	0.0402315564355382
LMTK2	Acute Lymphoblastic Leukemia	Inverse variance weighted	3.27528559360785	9	0.952373825302807			NCOA2	Acute lymphocytic leukaemia	Inverse variance weighted	15.079820574293	8	0.0576118559016046
LNX2	Acute Lymphoblastic Leukemia	MR Egger	2.71964069026024	9	0.974381829832079			BDNF	Acute lymphocytic leukaemia	MR Egger	16.986432328482	9	0.0489288688950829
LNX2	Acute Lymphoblastic Leukemia	Inverse variance weighted	4.81681740952871	10	0.903073934019524			BDNF	Acute lymphocytic leukaemia	Inverse variance weighted	16.9864731710453	10	0.0746638304271457
LOXL3	Acute Lymphoblastic Leukemia	MR Egger	5.4943660883794	6	0.482137901020847			IL1RAP	Acute lymphocytic leukaemia	MR Egger	9.76654939056308	9	0.369712969138697
LOXL3	Acute Lymphoblastic Leukemia	Inverse variance weighted	5.98550132346253	7	0.541443310502635			IL1RAP	Acute lymphocytic leukaemia	Inverse variance weighted	9.86564116658033	10	0.452359183624661
LPAR2	Acute Lymphoblastic Leukemia	MR Egger	21.7244550347215	32	0.914562658756321			IL15RA	Acute lymphocytic leukaemia	MR Egger	9.4224971402737	10	0.492530391272034
LPAR2	Acute Lymphoblastic Leukemia	Inverse variance weighted	24.5005117946877	33	0.857343695215571			IL15RA	Acute lymphocytic leukaemia	Inverse variance weighted	9.53295867848345	11	0.572820814107003
LPCAT2	Acute Lymphoblastic Leukemia	MR Egger	66.0892932647797	57	0.191730752283593			NCF4	Acute lymphocytic leukaemia	MR Egger	0.0117941769874154	1	0.913518968341826
LPCAT2	Acute Lymphoblastic Leukemia	Inverse variance weighted	69.8582016019554	58	0.136806906846149			NCF4	Acute lymphocytic leukaemia	Inverse variance weighted	0.746114855186725	2	0.688625685592564
LPIN2	Acute Lymphoblastic Leukemia	MR Egger	62.2339244315951	62	0.46777022287153			TNFSF11	Acute lymphocytic leukaemia	MR Egger	0.299912843001307	2	0.860745485604337
LPIN2	Acute Lymphoblastic Leukemia	Inverse variance weighted	62.6053208994488	63	0.490333559308072			TNFSF11	Acute lymphocytic leukaemia	Inverse variance weighted	2.67318559452115	3	0.444803371410501
LRFN2	Acute Lymphoblastic Leukemia	MR Egger	13.1450408872569	16	0.662124716978435			MAGI2	Acute lymphocytic leukaemia	MR Egger	4.28303160568943	9	0.891816342754439
LRFN2	Acute Lymphoblastic Leukemia	Inverse variance weighted	13.4145486725162	17	0.708022775169501			MAGI2	Acute lymphocytic leukaemia	Inverse variance weighted	4.44831121530195	10	0.92486545661216
LRP3	Acute Lymphoblastic Leukemia	MR Egger	20.7094476250016	28	0.837250875315726			PKP2	Acute lymphocytic leukaemia	MR Egger	3.93947482188798	3	0.268074361567542
LRP3	Acute Lymphoblastic Leukemia	Inverse variance weighted	23.4683847818083	29	0.754685235191381			PKP2	Acute lymphocytic leukaemia	Inverse variance weighted	4.0087021563694	4	0.404829421986562
LRRC32	Acute Lymphoblastic Leukemia	MR Egger	0.478880692625488	1	0.488929754751036			CA4	Acute lymphocytic leukaemia	MR Egger	0.829548636469872	5	0.975110477973771
LRRC32	Acute Lymphoblastic Leukemia	Inverse variance weighted	0.5314418570297	2	0.766653048654867			CA4	Acute lymphocytic leukaemia	Inverse variance weighted	1.21504909824433	6	0.976134866960487
LRRC33	Acute Lymphoblastic Leukemia	MR Egger	34.2282023234709	38	0.644549055314072			ITSN1	Acute lymphocytic leukaemia	MR Egger	4.10070586175954	1	0.0428653141148308
LRRC33	Acute Lymphoblastic Leukemia	Inverse variance weighted	34.6855289241741	39	0.666947421114303			ITSN1	Acute lymphocytic leukaemia	Inverse variance weighted	6.11433898383074	2	0.047020599224575
LRRC37A16P	Acute Lymphoblastic Leukemia	MR Egger	9.37736506684112	13	0.743883227695497			CST4	Acute lymphocytic leukaemia	MR Egger	10.0700313066486	13	0.688197874608271
LRRC37A16P	Acute Lymphoblastic Leukemia	Inverse variance weighted	9.94143462476276	14	0.766452599332753			CST4	Acute lymphocytic leukaemia	Inverse variance weighted	10.3788427068084	14	0.733994487467288
LRRC37A4P	Acute Lymphoblastic Leukemia	MR Egger	35.0463709544993	39	0.650814219442427			IL18R1	Acute lymphocytic leukaemia	MR Egger	12.2505871663766	18	0.834033674533244
LRRC37A4P	Acute Lymphoblastic Leukemia	Inverse variance weighted	36.726257728178	40	0.618431755101109			IL18R1	Acute lymphocytic leukaemia	Inverse variance weighted	12.4211143402359	19	0.866844909498503
LRRC4	Acute Lymphoblastic Leukemia	MR Egger	6.26227568623094	5	0.281528397138613			TLN2	Acute lymphocytic leukaemia	MR Egger	0.391895740439726	1	0.53130459967002
LRRC4	Acute Lymphoblastic Leukemia	Inverse variance weighted	6.40901386890955	6	0.378963927695221			TLN2	Acute lymphocytic leukaemia	Inverse variance weighted	1.43525767065512	2	0.487907795158986
LRRC6	Acute Lymphoblastic Leukemia	MR Egger	66.2712813819171	63	0.364777981262147			IGFBP6	Acute lymphocytic leukaemia	MR Egger	0.926310476058475	2	0.629294934419701
LRRC6	Acute Lymphoblastic Leukemia	Inverse variance weighted	68.1827686192536	64	0.33702239065136			IGFBP6	Acute lymphocytic leukaemia	Inverse variance weighted	1.65250915896689	3	0.647543181778676
LRRFIP2	Acute Lymphoblastic Leukemia	MR Egger	36.6673384813925	36	0.437734493239839			CBR3	Acute lymphocytic leukaemia	MR Egger	5.94510257017825	7	0.546173920086047
LRRFIP2	Acute Lymphoblastic Leukemia	Inverse variance weighted	36.6694247908166	37	0.484401127944416			CBR3	Acute lymphocytic leukaemia	Inverse variance weighted	5.95240117331981	8	0.652563783918314
LRRIQ3	Acute Lymphoblastic Leukemia	MR Egger	12.0837516104864	17	0.795039387157795			FLT3LG	Acute lymphocytic leukaemia	MR Egger	0.0616710268882033	1	0.803874045361592
LRRIQ3	Acute Lymphoblastic Leukemia	Inverse variance weighted	12.6988603654925	18	0.809143173598876			FLT3LG	Acute lymphocytic leukaemia	Inverse variance weighted	3.87935790596356	2	0.143750092908947
LRWD1	Acute Lymphoblastic Leukemia	MR Egger	32.0870862917475	40	0.809192502519321			HBEGF	Acute lymphocytic leukaemia	MR Egger	6.78406303805577	9	0.659590044749494
LRWD1	Acute Lymphoblastic Leukemia	Inverse variance weighted	33.0081321088798	41	0.808527711251913			HBEGF	Acute lymphocytic leukaemia	Inverse variance weighted	7.40788540376289	10	0.686458042105706
LSM14B	Acute Lymphoblastic Leukemia	MR Egger	1.24167475932045	2	0.53749416241625			C1QC	Acute lymphocytic leukaemia	MR Egger	14.5120734375583	13	0.338794169070701
LSM14B	Acute Lymphoblastic Leukemia	Inverse variance weighted	2.12151397546006	3	0.547572616369526			C1QC	Acute lymphocytic leukaemia	Inverse variance weighted	14.8437355178614	14	0.388919516168264
LSM7	Acute Lymphoblastic Leukemia	MR Egger	16.1670889139634	26	0.93209781657194			CNTFR	Acute lymphocytic leukaemia	MR Egger	7.38700424970876	10	0.688473551925099
LSM7	Acute Lymphoblastic Leukemia	Inverse variance weighted	17.1005004001198	27	0.928614324484399			CNTFR	Acute lymphocytic leukaemia	Inverse variance weighted	11.7236525176622	11	0.384769783366835
LSP1	Acute Lymphoblastic Leukemia	MR Egger	4.23557542199927	5	0.516021208276842			RAP1GDS1	Acute lymphocytic leukaemia	MR Egger	5.38228815069618	2	0.0678033228704499
LSP1	Acute Lymphoblastic Leukemia	Inverse variance weighted	5.85769282269195	6	0.439318931964506			RAP1GDS1	Acute lymphocytic leukaemia	Inverse variance weighted	5.38524909656476	3	0.145665377541669
LSR	Acute Lymphoblastic Leukemia	MR Egger	11.3579985033151	9	0.251965727411148			MTHFS	Acute lymphocytic leukaemia	MR Egger	6.75384875170747	6	0.344212263671812
LSR	Acute Lymphoblastic Leukemia	Inverse variance weighted	11.4315615301336	10	0.32489786716096			MTHFS	Acute lymphocytic leukaemia	Inverse variance weighted	9.25107185672847	7	0.235129277256773
LTBR	Acute Lymphoblastic Leukemia	MR Egger	12.8765279319426	16	0.681763343313866			RELT	Acute lymphocytic leukaemia	MR Egger	10.7558256243878	4	0.0294496894543161
LTBR	Acute Lymphoblastic Leukemia	Inverse variance weighted	12.9999913574648	17	0.736186614038441			RELT	Acute lymphocytic leukaemia	Inverse variance weighted	11.0290071742776	5	0.0508078802644729
LY86	Acute Lymphoblastic Leukemia	MR Egger	67.1774514808875	63	0.336019594891066			ADM	Acute lymphocytic leukaemia	MR Egger	0.278389546652706	1	0.597758712757662
LY86	Acute Lymphoblastic Leukemia	Inverse variance weighted	67.1912392981153	64	0.368344631265587			ADM	Acute lymphocytic leukaemia	Inverse variance weighted	0.705598376335914	2	0.702718293357394
LYG1	Acute Lymphoblastic Leukemia	MR Egger	31.9649088767647	29	0.321415732316961			S100A4	Acute lymphocytic leukaemia	MR Egger	11.4416565656556	5	0.0432933006736182
LYG1	Acute Lymphoblastic Leukemia	Inverse variance weighted	32.4837104424258	30	0.345379136213273			S100A4	Acute lymphocytic leukaemia	Inverse variance weighted	11.6841941937548	6	0.0693964425737191
LYRM4	Acute Lymphoblastic Leukemia	MR Egger	53.7179945578478	51	0.370598789428417			RNF43	Acute lymphocytic leukaemia	MR Egger	5.42046686781415	5	0.366745809227668
LYRM4	Acute Lymphoblastic Leukemia	Inverse variance weighted	53.7461626479204	52	0.407260915971529			RNF43	Acute lymphocytic leukaemia	Inverse variance weighted	6.22200012330197	6	0.398786709273475
MAGI2-AS3	Acute Lymphoblastic Leukemia	MR Egger	19.2867304205519	18	0.374370157497171			TNFRSF10D	Acute lymphocytic leukaemia	MR Egger	2.06654745303467	2	0.355840128402268
MAGI2-AS3	Acute Lymphoblastic Leukemia	Inverse variance weighted	19.3796417645464	19	0.432736489703033			TNFRSF10D	Acute lymphocytic leukaemia	Inverse variance weighted	2.32992505501674	3	0.506812314044594
MAK16	Acute Lymphoblastic Leukemia	MR Egger	1.57018017787228	4	0.814141410588614			EFNA2	Acute lymphocytic leukaemia	MR Egger	0.696396410750792	1	0.403997208156803
MAK16	Acute Lymphoblastic Leukemia	Inverse variance weighted	1.66138034339794	5	0.893728805038781			EFNA2	Acute lymphocytic leukaemia	Inverse variance weighted	2.68864900798789	2	0.260715760846904
MAML3	Acute Lymphoblastic Leukemia	MR Egger	18.5525014692854	22	0.67277433115324			IFNA10	Acute lymphocytic leukaemia	MR Egger	0.272729074141702	1	0.601506933735005
MAML3	Acute Lymphoblastic Leukemia	Inverse variance weighted	18.6094289339496	23	0.723646171595949			IFNA10	Acute lymphocytic leukaemia	Inverse variance weighted	1.7108866217704	2	0.425094700197493
MAN1B1	Acute Lymphoblastic Leukemia	MR Egger	19.7871843074593	24	0.708811924132745			EFNB2	Acute lymphocytic leukaemia	MR Egger	15.0646847791656	9	0.0891744519089595
MAN1B1	Acute Lymphoblastic Leukemia	Inverse variance weighted	19.9827892248576	25	0.747727543752964			EFNB2	Acute lymphocytic leukaemia	Inverse variance weighted	15.8529344034819	10	0.103920425669818
MAN2B1	Acute Lymphoblastic Leukemia	MR Egger	17.4382969796442	18	0.493189884465729			IL1R2	Acute lymphocytic leukaemia	MR Egger	14.7022092086017	18	0.682302796529399
MAN2B1	Acute Lymphoblastic Leukemia	Inverse variance weighted	17.934499706868	19	0.526817508701452			IL1R2	Acute lymphocytic leukaemia	Inverse variance weighted	17.1619962375945	19	0.578893843694385
MANEA	Acute Lymphoblastic Leukemia	MR Egger	43.5566032939876	56	0.887238390587204			AMIGO2	Acute lymphocytic leukaemia	MR Egger	11.3038260278938	11	0.418171966388076
MANEA	Acute Lymphoblastic Leukemia	Inverse variance weighted	43.7102392783693	57	0.90206250747227			AMIGO2	Acute lymphocytic leukaemia	Inverse variance weighted	12.2461137568481	12	0.426121925039743
MANSC1	Acute Lymphoblastic Leukemia	MR Egger	2.20184736633782	6	0.900230193351164			RXFP1	Acute lymphocytic leukaemia	MR Egger	2.0102879549625	2	0.365991936413253
MANSC1	Acute Lymphoblastic Leukemia	Inverse variance weighted	2.26127880686344	7	0.943976266644403			RXFP1	Acute lymphocytic leukaemia	Inverse variance weighted	5.77016931563346	3	0.12334339520153
MAP3K9	Acute Lymphoblastic Leukemia	MR Egger	4.84256768824739	11	0.938550334804962			CD93	Acute lymphocytic leukaemia	MR Egger	4.96223950719191	5	0.42050591389066
MAP3K9	Acute Lymphoblastic Leukemia	Inverse variance weighted	9.39038536047726	12	0.669274011319799			CD93	Acute lymphocytic leukaemia	Inverse variance weighted	5.71428016270808	6	0.455945322026141
MAP4K5	Acute Lymphoblastic Leukemia	MR Egger	9.46294	5	0.0919636921388206			IL36A	Acute lymphocytic leukaemia	MR Egger	3.70095683061157	2	0.157161959638072
MAP4K5	Acute Lymphoblastic Leukemia	Inverse variance weighted	10.1924229664461	6	0.11677907384547			IL36A	Acute lymphocytic leukaemia	Inverse variance weighted	4.00811155677377	3	0.260589559491793
MAP7D1	Acute Lymphoblastic Leukemia	MR Egger	29.2578403335507	21	0.107947552469467			ISG15	Acute lymphocytic leukaemia	MR Egger	4.33078672673165	8	0.826113945403656
MAP7D1	Acute Lymphoblastic Leukemia	Inverse variance weighted	29.7847324538751	22	0.12379109929772			ISG15	Acute lymphocytic leukaemia	Inverse variance weighted	4.40176545303992	9	0.883038539094659
MARC1	Acute Lymphoblastic Leukemia	MR Egger	28.7022649456915	38	0.862204335844891			EFNA3	Acute lymphocytic leukaemia	MR Egger	0.691947352922497	4	0.952318251469435
MARC1	Acute Lymphoblastic Leukemia	Inverse variance weighted	29.6159681639233	39	0.86103110897331			EFNA3	Acute lymphocytic leukaemia	Inverse variance weighted	0.69220355759174	5	0.983393820532909
2025-03-06	Acute Lymphoblastic Leukemia	MR Egger	12.0441370251464	18	0.844950388641346			YWHAB	Acute lymphocytic leukaemia	MR Egger	1.91502666132011	1	0.166405956417997
2025-03-06	Acute Lymphoblastic Leukemia	Inverse variance weighted	12.4266581846356	19	0.866587402578305			YWHAB	Acute lymphocytic leukaemia	Inverse variance weighted	3.50297640390997	2	0.173515525065144
MARK4	Acute Lymphoblastic Leukemia	MR Egger	16.8629351641434	21	0.719380692617979			YWHAE	Acute lymphocytic leukaemia	MR Egger	0.00165558264557939	1	0.96754394936061
MARK4	Acute Lymphoblastic Leukemia	Inverse variance weighted	16.8650567053948	22	0.770765116969308			YWHAE	Acute lymphocytic leukaemia	Inverse variance weighted	0.89511224090593	2	0.639188343704369
MARVELD1	Acute Lymphoblastic Leukemia	MR Egger	0.282400751889165	2	0.86831530476546			ANXA5	Acute lymphocytic leukaemia	MR Egger	1.09381964163188	2	0.578735446221175
MARVELD1	Acute Lymphoblastic Leukemia	Inverse variance weighted	0.300393064000706	3	0.959954538627347			ANXA5	Acute lymphocytic leukaemia	Inverse variance weighted	1.26801690867075	3	0.736741420701173
MAVS	Acute Lymphoblastic Leukemia	MR Egger	3.80613216961724	7	0.801816876486043			SCP2D1	Acute lymphocytic leukaemia	MR Egger	8.09934	11	0.704378030712868
MAVS	Acute Lymphoblastic Leukemia	Inverse variance weighted	3.92362792055033	8	0.863947404537634			SCP2D1	Acute lymphocytic leukaemia	Inverse variance weighted	10.0689480461942	12	0.609911827479122
MAX	Acute Lymphoblastic Leukemia	MR Egger	16.0671122925336	15	0.377605404592355			PRDM1	Acute lymphocytic leukaemia	MR Egger	4.25569009700022	3	0.235145059142429
MAX	Acute Lymphoblastic Leukemia	Inverse variance weighted	16.8636928213932	16	0.394470072530445			PRDM1	Acute lymphocytic leukaemia	Inverse variance weighted	4.74363638593272	4	0.314627439790954
MBOAT2	Acute Lymphoblastic Leukemia	MR Egger	1.02637132749115	3	0.794871232671612			ANXA7	Acute lymphocytic leukaemia	MR Egger	0.797021614479637	1	0.371985352341779
MBOAT2	Acute Lymphoblastic Leukemia	Inverse variance weighted	2.36783899446143	4	0.668446911289022			ANXA7	Acute lymphocytic leukaemia	Inverse variance weighted	1.41218354436528	2	0.493569414632859
MBTPS1	Acute Lymphoblastic Leukemia	MR Egger	32.9601491503609	45	0.908577705911485			FOXJ2	Acute lymphocytic leukaemia	MR Egger	1.85968459929619	3	0.602033808491873
MBTPS1	Acute Lymphoblastic Leukemia	Inverse variance weighted	32.9721467442467	46	0.925295148715681			FOXJ2	Acute lymphocytic leukaemia	Inverse variance weighted	1.85982400561247	4	0.76152095015616
MCM3AP	Acute Lymphoblastic Leukemia	MR Egger	24.4983763707553	37	0.942883637447433			APBB1	Acute lymphocytic leukaemia	MR Egger	0.0646612173865058	1	0.799274846300314
MCM3AP	Acute Lymphoblastic Leukemia	Inverse variance weighted	25.2350043770805	38	0.944252753183686			APBB1	Acute lymphocytic leukaemia	Inverse variance weighted	1.85495223127567	2	0.395550776021168
MCM4	Acute Lymphoblastic Leukemia	MR Egger	2.18842536953818	5	0.822506083240861			RBP7	Acute lymphocytic leukaemia	MR Egger	0.95833121187202	3	0.811333093915382
MCM4	Acute Lymphoblastic Leukemia	Inverse variance weighted	4.07255870187376	6	0.666857731001888			RBP7	Acute lymphocytic leukaemia	Inverse variance weighted	3.74426417276861	4	0.441720722932004
MCTP1	Acute Lymphoblastic Leukemia	MR Egger	48.6107620624601	59	0.830654674977467			DDX46	Acute lymphocytic leukaemia	MR Egger	11.9916628285152	8	0.151576254693425
MCTP1	Acute Lymphoblastic Leukemia	Inverse variance weighted	48.6121785005265	60	0.853556386919151			DDX46	Acute lymphocytic leukaemia	Inverse variance weighted	11.9933976825437	9	0.213681768205038
MDM1	Acute Lymphoblastic Leukemia	MR Egger	23.624334336379	22	0.367224475404741			BHMT2	Acute lymphocytic leukaemia	MR Egger	4.53189104861136	5	0.47562789782774
MDM1	Acute Lymphoblastic Leukemia	Inverse variance weighted	25.3270180739619	23	0.333647644167303			BHMT2	Acute lymphocytic leukaemia	Inverse variance weighted	4.54372692144116	6	0.60351353683417
MDS2	Acute Lymphoblastic Leukemia	MR Egger	10.6833375145045	8	0.220295195542762			MYL6B	Acute lymphocytic leukaemia	MR Egger	0.906716692361166	1	0.340987080310466
MDS2	Acute Lymphoblastic Leukemia	Inverse variance weighted	10.6833813165483	9	0.298037282203506			MYL6B	Acute lymphocytic leukaemia	Inverse variance weighted	0.928714050278773	2	0.628539110139941
MED11	Acute Lymphoblastic Leukemia	MR Egger	1.80763197059652	2	0.405021152316174			MOCS3	Acute lymphocytic leukaemia	MR Egger	6.77533642316668	8	0.561054934727099
MED11	Acute Lymphoblastic Leukemia	Inverse variance weighted	1.90242300510714	3	0.592904024724637			MOCS3	Acute lymphocytic leukaemia	Inverse variance weighted	7.69530469565802	9	0.565119627663664
MED17	Acute Lymphoblastic Leukemia	MR Egger	5.98181189773221	7	0.54187469019411			SNX7	Acute lymphocytic leukaemia	MR Egger	7.14931771729358	4	0.128204744177501
MED17	Acute Lymphoblastic Leukemia	Inverse variance weighted	6.96222945300231	8	0.540713278033542			SNX7	Acute lymphocytic leukaemia	Inverse variance weighted	7.15998333216352	5	0.209011462413849
MED22	Acute Lymphoblastic Leukemia	MR Egger	21.1333723909992	24	0.630845189180891			DOK2	Acute lymphocytic leukaemia	MR Egger	0.0284438659617927	2	0.985878720978359
MED22	Acute Lymphoblastic Leukemia	Inverse variance weighted	21.2024899797809	25	0.681266011701619			DOK2	Acute lymphocytic leukaemia	Inverse variance weighted	0.27431889125391	3	0.964783753891913
MED4	Acute Lymphoblastic Leukemia	MR Egger	21.8410259714651	29	0.826712053613556			BLMH	Acute lymphocytic leukaemia	MR Egger	1.07160990578759	2	0.585198043645947
MED4	Acute Lymphoblastic Leukemia	Inverse variance weighted	25.2979088816672	30	0.710428692549011			BLMH	Acute lymphocytic leukaemia	Inverse variance weighted	1.07793930436481	3	0.782402114123356
MEGF9	Acute Lymphoblastic Leukemia	MR Egger	31.3074182391232	32	0.501436225105076			PTPN4	Acute lymphocytic leukaemia	MR Egger	4.85512349766338	4	0.302488323930265
MEGF9	Acute Lymphoblastic Leukemia	Inverse variance weighted	31.3186440088643	33	0.550947274789404			PTPN4	Acute lymphocytic leukaemia	Inverse variance weighted	5.06152471215315	5	0.408417904764692
MERTK	Acute Lymphoblastic Leukemia	MR Egger	65.3686601078182	54	0.138171985250459			NET1	Acute lymphocytic leukaemia	MR Egger	4.94013327923971	2	0.0845792224865249
MERTK	Acute Lymphoblastic Leukemia	Inverse variance weighted	66.4645492915373	55	0.138338730801761			NET1	Acute lymphocytic leukaemia	Inverse variance weighted	4.96354668991131	3	0.174485978581093
METTL13	Acute Lymphoblastic Leukemia	MR Egger	36.5162475227325	40	0.627878051807091			SRXN1	Acute lymphocytic leukaemia	MR Egger	2.92388131853007	5	0.711719926377277
METTL13	Acute Lymphoblastic Leukemia	Inverse variance weighted	37.4947965505783	41	0.627204975159619			SRXN1	Acute lymphocytic leukaemia	Inverse variance weighted	3.88711660270936	6	0.691949409867879
METTL22	Acute Lymphoblastic Leukemia	MR Egger	12.8257947039495	32	0.99898794610637			RAB6B	Acute lymphocytic leukaemia	MR Egger	0.758400561506794	3	0.859388953593338
METTL22	Acute Lymphoblastic Leukemia	Inverse variance weighted	13.7492031845196	33	0.998727619993736			RAB6B	Acute lymphocytic leukaemia	Inverse variance weighted	0.784377031799997	4	0.940530185994433
METTL2B	Acute Lymphoblastic Leukemia	MR Egger	11.9206851739902	16	0.749421391279129			PREP	Acute lymphocytic leukaemia	MR Egger	0.782463387231491	2	0.676223461228613
METTL2B	Acute Lymphoblastic Leukemia	Inverse variance weighted	13.0104301268404	17	0.73548752094318			PREP	Acute lymphocytic leukaemia	Inverse variance weighted	5.09706493641339	3	0.164825998193432
MFHAS1	Acute Lymphoblastic Leukemia	MR Egger	50.3177069258567	60	0.809130075638957			RAB14	Acute lymphocytic leukaemia	MR Egger	0.234654487721183	2	0.889294129497472
MFHAS1	Acute Lymphoblastic Leukemia	Inverse variance weighted	50.5658023316523	61	0.827243912283065			RAB14	Acute lymphocytic leukaemia	Inverse variance weighted	0.419746293045056	3	0.936133834796754
MFN2	Acute Lymphoblastic Leukemia	MR Egger	48.1423790411572	51	0.587853863629895			NFATC1	Acute lymphocytic leukaemia	MR Egger	5.40693156850759	5	0.368259119589818
MFN2	Acute Lymphoblastic Leukemia	Inverse variance weighted	48.2737346176426	52	0.621214942483756			NFATC1	Acute lymphocytic leukaemia	Inverse variance weighted	5.43136924524351	6	0.489790165955996
MFSD4	Acute Lymphoblastic Leukemia	MR Egger	0.894052919050271	2	0.639526986470557			RAB5C	Acute lymphocytic leukaemia	MR Egger	0.928231071908261	2	0.628690913866292
MFSD4	Acute Lymphoblastic Leukemia	Inverse variance weighted	0.991249076764142	3	0.803369410564701			RAB5C	Acute lymphocytic leukaemia	Inverse variance weighted	5.52277841206045	3	0.137282546128587
MFSD6L	Acute Lymphoblastic Leukemia	MR Egger	4.6303098401324	3	0.200957317919916			MBD1	Acute lymphocytic leukaemia	MR Egger	4.69103260876738	14	0.9896649835924
MFSD6L	Acute Lymphoblastic Leukemia	Inverse variance weighted	6.6359720125165	4	0.156422137782558			MBD1	Acute lymphocytic leukaemia	Inverse variance weighted	6.03125952780201	15	0.979217867170352
MGA	Acute Lymphoblastic Leukemia	MR Egger	2.66020257900632	3	0.447032869275806			HNRNPH1	Acute lymphocytic leukaemia	MR Egger	1.54919195609884	3	0.670964261930796
MGA	Acute Lymphoblastic Leukemia	Inverse variance weighted	3.82633799512876	4	0.430018302900836			HNRNPH1	Acute lymphocytic leukaemia	Inverse variance weighted	1.69783830374243	4	0.791110261587644
MGAT4B	Acute Lymphoblastic Leukemia	MR Egger	5.66555547932148	8	0.68463687227043			PPIL2	Acute lymphocytic leukaemia	MR Egger	5.62769171344954	6	0.466159717703255
MGAT4B	Acute Lymphoblastic Leukemia	Inverse variance weighted	5.9867792395344	9	0.741240752528456			PPIL2	Acute lymphocytic leukaemia	Inverse variance weighted	5.69145801114498	7	0.576201975685638
MGLL	Acute Lymphoblastic Leukemia	MR Egger	0.986539996964966	5	0.963644092767296			VPS29	Acute lymphocytic leukaemia	MR Egger	6.44416530674286	8	0.597607280191865
MGLL	Acute Lymphoblastic Leukemia	Inverse variance weighted	4.0374570830492	6	0.671607298719511			VPS29	Acute lymphocytic leukaemia	Inverse variance weighted	6.6104024941937	9	0.677608928243921
MICA	Acute Lymphoblastic Leukemia	MR Egger	37.0868723856058	38	0.511517510539408			UBE2E1	Acute lymphocytic leukaemia	MR Egger	0.0355379186206715	1	0.850472930167211
MICA	Acute Lymphoblastic Leukemia	Inverse variance weighted	38.5235501742797	39	0.491429722206786			UBE2E1	Acute lymphocytic leukaemia	Inverse variance weighted	1.09101245393859	2	0.579548326075454
MIEN1	Acute Lymphoblastic Leukemia	MR Egger	0.164638020560115	1	0.684921810480241			DYNLT1	Acute lymphocytic leukaemia	MR Egger	2.05476843436392	3	0.561117472038642
MIEN1	Acute Lymphoblastic Leukemia	Inverse variance weighted	0.877375298289383	2	0.644882177674508			DYNLT1	Acute lymphocytic leukaemia	Inverse variance weighted	2.3446763116751	4	0.672647354377115
MIOS	Acute Lymphoblastic Leukemia	MR Egger	0.581095652345383	4	0.965141046164926			RCVRN	Acute lymphocytic leukaemia	MR Egger	5.56085713743716	4	0.234431654044215
MIOS	Acute Lymphoblastic Leukemia	Inverse variance weighted	2.02318925991394	5	0.845927146358131			RCVRN	Acute lymphocytic leukaemia	Inverse variance weighted	5.94358877413926	5	0.311746740873845
MIR378I	Acute Lymphoblastic Leukemia	MR Egger	0.571540877125623	1	0.44964726176361			TRAPPC3	Acute lymphocytic leukaemia	MR Egger	4.90498002820435	5	0.427586386857918
MIR378I	Acute Lymphoblastic Leukemia	Inverse variance weighted	0.639734892842348	2	0.726245297106981			TRAPPC3	Acute lymphocytic leukaemia	Inverse variance weighted	4.95070324826659	6	0.550151212728299
MIR4420	Acute Lymphoblastic Leukemia	MR Egger	2.47872960380511	4	0.648448594403033			MSTN	Acute lymphocytic leukaemia	MR Egger	0.066577250447815	1	0.796387089961419
MIR4420	Acute Lymphoblastic Leukemia	Inverse variance weighted	4.85803267633139	5	0.433450792922375			MSTN	Acute lymphocytic leukaemia	Inverse variance weighted	2.43531429857961	2	0.295922658015131
MIS12	Acute Lymphoblastic Leukemia	MR Egger	35.4863740130452	28	0.156148558347413			FAM210A	Acute lymphocytic leukaemia	MR Egger	2.3054549261478	2	0.315774330951859
MIS12	Acute Lymphoblastic Leukemia	Inverse variance weighted	39.267643503596	29	0.0966425937988902			FAM210A	Acute lymphocytic leukaemia	Inverse variance weighted	2.31750940250093	3	0.509174871815977
MIS18BP1	Acute Lymphoblastic Leukemia	MR Egger	8.1761992145371	11	0.697438610995166			STAB1	Acute lymphocytic leukaemia	MR Egger	6.18318730050546	4	0.185879045362512
MIS18BP1	Acute Lymphoblastic Leukemia	Inverse variance weighted	8.18391484447092	12	0.770597929835116			STAB1	Acute lymphocytic leukaemia	Inverse variance weighted	7.43850215461943	5	0.190016788484504
MKKS	Acute Lymphoblastic Leukemia	MR Egger	34.3774132239605	43	0.823081032583876			KIAA0040	Acute lymphocytic leukaemia	MR Egger	1.01127884059538	2	0.603119805060187
MKKS	Acute Lymphoblastic Leukemia	Inverse variance weighted	34.4535336964108	44	0.848433922349816			KIAA0040	Acute lymphocytic leukaemia	Inverse variance weighted	2.97840268072404	3	0.394967058469947
MKNK1-AS1	Acute Lymphoblastic Leukemia	MR Egger	8.53490173612919	11	0.664736999582462			NCMAP	Acute lymphocytic leukaemia	MR Egger	12.8305672331209	14	0.539906280705596
MKNK1-AS1	Acute Lymphoblastic Leukemia	Inverse variance weighted	8.53524075299212	12	0.742030370556986			NCMAP	Acute lymphocytic leukaemia	Inverse variance weighted	15.2101096089906	15	0.436391215392905
MKNK1	Acute Lymphoblastic Leukemia	MR Egger	14.5754019441433	19	0.749175103593458			VOPP1	Acute lymphocytic leukaemia	MR Egger	32.222084107315	22	0.0736877795992554
MKNK1	Acute Lymphoblastic Leukemia	Inverse variance weighted	15.0868	20	0.771421583217738			VOPP1	Acute lymphocytic leukaemia	Inverse variance weighted	32.5167611158165	23	0.0898645226405791
MLKL	Acute Lymphoblastic Leukemia	MR Egger	33.1812500727838	39	0.731791552599722			ZNF526	Acute lymphocytic leukaemia	MR Egger	0.105953210412823	1	0.744799241491336
MLKL	Acute Lymphoblastic Leukemia	Inverse variance weighted	33.7029358474776	40	0.74829891058042			ZNF526	Acute lymphocytic leukaemia	Inverse variance weighted	4.62071903432162	2	0.0992255718504245
MLLT11	Acute Lymphoblastic Leukemia	MR Egger	9.22838285694073	13	0.755484313559258			SUMO3	Acute lymphocytic leukaemia	MR Egger	0.066625187036123	1	0.796315413949055
MLLT11	Acute Lymphoblastic Leukemia	Inverse variance weighted	9.35539345444748	14	0.807632627295563			SUMO3	Acute lymphocytic leukaemia	Inverse variance weighted	0.607126616463822	2	0.73818315458213
MLLT6	Acute Lymphoblastic Leukemia	MR Egger	1.86632224906184	2	0.393308446213483			FBXO3	Acute lymphocytic leukaemia	MR Egger	3.92024374783815	2	0.140841254999313
MLLT6	Acute Lymphoblastic Leukemia	Inverse variance weighted	2.0187901658271	3	0.568515909374077			FBXO3	Acute lymphocytic leukaemia	Inverse variance weighted	5.14762063071908	3	0.161301328141648
MMP14	Acute Lymphoblastic Leukemia	MR Egger	0.746498857287718	2	0.688493481429606			DUSP16	Acute lymphocytic leukaemia	MR Egger	0.0572354521441581	1	0.810920014939245
MMP14	Acute Lymphoblastic Leukemia	Inverse variance weighted	2.01889899821206	3	0.568493427468229			DUSP16	Acute lymphocytic leukaemia	Inverse variance weighted	2.4932819414599	2	0.287468792998072
MNT	Acute Lymphoblastic Leukemia	MR Egger	0.444191777495959	1	0.505106170884524			TMEM185A	Acute lymphocytic leukaemia	MR Egger	10.9706033211875	8	0.203370425789445
MNT	Acute Lymphoblastic Leukemia	Inverse variance weighted	0.961389954351553	2	0.618353500871583			TMEM185A	Acute lymphocytic leukaemia	Inverse variance weighted	11.0582461891781	9	0.271737584991594
MOAP1	Acute Lymphoblastic Leukemia	MR Egger	2.35289587322486	5	0.798467565191235			LHCGR	Acute lymphocytic leukaemia	MR Egger	4.50993321630645	8	0.808438499020036
MOAP1	Acute Lymphoblastic Leukemia	Inverse variance weighted	2.39972893157018	6	0.879516489382828			LHCGR	Acute lymphocytic leukaemia	Inverse variance weighted	4.52474148757846	9	0.873617202385679
MOB3C	Acute Lymphoblastic Leukemia	MR Egger	12.4084859575535	29	0.996931631619324			GSTA4	Acute lymphocytic leukaemia	MR Egger	7.88791477687023	9	0.545480082627494
MOB3C	Acute Lymphoblastic Leukemia	Inverse variance weighted	12.8214463339587	30	0.99739567359692			GSTA4	Acute lymphocytic leukaemia	Inverse variance weighted	8.21966526391846	10	0.607389918639423
MON1B	Acute Lymphoblastic Leukemia	MR Egger	41.2865948980987	59	0.961391545652319			DNAJC17	Acute lymphocytic leukaemia	MR Egger	0.918930049167066	1	0.337756063318767
MON1B	Acute Lymphoblastic Leukemia	Inverse variance weighted	44.3012831307081	60	0.935637510040715			DNAJC17	Acute lymphocytic leukaemia	Inverse variance weighted	2.58678744073048	2	0.274338174428825
MORC3	Acute Lymphoblastic Leukemia	MR Egger	14.5298698824185	23	0.910688172419663			MZF1	Acute lymphocytic leukaemia	MR Egger	2.99175122838399	6	0.809881425809095
MORC3	Acute Lymphoblastic Leukemia	Inverse variance weighted	14.6994952872095	24	0.929244179962681			MZF1	Acute lymphocytic leukaemia	Inverse variance weighted	4.06717714567884	7	0.772008225623769
MORN1	Acute Lymphoblastic Leukemia	MR Egger	9.22382053871639	10	0.511002239114891			RNF8	Acute lymphocytic leukaemia	MR Egger	6.44149221245656	5	0.265597307864216
MORN1	Acute Lymphoblastic Leukemia	Inverse variance weighted	9.22404924325011	11	0.601220044801766			RNF8	Acute lymphocytic leukaemia	Inverse variance weighted	6.95439282363736	6	0.325085543970856
MPC1	Acute Lymphoblastic Leukemia	MR Egger	28.6151166431623	31	0.589270829012013			SKIL	Acute lymphocytic leukaemia	MR Egger	1.76818889647951	2	0.413088076593992
MPC1	Acute Lymphoblastic Leukemia	Inverse variance weighted	28.6188705756979	32	0.638446352273687			SKIL	Acute lymphocytic leukaemia	Inverse variance weighted	2.62817916308495	3	0.452570778556577
MPC2	Acute Lymphoblastic Leukemia	MR Egger	0.324665552576622	3	0.955324728512838			CAPN2	Acute lymphocytic leukaemia	MR Egger	5.80304062335936	7	0.562926503063759
MPC2	Acute Lymphoblastic Leukemia	Inverse variance weighted	2.93134	4	0.569380864422358			CAPN2	Acute lymphocytic leukaemia	Inverse variance weighted	6.0598190306905	8	0.640531238264208
MPZL1	Acute Lymphoblastic Leukemia	MR Egger	29.1435679079555	43	0.947354873762894			AKT2	Acute lymphocytic leukaemia	MR Egger	9.60094395634149	6	0.142494478362213
MPZL1	Acute Lymphoblastic Leukemia	Inverse variance weighted	32.7354	44	0.8942026200748			AKT2	Acute lymphocytic leukaemia	Inverse variance weighted	9.68512988706936	7	0.207130024198468
MRGBP	Acute Lymphoblastic Leukemia	MR Egger	4.24247405562283	6	0.643900098475907			PLIN3	Acute lymphocytic leukaemia	MR Egger	3.23150022597113	2	0.198741535907082
MRGBP	Acute Lymphoblastic Leukemia	Inverse variance weighted	4.26803423570124	7	0.748439252849991			PLIN3	Acute lymphocytic leukaemia	Inverse variance weighted	3.27432749941819	3	0.351231791851456
MRPL34	Acute Lymphoblastic Leukemia	MR Egger	36.3312400390787	29	0.164113193052122			SEC13	Acute lymphocytic leukaemia	MR Egger	8.72359887614423	10	0.558520595026433
MRPL34	Acute Lymphoblastic Leukemia	Inverse variance weighted	36.4304093916791	30	0.19432199407062			SEC13	Acute lymphocytic leukaemia	Inverse variance weighted	14.7925291054404	11	0.192193442836292
MRPL35	Acute Lymphoblastic Leukemia	MR Egger	19.4336074703447	17	0.304218393915604			ZNF276	Acute lymphocytic leukaemia	MR Egger	12.937244849306	7	0.0736522509360669
MRPL35	Acute Lymphoblastic Leukemia	Inverse variance weighted	19.6055509322452	18	0.355458792057793			ZNF276	Acute lymphocytic leukaemia	Inverse variance weighted	13.3857824126543	8	0.0992474549386921
MRPL52	Acute Lymphoblastic Leukemia	MR Egger	29.1155655875589	25	0.25911391698816			C8G	Acute lymphocytic leukaemia	MR Egger	11.6855225061411	11	0.387739590903041
MRPL52	Acute Lymphoblastic Leukemia	Inverse variance weighted	29.1508639871003	26	0.30426634486862			C8G	Acute lymphocytic leukaemia	Inverse variance weighted	11.7956555095119	12	0.462227345433154
MRPL55	Acute Lymphoblastic Leukemia	MR Egger	13.3836975083229	12	0.341779484906697			CST6	Acute lymphocytic leukaemia	MR Egger	11.8118959625071	13	0.543125529317368
MRPL55	Acute Lymphoblastic Leukemia	Inverse variance weighted	14.6437031673941	13	0.330120390203169			CST6	Acute lymphocytic leukaemia	Inverse variance weighted	13.5453761948784	14	0.484099928289726
MRPS7	Acute Lymphoblastic Leukemia	MR Egger	41.417731803504	37	0.283903537044357			AZU1	Acute lymphocytic leukaemia	MR Egger	1.33687606103306	1	0.247585633339696
MRPS7	Acute Lymphoblastic Leukemia	Inverse variance weighted	41.5425025879815	38	0.319047890445082			AZU1	Acute lymphocytic leukaemia	Inverse variance weighted	1.46908370977774	2	0.479725192387735
MSANTD4	Acute Lymphoblastic Leukemia	MR Egger	3.30752036599685	13	0.996577927928799			CRLF1	Acute lymphocytic leukaemia	MR Egger	4.75158934069521	1	0.0292712472238847
MSANTD4	Acute Lymphoblastic Leukemia	Inverse variance weighted	6.30282512738932	14	0.958271912511357			CRLF1	Acute lymphocytic leukaemia	Inverse variance weighted	5.42222815737311	2	0.0664627207532424
MSH3	Acute Lymphoblastic Leukemia	MR Egger	50.9668793747144	52	0.514536114747674			ARHGAP5	Acute lymphocytic leukaemia	MR Egger	1.11029417642129	3	0.774589627710901
MSH3	Acute Lymphoblastic Leukemia	Inverse variance weighted	50.9669483071924	53	0.553706572872611			ARHGAP5	Acute lymphocytic leukaemia	Inverse variance weighted	2.74354125272736	4	0.601617239649259
MST1	Acute Lymphoblastic Leukemia	MR Egger	1.24666098902312	5	0.940323324404412			IGF2	Acute lymphocytic leukaemia	MR Egger	9.34103073462589	7	0.22908977974448
MST1	Acute Lymphoblastic Leukemia	Inverse variance weighted	1.32692034467325	6	0.970152555712804			IGF2	Acute lymphocytic leukaemia	Inverse variance weighted	10.1450742917984	8	0.254990935305071
MST1P2	Acute Lymphoblastic Leukemia	MR Egger	28.220368390306	41	0.93528501783818			S100A3	Acute lymphocytic leukaemia	MR Egger	0.0596307303881507	2	0.970624728113523
MST1P2	Acute Lymphoblastic Leukemia	Inverse variance weighted	32.7089755324735	42	0.847474591876304			S100A3	Acute lymphocytic leukaemia	Inverse variance weighted	2.61989800101775	3	0.454011844148022
MTERFD2	Acute Lymphoblastic Leukemia	MR Egger	8.67664171612847	6	0.192596726608741			CCDC134	Acute lymphocytic leukaemia	MR Egger	1.61388280680176	2	0.446220790541006
MTERFD2	Acute Lymphoblastic Leukemia	Inverse variance weighted	9.5156543460307	7	0.21772171613254			CCDC134	Acute lymphocytic leukaemia	Inverse variance weighted	1.89187902921616	3	0.595147928067204
MTHFD1L	Acute Lymphoblastic Leukemia	MR Egger	0.588291033515931	2	0.745168049114745			REG3A	Acute lymphocytic leukaemia	MR Egger	19.3636637639132	16	0.250256464388526
MTHFD1L	Acute Lymphoblastic Leukemia	Inverse variance weighted	0.603373383520753	3	0.895659681866715			REG3A	Acute lymphocytic leukaemia	Inverse variance weighted	19.412004454565	17	0.30540224300716
MTHFD2	Acute Lymphoblastic Leukemia	MR Egger	4.82642646386194	7	0.681135587845819			SCGN	Acute lymphocytic leukaemia	MR Egger	8.51408537180572	6	0.20280551460183
MTHFD2	Acute Lymphoblastic Leukemia	Inverse variance weighted	4.99566381048171	8	0.758039490968493			SCGN	Acute lymphocytic leukaemia	Inverse variance weighted	10.6477585379551	7	0.154738672711419
MTHFS	Acute Lymphoblastic Leukemia	MR Egger	39.9660469616697	42	0.560600695076028			VWC2	Acute lymphocytic leukaemia	MR Egger	5.05527501260645	11	0.928460122576185
MTHFS	Acute Lymphoblastic Leukemia	Inverse variance weighted	39.9922645390704	43	0.602500836792677			VWC2	Acute lymphocytic leukaemia	Inverse variance weighted	6.27116934598612	12	0.901800055303878
MTPN	Acute Lymphoblastic Leukemia	MR Egger	7.92486125554735	5	0.160425578138759			PRC1	Acute lymphocytic leukaemia	MR Egger	0.696166297453108	1	0.404074880038544
MTPN	Acute Lymphoblastic Leukemia	Inverse variance weighted	8.95357602064555	6	0.176205806118643			PRC1	Acute lymphocytic leukaemia	Inverse variance weighted	1.78975265986129	2	0.408658134295721
MTR	Acute Lymphoblastic Leukemia	MR Egger	1.40865655019824	1	0.235279541605999			AGO1	Acute lymphocytic leukaemia	MR Egger	0.000783529681056994	1	0.977668850602693
MTR	Acute Lymphoblastic Leukemia	Inverse variance weighted	1.44869084566651	2	0.48464170054172			AGO1	Acute lymphocytic leukaemia	Inverse variance weighted	0.322456076185154	2	0.851097966219525
MTRR	Acute Lymphoblastic Leukemia	MR Egger	50.2503343633459	40	0.128453854549185			MAD2L1	Acute lymphocytic leukaemia	MR Egger	0.0527647316398847	1	0.818320426426404
MTRR	Acute Lymphoblastic Leukemia	Inverse variance weighted	50.977	41	0.136627418023837			MAD2L1	Acute lymphocytic leukaemia	Inverse variance weighted	2.84722644505868	2	0.240842226300702
MUC20	Acute Lymphoblastic Leukemia	MR Egger	60.0060695140268	85	0.981827442751719			CUTC	Acute lymphocytic leukaemia	MR Egger	0.356613147459882	1	0.550393249995978
MUC20	Acute Lymphoblastic Leukemia	Inverse variance weighted	60.6083371418179	86	0.982825101140838			CUTC	Acute lymphocytic leukaemia	Inverse variance weighted	2.92789198111747	2	0.231321678263543
MVB12A	Acute Lymphoblastic Leukemia	MR Egger	19.0132100217279	22	0.644512559020097			TXNL4B	Acute lymphocytic leukaemia	MR Egger	2.32545298311671	5	0.802521379318372
MVB12A	Acute Lymphoblastic Leukemia	Inverse variance weighted	22.0795435806012	23	0.515454106632594			TXNL4B	Acute lymphocytic leukaemia	Inverse variance weighted	3.65577436149449	6	0.723142352178522
MVK	Acute Lymphoblastic Leukemia	MR Egger	0.324522014106748	2	0.850219262352866			S100A10	Acute lymphocytic leukaemia	MR Egger	1.75406141775647	2	0.416016353215956
MVK	Acute Lymphoblastic Leukemia	Inverse variance weighted	1.61448941994315	3	0.656108921824379			S100A10	Acute lymphocytic leukaemia	Inverse variance weighted	4.54741001417527	3	0.208100206500656
MX1	Acute Lymphoblastic Leukemia	MR Egger	28.4890913172195	39	0.892587207494776			CRADD	Acute lymphocytic leukaemia	MR Egger	2.08362610738987	1	0.148886121861807
MX1	Acute Lymphoblastic Leukemia	Inverse variance weighted	28.5654009831797	40	0.911358892383271			CRADD	Acute lymphocytic leukaemia	Inverse variance weighted	2.14490058535038	2	0.342169075020723
MYBPC3	Acute Lymphoblastic Leukemia	MR Egger	28.8499451611282	37	0.828551543135159			FTL	Acute lymphocytic leukaemia	MR Egger	2.73045791912854	4	0.603895487082455
MYBPC3	Acute Lymphoblastic Leukemia	Inverse variance weighted	28.8499581432306	38	0.857661030609057			FTL	Acute lymphocytic leukaemia	Inverse variance weighted	2.83621417797751	5	0.725219053008129
MYBPH	Acute Lymphoblastic Leukemia	MR Egger	27.4313478758567	27	0.440718425111819			GBP1	Acute lymphocytic leukaemia	MR Egger	10.4052981901532	11	0.494340418435204
MYBPH	Acute Lymphoblastic Leukemia	Inverse variance weighted	33.5029665891285	28	0.217717811520018			GBP1	Acute lymphocytic leukaemia	Inverse variance weighted	10.4803650756246	12	0.57389547166915
MYCBPAP	Acute Lymphoblastic Leukemia	MR Egger	9.58724676945737	18	0.944549106660786			RBBP4	Acute lymphocytic leukaemia	MR Egger	0.0548844354389605	2	0.972930899095416
MYCBPAP	Acute Lymphoblastic Leukemia	Inverse variance weighted	9.78374694186011	19	0.958080020098246			RBBP4	Acute lymphocytic leukaemia	Inverse variance weighted	1.95743450644785	3	0.581288165930566
MYCL1	Acute Lymphoblastic Leukemia	MR Egger	2.34345478059018	2	0.309831279205144			SDF2	Acute lymphocytic leukaemia	MR Egger	28.5179334820754	15	0.0185428900109453
MYCL1	Acute Lymphoblastic Leukemia	Inverse variance weighted	2.3989309252126	3	0.493833661674513			SDF2	Acute lymphocytic leukaemia	Inverse variance weighted	28.5226767348893	16	0.0273606188121247
MYH10	Acute Lymphoblastic Leukemia	MR Egger	0.00302966373421153	2	0.998486314911555			KNG1	Acute lymphocytic leukaemia	MR Egger	2.98265143567617	5	0.70266062082065
MYH10	Acute Lymphoblastic Leukemia	Inverse variance weighted	1.91484666606089	3	0.590267292262304			KNG1	Acute lymphocytic leukaemia	Inverse variance weighted	3.00105939871995	6	0.808713852913336
MYO19	Acute Lymphoblastic Leukemia	MR Egger	2.61116420114382	3	0.455535679044667			IFNG	Acute lymphocytic leukaemia	MR Egger	2.39010664795258	1	0.122105298289915
MYO19	Acute Lymphoblastic Leukemia	Inverse variance weighted	2.68393137628636	4	0.612029329413585			IFNG	Acute lymphocytic leukaemia	Inverse variance weighted	4.86625038620972	2	0.0877621299531751
MYO1E	Acute Lymphoblastic Leukemia	MR Egger	2.35938262993227	4	0.669979578554826			SCG5	Acute lymphocytic leukaemia	MR Egger	13.0307457321439	8	0.110796117592465
MYO1E	Acute Lymphoblastic Leukemia	Inverse variance weighted	2.5549552148779	5	0.768196915940736			SCG5	Acute lymphocytic leukaemia	Inverse variance weighted	13.4259090988441	9	0.144262161277656
MYO5A	Acute Lymphoblastic Leukemia	MR Egger	14.9056274754503	19	0.728576276058838			APOA5	Acute lymphocytic leukaemia	MR Egger	13.7069894762455	16	0.620532257897396
MYO5A	Acute Lymphoblastic Leukemia	Inverse variance weighted	14.9782845246328	20	0.777648825811572			APOA5	Acute lymphocytic leukaemia	Inverse variance weighted	14.1609435299629	17	0.655678399400407
MYO5B	Acute Lymphoblastic Leukemia	MR Egger	11.0690261323092	10	0.352165587877044			APOC1	Acute lymphocytic leukaemia	MR Egger	6.69153499422167	6	0.350317973342426
MYO5B	Acute Lymphoblastic Leukemia	Inverse variance weighted	11.2016027067309	11	0.426531563908663			APOC1	Acute lymphocytic leukaemia	Inverse variance weighted	7.18249132069201	7	0.410129650996775
MYO7A	Acute Lymphoblastic Leukemia	MR Egger	10.689536145985	8	0.219918497733008			BPIFB1	Acute lymphocytic leukaemia	MR Egger	37.6503619356443	22	0.0200469117323471
MYO7A	Acute Lymphoblastic Leukemia	Inverse variance weighted	10.8501954774723	9	0.286117258645719			BPIFB1	Acute lymphocytic leukaemia	Inverse variance weighted	37.7073764323998	23	0.0273742740127364
MYPOP	Acute Lymphoblastic Leukemia	MR Egger	4.92612847991162	3	0.177286989257563			BMPER	Acute lymphocytic leukaemia	MR Egger	0.612631073082322	1	0.433798881026054
MYPOP	Acute Lymphoblastic Leukemia	Inverse variance weighted	5.78201217660328	4	0.216029927082687			BMPER	Acute lymphocytic leukaemia	Inverse variance weighted	0.631091386430266	2	0.729390742070788
N6AMT2	Acute Lymphoblastic Leukemia	MR Egger	1.85163218001805	1	0.173593681436022			BOLA1	Acute lymphocytic leukaemia	MR Egger	14.7788250786243	14	0.393439091575778
N6AMT2	Acute Lymphoblastic Leukemia	Inverse variance weighted	2.76891285199516	2	0.250459906290075			BOLA1	Acute lymphocytic leukaemia	Inverse variance weighted	16.0601178295473	15	0.378067475117521
NAIP	Acute Lymphoblastic Leukemia	MR Egger	4.67428092139247	5	0.456909043240682			BRD2	Acute lymphocytic leukaemia	MR Egger	1.59650725798411	2	0.450114344776587
NAIP	Acute Lymphoblastic Leukemia	Inverse variance weighted	6.06168763087646	6	0.416315419261665			BRD2	Acute lymphocytic leukaemia	Inverse variance weighted	1.95810616000045	3	0.581147298099843
NANOS1	Acute Lymphoblastic Leukemia	MR Egger	13.3937264009036	18	0.767672359886374			GKN1	Acute lymphocytic leukaemia	MR Egger	0.00988665859815259	1	0.920795531941471
NANOS1	Acute Lymphoblastic Leukemia	Inverse variance weighted	15.863606921759	19	0.66635804950557			GKN1	Acute lymphocytic leukaemia	Inverse variance weighted	2.52106577152275	2	0.283502911574964
NAPG	Acute Lymphoblastic Leukemia	MR Egger	30.300113442995	20	0.0651345076882758			CPB1	Acute lymphocytic leukaemia	MR Egger	16.025715704639	22	0.814607454425716
NAPG	Acute Lymphoblastic Leukemia	Inverse variance weighted	30.4405024203488	21	0.0834870330286773			CPB1	Acute lymphocytic leukaemia	Inverse variance weighted	16.2412959828785	23	0.84474612936592
NAPSA	Acute Lymphoblastic Leukemia	MR Egger	3.7432078690634	4	0.44187280992798			CTSE	Acute lymphocytic leukaemia	MR Egger	5.90039864785514	10	0.82356071565061
NAPSA	Acute Lymphoblastic Leukemia	Inverse variance weighted	4.01748138541557	5	0.546901812867001			CTSE	Acute lymphocytic leukaemia	Inverse variance weighted	6.42128037820254	11	0.843829920424521
NAPSB	Acute Lymphoblastic Leukemia	MR Egger	68.7803826342533	76	0.709074863847576			EDN3	Acute lymphocytic leukaemia	MR Egger	3.06340394537729	2	0.216167442966897
NAPSB	Acute Lymphoblastic Leukemia	Inverse variance weighted	69.0933228000036	77	0.727784224418836			EDN3	Acute lymphocytic leukaemia	Inverse variance weighted	4.55876022233889	3	0.207108513599267
NAT6	Acute Lymphoblastic Leukemia	MR Egger	4.34310135870802	8	0.82491735396648			KL	Acute lymphocytic leukaemia	MR Egger	18.2408117737124	27	0.895987202105391
NAT6	Acute Lymphoblastic Leukemia	Inverse variance weighted	8.11171260736428	9	0.522928725032747			KL	Acute lymphocytic leukaemia	Inverse variance weighted	18.2419350205802	28	0.919891073422399
NBPF1	Acute Lymphoblastic Leukemia	MR Egger	25.1734858805087	26	0.509172615295848			FABP2	Acute lymphocytic leukaemia	MR Egger	5.04566862904767	10	0.888106488057262
NBPF1	Acute Lymphoblastic Leukemia	Inverse variance weighted	28.0938226188337	27	0.406148255688786			FABP2	Acute lymphocytic leukaemia	Inverse variance weighted	7.85116124820953	11	0.726571336840676
NBPF2P	Acute Lymphoblastic Leukemia	MR Egger	26.9340571619009	28	0.521840233383956			FABP4	Acute lymphocytic leukaemia	MR Egger	1.21518172905467	1	0.270308316460839
NBPF2P	Acute Lymphoblastic Leukemia	Inverse variance weighted	27.0264042101765	29	0.570280461116553			FABP4	Acute lymphocytic leukaemia	Inverse variance weighted	1.23279277630118	2	0.539886477621929
NCAPD2	Acute Lymphoblastic Leukemia	MR Egger	33.4361935272578	33	0.446090573234966			NRP2	Acute lymphocytic leukaemia	MR Egger	7.73008496394667	19	0.989186700599785
NCAPD2	Acute Lymphoblastic Leukemia	Inverse variance weighted	34.3066198334238	34	0.453046421715223			NRP2	Acute lymphocytic leukaemia	Inverse variance weighted	7.97957392148031	20	0.992002027672325
NCEH1	Acute Lymphoblastic Leukemia	MR Egger	11.8562205938615	12	0.457294843005127			FCGR3A	Acute lymphocytic leukaemia	MR Egger	11.5053458773309	15	0.716018323330428
NCEH1	Acute Lymphoblastic Leukemia	Inverse variance weighted	12.4339613077372	13	0.492419976467163			FCGR3A	Acute lymphocytic leukaemia	Inverse variance weighted	11.8776885437793	16	0.752355714297901
NCF1C	Acute Lymphoblastic Leukemia	MR Egger	7.61672268693396	14	0.908323497073842			GAL	Acute lymphocytic leukaemia	MR Egger	4.36596252465723	3	0.224562279555277
NCF1C	Acute Lymphoblastic Leukemia	Inverse variance weighted	11.8461140303732	15	0.690637744747435			GAL	Acute lymphocytic leukaemia	Inverse variance weighted	5.02567009349998	4	0.284673710602062
NCKAP1L	Acute Lymphoblastic Leukemia	MR Egger	1.77594445503899	6	0.939108963672467			GAS6	Acute lymphocytic leukaemia	MR Egger	15.5827035851524	13	0.272399560130441
NCKAP1L	Acute Lymphoblastic Leukemia	Inverse variance weighted	1.89128862519786	7	0.965611376480013			GAS6	Acute lymphocytic leukaemia	Inverse variance weighted	16.1653	14	0.303384584878776
NDUFAF3	Acute Lymphoblastic Leukemia	MR Egger	2.87284049653301	3	0.411649012112189			UNC5B	Acute lymphocytic leukaemia	MR Egger	12.1191805126768	8	0.145965034236489
NDUFAF3	Acute Lymphoblastic Leukemia	Inverse variance weighted	2.87373396168818	4	0.579173153000505			UNC5B	Acute lymphocytic leukaemia	Inverse variance weighted	12.6600418083314	9	0.178601911584454
NDUFAF5	Acute Lymphoblastic Leukemia	MR Egger	16.9943655937622	24	0.848902253451836			GSTM1	Acute lymphocytic leukaemia	MR Egger	8.0292490770439	13	0.84168953855095
NDUFAF5	Acute Lymphoblastic Leukemia	Inverse variance weighted	21.2722109566681	25	0.677336989689363			GSTM1	Acute lymphocytic leukaemia	Inverse variance weighted	8.96929732033052	14	0.833012348115958
NDUFC1	Acute Lymphoblastic Leukemia	MR Egger	2.13147904008957	3	0.545570636988368			IFNA4	Acute lymphocytic leukaemia	MR Egger	0.185165353545535	1	0.666971288418161
NDUFC1	Acute Lymphoblastic Leukemia	Inverse variance weighted	2.13205030861579	4	0.711486661730226			IFNA4	Acute lymphocytic leukaemia	Inverse variance weighted	0.33756830393703	2	0.84469120864481
NDUFS2	Acute Lymphoblastic Leukemia	MR Egger	5.60281902992757	13	0.95942246759413			LCAT	Acute lymphocytic leukaemia	MR Egger	7.20017355380128	3	0.0657839765393218
NDUFS2	Acute Lymphoblastic Leukemia	Inverse variance weighted	5.63260701105893	14	0.974919635162825			LCAT	Acute lymphocytic leukaemia	Inverse variance weighted	8.07273143203366	4	0.0889499895693477
NEDD9	Acute Lymphoblastic Leukemia	MR Egger	0.900277336590605	7	0.99628091245799			LDHA	Acute lymphocytic leukaemia	MR Egger	2.32793593985735	4	0.675687619967182
NEDD9	Acute Lymphoblastic Leukemia	Inverse variance weighted	1.09485021454974	8	0.997575160567784			LDHA	Acute lymphocytic leukaemia	Inverse variance weighted	2.52119355977149	5	0.773299951295284
NEFH	Acute Lymphoblastic Leukemia	MR Egger	21.1315138639635	19	0.329579781547406			LYG2	Acute lymphocytic leukaemia	MR Egger	1.6332793989822	4	0.80279874614691
NEFH	Acute Lymphoblastic Leukemia	Inverse variance weighted	21.3378084786124	20	0.377494750830278			LYG2	Acute lymphocytic leukaemia	Inverse variance weighted	1.63329573390269	5	0.897193866142616
NELFCD	Acute Lymphoblastic Leukemia	MR Egger	18.6536980447258	29	0.929845996489217			MAPK10	Acute lymphocytic leukaemia	MR Egger	0.904561408404145	3	0.824326898922772
NELFCD	Acute Lymphoblastic Leukemia	Inverse variance weighted	19.0357715800144	30	0.939255920908395			MAPK10	Acute lymphocytic leukaemia	Inverse variance weighted	1.35391283010301	4	0.85216430680729
NELL2	Acute Lymphoblastic Leukemia	MR Egger	26.3117812287524	27	0.501353223133673			MMP20	Acute lymphocytic leukaemia	MR Egger	9.11272117247176	5	0.104651678927141
NELL2	Acute Lymphoblastic Leukemia	Inverse variance weighted	28.2451135441504	28	0.451516700772371			MMP20	Acute lymphocytic leukaemia	Inverse variance weighted	9.35709834222147	6	0.154468624930732
NEO1	Acute Lymphoblastic Leukemia	MR Egger	34.7919874128722	36	0.525952669504571			NEU1	Acute lymphocytic leukaemia	MR Egger	3.41328833142411	5	0.636546877661456
NEO1	Acute Lymphoblastic Leukemia	Inverse variance weighted	36.350527400177	37	0.499296281209113			NEU1	Acute lymphocytic leukaemia	Inverse variance weighted	4.01965363893188	6	0.67401660674319
NFRKB	Acute Lymphoblastic Leukemia	MR Egger	9.93639376358502	17	0.906256397228817			LOXL3	Acute lymphocytic leukaemia	MR Egger	25.7856253221015	15	0.0403372516798786
NFRKB	Acute Lymphoblastic Leukemia	Inverse variance weighted	10.043159104171	18	0.930488570645866			LOXL3	Acute lymphocytic leukaemia	Inverse variance weighted	26.6031611254425	16	0.0461102863893001
NFYA	Acute Lymphoblastic Leukemia	MR Egger	4.41510490322959	9	0.882032593561777			OPTC	Acute lymphocytic leukaemia	MR Egger	3.89086808370183	3	0.273492096947754
NFYA	Acute Lymphoblastic Leukemia	Inverse variance weighted	4.61162727792864	10	0.915568193978623			OPTC	Acute lymphocytic leukaemia	Inverse variance weighted	4.79650681621769	4	0.308821508315906
NHSL1	Acute Lymphoblastic Leukemia	MR Egger	6.28888793096265	4	0.178587726816193			OTC	Acute lymphocytic leukaemia	MR Egger	3.20083427252156	8	0.921129009212515
NHSL1	Acute Lymphoblastic Leukemia	Inverse variance weighted	7.61599125468574	5	0.178707629063959			OTC	Acute lymphocytic leukaemia	Inverse variance weighted	3.35146671541037	9	0.948717673145173
NINJ1	Acute Lymphoblastic Leukemia	MR Egger	51.1898291901354	42	0.156425193124486			OTOR	Acute lymphocytic leukaemia	MR Egger	3.84512735138155	6	0.697625473722868
NINJ1	Acute Lymphoblastic Leukemia	Inverse variance weighted	51.1912827252612	43	0.183102251844751			OTOR	Acute lymphocytic leukaemia	Inverse variance weighted	4.11803173296643	7	0.766086555698217
NIPA1	Acute Lymphoblastic Leukemia	MR Egger	7.46391303608507	9	0.588936431825675			PNP	Acute lymphocytic leukaemia	MR Egger	0.0102882878141532	1	0.919208172199084
NIPA1	Acute Lymphoblastic Leukemia	Inverse variance weighted	9.68666736730625	10	0.468399614076029			PNP	Acute lymphocytic leukaemia	Inverse variance weighted	0.890765581438345	2	0.640579021390428
NIPAL3	Acute Lymphoblastic Leukemia	MR Egger	4.93768736989506	15	0.992640969740921			PCSK2	Acute lymphocytic leukaemia	MR Egger	4.93378550734282	3	0.176710401493733
NIPAL3	Acute Lymphoblastic Leukemia	Inverse variance weighted	6.06820878045472	16	0.98734180937383			PCSK2	Acute lymphocytic leukaemia	Inverse variance weighted	4.93503978154283	4	0.294027999072534
NIPSNAP3A	Acute Lymphoblastic Leukemia	MR Egger	27.5306177251882	39	0.915583535952881			GM2A	Acute lymphocytic leukaemia	MR Egger	7.74151572957199	4	0.101519100011899
NIPSNAP3A	Acute Lymphoblastic Leukemia	Inverse variance weighted	27.9488432768399	40	0.92453522249165			GM2A	Acute lymphocytic leukaemia	Inverse variance weighted	7.89894701310148	5	0.161893495407553
NLRC4	Acute Lymphoblastic Leukemia	MR Egger	13.2633043067154	19	0.824823098671712			SERPINB4	Acute lymphocytic leukaemia	MR Egger	1.14845464985418	4	0.886510100034619
NLRC4	Acute Lymphoblastic Leukemia	Inverse variance weighted	14.6770390748039	20	0.794579617892034			SERPINB4	Acute lymphocytic leukaemia	Inverse variance weighted	2.00720442227362	5	0.84814727114368
NLRP2	Acute Lymphoblastic Leukemia	MR Egger	36.6927267332368	29	0.154247949572411			NRG1	Acute lymphocytic leukaemia	MR Egger	7.30831208856489	5	0.198701841597246
NLRP2	Acute Lymphoblastic Leukemia	Inverse variance weighted	40.6706671884455	30	0.0925144297038476			NRG1	Acute lymphocytic leukaemia	Inverse variance weighted	8.13460785754448	6	0.228406577059207
NMB	Acute Lymphoblastic Leukemia	MR Egger	25.9687501863661	27	0.520335363430479			SORD	Acute lymphocytic leukaemia	MR Egger	4.54848361087899	5	0.473422821867911
NMB	Acute Lymphoblastic Leukemia	Inverse variance weighted	27.7108769448173	28	0.47984531197524			SORD	Acute lymphocytic leukaemia	Inverse variance weighted	6.75694470025174	6	0.343910921642638
NME8	Acute Lymphoblastic Leukemia	MR Egger	13.0590513982533	31	0.998052362155268			TIMD4	Acute lymphocytic leukaemia	MR Egger	18.9685245418855	33	0.975806537685779
NME8	Acute Lymphoblastic Leukemia	Inverse variance weighted	13.1785743775277	32	0.998670154685892			TIMD4	Acute lymphocytic leukaemia	Inverse variance weighted	22.8998093929102	34	0.925848630378652
NNT	Acute Lymphoblastic Leukemia	MR Egger	31.7955644692211	45	0.931257383123201			NT5E	Acute lymphocytic leukaemia	MR Egger	24.5880757385832	17	0.104316839138923
NNT	Acute Lymphoblastic Leukemia	Inverse variance weighted	32.3427634920539	46	0.936276660701812			NT5E	Acute lymphocytic leukaemia	Inverse variance weighted	25.2178722361395	18	0.119031568320851
NOD2	Acute Lymphoblastic Leukemia	MR Egger	65.6947847253961	69	0.590550883717078			AMBP	Acute lymphocytic leukaemia	MR Egger	5.18558962239442	7	0.637326349537763
NOD2	Acute Lymphoblastic Leukemia	Inverse variance weighted	68.6517529514015	70	0.523211329585902			AMBP	Acute lymphocytic leukaemia	Inverse variance weighted	5.69060572069105	8	0.681843268828135
NOL9	Acute Lymphoblastic Leukemia	MR Egger	3.73398027198284	6	0.712623431036105			ADAM15	Acute lymphocytic leukaemia	MR Egger	0.526075980743851	3	0.913126401305276
NOL9	Acute Lymphoblastic Leukemia	Inverse variance weighted	3.89550585178126	7	0.791731424825928			ADAM15	Acute lymphocytic leukaemia	Inverse variance weighted	3.26516991992155	4	0.514469646291598
NOM1	Acute Lymphoblastic Leukemia	MR Egger	13.9377	16	0.603353845310532			DPP4	Acute lymphocytic leukaemia	MR Egger	0.25390522605306	1	0.614338612608892
NOM1	Acute Lymphoblastic Leukemia	Inverse variance weighted	14.229364036455	17	0.650804837961913			DPP4	Acute lymphocytic leukaemia	Inverse variance weighted	4.27211353196162	2	0.118119699517939
NPC2	Acute Lymphoblastic Leukemia	MR Egger	17.3912416491315	16	0.360727071426448			CD8A	Acute lymphocytic leukaemia	MR Egger	7.85329220540754	15	0.929529518367555
NPC2	Acute Lymphoblastic Leukemia	Inverse variance weighted	17.6792582012993	17	0.409340311961057			CD8A	Acute lymphocytic leukaemia	Inverse variance weighted	8.58486748572075	16	0.929520666208263
NRBP1	Acute Lymphoblastic Leukemia	MR Egger	16.9503823050463	19	0.593229422716103			COL9A1	Acute lymphocytic leukaemia	MR Egger	4.05099912368366	1	0.0441452100454277
NRBP1	Acute Lymphoblastic Leukemia	Inverse variance weighted	18.5668492686748	20	0.550120070504773			COL9A1	Acute lymphocytic leukaemia	Inverse variance weighted	4.19997471060139	2	0.122457976687485
NRDE2	Acute Lymphoblastic Leukemia	MR Egger	15.5418980479431	18	0.624484353153813			CTHRC1	Acute lymphocytic leukaemia	MR Egger	19.4933148703515	8	0.0124327803168417
NRDE2	Acute Lymphoblastic Leukemia	Inverse variance weighted	15.6231329405954	19	0.682255849311649			CTHRC1	Acute lymphocytic leukaemia	Inverse variance weighted	20.3864718362269	9	0.015671522245225
NRG1	Acute Lymphoblastic Leukemia	MR Egger	57.2683365798946	71	0.880878112197316			CFHR1	Acute lymphocytic leukaemia	MR Egger	15.2877156515239	18	0.642125952991975
NRG1	Acute Lymphoblastic Leukemia	Inverse variance weighted	57.3094507483503	72	0.896606580641717			CFHR1	Acute lymphocytic leukaemia	Inverse variance weighted	16.7246503556294	19	0.608516008119362
NRP1	Acute Lymphoblastic Leukemia	MR Egger	28.3413983316515	32	0.652376738038897			HEXB	Acute lymphocytic leukaemia	MR Egger	31.8836	24	0.129905202801116
NRP1	Acute Lymphoblastic Leukemia	Inverse variance weighted	31.0794779474284	33	0.56299553994264			HEXB	Acute lymphocytic leukaemia	Inverse variance weighted	31.9069056606705	25	0.160723479784007
NSFL1C	Acute Lymphoblastic Leukemia	MR Egger	56.7723588209962	62	0.663850646333418			PNLIPRP2	Acute lymphocytic leukaemia	MR Egger	9.84339446755508	11	0.544526639967123
NSFL1C	Acute Lymphoblastic Leukemia	Inverse variance weighted	56.7852792132328	63	0.69603963291047			PNLIPRP2	Acute lymphocytic leukaemia	Inverse variance weighted	11.4497970400578	12	0.490814091678294
NSUN5P2	Acute Lymphoblastic Leukemia	MR Egger	29.0095363450545	29	0.464569636377875			LRP11	Acute lymphocytic leukaemia	MR Egger	20.2312058965555	15	0.163241623930756
NSUN5P2	Acute Lymphoblastic Leukemia	Inverse variance weighted	29.0145658535884	30	0.516831586186698			LRP11	Acute lymphocytic leukaemia	Inverse variance weighted	20.2386582953815	16	0.209663423503212
NSUN7	Acute Lymphoblastic Leukemia	MR Egger	55.6168036167325	38	0.0323934111574735			PLTP	Acute lymphocytic leukaemia	MR Egger	15.8411179718302	16	0.464103653386717
NSUN7	Acute Lymphoblastic Leukemia	Inverse variance weighted	55.707486761073	39	0.0403108822902623			PLTP	Acute lymphocytic leukaemia	Inverse variance weighted	17.1453106206519	17	0.44456404062775
NT5DC2	Acute Lymphoblastic Leukemia	MR Egger	46.0269187941102	43	0.348046959901021			REG3G	Acute lymphocytic leukaemia	MR Egger	25.9241242664469	24	0.357026174802245
NT5DC2	Acute Lymphoblastic Leukemia	Inverse variance weighted	47.4599436019801	44	0.333497932704809			REG3G	Acute lymphocytic leukaemia	Inverse variance weighted	27.1445942381522	25	0.348699764519413
NTPCR	Acute Lymphoblastic Leukemia	MR Egger	50.9176607759546	76	0.988053536847547			VNN2	Acute lymphocytic leukaemia	MR Egger	13.9929334702526	17	0.667602090234143
NTPCR	Acute Lymphoblastic Leukemia	Inverse variance weighted	50.9637748527236	77	0.990372897968022			VNN2	Acute lymphocytic leukaemia	Inverse variance weighted	15.5332772058494	18	0.62508398350176
NUCB1	Acute Lymphoblastic Leukemia	MR Egger	21.9856863166463	25	0.636570452266429			CAMP	Acute lymphocytic leukaemia	MR Egger	24.4171614868999	31	0.793159127660729
NUCB1	Acute Lymphoblastic Leukemia	Inverse variance weighted	22.7902864541906	26	0.644782513199345			CAMP	Acute lymphocytic leukaemia	Inverse variance weighted	26.6869584018962	32	0.732454568854631
NUDT6	Acute Lymphoblastic Leukemia	MR Egger	4.85526037140615	8	0.772928201448303			A2ML1	Acute lymphocytic leukaemia	MR Egger	1.25923370355039	2	0.532795901707912
NUDT6	Acute Lymphoblastic Leukemia	Inverse variance weighted	10.733977032866	9	0.294385120229739			A2ML1	Acute lymphocytic leukaemia	Inverse variance weighted	2.10428306146095	3	0.551046756942352
NUFIP2	Acute Lymphoblastic Leukemia	MR Egger	18.0951319462045	18	0.449402282930756			AGRN	Acute lymphocytic leukaemia	MR Egger	10.1690650203059	15	0.808972594367785
NUFIP2	Acute Lymphoblastic Leukemia	Inverse variance weighted	19.0823285660648	19	0.451566150902089			AGRN	Acute lymphocytic leukaemia	Inverse variance weighted	12.196463920114	16	0.730348410287617
NUP85	Acute Lymphoblastic Leukemia	MR Egger	54.0219899491459	46	0.194682392292565			AOC1	Acute lymphocytic leukaemia	MR Egger	6.79119102686183	10	0.744999790313281
NUP85	Acute Lymphoblastic Leukemia	Inverse variance weighted	54.217546200854	47	0.218459241681622			AOC1	Acute lymphocytic leukaemia	Inverse variance weighted	6.80393866419374	11	0.814731384441264
NUP88	Acute Lymphoblastic Leukemia	MR Egger	38.6193029472229	35	0.309367190502249			CES1	Acute lymphocytic leukaemia	MR Egger	7.13889597529328	6	0.308193076159496
NUP88	Acute Lymphoblastic Leukemia	Inverse variance weighted	39.0307115949498	36	0.335144809159774			CES1	Acute lymphocytic leukaemia	Inverse variance weighted	7.92385650183039	7	0.33935607160626
NUPL2	Acute Lymphoblastic Leukemia	MR Egger	35.6663010191542	38	0.577857607338636			CD248	Acute lymphocytic leukaemia	MR Egger	19.931679582675	17	0.277738652217908
NUPL2	Acute Lymphoblastic Leukemia	Inverse variance weighted	38.5819832043734	39	0.488774428553515			CD248	Acute lymphocytic leukaemia	Inverse variance weighted	21.6445775028156	18	0.248147661273801
OAS1	Acute Lymphoblastic Leukemia	MR Egger	78.2731999212707	65	0.124916864605911			FGFBP1	Acute lymphocytic leukaemia	MR Egger	3.21660028910366	6	0.781211296075401
OAS1	Acute Lymphoblastic Leukemia	Inverse variance weighted	78.2736625719081	66	0.143290422384487			FGFBP1	Acute lymphocytic leukaemia	Inverse variance weighted	3.37534	7	0.848248025919978
OASL	Acute Lymphoblastic Leukemia	MR Egger	65.8516456648813	41	0.00820615772283833			FOLR3	Acute lymphocytic leukaemia	MR Egger	13.4718713206507	19	0.813563035476964
OASL	Acute Lymphoblastic Leukemia	Inverse variance weighted	67.2098794820025	42	0.00803859080510674			FOLR3	Acute lymphocytic leukaemia	Inverse variance weighted	14.3147554543613	20	0.814185234956119
OBSCN	Acute Lymphoblastic Leukemia	MR Egger	12.5584271427928	11	0.323162613008386			HS3ST1	Acute lymphocytic leukaemia	MR Egger	0.599570138413988	1	0.438742084761774
OBSCN	Acute Lymphoblastic Leukemia	Inverse variance weighted	13.0551422480566	12	0.365045483707451			HS3ST1	Acute lymphocytic leukaemia	Inverse variance weighted	3.31612811516972	2	0.190507434756291
OCEL1	Acute Lymphoblastic Leukemia	MR Egger	40.7825363100554	35	0.231131198401549			ATRN	Acute lymphocytic leukaemia	MR Egger	5.39611543408385	8	0.71452033992931
OCEL1	Acute Lymphoblastic Leukemia	Inverse variance weighted	40.8859814511813	36	0.264518898524024			ATRN	Acute lymphocytic leukaemia	Inverse variance weighted	10.387974778603	9	0.319998722766494
ODC1	Acute Lymphoblastic Leukemia	MR Egger	0.0812739150226736	2	0.960177651964149			LEFTY2	Acute lymphocytic leukaemia	MR Egger	9.67720053364928	9	0.377243993156675
ODC1	Acute Lymphoblastic Leukemia	Inverse variance weighted	0.229292512345043	3	0.972727444335284			LEFTY2	Acute lymphocytic leukaemia	Inverse variance weighted	9.82410437881694	10	0.456058522744176
ODF3B	Acute Lymphoblastic Leukemia	MR Egger	13.2660338444007	22	0.925475148618993			LEFTY2	Acute lymphocytic leukaemia	MR Egger	18.2567150160026	17	0.372821358207865
ODF3B	Acute Lymphoblastic Leukemia	Inverse variance weighted	13.8482236083891	23	0.931135211737624			LEFTY2	Acute lymphocytic leukaemia	Inverse variance weighted	19.2216252731115	18	0.378296895907183
OPRL1	Acute Lymphoblastic Leukemia	MR Egger	26.7280213784746	33	0.771455385400607			BIRC7	Acute lymphocytic leukaemia	MR Egger	5.47234155944444	2	0.0648180749748305
OPRL1	Acute Lymphoblastic Leukemia	Inverse variance weighted	27.1235733681351	34	0.792589789778687			BIRC7	Acute lymphocytic leukaemia	Inverse variance weighted	5.56609307671307	3	0.134738529622254
OR13A1	Acute Lymphoblastic Leukemia	MR Egger	10.9486071494846	14	0.690068532863136			LRP12	Acute lymphocytic leukaemia	MR Egger	0.136959269354221	1	0.711322820177838
OR13A1	Acute Lymphoblastic Leukemia	Inverse variance weighted	11.3558707038667	15	0.726983578717067			LRP12	Acute lymphocytic leukaemia	Inverse variance weighted	0.567118447540233	2	0.753098519485716
OR2A9P	Acute Lymphoblastic Leukemia	MR Egger	21.1979717185043	20	0.385563559598353			NAGLU	Acute lymphocytic leukaemia	MR Egger	29.4210149809193	30	0.495569749416727
OR2A9P	Acute Lymphoblastic Leukemia	Inverse variance weighted	21.2306773407559	21	0.444936109040271			NAGLU	Acute lymphocytic leukaemia	Inverse variance weighted	31.5391273226024	31	0.43929797996075
OR7D2	Acute Lymphoblastic Leukemia	MR Egger	32.017953027038	39	0.778344163144782			NPTXR	Acute lymphocytic leukaemia	MR Egger	4.36616775825309	9	0.885703615012927
OR7D2	Acute Lymphoblastic Leukemia	Inverse variance weighted	35.1066010768241	40	0.689961392773487			NPTXR	Acute lymphocytic leukaemia	Inverse variance weighted	4.69530554148039	10	0.910580918485181
OR7E14P	Acute Lymphoblastic Leukemia	MR Egger	30.8046119331041	29	0.374692941234655			PRSS8	Acute lymphocytic leukaemia	MR Egger	4.16660907556269	3	0.244026284674595
OR7E14P	Acute Lymphoblastic Leukemia	Inverse variance weighted	30.8327446110159	30	0.423662735916229			PRSS8	Acute lymphocytic leukaemia	Inverse variance weighted	4.17264131122187	4	0.383145295348073
ORC5	Acute Lymphoblastic Leukemia	MR Egger	0.0148273512608549	1	0.903083065142722			BCHE	Acute lymphocytic leukaemia	MR Egger	26.2659157677289	17	0.0697501763561364
ORC5	Acute Lymphoblastic Leukemia	Inverse variance weighted	0.0352667056230175	2	0.982521204963562			BCHE	Acute lymphocytic leukaemia	Inverse variance weighted	30.9499349284389	18	0.0291732867722321
OSBPL3	Acute Lymphoblastic Leukemia	MR Egger	21.9801203172822	32	0.907925444610809			SAA1	Acute lymphocytic leukaemia	MR Egger	14.9915372092198	12	0.241899584543266
OSBPL3	Acute Lymphoblastic Leukemia	Inverse variance weighted	21.9892525210623	33	0.927835915439315			SAA1	Acute lymphocytic leukaemia	Inverse variance weighted	15.8805700402546	13	0.255639221957195
OSBPL8	Acute Lymphoblastic Leukemia	MR Egger	18.4557590516604	21	0.6200082579046			SAA4	Acute lymphocytic leukaemia	MR Egger	6.25416012209879	7	0.510405736021328
OSBPL8	Acute Lymphoblastic Leukemia	Inverse variance weighted	19.2559272720026	22	0.629476048506345			SAA4	Acute lymphocytic leukaemia	Inverse variance weighted	6.46169554536093	8	0.595659449921261
OSGIN1	Acute Lymphoblastic Leukemia	MR Egger	28.2809154742874	26	0.344775270464393			CLSTN1	Acute lymphocytic leukaemia	MR Egger	1.84084641277691	5	0.870699431224152
OSGIN1	Acute Lymphoblastic Leukemia	Inverse variance weighted	29.0892813098685	27	0.356583150513202			CLSTN1	Acute lymphocytic leukaemia	Inverse variance weighted	6.14546585454036	6	0.40709390829035
OTOF	Acute Lymphoblastic Leukemia	MR Egger	17.5163306657615	15	0.288945870484909			GLIPR2	Acute lymphocytic leukaemia	MR Egger	1.65550307414475	4	0.798783771363243
OTOF	Acute Lymphoblastic Leukemia	Inverse variance weighted	19.4745706631994	16	0.244822873690361			GLIPR2	Acute lymphocytic leukaemia	Inverse variance weighted	2.00128197230143	5	0.848967622236453
P2RX4	Acute Lymphoblastic Leukemia	MR Egger	64.2170671894567	53	0.139035602916924			ALAD	Acute lymphocytic leukaemia	MR Egger	7.39078931814594	3	0.0604319481667396
P2RX4	Acute Lymphoblastic Leukemia	Inverse variance weighted	64.2225927672924	54	0.160863431042122			ALAD	Acute lymphocytic leukaemia	Inverse variance weighted	9.1039850742085	4	0.0585522560250966
P2RX7	Acute Lymphoblastic Leukemia	MR Egger	15.7636811376334	20	0.731172599372015			ADH1C	Acute lymphocytic leukaemia	MR Egger	0.163224526803293	2	0.921629238812585
P2RX7	Acute Lymphoblastic Leukemia	Inverse variance weighted	16.0570589863073	21	0.766436638407461			ADH1C	Acute lymphocytic leukaemia	Inverse variance weighted	1.47982446744864	3	0.686934599721737
PADI4	Acute Lymphoblastic Leukemia	MR Egger	21.0295563722466	28	0.82411459843378			GSS	Acute lymphocytic leukaemia	MR Egger	1.86238135354867	3	0.601455032798035
PADI4	Acute Lymphoblastic Leukemia	Inverse variance weighted	21.3970607008781	29	0.844278160394549			GSS	Acute lymphocytic leukaemia	Inverse variance weighted	1.8641813341749	4	0.7607214624757
PAICS	Acute Lymphoblastic Leukemia	MR Egger	0.10262681707893	1	0.748699836266318			EPHB4	Acute lymphocytic leukaemia	MR Egger	7.81173859631329	10	0.647220082426013
PAICS	Acute Lymphoblastic Leukemia	Inverse variance weighted	0.156773198507085	2	0.924606905099899			EPHB4	Acute lymphocytic leukaemia	Inverse variance weighted	14.980684471523	11	0.183382912824976
PALD1	Acute Lymphoblastic Leukemia	MR Egger	3.06704876483313	3	0.38140265881136			MSR1	Acute lymphocytic leukaemia	MR Egger	11.7454790070937	15	0.698183207650506
PALD1	Acute Lymphoblastic Leukemia	Inverse variance weighted	5.61320288190675	4	0.229956605375298			MSR1	Acute lymphocytic leukaemia	Inverse variance weighted	12.1034011200157	16	0.736831646238463
PAM16	Acute Lymphoblastic Leukemia	MR Egger	10.0805480986304	12	0.608894253857115			PRSS27	Acute lymphocytic leukaemia	MR Egger	14.3527924932354	16	0.572449522250076
PAM16	Acute Lymphoblastic Leukemia	Inverse variance weighted	11.2476976526918	13	0.590075745769387			PRSS27	Acute lymphocytic leukaemia	Inverse variance weighted	14.3671672301321	17	0.640962594128535
PAN3-AS1	Acute Lymphoblastic Leukemia	MR Egger	4.14017949883802	3	0.246719711613096			SLITRK1	Acute lymphocytic leukaemia	MR Egger	0.524664045448313	2	0.769255570971619
PAN3-AS1	Acute Lymphoblastic Leukemia	Inverse variance weighted	4.47259960554932	4	0.345808833214746			SLITRK1	Acute lymphocytic leukaemia	Inverse variance weighted	1.2728976823318	3	0.735578627872213
PAN3	Acute Lymphoblastic Leukemia	MR Egger	1.25401645105773	4	0.869127589040145			VIM	Acute lymphocytic leukaemia	MR Egger	2.18172582531308	4	0.702376246385849
PAN3	Acute Lymphoblastic Leukemia	Inverse variance weighted	1.82706860602871	5	0.872518347906216			VIM	Acute lymphocytic leukaemia	Inverse variance weighted	2.31479484308768	5	0.804091481685222
PAPD4	Acute Lymphoblastic Leukemia	MR Egger	1.06043640148189	3	0.786632437290129			KLK14	Acute lymphocytic leukaemia	MR Egger	6.85551097074575	11	0.810660864292706
PAPD4	Acute Lymphoblastic Leukemia	Inverse variance weighted	2.20208582762384	4	0.6986474224894			KLK14	Acute lymphocytic leukaemia	Inverse variance weighted	7.28283227689584	12	0.838370821326745
PARD6A	Acute Lymphoblastic Leukemia	MR Egger	0.0229222563113679	1	0.879659417575714			PPP3R1	Acute lymphocytic leukaemia	MR Egger	1.53428815619003	4	0.820550887859453
PARD6A	Acute Lymphoblastic Leukemia	Inverse variance weighted	0.0500060347620665	2	0.975306969151142			PPP3R1	Acute lymphocytic leukaemia	Inverse variance weighted	4.26164705102006	5	0.512392496246461
PARP16	Acute Lymphoblastic Leukemia	MR Egger	21.4499117716491	24	0.612062923326507			PHGDH	Acute lymphocytic leukaemia	MR Egger	10.300935814286	11	0.503538220070568
PARP16	Acute Lymphoblastic Leukemia	Inverse variance weighted	24.7824303735776	25	0.474618594186828			PHGDH	Acute lymphocytic leukaemia	Inverse variance weighted	11.420625800382	12	0.493255776031352
PASK	Acute Lymphoblastic Leukemia	MR Egger	29.1510153285408	29	0.457221748428407			ACHE	Acute lymphocytic leukaemia	MR Egger	0.339062911641818	1	0.560370627104275
PASK	Acute Lymphoblastic Leukemia	Inverse variance weighted	30.3418462666812	30	0.448249654591009			ACHE	Acute lymphocytic leukaemia	Inverse variance weighted	1.20744143465707	2	0.546773457224564
PBX4	Acute Lymphoblastic Leukemia	MR Egger	0.0098379753244417	1	0.920990139238436			AMY2B	Acute lymphocytic leukaemia	MR Egger	13.4518264635229	19	0.814658987368086
PBX4	Acute Lymphoblastic Leukemia	Inverse variance weighted	0.125606611712326	2	0.939128176536191			AMY2B	Acute lymphocytic leukaemia	Inverse variance weighted	14.7239897708647	20	0.791977095158021
PCCA	Acute Lymphoblastic Leukemia	MR Egger	11.3877643779025	21	0.954693302594695			ENPEP	Acute lymphocytic leukaemia	MR Egger	4.81367086878419	6	0.567923890100737
PCCA	Acute Lymphoblastic Leukemia	Inverse variance weighted	15.1269656837159	22	0.856731826563721			ENPEP	Acute lymphocytic leukaemia	Inverse variance weighted	5.30253362714414	7	0.623096170695191
PCED1B	Acute Lymphoblastic Leukemia	MR Egger	68.1414798635545	43	0.00863555637584193			ANTXR2	Acute lymphocytic leukaemia	MR Egger	12.4125804524278	11	0.333442914265814
PCED1B	Acute Lymphoblastic Leukemia	Inverse variance weighted	68.8148371933987	44	0.00977901831362126			ANTXR2	Acute lymphocytic leukaemia	Inverse variance weighted	12.492316441617	12	0.406993661153506
[truncated: 23,395 more rows]
