# Supplementary material for: Study on the Gene Regulatory Effects in Leukemia Based on Multi-omics Mendelian Randomization, Network Pharmacology, and Functional Validation
Source: Research Square preprint supplement (doi:10.21203/rs.3.rs-7510513/v1), 2025-09-25
Supplement: Supplementary file 8 [file d1ef79bd6734ed56272994a7.xlsx]

## Sheet: Supplementary Table 3
Supplementary Table 3.1 SNP information included in MR studies
Exposure-eQTL	Outcome	SNP	Chr	Pos	EA	OA	Eaf.exposure	Beta.exposure	Se.exposure	Pval.exposure	Eaf.outcome	Beta.outcome	Pval.outcome
A2MP1.csv	Acute Lymphoblastic Leukemia	rs10842914	12	9275778	T	C	0.312452815944436	0.270120830654265	0.0215925651407497	6.599e-36	0.358924	0.0327181	0.748335
A2MP1.csv	Acute Lymphoblastic Leukemia	rs11046949	12	8883322	G	A	0.234685399199335	-0.132935	0.0236480056791378	1.892e-08	0.2197	0.0524203	0.653686
A2MP1.csv	Acute Lymphoblastic Leukemia	rs111791571	12	9906324	G	A	0.0532657470500249	0.260208003576685	0.0445576909443277	5.2264e-09	0.0519789	0.0535959	0.806934
A2MP1.csv	Acute Lymphoblastic Leukemia	rs117049967	12	9479055	A	G	0.0261919377941477	0.507281644699893	0.0686629188819564	1.4905e-13	0.03828	-0.188859	0.465004
A2MP1.csv	Acute Lymphoblastic Leukemia	rs117902159	12	9110790	A	G	0.0204948619323727	-0.683539	0.0826628506826225	1.3486e-16	0.00658562	-0.303932	0.617749
A2MP1.csv	Acute Lymphoblastic Leukemia	rs118021813	12	10042176	C	T	0.0527085771610099	-0.299492	0.0490809026172623	1.0462e-09	0.0242018	0.0629082	0.842715
A2MP1.csv	Acute Lymphoblastic Leukemia	rs118085779	12	9141665	C	A	0.0158898967782296	-0.797006	0.0935189291857413	1.5628e-17	0.0117609	1.10492	0.016836
A2MP1.csv	Acute Lymphoblastic Leukemia	rs12371578	12	9082757	T	C	0.104892031339576	0.224664213254094	0.0326551567979323	5.9937e-12	0.129521	-0.0505866	0.730015
A2MP1.csv	Acute Lymphoblastic Leukemia	rs12423765	12	9137278	T	G	0.128292869432231	0.22197487494684	0.0299508689361974	1.2516e-13	0.15151	-0.0607035	0.65476
A2MP1.csv	Acute Lymphoblastic Leukemia	rs12828013	12	9158317	T	C	0.717343702808819	-0.879982	0.0222345734318429	1e-200	0.269282	0.139426	0.203353
A2MP1.csv	Acute Lymphoblastic Leukemia	rs147357428	12	9329327	T	C	0.0147915528854906	-0.704019	0.0946363490607519	1.0114e-13	0.00875971	0.659021	0.213104
A2MP1.csv	Acute Lymphoblastic Leukemia	rs148068398	12	9109812	G	A	0.0147440434064638	-0.553431	0.0966590130562823	1.0307e-08	0.0313794	-0.607632	0.02773
A2MP1.csv	Acute Lymphoblastic Leukemia	rs149835030	12	9185591	G	A	0.0182093758005294	-0.622818	0.0748498172277968	8.7224e-17	0.0106628	-0.181817	0.693831
A2MP1.csv	Acute Lymphoblastic Leukemia	rs16917857	12	9020680	A	G	0.0545616089818666	-0.307631	0.0440555403134879	2.8935e-12	0.0743326	0.23461	0.209777
A2MP1.csv	Acute Lymphoblastic Leukemia	rs1805711	12	9180496	T	C	0.080692634073621	0.314866400002771	0.0367525445889872	1.0603e-17	0.05236	-0.370347	0.0921658
A2MP1.csv	Acute Lymphoblastic Leukemia	rs2284349	12	9150834	T	C	0.22076475917258	0.398016308265374	0.0241295124744089	3.9856e-61	0.191251	-0.242706	0.0495838
A2MP1.csv	Acute Lymphoblastic Leukemia	rs2288363	12	9409078	A	T	0.302238242620971	-0.245006	0.0217887564224691	2.4621e-29	0.281497	0.0741443	0.493365
A2MP1.csv	Acute Lymphoblastic Leukemia	rs2377744	12	9323453	T	C	0.102663878886437	0.21057231174654	0.0341422475470676	6.9422e-10	0.0774108	0.0354044	0.845389
A2MP1.csv	Acute Lymphoblastic Leukemia	rs4370983	12	9478906	G	C	0.769906416052026	0.144378077372184	0.0246210909570573	4.5239e-09	0.301635	-0.108139	0.310173
A2MP1.csv	Acute Lymphoblastic Leukemia	rs61914581	12	9918800	G	A	0.143227600721587	-0.209586	0.0285637117027828	2.1746e-13	0.131426	0.225694	0.117603
A2MP1.csv	Acute Lymphoblastic Leukemia	rs61916001	12	9172176	C	T	0.0733361758207682	0.419880486428236	0.0383908280541498	7.6865e-28	0.0792396	0.149953	0.40536
A2MP1.csv	Acute Lymphoblastic Leukemia	rs61916035	12	9293798	C	A	0.0420024651559685	-0.681218	0.0546996378159652	1.3301e-35	0.029979	0.524686	0.069849
A2MP1.csv	Acute Lymphoblastic Leukemia	rs71447542	12	9084189	A	G	0.0131205235860706	-0.828705	0.106274191574313	6.2896e-15	0.00892731	-0.486344	0.362985
A2MP1.csv	Acute Lymphoblastic Leukemia	rs74891347	12	9202577	G	A	0.0332302936630603	-0.621879	0.0558254364156917	8.0299e-29	0.0299113	0.0547229	0.849565
A2MP1.csv	Acute Lymphoblastic Leukemia	rs76877631	12	10181472	G	A	0.0464596620269075	-0.288924	0.0492346617180469	4.4002e-09	0.0269748	-0.223249	0.459838
A2MP1.csv	Acute Lymphoblastic Leukemia	rs77758061	12	9388842	C	T	0.0956855081178593	0.279982254213009	0.0340155818506876	1.8566e-16	0.116397	-0.0665953	0.663581
A2MP1.csv	Acute Lymphoblastic Leukemia	rs919209	12	9333749	A	G	0.215603743094442	0.25079216164463	0.0243312728374401	6.5242e-25	0.182302	-0.139776	0.271867
AARS.csv	Acute Lymphoblastic Leukemia	rs11075762	16	70372339	T	C	0.10440493715321	0.184653311868108	0.0130150279374464	1.0934e-45	0.131605	-0.0836525	0.561032
AARS.csv	Acute Lymphoblastic Leukemia	rs117363962	16	69745501	T	C	0.0147155928685973	0.317394401983179	0.0570350593870831	2.6245e-08	0.0229875	-0.404662	0.213149
AARS.csv	Acute Lymphoblastic Leukemia	rs5014388	16	70057868	G	A	0.217891206828971	-0.108817	0.0102299506826808	2.0005e-26	0.173498	0.184124	0.151345
AARS.csv	Acute Lymphoblastic Leukemia	rs77790607	16	70293562	C	T	0.0321205086798547	-0.144948	0.025419205886702	1.1813e-08	0.0553719	0.134192	0.526075
AARS.csv	Acute Lymphoblastic Leukemia	rs8053436	16	70591857	G	A	0.633047694215808	-0.0682573	0.00824243785160257	1.2194e-16	0.273735	-0.0255672	0.815205
AARS.csv	Acute Lymphoblastic Leukemia	rs8063629	16	71285020	G	A	0.266711961650247	-0.0509489	0.00899917963692543	1.4997e-08	0.250423	0.116128	0.299084
AARS.csv	Acute Lymphoblastic Leukemia	rs9788803	16	69691995	T	A	0.731705931368836	0.0516976524136947	0.00899527638044521	9.0841e-09	0.258589	-0.0704852	0.525075
ABCA2.csv	Acute Lymphoblastic Leukemia	rs112887513	9	139905141	A	G	0.051356680123932	0.155976648270599	0.0261771667820087	2.5472e-09	0.0360907	0.148193	0.57421
ABCA2.csv	Acute Lymphoblastic Leukemia	rs116915239	9	139831744	C	T	0.0414290240811153	-0.254166	0.0272543395222104	1.1015e-20	0.0556892	-0.0989306	0.647561
ABCA2.csv	Acute Lymphoblastic Leukemia	rs12000091	9	140064219	C	T	0.125795130511077	-0.105127	0.0183900209767158	1.0868e-08	0.172401	-0.057707	0.658309
ABCA2.csv	Acute Lymphoblastic Leukemia	rs12555386	9	139819424	C	T	0.826983887968679	0.0775834410049108	0.0140876381836343	3.65e-08	0.256427	-0.0880574	0.434145
ABCA2.csv	Acute Lymphoblastic Leukemia	rs191928486	9	139901534	A	G	0.017873417721519	-0.350116	0.0447855593616929	5.3755e-15	0.023517	0.155658	0.628081
ABCA2.csv	Acute Lymphoblastic Leukemia	rs2105078	9	139622402	C	G	0.242679772374547	0.0701844476842053	0.010724024032669	5.9735e-11	0.241831	0.0975783	0.38909
ABCA2.csv	Acute Lymphoblastic Leukemia	rs34125425	9	139904722	T	C	0.0226797385620915	-0.257871	0.043400190446616	2.8191e-09	0.0083504	-0.452468	0.416912
ABCA2.csv	Acute Lymphoblastic Leukemia	rs35374928	9	140238534	A	G	0.0440003889537145	-0.161611	0.0285234976163385	1.4617e-08	0.0649842	0.204154	0.322861
ABCA2.csv	Acute Lymphoblastic Leukemia	rs41307438	9	140070397	T	C	0.151109912131956	0.0968555444202865	0.0150103128072849	1.1009e-10	0.128558	0.11832	0.425825
ABCA2.csv	Acute Lymphoblastic Leukemia	rs4880149	9	139769194	T	C	0.21791586998088	-0.131946	0.00981148746539019	3.1546e-41	0.237877	0.118266	0.301854
ABCA2.csv	Acute Lymphoblastic Leukemia	rs4880192	9	139927062	A	G	0.254427702881311	-0.320671	0.0106495318560853	3.4364e-199	0.295936	0.181261	0.0871907
ABCA2.csv	Acute Lymphoblastic Leukemia	rs4880211	9	140023766	T	C	0.110754528597918	-0.206017	0.0166340904574585	3.143e-35	0.126079	0.0707971	0.627837
ABCA2.csv	Acute Lymphoblastic Leukemia	rs4880219	9	140070638	C	T	0.547078306127277	-0.0724965	0.0122128168873005	2.917e-09	0.511775	-0.185657	0.0567074
ABCA2.csv	Acute Lymphoblastic Leukemia	rs6560663	9	140029261	G	A	0.460831761135264	-0.112036	0.0110378900954634	3.3069e-24	0.671192	0.00579503	0.955578
ABCA2.csv	Acute Lymphoblastic Leukemia	rs77740311	9	139883221	T	C	0.0494767518876672	0.168955858231423	0.0299216976997525	1.6365e-08	0.0214876	-0.0619604	0.850591
ABCA2.csv	Acute Lymphoblastic Leukemia	rs77892574	9	139942576	G	A	0.0596627203815689	0.204048154303957	0.023551808017724	4.571e-18	0.102335	-0.0527187	0.744026
ABCA2.csv	Acute Lymphoblastic Leukemia	rs78469234	9	140150288	T	C	0.0974032745854625	-0.212004	0.0202166755465225	9.9336e-26	0.133573	0.0206152	0.886209
ABCA2.csv	Acute Lymphoblastic Leukemia	rs7873815	9	139943429	A	G	0.67818541634952	0.121697412743844	0.0114534429521565	2.2752e-26	0.309058	-0.257942	0.0125052
ABCA2.csv	Acute Lymphoblastic Leukemia	rs868102	9	139850119	A	G	0.555312	0.194101204452413	0.00960968410785022	1.0112e-90	0.395875	-0.148075	0.137947
ABCA2.csv	Acute Lymphoblastic Leukemia	rs9411294	9	139931607	T	C	0.0268493958149131	-0.23399	0.0299798658520822	5.9502e-15	0.031033	0.346938	0.211969
ABCA2.csv	Acute Lymphoblastic Leukemia	rs9411295	9	139932100	A	G	0.0160043401600434	-0.564052	0.0520948933831016	2.5474e-27	0.00759771	0.76802	0.161263
ABCB9.csv	Acute Lymphoblastic Leukemia	rs11057405	12	122781897	A	G	0.0839308553932018	-0.0852434	0.0145633004778755	4.8162e-09	0.0934782	0.131152	0.432575
ABCB9.csv	Acute Lymphoblastic Leukemia	rs111835289	12	123438917	G	A	0.0510601008805677	0.12036890010903	0.0191107247930507	3.0073e-10	0.057966	0.148198	0.489468
ABCB9.csv	Acute Lymphoblastic Leukemia	rs11608811	12	123529056	A	G	0.698760724499523	0.295793420786985	0.00874143113197801	1e-200	0.266099	0.15759	0.155166
ABCB9.csv	Acute Lymphoblastic Leukemia	rs117913606	12	123461117	A	G	0.0652162901428427	-0.149491	0.0182581746081457	2.6649e-16	0.0753561	-0.0619781	0.738084
ABCB9.csv	Acute Lymphoblastic Leukemia	rs12810157	12	123565652	A	G	0.0269848607419392	0.283723940160218	0.0293097188240138	3.66e-22	0.0186325	0.0604135	0.870176
ABCB9.csv	Acute Lymphoblastic Leukemia	rs12816396	12	123009498	T	A	0.165373145740939	0.0887235710753205	0.0108070319709762	2.2156e-16	0.195786	-0.0187171	0.878632
ABCB9.csv	Acute Lymphoblastic Leukemia	rs1662	12	123900136	A	G	0.369818482468338	-0.0988441	0.00825675681903681	5.0175e-33	0.433085	-0.103244	0.296426
ABCB9.csv	Acute Lymphoblastic Leukemia	rs190515020	12	123552818	C	T	0.0128257328990228	0.69300899550294	0.126803958776063	4.6239e-08	0.000974303	-0.79293	0.659625
ABCB9.csv	Acute Lymphoblastic Leukemia	rs2154	12	123254538	G	A	0.0748915871639202	0.192630533213492	0.0160770619539374	4.4368e-33	0.156964	0.169617	0.204331
ABCB9.csv	Acute Lymphoblastic Leukemia	rs28498002	12	122599796	T	C	0.45496034118538	0.0616889406822706	0.00900331893550171	7.3029e-12	0.407708	0.0885546	0.37142
ABCB9.csv	Acute Lymphoblastic Leukemia	rs28873419	12	123898367	G	T	0.025918437580659	0.181076434712507	0.0265445694137017	9.0032e-12	0.0263519	0.202989	0.49968
ABCB9.csv	Acute Lymphoblastic Leukemia	rs34484751	12	123652527	C	A	0.0295835287096637	0.326868286001621	0.0247990080952924	1.1348e-39	0.0180692	-0.214752	0.559786
ABCB9.csv	Acute Lymphoblastic Leukemia	rs496911	12	123216469	A	G	0.379712435432889	-0.0669229	0.00830165243400787	7.5302e-16	0.373702	-0.166087	0.100733
ABCB9.csv	Acute Lymphoblastic Leukemia	rs580063	12	123206340	C	T	0.20391209123178	0.0661208688272339	0.00991317373721648	2.5615e-11	0.188494	-0.00145258	0.990693
ABCB9.csv	Acute Lymphoblastic Leukemia	rs61953572	12	124416054	C	T	0.111797087044612	0.111388881088478	0.0187931502907792	3.0852e-09	0.0709999	0.259466	0.179165
ABCB9.csv	Acute Lymphoblastic Leukemia	rs61955270	12	123684003	A	G	0.0532863411446177	-0.146384	0.0194191520712956	4.765e-14	0.0541619	-0.175995	0.410385
ABCB9.csv	Acute Lymphoblastic Leukemia	rs7297888	12	123851244	T	C	0.0438570141183539	0.189435284354937	0.0205758072224507	3.3662e-20	0.02829	-0.360171	0.217751
ABCB9.csv	Acute Lymphoblastic Leukemia	rs73230058	12	123593899	T	C	0.111007547512958	-0.129505	0.0137355841189425	4.156e-21	0.144177	-0.247901	0.071753
ABCB9.csv	Acute Lymphoblastic Leukemia	rs76573394	12	123516411	T	C	0.0340160759248499	0.303276897996885	0.0244217725451056	2.0819e-35	0.0248808	0.136321	0.662284
ABCB9.csv	Acute Lymphoblastic Leukemia	rs77064381	12	123554082	C	T	0.0607947262406153	-0.13732	0.0181082089085073	3.3662e-14	0.0527326	-0.165961	0.452953
ABCB9.csv	Acute Lymphoblastic Leukemia	rs77983490	12	123651738	A	G	0.0189008269111774	0.328339501476236	0.0345119196825912	1.8418e-21	0.0122777	0.411969	0.361461
ABCB9.csv	Acute Lymphoblastic Leukemia	rs7953894	12	123404966	A	C	0.498091523006585	-0.107005	0.00834760866998937	1.2868e-37	0.485589	0.0194546	0.841761
ABCB9.csv	Acute Lymphoblastic Leukemia	rs79739600	12	123949627	G	A	0.10127958003527	-0.0859263	0.0137054520295589	3.6198e-10	0.0860381	-0.0209579	0.905433
ABT1.csv	Acute Lymphoblastic Leukemia	rs112252880	6	26260695	A	G	0.0141411403270986	-0.372464	0.0569272833786469	6.0378e-11	0.0101243	-0.463677	0.344998
ABT1.csv	Acute Lymphoblastic Leukemia	rs115941737	6	25898698	G	T	0.0235990695707338	-0.175856	0.0304318291857433	7.5235e-09	0.020895	-0.0608797	0.860766
ABT1.csv	Acute Lymphoblastic Leukemia	rs12193475	6	26883334	A	G	0.407027317597615	-0.0987319	0.0101147252387274	1.6486e-22	0.293658	0.141746	0.182026
ABT1.csv	Acute Lymphoblastic Leukemia	rs13210340	6	26326314	A	G	0.557754807258283	0.0652414059788884	0.00961199351438503	1.1417e-11	0.502083	0.0650782	0.504384
ABT1.csv	Acute Lymphoblastic Leukemia	rs138643110	6	26375821	C	T	0.0196083578328433	-0.230728	0.0371615061127365	5.3323e-10	0.00216322	-1.01435	0.357994
ABT1.csv	Acute Lymphoblastic Leukemia	rs150269116	6	27249415	T	G	0.0357403355215171	-0.201328	0.0267002797838472	4.6853e-14	0.026937	-0.3068	0.312088
ABT1.csv	Acute Lymphoblastic Leukemia	rs2295603	6	27220890	G	A	0.458585441016198	-0.0932563	0.00873472170481065	1.3098e-26	0.440599	0.0341501	0.726613
ABT1.csv	Acute Lymphoblastic Leukemia	rs4712955	6	25684279	A	G	0.463489796685332	0.0546896920176872	0.00872800702484635	3.7044e-10	0.484655	0.0935739	0.345447
ABT1.csv	Acute Lymphoblastic Leukemia	rs57838818	6	26597992	A	G	0.0871697545943102	-0.279883	0.0154293008273005	1.5459e-73	0.0480898	-0.234991	0.300775
ABT1.csv	Acute Lymphoblastic Leukemia	rs6456739	6	26604140	T	C	0.506689465970161	-0.127448	0.00870548630390443	1.5607e-48	0.546847	-0.201266	0.0403376
ABT1.csv	Acute Lymphoblastic Leukemia	rs6926142	6	27395764	T	C	0.457382840392348	0.0499037607682694	0.0087364998456381	1.1166e-08	0.541704	-0.0342189	0.724995
ABT1.csv	Acute Lymphoblastic Leukemia	rs73736567	6	26240597	A	G	0.0238892657283364	-0.1684	0.0302877866426468	2.6947e-08	0.00140217	-0.495376	0.714835
ABT1.csv	Acute Lymphoblastic Leukemia	rs75523987	6	26644646	A	G	0.0254448147974273	-0.613459	0.0309225099404781	1.3771e-87	0.0203906	-0.577722	0.0835892
ABT1.csv	Acute Lymphoblastic Leukemia	rs9358942	6	26457124	G	A	0.207405450290632	-0.0741741	0.0107581277855215	5.3941e-12	0.193648	-0.165777	0.179234
AC002511.1.csv	Acute Lymphoblastic Leukemia	rs11084813	19	35923858	C	T	0.286853120243531	0.135063076716825	0.0121990567503184	1.723e-28	0.314792	0.134102	0.20097
AC002511.1.csv	Acute Lymphoblastic Leukemia	rs117215242	19	35940721	C	G	0.0757080158993044	0.157499454263607	0.0218846507147076	6.1733e-13	0.0797718	0.324732	0.0675274
AC002511.1.csv	Acute Lymphoblastic Leukemia	rs3815025	19	35942900	A	T	0.422872551352209	0.062772143314775	0.0112854883525898	2.6639e-08	0.396094	0.114061	0.247553
AC004696.2.csv	Acute Lymphoblastic Leukemia	rs10404345	19	56994925	A	G	0.336894156726559	0.212436620557923	0.0164540520457848	3.9122e-38	0.259398	0.17904	0.109007
AC004696.2.csv	Acute Lymphoblastic Leukemia	rs17273491	19	57072433	T	G	0.0479583733857149	0.222961542340344	0.039256557211836	1.3517e-08	0.0346294	0.492786	0.0661912
AC004696.2.csv	Acute Lymphoblastic Leukemia	rs1990575	19	57062047	T	C	0.0910948021487478	-0.154408	0.0270241731092282	1.1048e-08	0.100304	-0.110242	0.494941
AC004696.2.csv	Acute Lymphoblastic Leukemia	rs1990576	19	57116983	A	G	0.293129482823707	-0.128313	0.017086924020952	5.9399e-14	0.312754	-0.0484833	0.643016
AC004696.2.csv	Acute Lymphoblastic Leukemia	rs2058131	19	57041758	G	A	0.189202901274005	0.214672635195066	0.0198535656994549	3.0004e-27	0.154366	0.289035	0.0314811
AC004696.2.csv	Acute Lymphoblastic Leukemia	rs4801161	19	56926292	T	C	0.199164934964981	-0.179527	0.0200977842928311	4.1536e-19	0.188239	-0.33522	0.00819219
AC004696.2.csv	Acute Lymphoblastic Leukemia	rs4801177	19	57089050	C	T	0.274547187797903	-0.29954	0.0174239020956547	3.08e-66	0.329107	-0.216711	0.0354658
AC004696.2.csv	Acute Lymphoblastic Leukemia	rs8107758	19	56953863	T	C	0.0363280894789488	0.46127013353055	0.0509493713514718	1.3858e-19	0.019529	0.353377	0.328878
AC005154.6.csv	Acute Lymphoblastic Leukemia	rs10229836	7	30652090	T	C	0.0604448509941746	-0.321493	0.0450452895580807	9.5251e-13	0.054235	0.253432	0.233395
AC005154.6.csv	Acute Lymphoblastic Leukemia	rs10271509	7	30731969	T	C	0.712628347090799	0.292024321872736	0.0210654722292725	1.0674e-43	0.280777	-0.0719249	0.506357
AC005154.6.csv	Acute Lymphoblastic Leukemia	rs117264024	7	30541040	T	C	0.0160026322086624	0.969481188322124	0.0940732405994919	6.6614e-25	0.00321683	-0.36835	0.651721
AC005154.6.csv	Acute Lymphoblastic Leukemia	rs117305230	7	30804641	A	G	0.029036301179092	0.577631671918051	0.0639319622270978	1.64e-19	0.0524428	-0.348711	0.115175
AC005154.6.csv	Acute Lymphoblastic Leukemia	rs11763119	7	30452918	T	C	0.0283987036729267	-0.39438	0.0573893635338415	6.3219e-12	0.0139594	0.534472	0.205264
AC005154.6.csv	Acute Lymphoblastic Leukemia	rs11771217	7	30782763	T	C	0.330508474576271	0.200571316759355	0.0202656653726198	4.2895e-23	0.301537	-0.047743	0.65402
AC005154.6.csv	Acute Lymphoblastic Leukemia	rs118095447	7	30665579	G	A	0.0390511431214484	0.999533205274601	0.0492283887546592	1.1853e-91	0.0689611	-0.00916068	0.962404
AC005154.6.csv	Acute Lymphoblastic Leukemia	rs13221972	7	30414662	T	C	0.135731445189025	0.190152315116283	0.0278330062085632	8.3856e-12	0.14619	-0.0444084	0.75247
AC005154.6.csv	Acute Lymphoblastic Leukemia	rs138116210	7	30315243	T	C	0.0215168695975462	0.414255231465886	0.0727107983546392	1.2179e-08	0.0172438	-0.476752	0.233486
AC005154.6.csv	Acute Lymphoblastic Leukemia	rs146685777	7	30661237	A	G	0.0133081642284096	1.18061114913419	0.199262628758998	3.1268e-09	0.0154677	0.365114	0.368203
AC005154.6.csv	Acute Lymphoblastic Leukemia	rs2302340	7	30795331	G	A	0.58228741464159	-0.136887	0.0193504624250879	1.5031e-12	0.450001	0.123087	0.207053
AC005154.6.csv	Acute Lymphoblastic Leukemia	rs255104	7	30732025	T	C	0.120592734225621	0.289335071258549	0.0293131119252873	5.5941e-23	0.144962	-0.269209	0.0558303
AC005154.6.csv	Acute Lymphoblastic Leukemia	rs35676837	7	30453875	G	A	0.0460985540967259	0.803887127693311	0.0454599866368069	5.6297e-70	0.0715725	-0.397568	0.0389422
AC005154.6.csv	Acute Lymphoblastic Leukemia	rs38407	7	30538054	T	C	0.724021257072947	0.97197777079982	0.0220129582921861	1e-200	0.30239	-0.122692	0.247373
AC005154.6.csv	Acute Lymphoblastic Leukemia	rs38491	7	30621012	T	C	0.0899819112496632	-0.689658	0.0349774865261875	1.5349e-86	0.0615162	-0.181476	0.36797
AC005154.6.csv	Acute Lymphoblastic Leukemia	rs42573	7	30339020	G	A	0.70414423011383	-0.128562	0.0235190265783788	4.5927e-08	0.336527	0.0582575	0.577507
AC005154.6.csv	Acute Lymphoblastic Leukemia	rs4270	7	30536611	C	T	0.777720700152207	-0.237539	0.0229278520080545	3.7539e-25	0.21607	0.120403	0.313278
AC005154.6.csv	Acute Lymphoblastic Leukemia	rs55947863	7	30566421	G	A	0.0342283552932375	0.720178521012265	0.0524746996941385	7.2727e-43	0.0315825	-0.25243	0.366898
AC005154.6.csv	Acute Lymphoblastic Leukemia	rs57323039	7	30446534	T	C	0.103780675711226	0.18407756655641	0.0312578649272219	3.8901e-09	0.186999	0.0402836	0.748514
AC005154.6.csv	Acute Lymphoblastic Leukemia	rs57379358	7	30537214	T	C	0.175934076682316	-0.271548	0.0250362193721156	2.0744e-27	0.179543	-0.0522767	0.687165
AC005154.6.csv	Acute Lymphoblastic Leukemia	rs57778402	7	30861637	T	A	0.938077982863398	0.378899644838104	0.0395568919088493	9.856e-22	0.0669331	-0.167627	0.391043
AC005154.6.csv	Acute Lymphoblastic Leukemia	rs6973967	7	30177035	C	T	0.461812606191206	-0.117208	0.019121636445672	8.799e-10	0.562081	0.055601	0.582637
AC005154.6.csv	Acute Lymphoblastic Leukemia	rs73083617	7	30537882	C	T	0.0164320951828207	0.959753964669004	0.0838227711111988	2.3623e-30	0.0317052	-0.271287	0.331277
AC005154.6.csv	Acute Lymphoblastic Leukemia	rs74939745	7	30549955	T	C	0.0278133284578115	0.618275079175242	0.0628916343710829	8.3122e-23	0.0465695	0.257863	0.26706
AC005154.6.csv	Acute Lymphoblastic Leukemia	rs78284531	7	30656650	A	G	0.144481190574618	-0.304373	0.0271146668087401	3.06e-29	0.214673	0.0448518	0.705276
AC005154.6.csv	Acute Lymphoblastic Leukemia	rs78315636	7	30746011	T	G	0.972426943182792	-0.335834	0.0582175278454887	7.9838e-09	0.0509292	-0.0210937	0.924392
AC005154.6.csv	Acute Lymphoblastic Leukemia	rs79259887	7	30650369	A	G	0.968800600292248	0.440200881281582	0.0562075770626533	4.817e-15	0.0124526	0.384827	0.391598
AC005488.1.csv	Acute Lymphoblastic Leukemia	rs10232729	7	73124968	C	T	0.617582963755926	-0.137875	0.0213236844419562	1.0063e-10	0.411963	0.199008	0.0451211
AC005488.1.csv	Acute Lymphoblastic Leukemia	rs10261934	7	72799013	A	C	0.0979238423268274	-0.448951	0.0384382052112654	1.613e-31	0.107192	-0.0215403	0.891688
AC005488.1.csv	Acute Lymphoblastic Leukemia	rs112174498	7	72409197	A	G	0.0342431761786601	0.73333828368037	0.0689525813491143	2.0439e-26	0.0560403	-0.0704002	0.742178
AC005488.1.csv	Acute Lymphoblastic Leukemia	rs11769503	7	73143086	G	A	0.622433874800358	0.152651300804731	0.0213764407170787	9.2654e-13	0.398535	-0.16014	0.109201
AC005488.1.csv	Acute Lymphoblastic Leukemia	rs117944170	7	72144202	T	C	0.0432562478519173	0.628162756495006	0.0509396875071975	6.1371e-35	0.0409712	-0.52155	0.031861
AC005488.1.csv	Acute Lymphoblastic Leukemia	rs118063154	7	72977956	A	T	0.0496202320340539	0.689520746507763	0.0477200104162668	2.5361e-47	0.0271444	-0.23615	0.424418
AC005488.1.csv	Acute Lymphoblastic Leukemia	rs13243883	7	72389657	A	G	0.110373019928462	-0.360989	0.0364580545744224	4.0967e-23	0.148572	-0.22791	0.0959467
AC005488.1.csv	Acute Lymphoblastic Leukemia	rs13308366	7	71847855	T	C	0.0982886126921439	0.272517177607869	0.0348091274135408	4.9255e-15	0.0771965	0.107265	0.558506
AC005488.1.csv	Acute Lymphoblastic Leukemia	rs140022260	7	72350970	A	G	0.0339714714714715	0.867704520425387	0.0572039951231746	5.7081e-52	0.0262172	-0.0180444	0.952878
AC005488.1.csv	Acute Lymphoblastic Leukemia	rs140671732	7	72419438	T	C	0.0128485511208311	0.642297913682359	0.116411040087423	3.4405e-08	0.00107994	-1.11168	0.47874
AC005488.1.csv	Acute Lymphoblastic Leukemia	rs142132949	7	72067153	T	C	0.0139200188746019	0.652282229265695	0.114161091633389	1.1061e-08	0.0139614	0.810007	0.0473827
AC005488.1.csv	Acute Lymphoblastic Leukemia	rs143176215	7	73070663	A	G	0.100949001838157	-0.206124	0.0343981699627699	2.0677e-09	0.111501	-0.174674	0.261945
AC005488.1.csv	Acute Lymphoblastic Leukemia	rs144893323	7	73345804	T	C	0.0163250883392226	0.566657140761291	0.0947254543991726	2.2041e-09	0.0191955	-0.413354	0.250405
AC005488.1.csv	Acute Lymphoblastic Leukemia	rs145236068	7	73032615	T	C	0.0650991477151056	-0.290873	0.0420056865311244	4.3659e-12	0.0736265	0.060472	0.745995
AC005488.1.csv	Acute Lymphoblastic Leukemia	rs17674025	7	71809414	T	C	0.420995017363732	-0.147911	0.0209915994621542	1.8387e-12	0.481634	-0.0127053	0.896101
AC005488.1.csv	Acute Lymphoblastic Leukemia	rs186943016	7	73224611	T	C	0.0488286898679264	0.31680519501611	0.0536085682645374	3.4294e-09	0.0564197	-0.296476	0.158996
AC005488.1.csv	Acute Lymphoblastic Leukemia	rs2968506	7	71894780	A	G	0.208762496213269	0.235878875048212	0.025733550986037	4.8999e-20	0.194706	0.0122843	0.920587
AC005488.1.csv	Acute Lymphoblastic Leukemia	rs548613	7	71676810	G	A	0.618137884165219	-0.184153	0.0213295920116408	5.9347e-18	0.467446	-0.0424272	0.664926
AC005488.1.csv	Acute Lymphoblastic Leukemia	rs55704260	7	72756785	A	G	0.0215994020926756	0.723958108402065	0.0712851876171316	3.1288e-24	0.0189240000000001	-0.298831	0.393443
AC005488.1.csv	Acute Lymphoblastic Leukemia	rs62463250	7	71868228	C	A	0.194099198513184	-0.172938	0.026201481699708	4.1005e-11	0.151004	-0.135105	0.319772
AC005488.1.csv	Acute Lymphoblastic Leukemia	rs62465902	7	71988282	G	A	0.0628374254729825	-0.379376	0.0427033411910353	6.4498e-19	0.0776597	0.0253397	0.888651
AC005488.1.csv	Acute Lymphoblastic Leukemia	rs6460040	7	72392946	T	C	0.694592836902495	0.882774366853832	0.0248041395808302	1e-200	0.2904	-0.166934	0.11923
AC005488.1.csv	Acute Lymphoblastic Leukemia	rs6460057	7	73203405	A	T	0.507763203181766	-0.167857	0.0207281654199435	5.5778e-16	0.49755	0.0757847	0.434641
AC005488.1.csv	Acute Lymphoblastic Leukemia	rs6957305	7	72004534	T	C	0.604168352893565	0.444134828087345	0.0211906497489072	1.5532e-97	0.396698	-0.0348871	0.72567
AC005488.1.csv	Acute Lymphoblastic Leukemia	rs6959160	7	73071620	T	C	0.154854027435807	0.271185198205991	0.030885641516348	1.6318e-18	0.126139	-0.342002	0.0194818
AC005488.1.csv	Acute Lymphoblastic Leukemia	rs6975732	7	73056993	T	A	0.258371532903426	-0.150887	0.0238926248875678	2.6946e-10	0.266948	-0.0168898	0.878715
AC005488.1.csv	Acute Lymphoblastic Leukemia	rs72608539	7	72028200	A	G	0.867399010556659	0.519145449549858	0.0305559417039351	9.7722e-65	0.109568	-0.216514	0.162653
AC005488.1.csv	Acute Lymphoblastic Leukemia	rs73362331	7	72887577	G	A	0.0627736531505806	0.457627077609146	0.0516964232178606	8.5965e-19	0.018683	-0.526786	0.146317
AC005488.1.csv	Acute Lymphoblastic Leukemia	rs73362402	7	73123529	T	C	0.071718596401248	0.4019471961573	0.040167004382706	1.4228e-23	0.0657131	0.142141	0.466218
AC005488.1.csv	Acute Lymphoblastic Leukemia	rs77354187	7	73213987	G	A	0.0615957007027697	-0.27292	0.0431030817294132	2.42e-10	0.0459184	0.234468	0.31282
AC005488.1.csv	Acute Lymphoblastic Leukemia	rs77509567	7	72949969	G	A	0.0436188202526609	-0.333961	0.0547055355222383	1.0293e-09	0.0288076	-0.171746	0.556237
AC005488.1.csv	Acute Lymphoblastic Leukemia	rs77788393	7	72399120	T	C	0.0389303567760049	-0.487547	0.0752980256903087	9.4812e-11	0.12123	0.28814	0.054684
AC005488.1.csv	Acute Lymphoblastic Leukemia	rs79434099	7	72765917	T	C	0.0927872682143379	-0.34274	0.0385110162685965	5.5947e-19	0.106464	-0.04595	0.770442
AC005488.1.csv	Acute Lymphoblastic Leukemia	rs79771773	7	72750190	T	G	0.028442613826116	0.781379312801439	0.0754314508245587	3.8172e-25	0.0299584	-0.428836	0.135808
AC005488.1.csv	Acute Lymphoblastic Leukemia	rs956422	7	71851586	G	T	0.940592175369158	0.458165273978379	0.0438385327979925	1.4499e-25	0.0308957	-0.0784305	0.783552
AC005488.1.csv	Acute Lymphoblastic Leukemia	rs9647948	7	71503303	T	C	0.258333646510579	0.137083380620817	0.0236746594512921	7.0303e-09	0.226251	0.0968314	0.406621
AC005682.6.csv	Acute Lymphoblastic Leukemia	rs11767035	7	22927553	A	G	0.26267411573742	-0.386199	0.0227432663563783	1.1392e-64	0.227513	-0.111316	0.337122
AC005682.6.csv	Acute Lymphoblastic Leukemia	rs11768107	7	22959129	G	C	0.149290351804318	0.319268293087782	0.0280828489451641	5.9941e-30	0.221735	0.141083	0.2267
AC005682.6.csv	Acute Lymphoblastic Leukemia	rs117914483	7	22730934	C	T	0.0405072547434861	0.291326261686853	0.0507899826856907	9.7053e-09	0.0648924	0.0553511	0.777395
AC005682.6.csv	Acute Lymphoblastic Leukemia	rs118184215	7	22887578	A	C	0.0539193932303223	-0.524167	0.0505815761319221	3.6532e-25	0.0340802	0.0145604	0.957524
AC005682.6.csv	Acute Lymphoblastic Leukemia	rs12666499	7	22543081	T	C	0.740239726027397	-0.126771	0.0228185567414014	2.7634e-08	0.323008	0.0271699	0.793577
AC005682.6.csv	Acute Lymphoblastic Leukemia	rs148756785	7	23121797	A	C	0.0321588029443707	0.326116613841086	0.0567277716812353	8.9985e-09	0.0371358	-0.185371	0.470253
AC005682.6.csv	Acute Lymphoblastic Leukemia	rs1595126	7	22885966	A	G	0.0955724153549994	0.357555086772998	0.0340369814822604	8.2097e-26	0.140161	0.248715	0.0741225
AC005682.6.csv	Acute Lymphoblastic Leukemia	rs28431944	7	22893172	T	A	0.122555312240429	0.437180393993026	0.0305374606385093	1.7335e-46	0.115646	-0.0266938	0.859893
AC005682.6.csv	Acute Lymphoblastic Leukemia	rs439593	7	23419579	G	A	0.905963836722024	0.220443498273361	0.0355038650786538	5.3323e-10	0.0723187	0.0700801	0.709761
AC005682.6.csv	Acute Lymphoblastic Leukemia	rs4722172	7	22786532	G	A	0.206990261946101	-0.146857	0.0246971315982754	2.741e-09	0.192123	-0.186259	0.134954
AC005682.6.csv	Acute Lymphoblastic Leukemia	rs56053938	7	22777188	G	A	0.0994418388309624	0.290544108233001	0.033443156213152	3.7018e-18	0.223972	0.0297047	0.800337
AC005682.6.csv	Acute Lymphoblastic Leukemia	rs6950451	7	22919808	G	A	0.21139464960296	-0.203735	0.0253805869386091	9.956e-16	0.127773	-0.181231	0.214398
AC005682.6.csv	Acute Lymphoblastic Leukemia	rs717624	7	22894487	T	C	0.607768340348767	-0.445004	0.020495752108806	1.5803e-104	0.36664	-0.100874	0.317179
AC005682.6.csv	Acute Lymphoblastic Leukemia	rs73084119	7	23031124	G	C	0.142395749722891	0.183165561871184	0.028638860776957	1.5992e-10	0.123591	-0.00133061	0.992793
AC005682.6.csv	Acute Lymphoblastic Leukemia	rs77086708	7	22949337	A	C	0.0167280540208717	0.45341860799628	0.0795387517096937	1.1953e-08	0.0117743	-0.223229	0.618351
AC006129.4.csv	Acute Lymphoblastic Leukemia	rs10415806	19	41949474	G	T	0.940507835746876	-0.423896	0.0403007952305916	7.107e-26	0.0752389999999999	0.0202282	0.913444
AC006129.4.csv	Acute Lymphoblastic Leukemia	rs117568232	19	42198477	C	A	0.0250712250712251	-0.659361	0.0620615516103432	2.2948e-26	0.0143924	-0.680724	0.0956709
AC006129.4.csv	Acute Lymphoblastic Leukemia	rs139053033	19	42246580	T	C	0.0316343574429316	-0.602906	0.0663014967438312	9.5813e-20	0.038194	-0.442417	0.0869821
AC006129.4.csv	Acute Lymphoblastic Leukemia	rs143714364	19	41727468	T	G	0.0160367142783479	-0.673385	0.0854560932031757	3.2738e-15	0.0148094	-0.209059	0.608353
AC006129.4.csv	Acute Lymphoblastic Leukemia	rs34652740	19	42143020	T	A	0.281208712392888	-0.180564	0.021209349767118	1.6891e-17	0.262939	-0.0371733	0.736748
AC006129.4.csv	Acute Lymphoblastic Leukemia	rs4803488	19	42127907	G	A	0.294257560312606	0.146378654165947	0.0209321684778988	2.6907e-12	0.276576	0.0391327	0.718542
AC006129.4.csv	Acute Lymphoblastic Leukemia	rs7255742	19	42049821	A	G	0.2007967229133	0.486715065272662	0.0237967567238381	5.6492e-93	0.264309	0.087748	0.424933
AC006129.4.csv	Acute Lymphoblastic Leukemia	rs7258162	19	42360735	G	C	0.339464688058426	-0.151519	0.0209532103817578	4.7804e-13	0.287228	-0.176226	0.103091
AC006129.4.csv	Acute Lymphoblastic Leukemia	rs73033671	19	42068752	C	T	0.0795175720055868	0.317146174838098	0.0352455129734945	2.2987e-19	0.0878984	0.153299	0.370551
AC006129.4.csv	Acute Lymphoblastic Leukemia	rs74328649	19	42124108	T	C	0.0299189694577187	0.338061387223314	0.0559713550262942	1.5431e-09	0.0330838	-0.34492	0.196175
AC006129.4.csv	Acute Lymphoblastic Leukemia	rs8110782	19	42073623	G	A	0.0167013603136951	0.644184550041579	0.113056485730107	1.2136e-08	0.0111755	-0.137352	0.771783
AC009299.3.csv	Acute Lymphoblastic Leukemia	rs10208511	2	161863052	G	A	0.168514412416851	0.225144095571821	0.0254670605583129	9.5377e-19	0.142229	0.096059	0.488516
AC009299.3.csv	Acute Lymphoblastic Leukemia	rs114692895	2	161945115	C	T	0.0308889362609252	0.629702453927439	0.0551181182647479	3.1583e-30	0.02967	0.238447	0.399737
AC009299.3.csv	Acute Lymphoblastic Leukemia	rs116387811	2	162149908	T	C	0.0220294834848149	-0.479028	0.0682045286437371	2.1653e-12	0.0061625	-0.171934	0.79038
AC009299.3.csv	Acute Lymphoblastic Leukemia	rs11685006	2	162199996	T	C	0.0265502415673064	-0.476482	0.0644111844124616	1.3867e-13	0.0244642	0.120574	0.694832
AC009299.3.csv	Acute Lymphoblastic Leukemia	rs1267044	2	162127611	T	C	0.868352812958022	0.583163912077321	0.0281949162888572	4.9075e-95	0.157664	0.0461569	0.729587
AC009299.3.csv	Acute Lymphoblastic Leukemia	rs13008413	2	162080194	T	C	0.0360844128708734	-0.368385	0.055475438698173	3.1241e-11	0.0577665	-0.114754	0.58336
AC009299.3.csv	Acute Lymphoblastic Leukemia	rs13021256	2	162796517	A	T	0.647877239831263	-0.259614	0.0215213357954365	1.6524e-33	0.305464	0.0852214	0.420799
AC009299.3.csv	Acute Lymphoblastic Leukemia	rs13398392	2	162187250	T	C	0.32071855387275	-0.169781	0.0204238583813259	9.3313e-17	0.283558	-0.029755	0.782251
AC009299.3.csv	Acute Lymphoblastic Leukemia	rs13423348	2	161780199	C	G	0.209103948063713	0.189805165838894	0.0234414185301833	5.6424e-16	0.256917	0.174468	0.117201
AC009299.3.csv	Acute Lymphoblastic Leukemia	rs141688623	2	162021221	A	C	0.0219504330200848	-0.579617	0.0706876383220009	2.4079e-16	0.0167071	-0.463963	0.233544
AC009299.3.csv	Acute Lymphoblastic Leukemia	rs149873976	2	162042353	T	C	0.0304138795986622	-0.445013	0.0603137518106663	1.602e-13	0.0426762	-0.256961	0.284087
AC009299.3.csv	Acute Lymphoblastic Leukemia	rs1667597	2	162685991	G	A	0.171145101281521	0.341427950355965	0.0253106453431162	1.8056e-41	0.183541	0.160755	0.205173
AC009299.3.csv	Acute Lymphoblastic Leukemia	rs16845639	2	161965564	G	A	0.178511030102597	-0.230673	0.0248938066928703	1.9253e-20	0.243328	-0.219889	0.052723
AC009299.3.csv	Acute Lymphoblastic Leukemia	rs17758740	2	162211269	A	G	0.0396136618141097	-0.441444	0.0488874810686075	1.7167e-19	0.0474067	-0.119165	0.603422
AC009299.3.csv	Acute Lymphoblastic Leukemia	rs192436622	2	162198507	A	G	0.0182418667819001	-0.510903	0.0870066910202304	4.3057e-09	0.042264	-0.0714932	0.766961
AC009299.3.csv	Acute Lymphoblastic Leukemia	rs2048827	2	161842590	C	A	0.228315845097003	-0.196178	0.0227110331612144	5.7106e-18	0.217146	-0.0810372	0.492843
AC009299.3.csv	Acute Lymphoblastic Leukemia	rs3769983	2	161994383	A	G	0.534676079734219	-0.757776	0.0191222315808136	1e-200	0.425922	-0.230482	0.0188447
AC009299.3.csv	Acute Lymphoblastic Leukemia	rs3788979	2	162900889	T	C	0.149667405764967	0.163788967225543	0.0267218597620556	8.8322e-10	0.194109	-0.0960165	0.439381
AC009299.3.csv	Acute Lymphoblastic Leukemia	rs41265135	2	162728938	C	A	0.0247657610998635	0.548763113653909	0.0613568185395367	3.7669e-19	0.0732083	-0.0642779	0.733566
AC009299.3.csv	Acute Lymphoblastic Leukemia	rs62194170	2	161866504	A	G	0.777151051625239	0.267665962422071	0.0229382091372072	1.8357e-31	0.208821	0.295033	0.0134394
AC009299.3.csv	Acute Lymphoblastic Leukemia	rs6432673	2	161998425	T	C	0.0557362450149069	0.280273533061771	0.0428920073857999	6.395e-11	0.0476507	0.0855177	0.710052
AC009299.3.csv	Acute Lymphoblastic Leukemia	rs6729406	2	162278427	T	C	0.17369489232157	0.453981262254038	0.025167490589744	9.7321e-73	0.241984	-0.0178278	0.875779
AC009299.3.csv	Acute Lymphoblastic Leukemia	rs71424730	2	163041404	G	A	0.063199054287533	-0.263016	0.0391783154885588	1.9014e-11	0.0691546	-0.143498	0.451731
AC009299.3.csv	Acute Lymphoblastic Leukemia	rs72871796	2	162462235	G	A	0.0183807439824945	0.590530314509129	0.0721461069380259	2.723e-16	0.00786699	0.273076	0.631101
AC009299.3.csv	Acute Lymphoblastic Leukemia	rs72874209	2	161886032	T	C	0.0215118953045951	-0.358277	0.0657123602952244	4.975e-08	0.0161327	0.133049	0.728071
AC009299.3.csv	Acute Lymphoblastic Leukemia	rs73013282	2	161920544	A	C	0.0562234388759141	0.54480994064183	0.0414064829939982	1.543e-39	0.0599608	0.155384	0.452189
AC009299.3.csv	Acute Lymphoblastic Leukemia	rs73971292	2	161821810	C	T	0.0397949600876506	0.318552858525711	0.0487672966619787	6.4897e-11	0.0216424	0.748362	0.0209662
AC009299.3.csv	Acute Lymphoblastic Leukemia	rs75573615	2	162062870	T	C	0.0293807748419517	-0.537081	0.0568917793878731	3.7136e-21	0.0183578	-0.0577943	0.872395
AC009299.3.csv	Acute Lymphoblastic Leukemia	rs75613846	2	162043971	C	T	0.0231786542923434	-0.524188	0.0687441002240022	2.4328e-14	0.0112412	-0.372999	0.428146
AC009299.3.csv	Acute Lymphoblastic Leukemia	rs76086380	2	162759768	A	G	0.034086602236119	-0.305366	0.0525559248569177	6.2324e-09	0.0089358	-1.07418	0.0463415
AC009299.3.csv	Acute Lymphoblastic Leukemia	rs76959957	2	161751658	C	T	0.0364894134288114	-0.330209	0.055207864499465	2.215e-09	0.0436817	0.276793	0.245863
AC009299.3.csv	Acute Lymphoblastic Leukemia	rs77512782	2	162613603	A	G	0.176849808340109	-0.433088	0.0257899230785536	2.7461e-63	0.16384	-0.238725	0.0684384
AC009299.3.csv	Acute Lymphoblastic Leukemia	rs77914022	2	162096806	A	G	0.0203995747319926	-0.488918	0.0731497273148785	2.3251e-11	0.030933	0.154375	0.583891
AC009299.3.csv	Acute Lymphoblastic Leukemia	rs78599284	2	161334789	A	G	0.0976131820201123	-0.246106	0.0321198939534961	1.8277e-14	0.0940997	-0.0918418	0.581752
AC009299.3.csv	Acute Lymphoblastic Leukemia	rs79745765	2	162046450	A	G	0.0180314591414809	-0.445642	0.0716408097145286	4.9526e-10	0.0159634	-0.578606	0.136146
AC009299.3.csv	Acute Lymphoblastic Leukemia	rs79978648	2	161178007	C	T	0.115142539800074	0.20106100539167	0.0336306774929615	2.2534e-09	0.123566	0.0391412	0.79069
AC009404.2.csv	Acute Lymphoblastic Leukemia	rs1052637	2	118575215	G	C	0.628609023990236	0.154647498046371	0.0112666742954205	7.0943e-43	0.384633	0.200583	0.0425138
AC009404.2.csv	Acute Lymphoblastic Leukemia	rs114020708	2	118627454	T	C	0.0912866203563878	-0.132152	0.0186900513549535	1.5404e-12	0.0857949	-0.203286	0.242072
AC009404.2.csv	Acute Lymphoblastic Leukemia	rs114067756	2	118431726	A	G	0.0273427415885036	0.206285608671499	0.0364069834050756	1.4617e-08	0.0229854	-0.272149	0.410428
AC009404.2.csv	Acute Lymphoblastic Leukemia	rs116027436	2	118476505	G	C	0.0137362637362637	-0.700391	0.0891184907795046	3.8659e-15	0.00491436	-0.534176	0.448127
AC009404.2.csv	Acute Lymphoblastic Leukemia	rs2570207	2	118606236	G	A	0.159927092337179	0.101058401774308	0.0146835990024276	5.8852e-12	0.221338	0.0239641	0.839234
AC009404.2.csv	Acute Lymphoblastic Leukemia	rs67784820	2	118606530	T	C	0.0568456426521673	-0.252627	0.0232507992542653	1.6848e-27	0.0465366	-0.254286	0.27301
AC009404.2.csv	Acute Lymphoblastic Leukemia	rs9646906	2	118828742	G	A	0.895518678545482	0.129654974686466	0.017771667126277	2.9777e-13	0.0597595	-0.107033	0.600705
AC009506.1.csv	Acute Lymphoblastic Leukemia	rs1011770	2	160238718	G	A	0.0277342525853964	0.34046869758146	0.0580529084677158	4.4967e-09	0.0482703	0.0842353	0.716409
AC009506.1.csv	Acute Lymphoblastic Leukemia	rs10202187	2	160427646	T	C	0.609651606084626	0.875784515550217	0.0195432649645461	1e-200	0.389876	-0.0464682	0.644384
AC009506.1.csv	Acute Lymphoblastic Leukemia	rs10203954	2	160351267	G	A	0.0832675611681137	-1.12491	0.0345099583719862	1e-200	0.0985479	-0.0239606	0.885474
AC009506.1.csv	Acute Lymphoblastic Leukemia	rs112123194	2	160063994	T	C	0.776261276958222	-0.143646	0.0236111612216088	1.1722e-09	0.151132	0.126783	0.356494
AC009506.1.csv	Acute Lymphoblastic Leukemia	rs112267135	2	160104086	A	G	0.0242406846884459	-0.496253	0.0792825799607386	3.8646e-10	0.0425915	-0.142692	0.565146
AC009506.1.csv	Acute Lymphoblastic Leukemia	rs114480399	2	160639289	G	A	0.037751167038766	0.498103537761279	0.0543188154592453	4.739e-20	0.0323928	0.100256	0.71816
AC009506.1.csv	Acute Lymphoblastic Leukemia	rs115972585	2	160290996	C	T	0.0303140822105895	0.428016811877094	0.0626112566927187	8.1435e-12	0.026987	-0.0514713	0.864684
AC009506.1.csv	Acute Lymphoblastic Leukemia	rs12472767	2	160782335	C	T	0.229705351773903	0.205140051172141	0.0226626510646539	1.4063e-19	0.165848	-0.060698	0.639694
AC009506.1.csv	Acute Lymphoblastic Leukemia	rs12692550	2	160249771	T	C	0.168721109399076	-0.411079	0.0254546202226923	1.143e-58	0.153078	0.150668	0.261022
AC009506.1.csv	Acute Lymphoblastic Leukemia	rs13395793	2	160262498	G	A	0.643660589589703	0.182195977408722	0.0199069071946945	5.5786e-20	0.377039	-0.135416	0.179983
AC009506.1.csv	Acute Lymphoblastic Leukemia	rs138937208	2	159684153	T	C	0.0247123264404908	-0.400658	0.061427020523212	6.9099e-11	0.0248494	0.390519	0.208999
AC009506.1.csv	Acute Lymphoblastic Leukemia	rs146781089	2	160430738	C	T	0.0160919540229885	-1.07264	0.170211972922492	2.9421e-10	0.00595056	0.610898	0.344197
AC009506.1.csv	Acute Lymphoblastic Leukemia	rs148377852	2	160265314	T	C	0.0357948247525131	-0.756932	0.0513226187294565	3.1411e-49	0.0647851	0.294685	0.146958
AC009506.1.csv	Acute Lymphoblastic Leukemia	rs1522696	2	159788585	T	C	0.837378274326263	0.159508345588872	0.0258329844182412	6.6331e-10	0.165394	-0.105305	0.423246
AC009506.1.csv	Acute Lymphoblastic Leukemia	rs16843639	2	159913886	A	G	0.147919876733436	-0.154585	0.0268516652138323	8.5521e-09	0.186801	-0.0243121	0.84519
AC009506.1.csv	Acute Lymphoblastic Leukemia	rs16844315	2	160621924	G	T	0.0989846757756473	-0.473058	0.0319208640099742	1.0911e-49	0.0799024	0.175208	0.334578
AC009506.1.csv	Acute Lymphoblastic Leukemia	rs174239	2	160165090	T	C	0.960818042813456	-0.436271	0.0491539582039699	6.9433e-19	0.0288089	0.110377	0.708848
AC009506.1.csv	Acute Lymphoblastic Leukemia	rs17829933	2	160861579	A	G	0.326017512871585	0.217476330100065	0.0203366745310427	1.0882e-26	0.318539	-0.0949373	0.369479
AC009506.1.csv	Acute Lymphoblastic Leukemia	rs191138971	2	159670257	C	T	0.0418706026307739	-0.26635	0.0476509647940204	2.2759e-08	0.0200232	0.0532095	0.884715
AC009506.1.csv	Acute Lymphoblastic Leukemia	rs2556092	2	160675785	G	A	0.0475138962917841	-0.516949	0.0448681645541136	1.0269e-30	0.0184137	0.316042	0.380196
AC009506.1.csv	Acute Lymphoblastic Leukemia	rs264640	2	159958682	A	G	0.0168673012318029	-0.640482	0.0777019400272675	1.6823e-16	0.00430799999999998	1.96851	0.010936
AC009506.1.csv	Acute Lymphoblastic Leukemia	rs2966383	2	161088655	A	G	0.922676538013454	-0.339767	0.0356898173395606	1.7285e-21	0.0432494	-0.20374	0.39347
AC009506.1.csv	Acute Lymphoblastic Leukemia	rs34442850	2	160709785	A	G	0.0167618962592626	0.468269313602651	0.0826148645229709	1.4447e-08	0.0307239	-0.041229	0.886676
AC009506.1.csv	Acute Lymphoblastic Leukemia	rs369552	2	159963319	T	G	0.732586920369726	-0.123728	0.0224168710055594	3.3977e-08	0.345717	0.139844	0.173547
AC009506.1.csv	Acute Lymphoblastic Leukemia	rs4665135	2	160872397	C	T	0.846048329512571	-0.280993	0.0264140454113484	1.9792e-26	0.12828	0.0884518	0.54057
AC009506.1.csv	Acute Lymphoblastic Leukemia	rs60591811	2	160361225	T	C	0.105785408381768	-0.246208	0.0310316327677835	2.1186e-15	0.12908	0.0920074	0.52773
AC009506.1.csv	Acute Lymphoblastic Leukemia	rs62171541	2	160255276	C	T	0.109323503902862	-0.224511	0.031533713537927	1.0808e-12	0.138184	0.131113	0.357964
AC009506.1.csv	Acute Lymphoblastic Leukemia	rs62175468	2	160855617	G	T	0.134569234461243	-0.220439	0.0314558279812055	2.4175e-12	0.156068	0.117907	0.380453
AC009506.1.csv	Acute Lymphoblastic Leukemia	rs62175970	2	161356295	C	T	0.0384756545143137	-0.291205	0.0495668167763848	4.2233e-09	0.0161445	0.0333713	0.931765
AC009506.1.csv	Acute Lymphoblastic Leukemia	rs62177356	2	161285041	T	C	0.564505170982109	-0.13064	0.0192264563172903	1.0831e-11	0.411934	0.0633643	0.51878
AC009506.1.csv	Acute Lymphoblastic Leukemia	rs6432608	2	161034991	C	T	0.53700977616729	-0.160457	0.0191199685353804	4.7713e-17	0.448666	-0.0482523	0.621835
AC009506.1.csv	Acute Lymphoblastic Leukemia	rs6732881	2	160707466	T	C	0.0571697816868227	0.496105509687557	0.0410754774991974	1.3837e-33	0.0877296	-0.065271	0.70439
AC009506.1.csv	Acute Lymphoblastic Leukemia	rs72936445	2	159885707	A	G	0.269516798791997	0.163118600117043	0.0214923843308005	3.2139e-14	0.21745	-0.10176	0.389727
AC009506.1.csv	Acute Lymphoblastic Leukemia	rs72966306	2	160881113	T	C	0.0923684210526316	-0.289049	0.0329506240326296	1.7521e-18	0.127243	0.121648	0.405892
AC009506.1.csv	Acute Lymphoblastic Leukemia	rs74790442	2	161211509	A	G	0.0285060251371313	-0.515559	0.0622181858231753	1.1673e-16	0.0307489	0.386157	0.168769
AC009506.1.csv	Acute Lymphoblastic Leukemia	rs75564074	2	160859890	G	A	0.0309573858207529	0.361122382968461	0.0550390756216029	5.3448e-11	0.0351533	-0.127474	0.62896
AC009506.1.csv	Acute Lymphoblastic Leukemia	rs75787766	2	160554929	A	G	0.019391606838872	0.52187080620011	0.0778458518474484	2.0307e-11	0.0197975	0.441739	0.200872
AC009506.1.csv	Acute Lymphoblastic Leukemia	rs76512834	2	159843096	A	G	0.0373790242938969	0.320134991955905	0.0545662942875974	4.4429e-09	0.0346513	-0.372956	0.161032
AC009506.1.csv	Acute Lymphoblastic Leukemia	rs76655089	2	160849387	A	G	0.0288216496096436	0.524544151167217	0.0569791276428396	3.3914e-20	0.0140064	-0.16951	0.684476
AC009506.1.csv	Acute Lymphoblastic Leukemia	rs76700619	2	160315232	C	T	0.0158955962394854	0.464179428549896	0.0775778701992004	2.188e-09	0.00446553	0.0453896	0.951571
AC009506.1.csv	Acute Lymphoblastic Leukemia	rs77012951	2	160392467	C	T	0.909203652899395	0.474436124776443	0.0331787434980798	2.207e-46	0.0630844	-0.00617612	0.975792
AC009506.1.csv	Acute Lymphoblastic Leukemia	rs77015125	2	160069101	A	G	0.0161105705946317	-0.586046	0.0757174711354869	9.9417e-15	0.0107272	-0.306543	0.537152
AC009506.1.csv	Acute Lymphoblastic Leukemia	rs79408443	2	160487939	A	G	0.0403647997340868	0.557045566104593	0.0484362177716461	1.3131e-30	0.0230314	0.0630953	0.850285
AC011816.1.csv	Acute Lymphoblastic Leukemia	rs113644516	3	37252319	A	G	0.0543758967001435	-0.450703	0.0433939718244895	2.8594e-25	0.0331257	0.332028	0.233428
AC011816.1.csv	Acute Lymphoblastic Leukemia	rs114113385	3	37195393	A	G	0.035016694490818	-0.527326	0.0535296509901595	6.773e-23	0.0675411	0.390331	0.0394067
AC011816.1.csv	Acute Lymphoblastic Leukemia	rs114405779	3	37792294	T	C	0.0147545028374044	-0.499197	0.09002493056547	2.9362e-08	0.00305017	-0.196793	0.828044
AC011816.1.csv	Acute Lymphoblastic Leukemia	rs116174102	3	37333551	C	A	0.0193963500233973	0.531766473695334	0.0751400980211013	1.4752e-12	0.00617471	-0.669971	0.254101
AC011816.1.csv	Acute Lymphoblastic Leukemia	rs116581186	3	36998587	C	T	0.0248780487804878	0.565670387719414	0.0689211559816526	2.2603e-16	0.0221855	-0.201849	0.534905
AC011816.1.csv	Acute Lymphoblastic Leukemia	rs11922913	3	37272501	C	T	0.0443386486176437	-0.321953	0.0478022840119281	1.637e-11	0.0438773	0.518103	0.02666
AC011816.1.csv	Acute Lymphoblastic Leukemia	rs13062304	3	36908023	A	G	0.180307590813508	0.43866167375206	0.0269554169791601	1.5245e-59	0.145346	-0.0721709	0.599457
AC011816.1.csv	Acute Lymphoblastic Leukemia	rs145221045	3	37412268	T	C	0.0183078664402943	-0.599699	0.0772986649467837	8.6008e-15	0.00897975	0.68528	0.204371
AC011816.1.csv	Acute Lymphoblastic Leukemia	rs145250648	3	37007183	G	A	0.0182665105843332	0.451994430419848	0.0745484043508846	1.3361e-09	0.010356	-0.496392	0.296467
AC011816.1.csv	Acute Lymphoblastic Leukemia	rs169111	3	37515533	C	T	0.139088278402044	-0.174858	0.0284359216620589	7.7875e-10	0.130944	0.0852887	0.555979
AC011816.1.csv	Acute Lymphoblastic Leukemia	rs267527	3	37516083	G	A	0.471701304070052	-0.159495	0.019711450220826	5.8886e-16	0.561256	0.0285371	0.773197
AC011816.1.csv	Acute Lymphoblastic Leukemia	rs336598	3	37272575	A	C	0.803442134200643	0.249933266384855	0.0247610678223122	5.8846e-24	0.263037	-0.0793204	0.475904
AC011816.1.csv	Acute Lymphoblastic Leukemia	rs35835767	3	37160285	G	A	0.0822567082027368	0.220707270564624	0.0358134049304078	7.156e-10	0.098099	-0.224214	0.1689
AC011816.1.csv	Acute Lymphoblastic Leukemia	rs35979223	3	36886306	A	G	0.0266212970376301	0.405332512055423	0.0653878126853833	5.6895e-10	0.0866854	0.00968833	0.955919
AC011816.1.csv	Acute Lymphoblastic Leukemia	rs55644704	3	36834099	G	A	0.408950736257806	-0.14663	0.020014490909481	2.3677e-13	0.377369	-0.0862346	0.395876
AC011816.1.csv	Acute Lymphoblastic Leukemia	rs62244273	3	37197595	A	G	0.0229624703877644	0.589835278842425	0.0656941893236537	2.7473e-19	0.0271856	-0.317976	0.287036
AC011816.1.csv	Acute Lymphoblastic Leukemia	rs6781272	3	36974632	T	A	0.0963037994037153	-0.331314	0.0333548465106641	2.9852e-23	0.0845232	0.289815	0.10002
AC011816.1.csv	Acute Lymphoblastic Leukemia	rs75114948	3	36972383	T	C	0.0214056442536162	-0.399954	0.0679870786598803	4.0338e-09	0.0089805	-0.735476	0.162125
AC011816.1.csv	Acute Lymphoblastic Leukemia	rs78889204	3	36863059	A	G	0.0247022496691663	-0.581212	0.0633950021205766	4.8098e-20	0.0128888	-0.0407343	0.926112
AC011816.1.csv	Acute Lymphoblastic Leukemia	rs9834686	3	36950971	C	T	0.0229014769115723	-0.513804	0.0657795596050626	5.6736e-15	0.0202628	0.412657	0.224824
AC011816.1.csv	Acute Lymphoblastic Leukemia	rs9881419	3	36913888	A	G	0.240213657468574	-0.751142	0.0230328296794947	1e-200	0.206891	0.251055	0.0359253
AC012309.5.csv	Acute Lymphoblastic Leukemia	rs112024956	19	37942121	C	T	0.0317316409791478	0.571757059898853	0.0612415312495425	1.0004e-20	0.0596835	-0.0166226	0.935684
AC012309.5.csv	Acute Lymphoblastic Leukemia	rs11667451	19	37726241	A	G	0.12077487244898	-0.38178	0.0329421422078865	4.6639e-31	0.140504	0.0797356	0.568386
AC012309.5.csv	Acute Lymphoblastic Leukemia	rs117516089	19	36920271	T	C	0.115178772205982	0.312221476769454	0.0336260758386505	1.6171e-20	0.1362	0.126367	0.373911
AC012309.5.csv	Acute Lymphoblastic Leukemia	rs117977613	19	38210986	T	C	0.0226284837637433	-0.507779	0.0729001954928696	3.2747e-12	0.0169265	0.542584	0.150398
AC012309.5.csv	Acute Lymphoblastic Leukemia	rs139624251	19	37746010	T	C	0.0144515248065544	0.562276001826112	0.0981387233961867	1.0091e-08	0.0104266	-0.339854	0.476075
AC012309.5.csv	Acute Lymphoblastic Leukemia	rs1673086	19	37264017	C	T	0.79946019402816	-0.193416	0.026809669462296	5.4172e-13	0.214641	0.217114	0.0674652
AC012309.5.csv	Acute Lymphoblastic Leukemia	rs256744	19	37855488	A	G	0.371871006539878	0.5447266378957	0.0222110759590499	7.9954e-133	0.345391	-0.0570225	0.576508
AC012309.5.csv	Acute Lymphoblastic Leukemia	rs2945994	19	36874112	G	T	0.474562404870624	-0.197844	0.0214972516462404	3.468e-20	0.48578	0.0673405	0.489779
AC012309.5.csv	Acute Lymphoblastic Leukemia	rs34442291	19	38476233	A	G	0.0397429117682952	0.311230501108459	0.0549498580674904	1.4806e-08	0.0345086	0.276995	0.305071
AC012309.5.csv	Acute Lymphoblastic Leukemia	rs35531777	19	38476006	A	G	0.0463832785345233	-0.337874	0.051041393982074	3.5969e-11	0.0371181	0.357864	0.167067
AC012309.5.csv	Acute Lymphoblastic Leukemia	rs35540940	19	38008235	A	G	0.833075384092711	-0.369272	0.0287864316486646	1.1398e-37	0.17468	0.143577	0.262586
AC012309.5.csv	Acute Lymphoblastic Leukemia	rs515496	19	37376084	A	G	0.306035778713169	0.215457483725596	0.0232962268587242	2.2788e-20	0.320426	-0.210626	0.0423819
AC012309.5.csv	Acute Lymphoblastic Leukemia	rs55754709	19	37268712	A	G	0.0657711681458383	0.266590320942627	0.0433057701336301	7.4699e-10	0.0586142	0.099865	0.632983
AC012309.5.csv	Acute Lymphoblastic Leukemia	rs56110924	19	38590700	C	T	0.0244788451493423	0.420752564954045	0.0694666520751613	1.3886e-09	0.0160246	0.511998	0.194231
AC012309.5.csv	Acute Lymphoblastic Leukemia	rs56917663	19	37920953	C	T	0.0335180584750621	-0.338887	0.0596422306718831	1.3313e-08	0.0587773	0.00261366	0.989996
AC012309.5.csv	Acute Lymphoblastic Leukemia	rs73025467	19	37823942	C	A	0.0391686325551127	0.537747932758765	0.0553346778443076	2.527e-22	0.0401253	-0.141932	0.565649
AC012309.5.csv	Acute Lymphoblastic Leukemia	rs73027393	19	37933638	G	A	0.0272789690503856	0.47467402003981	0.06589948910729	5.8902e-13	0.0199138	-0.778618	0.0287866
AC012309.5.csv	Acute Lymphoblastic Leukemia	rs75428800	19	37876657	T	C	0.0375119434358876	-0.368425	0.0564947017364263	6.9561e-11	0.0294768	0.633411	0.00531386
AC012309.5.csv	Acute Lymphoblastic Leukemia	rs78674946	19	37829792	A	G	0.0384850767347707	0.42388782240879	0.055804084045391	3.059e-14	0.0322142	0.0457793	0.869817
AC012314.20.csv	Acute Lymphoblastic Leukemia	rs11084314	19	54681070	T	C	0.294647004180214	-0.145082	0.0253423475802112	1.0343e-08	0.308153	-0.239186	0.0247628
AC012314.20.csv	Acute Lymphoblastic Leukemia	rs67776059	19	54706042	T	C	0.354023552502453	-0.253729	0.0238893595229807	2.38e-26	0.408891	-0.0778907	0.429222
AC012314.20.csv	Acute Lymphoblastic Leukemia	rs7595	19	54697079	C	T	0.822672779886505	0.222228081637134	0.0299107745450199	1.0893e-13	0.180908	0.265699	0.0336148
AC016773.1.csv	Acute Lymphoblastic Leukemia	rs113082018	4	1713069	A	C	0.0587198918762369	-0.698543	0.0356796295439615	2.3633e-85	0.0368826	-0.4043	0.113015
AC016773.1.csv	Acute Lymphoblastic Leukemia	rs114329061	4	1786370	A	G	0.0538301696057509	-0.958352	0.0480384335415851	1.5049e-88	0.0305156	-0.261764	0.361323
AC016773.1.csv	Acute Lymphoblastic Leukemia	rs114508137	4	2434095	A	G	0.0332067473284465	0.310711682063574	0.0532040551478723	5.2201e-09	0.0472931	0.0689145	0.768909
AC016773.1.csv	Acute Lymphoblastic Leukemia	rs115344812	4	1632058	A	G	0.0167361292003126	-0.973704	0.0760100233563858	1.4339e-37	0.0111129	0.546547	0.249435
AC016773.1.csv	Acute Lymphoblastic Leukemia	rs116831094	4	1959962	C	T	0.0224481635917062	-0.398088	0.0699098805861124	1.2381e-08	0.0101696	0.5603	0.237491
AC016773.1.csv	Acute Lymphoblastic Leukemia	rs13114182	4	1596971	G	A	0.633746329585333	-0.226514	0.0225028506604481	7.7931e-24	0.26265	0.19698	0.0766602
AC016773.1.csv	Acute Lymphoblastic Leukemia	rs13135546	4	1597009	A	G	0.579556236771039	0.400218953872747	0.0223522322619112	1.078e-71	0.453797	0.171913	0.0803859
AC016773.1.csv	Acute Lymphoblastic Leukemia	rs13135667	4	1767067	C	G	0.0442256916542303	-0.340441	0.0527316385341729	1.0736e-10	0.02389	0.145884	0.645219
AC016773.1.csv	Acute Lymphoblastic Leukemia	rs13148597	4	1904354	T	C	0.151367796962763	0.379286806147918	0.0265979527452958	3.8957e-46	0.243065	0.163444	0.150583
AC016773.1.csv	Acute Lymphoblastic Leukemia	rs137897131	4	1704082	G	A	0.0418919821082849	-0.369909	0.0552970289642944	2.2378e-11	0.0863063	-0.397774	0.0243114
AC016773.1.csv	Acute Lymphoblastic Leukemia	rs142171707	4	1833793	T	C	0.0581130163020525	-0.343422	0.0458832392654738	7.1656e-14	0.0853626	0.28457	0.108862
AC016773.1.csv	Acute Lymphoblastic Leukemia	rs144351518	4	1893651	G	A	0.0233845233346629	-0.404934	0.0710336473762404	1.1939e-08	0.0204505	-0.266443	0.453859
AC016773.1.csv	Acute Lymphoblastic Leukemia	rs146157472	4	1417462	T	C	0.0163247435576683	-0.522708	0.0864522522322509	1.4812e-09	0.00418434	0.214882	0.786457
AC016773.1.csv	Acute Lymphoblastic Leukemia	rs147126736	4	2155343	T	C	0.0164026149949938	-0.537626	0.0845230188424991	2.0071e-10	0.0068735	0.0781812	0.897391
AC016773.1.csv	Acute Lymphoblastic Leukemia	rs147263416	4	1539298	T	C	0.0162729944486775	-0.580233	0.0766156230354394	3.6358e-14	0.00691181	-0.680536	0.237397
AC016773.1.csv	Acute Lymphoblastic Leukemia	rs17768776	4	2306259	T	C	0.109172677500652	-0.178837	0.0305682772659894	4.898e-09	0.0819613	-0.148272	0.407412
AC016773.1.csv	Acute Lymphoblastic Leukemia	rs192487249	4	1689817	C	T	0.018427389802115	0.794733226178547	0.0849446046001504	8.2969e-21	0.00842357	0.961117	0.00849317
AC016773.1.csv	Acute Lymphoblastic Leukemia	rs28722656	4	1625117	G	C	0.090832468879668	0.269742763928774	0.0360724763872762	7.5577e-14	0.09328	0.193724	0.250327
AC016773.1.csv	Acute Lymphoblastic Leukemia	rs3135900	4	1809025	G	A	0.0259933774834437	0.534196562546087	0.0681355784987738	4.4983e-15	0.0554011	0.207982	0.343141
AC016773.1.csv	Acute Lymphoblastic Leukemia	rs34876984	4	2338076	C	G	0.150369978858351	0.124830929095043	0.021763093689751	9.7053e-09	0.137181	0.0583895	0.683523
AC016773.1.csv	Acute Lymphoblastic Leukemia	rs553148	4	1985257	A	G	0.809780966767372	-0.11268	0.0198296795455626	1.3266e-08	0.16222	-0.0828328	0.52992
AC016773.1.csv	Acute Lymphoblastic Leukemia	rs62284900	4	1564056	T	C	0.0398573997944502	0.403835912618809	0.0487306672561944	1.1614e-16	0.0809502	0.14232	0.422752
AC016773.1.csv	Acute Lymphoblastic Leukemia	rs62285061	4	1688981	G	A	0.418379878104248	-0.717638	0.0160959243106554	1e-200	0.333693	-0.235923	0.0216202
AC016773.1.csv	Acute Lymphoblastic Leukemia	rs62285103	4	1724789	T	C	0.0951397270448426	0.410869636303267	0.0270613411339907	4.5973e-52	0.172011	0.0552307	0.67072
AC016773.1.csv	Acute Lymphoblastic Leukemia	rs62287689	4	1651569	C	T	0.259033090607429	-0.265611	0.0183245401189402	1.3068e-47	0.182595	-0.120166	0.339907
AC016773.1.csv	Acute Lymphoblastic Leukemia	rs6852987	4	1587323	C	T	0.293863007244243	0.263819261390061	0.0209403633252949	2.1547e-36	0.275672	0.0541811	0.618468
AC016773.1.csv	Acute Lymphoblastic Leukemia	rs71606368	4	1573594	A	G	0.0278082025069977	0.432364055269098	0.0667331463604103	9.2455e-11	0.0183546	0.410618	0.257079
AC016773.1.csv	Acute Lymphoblastic Leukemia	rs75369933	4	1592118	T	C	0.050444061082359	-0.535505	0.044960029418423	1.0397e-32	0.0427757	-0.0656466	0.78324
AC016773.1.csv	Acute Lymphoblastic Leukemia	rs76736092	4	1711300	A	G	0.051016542492739	0.57038994943036	0.0487871383607061	1.4137e-31	0.0564267	0.00168998	0.993614
AC016773.1.csv	Acute Lymphoblastic Leukemia	rs77914314	4	1786624	T	C	0.117967631839701	0.488168327219422	0.0305048008010637	1.2176e-57	0.115641	0.258385	0.0896892
AC016773.1.csv	Acute Lymphoblastic Leukemia	rs78931843	4	1645586	A	G	0.0191676436107855	-0.66857	0.0794053856686355	3.7713e-17	0.0172573	0.246587	0.498089
AC016773.1.csv	Acute Lymphoblastic Leukemia	rs86459	4	2051518	C	T	0.835797548641467	0.169369962905108	0.02700973781318	3.5966e-10	0.124275	0.196884	0.185494
AC018638.1.csv	Acute Lymphoblastic Leukemia	rs117256700	7	128351349	A	G	0.033152880034647	-0.370666	0.0638100949960976	6.2847e-09	0.012194	0.645951	0.162939
AC018638.1.csv	Acute Lymphoblastic Leukemia	rs11771484	7	128053345	A	G	0.121228143056762	0.213477750646039	0.0307025284615551	3.576e-12	0.147519	0.0676734	0.618088
AC018638.1.csv	Acute Lymphoblastic Leukemia	rs12113427	7	128153909	A	T	0.121777207353441	0.182962367203133	0.030605949682692	2.2617e-09	0.111353	-0.385199	0.0131141
AC018638.1.csv	Acute Lymphoblastic Leukemia	rs1565628	7	128449387	A	G	0.656830289193303	-0.117935	0.0210755866821395	2.1935e-08	0.349218	0.0403822	0.692958
AC018638.1.csv	Acute Lymphoblastic Leukemia	rs2402923	7	128281256	A	G	0.408864391422531	0.405198140657006	0.0203651950914732	4.3723e-88	0.438552	-0.16815	0.0856288
AC018638.1.csv	Acute Lymphoblastic Leukemia	rs359642	7	128000091	G	A	0.1724686902993	0.153583310314638	0.0264858175650815	6.6871e-09	0.232508	-0.016713	0.884925
AC018638.1.csv	Acute Lymphoblastic Leukemia	rs62481138	7	128126034	C	T	0.0710997132587537	0.255726305375682	0.0389351865675521	5.0996e-11	0.0682638	-0.419942	0.0313914
AC018755.15.csv	Acute Lymphoblastic Leukemia	rs35589997	19	52088048	T	C	0.74990444886103	-0.146311	0.024787585710197	3.5738e-09	0.213576	0.13267	0.264328
AC018755.15.csv	Acute Lymphoblastic Leukemia	rs6509556	19	52094516	C	T	0.176881495298641	0.271183518251841	0.0281331132189932	5.4612e-22	0.203733	-0.106959	0.375434
AC018755.15.csv	Acute Lymphoblastic Leukemia	rs7254491	19	52180491	G	C	0.879029214161697	-0.185723	0.0329191241429232	1.6809e-08	0.128225	0.239563	0.0954553
AC018755.15.csv	Acute Lymphoblastic Leukemia	rs7257832	19	52068727	G	T	0.554361306324928	-0.185587	0.0215974399976238	8.458e-18	0.436128	0.0733644	0.453097
AC018755.16.csv	Acute Lymphoblastic Leukemia	rs10408429	19	52202015	T	C	0.0776636225266362	0.143088923734132	0.0205095422956602	3.0241e-12	0.0780026	0.00231236	0.989726
AC018755.16.csv	Acute Lymphoblastic Leukemia	rs10412859	19	52058461	T	C	0.485606373783306	-0.165042	0.0108756781406628	5.1463e-52	0.458174	-0.0752883	0.440185
AC018755.16.csv	Acute Lymphoblastic Leukemia	rs10413597	19	52155141	A	G	0.704554849862828	0.126917764803341	0.0119138050129861	1.692e-26	0.286238	0.215596	0.0453033
AC018755.16.csv	Acute Lymphoblastic Leukemia	rs1106476	19	52130637	A	T	0.120239194124493	-0.0995131	0.017360061205173	9.9019e-09	0.164751	-0.212681	0.106364
AC018755.16.csv	Acute Lymphoblastic Leukemia	rs11084091	19	52081189	T	G	0.544748565236585	-0.125826	0.011337906631587	1.2857e-28	0.487853	-0.120995	0.214239
AC018755.16.csv	Acute Lymphoblastic Leukemia	rs11672546	19	52103783	G	A	0.0702172256097561	-0.248125	0.0214830964570736	7.382e-31	0.0800686	0.0177549	0.921159
AC018755.16.csv	Acute Lymphoblastic Leukemia	rs117889167	19	52130572	T	A	0.0418808777429467	0.440869683151832	0.0294519832957113	1.1707e-50	0.0265942	0.266267	0.384552
AC018755.16.csv	Acute Lymphoblastic Leukemia	rs12610545	19	51984727	G	A	0.029150796398892	0.34658944485188	0.0329789945050983	7.8355e-26	0.0323288	0.173341	0.529815
AC018755.16.csv	Acute Lymphoblastic Leukemia	rs12979133	19	52098208	T	G	0.455593607305936	-0.409334	0.0110219653235856	1e-200	0.48109	-0.114862	0.239981
AC018755.16.csv	Acute Lymphoblastic Leukemia	rs12981381	19	51829548	T	G	0.260624054022587	0.0794184545285556	0.0127024814510981	4.0523e-10	0.217084	0.133215	0.253447
AC018755.16.csv	Acute Lymphoblastic Leukemia	rs138835721	19	52581200	C	T	0.02475106685633	0.641251750867569	0.0970549485958391	3.9219e-11	0.0392264	-0.00104416	0.996656
AC018755.16.csv	Acute Lymphoblastic Leukemia	rs189979221	19	52054076	T	C	0.0151679306608884	0.575100013572718	0.0563989421960104	2.0449e-24	0.043147	-0.024217	0.918992
AC018755.16.csv	Acute Lymphoblastic Leukemia	rs2124909	19	52037704	C	A	0.63186502094893	0.235459858609059	0.011270174112427	6.3047e-97	0.369258	0.0659945	0.511338
AC018755.16.csv	Acute Lymphoblastic Leukemia	rs2864105	19	52030490	G	A	0.156618235899783	0.216431965588288	0.0151285432601451	2.0073e-46	0.160007	0.141977	0.28112
AC018755.16.csv	Acute Lymphoblastic Leukemia	rs35931837	19	52033158	T	C	0.120055197792088	-0.199411	0.0173252096079468	1.1748e-30	0.170904	-0.127256	0.325402
AC018755.16.csv	Acute Lymphoblastic Leukemia	rs58301181	19	52097261	G	C	0.894340850786844	0.148520614312501	0.0178568302589183	9.0066e-17	0.106432	0.359366	0.0225154
AC018755.16.csv	Acute Lymphoblastic Leukemia	rs61998206	19	51984738	T	C	0.033838716765546	-0.215386	0.0326287494664771	4.0784e-11	0.0270786	0.519501	0.0859666
AC018755.16.csv	Acute Lymphoblastic Leukemia	rs62114983	19	52097600	C	A	0.0173778276066741	-0.30532	0.0549028552246329	2.6793e-08	0.00918845	-0.502548	0.348302
AC018755.16.csv	Acute Lymphoblastic Leukemia	rs62116164	19	51992151	A	G	0.179494888755262	0.0944073166793729	0.0141642136289043	2.6431e-11	0.198636	0.101077	0.40469
AC018755.16.csv	Acute Lymphoblastic Leukemia	rs7246433	19	52092321	T	C	0.0356285628562856	0.414562324717347	0.0658495337564882	3.0661e-10	0.0321385	0.0542669	0.845981
AC018755.16.csv	Acute Lymphoblastic Leukemia	rs7252645	19	52097461	C	A	0.111977600721587	0.554259630347481	0.0172372819633671	1e-200	0.135975	0.218583	0.122857
AC018755.16.csv	Acute Lymphoblastic Leukemia	rs7253435	19	51930030	A	T	0.38836213488301	-0.0840594	0.0112627342675246	8.419e-14	0.361843	0.199788	0.0475105
AC018755.16.csv	Acute Lymphoblastic Leukemia	rs7254007	19	52180369	G	A	0.277518884587921	0.0819062088991353	0.0121391088137678	1.5073e-11	0.199466	-0.0498076	0.680208
AC018755.16.csv	Acute Lymphoblastic Leukemia	rs7259649	19	52095441	A	G	0.395582563982704	-0.227994	0.0112259317278184	1.0576e-91	0.402333	-0.154024	0.120058
AC018755.16.csv	Acute Lymphoblastic Leukemia	rs73050865	19	52115944	G	C	0.0302335440110991	0.248311955531783	0.0320576254914641	9.4982e-15	0.0534803	0.0915473	0.67228
AC018755.16.csv	Acute Lymphoblastic Leukemia	rs736574	19	52054826	C	T	0.342722387162238	-0.159566	0.0114525096854515	4.0035e-44	0.351529	-0.170722	0.0914892
AC018755.16.csv	Acute Lymphoblastic Leukemia	rs75310023	19	52195270	T	C	0.0579007852901743	0.203352951716471	0.0235027624696867	5.0516e-18	0.0508764	0.25635	0.238025
AC018755.16.csv	Acute Lymphoblastic Leukemia	rs77665677	19	52108383	T	C	0.0243476815688882	-0.216636	0.0378759902389563	1.0665e-08	0.0397323	-0.0820392	0.747131
AC018755.16.csv	Acute Lymphoblastic Leukemia	rs79506121	19	51950380	C	T	0.0319965696083636	0.359338660737024	0.0325998766851157	2.9734e-28	0.0358612	-0.0970355	0.711191
AC018755.16.csv	Acute Lymphoblastic Leukemia	rs8108074	19	52130925	A	G	0.838940253282573	-0.214127	0.014971509702553	2.1139e-46	0.153273	0.186255	0.168318
AC018755.16.csv	Acute Lymphoblastic Leukemia	rs9676256	19	52011164	G	A	0.0682851666729302	0.152285406864421	0.0215497200764743	1.5878e-12	0.0424187	-0.0353562	0.882429
AC018804.6.csv	Acute Lymphoblastic Leukemia	rs113502795	2	131800739	G	A	0.0181389175637812	0.670736409363144	0.082110545051617	3.1199e-16	0.019945	0.187817	0.59136
AC018804.6.csv	Acute Lymphoblastic Leukemia	rs114177402	2	131954745	C	T	0.0186913074885625	1.69137354870361	0.0947102511257229	2.4956e-71	0.0567867	0.358559	0.0987689
AC018804.6.csv	Acute Lymphoblastic Leukemia	rs12617943	2	131856499	C	T	0.350254861242213	-0.188066	0.0216948161053815	4.367e-18	0.365246	-0.090095	0.371094
AC018804.6.csv	Acute Lymphoblastic Leukemia	rs138828241	2	130597535	T	G	0.0280914939242316	0.368626924705604	0.0649665893631772	1.395e-08	0.0410445	0.0473084	0.851127
AC018804.6.csv	Acute Lymphoblastic Leukemia	rs62177466	2	131880137	A	G	0.0253272623790552	0.540023631657772	0.0754180816236205	8.0442e-13	0.0197643	0.0539089	0.876684
AC018804.6.csv	Acute Lymphoblastic Leukemia	rs6430414	2	131667339	A	G	0.222151237077477	-0.140995	0.0258236856491883	4.7613e-08	0.247724	-0.060762	0.59177
AC018804.6.csv	Acute Lymphoblastic Leukemia	rs66525751	2	131733483	A	G	0.0972009788926277	-0.195869	0.0349522286052624	2.0946e-08	0.0631078	0.36978	0.0641564
AC018804.6.csv	Acute Lymphoblastic Leukemia	rs79946675	2	131685969	C	T	0.0744036055637579	0.301251390011944	0.0487896007793253	6.6415e-10	0.157315	0.214674	0.119216
AC068831.10.csv	Acute Lymphoblastic Leukemia	rs10520699	15	91522966	A	G	0.12178321360371	0.196112117803239	0.0328243092095269	2.3066e-09	0.142548	-0.119065	0.391122
AC068831.10.csv	Acute Lymphoblastic Leukemia	rs11073966	15	91562279	G	A	0.591148455045303	-0.313495	0.0218378122222165	9.7988e-47	0.399203	0.217992	0.028086
AC068831.10.csv	Acute Lymphoblastic Leukemia	rs11073969	15	91583305	G	C	0.591873021379938	-0.123271	0.0218438056585547	1.6672e-08	0.408802	0.187987	0.0587801
AC068831.10.csv	Acute Lymphoblastic Leukemia	rs117741099	15	91558165	G	A	0.069074366354099	0.237815688637538	0.0423325302854387	1.934e-08	0.101314	-0.208549	0.20397
AC068831.10.csv	Acute Lymphoblastic Leukemia	rs3743451	15	91504181	A	G	0.923738488469442	-0.320044	0.0404448242910957	2.5086e-15	0.0768446	0.142947	0.435607
AC079325.6.csv	Acute Lymphoblastic Leukemia	rs10512597	17	72699833	T	C	0.814280266920877	0.252996011650667	0.0245136921933479	5.6867e-25	0.230941	0.05509	0.631606
AC079325.6.csv	Acute Lymphoblastic Leukemia	rs11651807	17	72558850	G	A	0.110900818230481	-0.489045	0.0303890273376444	2.8658e-58	0.0863125	-0.165783	0.338944
AC079325.6.csv	Acute Lymphoblastic Leukemia	rs117412025	17	72555806	T	C	0.0216782147951905	-0.455157	0.0778698349617	5.0596e-09	0.036089	-0.0315507	0.903271
AC079325.6.csv	Acute Lymphoblastic Leukemia	rs117693204	17	72472674	A	G	0.014264207753105	0.968648531750447	0.088993388005921	1.368e-27	0.0269371	-0.182392	0.553336
AC079325.6.csv	Acute Lymphoblastic Leukemia	rs118171890	17	72727454	T	C	0.0259839611691464	-0.400202	0.0675001335302833	3.0479e-09	0.0462324	-0.0718454	0.759817
AC079325.6.csv	Acute Lymphoblastic Leukemia	rs12451499	17	72677430	T	C	0.0251577840112202	0.560587031655621	0.0792270774136298	1.488e-12	0.0305521	0.114819	0.679629
AC079325.6.csv	Acute Lymphoblastic Leukemia	rs147016154	17	72550971	A	G	0.0741006379525122	1.38905297044712	0.0364040981339252	1e-200	0.110746	0.220306	0.156562
AC079325.6.csv	Acute Lymphoblastic Leukemia	rs148420928	17	72479652	T	C	0.0206822083171826	0.593033888889448	0.0754275325145884	3.7744e-15	0.0132676	0.180785	0.680219
AC079325.6.csv	Acute Lymphoblastic Leukemia	rs1719477	17	72569539	G	A	0.565453721878303	0.551907241155704	0.0192347748301237	4.6652e-181	0.433972	0.186135	0.0580684
AC079325.6.csv	Acute Lymphoblastic Leukemia	rs188608631	17	72664414	T	C	0.0131204898316204	-0.753374	0.134016626521815	1.892e-08	0.0153973	-0.087726	0.825876
AC079325.6.csv	Acute Lymphoblastic Leukemia	rs489540	17	72638648	C	T	0.0602800739818065	0.561907129958404	0.0400569679960652	1.0567e-44	0.0538504	0.315315	0.146833
AC079325.6.csv	Acute Lymphoblastic Leukemia	rs528258	17	72626695	G	A	0.0595159215808551	-0.234402	0.040329926692419	6.1657e-09	0.057481	-0.313049	0.139495
AC079325.6.csv	Acute Lymphoblastic Leukemia	rs550009	17	72636649	A	G	0.61761058288549	0.220933099085059	0.019616178844076	2.0029e-29	0.385894	-0.0129775	0.896951
AC079325.6.csv	Acute Lymphoblastic Leukemia	rs55888334	17	72552067	A	G	0.0557240644341517	1.27834670860864	0.041557925027751	1e-200	0.0603343	0.0542964	0.791881
AC079325.6.csv	Acute Lymphoblastic Leukemia	rs56396656	17	72636916	A	G	0.0218222363810131	1.00309309438203	0.0731122744613323	7.7278e-43	0.0325304	0.0662738	0.810216
AC079325.6.csv	Acute Lymphoblastic Leukemia	rs62086681	17	72625639	A	G	0.0416978963673612	-0.417879	0.0542347903658344	1.3064e-14	0.0266341	-0.150603	0.618892
AC079325.6.csv	Acute Lymphoblastic Leukemia	rs7216055	17	72612988	T	C	0.115886605783866	0.576219480620114	0.0297820166850208	2.1273e-83	0.109675	0.252725	0.104537
AC079325.6.csv	Acute Lymphoblastic Leukemia	rs72844312	17	72559000	A	G	0.0488529331301051	0.529159261674617	0.0442237484162481	5.3937e-33	0.062868	0.317631	0.109267
AC079325.6.csv	Acute Lymphoblastic Leukemia	rs73354339	17	72520747	C	T	0.0338884585592564	-0.586457	0.0593267604691207	4.8165e-23	0.0367953	0.0373546	0.885569
AC079325.6.csv	Acute Lymphoblastic Leukemia	rs73361337	17	72690391	A	G	0.0251351119499013	0.464244319318822	0.0609380464564039	2.5724e-14	0.0271272	0.425674	0.148977
AC079325.6.csv	Acute Lymphoblastic Leukemia	rs75838240	17	72429917	T	G	0.031245142235349	0.50168404930702	0.068699374100597	2.8268e-13	0.0297937	0.100813	0.715048
AC079325.6.csv	Acute Lymphoblastic Leukemia	rs77064723	17	72592517	G	A	0.0512427847803039	-0.332858	0.0432541942372492	1.4083e-14	0.0467669	-0.240764	0.299455
AC079325.6.csv	Acute Lymphoblastic Leukemia	rs783251	17	72520687	A	G	0.0532201433312491	-0.382911	0.0478219908965184	1.1754e-15	0.039893	-0.00782437	0.975575
AC079325.6.csv	Acute Lymphoblastic Leukemia	rs905709	17	72563421	T	C	0.565541733999774	-0.728627	0.0192317297414214	1e-200	0.393497	-0.0941214	0.343737
AC079325.6.csv	Acute Lymphoblastic Leukemia	rs9635673	17	72498003	C	A	0.0784056316590563	0.328639935795014	0.0354634656086128	1.9181e-20	0.0757746	0.396271	0.0102169
AC079325.6.csv	Acute Lymphoblastic Leukemia	rs9896550	17	72574710	C	A	0.24923535708824	-0.157481	0.0227475775080066	4.4155e-12	0.226279	-0.0657441	0.571729
AC079325.6.csv	Acute Lymphoblastic Leukemia	rs9906564	17	72415814	C	T	0.771736632449824	0.161501972387271	0.022717000603051	1.1672e-12	0.186474	-0.030105	0.809361
AC079325.6.csv	Acute Lymphoblastic Leukemia	rs9912017	17	72483856	G	T	0.275768466126319	-0.137129	0.0220181521434938	4.7243e-10	0.273572	0.0223554	0.838032
AC079776.7.csv	Acute Lymphoblastic Leukemia	rs13005452	2	130659877	C	A	0.461286656058195	0.072042262568923	0.0130459350564853	3.3516e-08	0.422439	-0.128403	0.194778
AC079776.7.csv	Acute Lymphoblastic Leukemia	rs138040419	2	130773208	A	G	0.0558133794124907	-0.183562	0.0261763491888913	2.3393e-12	0.0945654	0.414076	0.0121986
AC079776.7.csv	Acute Lymphoblastic Leukemia	rs146060053	2	130810784	G	C	0.0148868598650258	-0.721001	0.116339264081317	5.7331e-10	0.00386864	0.594046	0.450324
AC079776.7.csv	Acute Lymphoblastic Leukemia	rs55841189	2	131117120	A	G	0.066840400056346	-0.169913	0.0237757425381383	8.8954e-13	0.050932	-0.261566	0.236491
AC079776.7.csv	Acute Lymphoblastic Leukemia	rs62163061	2	130865767	C	T	0.213308922433119	0.190829161616565	0.0197691016810041	4.7832e-22	0.266332	-0.178032	0.110009
AC079776.7.csv	Acute Lymphoblastic Leukemia	rs6431124	2	130733324	A	G	0.283150923943215	-0.189887	0.0124985625820686	3.9469e-52	0.383693	0.121343	0.223375
AC083949.1.csv	Acute Lymphoblastic Leukemia	rs12469447	2	42486097	T	G	0.670346884082588	0.242293084164734	0.0202808330332333	6.7474e-33	0.331785	0.0322259	0.754338
AC083949.1.csv	Acute Lymphoblastic Leukemia	rs12477845	2	42328304	A	G	0.0672966638408218	0.271876056416271	0.0432730719450358	3.3296e-10	0.0731986	-0.330431	0.0735817
AC083949.1.csv	Acute Lymphoblastic Leukemia	rs17028994	2	42134336	T	C	0.0829794430455861	-0.202922	0.0345581046678688	4.3057e-09	0.0948427	0.112835	0.499864
AC083949.1.csv	Acute Lymphoblastic Leukemia	rs17029121	2	42269859	G	A	0.273882835938734	0.125600156705611	0.0220672482220797	1.2585e-08	0.331704	-0.0445604	0.66813
AC083949.1.csv	Acute Lymphoblastic Leukemia	rs4362608	2	42133285	C	T	0.366592436023251	0.129101637600698	0.0197829629017757	6.764e-11	0.411751	-0.0169433	0.863193
AC083949.1.csv	Acute Lymphoblastic Leukemia	rs4952936	2	42370455	T	C	0.59051448757939	0.167261221071606	0.0193860871210382	6.2543e-18	0.452151	0.0158322	0.871944
AC083949.1.csv	Acute Lymphoblastic Leukemia	rs58729383	2	43110893	C	T	0.59916563310407	0.117703330670954	0.0194557391436004	1.4521e-09	0.384037	-0.0821386	0.411456
AC083949.1.csv	Acute Lymphoblastic Leukemia	rs62140208	2	42325560	A	G	0.585210838788248	-0.30253	0.019355872564742	4.548e-55	0.287848	0.155239	0.151035
AC083949.1.csv	Acute Lymphoblastic Leukemia	rs6544506	2	42361855	G	A	0.172951345638471	0.25307219709035	0.0252079005807468	1.025e-23	0.241758	-0.166419	0.141307
AC083949.1.csv	Acute Lymphoblastic Leukemia	rs74524334	2	42372987	A	G	0.0922088844712899	-0.201164	0.0329702170162556	1.0514e-09	0.0794512	-0.0633475	0.72864
AC083949.1.csv	Acute Lymphoblastic Leukemia	rs7595265	2	42705576	G	A	0.530723661284702	0.136625793058489	0.0197171132810658	4.2323e-12	0.511993	-0.0794534	0.416044
AC083949.1.csv	Acute Lymphoblastic Leukemia	rs78571808	2	42519603	G	A	0.0144309376555058	0.757924488755045	0.092893148601567	3.3781e-16	0.029855	-0.357457	0.194828
AC083949.1.csv	Acute Lymphoblastic Leukemia	rs79752205	2	42415237	T	C	0.0520681854903862	0.318088513967417	0.0429286629644139	1.2668e-13	0.0493162	-0.242498	0.287849
AC087793.1.csv	Acute Lymphoblastic Leukemia	rs10089299	8	144504609	C	G	0.712187	0.251300149064283	0.0255181459056533	7.0061e-23	0.265899	0.148966	0.173188
AC087793.1.csv	Acute Lymphoblastic Leukemia	rs10109061	8	144239859	G	A	0.422885683569253	-0.140148	0.0231252539602645	1.3561e-09	0.333486	-0.0866912	0.399753
AC087793.1.csv	Acute Lymphoblastic Leukemia	rs10746561	8	144296501	T	C	0.866170234770917	-0.231512	0.0339330681914617	8.9283e-12	0.0750602	-0.253238	0.169861
AC087793.1.csv	Acute Lymphoblastic Leukemia	rs11136289	8	144489224	A	G	0.513956209259569	0.187796346075603	0.0228604543056644	2.1252e-16	0.56955	0.125121	0.204718
AC087793.1.csv	Acute Lymphoblastic Leukemia	rs116803273	8	144466515	A	G	0.0338025165280444	0.378894782818031	0.0632482193466482	2.0907e-09	0.0238667	0.587806	0.0669114
AC087793.1.csv	Acute Lymphoblastic Leukemia	rs12155560	8	144336581	C	A	0.0389830508474576	0.513351617106009	0.059023572229173	3.3957e-18	0.0415278	-0.121893	0.611437
AC087793.1.csv	Acute Lymphoblastic Leukemia	rs13258820	8	144509169	G	A	0.0656351988395987	-0.314975	0.0461320005729885	8.6227e-12	0.0522785	-0.456555	0.0365831
AC087793.1.csv	Acute Lymphoblastic Leukemia	rs2235115	8	144378184	G	C	0.462891711477842	0.509858760162267	0.023170237545377	2.5906e-107	0.504786	0.0666399	0.491864
AC087793.1.csv	Acute Lymphoblastic Leukemia	rs2467893	8	144411843	T	G	0.0401598569112962	-0.317776	0.0581879950381284	4.7239e-08	0.0080328	-0.608942	0.282103
AC087793.1.csv	Acute Lymphoblastic Leukemia	rs34012614	8	144414151	A	G	0.0548926748262501	0.285904676104584	0.0501569552129019	1.1981e-08	0.0798276	-0.0368628	0.837451
AC087793.1.csv	Acute Lymphoblastic Leukemia	rs4874104	8	144449708	G	A	0.733986779120128	-0.256092	0.0258543245794565	3.9518e-23	0.194182	-0.0242851	0.842831
AC087793.1.csv	Acute Lymphoblastic Leukemia	rs55729006	8	144304583	C	A	0.0952709964686013	0.264021423231365	0.0389125163200242	1.1609e-11	0.121767	0.00319012	0.983048
AC087793.1.csv	Acute Lymphoblastic Leukemia	rs78856028	8	144303953	A	G	0.133361321018752	0.253380411159237	0.0339834242434599	8.9324e-14	0.198725	0.163607	0.181862
AC093609.1.csv	Acute Lymphoblastic Leukemia	rs17333759	2	43355901	A	C	0.220078350144092	0.207782478994407	0.0230117703274201	1.7293e-19	0.229517	-0.069742	0.544642
AC093609.1.csv	Acute Lymphoblastic Leukemia	rs17405731	2	43361450	G	A	0.0563698736940589	-0.348966	0.0426645781301593	2.8526e-16	0.1147	0.155929	0.30322
AC093609.1.csv	Acute Lymphoblastic Leukemia	rs190190134	2	43394091	G	A	0.0208940719144801	-0.486079	0.0750609135352013	9.4186e-11	0.0105105	1.00001	0.0428292
AC093609.1.csv	Acute Lymphoblastic Leukemia	rs62135413	2	43366874	C	T	0.665239005736138	-0.315496	0.0202283865752131	7.6535e-55	0.367998	0.169562	0.0912431
AC093609.1.csv	Acute Lymphoblastic Leukemia	rs66924593	2	43348382	G	A	0.159506191482936	-0.163463	0.0260498728649529	3.4919e-10	0.166087	0.132485	0.309633
AC108488.3.csv	Acute Lymphoblastic Leukemia	rs10210082	2	3498364	G	A	0.257421441328378	0.134501327734625	0.0245525506534428	4.3016e-08	0.406693	-0.109205	0.2735
AC108488.3.csv	Acute Lymphoblastic Leukemia	rs11123626	2	3626418	T	C	0.217466080642079	0.31132404003503	0.0231087981855115	2.2859e-41	0.200547	-0.254295	0.037313
AC108488.3.csv	Acute Lymphoblastic Leukemia	rs11676130	2	3682820	T	C	0.160995914003131	0.193630778963506	0.0261599582484674	1.3435e-13	0.184246	-0.082623	0.508067
AC108488.3.csv	Acute Lymphoblastic Leukemia	rs11691831	2	3628679	A	G	0.0265568708183222	-0.591668	0.0667646281540381	7.8451e-19	0.0364378	-0.107908	0.687974
AC108488.3.csv	Acute Lymphoblastic Leukemia	rs11902670	2	3647117	T	C	0.104816184796558	0.258606698230983	0.031121063122734	9.6025e-17	0.093027	-0.158573	0.349145
AC108488.3.csv	Acute Lymphoblastic Leukemia	rs13427265	2	3527027	G	A	0.677232395695677	0.139145111886423	0.0204063988570289	9.1932e-12	0.430355	-0.0281147	0.776183
AC108488.3.csv	Acute Lymphoblastic Leukemia	rs139351596	2	3611188	C	T	0.0196147997972631	0.496888997241249	0.0687564340013904	4.9524e-13	0.0102933	-0.0810222	0.867305
AC108488.3.csv	Acute Lymphoblastic Leukemia	rs142953961	2	3595141	C	G	0.177342913927534	0.238943872055476	0.0249601871989425	1.0385e-21	0.157195	-0.00140304	0.991628
AC108488.3.csv	Acute Lymphoblastic Leukemia	rs143443634	2	3489916	T	C	0.0189070786257782	-0.628982	0.0722477953556553	3.1479e-18	0.0147708	-0.258997	0.533699
AC108488.3.csv	Acute Lymphoblastic Leukemia	rs150794247	2	3584010	T	C	0.0324814624819288	-0.6134	0.0605539868399319	4.0665e-24	0.0371609	-0.183872	0.474484
AC108488.3.csv	Acute Lymphoblastic Leukemia	rs36160953	2	3528803	T	C	0.702267604985971	0.252321043323552	0.0234760926054663	6.056e-27	0.308263	-0.00373651	0.972183
AC108488.3.csv	Acute Lymphoblastic Leukemia	rs4583476	2	3608756	C	T	0.315344432334924	-0.843879	0.0205161588612114	1e-200	0.361823	0.147156	0.144953
AC108488.3.csv	Acute Lymphoblastic Leukemia	rs4850031	2	3630569	G	A	0.82836634221504	0.323046429412004	0.0252820483664512	2.1871e-37	0.22162	0.207547	0.0787227
AC108488.3.csv	Acute Lymphoblastic Leukemia	rs6542680	2	3640142	C	T	0.786345442187146	-0.217445	0.0232828458098212	9.6882e-21	0.351664	0.149514	0.147278
AC108488.3.csv	Acute Lymphoblastic Leukemia	rs6758656	2	3459371	G	A	0.211983041356691	0.146380847310174	0.0262646631816292	2.501e-08	0.231828	-0.171423	0.140075
AC108488.3.csv	Acute Lymphoblastic Leukemia	rs74842436	2	3614964	A	G	0.01809496917502	-0.758426	0.0730745295669123	3.0899e-25	0.0192085	0.522874	0.145822
AC108488.3.csv	Acute Lymphoblastic Leukemia	rs76118778	2	3620971	G	T	0.114020334836786	0.319690878795166	0.030001302451709	1.6383e-26	0.116544	-0.240769	0.11352
AC127904.2.csv	Acute Lymphoblastic Leukemia	rs113830110	3	196609984	C	A	0.0195479146768545	-0.60828	0.0825211974901543	1.691e-13	0.00720614	-0.335035	0.570171
AC127904.2.csv	Acute Lymphoblastic Leukemia	rs143607709	3	196652844	A	G	0.0171848614284295	0.945602561551172	0.0842978374267809	3.3573e-29	0.0330459	0.566314	0.00891271
AC127904.2.csv	Acute Lymphoblastic Leukemia	rs144162582	3	196635763	A	G	0.0258726496146104	-0.602916	0.0690490681899281	2.5065e-18	0.0323988	-0.492775	0.0799484
AC127904.2.csv	Acute Lymphoblastic Leukemia	rs145520759	3	196633033	A	G	0.0208133609162924	0.48283750204233	0.0820412726695886	3.9757e-09	0.0163848	-0.153063	0.692397
AC127904.2.csv	Acute Lymphoblastic Leukemia	rs35852602	3	196689660	A	G	0.300499477291207	0.271003098632728	0.0249179921139344	1.5033e-27	0.292509	0.243242	0.0236358
AC127904.2.csv	Acute Lymphoblastic Leukemia	rs505651	3	196704489	G	A	0.48508210623699	0.160104907799082	0.0228587409944293	2.4876e-12	0.50668	0.0694305	0.472951
AC127904.2.csv	Acute Lymphoblastic Leukemia	rs548853	3	196668359	T	C	0.385320756135142	-0.29134	0.0225026455003696	2.4432e-38	0.34675	-0.0596733	0.557572
AC127904.2.csv	Acute Lymphoblastic Leukemia	rs6421306	3	196591029	A	C	0.0362707279194429	0.653497731694792	0.0586949407834515	8.5894e-29	0.011359	0.347143	0.465101
AC127904.2.csv	Acute Lymphoblastic Leukemia	rs6790137	3	196573166	G	A	0.388546423135464	0.264161643548685	0.0224680743330628	6.4849e-32	0.350554	0.0939805	0.360712
AC127904.2.csv	Acute Lymphoblastic Leukemia	rs72611193	3	196540389	T	C	0.207413034163063	-0.200151	0.0270101856501542	1.2592e-13	0.185889	-0.103783	0.411958
AC127904.2.csv	Acute Lymphoblastic Leukemia	rs73893727	3	196717423	C	T	0.0801262778111846	0.2346679006289	0.0403431269132341	5.9985e-09	0.0792282	0.247064	0.172862
AC127904.2.csv	Acute Lymphoblastic Leukemia	rs7616401	3	196561452	A	G	0.105431038149109	0.240981240008248	0.0356597176608139	1.403e-11	0.0932716	-0.0993121	0.551502
AC127904.2.csv	Acute Lymphoblastic Leukemia	rs80182049	3	196624499	G	A	0.02019568489714	0.529028077778603	0.0778520562416085	1.0816e-11	0.01664	0.427489	0.255295
AC127904.2.csv	Acute Lymphoblastic Leukemia	rs9784336	3	196606541	T	A	0.485315767619191	-0.532179	0.0219201103832501	3.3318e-130	0.62987	0.036535	0.7191
AC131056.3.csv	Acute Lymphoblastic Leukemia	rs116916625	17	34976664	G	T	0.0202755225427535	0.834470224286856	0.0734077751052866	6.0632e-30	0.0159702	0.00448191	0.990702
AC131056.3.csv	Acute Lymphoblastic Leukemia	rs12949679	17	34938599	A	G	0.59653129010342	-0.14195	0.0194313585231248	2.7685e-13	0.367801	-0.138211	0.168905
AC131056.3.csv	Acute Lymphoblastic Leukemia	rs17680784	17	34469021	T	A	0.179296653431651	0.255245562395269	0.0279840767446108	7.4434e-20	0.210551	0.200878	0.110699
AC131056.3.csv	Acute Lymphoblastic Leukemia	rs211981	17	35002667	C	T	0.127513247397497	0.305821242176356	0.0285803560779369	1.0134e-26	0.09923	0.248208	0.126266
AC131056.3.csv	Acute Lymphoblastic Leukemia	rs28415667	17	34992969	C	T	0.0146078512056621	0.681120721887709	0.0988062264289126	5.4474e-12	0.0164841	0.107008	0.782912
AC131056.3.csv	Acute Lymphoblastic Leukemia	rs56353010	17	34472065	C	T	0.0196434256606176	-0.457133	0.0722271594368959	2.4644e-10	0.0150183	0.484787	0.247656
AC131056.3.csv	Acute Lymphoblastic Leukemia	rs57447586	17	34994891	C	T	0.091532874617737	-0.189378	0.0330734100027557	1.0283e-08	0.0891191	-0.199123	0.247961
AC131056.3.csv	Acute Lymphoblastic Leukemia	rs72820251	17	35056182	T	G	0.0196489678772491	0.42827976326591	0.0773445114524967	3.0735e-08	0.0268256	0.0896619	0.761309
AC131056.3.csv	Acute Lymphoblastic Leukemia	rs78832109	17	34967803	T	C	0.0435991657562817	0.380253829163863	0.0525691692929829	4.7105e-13	0.0543454	-0.085091	0.698782
AC131056.3.csv	Acute Lymphoblastic Leukemia	rs79010839	17	34901949	T	C	0.0609169297097544	0.264388378541421	0.0399004525280584	3.4491e-11	0.062443	-0.00872356	0.965079
AC131056.3.csv	Acute Lymphoblastic Leukemia	rs80130551	17	34833820	A	G	0.0259698069940761	-0.53429	0.0599382609919577	4.9135e-19	0.0249175	-0.191312	0.531721
AC131056.3.csv	Acute Lymphoblastic Leukemia	rs8064426	17	34819750	A	G	0.149268460119277	-0.455208	0.0269752787937015	6.8493e-64	0.217574	-0.219635	0.0615007
AC131056.3.csv	Acute Lymphoblastic Leukemia	rs875213	17	34955034	A	G	0.129199063939005	0.401698924473648	0.0284207531111962	2.3511e-45	0.148713	0.24705	0.0720941
AC131971.1.csv	Acute Lymphoblastic Leukemia	rs2283231	11	2916715	T	A	0.150515540944411	0.197967077421017	0.0319492402596739	5.7843e-10	0.16828	0.0316281	0.808676
AC131971.1.csv	Acute Lymphoblastic Leukemia	rs429886	11	2929552	A	G	0.254340902085688	0.214389141758106	0.0230179452177481	1.2311e-20	0.214839	0.0724105	0.539146
AC131971.1.csv	Acute Lymphoblastic Leukemia	rs7112509	11	3010861	C	T	0.0974209870482951	0.874626959447921	0.033780858339819	8.367e-148	0.0744378	0.352016	0.0579375
AC131971.1.csv	Acute Lymphoblastic Leukemia	rs72844069	11	3126812	A	C	0.113314832952443	0.292638080862404	0.0329952397495128	7.3806e-19	0.083557	0.439743	0.0138599
AC131971.1.csv	Acute Lymphoblastic Leukemia	rs739401	11	3036324	T	C	0.514146806482364	0.211419479572272	0.0200200257160972	4.5569e-26	0.39151	0.0447042	0.654106
AC131971.1.csv	Acute Lymphoblastic Leukemia	rs77482583	11	2896452	A	G	0.0216231509174683	0.499552346546165	0.0688211865135857	3.9112e-13	0.00973669	0.784517	0.124503
AC144831.1.csv	Acute Lymphoblastic Leukemia	rs113262664	17	81059510	A	G	0.0623480797277589	0.621147064150919	0.0548580796402761	1.0119e-29	0.0763645	0.385317	0.0365856
AC144831.1.csv	Acute Lymphoblastic Leukemia	rs149143300	17	80976194	T	C	0.0171930916446242	-0.45572	0.0733553938157362	5.2115e-10	0.0256014	0.232794	0.438293
AC144831.1.csv	Acute Lymphoblastic Leukemia	rs4986096	17	81003759	T	C	0.104205827067669	0.28911333883899	0.0312099464391418	1.9802e-20	0.127794	0.310835	0.0327378
AC144831.1.csv	Acute Lymphoblastic Leukemia	rs4986106	17	81030393	C	T	0.0818467211480965	-0.271056	0.0350564260844661	1.057e-14	0.0879101	-0.271951	0.116267
AC144831.1.csv	Acute Lymphoblastic Leukemia	rs7405957	17	80990787	T	C	0.553656349886957	-0.149586	0.0191765239063335	6.1614e-15	0.462461	-0.0421128	0.66459
AC144831.1.csv	Acute Lymphoblastic Leukemia	rs9913284	17	80938920	T	G	0.523927005012531	-0.124468	0.0190928595037553	7.0683e-11	0.448984	-0.0230918	0.812001
ACACB.csv	Acute Lymphoblastic Leukemia	rs10849923	12	109450137	C	T	0.37239544013287	0.0757152703294927	0.0082323366998459	3.674e-20	0.38248	-0.0200499	0.843165
ACACB.csv	Acute Lymphoblastic Leukemia	rs10850732	12	110219998	C	T	0.351991693411365	-0.0514849	0.00833412502040534	6.5001e-10	0.347087	-0.125281	0.222112
ACACB.csv	Acute Lymphoblastic Leukemia	rs10861977	12	109304614	T	A	0.676957485854106	-0.095033	0.00855621164502533	1.1599e-28	0.314684	-0.0282083	0.786841
ACACB.csv	Acute Lymphoblastic Leukemia	rs11066507	12	109471911	T	C	0.263989627569619	0.0639449842071877	0.00901217467756401	1.2916e-12	0.237315	-0.0128964	0.910575
ACACB.csv	Acute Lymphoblastic Leukemia	rs11114100	12	109322051	A	T	0.0713509527690457	-0.173133	0.0156418471834304	1.7777e-28	0.0785582	-0.32066	0.0766514
ACACB.csv	Acute Lymphoblastic Leukemia	rs112545476	12	109448412	G	A	0.017017594462071	-0.419531	0.0591538834630707	1.3181e-12	0.0281057	0.0135048	0.964269
ACACB.csv	Acute Lymphoblastic Leukemia	rs112634731	12	109292973	G	A	0.0603075973911511	0.115047541078816	0.0178254971380698	1.0894e-10	0.0521696	0.115747	0.596196
ACACB.csv	Acute Lymphoblastic Leukemia	rs11609590	12	109557654	T	C	0.0928462709284627	0.207508516148931	0.0142136908973732	2.8499e-48	0.114023	0.244206	0.107439
ACACB.csv	Acute Lymphoblastic Leukemia	rs117645666	12	109525334	A	G	0.0221139430284858	0.175073099778475	0.0288637539821079	1.3163e-09	0.0145352	-0.0150478	0.970775
ACACB.csv	Acute Lymphoblastic Leukemia	rs117983234	12	109813103	A	G	0.0220047472664306	-0.208991	0.0274768195548486	2.8227e-14	0.0173836	-0.595899	0.113452
ACACB.csv	Acute Lymphoblastic Leukemia	rs118014788	12	109611786	T	G	0.0328749181401441	-0.559042	0.0237075941382166	6.0671e-123	0.0413557	-0.150768	0.533498
ACACB.csv	Acute Lymphoblastic Leukemia	rs12304751	12	109659177	G	A	0.0477873030583874	-0.392114	0.0188358031651596	2.9983e-96	0.0446232	0.0280169	0.904123
ACACB.csv	Acute Lymphoblastic Leukemia	rs12821585	12	109886361	C	T	0.10292896504869	-0.168284	0.0130970163454744	8.7129e-38	0.0646766	-0.00322548	0.986903
ACACB.csv	Acute Lymphoblastic Leukemia	rs1344542	12	110082154	G	A	0.528430230373182	0.0695376764353947	0.00795789481076134	2.3727e-18	0.570151	0.166583	0.0915883
ACACB.csv	Acute Lymphoblastic Leukemia	rs141621553	12	109432213	T	C	0.0139445423946145	0.465465903856738	0.0539833345538061	6.568e-18	0.0176055	0.524296	0.16186
ACACB.csv	Acute Lymphoblastic Leukemia	rs147874197	12	109740428	G	A	0.0142371234207969	0.397852714424889	0.0481527800279449	1.4301e-16	0.00742288	-0.106172	0.850618
ACACB.csv	Acute Lymphoblastic Leukemia	rs150651241	12	109688046	G	A	0.0278963730569948	0.157469119083438	0.0251283182401044	3.6949e-10	0.0300711	0.25118	0.377372
ACACB.csv	Acute Lymphoblastic Leukemia	rs1541597	12	110044918	T	G	0.21564684657596	0.0922721589084621	0.00965957863034024	1.2673e-21	0.250664	0.0633036	0.572443
ACACB.csv	Acute Lymphoblastic Leukemia	rs17848802	12	109634834	G	A	0.0302888185406652	-0.164101	0.02356255569764	3.2934e-12	0.0173363	-0.181537	0.629457
ACACB.csv	Acute Lymphoblastic Leukemia	rs17848835	12	109692053	T	C	0.102020972354623	-0.115151	0.0132048966736487	2.7722e-18	0.120587	-0.192329	0.196251
ACACB.csv	Acute Lymphoblastic Leukemia	rs183610547	12	109830859	T	C	0.0166526138279933	0.290999080638702	0.0356306498804596	3.1615e-16	0.0195651	0.00747364	0.98364
ACACB.csv	Acute Lymphoblastic Leukemia	rs1866061	12	109769681	G	C	0.411992598589106	0.0964728028618801	0.00815747975798687	2.8579e-32	0.482776	-4.88591e-05	0.999604
ACACB.csv	Acute Lymphoblastic Leukemia	rs2066925	12	109690314	T	A	0.256606894477651	-0.151635	0.0090965436985917	2.1805e-62	0.240876	-0.119393	0.292806
ACACB.csv	Acute Lymphoblastic Leukemia	rs2239608	12	109646722	C	A	0.710455109173588	-0.174475	0.00875868133851924	2.7082e-88	0.305445	-0.0865732	0.410491
ACACB.csv	Acute Lymphoblastic Leukemia	rs2268389	12	109643152	G	A	0.916703995699695	0.114924746946379	0.0154593418006966	1.0552e-13	0.0689591	-0.156076	0.429718
ACACB.csv	Acute Lymphoblastic Leukemia	rs2284684	12	109686945	A	G	0.182731151130743	0.240687815438287	0.01029944864728	8.8347e-121	0.148374	0.205511	0.133389
ACACB.csv	Acute Lymphoblastic Leukemia	rs2436630	12	109562460	A	G	0.759273178247961	-0.171043	0.00929188293462596	1.1375e-75	0.273581	0.0322061	0.768998
ACACB.csv	Acute Lymphoblastic Leukemia	rs2569987	12	109541171	C	T	0.161678115799804	0.204042075289195	0.0108099470892906	1.8243e-79	0.14502	-0.0171911	0.901184
ACACB.csv	Acute Lymphoblastic Leukemia	rs34268	12	109597157	A	G	0.0778120184899846	0.540487153430409	0.0148296851375972	1e-200	0.066608	-0.224672	0.248084
ACACB.csv	Acute Lymphoblastic Leukemia	rs3742027	12	109670468	T	C	0.105783866057839	0.202784329914431	0.0129837645527638	5.4729e-55	0.110004	0.323135	0.0371732
ACACB.csv	Acute Lymphoblastic Leukemia	rs4964774	12	109321871	A	G	0.355925968947226	0.0970546155276561	0.00840125130082547	7.1787e-31	0.39903	-0.0071772	0.942624
ACACB.csv	Acute Lymphoblastic Leukemia	rs55741498	12	109508857	G	A	0.0320560637587845	0.206068710960144	0.0229682353749088	2.9171e-19	0.0217183	-0.52155	0.123303
ACACB.csv	Acute Lymphoblastic Leukemia	rs7300609	12	109531947	A	T	0.192438370644418	-0.525352	0.0100961387744643	1e-200	0.19846	-0.0874487	0.473849
ACACB.csv	Acute Lymphoblastic Leukemia	rs73190700	12	109816620	A	G	0.0610520682009328	-0.0928941	0.0167111834347928	2.7132e-08	0.0468301	0.0105159	0.963959
ACACB.csv	Acute Lymphoblastic Leukemia	rs73191161	12	109658191	A	G	0.057542021392709	0.166184761108865	0.0181525479370463	5.4459e-20	0.0416809	-0.256592	0.284963
ACACB.csv	Acute Lymphoblastic Leukemia	rs73191162	12	109660598	T	C	0.0239693571315748	-0.378942	0.0265152321583296	2.4687e-46	0.0225023	-0.387789	0.241484
ACACB.csv	Acute Lymphoblastic Leukemia	rs73191229	12	108991132	A	G	0.0443191975369947	-0.159861	0.021638161858446	1.4905e-13	0.0447239	-0.110434	0.637879
ACACB.csv	Acute Lymphoblastic Leukemia	rs73195443	12	109331462	T	C	0.0118411000763942	-0.512461	0.0682899413649212	6.1805e-14	0.00262961	-1.05697	0.235289
ACACB.csv	Acute Lymphoblastic Leukemia	rs73195455	12	109501365	C	A	0.0160510691956076	-0.456329	0.0362381608375641	2.3191e-36	0.0176424	-0.0670513	0.856336
ACACB.csv	Acute Lymphoblastic Leukemia	rs73413016	12	109432722	A	G	0.0212052701333125	0.178908237637692	0.0279990355938671	1.6632e-10	0.0201866	-0.189716	0.587365
ACACB.csv	Acute Lymphoblastic Leukemia	rs74193321	12	109334003	C	T	0.389132158091427	0.0707084329799508	0.00816306083813794	4.6356e-18	0.406745	-0.0247785	0.80283
ACACB.csv	Acute Lymphoblastic Leukemia	rs76271636	12	109886494	T	C	0.0411930526507229	0.13790312814549	0.0216257571423738	1.8083e-10	0.0401016	-0.00737667	0.976756
ACACB.csv	Acute Lymphoblastic Leukemia	rs76479862	12	110071748	T	C	0.166710511481078	0.0667408423956912	0.0106582414915108	3.8056e-10	0.144588	0.0285515	0.836493
ACACB.csv	Acute Lymphoblastic Leukemia	rs76977286	12	109829657	C	T	0.115690937228702	0.120817262311499	0.0124425604852213	2.7387e-22	0.0918645	-0.101832	0.544733
ACACB.csv	Acute Lymphoblastic Leukemia	rs77569767	12	109622363	G	A	0.0651538265954742	0.100422057905373	0.0169203130421859	2.9385e-09	0.0590554	-0.0467956	0.824436
ACACB.csv	Acute Lymphoblastic Leukemia	rs825005	12	110139500	T	G	0.180765906272314	-0.107163	0.0103229239889589	3.0196e-25	0.128497	-0.148055	0.304106
ACAD8.csv	Acute Lymphoblastic Leukemia	rs112509884	11	134125949	T	C	0.0142430949860456	-0.274934	0.0495528889928315	2.883e-08	0.00208131	0.078737	0.941911
ACAD8.csv	Acute Lymphoblastic Leukemia	rs113825217	11	134180440	A	G	0.0161472448057814	-0.477565	0.0379755049964878	2.8688e-36	0.00520766	0.28616	0.668024
ACAD8.csv	Acute Lymphoblastic Leukemia	rs117392808	11	134170851	A	G	0.0278863096606144	-0.192238	0.0247057527759442	7.184e-15	0.0536608	0.0191474	0.929149
ACAD8.csv	Acute Lymphoblastic Leukemia	rs117622121	11	133968621	A	G	0.0283916513198281	0.286745579244614	0.0259491216749422	2.1873e-28	0.0158335	-0.0297576	0.940687
ACAD8.csv	Acute Lymphoblastic Leukemia	rs117678455	11	134013147	T	G	0.0134607480476778	-0.339186	0.0517525138505696	5.5941e-11	0.00304316	-0.24639	0.780678
ACAD8.csv	Acute Lymphoblastic Leukemia	rs12290171	11	134097161	T	C	0.04850400337126	0.226748243516176	0.019726158220776	1.4011e-30	0.0309271	0.465652	0.0957878
ACAD8.csv	Acute Lymphoblastic Leukemia	rs1259022	11	134105030	A	G	0.214513886279078	-0.29381	0.00982811810276925	2.2855e-196	0.264757	-0.126789	0.249958
ACAD8.csv	Acute Lymphoblastic Leukemia	rs138123223	11	134164046	T	C	0.0495650940720431	-0.402046	0.0204959286195456	1.1289e-85	0.0792941	-0.21842	0.223749
ACAD8.csv	Acute Lymphoblastic Leukemia	rs139150736	11	134043834	T	C	0.0318667025475422	0.220604835885877	0.0247731427159884	5.3386e-19	0.0539427	0.286963	0.18346
ACAD8.csv	Acute Lymphoblastic Leukemia	rs139327854	11	134114822	T	C	0.0141871592299989	0.505142874609785	0.0667489725692784	3.796e-14	0.0148746	-0.214938	0.593586
ACAD8.csv	Acute Lymphoblastic Leukemia	rs141940391	11	134144370	C	A	0.0178997055662009	0.279040367723226	0.0333916147384374	6.4661e-17	0.0156541	-0.8754	0.0252895
ACAD8.csv	Acute Lymphoblastic Leukemia	rs147745316	11	134044688	A	G	0.0175345094068113	0.281540207101474	0.0356204161365242	2.7053e-15	0.0196532	-0.231275	0.513997
ACAD8.csv	Acute Lymphoblastic Leukemia	rs2305379	11	134073019	T	A	0.271676626451686	-0.109261	0.00906970587724891	2.0163e-33	0.323393	-0.0240444	0.817305
ACAD8.csv	Acute Lymphoblastic Leukemia	rs2510356	11	134177275	C	T	0.22501785110301	-0.176571	0.00966079779150771	1.2572e-74	0.200065	0.0146013	0.904353
ACAD8.csv	Acute Lymphoblastic Leukemia	rs2846633	11	133921465	G	T	0.611283563557349	-0.0604608	0.00839127253936086	5.7959e-13	0.344576	-0.234344	0.0223121
ACAD8.csv	Acute Lymphoblastic Leukemia	rs2850255	11	134155539	T	C	0.22751949839425	-0.134153	0.00969482704470886	1.5075e-43	0.270952	-0.016362	0.881483
ACAD8.csv	Acute Lymphoblastic Leukemia	rs492761	11	134117015	T	C	0.0293441177598037	-0.195454	0.024109907675124	5.1885e-16	0.028093	-0.175676	0.548713
ACAD8.csv	Acute Lymphoblastic Leukemia	rs55683807	11	134028447	A	G	0.0294444136093689	0.215590310560607	0.0281185192196117	1.7579e-14	0.0327471	0.491331	0.0671506
ACAD8.csv	Acute Lymphoblastic Leukemia	rs59246351	11	134159345	A	G	0.13580083802046	0.103736725472007	0.0117989906132856	1.4692e-18	0.136152	-0.0175034	0.901763
ACAD8.csv	Acute Lymphoblastic Leukemia	rs61703311	11	134108059	T	G	0.305990977213641	0.332114738864943	0.00881974991541655	1e-200	0.294374	0.0413754	0.696166
ACAD8.csv	Acute Lymphoblastic Leukemia	rs694410	11	133934995	G	A	0.257482466155603	-0.0895259	0.00955656104796957	7.378e-21	0.358146	-0.144195	0.15624
ACAD8.csv	Acute Lymphoblastic Leukemia	rs71472112	11	133918788	A	G	0.0463953815826528	-0.164521	0.0210859302766949	6.0645e-15	0.0573729	-0.0972798	0.64705
ACAD8.csv	Acute Lymphoblastic Leukemia	rs71486991	11	134028798	G	A	0.0359606116004653	-0.184096	0.0226231765027226	4.0319e-16	0.0450595	-0.295385	0.203467
ACAD8.csv	Acute Lymphoblastic Leukemia	rs75269604	11	133992804	A	C	0.0191122903269326	0.300438861650761	0.0318153657288589	3.6226e-21	0.0325315	0.151356	0.585154
ACBD4.csv	Acute Lymphoblastic Leukemia	rs112560196	17	44200078	T	A	0.195176266324451	-0.0551339	0.0100413174962522	4.0012e-08	0.0823999	0.22171	0.213003
ACBD4.csv	Acute Lymphoblastic Leukemia	rs139981906	17	43252998	T	C	0.0247230762751127	0.14969894850913	0.0268248841538778	2.3969e-08	0.0252035	0.064091	0.839521
ACBD4.csv	Acute Lymphoblastic Leukemia	rs2291447	17	43212963	G	T	0.507155879671832	-0.127354	0.00860512124682884	1.4692e-49	0.577599	0.158251	0.107195
ACBD4.csv	Acute Lymphoblastic Leukemia	rs4793164	17	43001426	C	A	0.211915009111706	0.0548383609509182	0.00984866668179777	2.5768e-08	0.245605	-0.190299	0.0933813
ACBD4.csv	Acute Lymphoblastic Leukemia	rs58334749	17	43064174	C	G	0.868228708886524	0.0946900968878386	0.0127957861228684	1.3618e-13	0.116508	-0.196758	0.197496
ACBD4.csv	Acute Lymphoblastic Leukemia	rs62066673	17	43201425	T	C	0.165703930229924	-0.0982995	0.0107047428946313	4.1925e-20	0.143892	0.0711829	0.61054
ACD.csv	Acute Lymphoblastic Leukemia	rs12596500	16	68299771	A	G	0.0886362778050531	-0.100641	0.0140057434872448	6.6815e-13	0.0680696	-0.103972	0.587119
ACD.csv	Acute Lymphoblastic Leukemia	rs12934863	16	68077071	G	A	0.479193579956939	-0.0837442	0.00808888663630082	4.0557e-25	0.496662	0.024583	0.799493
ACD.csv	Acute Lymphoblastic Leukemia	rs141791102	16	67810985	C	T	0.0539485442829594	-0.201544	0.0192869187546012	1.4683e-25	0.103073	0.275211	0.0888158
ACD.csv	Acute Lymphoblastic Leukemia	rs28571100	16	67028008	G	A	0.0888922713954108	-0.103103	0.0140320672714799	2.015e-13	0.106463	0.284341	0.0694464
ACD.csv	Acute Lymphoblastic Leukemia	rs28711261	16	67617186	G	A	0.124075192510947	-0.221348	0.0120723677080428	4.3342e-75	0.15486	0.219577	0.10548
ACER1.csv	Acute Lymphoblastic Leukemia	rs1982082	19	6322442	C	T	0.388787209990849	-0.106085	0.0104914203961441	4.9076e-24	0.372541	0.236031	0.0185729
ACER1.csv	Acute Lymphoblastic Leukemia	rs62106623	19	6335509	T	C	0.119211563731932	0.121983664653527	0.0159953403600125	2.4215e-14	0.121594	-0.169146	0.251507
ACER1.csv	Acute Lymphoblastic Leukemia	rs72981971	19	6312290	C	T	0.141179802204505	0.0805600590041234	0.0134738349229174	2.2479e-09	0.227026	-0.131408	0.258904
ACOT7.csv	Acute Lymphoblastic Leukemia	rs11121972	1	6562491	C	A	0.080526197436474	0.199513460097672	0.0157248270068627	6.9276e-37	0.134051	-0.268403	0.0625547
ACOT7.csv	Acute Lymphoblastic Leukemia	rs12045992	1	6568870	G	A	0.241012084592145	0.0536786608844358	0.00930709334797327	8.0504e-09	0.268967	-0.155955	0.154049
ACOT7.csv	Acute Lymphoblastic Leukemia	rs140688679	1	6654589	T	C	0.0380025125628141	0.268883588744261	0.0211596069018258	5.3793e-37	0.0721747	-0.202251	0.283795
ACOT7.csv	Acute Lymphoblastic Leukemia	rs143386390	1	6146588	T	C	0.0303097625999746	0.269183112245891	0.0285787357730004	4.554e-21	0.04818	-0.289298	0.206283
ACOT7.csv	Acute Lymphoblastic Leukemia	rs4908550	1	6463999	G	C	0.0892921469740634	0.335386344299363	0.015012145575371	1.477e-110	0.0932072	-0.193651	0.248579
ACOT7.csv	Acute Lymphoblastic Leukemia	rs58220981	1	6401026	A	G	0.0390189265795008	-0.150972	0.0222442925927664	1.1433e-11	0.0416002	0.25294	0.289148
ACOT7.csv	Acute Lymphoblastic Leukemia	rs6577566	1	6307389	C	T	0.22414851181344	0.0685415413807462	0.0108044927930808	2.2446e-10	0.214755	-0.151713	0.196613
ACP6.csv	Acute Lymphoblastic Leukemia	rs10494246	1	147148304	C	T	0.0345894964267908	0.335882806253058	0.0324004790628613	3.5182e-25	0.0369725	0.197575	0.44204
ACP6.csv	Acute Lymphoblastic Leukemia	rs11240083	1	147051058	A	G	0.236434550989346	-0.137766	0.0139348069320355	4.7592e-23	0.211933	0.110068	0.355975
ACP6.csv	Acute Lymphoblastic Leukemia	rs11240115	1	147212431	A	G	0.760118756811605	-0.132491	0.013865664605892	1.2311e-21	0.218652	0.0033939	0.976844
ACP6.csv	Acute Lymphoblastic Leukemia	rs11586154	1	147165238	C	T	0.220954356846473	0.175082993355771	0.0142717515247861	1.3487e-34	0.243222	-0.169745	0.13625
ACP6.csv	Acute Lymphoblastic Leukemia	rs116021359	1	147811258	T	C	0.0700047744091669	-0.144552	0.0234846023281711	7.4888e-10	0.0443129	0.560898	0.00300455
ACP6.csv	Acute Lymphoblastic Leukemia	rs116523799	1	147076716	T	C	0.050085992738391	-0.428281	0.0271443391001192	4.4094e-56	0.04196	0.107683	0.660081
ACP6.csv	Acute Lymphoblastic Leukemia	rs11800736	1	147131103	T	C	0.0456514305254759	-0.523589	0.0283660492181172	4.4637e-76	0.0222926	0.479918	0.146035
ACP6.csv	Acute Lymphoblastic Leukemia	rs12022413	1	146997245	C	A	0.702777882193738	0.0961563350452079	0.0129575031391351	1.1641e-13	0.404655	-0.0730552	0.460773
ACP6.csv	Acute Lymphoblastic Leukemia	rs12045593	1	147319531	T	C	0.0329958970819433	-0.406185	0.0332467121994288	2.5098e-34	0.071464	0.214312	0.251854
ACP6.csv	Acute Lymphoblastic Leukemia	rs12132534	1	147098986	G	C	0.153548508871272	0.192665313510038	0.0164254255019342	8.9882e-32	0.0850093	-0.230419	0.186983
ACP6.csv	Acute Lymphoblastic Leukemia	rs12736102	1	146729348	C	T	0.330351773902586	-0.095383	0.0125883230083356	3.5309e-14	0.318311	0.0330065	0.751678
ACP6.csv	Acute Lymphoblastic Leukemia	rs143363112	1	147161205	C	T	0.0197092326139089	-0.406379	0.0500448594282733	4.6465e-16	0.0336701	-0.377526	0.168539
ACP6.csv	Acute Lymphoblastic Leukemia	rs143737455	1	147331332	G	A	0.0243665640539901	0.242622597487889	0.0393893430560245	7.2929e-10	0.0139823	-0.539016	0.192974
ACP6.csv	Acute Lymphoblastic Leukemia	rs148127209	1	147112584	A	G	0.016102858569467	0.356210211701792	0.0571866961585179	4.7002e-10	0.00495671	-0.559268	0.409607
ACP6.csv	Acute Lymphoblastic Leukemia	rs2236570	1	147093887	A	G	0.691307452365741	-0.485953	0.0128168372388922	1e-200	0.299126	0.243761	0.0209469
ACP6.csv	Acute Lymphoblastic Leukemia	rs41295835	1	147092881	T	C	0.0642634031440422	0.215109654564278	0.028366981124379	3.3765e-14	0.103307	-0.187083	0.239042
ACP6.csv	Acute Lymphoblastic Leukemia	rs510253	1	146518596	C	T	0.259564182937422	0.0874284845351124	0.0135126944769188	9.8003e-11	0.263494	-0.0502799	0.646895
ACP6.csv	Acute Lymphoblastic Leukemia	rs60322015	1	147163628	T	A	0.0262706043956044	0.372288786603883	0.0471747261811628	2.9834e-15	0.00598644	-0.648873	0.307496
ACP6.csv	Acute Lymphoblastic Leukemia	rs627219	1	147073355	C	A	0.0618652067207853	-0.295891	0.02458446541603	2.3039e-33	0.0934029	0.264594	0.106177
ACP6.csv	Acute Lymphoblastic Leukemia	rs628928	1	147056280	C	A	0.066824623754991	0.20835975255188	0.0268066119304592	7.6891e-15	0.0483365	-0.431236	0.0518848
ACP6.csv	Acute Lymphoblastic Leukemia	rs6666306	1	147029474	A	G	0.315900766529472	-0.183856	0.012741254880344	3.3411e-47	0.301103	0.077292	0.466777
ACP6.csv	Acute Lymphoblastic Leukemia	rs6677900	1	147379162	G	A	0.699244060475162	0.0903275352441525	0.0134718691172355	2.0168e-11	0.307021	-0.116819	0.269375
ACP6.csv	Acute Lymphoblastic Leukemia	rs72700325	1	147100693	T	C	0.0260492040520984	0.309863692655901	0.0436722985477367	1.2916e-12	0.0628897	-0.0443025	0.824116
ACP6.csv	Acute Lymphoblastic Leukemia	rs75975267	1	147157618	A	G	0.0297099079740272	-0.409062	0.040346588928516	3.7164e-24	0.00927235	0.0174484	0.972825
ACP6.csv	Acute Lymphoblastic Leukemia	rs76390540	1	147150770	A	G	0.0273017512559275	-0.480216	0.0404729710189615	1.7947e-32	0.0343276	0.654138	0.0150567
ACP6.csv	Acute Lymphoblastic Leukemia	rs76669808	1	147068704	A	G	0.0191425260718424	-0.36333	0.0439999444651545	1.4863e-16	0.0107102	-0.13905	0.766408
ACP6.csv	Acute Lymphoblastic Leukemia	rs77650336	1	147096505	T	C	0.0239780041775012	-0.918415	0.0387028763760954	1.7679e-124	0.0218504	0.0550134	0.867822
ACP6.csv	Acute Lymphoblastic Leukemia	rs78082897	1	147058901	T	C	0.0284870811465482	0.262300924251066	0.0411678449738783	1.8731e-10	0.0440665	0.22842	0.345897
ACP6.csv	Acute Lymphoblastic Leukemia	rs78712378	1	147107250	T	C	0.0424025549270845	0.241208300779158	0.0293837543128991	2.2341e-16	0.0297004	-0.267328	0.355108
ACP6.csv	Acute Lymphoblastic Leukemia	rs79372002	1	147169202	T	G	0.0817138891157018	0.148802762123382	0.0230038589684602	9.8915e-11	0.0588411	0.0216514	0.917093
ACP6.csv	Acute Lymphoblastic Leukemia	rs79495255	1	147141696	T	C	0.0179294928514879	-0.514427	0.0446210154099648	9.4451e-31	0.00743718	0.266251	0.639626
ACSF2.csv	Acute Lymphoblastic Leukemia	rs111454069	17	48487350	T	C	0.0590952723782097	-0.109528	0.0172909378414717	2.3796e-10	0.0303636	0.684313	0.0177967
ACSF2.csv	Acute Lymphoblastic Leukemia	rs113636322	17	48397787	T	C	0.100302379247235	0.0752757181542251	0.0135429390558669	2.7257e-08	0.0938375	-0.0270136	0.871767
ACSF2.csv	Acute Lymphoblastic Leukemia	rs117311956	17	48599766	C	T	0.0132939438700148	-0.381907	0.0602775707380637	2.3611e-10	0.0101549	-0.493419	0.332116
ACSF2.csv	Acute Lymphoblastic Leukemia	rs17776853	17	48446130	G	A	0.183607609270023	-0.117844	0.010279210924003	1.9913e-30	0.115627	-0.140295	0.352413
ACSF2.csv	Acute Lymphoblastic Leukemia	rs2079270	17	48395982	T	C	0.560036078018715	-0.0500231	0.00800291979943293	4.0836e-10	0.478835	-0.236211	0.0152114
ACSF2.csv	Acute Lymphoblastic Leukemia	rs2412315	17	48480097	A	G	0.149837569271928	0.0870863456243316	0.0112090337127324	7.8983e-15	0.157988	0.077333	0.560541
ACSF2.csv	Acute Lymphoblastic Leukemia	rs55772291	17	48507975	A	G	0.0998407773332245	-0.21704	0.0137168073462858	2.1595e-56	0.0997092	-0.259054	0.112599
ACSF2.csv	Acute Lymphoblastic Leukemia	rs62059698	17	48617493	G	A	0.185294449246496	0.0768376369634043	0.0102242970198271	5.6911e-14	0.235205	0.107211	0.348576
ACSF2.csv	Acute Lymphoblastic Leukemia	rs77582421	17	48499073	C	A	0.0399969213402432	0.201116995425957	0.0230242696538016	2.4409e-18	0.0594995	0.18661	0.366547
ACSF2.csv	Acute Lymphoblastic Leukemia	rs8065691	17	48603914	T	C	0.518824567104591	0.0546632639353203	0.00867464316993101	2.9497e-10	0.480193	0.0172673	0.859341
ACSF2.csv	Acute Lymphoblastic Leukemia	rs873839	17	48631857	A	G	0.219802204439076	-0.119835	0.00961058813312252	1.0992e-35	0.233216	-0.0956862	0.402821
ACSF2.csv	Acute Lymphoblastic Leukemia	rs898454	17	48542572	C	G	0.51751604379011	0.173120458279107	0.0079648712143317	9.4952e-105	0.522994	0.179864	0.0644926
ACSF2.csv	Acute Lymphoblastic Leukemia	rs9903959	17	48501657	A	G	0.493799090533278	-0.0852534	0.00794563107617125	7.3915e-27	0.483687	-0.128704	0.186792
ACSM1.csv	Acute Lymphoblastic Leukemia	rs111881062	16	21163517	T	C	0.0257430883052827	-0.162139	0.0266956589849594	1.2492e-09	0.0318174	-0.341643	0.213905
ACSM1.csv	Acute Lymphoblastic Leukemia	rs117745671	16	20786745	C	G	0.029604089882297	0.286450922340287	0.0240488718466894	1.0373e-32	0.0498219	-0.00132881	0.995269
ACSM1.csv	Acute Lymphoblastic Leukemia	rs12597704	16	21095809	G	A	0.257860295825912	0.0634798514299299	0.00922725906010958	6.0105e-12	0.30862	0.0572482	0.590249
ACSM1.csv	Acute Lymphoblastic Leukemia	rs163242	16	20645015	G	A	0.191107937462417	0.244328496136824	0.0101381539399261	2.5118e-128	0.188349	0.0962353	0.437834
ACSM1.csv	Acute Lymphoblastic Leukemia	rs163256	16	20687543	T	C	0.166559667673716	-0.118789	0.0107202866470398	1.5513e-28	0.202721	-0.148375	0.222743
ACSM1.csv	Acute Lymphoblastic Leukemia	rs2283517	16	21220404	T	C	0.894772445413206	0.0715447849009691	0.0129901926249127	3.6376e-08	0.059636	-0.190909	0.356198
ACSM1.csv	Acute Lymphoblastic Leukemia	rs28676764	16	20597619	C	T	0.0268662570270624	0.218220846769418	0.026224684753331	8.7077e-17	0.0164705	0.21726	0.559298
ACSM1.csv	Acute Lymphoblastic Leukemia	rs7499304	16	20564390	T	G	0.295727334490828	-0.0731005	0.00875014900934655	6.5878e-17	0.330751	-0.166091	0.109143
ACSM1.csv	Acute Lymphoblastic Leukemia	rs78044532	16	21168467	T	C	0.0182112337177466	0.236766851621608	0.0310709497941797	2.5328e-14	0.0109656	0.782733	0.100661
ACSM1.csv	Acute Lymphoblastic Leukemia	rs858195	16	21068070	T	C	0.305422977188169	-0.0531773	0.00865417297509451	8.0064e-10	0.295688	-0.168565	0.112408
ACSM1.csv	Acute Lymphoblastic Leukemia	rs9921631	16	20433561	G	A	0.0609877298268415	0.143164617848612	0.016776186206451	1.4162e-17	0.0962768	0.206215	0.214324
ACSM1.csv	Acute Lymphoblastic Leukemia	rs9932326	16	21205688	C	T	0.274879190576865	-0.0533062	0.00894534387482531	2.5348e-09	0.265673	0.0909906	0.408255
ACSS1.csv	Acute Lymphoblastic Leukemia	rs113306130	20	25220109	A	G	0.039537983118614	0.140701758374342	0.0210071603174686	2.1187e-11	0.0408387	0.140279	0.565109
ACSS1.csv	Acute Lymphoblastic Leukemia	rs11698369	20	25145269	A	C	0.0178703841020317	0.34382268913203	0.039177161738361	1.6939e-18	0.0349475	-0.333848	0.219822
ACSS1.csv	Acute Lymphoblastic Leukemia	rs117295153	20	25172498	T	C	0.029453995110404	-0.173404	0.0238132947027477	3.294e-13	0.0532879	-0.138589	0.518423
ACSS1.csv	Acute Lymphoblastic Leukemia	rs117356716	20	24834804	T	G	0.0152650947253646	-0.234463	0.0350431507668383	2.2195e-11	0.00618098	0.585849	0.354519
ACSS1.csv	Acute Lymphoblastic Leukemia	rs13045280	20	25104977	T	A	0.182425546370739	-0.0858966	0.0103051658104886	7.7237e-17	0.178884	-0.00301877	0.980962
ACSS1.csv	Acute Lymphoblastic Leukemia	rs142341850	20	25086065	A	G	0.0200107080712087	0.33103645619012	0.0450806809279497	2.0886e-13	0.0240232	-0.42382	0.190797
ACSS1.csv	Acute Lymphoblastic Leukemia	rs2424641	20	24717867	T	G	0.377104250018872	-0.0537607	0.00821138078883862	5.8626e-11	0.341844	0.0740719	0.467988
ACSS1.csv	Acute Lymphoblastic Leukemia	rs3646	20	25038839	G	C	0.234364074275503	-0.294492	0.00950896286899073	1e-200	0.211585	0.111467	0.347064
ACSS1.csv	Acute Lymphoblastic Leukemia	rs4813543	20	25004071	G	T	0.0399450117831893	-0.206235	0.0206636343846575	1.8534e-23	0.036716	0.262656	0.314354
ACSS1.csv	Acute Lymphoblastic Leukemia	rs6037311	20	25978089	A	C	0.158441955582738	-0.13114	0.0109567098282594	5.1647e-33	0.172869	0.0842178	0.510973
ACSS1.csv	Acute Lymphoblastic Leukemia	rs6050129	20	24898485	A	G	0.307673435494829	-0.103119	0.00862291472574479	5.84e-33	0.271031	0.0437614	0.689381
ACSS1.csv	Acute Lymphoblastic Leukemia	rs6115019	20	25043396	A	G	0.0341666330115908	0.140194085282867	0.0225352566721105	4.94e-10	0.0352033	-0.150842	0.571346
ACSS1.csv	Acute Lymphoblastic Leukemia	rs6132825	20	25238309	A	T	0.47012418374665	-0.0658839	0.00797385112087233	1.4253e-16	0.442778	0.0918961	0.350133
ACSS1.csv	Acute Lymphoblastic Leukemia	rs66817095	20	25038484	T	G	0.173260625749314	0.239766183966204	0.0106229894759178	8.4677e-113	0.168346	-0.15795	0.232055
ACSS1.csv	Acute Lymphoblastic Leukemia	rs714689	20	24714340	T	C	0.73276968370197	0.0791561519305237	0.00899348428455646	1.3512e-18	0.252886	-0.131184	0.239613
ACSS1.csv	Acute Lymphoblastic Leukemia	rs7274899	20	24984083	G	T	0.104239015551865	0.151696279515121	0.0130243819933821	2.3768e-31	0.0679473	-0.00268786	0.988984
ACSS1.csv	Acute Lymphoblastic Leukemia	rs73095985	20	25009045	C	T	0.0298056043842415	0.15253134802475	0.0266109576274446	9.937e-09	0.0444647	-0.427355	0.0764645
ACSS1.csv	Acute Lymphoblastic Leukemia	rs74173666	20	25085185	A	C	0.134632215837741	0.0651446106339864	0.0116994020749949	2.5768e-08	0.145861	0.109405	0.430701
ACSS1.csv	Acute Lymphoblastic Leukemia	rs74383965	20	24211580	C	T	0.0505849560301508	-0.107087	0.01846128712154	6.5999e-09	0.0518817	0.297542	0.172906
ACSS1.csv	Acute Lymphoblastic Leukemia	rs74644625	20	25041953	T	C	0.0251160550056933	-0.479935	0.0270495903564629	1.9592e-70	0.00892477	0.981465	0.0616425
ACSS1.csv	Acute Lymphoblastic Leukemia	rs74668297	20	25005769	T	G	0.023710142432979	-0.246312	0.0276202698979259	4.7478e-19	0.021796	0.427613	0.204721
ACSS1.csv	Acute Lymphoblastic Leukemia	rs75468569	20	25257027	A	G	0.0384444981472531	-0.269823	0.0212678380775233	6.9809e-37	0.0481611	0.162374	0.473425
ACSS1.csv	Acute Lymphoblastic Leukemia	rs76370406	20	25025874	C	A	0.0819931832365225	0.179784476726555	0.016013010735037	2.9915e-29	0.0781413	-0.165017	0.370422
ACSS1.csv	Acute Lymphoblastic Leukemia	rs78735597	20	24799364	T	G	0.0241319581135344	-0.232453	0.0263941126139156	1.2831e-18	0.0156353	0.033354	0.932357
ACTBP8.csv	Acute Lymphoblastic Leukemia	rs10944376	6	89122925	T	G	0.137450351359609	-0.556884	0.0279281288127672	1.8306e-88	0.197413	0.213103	0.0789369
ACTBP8.csv	Acute Lymphoblastic Leukemia	rs10944385	6	89188694	A	C	0.0540411377886527	-0.390196	0.0421970252250458	2.3045e-20	0.0315963	-0.442665	0.10996
ACTBP8.csv	Acute Lymphoblastic Leukemia	rs111625475	6	89308788	G	T	0.0207404210425358	0.417979545962545	0.0753238445806609	2.8731e-08	0.0276437	0.193155	0.531019
ACTBP8.csv	Acute Lymphoblastic Leukemia	rs112350747	6	89111634	A	G	0.0274928461369139	1.20051250745472	0.0632737851325137	2.8408e-80	0.00746825	0.255208	0.653803
ACTBP8.csv	Acute Lymphoblastic Leukemia	rs112658003	6	89169754	G	A	0.0159583546680321	1.08288358332721	0.0906459391884693	6.7962e-33	0.022607	-0.142624	0.669937
ACTBP8.csv	Acute Lymphoblastic Leukemia	rs113751782	6	89075280	G	T	0.0190903127050077	-0.555584	0.0784457002574837	1.4147e-12	0.0158622	-0.264162	0.493782
ACTBP8.csv	Acute Lymphoblastic Leukemia	rs117058349	6	89329667	G	T	0.077082803627426	-0.319353	0.0402466796513831	2.105e-15	0.109353	-0.0629238	0.688832
ACTBP8.csv	Acute Lymphoblastic Leukemia	rs117139893	6	88949574	T	G	0.0285237534354142	-0.456467	0.0572775228818365	1.5919e-15	0.0579324	0.120392	0.561782
ACTBP8.csv	Acute Lymphoblastic Leukemia	rs117259490	6	89348320	T	C	0.0185815289438798	0.758422998719988	0.0765983253431355	4.1131e-23	0.0226063	-0.101959	0.753002
ACTBP8.csv	Acute Lymphoblastic Leukemia	rs117304291	6	88728308	C	T	0.0458310207915297	0.356955202081287	0.0513331323009747	3.5608e-12	0.0741629	0.100221	0.593413
ACTBP8.csv	Acute Lymphoblastic Leukemia	rs117313366	6	89843703	A	G	0.0853047964838525	-0.19219	0.0341271312466183	1.7834e-08	0.103456	0.232111	0.148676
ACTBP8.csv	Acute Lymphoblastic Leukemia	rs117473642	6	89100509	A	G	0.0347312207955393	0.757656939925267	0.0520880356342607	6.2282e-48	0.0174497	-0.190456	0.612211
ACTBP8.csv	Acute Lymphoblastic Leukemia	rs11754044	6	89074197	T	C	0.0151625131058956	-0.514293	0.0896730128477586	9.7397e-09	0.0143245	0.427886	0.288737
ACTBP8.csv	Acute Lymphoblastic Leukemia	rs11756658	6	89178813	A	G	0.0739223975239677	-0.520744	0.0364345153392271	2.4335e-46	0.147044	0.0624985	0.651008
ACTBP8.csv	Acute Lymphoblastic Leukemia	rs118129388	6	89056695	C	T	0.0153494282083863	-0.495967	0.0866514004411737	1.0417e-08	0.0087925	-0.468381	0.389979
ACTBP8.csv	Acute Lymphoblastic Leukemia	rs13205355	6	88899965	T	G	0.111762883803771	0.308778856132273	0.0312304777065341	4.7402e-23	0.109405	-0.0691165	0.658734
ACTBP8.csv	Acute Lymphoblastic Leukemia	rs13211942	6	89185457	G	A	0.234115460564526	-0.277169	0.0232378094773849	8.4989e-33	0.26044	0.102433	0.35555
ACTBP8.csv	Acute Lymphoblastic Leukemia	rs1325003	6	89161526	G	A	0.128529367356183	1.03709380948257	0.0284889271189662	1e-200	0.1052	0.0395555	0.804843
ACTBP8.csv	Acute Lymphoblastic Leukemia	rs1359430	6	89164433	C	T	0.190635262144717	-0.562346	0.0242711537891478	9.2683e-119	0.168702	0.0197045	0.879403
ACTBP8.csv	Acute Lymphoblastic Leukemia	rs1408702	6	88973751	G	A	0.579503175617272	0.184644733942652	0.0193114746734424	1.164e-21	0.405793	0.0072828	0.941743
ACTBP8.csv	Acute Lymphoblastic Leukemia	rs140933375	6	89109657	G	A	0.0154363795140494	0.745827384983305	0.0827281523818471	1.9651e-19	0.00272712	0.41449	0.685701
ACTBP8.csv	Acute Lymphoblastic Leukemia	rs149958903	6	89298154	G	A	0.0149580702911524	0.74778129900292	0.0884351737884409	2.7766e-17	0.00669407	0.326949	0.576711
ACTBP8.csv	Acute Lymphoblastic Leukemia	rs17207749	6	88972525	C	T	0.0286953620286954	-0.552614	0.0642993513369317	8.3555e-18	0.0124359	-0.438329	0.330625
ACTBP8.csv	Acute Lymphoblastic Leukemia	rs17276155	6	89161917	T	A	0.825659730526987	-0.621582	0.0251352509863504	5.1398e-135	0.17119	-0.163932	0.20201
ACTBP8.csv	Acute Lymphoblastic Leukemia	rs205226	6	89743077	C	T	0.547397105807179	-0.12384	0.019158994934492	1.0197e-10	0.424083	-0.107945	0.272222
ACTBP8.csv	Acute Lymphoblastic Leukemia	rs2325094	6	88838310	A	G	0.0460985540967259	-0.274301	0.0454599866368069	1.5995e-09	0.0425410000000001	-0.22564	0.354868
ACTBP8.csv	Acute Lymphoblastic Leukemia	rs2325098	6	88901935	T	C	0.594617039749349	-0.16448	0.0194219003816222	2.4793e-17	0.429007	-0.00191446	0.984399
ACTBP8.csv	Acute Lymphoblastic Leukemia	rs2325117	6	89150617	A	G	0.0194330800701344	-0.462607	0.0834820437989286	2.9972e-08	0.0514442	0.0138222	0.950313
ACTBP8.csv	Acute Lymphoblastic Leukemia	rs2325181	6	89920514	C	T	0.209421624262468	0.14966490908573	0.0234283380429119	1.6785e-10	0.212967	-0.265116	0.0248777
ACTBP8.csv	Acute Lymphoblastic Leukemia	rs2757718	6	89254256	G	C	0.584852654512097	-0.5203	0.0193499252678776	2.9376e-159	0.444649	0.0421687	0.666463
ACTBP8.csv	Acute Lymphoblastic Leukemia	rs282115	6	89981712	A	G	0.0715445006416547	0.306235052193466	0.0369875899453422	1.238e-16	0.058451	0.126109	0.544333
ACTBP8.csv	Acute Lymphoblastic Leukemia	rs35412774	6	89785163	T	G	0.0164668081932411	0.574015367336395	0.0749347755066963	1.8593e-14	0.00539528	0.384688	0.574308
ACTBP8.csv	Acute Lymphoblastic Leukemia	rs35482563	6	89142836	C	T	0.0329916198844683	0.736268568018592	0.0533907099257873	2.9195e-43	0.019404	-0.0870991	0.801789
ACTBP8.csv	Acute Lymphoblastic Leukemia	rs62429626	6	89156340	C	T	0.0237126172358875	0.63845719984655	0.0657762530105136	2.8316e-22	0.0146027	-0.154115	0.711065
ACTBP8.csv	Acute Lymphoblastic Leukemia	rs62431499	6	88939623	C	T	0.0684305880576734	0.77159225035483	0.0377565203735971	8.0365e-93	0.0536999	-0.131647	0.542963
ACTBP8.csv	Acute Lymphoblastic Leukemia	rs6938352	6	89051075	C	A	0.576008117554211	-0.121623	0.019289973732849	2.8782e-10	0.44399	0.0409465	0.674615
ACTBP8.csv	Acute Lymphoblastic Leukemia	rs71572799	6	89290810	A	G	0.047207854825984	0.541313060564774	0.050615549956499	1.0788e-26	0.0759334	-0.410073	0.025363
ACTBP8.csv	Acute Lymphoblastic Leukemia	rs7356927	6	89154972	C	A	0.856307088397373	-0.594017	0.0271764213414962	6.5527e-106	0.217371	0.0971565	0.413515
ACTBP8.csv	Acute Lymphoblastic Leukemia	rs747874	6	89283867	T	C	0.559853531222001	-0.271082	0.0192038757439167	3.0269e-45	0.45885	0.102618	0.292607
ACTBP8.csv	Acute Lymphoblastic Leukemia	rs76359248	6	88887417	A	G	0.0149862344813256	1.01766212224767	0.0883532980480868	1.0707e-30	0.00605132	-0.22709	0.727209
ACTBP8.csv	Acute Lymphoblastic Leukemia	rs76464067	6	88896499	T	C	0.0183012802436411	-0.475251	0.0827112686212686	9.1379e-09	0.01009	0.190418	0.702847
ACTBP8.csv	Acute Lymphoblastic Leukemia	rs7742156	6	89248038	G	A	0.131206213828815	0.436036472728247	0.0282762326192396	1.1936e-53	0.101744	0.107494	0.507798
ACTBP8.csv	Acute Lymphoblastic Leukemia	rs7748367	6	88914486	C	T	0.173082804495757	-0.311185	0.0252140831378383	5.3936e-35	0.148226	0.0505626	0.71259
ACTBP8.csv	Acute Lymphoblastic Leukemia	rs7769951	6	89206945	T	C	0.0975609756097561	0.445931535930273	0.0321480142979895	9.4679e-44	0.066507	0.0197187	0.921017
ACTBP8.csv	Acute Lymphoblastic Leukemia	rs79260194	6	88696681	C	A	0.0150547445255474	0.613459575622205	0.112106791839002	4.4498e-08	0.00798163	0.0580499	0.920439
ACTBP8.csv	Acute Lymphoblastic Leukemia	rs79370844	6	89252176	A	G	0.0267073170731707	-0.416005	0.0641785205457939	9.0395e-11	0.0490848	0.136448	0.550708
ACTBP8.csv	Acute Lymphoblastic Leukemia	rs79830501	6	89070411	G	A	0.0162331264163957	1.04624524071199	0.0830168883670291	2.043e-36	0.00433671	0.59585	0.407733
ACTBP8.csv	Acute Lymphoblastic Leukemia	rs806365	6	88845949	T	C	0.584088090495697	-0.137611	0.019341264110019	1.1191e-12	0.366992	-0.136514	0.179229
ACTBP8.csv	Acute Lymphoblastic Leukemia	rs806374	6	88857320	C	T	0.328538812785388	0.168109726613628	0.0202964886587258	1.2051e-16	0.310282	-0.0640673	0.540381
ACTBP8.csv	Acute Lymphoblastic Leukemia	rs806378	6	88859551	T	C	0.284952989988961	-0.186301	0.0211361701286815	1.2033e-18	0.311909	0.0364014	0.727716
ACTBP8.csv	Acute Lymphoblastic Leukemia	rs9344762	6	88924499	A	G	0.12454432710737	-0.309286	0.028869924839211	8.8257e-27	0.12381	0.241472	0.101419
ACTBP8.csv	Acute Lymphoblastic Leukemia	rs9344793	6	89077143	T	C	0.377743535778713	-0.408237	0.0196626242564218	9.5111e-96	0.342619	-0.0390045	0.704061
ACTBP8.csv	Acute Lymphoblastic Leukemia	rs9351150	6	89092535	A	G	0.260287872524334	1.01523551221573	0.0217253295431406	1e-200	0.224786	-0.215957	0.0634176
ACTBP8.csv	Acute Lymphoblastic Leukemia	rs9362466	6	88876581	C	T	0.411428793411545	-0.259024	0.0201627167270261	8.9642e-38	0.4558	0.120988	0.214097
ACTBP8.csv	Acute Lymphoblastic Leukemia	rs9444584	6	88862559	T	C	0.200135328170814	0.199964634898875	0.0238413595434616	4.9786e-17	0.191333	0.0751844	0.542558
ACTBP8.csv	Acute Lymphoblastic Leukemia	rs9444589	6	88887368	T	C	0.115957007027697	0.481073012302238	0.0297741599701832	1.0072e-58	0.130423	-0.122701	0.397474
ACTR1B.csv	Acute Lymphoblastic Leukemia	rs115086514	2	97808825	T	C	0.05174954835029	-0.183549	0.0197549107544256	1.5227e-20	0.0287722	-0.0145866	0.960065
ACTR1B.csv	Acute Lymphoblastic Leukemia	rs116469288	2	98746768	T	C	0.036576008184841	0.287709834845616	0.0222999763479217	4.397e-38	0.0483023	0.170034	0.445748
ACTR1B.csv	Acute Lymphoblastic Leukemia	rs11677797	2	97559759	A	G	0.200242858794958	-0.0916683	0.010033085803487	6.4447e-20	0.165813	-0.110007	0.401436
ACTR1B.csv	Acute Lymphoblastic Leukemia	rs11681534	2	97394755	G	A	0.0426172962639737	0.117179605812853	0.0205078152947816	1.1048e-08	0.0889478	0.117907	0.485039
ACTR1B.csv	Acute Lymphoblastic Leukemia	rs11692435	2	98275354	A	G	0.109512025701137	0.4669369083229	0.0135057084028108	1e-200	0.234446	0.251044	0.0289988
ACTR1B.csv	Acute Lymphoblastic Leukemia	rs11694498	2	97352409	A	T	0.564293181554188	0.0859713506800117	0.00811226498957431	3.0573e-26	0.545418	0.187456	0.054925
ACTR1B.csv	Acute Lymphoblastic Leukemia	rs144265525	2	98315958	A	G	0.032658252147622	-0.158332	0.0247142878238363	1.488e-10	0.0706547	-0.00794489	0.966652
ACTR1B.csv	Acute Lymphoblastic Leukemia	rs1470625	2	98265491	C	A	0.717283327019405	-0.209405	0.00924754682079119	1.5841e-113	0.222986	-0.0604534	0.605685
ACTR1B.csv	Acute Lymphoblastic Leukemia	rs150265353	2	98646667	T	C	0.0239789773349392	0.315989149907019	0.0302538297212932	1.5511e-25	0.0504206	-0.216024	0.339597
ACTR1B.csv	Acute Lymphoblastic Leukemia	rs1730127	2	97622408	G	C	0.745461065187031	-0.0997687	0.00913633203147167	9.2292e-28	0.293474	-0.0940493	0.378018
ACTR1B.csv	Acute Lymphoblastic Leukemia	rs186933208	2	97695134	C	T	0.0237190449046805	0.214863007944975	0.0321699368086502	2.4091e-11	0.0158346	-0.0638968	0.872182
ACTR1B.csv	Acute Lymphoblastic Leukemia	rs59284047	2	97614559	C	T	0.0204687099803637	-0.167873	0.0295801628088088	1.3836e-08	0.0210041	0.633315	0.0572519
ACTR1B.csv	Acute Lymphoblastic Leukemia	rs6744943	2	98634194	C	T	0.0790770417345102	-0.102497	0.0155449596662347	4.2871e-11	0.0772628	0.00748202	0.967195
ACTR1B.csv	Acute Lymphoblastic Leukemia	rs72815665	2	98342701	C	T	0.0261851455271099	-0.199831	0.0276644009602243	5.0629e-13	0.0178447	0.300475	0.410284
ACTR1B.csv	Acute Lymphoblastic Leukemia	rs74735968	2	98809432	C	T	0.0486220163316583	0.103171695212775	0.0188108183150902	4.1441e-08	0.1012	0.219695	0.179507
ACTR1B.csv	Acute Lymphoblastic Leukemia	rs7572249	2	97343012	T	C	0.683065354771618	-0.0670569	0.00876297872006386	1.9726e-14	0.237638	0.0812454	0.480949
ACTR1B.csv	Acute Lymphoblastic Leukemia	rs7605986	2	98777992	A	G	0.16167462136871	-0.0624247	0.0107904055267467	7.2426e-09	0.13395	-0.317368	0.0263475
ACTR1B.csv	Acute Lymphoblastic Leukemia	rs921423	2	98708410	A	T	0.395540703821175	0.0942459734955107	0.00814037222701689	5.3649e-31	0.489926	0.0392184	0.686842
ACTR5.csv	Acute Lymphoblastic Leukemia	rs10485648	20	37243067	G	A	0.115106544901065	0.144591252465375	0.0126644465289238	3.439e-30	0.0751751	-0.234109	0.209296
ACTR5.csv	Acute Lymphoblastic Leukemia	rs111586858	20	37396114	G	A	0.0237758216481621	0.287768361453975	0.028281346946888	2.5587e-24	0.0241504	-0.216744	0.498585
ACTR5.csv	Acute Lymphoblastic Leukemia	rs111966775	20	37366901	T	C	0.0152146304292609	-0.311439	0.0372802126158561	6.5878e-17	0.00251126	-0.893335	0.356867
ACTR5.csv	Acute Lymphoblastic Leukemia	rs113691523	20	37498094	A	G	0.0208303056726251	-0.324213	0.0313334073128762	4.309e-25	0.0120033	0.100459	0.820753
ACTR5.csv	Acute Lymphoblastic Leukemia	rs117258249	20	37269743	A	G	0.054273465292347	-0.233936	0.0192631471126906	6.1582e-34	0.0482412	0.232074	0.300215
ACTR5.csv	Acute Lymphoblastic Leukemia	rs117554107	20	37499442	A	G	0.0282336809739477	-0.163325	0.0253346371236263	1.1424e-10	0.028178	-0.266903	0.361179
ACTR5.csv	Acute Lymphoblastic Leukemia	rs117582119	20	37470527	A	G	0.0112320916905444	-0.361444	0.0571173378870608	2.4804e-10	0.00725042	0.548029	0.327238
ACTR5.csv	Acute Lymphoblastic Leukemia	rs117699981	20	37399655	A	G	0.0213072138148733	0.287371064368513	0.0304450751529308	3.7707e-21	0.0346664	-0.188676	0.480853
ACTR5.csv	Acute Lymphoblastic Leukemia	rs117732470	20	37196517	A	G	0.0205073299291715	0.181887914834032	0.0332324626971483	4.4198e-08	0.0149292	0.0344221	0.932851
ACTR5.csv	Acute Lymphoblastic Leukemia	rs138674781	20	37402491	T	C	0.0156203139058283	0.265896941210362	0.0365569452409929	3.5055e-13	0.0111977	-0.420459	0.347275
ACTR5.csv	Acute Lymphoblastic Leukemia	rs138786193	20	37677325	C	T	0.0322845890855585	-0.175039	0.0241533230582279	4.261e-13	0.0749665	0.154328	0.414825
ACTR5.csv	Acute Lymphoblastic Leukemia	rs139649865	20	37482650	A	G	0.0141087405368204	-0.429683	0.0420709288753339	1.727e-24	0.017458	-0.301501	0.424518
ACTR5.csv	Acute Lymphoblastic Leukemia	rs141897045	20	37455074	A	G	0.0184960582171013	0.259873967312837	0.0397969322071726	6.5858e-11	0.0340298	0.144336	0.597123
ACTR5.csv	Acute Lymphoblastic Leukemia	rs147198022	20	37565394	G	A	0.0135610246107484	-0.402217	0.0670741834672764	2.0124e-09	0.00482037	-0.341962	0.641892
ACTR5.csv	Acute Lymphoblastic Leukemia	rs149509647	20	37420511	C	T	0.0617721637866266	0.246797366995326	0.0183496559027581	3.0954e-41	0.068239	-0.0351779	0.855633
ACTR5.csv	Acute Lymphoblastic Leukemia	rs149868466	20	37525730	A	G	0.0334914442769749	-0.217036	0.0239700129798505	1.3707e-19	0.0299713	-0.390551	0.175453
ACTR5.csv	Acute Lymphoblastic Leukemia	rs150091761	20	37013728	A	C	0.020814629305864	0.187217951959635	0.0310235723332784	1.5936e-09	0.0340151	-0.473162	0.0810438
ACTR5.csv	Acute Lymphoblastic Leukemia	rs16985124	20	37721267	C	G	0.380977475894914	-0.0657401	0.00841461927959879	5.602e-15	0.320473	-0.121028	0.243493
ACTR5.csv	Acute Lymphoblastic Leukemia	rs16987681	20	37560386	T	C	0.972463169489192	-0.224368	0.0263636845165734	1.7304e-17	0.0491872	0.326623	0.146148
ACTR5.csv	Acute Lymphoblastic Leukemia	rs208803	20	37503317	T	A	0.259021697754092	-0.10649	0.0092274533395661	8.2349e-31	0.228554	-0.147132	0.205946
ACTR5.csv	Acute Lymphoblastic Leukemia	rs208809	20	37497947	A	G	0.0290201789057624	-0.36555	0.0250131903012481	2.2735e-48	0.0128441	-0.0551003	0.893524
ACTR5.csv	Acute Lymphoblastic Leukemia	rs2232618	20	37001761	C	T	0.0894600366076876	0.0999007904677487	0.0141747482147264	1.8203e-12	0.068126	-0.165264	0.386545
ACTR5.csv	Acute Lymphoblastic Leukemia	rs34275648	20	37699029	A	G	0.0322624985272749	-0.127281	0.0231861828026937	4.0284e-08	0.0479019	-0.152168	0.498135
ACTR5.csv	Acute Lymphoblastic Leukemia	rs35350081	20	37513398	C	T	0.873806742659202	0.149256044361453	0.0124714688047472	5.2526e-33	0.106729	-0.0976238	0.541289
ACTR5.csv	Acute Lymphoblastic Leukemia	rs35456231	20	37407148	A	G	0.0274869109947644	-0.175853	0.0256670710815361	7.3131e-12	0.024472	-0.257461	0.409343
ACTR5.csv	Acute Lymphoblastic Leukemia	rs56245805	20	37489569	A	G	0.155126951048356	0.23384226620946	0.0117062779067402	8.9798e-89	0.173633	-0.0337522	0.793292
ACTR5.csv	Acute Lymphoblastic Leukemia	rs57326707	20	37375651	T	C	0.0440069484655472	-0.341957	0.019827627457449	1.1868e-66	0.100792	0.0688583	0.669175
ACTR5.csv	Acute Lymphoblastic Leukemia	rs6028266	20	37708520	G	C	0.178663093530611	0.0727385888000908	0.0105145475939361	4.5871e-12	0.18794	-0.0828039	0.502126
ACTR5.csv	Acute Lymphoblastic Leukemia	rs6070846	20	37265447	T	G	0.284597961494904	0.129864746105013	0.00892700730749229	6.0843e-48	0.270642	-0.104256	0.342385
ACTR5.csv	Acute Lymphoblastic Leukemia	rs6071087	20	37311606	T	C	0.0341103455016371	0.164133776610615	0.024742790733631	3.2804e-11	0.0523823	-0.058475	0.787849
ACTR5.csv	Acute Lymphoblastic Leukemia	rs6092935	20	37349905	C	T	0.223176368897741	-0.0755726	0.00965549679753369	4.9965e-15	0.251767	0.175186	0.118442
ACTR5.csv	Acute Lymphoblastic Leukemia	rs6124014	20	37392498	A	C	0.159658790669586	-0.208702	0.0109962457367717	2.515e-80	0.170815	0.205888	0.113928
ACTR5.csv	Acute Lymphoblastic Leukemia	rs6127987	20	37035218	A	G	0.75429472946126	0.0760509736340485	0.00948349277792931	1.0644e-15	0.324361	-0.0368273	0.723907
ACTR5.csv	Acute Lymphoblastic Leukemia	rs62204126	20	37586514	C	T	0.656488406178361	-0.106314	0.00846595024777733	3.6021e-36	0.323513	-0.0760301	0.463674
ACTR5.csv	Acute Lymphoblastic Leukemia	rs721034	20	37338047	C	A	0.0334452479338843	0.141413075921059	0.0236908538843475	2.3871e-09	0.0223043	-0.593551	0.0708223
ACTR5.csv	Acute Lymphoblastic Leukemia	rs73117374	20	37362415	G	A	0.0239866935130876	0.230321544481539	0.0280356827482306	2.1181e-16	0.0230249	0.157624	0.632166
ACTR5.csv	Acute Lymphoblastic Leukemia	rs731671	20	37515333	A	G	0.391033109098425	-0.0533214	0.00823865536340695	9.6586e-11	0.407132	-0.0537041	0.58813
ACTR5.csv	Acute Lymphoblastic Leukemia	rs75602421	20	37464139	G	A	0.0201368523949169	-0.177915	0.0291114367708524	9.8637e-10	0.0285916	0.20472	0.481689
ACTR5.csv	Acute Lymphoblastic Leukemia	rs75610972	20	37399913	A	G	0.0299275241586138	0.18509500407227	0.0246543508008245	6.0221e-14	0.0406443	0.0330472	0.892676
ACTR5.csv	Acute Lymphoblastic Leukemia	rs77180789	20	37518095	A	G	0.0256851278523105	0.163070704690456	0.0255989929186613	1.8878e-10	0.027333	-0.407923	0.167645
ACTR5.csv	Acute Lymphoblastic Leukemia	rs77740998	20	37445345	A	G	0.0175676615876992	0.255202666182671	0.0385957270171307	3.7916e-11	0.0251553	-0.452478	0.146994
ACTR5.csv	Acute Lymphoblastic Leukemia	rs78242838	20	37399679	T	C	0.0140648379052369	-0.364021	0.0501247681183466	3.8028e-13	0.0104391	-0.0726334	0.88127
ACTR5.csv	Acute Lymphoblastic Leukemia	rs79074988	20	37486333	T	C	0.0325274893682234	-0.353665	0.0228512965380241	4.9762e-54	0.0712291	0.18696	0.328036
ACTR5.csv	Acute Lymphoblastic Leukemia	rs997848	20	37361504	C	T	0.366445207806425	-0.342348	0.0083597484523837	1e-200	0.391129	0.0552214	0.578585
ACVR1B.csv	Acute Lymphoblastic Leukemia	rs113598855	12	52289255	C	T	0.029969262295082	0.149848044300917	0.0246590383591556	1.226e-09	0.0210518	0.123236	0.717822
ACVR1B.csv	Acute Lymphoblastic Leukemia	rs11612312	12	52349088	C	T	0.201059791799767	0.185285480364618	0.00994527685057398	1.8216e-77	0.187378	0.286474	0.0220105
ACVR1B.csv	Acute Lymphoblastic Leukemia	rs11833804	12	52268207	A	G	0.0947488584474886	0.139446175039921	0.0136819245525825	2.1573e-24	0.0731579	0.215851	0.254958
ACVR1B.csv	Acute Lymphoblastic Leukemia	rs148558770	12	52443629	G	A	0.0305230841893966	0.133330019406095	0.0236270878428692	1.6711e-08	0.0312338	0.187614	0.514028
ACVR1B.csv	Acute Lymphoblastic Leukemia	rs2701133	12	52407063	A	G	0.659474039109912	-0.0651341	0.0099131079250593	5.0113e-11	0.40328	-0.185328	0.0616325
ACVR1B.csv	Acute Lymphoblastic Leukemia	rs772002	12	52322582	G	A	0.275768330438722	-0.0495798	0.00893667695703742	2.8896e-08	0.308966	-0.0687031	0.514328
ACVR1B.csv	Acute Lymphoblastic Leukemia	rs7978526	12	52292037	G	A	0.173603944501777	0.0646375999494206	0.010598934155845	1.0714e-09	0.17013	0.013118	0.919314
ACYP2.csv	Acute Lymphoblastic Leukemia	rs11125513	2	53854488	A	G	0.178698936450073	0.0874960061875562	0.0105306493419616	9.6838e-17	0.162544	0.0815518	0.537529
ACYP2.csv	Acute Lymphoblastic Leukemia	rs112145784	2	53993246	C	T	0.015919629057187	0.250274863862051	0.0368354621249928	1.0876e-11	0.0196726	-0.0219082	0.950824
ACYP2.csv	Acute Lymphoblastic Leukemia	rs113506637	2	54188026	T	C	0.042854305293475	0.294016316202341	0.0224203751927238	2.7449e-39	0.0430943	0.319021	0.187176
ACYP2.csv	Acute Lymphoblastic Leukemia	rs116401567	2	54589685	A	G	0.0269531	-0.186662	0.0258946385386972	5.653e-13	0.0178982	0.430421	0.241741
ACYP2.csv	Acute Lymphoblastic Leukemia	rs116521094	2	53828849	T	C	0.0319303678678679	-0.166166	0.0252236425237523	4.4639e-11	0.0082667	-0.173548	0.746311
ACYP2.csv	Acute Lymphoblastic Leukemia	rs12471250	2	54644803	C	T	0.309270373306156	-0.167584	0.00874511669149494	7.4822e-82	0.415005	-0.0191349	0.84663
ACYP2.csv	Acute Lymphoblastic Leukemia	rs13026765	2	54571909	C	A	0.353749295245255	0.0932913545039575	0.00843815107806307	2.055e-28	0.293438	-0.107997	0.31286
ACYP2.csv	Acute Lymphoblastic Leukemia	rs13028962	2	54587319	T	C	0.0441082802547771	-0.274071	0.0213190036904134	7.9796e-38	0.0696113	-0.142209	0.466858
ACYP2.csv	Acute Lymphoblastic Leukemia	rs13417064	2	54362726	G	A	0.0619951687174455	0.107883934171911	0.0167610126731365	1.2234e-10	0.0333603	-0.302905	0.264968
ACYP2.csv	Acute Lymphoblastic Leukemia	rs13429859	2	54323982	C	G	0.136347886347886	-0.115788	0.0118798006092486	1.9075e-22	0.104241	-0.127648	0.424193
ACYP2.csv	Acute Lymphoblastic Leukemia	rs138364278	2	53843564	G	A	0.129502868068834	-0.13247	0.0121063387839386	7.2261e-28	0.159689	-0.084949	0.523105
ACYP2.csv	Acute Lymphoblastic Leukemia	rs140071766	2	53971086	C	A	0.0209346165294176	0.279707059855111	0.0317038322306728	1.1203e-18	0.0119317	0.264631	0.564859
ACYP2.csv	Acute Lymphoblastic Leukemia	rs141776959	2	54194417	C	T	0.0193355960094621	0.340689751419221	0.0333052849578388	1.4673e-24	0.0313216	0.288468	0.295181
ACYP2.csv	Acute Lymphoblastic Leukemia	rs143812813	2	54757685	A	G	0.0345713323227219	-0.158416	0.0231886941445794	8.3856e-12	0.0344875	-0.0328614	0.902793
ACYP2.csv	Acute Lymphoblastic Leukemia	rs143821275	2	53558206	C	T	0.0577856609410007	-0.118483	0.0189637259332436	4.1574e-10	0.069465	-0.215989	0.25958
ACYP2.csv	Acute Lymphoblastic Leukemia	rs144262608	2	54683182	A	C	0.0367336909783365	-0.167466	0.0222546636978052	5.264e-14	0.0586701	-0.22866	0.264229
ACYP2.csv	Acute Lymphoblastic Leukemia	rs146160116	2	54317048	T	C	0.0318887601390498	-0.14217	0.0251100085857506	1.4962e-08	0.00392325	1.84311	0.0152518
ACYP2.csv	Acute Lymphoblastic Leukemia	rs148798736	2	53851719	T	C	0.018213598135576	-0.281085	0.0376380442476614	8.1299e-14	0.0188055	0.00362982	0.992006
ACYP2.csv	Acute Lymphoblastic Leukemia	rs149909028	2	54456883	C	T	0.0201658843366905	-0.323998	0.0311640971241325	2.5694e-25	0.0308342	-0.0787548	0.774007
ACYP2.csv	Acute Lymphoblastic Leukemia	rs164941	2	54993592	C	T	0.104020385050963	0.104666854314788	0.0132404212868639	2.6793e-15	0.0911960000000001	0.0949449	0.574532
ACYP2.csv	Acute Lymphoblastic Leukemia	rs17045881	2	54649068	C	G	0.816158985392368	0.143589904231879	0.0104347061385878	4.3986e-43	0.21139	0.0614714	0.606405
ACYP2.csv	Acute Lymphoblastic Leukemia	rs17578112	2	53856094	C	A	0.226303272809633	-0.126003	0.00965989050598242	6.8753e-39	0.255044	-0.134629	0.224913
ACYP2.csv	Acute Lymphoblastic Leukemia	rs17579618	2	53921754	A	G	0.0221910828025478	0.257051605251132	0.0311570150118945	1.5813e-16	0.0230332	0.572924	0.080323
ACYP2.csv	Acute Lymphoblastic Leukemia	rs185693278	2	54400443	A	G	0.0211055933089388	0.253265230096443	0.0353051787242727	7.3158e-13	0.0159911	0.199645	0.611104
ACYP2.csv	Acute Lymphoblastic Leukemia	rs2160929	2	53881872	C	T	0.479728964553999	-0.340955	0.00809077653907045	1e-200	0.60519	-0.0913049	0.360771
ACYP2.csv	Acute Lymphoblastic Leukemia	rs241660	2	54925311	T	C	0.0967833276701778	0.116330406282665	0.0136720972054939	1.7635e-17	0.082952	0.0945903	0.595286
ACYP2.csv	Acute Lymphoblastic Leukemia	rs2949813	2	54024957	G	C	0.0688965230850542	-0.140726	0.0159595104628507	1.1673e-18	0.0592905	-0.213157	0.306683
ACYP2.csv	Acute Lymphoblastic Leukemia	rs3796009	2	55040038	C	T	0.126222020911184	-0.0965683	0.012170844056206	2.1117e-15	0.216982	-0.114421	0.33338
ACYP2.csv	Acute Lymphoblastic Leukemia	rs4671857	2	54339535	C	A	0.101619069035305	0.272463417815786	0.0144178846951881	1.1936e-79	0.13887	0.0854696	0.547215
ACYP2.csv	Acute Lymphoblastic Leukemia	rs4671869	2	54353344	A	G	0.0139136501046431	-0.371586	0.055251134817153	1.7511e-11	0.02319	-0.385319	0.240244
ACYP2.csv	Acute Lymphoblastic Leukemia	rs4671934	2	54687523	G	C	0.439610242465443	-0.0712436	0.00814547224088182	2.1988e-18	0.575196	-0.123288	0.210133
ACYP2.csv	Acute Lymphoblastic Leukemia	rs62139281	2	54153284	G	A	0.0289034822431522	0.275809291981911	0.0255641716933062	3.8883e-27	0.0220481	-0.0837248	0.79692
ACYP2.csv	Acute Lymphoblastic Leukemia	rs72793667	2	53946431	A	G	0.0634749220062395	0.224724650828562	0.0169970389541624	6.6023e-40	0.0396828	-0.0678074	0.78697
ACYP2.csv	Acute Lymphoblastic Leukemia	rs72800761	2	54360649	G	A	0.0957001522070015	-0.247735	0.0137877315422756	3.4825e-72	0.135807	-0.211841	0.134327
ACYP2.csv	Acute Lymphoblastic Leukemia	rs72908759	2	54474998	A	C	0.0927130522321601	0.189623082283302	0.0140904085634364	2.7855e-41	0.064946	-0.0607937	0.760304
ACYP2.csv	Acute Lymphoblastic Leukemia	rs736085	2	53835083	A	G	0.182458113558796	0.0714979504585085	0.0105886809618217	1.4562e-11	0.14149	0.121358	0.38234
ACYP2.csv	Acute Lymphoblastic Leukemia	rs74412974	2	54649932	C	T	0.0318700236711857	-0.263417	0.024342889635338	2.7318e-27	0.0555399	0.146132	0.492369
ACYP2.csv	Acute Lymphoblastic Leukemia	rs74998738	2	54272105	T	C	0.0467008134980416	0.398540978060808	0.0411329202981503	3.358e-22	0.0415612	0.00474512	0.984472
ACYP2.csv	Acute Lymphoblastic Leukemia	rs75225741	2	54210656	G	A	0.0202959028831563	0.338269719484586	0.0371316925888678	8.2534e-20	0.0244077	0.0940841	0.76781
ACYP2.csv	Acute Lymphoblastic Leukemia	rs7574483	2	53853135	G	A	0.143448524118071	0.100246516082168	0.0118224990367327	2.2675e-17	0.13655	0.224552	0.115005
ACYP2.csv	Acute Lymphoblastic Leukemia	rs7575748	2	53841246	G	A	0.569314713770462	-0.0959774	0.0089010529047953	4.1506e-27	0.441601	-0.1502	0.129733
ACYP2.csv	Acute Lymphoblastic Leukemia	rs7587874	2	54616058	G	A	0.250659947204224	-0.0601588	0.00956207439131286	3.1421e-10	0.272493	-0.138449	0.208323
ACYP2.csv	Acute Lymphoblastic Leukemia	rs76205147	2	54292484	A	G	0.0419453674535019	0.273138922679206	0.0213543267566693	1.8456e-37	0.0345971	0.292353	0.258512
ACYP2.csv	Acute Lymphoblastic Leukemia	rs76949049	2	54965697	T	C	0.109135036205936	-0.124857	0.0132606168346617	4.6949e-21	0.119984	-0.104546	0.484562
ACYP2.csv	Acute Lymphoblastic Leukemia	rs77456006	2	54813272	A	G	0.039375657948012	0.136756997969061	0.0214201578775254	1.7207e-10	0.0175724	-0.268474	0.47433
ACYP2.csv	Acute Lymphoblastic Leukemia	rs79616495	2	54255531	G	A	0.0253486197503761	-0.149278	0.0265505890099923	1.8832e-08	0.0297857	-0.125726	0.664271
ACYP2.csv	Acute Lymphoblastic Leukemia	rs80268724	2	54309700	T	A	0.123291550252964	-0.326926	0.0122954443689448	9.0022e-156	0.144751	-0.094564	0.495834
ACYP2.csv	Acute Lymphoblastic Leukemia	rs805339	2	54187846	C	T	0.0152773657668348	0.289229550820016	0.0396123468903672	2.8479e-13	0.00567700000000004	-0.0363141	0.95616
ACYP2.csv	Acute Lymphoblastic Leukemia	rs843682	2	54492671	T	C	0.447412950289539	-0.192674	0.00811556485570579	1.3482e-124	0.460617	0.114033	0.239566
ACYP2.csv	Acute Lymphoblastic Leukemia	rs888519	2	53811058	T	A	0.319505287009063	-0.0503496	0.0086702109598446	6.345e-09	0.377156	-0.113741	0.253624
ACYP2.csv	Acute Lymphoblastic Leukemia	rs9678301	2	54241510	T	G	0.933188564682071	-0.367561	0.0169759426645113	5.8199e-104	0.130883	0.271067	0.061759
ADAM15.csv	Acute Lymphoblastic Leukemia	rs1094559	1	155847610	G	A	0.0653971184331982	-0.130647	0.0165154124586805	2.5574e-15	0.099345	-0.0650995	0.687597
ADAM15.csv	Acute Lymphoblastic Leukemia	rs11264265	1	154787735	C	T	0.693455341157748	0.068943935969181	0.0096644055018617	9.7635e-13	0.369556	-0.0709389	0.479093
ADAM15.csv	Acute Lymphoblastic Leukemia	rs11264272	1	154808959	T	C	0.246639480441021	-0.122358	0.00923401676219207	4.4523e-40	0.256147	-0.12402	0.264328
ADAM15.csv	Acute Lymphoblastic Leukemia	rs11264304	1	155033317	T	C	0.285708823979202	0.35777986810923	0.00885712120207231	1e-200	0.264623	0.03584	0.745399
ADAM15.csv	Acute Lymphoblastic Leukemia	rs113625558	1	155131930	C	T	0.0230855307969252	0.375961665466175	0.0294117569422873	2.051e-37	0.0322936	0.180741	0.51993
ADAM15.csv	Acute Lymphoblastic Leukemia	rs11465212	1	155157445	A	G	0.0192622758975799	-0.634929	0.0316402905643773	1.4283e-89	0.0238922	-0.368027	0.237599
ADAM15.csv	Acute Lymphoblastic Leukemia	rs114889704	1	155534434	G	T	0.0337670076472341	0.244721946044808	0.0246538938018001	3.2023e-23	0.0268264	0.573077	0.0548277
ADAM15.csv	Acute Lymphoblastic Leukemia	rs11582176	1	155841960	T	C	0.030878414568827	0.177073296897576	0.0265266425325567	2.469e-11	0.0165195	0.165643	0.669968
ADAM15.csv	Acute Lymphoblastic Leukemia	rs116086598	1	155142938	A	G	0.0148623723041998	0.367226720353365	0.0422056017599748	3.2955e-18	0.0112779	-0.594641	0.206009
ADAM15.csv	Acute Lymphoblastic Leukemia	rs11804231	1	154729941	C	T	0.495700152207002	0.0693837031107613	0.00798688911395632	3.7214e-18	0.502742	0.192902	0.0480076
ADAM15.csv	Acute Lymphoblastic Leukemia	rs12136348	1	156016035	T	C	0.571829622458858	-0.201105	0.00812950549336252	4.1949e-135	0.456451	-0.20004	0.0411263
ADAM15.csv	Acute Lymphoblastic Leukemia	rs1218550	1	154801247	C	T	0.303168101018452	0.0654483223305173	0.00864289499247504	3.6639e-14	0.275148	0.125073	0.251424
ADAM15.csv	Acute Lymphoblastic Leukemia	rs12752133	1	155205378	T	C	0.0195713449981386	0.298441738551525	0.0372265761767672	1.0854e-15	0.0418224	-0.120804	0.61656
ADAM15.csv	Acute Lymphoblastic Leukemia	rs139589338	1	154826289	G	A	0.0149245450510431	0.26134871538539	0.0383709996014433	9.6923e-12	0.0203648	-0.137383	0.684605
ADAM15.csv	Acute Lymphoblastic Leukemia	rs141206156	1	155988391	T	C	0.0745803540702787	-0.371177	0.0152311024340666	3.576e-131	0.0880401	-0.0810233	0.632175
ADAM15.csv	Acute Lymphoblastic Leukemia	rs142497447	1	155721287	A	C	0.0308412866737363	0.205224763047014	0.0275439903160753	9.2776e-14	0.0541608	0.4265	0.0486575
ADAM15.csv	Acute Lymphoblastic Leukemia	rs144886967	1	155245180	A	G	0.0132266666666667	-0.653862	0.0639242229168281	1.4733e-24	0.0124764	-0.590665	0.206537
ADAM15.csv	Acute Lymphoblastic Leukemia	rs145815601	1	155027082	T	G	0.0395349931755071	0.294112240758531	0.0223662900392805	1.7108e-39	0.0331327	-0.251914	0.348947
ADAM15.csv	Acute Lymphoblastic Leukemia	rs149681784	1	155301642	T	C	0.0297580764854302	-0.361803	0.0261688907904325	1.7812e-43	0.0399054	-0.16076	0.512681
ADAM15.csv	Acute Lymphoblastic Leukemia	rs151131339	1	155894160	C	T	0.0174203821656051	0.204623601877743	0.0374974531569989	4.8479e-08	0.0122026	0.110568	0.79965
ADAM15.csv	Acute Lymphoblastic Leukemia	rs16836748	1	155194679	G	A	0.0145922746781116	-0.338047	0.046173047778028	2.454e-13	0.00582303	-1.02691	0.114977
ADAM15.csv	Acute Lymphoblastic Leukemia	rs183651946	1	155919334	A	G	0.0330135756759789	0.224520904586643	0.026151783232577	9.0679e-18	0.0473779	0.204358	0.388821
ADAM15.csv	Acute Lymphoblastic Leukemia	rs186369638	1	155184627	A	C	0.0157530196807163	-0.71463	0.0436644391009867	3.3121e-60	0.00350378	-1.01426	0.226684
ADAM15.csv	Acute Lymphoblastic Leukemia	rs4845396	1	154828409	A	G	0.485268142357849	0.132885714857828	0.00794847083798854	9.6593e-63	0.556056	-0.0288992	0.767644
ADAM15.csv	Acute Lymphoblastic Leukemia	rs4845672	1	154767341	T	C	0.186250143386992	-0.108146	0.010278249278175	6.8406e-26	0.191256	-0.0463738	0.707641
ADAM15.csv	Acute Lymphoblastic Leukemia	rs4845701	1	154992955	T	C	0.437969569977725	-0.194961	0.00802233624501969	1.8491e-130	0.445196	-0.122091	0.212175
ADAM15.csv	Acute Lymphoblastic Leukemia	rs55861235	1	154907479	A	G	0.0186253369272237	-0.440458	0.0340274656357714	2.5273e-38	0.00680172	0.112786	0.854376
ADAM15.csv	Acute Lymphoblastic Leukemia	rs6675468	1	155040654	T	C	0.0825182219872352	-0.599682	0.0144671883939504	1e-200	0.0382186	-0.0119289	0.962771
ADAM15.csv	Acute Lymphoblastic Leukemia	rs6676150	1	155123837	C	G	0.417746138449337	0.236825887266537	0.00807133514418222	3.0764e-189	0.376121	0.110073	0.272936
ADAM15.csv	Acute Lymphoblastic Leukemia	rs6690891	1	154774966	C	T	0.196531028234939	0.0629067172406927	0.0100153983825335	3.3684e-10	0.193756	-0.0682333	0.579069
ADAM15.csv	Acute Lymphoblastic Leukemia	rs6694256	1	155106768	C	T	0.0395780626902792	0.258626184852172	0.021522767621931	2.9139e-33	0.0216811	-0.206012	0.549108
ADAM15.csv	Acute Lymphoblastic Leukemia	rs72700264	1	154772817	T	A	0.0703042427902763	-0.133995	0.0155670799186816	7.4476e-18	0.0492214	0.028403	0.900902
ADAM15.csv	Acute Lymphoblastic Leukemia	rs72702267	1	155045132	A	G	0.088994826627902	0.098276479955388	0.0147195398788887	2.4488e-11	0.123051	-0.0410828	0.783056
ADAM15.csv	Acute Lymphoblastic Leukemia	rs72706148	1	155741305	T	C	0.0191169127612526	-0.649346	0.0373696508977207	1.2453e-67	0.00411959	-0.420004	0.595856
ADAM15.csv	Acute Lymphoblastic Leukemia	rs75172742	1	155152545	T	G	0.0178061112332381	0.401622747817581	0.0350505086065752	2.1342e-30	0.018265	0.695607	0.0561345
ADAM15.csv	Acute Lymphoblastic Leukemia	rs7528548	1	154934665	T	C	0.032819782496116	0.143873216023003	0.0236144201199821	1.1123e-09	0.0191685	0.421488	0.228095
ADAM15.csv	Acute Lymphoblastic Leukemia	rs76102976	1	154816174	A	G	0.869010485174189	0.069147970155949	0.0117742763513058	4.2901e-09	0.176043	-0.230836	0.0692261
ADAM15.csv	Acute Lymphoblastic Leukemia	rs77268551	1	155044197	G	T	0.0223483326637204	0.293999892477562	0.0302630926501381	2.6127e-22	0.0193692	0.331087	0.348375
ADAM15.csv	Acute Lymphoblastic Leukemia	rs77885114	1	154974619	A	G	0.0853706735926825	0.106232584527605	0.0167638605850726	2.3428e-10	0.11088	0.0178143	0.909164
ADAM15.csv	Acute Lymphoblastic Leukemia	rs78431420	1	154929408	T	G	0.0160818713450292	-0.262416	0.0464412173255143	1.5989e-08	0.0270728	0.0519833	0.863128
ADAM15.csv	Acute Lymphoblastic Leukemia	rs79382812	1	155055863	A	G	0.118228390105899	-0.620396	0.0123921356931276	1e-200	0.154628	-0.0398173	0.766246
ADAM19.csv	Acute Lymphoblastic Leukemia	rs111668949	5	156804227	A	G	0.953271921106949	0.182565980176438	0.0189562740944707	5.9266e-22	0.0445106	0.171163	0.468212
ADAM19.csv	Acute Lymphoblastic Leukemia	rs112724886	5	157000950	T	C	0.0195615925820489	-0.286004	0.0296454388219145	5.032e-22	0.0202864	0.126981	0.708727
ADAM19.csv	Acute Lymphoblastic Leukemia	rs11465278	5	156958588	C	T	0.0424228501416648	-0.234699	0.0198641333050044	3.2577e-32	0.0544686	0.000810215	0.996999
ADAM19.csv	Acute Lymphoblastic Leukemia	rs11466814	5	156907678	C	A	0.0378267729967163	-0.261327	0.0219459056403944	1.0753e-32	0.0470996	0.0601974	0.795111
ADAM19.csv	Acute Lymphoblastic Leukemia	rs116350886	5	156570053	T	G	0.0266675179840804	-0.197256	0.0259670836404792	3.0401e-14	0.0151568	0.0121149	0.975141
ADAM19.csv	Acute Lymphoblastic Leukemia	rs13179122	5	157336884	C	T	0.438665358194308	0.0551979841866457	0.00802004855599647	5.8852e-12	0.469119	-0.15021	0.123449
ADAM19.csv	Acute Lymphoblastic Leukemia	rs13190347	5	157201540	A	G	0.0768878809580648	-0.143574	0.0152707601280947	5.3536e-21	0.0406826	0.495161	0.0467875
ADAM19.csv	Acute Lymphoblastic Leukemia	rs141866682	5	156555686	A	G	0.0265890428813486	0.171235609666681	0.0262237143046772	6.5858e-11	0.0326618	0.10705	0.692111
ADAM19.csv	Acute Lymphoblastic Leukemia	rs142452443	5	157254552	T	C	0.0165309579758457	0.240308123277098	0.0362734717923438	3.4772e-11	0.0202449	-0.282844	0.421723
ADAM19.csv	Acute Lymphoblastic Leukemia	rs17599222	5	156817266	T	G	0.494325228306212	0.119712943523106	0.0079455317702686	2.6858e-51	0.477976	0.185224	0.0580537
ADAM19.csv	Acute Lymphoblastic Leukemia	rs180976719	5	157163459	T	C	0.05185518326962	0.127065228258532	0.0192970413623296	4.5611e-11	0.0127427	0.115853	0.797003
ADAM19.csv	Acute Lymphoblastic Leukemia	rs187458	5	156693562	C	G	0.261407874142152	-0.11704	0.00929224429908498	2.2326e-36	0.210775	0.24732	0.038539
ADAM19.csv	Acute Lymphoblastic Leukemia	rs188199357	5	156581959	T	G	0.0161919178019357	0.321603137228456	0.0341741992868178	4.9331e-21	0.0237064	-0.240969	0.444949
ADAM19.csv	Acute Lymphoblastic Leukemia	rs2277027	5	156932376	C	A	0.334947569113441	0.2024526071002	0.00846830469191996	2.5901e-126	0.376325	0.0334749	0.738702
ADAM19.csv	Acute Lymphoblastic Leukemia	rs2434974	5	156613720	C	A	0.123286114688281	0.0790502394371364	0.012122782394359	6.9933e-11	0.106335	0.234203	0.132948
ADAM19.csv	Acute Lymphoblastic Leukemia	rs30118	5	156666799	T	G	0.570411154539988	-0.0781566	0.00802511658987015	2.0557e-22	0.448131	-0.0210157	0.830391
ADAM19.csv	Acute Lymphoblastic Leukemia	rs31225	5	156624087	T	A	0.504510795711913	0.070424986223588	0.00796005405305438	8.9742e-19	0.522899	-0.153031	0.117322
ADAM19.csv	Acute Lymphoblastic Leukemia	rs34147166	5	157456823	A	T	0.192673536405843	0.0592279834752818	0.0100908056010362	4.3738e-09	0.191624	-0.0206482	0.867099
ADAM19.csv	Acute Lymphoblastic Leukemia	rs35483114	5	157162283	G	A	0.190030441400304	0.0674908723580817	0.010178544099127	3.3433e-11	0.188702	-0.0670453	0.586934
ADAM19.csv	Acute Lymphoblastic Leukemia	rs62390774	5	157046753	T	C	0.246941780563316	0.105883826378493	0.00922992262578614	1.8324e-30	0.25929	-0.199393	0.073675
ADAM19.csv	Acute Lymphoblastic Leukemia	rs6895925	5	156666163	T	C	0.617591792250742	0.0810637281851711	0.00817430126200437	3.5186e-23	0.439628	0.189385	0.0524336
ADAM19.csv	Acute Lymphoblastic Leukemia	rs72811316	5	156953418	T	A	0.0500690342870292	-0.224798	0.0183709797235824	1.9816e-34	0.0193567	0.796394	0.0210189
ADAM19.csv	Acute Lymphoblastic Leukemia	rs72813222	5	157108887	A	G	0.0317084440337299	-0.186551	0.0229029612168502	3.7803e-16	0.0555484	0.281701	0.189932
ADAM19.csv	Acute Lymphoblastic Leukemia	rs76834936	5	157357864	A	G	0.0236243093922652	-0.16371	0.0279741614992846	4.8453e-09	0.0129943	0.208746	0.640721
ADAM19.csv	Acute Lymphoblastic Leukemia	rs7709588	5	156744041	G	C	0.268590517892194	-0.0982507	0.00897930483648218	7.2581e-28	0.307447	0.034849	0.741112
ADAM19.csv	Acute Lymphoblastic Leukemia	rs7720464	5	156335531	G	A	0.193314731289657	0.0609185821003282	0.0101313146901376	1.8235e-09	0.183245	-0.102131	0.418193
ADAM19.csv	Acute Lymphoblastic Leukemia	rs7724199	5	156989957	A	G	0.151527678604983	-0.319335	0.0110789901223597	1.0858e-182	0.126871	0.308966	0.0335467
ADAM19.csv	Acute Lymphoblastic Leukemia	rs80320835	5	156816895	C	G	0.067093194428717	0.599437575378659	0.0159075428812943	1e-200	0.0912522	-0.159798	0.337978
ADAM28.csv	Acute Lymphoblastic Leukemia	rs112837239	8	24371386	T	C	0.933991228070175	-0.110048	0.0163995945330828	1.9409e-11	0.0679855	0.14057	0.473571
ADAM28.csv	Acute Lymphoblastic Leukemia	rs117233316	8	24294766	G	T	0.0300650935720098	0.131367674668305	0.0240454806926775	4.6763e-08	0.0300094	-0.000439529	0.998782
ADAM28.csv	Acute Lymphoblastic Leukemia	rs11989672	8	24207939	G	A	0.406664539362721	0.0845343353268188	0.0087586732970853	4.8489e-22	0.391616	-0.00437002	0.965504
ADAM28.csv	Acute Lymphoblastic Leukemia	rs13253754	8	24390118	C	T	0.398744292237443	0.056620101322373	0.00815557815230436	3.8549e-12	0.422408	0.117988	0.232703
ADAM28.csv	Acute Lymphoblastic Leukemia	rs13265932	8	24291484	G	A	0.50717170573359	0.0791043149049914	0.00796042294660381	2.8677e-23	0.478372	-0.0803538	0.410057
ADAM28.csv	Acute Lymphoblastic Leukemia	rs144492367	8	24137706	C	T	0.0184206768527774	0.28048032762712	0.0325598513665789	7.0432e-18	0.00922219	0.0701052	0.893228
ADAM28.csv	Acute Lymphoblastic Leukemia	rs17051774	8	24109956	G	A	0.0292089638000383	-0.291065	0.0237807743871262	1.9097e-34	0.0198464	0.0352581	0.918341
ADAM28.csv	Acute Lymphoblastic Leukemia	rs17051819	8	24133535	A	G	0.188601600962081	-0.177556	0.0101548903682672	1.8707e-68	0.239477	0.0401687	0.724775
ADAM28.csv	Acute Lymphoblastic Leukemia	rs17736657	8	24177942	C	A	0.0617223243682388	0.111055742525618	0.0174166837911075	1.813e-10	0.106097	-0.0634454	0.691103
ADAM28.csv	Acute Lymphoblastic Leukemia	rs2291576	8	24256052	T	C	0.0416813225466057	-0.221065	0.0202050086596296	7.3224e-28	0.0757827	0.297942	0.108219
ADAM28.csv	Acute Lymphoblastic Leukemia	rs397667	8	24141928	C	T	0.151263717355562	0.0716378047003571	0.0111675819511687	1.4101e-10	0.174121	-0.178507	0.168318
ADAM28.csv	Acute Lymphoblastic Leukemia	rs4448280	8	24431082	C	A	0.803778682598272	0.0993860733629784	0.0100553499492081	4.8941e-23	0.180328	-0.0631338	0.619408
ADAM28.csv	Acute Lymphoblastic Leukemia	rs62499965	8	24213922	G	A	0.088969604282164	0.131362090277966	0.0140543817901469	9.051e-21	0.0907689	-0.0604342	0.724992
ADAM28.csv	Acute Lymphoblastic Leukemia	rs6991250	8	24432087	G	A	0.336183246270059	-0.0889681	0.00840916476709259	3.6896e-26	0.317439	0.0402812	0.698112
ADAM28.csv	Acute Lymphoblastic Leukemia	rs77570572	8	24157662	A	G	0.0369216520018524	-0.12234	0.0220854561527819	3.0316e-08	0.0342471	0.151188	0.57037
ADAM28.csv	Acute Lymphoblastic Leukemia	rs892587	8	24214935	A	C	0.378908019936565	-0.196385	0.00820499887725808	1.3305e-126	0.404932	0.127892	0.197878
ADAMTS13.csv	Acute Lymphoblastic Leukemia	rs116856166	9	136388479	A	G	0.0186508968027034	-0.541402	0.059586419069886	1.0275e-19	0.00909898	1.19739	0.0215278
ADAMTS13.csv	Acute Lymphoblastic Leukemia	rs137855938	9	136312396	G	A	0.0233443288505455	-0.540429	0.0527479216644174	1.2385e-24	0.0202407	0.0908027	0.78685
ADAMTS13.csv	Acute Lymphoblastic Leukemia	rs28650090	9	136352390	G	T	0.592811571884281	0.0591227636051447	0.0107369043140188	3.6625e-08	0.498846	0.00930131	0.924355
ADAMTS13.csv	Acute Lymphoblastic Leukemia	rs28680325	9	136316367	A	C	0.343900259563423	0.128753250926924	0.00975499488032337	8.9381e-40	0.365968	-0.114527	0.256582
ADAMTS13.csv	Acute Lymphoblastic Leukemia	rs3118665	9	136283389	T	C	0.0972745402171505	-0.272661	0.0159609627472727	1.9864e-65	0.063129	0.0855492	0.664309
ADAMTS13.csv	Acute Lymphoblastic Leukemia	rs491105	9	136186926	C	T	0.323090861047148	0.0546335774887901	0.00932759296059382	4.713e-09	0.385507	-0.239663	0.0170345
ADAMTS13.csv	Acute Lymphoblastic Leukemia	rs8176635	9	136152009	A	G	0.3541846743583	0.0671455612857051	0.00910028749941791	1.6044e-13	0.437146	-0.110812	0.255787
ADAMTSL4.csv	Acute Lymphoblastic Leukemia	rs12141871	1	150992160	A	G	0.494997734823316	0.0534660240315869	0.00868984738920912	7.6223e-10	0.555254	-0.125795	0.199262
ADAMTSL4.csv	Acute Lymphoblastic Leukemia	rs142668571	1	150589566	T	C	0.0304766377083822	0.182184300987125	0.0281892495608976	1.0278e-10	0.0287471	-0.051438	0.861004
ADAMTSL4.csv	Acute Lymphoblastic Leukemia	rs3121000	1	150166486	G	A	0.587504301609758	-0.0669363	0.00888196398581267	4.8312e-14	0.398786	0.202255	0.0412715
ADAMTSL4.csv	Acute Lymphoblastic Leukemia	rs509345	1	150276022	G	A	0.507196813108347	0.0611003674662048	0.00867053136360738	1.8308e-12	0.440695	-0.0637619	0.513481
ADAMTSL4.csv	Acute Lymphoblastic Leukemia	rs67807996	1	149995265	A	G	0.354929105192566	-0.0620006	0.0102279083407189	1.3444e-09	0.313879	0.100143	0.343731
ADAMTSL4.csv	Acute Lymphoblastic Leukemia	rs72692854	1	149998923	T	G	0.136763825968031	-0.0962257	0.013453807127736	8.5274e-13	0.104965	0.0154114	0.924359
ADAMTSL4.csv	Acute Lymphoblastic Leukemia	rs72700822	1	150524878	A	G	0.0357125409155308	-0.907552	0.0266331818459994	1e-200	0.0478411	0.46518	0.0147272
ADAMTSL4.csv	Acute Lymphoblastic Leukemia	rs72706550	1	151008354	T	C	0.0193503399384043	-0.265898	0.0391296482913567	1.0801e-11	0.00486747	1.07765	0.0124208
ADAMTSL4.csv	Acute Lymphoblastic Leukemia	rs771204	1	150974162	G	A	0.150362659250629	-0.129016	0.0121278531867863	1.9792e-26	0.179734	0.073962	0.559928
ADAR.csv	Acute Lymphoblastic Leukemia	rs10737169	1	154653704	T	C	0.0838093806374023	-0.0800158	0.0143361526772064	2.3832e-08	0.0595909999999999	0.326019	0.108334
ADAR.csv	Acute Lymphoblastic Leukemia	rs115697580	1	154517689	A	G	0.0230759029220636	-0.171601	0.0282987149248999	1.3278e-09	0.030055	0.489727	0.0800756
ADAR.csv	Acute Lymphoblastic Leukemia	rs12748485	1	154560471	T	C	0.0349303549096554	0.152040461992339	0.0229080099430977	3.2013e-11	0.0469914	-0.11626	0.610329
ADAR.csv	Acute Lymphoblastic Leukemia	rs144412359	1	154559876	C	T	0.0528357731381489	0.148335844230322	0.0182259874710115	3.9987e-16	0.0588873	-0.284912	0.172706
ADAR.csv	Acute Lymphoblastic Leukemia	rs151017214	1	154431128	A	G	0.0744182288299935	-0.120556	0.0156003073206951	1.0925e-14	0.0824225	-0.0151144	0.932056
ADAR.csv	Acute Lymphoblastic Leukemia	rs55997241	1	154671128	A	G	0.0741722634617651	0.12193789906331	0.0154416273966733	2.8661e-15	0.0541731	-0.116892	0.589522
ADAR.csv	Acute Lymphoblastic Leukemia	rs7554577	1	154692883	A	C	0.40499014513528	0.0800262195935478	0.00870228573222573	3.7152e-20	0.374669	-0.00964549	0.923631
ADAR.csv	Acute Lymphoblastic Leukemia	rs77801962	1	154566932	C	T	0.0238373110812861	-0.176761	0.0311029395091877	1.322e-08	0.0336437	0.113412	0.673415
ADARB2.csv	Acute Lymphoblastic Leukemia	rs1044261	10	1065710	T	C	0.0746984538168866	0.334468887941755	0.0155853985919067	3.6672e-102	0.0495027	0.452869	0.0432603
ADARB2.csv	Acute Lymphoblastic Leukemia	rs111387008	10	1306446	A	C	0.0123726959010184	0.526724601644448	0.0586853623954863	2.8232e-19	0.00217115	1.30185	0.22538
ADARB2.csv	Acute Lymphoblastic Leukemia	rs111868093	10	1262585	T	C	0.0189881246907472	-0.280127	0.0451643109618449	5.5609e-10	0.00591288	-0.524012	0.41545
ADARB2.csv	Acute Lymphoblastic Leukemia	rs11250355	10	1286153	G	A	0.077377990430622	-0.155525	0.0149825962569523	3.045e-25	0.0891934	-0.238142	0.160077
ADARB2.csv	Acute Lymphoblastic Leukemia	rs11250370	10	1306900	C	A	0.169059340824533	-0.26332	0.010598890591815	2.9874e-136	0.161463	0.244224	0.0647963
ADARB2.csv	Acute Lymphoblastic Leukemia	rs11250389	10	1339022	T	C	0.0991858311467819	-0.0835623	0.0134376951508678	5.0161e-10	0.129483	0.122443	0.397349
ADARB2.csv	Acute Lymphoblastic Leukemia	rs11250392	10	1342543	T	C	0.386893973719982	0.0666564457247161	0.00817258809047413	3.463e-16	0.381346	0.0981288	0.326256
ADARB2.csv	Acute Lymphoblastic Leukemia	rs11250446	10	1396489	C	T	0.0525069854082583	0.274942206649839	0.0180513690179855	2.202e-52	0.0733451	0.0627808	0.73928
ADARB2.csv	Acute Lymphoblastic Leukemia	rs11250460	10	1404314	T	C	0.202815829528158	0.0959631141331833	0.00993119117990472	4.3469e-22	0.223157	0.0105737	0.928099
ADARB2.csv	Acute Lymphoblastic Leukemia	rs11250484	10	1417599	G	T	0.642805904783479	-0.0721191	0.00830635867191269	3.8682e-18	0.348042	0.119726	0.240575
ADARB2.csv	Acute Lymphoblastic Leukemia	rs11253522	10	984395	A	G	0.448222850817858	0.0968317142636181	0.00828286950743487	1.4271e-31	0.348281	-0.0877997	0.392452
ADARB2.csv	Acute Lymphoblastic Leukemia	rs11253548	10	1027637	A	G	0.0854975086818662	-0.0995818	0.0142330891822427	2.6225e-12	0.018422	-0.590496	0.0917804
ADARB2.csv	Acute Lymphoblastic Leukemia	rs11595854	10	1247272	C	T	0.370851425335095	0.399005659616814	0.00824024112414323	1e-200	0.340322	0.127197	0.218531
ADARB2.csv	Acute Lymphoblastic Leukemia	rs11599423	10	1283471	T	C	0.0349289057670229	0.807906294198524	0.0231317458247373	1e-200	0.0378888	0.449894	0.0809096
ADARB2.csv	Acute Lymphoblastic Leukemia	rs116847603	10	1363989	A	G	0.0192349022136256	0.196029904590672	0.0334504896661728	4.6231e-09	0.0460704	-0.317823	0.174072
ADARB2.csv	Acute Lymphoblastic Leukemia	rs116910792	10	920771	T	C	0.0286519079265877	0.277880287929514	0.025423165900854	8.2848e-28	0.0802565	0.104887	0.566877
ADARB2.csv	Acute Lymphoblastic Leukemia	rs117191991	10	667259	C	A	0.0157943278764123	0.346772788350179	0.0608950213096932	1.2366e-08	0.0205355	-0.0641055	0.853971
ADARB2.csv	Acute Lymphoblastic Leukemia	rs117295556	10	1002583	A	G	0.0548125101018264	-0.134222	0.01798914449069	8.5608e-14	0.0458549	-0.088525	0.701208
ADARB2.csv	Acute Lymphoblastic Leukemia	rs117298300	10	1256882	T	C	0.038677238445175	-0.269052	0.0208512790552226	4.2955e-38	0.0127992	-0.293705	0.501929
ADARB2.csv	Acute Lymphoblastic Leukemia	rs117389379	10	1299484	T	C	0.01219804831227	0.521218390352502	0.0576122903009287	1.4695e-19	0.00701043	-0.346721	0.562035
ADARB2.csv	Acute Lymphoblastic Leukemia	rs117573051	10	834447	T	C	0.0412165530995513	-0.170364	0.0208363563188311	2.9245e-16	0.0291419	-0.206526	0.477707
ADARB2.csv	Acute Lymphoblastic Leukemia	rs117812543	10	1283195	A	G	0.0625290130907065	0.486676798217425	0.0179013483928636	9.3549e-163	0.0480101	0.123069	0.593756
ADARB2.csv	Acute Lymphoblastic Leukemia	rs117838935	10	1293545	G	A	0.0185427273978258	-0.323219	0.0374312881731202	5.8727e-18	0.0402065	-0.20632	0.406247
ADARB2.csv	Acute Lymphoblastic Leukemia	rs117867913	10	1389033	C	T	0.0125572269457162	0.304744176756016	0.0444979450618407	7.4681e-12	0.0113912	-0.363966	0.438622
ADARB2.csv	Acute Lymphoblastic Leukemia	rs117870856	10	752538	C	T	0.116280638632786	0.0832696004425949	0.013347909791388	4.4263e-10	0.143643	-0.161819	0.250911
ADARB2.csv	Acute Lymphoblastic Leukemia	rs118111195	10	1276216	T	C	0.0341880341880342	0.302286325054619	0.05172415814904	5.0901e-09	0.0321479	-0.0405927	0.885205
ADARB2.csv	Acute Lymphoblastic Leukemia	rs12766316	10	1415366	A	C	0.13976474125296	0.107446172786451	0.011456647948654	6.6981e-21	0.150602	-0.101244	0.458004
ADARB2.csv	Acute Lymphoblastic Leukemia	rs12772869	10	837079	T	C	0.416533485540335	-0.0495995	0.00810025462957113	9.1599e-10	0.455347	0.113324	0.24648
ADARB2.csv	Acute Lymphoblastic Leukemia	rs138047087	10	1289419	C	T	0.0156942159220352	0.710159692406599	0.0640042983557838	1.3207e-28	0.0114153	-0.0781425	0.868177
ADARB2.csv	Acute Lymphoblastic Leukemia	rs1392827	10	1244414	G	A	0.742643466496298	-0.216229	0.00908672151988591	3.6565e-125	0.289518	-0.12807	0.235243
ADARB2.csv	Acute Lymphoblastic Leukemia	rs141321306	10	1165166	T	C	0.0153385049365303	0.420749800500627	0.0387117069502269	1.6268e-27	0.017798	-0.783132	0.0314594
ADARB2.csv	Acute Lymphoblastic Leukemia	rs143076471	10	1249955	T	C	0.0244845360824742	-0.224068	0.029016512828054	1.1434e-14	0.01656	-0.287629	0.459235
ADARB2.csv	Acute Lymphoblastic Leukemia	rs143783832	10	1256697	T	G	0.0347363386344613	0.397849125887697	0.0222344063111369	1.3276e-71	0.0267538	-0.0918602	0.764598
ADARB2.csv	Acute Lymphoblastic Leukemia	rs144057221	10	1276077	G	A	0.0342308794041822	-0.217604	0.0226381011057357	7.0877e-22	0.0380237	0.0756137	0.770442
ADARB2.csv	Acute Lymphoblastic Leukemia	rs145358842	10	1263827	C	T	0.0229434988026665	0.338183519904627	0.0329642483165801	1.0782e-24	0.00539962	0.357284	0.605939
ADARB2.csv	Acute Lymphoblastic Leukemia	rs147400996	10	1168038	A	G	0.0188012708046849	-0.252965	0.032185543037998	3.8536e-15	0.0175118	-0.401998	0.293253
ADARB2.csv	Acute Lymphoblastic Leukemia	rs147681976	10	1023526	T	C	0.0148105125598955	0.399789962481977	0.0705383069820168	1.4481e-08	0.00523291	0.0639126	0.925577
ADARB2.csv	Acute Lymphoblastic Leukemia	rs149753891	10	1454818	A	G	0.0225701422943967	-0.153361	0.0275077386632562	2.4725e-08	0.025587	-0.276703	0.37001
ADARB2.csv	Acute Lymphoblastic Leukemia	rs1542874	10	1337709	C	T	0.328009320154835	0.0686030319697136	0.00846136214135938	5.1629e-16	0.27901	0.0235141	0.829947
ADARB2.csv	Acute Lymphoblastic Leukemia	rs17221435	10	936103	A	G	0.120598293810365	-0.116517	0.01219834089881	1.2722e-21	0.101168	-0.0860063	0.596781
ADARB2.csv	Acute Lymphoblastic Leukemia	rs2387638	10	1331955	G	A	0.0853609174724533	-0.181676	0.0153133333821181	1.8206e-32	0.146758	-0.0309275	0.827062
ADARB2.csv	Acute Lymphoblastic Leukemia	rs3812656	10	1067284	G	A	0.401123679957909	0.130482053789785	0.00810507949597394	2.601e-58	0.398979	-0.00887652	0.929185
ADARB2.csv	Acute Lymphoblastic Leukemia	rs41305671	10	856946	T	C	0.0233869674453413	0.187681954349563	0.0303397921677276	6.171e-10	0.00913923	-1.02933	0.0503895
ADARB2.csv	Acute Lymphoblastic Leukemia	rs4880811	10	1332768	G	A	0.697566564818856	0.103118893149002	0.010063325182883	1.2233e-24	0.325196	0.135619	0.191232
ADARB2.csv	Acute Lymphoblastic Leukemia	rs4988559	10	1512183	T	C	0.110280909612077	0.0727163698994603	0.0127718222357882	1.2453e-08	0.127562	0.0503166	0.728935
ADARB2.csv	Acute Lymphoblastic Leukemia	rs58238665	10	1219851	T	G	0.0684115523465704	-0.175746	0.0161700520113268	1.6232e-27	0.080338	0.196815	0.266945
ADARB2.csv	Acute Lymphoblastic Leukemia	rs61831428	10	824880	A	C	0.146064234285252	-0.07441	0.0115988300938926	1.4045e-10	0.189599	-0.203703	0.100493
ADARB2.csv	Acute Lymphoblastic Leukemia	rs61833306	10	1057519	G	A	0.0238907849829352	0.248804792519894	0.0274210384658504	1.1536e-19	0.0159259	0.544631	0.173336
ADARB2.csv	Acute Lymphoblastic Leukemia	rs6560722	10	1332488	G	A	0.173005374121538	-0.106598	0.0105022864427115	3.3136e-24	0.197131	0.0778311	0.528139
ADARB2.csv	Acute Lymphoblastic Leukemia	rs7088740	10	1157410	G	A	0.282385658987561	-0.155168	0.00882466294529	3.2901e-69	0.271534	-0.0739756	0.497686
ADARB2.csv	Acute Lymphoblastic Leukemia	rs7100066	10	1293100	G	A	0.283062121838476	-0.21606	0.00881826930606553	1.4273e-132	0.318491	-0.259285	0.0127679
ADARB2.csv	Acute Lymphoblastic Leukemia	rs71491348	10	1247490	G	A	0.0209543113838063	-0.291587	0.0323220400698277	1.857e-19	0.0307191	-0.440143	0.11288
ADARB2.csv	Acute Lymphoblastic Leukemia	rs72760946	10	1144942	A	G	0.0635831213095867	-0.132673	0.0180044261234132	1.7191e-13	0.110933	-0.0834612	0.595248
ADARB2.csv	Acute Lymphoblastic Leukemia	rs72762906	10	1262718	A	G	0.0231195604609326	-0.193094	0.0293831641154964	4.9777e-11	0.0161252	0.159035	0.682644
ADARB2.csv	Acute Lymphoblastic Leukemia	rs72762943	10	1384429	C	A	0.146513338754017	-0.0704027	0.0113750877717949	6.047e-10	0.171178	-0.0967499	0.456767
ADARB2.csv	Acute Lymphoblastic Leukemia	rs74722649	10	601860	T	C	0.020997375328084	0.276256219352117	0.0383886468535382	6.1914e-13	0.0110315	0.81508	0.090711
ADARB2.csv	Acute Lymphoblastic Leukemia	rs76312690	10	1177236	T	C	0.041248097412481	-0.124431	0.0200805923409843	5.7696e-10	0.035887	0.245127	0.348564
ADARB2.csv	Acute Lymphoblastic Leukemia	rs7894626	10	1172839	C	A	0.534817200227316	-0.159737	0.00799138627712157	6.8934e-89	0.523478	-0.276548	0.00294469
ADARB2.csv	Acute Lymphoblastic Leukemia	rs7899518	10	1168267	C	A	0.363843060618588	0.137552004775308	0.00825706716462315	2.6209e-62	0.364647	0.206416	0.0433002
ADARB2.csv	Acute Lymphoblastic Leukemia	rs7915228	10	768126	C	T	0.377775260534662	0.0544425196151876	0.00820980782567597	3.3252e-11	0.310687	0.0563718	0.592905
ADARB2.csv	Acute Lymphoblastic Leukemia	rs79551031	10	1514567	T	C	0.0194612628197207	-0.213561	0.035105508793891	1.1751e-09	0.00530438	-1.04845	0.115144
ADARB2.csv	Acute Lymphoblastic Leukemia	rs80101160	10	1441443	A	G	0.0243598589389758	0.1649169676423	0.0259826329156636	2.1927e-10	0.0283866	0.0666179	0.818399
ADARB2.csv	Acute Lymphoblastic Leukemia	rs904962	10	1372501	C	T	0.0708621467227901	-0.134126	0.0154819130567967	4.579e-18	0.109778	-0.0336636	0.828348
ADIPOR1.csv	Acute Lymphoblastic Leukemia	rs10753929	1	202923178	T	C	0.140741854259837	-0.0650728	0.011430516398179	1.2483e-08	0.208887	-0.0984469	0.412282
ADIPOR1.csv	Acute Lymphoblastic Leukemia	rs10800887	1	202924936	C	T	0.633332075186835	0.136258661437446	0.00826376011677365	4.431e-61	0.335003	0.248377	0.00925977
ADIPOR1.csv	Acute Lymphoblastic Leukemia	rs10920549	1	203003214	G	T	0.0734699953217369	0.0994915467787787	0.0160402970977943	5.5609e-10	0.0670326	0.265612	0.172793
ADIPOR1.csv	Acute Lymphoblastic Leukemia	rs35554023	1	202972706	A	G	0.136465714175088	-0.0901318	0.0117252307898945	1.5063e-14	0.164976	-0.100927	0.441777
ADIPOR1.csv	Acute Lymphoblastic Leukemia	rs78653387	1	202918641	A	G	0.0266682423382967	0.137800221835148	0.0251634750073313	4.3505e-08	0.048551	0.502287	0.0256401
ADK.csv	Acute Lymphoblastic Leukemia	rs10824305	10	77140469	C	G	0.428256778718672	0.0959461053913447	0.00939643962739276	1.774e-24	0.387863	0.128316	0.197481
ADK.csv	Acute Lymphoblastic Leukemia	rs11000852	10	75783340	C	T	0.439663271825322	-0.373963	0.00877543903046956	1e-200	0.359526	-0.232452	0.0218519
ADK.csv	Acute Lymphoblastic Leukemia	rs11000867	10	75840572	A	C	0.0278097650852142	1.32588107783148	0.0461477793420213	1.5648e-181	0.0599964	0.264613	0.198386
ADK.csv	Acute Lymphoblastic Leukemia	rs11001078	10	76360022	C	T	0.9434428674935	-0.295234	0.0200934862492186	7.1478e-49	0.055589	-0.254045	0.234297
ADK.csv	Acute Lymphoblastic Leukemia	rs113406502	10	75959526	T	C	0.0243830090175605	-0.320942	0.0353121705704409	1.0014e-19	0.025649	-0.378737	0.222734
ADK.csv	Acute Lymphoblastic Leukemia	rs113425666	10	75709378	C	T	0.016502369152007	-0.255027	0.0409616109984585	4.7849e-10	0.0355133	-0.381191	0.147668
ADK.csv	Acute Lymphoblastic Leukemia	rs117118249	10	76423929	G	A	0.0122367101303912	-0.621451	0.0914625019317539	1.0846e-11	0.000681642	-1.00656	0.621591
ADK.csv	Acute Lymphoblastic Leukemia	rs117293767	10	77185775	T	C	0.0160832089372562	0.324929897163757	0.0392086467279367	1.1614e-16	0.00840271	0.196262	0.720424
ADK.csv	Acute Lymphoblastic Leukemia	rs11817469	10	76885140	G	A	0.0664493578918431	-0.17088	0.017881043417591	1.2169e-21	0.065157	0.196179	0.320499
ADK.csv	Acute Lymphoblastic Leukemia	rs12244667	10	76553723	A	G	0.0263463641334062	0.249731872208984	0.0367679910791925	1.1059e-11	0.00996387	0.273152	0.583715
ADK.csv	Acute Lymphoblastic Leukemia	rs12249583	10	75700637	T	C	0.0161178107606679	0.646743646965087	0.0430737437038847	5.8916e-51	0.00991726	0.407462	0.430582
ADK.csv	Acute Lymphoblastic Leukemia	rs12359810	10	77169344	C	A	0.0757110609480813	-0.0994525	0.0180642138531941	3.6791e-08	0.0931675	-0.139042	0.409784
ADK.csv	Acute Lymphoblastic Leukemia	rs1259593	10	77109164	A	G	0.605406025386145	-0.170846	0.00898917340964888	1.5212e-80	0.386878	-0.0679978	0.494637
ADK.csv	Acute Lymphoblastic Leukemia	rs12769899	10	77171876	A	G	0.036485746768285	0.171234340473381	0.0246040491512991	3.4124e-12	0.0480389	-0.000924704	0.996729
ADK.csv	Acute Lymphoblastic Leukemia	rs12781687	10	75711076	A	G	0.0239745121465552	0.246615188677557	0.0412544854677323	2.2617e-09	0.0234315	-0.191265	0.564807
ADK.csv	Acute Lymphoblastic Leukemia	rs138186177	10	75856024	A	G	0.023774437567541	-0.254728	0.0460047030156804	3.0735e-08	0.07667	-0.261786	0.154778
ADK.csv	Acute Lymphoblastic Leukemia	rs138437684	10	75771941	T	C	0.0176983118533309	0.992946832505998	0.0722537262147351	5.6569e-43	0.00730071	0.285664	0.621086
ADK.csv	Acute Lymphoblastic Leukemia	rs138626621	10	76467792	T	C	0.0354174910961615	-0.310666	0.0255106392881253	4.0714e-34	0.0120088	-0.445769	0.309395
ADK.csv	Acute Lymphoblastic Leukemia	rs138780162	10	75712012	A	G	0.0474740826065493	0.862224363044325	0.0214399939089541	1e-200	0.0410105	0.269245	0.277948
ADK.csv	Acute Lymphoblastic Leukemia	rs139236357	10	76382714	A	G	0.0174378344350016	1.48834700673783	0.0429153428891275	1e-200	0.0353391	0.41937	0.0965695
ADK.csv	Acute Lymphoblastic Leukemia	rs141257383	10	76071857	A	G	0.0274087932647334	-0.434779	0.0419662410963046	3.7617e-25	0.00778933	0.141583	0.795265
ADK.csv	Acute Lymphoblastic Leukemia	rs142499405	10	76901588	T	C	0.0369782907812261	0.336352473423606	0.0232787598657065	2.5509e-47	0.0260411	0.294643	0.337635
ADK.csv	Acute Lymphoblastic Leukemia	rs142571704	10	77160106	T	C	0.0131832128555827	0.314453155080443	0.0450054608673884	2.8123e-12	0.0088154	-0.17177	0.749846
ADK.csv	Acute Lymphoblastic Leukemia	rs143030124	10	75389385	T	C	0.0258712188218645	0.347195493167306	0.0555948652811493	4.238e-10	0.0377299	-0.0811074	0.749932
ADK.csv	Acute Lymphoblastic Leukemia	rs144641201	10	75593145	G	T	0.0188156359393232	0.710335588318817	0.088885278081838	1.332e-15	0.0201764	0.0026844	0.994125
ADK.csv	Acute Lymphoblastic Leukemia	rs144927068	10	75681642	A	G	0.0228682857649353	0.26188785076435	0.0446138653113831	4.358e-09	0.0428977	0.220408	0.349727
ADK.csv	Acute Lymphoblastic Leukemia	rs147020623	10	76570249	G	T	0.0139135583185317	-0.305048	0.0519336185574717	4.254e-09	0.0109182	-0.562291	0.230958
ADK.csv	Acute Lymphoblastic Leukemia	rs151111010	10	77155515	A	G	0.0210265327150953	0.527453285777698	0.0398264309169346	4.9005e-40	0.00562839	0.644719	0.319995
ADK.csv	Acute Lymphoblastic Leukemia	rs151229713	10	75999969	T	C	0.0208419742845292	-0.311143	0.0356406471858303	2.5422e-18	0.0271098	-0.120689	0.692534
ADK.csv	Acute Lymphoblastic Leukemia	rs2227581	10	75671875	A	G	0.0717874543239951	-0.185878	0.0239004148242832	7.403e-15	0.0459146	-0.287106	0.22763
ADK.csv	Acute Lymphoblastic Leukemia	rs2633298	10	75666339	C	G	0.693762742580986	0.0588154510448297	0.00947184975357593	5.3187e-10	0.385254	0.0681948	0.494732
ADK.csv	Acute Lymphoblastic Leukemia	rs2675660	10	75707022	C	T	0.693164546836253	0.342483447030152	0.00974639499794113	1e-200	0.260592	-0.0955666	0.39341
ADK.csv	Acute Lymphoblastic Leukemia	rs2860140	10	77084450	T	C	0.29917321051042	-0.0665642	0.00953423927063927	2.9184e-12	0.218842	-0.00287228	0.980504
ADK.csv	Acute Lymphoblastic Leukemia	rs4237279	10	75913298	G	A	0.0648261304299522	-0.260228	0.021557036701635	1.492e-33	0.025736	0.175128	0.564713
ADK.csv	Acute Lymphoblastic Leukemia	rs4745745	10	76195356	A	G	0.85774886877828	-0.158178	0.0129333712969982	2.1441e-34	0.127086	0.33145	0.0243843
ADK.csv	Acute Lymphoblastic Leukemia	rs4746226	10	76504582	G	T	0.256428048263367	0.562032069272703	0.0101037838358158	1e-200	0.269244	0.167511	0.126323
ADK.csv	Acute Lymphoblastic Leukemia	rs55982070	10	77121473	T	C	0.0381089688414529	-0.215558	0.024362090686216	8.8942e-19	0.0642147	-0.363808	0.0671259
ADK.csv	Acute Lymphoblastic Leukemia	rs56143221	10	75491213	A	G	0.0853989155693261	-0.157073	0.0177135903417139	7.4739e-19	0.150566	0.146497	0.282437
ADK.csv	Acute Lymphoblastic Leukemia	rs56389499	10	76340189	T	C	0.0163339382940109	-0.346901	0.0416617654355891	8.3197e-17	0.0114021	-0.375762	0.422687
ADK.csv	Acute Lymphoblastic Leukemia	rs56756262	10	75589493	G	A	0.19173122591194	0.192624410668146	0.0112632022189173	1.434e-65	0.190327	-0.121766	0.328957
ADK.csv	Acute Lymphoblastic Leukemia	rs61559304	10	76579821	A	G	0.0394883433051372	0.170071349582277	0.0234458283358071	4.0584e-13	0.00677656	0.134428	0.818173
ADK.csv	Acute Lymphoblastic Leukemia	rs61862619	10	76529419	G	T	0.0277896081771721	1.05187468988278	0.0315687734995628	1e-200	0.0279236	-0.341211	0.268093
ADK.csv	Acute Lymphoblastic Leukemia	rs71473718	10	75811479	C	T	0.0227387697288547	1.30403726729119	0.0339217602208804	1e-200	0.0304318	-0.084406	0.763454
ADK.csv	Acute Lymphoblastic Leukemia	rs72803498	10	76835438	A	T	0.0317135873229939	0.222231884442996	0.0263370329986959	3.2281e-17	0.00316177	-0.0990843	0.907537
ADK.csv	Acute Lymphoblastic Leukemia	rs72805337	10	76874459	T	C	0.0428852579065403	-0.147621	0.0237504795021149	5.1129e-10	0.0360478	-0.577466	0.0262525
ADK.csv	Acute Lymphoblastic Leukemia	rs72807437	10	77105866	C	T	0.0184207954656503	0.282227555633142	0.0369882251622686	2.3475e-14	0.00485303	0.411924	0.564836
ADK.csv	Acute Lymphoblastic Leukemia	rs72818590	10	76241121	T	C	0.0166431842197957	1.15300436892658	0.0368501508174304	1e-200	0.0142758	-0.0277656	0.946878
ADK.csv	Acute Lymphoblastic Leukemia	rs72820510	10	76372489	A	G	0.0686285245004106	-0.375437	0.0208402196363542	1.4858e-72	0.111591	-0.151268	0.329633
ADK.csv	Acute Lymphoblastic Leukemia	rs73279160	10	76959108	T	G	0.103715170278638	-0.149645	0.014319410360479	1.456e-25	0.0834163	0.113864	0.51878
ADK.csv	Acute Lymphoblastic Leukemia	rs74516605	10	77020490	T	G	0.042433100966944	0.169586795074268	0.0236605225077458	7.6435e-13	0.0613102	-0.0544507	0.789434
ADK.csv	Acute Lymphoblastic Leukemia	rs75582317	10	75903662	C	T	0.0253837424595353	-0.397598	0.0347435115980377	2.5199e-30	0.0312319	0.438891	0.118109
ADK.csv	Acute Lymphoblastic Leukemia	rs75670601	10	76547290	C	T	0.0134715025906736	-0.426974	0.0658168743523118	8.733e-11	0.0039501	-1.03807	0.184217
ADK.csv	Acute Lymphoblastic Leukemia	rs77247330	10	76847248	A	G	0.0145768833849329	-0.294551	0.0474438985902096	5.3527e-10	0.022008	-0.249005	0.448961
ADK.csv	Acute Lymphoblastic Leukemia	rs77733275	10	75574482	A	G	0.0162665652835108	0.809000241270826	0.0414368301741384	6.9187e-85	0.00513845	0.42855	0.544988
ADK.csv	Acute Lymphoblastic Leukemia	rs78398862	10	75780742	G	C	0.943025815489294	-0.235255	0.019382615597225	6.6919e-34	0.0451833	-0.0277156	0.907083
ADK.csv	Acute Lymphoblastic Leukemia	rs7899137	10	76668462	A	C	0.546742270708464	0.287331607586319	0.00937891844490676	1e-200	0.445897	0.0382143	0.696421
ADK.csv	Acute Lymphoblastic Leukemia	rs79014227	10	75855980	T	C	0.0594253604749788	-0.374558	0.0219244784412594	1.9459e-65	0.070152	0.0392248	0.837356
ADK.csv	Acute Lymphoblastic Leukemia	rs79392271	10	76379784	A	G	0.0158949136276392	-0.471264	0.061923618275627	2.7325e-14	0.0166974	0.251888	0.505643
ADK.csv	Acute Lymphoblastic Leukemia	rs80080009	10	76173705	G	A	0.0286176645941572	-0.408946	0.0391399496545828	1.4902e-25	0.0226906	0.617314	0.0629825
ADK.csv	Acute Lymphoblastic Leukemia	rs80341670	10	76528852	C	T	0.0219773299748111	-0.283074	0.0385832819805132	2.1876e-13	0.013153	-0.232089	0.606551
ADK.csv	Acute Lymphoblastic Leukemia	rs839707	10	76513788	T	C	0.196669493485468	-0.233714	0.0110995207247271	1.9979e-98	0.190708	-0.157708	0.205112
ADO.csv	Acute Lymphoblastic Leukemia	rs10822077	10	64639899	G	A	0.554604261796043	0.050421446852855	0.00803465012395108	3.4874e-10	0.445229	0.0219079	0.822802
ADO.csv	Acute Lymphoblastic Leukemia	rs113879650	10	64448777	A	G	0.0534051558291651	-0.130174	0.0178433199348486	2.9777e-13	0.122741	0.130884	0.378872
ADO.csv	Acute Lymphoblastic Leukemia	rs117066695	10	64723427	G	A	0.0460170146945089	-0.137539	0.0205174636250205	2.0335e-11	0.0494664	0.265863	0.243418
ADO.csv	Acute Lymphoblastic Leukemia	rs139020900	10	64709230	T	C	0.0298971861471861	0.156280950195866	0.0251518387697539	5.185e-10	0.0125197	-0.630601	0.15517
ADO.csv	Acute Lymphoblastic Leukemia	rs141915514	10	64798736	G	A	0.0156597774244833	0.219537168918583	0.0368054534801809	2.4493e-09	0.00208435	0.106274	0.921195
ADO.csv	Acute Lymphoblastic Leukemia	rs1509963	10	64570411	T	C	0.0697998093422307	-0.176405	0.0156854687965439	2.4069e-29	0.14218	0.0991788	0.476597
ADO.csv	Acute Lymphoblastic Leukemia	rs2138561	10	64335087	C	T	0.0812404870624049	-0.086619	0.0146165344986414	3.1002e-09	0.09298	-0.0623021	0.705641
ADO.csv	Acute Lymphoblastic Leukemia	rs224082	10	64566258	T	C	0.60334849111203	0.219210458090411	0.00812037955371201	1.6918e-160	0.383807	-0.145771	0.145567
ADO.csv	Acute Lymphoblastic Leukemia	rs2393899	10	64350628	T	A	0.54528883376555	-0.0845922	0.00797806546281816	2.8796e-26	0.486642	0.109955	0.260577
ADO.csv	Acute Lymphoblastic Leukemia	rs34299154	10	64423416	A	C	0.915506759459243	0.187058159819286	0.014659730393361	2.742e-37	0.0374043	0.237435	0.362443
ADO.csv	Acute Lymphoblastic Leukemia	rs34632941	10	64414265	T	C	0.0848452295695074	0.109126989621993	0.0146001002919288	7.7675e-14	0.119269	-0.331535	0.0270813
ADO.csv	Acute Lymphoblastic Leukemia	rs7068164	10	64401056	A	C	0.423663545756569	-0.104959	0.00805466107872747	8.1746e-39	0.432052	0.0170442	0.861873
ADO.csv	Acute Lymphoblastic Leukemia	rs7075756	10	64598581	A	C	0.0454442429737081	-0.112492	0.0206100953971799	4.8099e-08	0.060333	-0.085291	0.678008
ADO.csv	Acute Lymphoblastic Leukemia	rs72834725	10	64447963	T	C	0.0391717963066592	0.158150618372287	0.0216638747393615	2.8734e-13	0.0432979	0.00130185	0.99567
ADO.csv	Acute Lymphoblastic Leukemia	rs9943383	10	64429757	A	T	0.183558471632574	-0.115172	0.0103767055162061	1.2657e-28	0.176445	-0.0533891	0.672055
ADRB1.csv	Acute Lymphoblastic Leukemia	rs1034257	10	115832597	A	G	0.760024803637867	-0.0731858	0.010150178146046	5.5788e-13	0.235239	-0.026397	0.817765
ADRB1.csv	Acute Lymphoblastic Leukemia	rs10787511	10	115747997	A	G	0.475934314835787	-0.0483552	0.00869916667249245	2.7164e-08	0.439511	0.0953971	0.330265
ADRB1.csv	Acute Lymphoblastic Leukemia	rs10885545	10	116076578	A	G	0.833820264111254	0.0707578201968934	0.0118560044565093	2.4018e-09	0.171766	0.115876	0.372115
ADRB1.csv	Acute Lymphoblastic Leukemia	rs117126153	10	115972052	C	T	0.0191411935953421	0.358116280899631	0.044025457740633	4.1467e-16	0.0139477	0.376787	0.371596
ADRB1.csv	Acute Lymphoblastic Leukemia	rs117648943	10	115846302	G	A	0.0138373270334121	0.515320120510501	0.0786328100267797	5.6242e-11	0.00812281	-0.0993991	0.859279
ADRB1.csv	Acute Lymphoblastic Leukemia	rs238746	10	115766996	A	C	0.415864567999094	-0.0564563	0.00881427705824051	1.5017e-10	0.476489	-0.00666399	0.945404
ADRB1.csv	Acute Lymphoblastic Leukemia	rs2927513	10	115958464	A	G	0.417490752623235	0.105583528990102	0.00880919845398665	4.2277e-33	0.399796	0.0623714	0.529317
ADRB1.csv	Acute Lymphoblastic Leukemia	rs4917675	10	115799477	C	T	0.242342816340336	0.252071499194562	0.0101162435715687	4.8201e-137	0.275184	0.17353	0.108813
ADRB1.csv	Acute Lymphoblastic Leukemia	rs4917676	10	115822543	C	T	0.153277278807567	-0.139466	0.0121343113700402	1.4207e-30	0.143807	-0.263809	0.0590731
ADRB1.csv	Acute Lymphoblastic Leukemia	rs4918894	10	116040773	C	T	0.395994752592957	0.0574586045447892	0.00925736362453908	5.4074e-10	0.456717	0.145901	0.139063
ADRB1.csv	Acute Lymphoblastic Leukemia	rs659280	10	115899581	G	A	0.164231354642314	0.0768896052353607	0.011773382316923	6.5507e-11	0.19255	0.0244743	0.844103
ADRB1.csv	Acute Lymphoblastic Leukemia	rs72823019	10	115795716	A	C	0.0252020725388601	0.423416620578349	0.0290453031718331	3.8999e-48	0.0266579	0.288768	0.330268
ADRB1.csv	Acute Lymphoblastic Leukemia	rs77030796	10	115748636	T	G	0.0502006497229123	-0.128533	0.0200195370171759	1.3574e-10	0.0595718	-0.33548	0.0977372
ADSS.csv	Acute Lymphoblastic Leukemia	rs10429916	1	244391688	A	G	0.697329556949221	0.0716003030635079	0.00906528025822113	2.8296e-15	0.306977	-0.281641	0.00726591
ADSS.csv	Acute Lymphoblastic Leukemia	rs10803194	1	244449423	G	A	0.456697108066971	0.0801888255239408	0.00814273352937588	7.0061e-23	0.419906	-0.0899507	0.363093
ADSS.csv	Acute Lymphoblastic Leukemia	rs10927175	1	244396192	T	C	0.55507801912727	-0.0860776	0.00822332417482946	1.2169e-25	0.400759	0.0183	0.853565
ADSS.csv	Acute Lymphoblastic Leukemia	rs113926484	1	244418446	A	G	0.017339593114241	0.223407746523948	0.0382213728634151	5.0657e-09	0.0199942	0.138234	0.687167
ADSS.csv	Acute Lymphoblastic Leukemia	rs114127242	1	244786951	A	G	0.0147261284295408	-0.249362	0.041942672005387	2.7578e-09	0.0107927	0.22582	0.622313
ADSS.csv	Acute Lymphoblastic Leukemia	rs115624382	1	244507520	T	C	0.0275972518800483	0.257133700979789	0.0269495457620857	1.4119e-21	0.0231354	-0.168204	0.597231
ADSS.csv	Acute Lymphoblastic Leukemia	rs12058146	1	244535996	C	T	0.0375314374153608	-0.155744	0.0236305256866341	4.3746e-11	0.0670877	0.117051	0.560504
ADSS.csv	Acute Lymphoblastic Leukemia	rs12093926	1	244511972	T	C	0.169020050833098	0.0731407272346148	0.0127738878819754	1.0307e-08	0.302859	0.145289	0.17688
ADSS.csv	Acute Lymphoblastic Leukemia	rs12125993	1	244362410	A	G	0.145180935916074	0.0681853682628511	0.0116739775823262	5.2013e-09	0.132497	0.0517157	0.719558
ADSS.csv	Acute Lymphoblastic Leukemia	rs141144633	1	244397543	C	T	0.032511602375368	-0.153844	0.0256551981341266	2.0149e-09	0.0630305	0.300155	0.136837
ADSS.csv	Acute Lymphoblastic Leukemia	rs142467319	1	244452112	A	C	0.0217889908256881	-0.273966	0.0321907535566073	1.7274e-17	0.018562	0.838813	0.0248073
ADSS.csv	Acute Lymphoblastic Leukemia	rs1484566	1	244487598	G	T	0.657081181096292	-0.31498	0.00859268095808051	1e-200	0.371279	-0.0125287	0.901128
ADSS.csv	Acute Lymphoblastic Leukemia	rs151181349	1	244601224	C	T	0.0195124255882075	-0.4864	0.0496939967251103	1.2678e-22	0.0319246	-0.00965707	0.973259
ADSS.csv	Acute Lymphoblastic Leukemia	rs1542647	1	244536723	G	T	0.777777777777778	-0.101379	0.0133970111261284	3.8077e-14	0.252751	0.0257419	0.821238
ADSS.csv	Acute Lymphoblastic Leukemia	rs186777368	1	244511935	T	C	0.0138999557326251	-0.806702	0.0483240570360044	1.4541e-62	0.054748	0.206318	0.338062
ADSS.csv	Acute Lymphoblastic Leukemia	rs189962818	1	244788061	G	A	0.0170367858959146	-0.284379	0.0503058325411459	1.5767e-08	0.0505126	-0.171162	0.438406
ADSS.csv	Acute Lymphoblastic Leukemia	rs28433109	1	244835803	G	A	0.0217302487104847	-0.19977	0.0315074542204671	2.2887e-10	0.0259397	0.147134	0.631555
ADSS.csv	Acute Lymphoblastic Leukemia	rs3102463	1	244544458	A	G	0.418503233492172	-0.0811077	0.00862544587239585	5.2828e-21	0.450487	0.0229964	0.81436
ADSS.csv	Acute Lymphoblastic Leukemia	rs3123693	1	244497985	C	G	0.532898761278483	-0.251005	0.00814639144445046	1e-200	0.569849	0.0675374	0.493603
ADSS.csv	Acute Lymphoblastic Leukemia	rs34354966	1	244338537	A	T	0.0970543621862309	-0.0868528	0.0152450820870495	1.2179e-08	0.0893561	0.136725	0.42594
ADSS.csv	Acute Lymphoblastic Leukemia	rs35372186	1	244631484	C	T	0.164269535673839	0.127883643700647	0.0109093397001166	9.8091e-32	0.128019	0.210288	0.148335
ADSS.csv	Acute Lymphoblastic Leukemia	rs4376719	1	244511981	A	G	0.680427782888684	-0.188965	0.0132883368827653	6.8461e-46	0.268021	0.0597835	0.593029
ADSS.csv	Acute Lymphoblastic Leukemia	rs4658625	1	244508949	G	A	0.408280783899105	0.174795580638886	0.00822474547057677	3.1324e-100	0.364181	-0.0210842	0.835198
ADSS.csv	Acute Lymphoblastic Leukemia	rs4658636	1	244545766	T	C	0.460859107820662	-0.114677	0.00809342048245657	1.4171e-45	0.490823	-0.0661247	0.498475
ADSS.csv	Acute Lymphoblastic Leukemia	rs55711208	1	244335955	C	T	0.158542617960426	-0.0837046	0.0111049418015317	4.787e-14	0.176111	0.000896735	0.994441
ADSS.csv	Acute Lymphoblastic Leukemia	rs56100931	1	244334128	G	T	0.277739726027397	0.0608105660180521	0.00905606427765896	1.8832e-11	0.272284	-0.139296	0.202759
ADSS.csv	Acute Lymphoblastic Leukemia	rs58026052	1	244489661	T	C	0.024998945192186	-0.454901	0.0270541136712833	1.9078e-63	0.0284096	0.0130616	0.965089
ADSS.csv	Acute Lymphoblastic Leukemia	rs595773	1	244496636	C	T	0.228919330289193	0.121351749899009	0.00965415396295987	3.0951e-36	0.26568	0.0335658	0.760361
ADSS.csv	Acute Lymphoblastic Leukemia	rs60534367	1	244457753	G	A	0.0291563275434243	-0.270986	0.0337005395260185	8.9108e-16	0.0392203	-0.0341456	0.89234
ADSS.csv	Acute Lymphoblastic Leukemia	rs61842333	1	244567046	C	T	0.0154267697620299	0.239861623313004	0.04345476707725	3.3939e-08	0.0119145	0.133488	0.764541
ADSS.csv	Acute Lymphoblastic Leukemia	rs658757	1	244499769	C	A	0.321695666879627	0.148070104570916	0.00863639359639984	6.8735e-66	0.285663	-0.0850648	0.42867
ADSS.csv	Acute Lymphoblastic Leukemia	rs6669058	1	244513802	T	C	0.216082713382929	0.13313915321611	0.0100690600347972	6.5151e-40	0.217321	-0.211819	0.0733432
ADSS.csv	Acute Lymphoblastic Leukemia	rs6677179	1	244385855	G	T	0.154933564849766	-0.254883	0.0111706314241167	3.0808e-115	0.189467	0.0935565	0.451623
ADSS.csv	Acute Lymphoblastic Leukemia	rs6692542	1	244391618	A	G	0.348397158856026	0.064552049527273	0.00846717509998596	2.467e-14	0.368288	0.10044	0.321527
ADSS.csv	Acute Lymphoblastic Leukemia	rs72765888	1	244461792	G	T	0.154672272119243	-0.458713	0.0112385373116257	1e-200	0.155062	0.0527297	0.695543
ADSS.csv	Acute Lymphoblastic Leukemia	rs74823975	1	244487527	A	G	0.0210581502031544	-0.652764	0.0299713648636647	3.6222e-105	0.0324848	0.257038	0.352726
ADSS.csv	Acute Lymphoblastic Leukemia	rs7532274	1	244417178	C	A	0.096524109729085	-0.116076	0.016247588204416	9.039e-13	0.120258	0.127174	0.400523
ADSS.csv	Acute Lymphoblastic Leukemia	rs76400271	1	244457091	G	A	0.0290599845377234	0.213744938532107	0.0260562876111891	2.3446e-16	0.0191712	0.410647	0.257723
ADSS.csv	Acute Lymphoblastic Leukemia	rs871141	1	244376500	C	A	0.326643507155534	0.101752280090723	0.00861986039872614	3.7042e-32	0.299775	-0.193208	0.0678578
ADSS.csv	Acute Lymphoblastic Leukemia	rs900894	1	244512151	A	G	0.618573010599589	0.0754482993097471	0.0111755390611665	1.4683e-11	0.436007	-0.110237	0.271308
ADTRP.csv	Acute Lymphoblastic Leukemia	rs10485419	6	11834552	G	A	0.841076864535769	-0.12322	0.0212690014208892	6.8893e-09	0.137633	-0.0383956	0.787889
ADTRP.csv	Acute Lymphoblastic Leukemia	rs12199398	6	11790635	C	T	0.484620847902098	-0.10622	0.0190748108130419	2.5679e-08	0.498953	-0.163078	0.107683
ADTRP.csv	Acute Lymphoblastic Leukemia	rs13215825	6	11731887	C	A	0.0693741979316072	0.323357233322443	0.0306035617378803	4.2838e-26	0.116372	-0.0299654	0.841885
ADTRP.csv	Acute Lymphoblastic Leukemia	rs145813896	6	11671996	C	A	0.0278755008306459	-0.544681	0.0628772903930522	4.6032e-18	0.0196924	-0.237226	0.528698
ADTRP.csv	Acute Lymphoblastic Leukemia	rs210920	6	11710554	A	G	0.119634703196347	-0.347487	0.0239606425664246	1.1699e-47	0.0948913	0.144383	0.408736
ADTRP.csv	Acute Lymphoblastic Leukemia	rs4713857	6	11761459	G	A	0.155084936861094	-0.230488	0.0214829260265247	7.4397e-27	0.161052	-0.0284164	0.82991
ADTRP.csv	Acute Lymphoblastic Leukemia	rs6929400	6	11774792	C	T	0.365423767154275	-0.122297	0.0162316210715096	4.8983e-14	0.319877	0.0134009	0.898404
ADTRP.csv	Acute Lymphoblastic Leukemia	rs72819619	6	11670662	A	G	0.0748877061865398	0.182788283566283	0.0295448832298253	6.1398e-10	0.123466	-0.132471	0.368111
ADTRP.csv	Acute Lymphoblastic Leukemia	rs72821888	6	11874083	T	C	0.0299695459579181	-0.392567	0.0563628714145379	3.2794e-12	0.0247968	0.170844	0.598577
ADTRP.csv	Acute Lymphoblastic Leukemia	rs75743169	6	11736202	A	G	0.958354239839438	-0.681656	0.0393515923144874	3.1989e-67	0.0579589	-0.346991	0.0925231
ADTRP.csv	Acute Lymphoblastic Leukemia	rs76233944	6	11751769	T	C	0.0316669378457533	-0.269964	0.0444115180594773	1.2109e-09	0.012855	-0.278726	0.520469
ADTRP.csv	Acute Lymphoblastic Leukemia	rs77296737	6	11692625	C	T	0.0491359618631443	0.39331947356038	0.0496628038031743	2.3828e-15	0.0304367	0.353091	0.224155
ADTRP.csv	Acute Lymphoblastic Leukemia	rs9368883	6	11786165	A	G	0.4689202901274	0.0936397513233194	0.0155822130867174	1.8644e-09	0.450745	0.10923	0.273387
ADTRP.csv	Acute Lymphoblastic Leukemia	rs9469930	6	11721221	G	A	0.676945723560051	-0.333173	0.0166281462068373	2.6315e-89	0.361529	-0.173265	0.0858954
ADTRP.csv	Acute Lymphoblastic Leukemia	rs9469947	6	11730720	C	A	0.167767627963159	0.201952685137331	0.0208129983033774	2.9219e-22	0.101398	0.144597	0.370723
AEN.csv	Acute Lymphoblastic Leukemia	rs112248718	15	89162709	A	G	0.105047801147228	-0.13931	0.0130508974108917	1.3383e-26	0.137788	0.0398468	0.781047
AEN.csv	Acute Lymphoblastic Leukemia	rs12900570	15	89036091	A	G	0.701712328767123	0.073632740645467	0.00872839505043469	3.2894e-17	0.259853	0.0930724	0.400039
AEN.csv	Acute Lymphoblastic Leukemia	rs146743950	15	89179320	A	G	0.0388229595543715	0.807555505378397	0.0228246173889979	1e-200	0.0658286	0.269154	0.170466
AEN.csv	Acute Lymphoblastic Leukemia	rs149159249	15	88546780	T	C	0.0246436846170048	0.419157494335159	0.0382164017446352	5.4464e-28	0.0288773	0.53717	0.0628362
AEN.csv	Acute Lymphoblastic Leukemia	rs149399925	15	89491155	A	G	0.0259234608985025	0.289801672539828	0.0313865760388841	2.6267e-20	0.0401888	0.299525	0.233501
AEN.csv	Acute Lymphoblastic Leukemia	rs34385252	15	89161257	T	C	0.32659619777752	0.113361301676466	0.00857725582994483	7.0561e-40	0.407788	0.0431606	0.66261
AEN.csv	Acute Lymphoblastic Leukemia	rs35985219	15	88911726	C	A	0.0326322145624717	0.299785804467358	0.0251969544086133	1.218e-32	0.0351478	0.644379	0.0159199
AEN.csv	Acute Lymphoblastic Leukemia	rs4932192	15	89203293	C	A	0.191916271539262	0.150451761409539	0.0101954882466635	2.79e-49	0.336634	0.25957	0.0121358
AEN.csv	Acute Lymphoblastic Leukemia	rs57014063	15	89263448	A	G	0.96337609928808	-0.135976	0.0212638263160473	1.6076e-10	0.0378413	-0.0638129	0.805046
AEN.csv	Acute Lymphoblastic Leukemia	rs7168986	15	89245950	T	C	0.796566753326197	-0.0672406	0.00993962509372466	1.3331e-11	0.125499	-0.20542	0.16276
AEN.csv	Acute Lymphoblastic Leukemia	rs73451723	15	89164413	C	T	0.121798792141274	-0.201328	0.0122329679412116	7.3489e-61	0.117203	-0.199659	0.194829
AEN.csv	Acute Lymphoblastic Leukemia	rs75271414	15	88999157	A	G	0.0336747539482719	-0.181634	0.0261028676350065	3.4416e-12	0.0357411	0.167146	0.530132
AEN.csv	Acute Lymphoblastic Leukemia	rs8031562	15	89175426	T	C	0.0255180353031466	-0.264099	0.0265479632514063	2.5679e-23	0.023261	0.269344	0.414851
AFF4.csv	Acute Lymphoblastic Leukemia	rs10223229	5	132295979	A	T	0.180042278509683	-0.147981	0.0103583896997147	2.6677e-46	0.109836	-0.208358	0.175096
AFF4.csv	Acute Lymphoblastic Leukemia	rs11242137	5	132457692	A	G	0.493979169086615	-0.0441392	0.00804550284453941	4.1067e-08	0.35411	-0.125046	0.219328
AFF4.csv	Acute Lymphoblastic Leukemia	rs13161513	5	132383462	T	C	0.0829485206088592	0.110288576166817	0.0151964968882973	3.946e-13	0.160929	0.306769	0.0209002
AFF4.csv	Acute Lymphoblastic Leukemia	rs30177	5	132202411	C	G	0.296395820805773	0.160510441005072	0.00869904566051931	5.0812e-76	0.419226	0.183303	0.0625806
AFF4.csv	Acute Lymphoblastic Leukemia	rs34967240	5	132254627	A	G	0.0143142476697736	0.345672528680054	0.0608171520250631	1.3189e-08	0.0126564	0.608065	0.16155
AFF4.csv	Acute Lymphoblastic Leukemia	rs72801480	5	132466540	C	T	0.0641238827686552	0.0972204803178154	0.0169120273314921	9.0092e-09	0.049884	0.152558	0.502993
AFF4.csv	Acute Lymphoblastic Leukemia	rs73268661	5	132369401	T	C	0.0245905229044407	0.212997060129147	0.0273297398030624	6.5126e-15	0.00855375	-0.231762	0.652328
AGAP1.csv	Acute Lymphoblastic Leukemia	rs10184261	2	236830095	T	A	0.615567293125333	0.0920472685055864	0.00849418802247833	2.314e-27	0.404151	-0.0274111	0.783132
AGAP1.csv	Acute Lymphoblastic Leukemia	rs1040181	2	236615612	C	A	0.251934911466002	-0.16795	0.00919954213578602	1.8403e-74	0.225511	-0.127616	0.270036
AGAP1.csv	Acute Lymphoblastic Leukemia	rs10929143	2	236561965	T	G	0.134153498871332	0.13582296164764	0.0126238904052011	5.3634e-27	0.175891	0.0147709	0.908631
AGAP1.csv	Acute Lymphoblastic Leukemia	rs114709903	2	236509509	G	A	0.0520914020139427	-0.155148	0.0199206699882798	6.7863e-15	0.0734241	-0.0268871	0.887438
AGAP1.csv	Acute Lymphoblastic Leukemia	rs116112296	2	236638915	T	C	0.0158241599073001	0.305636918688184	0.0412337491316034	1.2422e-13	0.039242	0.276356	0.265918
AGAP1.csv	Acute Lymphoblastic Leukemia	rs116158252	2	236685278	T	C	0.0284739044263378	0.290537129794673	0.0256063324427058	7.7456e-30	0.0190203	0.831965	0.0207463
AGAP1.csv	Acute Lymphoblastic Leukemia	rs116415416	2	236507158	G	A	0.0700900609829975	-0.114987	0.0160927086866577	8.9734e-13	0.0483902	-0.246408	0.272701
AGAP1.csv	Acute Lymphoblastic Leukemia	rs11693354	2	236533344	T	G	0.334792739298733	-0.113162	0.00844637044235514	6.2282e-41	0.312771	-0.119617	0.253785
AGAP1.csv	Acute Lymphoblastic Leukemia	rs12473883	2	236559912	T	G	0.530098934550989	-0.0511081	0.00802854866832	1.9427e-10	0.490535	0.109752	0.261036
AGAP1.csv	Acute Lymphoblastic Leukemia	rs12994503	2	236806694	A	G	0.402751155710903	0.0836160315028041	0.00812745127893431	7.9817e-25	0.347271	0.0533817	0.601724
AGAP1.csv	Acute Lymphoblastic Leukemia	rs13022599	2	236618069	C	T	0.176165906727462	-0.114434	0.0107408208514568	1.6667e-26	0.203539	-0.0200419	0.869207
AGAP1.csv	Acute Lymphoblastic Leukemia	rs143803699	2	236902252	G	C	0.0166080593043148	0.193650177322015	0.0343771950297376	1.771e-08	0.00624147	-0.275645	0.646167
AGAP1.csv	Acute Lymphoblastic Leukemia	rs147349139	2	236686327	G	A	0.0218921196797303	-0.185943	0.0285780797353977	7.6871e-11	0.0244349	-0.270329	0.384224
AGAP1.csv	Acute Lymphoblastic Leukemia	rs1516279	2	236633002	C	G	0.342326863529945	0.264545510587106	0.00841761733594375	1e-200	0.419688	0.128946	0.189063
AGAP1.csv	Acute Lymphoblastic Leukemia	rs2138498	2	236619166	T	G	0.0379493715390701	0.234097390552905	0.0222695386751241	7.6063e-26	0.0212337	-0.543705	0.11281
AGAP1.csv	Acute Lymphoblastic Leukemia	rs35638970	2	236533100	A	G	0.0284874744758205	-0.151388	0.0269144556739501	1.8551e-08	0.0281646	0.259452	0.379345
AGAP1.csv	Acute Lymphoblastic Leukemia	rs35883154	2	236530284	T	C	0.0929052036469324	-0.0868006	0.0140681605811679	6.8204e-10	0.0987256	-0.299006	0.0691226
AGAP1.csv	Acute Lymphoblastic Leukemia	rs3768969	2	236619385	T	C	0.582149315422371	0.0644650203912076	0.00921310548530214	2.615e-12	0.397122	-0.0352575	0.722079
AGAP1.csv	Acute Lymphoblastic Leukemia	rs4663621	2	236767343	G	A	0.0689279571947258	0.0985999574776297	0.0158464783320417	4.9086e-10	0.090147	-0.295077	0.0847305
AGAP1.csv	Acute Lymphoblastic Leukemia	rs72975243	2	236644069	T	C	0.0484779917175426	0.213876099387138	0.0195764012912476	8.7348e-28	0.0751627	-0.146306	0.428775
AGAP1.csv	Acute Lymphoblastic Leukemia	rs72991127	2	236906094	C	G	0.262120108020061	0.0683369174406507	0.0095762275529562	9.6086e-13	0.311605	0.0355742	0.735978
AGAP1.csv	Acute Lymphoblastic Leukemia	rs75303249	2	236815427	A	G	0.036001589035654	-0.136524	0.0240062701952774	1.2929e-08	0.0393097	-0.248365	0.322743
AGAP1.csv	Acute Lymphoblastic Leukemia	rs75548872	2	236619713	C	T	0.232161638527539	-0.0922767	0.0110609066003561	7.2552e-17	0.315299	-0.102247	0.329825
AGAP1.csv	Acute Lymphoblastic Leukemia	rs76005824	2	236618940	T	C	0.0459754617769988	-0.124624	0.0205050768666155	1.2184e-09	0.0442393	0.0331911	0.890434
AGAP1.csv	Acute Lymphoblastic Leukemia	rs76732686	2	236779951	T	C	0.0296827531251556	-0.170148	0.0263832208070571	1.1244e-10	0.0399493	0.0852569	0.734015
AGAP1.csv	Acute Lymphoblastic Leukemia	rs77571299	2	236644765	T	C	0.0370455803653811	0.312359998847274	0.022982010730771	4.5038e-42	0.0573773	0.369419	0.0847579
AGXT2L2.csv	Acute Lymphoblastic Leukemia	rs113554551	5	177606004	A	G	0.0253873763459687	0.180334313604715	0.0297409604361696	1.3327e-09	0.0368991	0.488085	0.062296
AGXT2L2.csv	Acute Lymphoblastic Leukemia	rs11948620	5	177683459	A	G	0.072173124858373	0.0915942410676526	0.0167927253350786	4.9194e-08	0.067724	-0.101215	0.598821
AGXT2L2.csv	Acute Lymphoblastic Leukemia	rs2913816	5	177627170	A	G	0.338475703709271	0.0815504842593765	0.00916081421904679	5.4849e-19	0.31632	0.163949	0.119943
AGXT2L2.csv	Acute Lymphoblastic Leukemia	rs62388741	5	177657172	C	A	0.188194525109382	-0.0886323	0.0112568930638524	3.4403e-15	0.159528	0.0402334	0.763006
AGXT2L2.csv	Acute Lymphoblastic Leukemia	rs6899215	5	177663552	C	T	0.335631952484019	0.138354687770194	0.0106238722084154	9.078e-39	0.308434	0.150195	0.152211
AHI1.csv	Acute Lymphoblastic Leukemia	rs112081821	6	136142523	T	C	0.0139953513673903	0.254889763706968	0.0378466715725735	1.6416e-11	0.00645234	-1.03347	0.102664
AHI1.csv	Acute Lymphoblastic Leukemia	rs112172401	6	135777134	C	T	0.0185700777474259	0.274256177163685	0.0379630105565502	5.0406e-13	0.03107	-0.486126	0.0858519
AHI1.csv	Acute Lymphoblastic Leukemia	rs112380674	6	136202582	A	G	0.012073961639299	0.332215310913314	0.0583253411951253	1.2279e-08	0.00662591	-0.283582	0.643198
AHI1.csv	Acute Lymphoblastic Leukemia	rs113837761	6	136286898	T	G	0.0236517757100404	-0.207582	0.029081299507563	9.4561e-13	0.00905732	-0.494619	0.340767
AHI1.csv	Acute Lymphoblastic Leukemia	rs116876405	6	135052491	C	T	0.0225636487953988	-0.208692	0.0275184964438288	3.3558e-14	0.0239096	0.0297386	0.924449
AHI1.csv	Acute Lymphoblastic Leukemia	rs117000450	6	135894025	C	T	0.0453816626986055	0.452582015990389	0.0212097446851868	4.9976e-101	0.0901194	-0.0335211	0.845416
AHI1.csv	Acute Lymphoblastic Leukemia	rs117580123	6	135463597	A	G	0.015625	0.248520005470389	0.0396066752944983	3.5053e-10	0.0221497	0.575428	0.0824746
AHI1.csv	Acute Lymphoblastic Leukemia	rs117782671	6	135571184	G	A	0.0322989554811885	0.243311944239593	0.0253992321352464	9.761e-22	0.0631022	0.253205	0.20659
AHI1.csv	Acute Lymphoblastic Leukemia	rs117820037	6	135824141	A	G	0.0324017820980154	0.396806519543528	0.0241714953761523	1.4646e-60	0.0162562	-0.0523978	0.891694
AHI1.csv	Acute Lymphoblastic Leukemia	rs117837168	6	135354100	G	T	0.0264667872835358	0.171549547157283	0.028189422104194	1.1606e-09	0.0331204	-0.394303	0.143946
AHI1.csv	Acute Lymphoblastic Leukemia	rs118041822	6	135064993	G	T	0.013091037402964	0.318030808293557	0.0448435995901801	1.3219e-12	0.00791477	-0.0245568	0.965679
AHI1.csv	Acute Lymphoblastic Leukemia	rs118120930	6	135785328	C	A	0.0176417370325694	0.356246086742325	0.0365006236416316	1.6749e-22	0.0548134	0.132624	0.544275
AHI1.csv	Acute Lymphoblastic Leukemia	rs12190426	6	135712438	A	G	0.2112575031145	-0.783164	0.00975023971281313	1e-200	0.222967	0.265399	0.0233394
AHI1.csv	Acute Lymphoblastic Leukemia	rs12204797	6	136186007	A	G	0.102257327602896	-0.278902	0.0132760400610752	5.542e-98	0.0842281	-0.0806483	0.649958
AHI1.csv	Acute Lymphoblastic Leukemia	rs138226358	6	135857835	G	A	0.014102682274864	0.421636522129002	0.047521726923528	7.1586e-19	0.00513159	-0.253451	0.709941
AHI1.csv	Acute Lymphoblastic Leukemia	rs138832954	6	135765602	T	G	0.0134605971610377	-0.603722	0.0533134579974938	9.9811e-30	0.00814803	-0.246141	0.63326
AHI1.csv	Acute Lymphoblastic Leukemia	rs139105487	6	135728659	C	T	0.0135202983789987	-0.729029	0.044399367584718	1.3757e-60	0.00906091	0.0231055	0.964413
AHI1.csv	Acute Lymphoblastic Leukemia	rs142480394	6	135883422	C	T	0.0132543711223914	-0.787688	0.0467581797538806	1.1226e-63	0.00697769	0.0688537	0.909718
AHI1.csv	Acute Lymphoblastic Leukemia	rs143464247	6	135571137	A	G	0.0141307556080283	-0.501301	0.0438956205532232	3.3071e-30	0.0254818	-0.575237	0.0586732
AHI1.csv	Acute Lymphoblastic Leukemia	rs145211038	6	136086892	C	T	0.02665313225058	-0.530902	0.0293885806319374	6.0122e-73	0.0298424	0.570479	0.0447353
AHI1.csv	Acute Lymphoblastic Leukemia	rs1535436	6	135773148	A	G	0.0311520014757425	-0.621143	0.024881654873222	1.5048e-137	0.0161231	0.744614	0.0106515
AHI1.csv	Acute Lymphoblastic Leukemia	rs17778438	6	135732194	A	G	0.105674859491653	0.266829393136745	0.0135261695013786	1.2696e-86	0.144886	-0.249618	0.0752489
AHI1.csv	Acute Lymphoblastic Leukemia	rs2027518	6	136214155	C	G	0.500038230683947	-0.0902764	0.0080023050191981	1.6214e-29	0.495974	0.172252	0.076662
AHI1.csv	Acute Lymphoblastic Leukemia	rs210945	6	135534823	T	C	0.0214053261218316	0.198890674109731	0.0297927850010082	2.4622e-11	0.02399	-0.294387	0.362413
AHI1.csv	Acute Lymphoblastic Leukemia	rs2297339	6	135375991	A	G	0.447144799456152	0.073146866500884	0.00800635572080909	6.4805e-20	0.487791	-0.0185789	0.84859
AHI1.csv	Acute Lymphoblastic Leukemia	rs34784084	6	135353321	T	A	0.0599860659544821	-0.159607	0.0182562273099035	2.2781e-18	0.0349062	0.371157	0.162615
AHI1.csv	Acute Lymphoblastic Leukemia	rs35195216	6	135953052	A	G	0.0190982119720135	-0.666905	0.0330939129224754	2.5846e-90	0.0336008	-0.0915274	0.7428
AHI1.csv	Acute Lymphoblastic Leukemia	rs4142308	6	136240547	T	C	0.706027779874689	-0.0495708	0.00873555593186823	1.3885e-08	0.246447	0.0298202	0.791334
AHI1.csv	Acute Lymphoblastic Leukemia	rs4895444	6	135555912	A	T	0.152887882219706	-0.063334	0.0110592359972162	1.0234e-08	0.198528	-0.150814	0.216837
AHI1.csv	Acute Lymphoblastic Leukemia	rs4896104	6	135119089	T	C	0.432597993160209	-0.044918	0.00801820795987684	2.1165e-08	0.646321	-0.0145808	0.886246
AHI1.csv	Acute Lymphoblastic Leukemia	rs55822246	6	135566081	C	A	0.176840317100793	-0.240506	0.0104315637681292	1.2865e-117	0.157607	0.131757	0.32578
AHI1.csv	Acute Lymphoblastic Leukemia	rs56002646	6	135483809	A	T	0.180599607310074	0.0624165604521009	0.0103470584109048	1.6174e-09	0.184095	0.0609518	0.628915
AHI1.csv	Acute Lymphoblastic Leukemia	rs58812725	6	135076305	A	G	0.302291344230116	0.0482712235132091	0.00866613229802142	2.5474e-08	0.288377	0.0132414	0.901185
AHI1.csv	Acute Lymphoblastic Leukemia	rs60360355	6	136124333	A	T	0.024823237148863	-0.505866	0.0257133469242062	3.645e-86	0.0250842	0.143175	0.643357
AHI1.csv	Acute Lymphoblastic Leukemia	rs62429860	6	135906898	C	A	0.0458391735451383	0.402800465815469	0.0216727179007118	4.2027e-77	0.048832	0.510585	0.0232943
AHI1.csv	Acute Lymphoblastic Leukemia	rs6570052	6	136209628	A	G	0.0596259070976755	0.173796974377356	0.0170032455805815	1.5936e-24	0.0742655	-0.343889	0.069357
AHI1.csv	Acute Lymphoblastic Leukemia	rs6917106	6	135955178	A	C	0.047905933189297	0.295484226771007	0.0193947100989811	2.0649e-52	0.071366	0.103813	0.58362
AHI1.csv	Acute Lymphoblastic Leukemia	rs6936179	6	135203094	C	T	0.158646616541353	0.072461097820891	0.0108748195793149	2.6829e-11	0.140803	-0.0942345	0.50254
AHI1.csv	Acute Lymphoblastic Leukemia	rs72970280	6	135216600	A	G	0.0419329423093758	0.157479672484471	0.0211127057895791	8.7314e-14	0.0459429	-0.266897	0.255084
AHI1.csv	Acute Lymphoblastic Leukemia	rs72980225	6	135752010	G	A	0.0345084745762712	0.334971089076737	0.0234889409483856	3.8513e-46	0.0137114	-0.851513	0.0468738
AHI1.csv	Acute Lymphoblastic Leukemia	rs72980251	6	135781159	A	G	0.0884264036998815	-0.538533	0.0140914778357979	1e-200	0.0882914	0.252937	0.140224
AHI1.csv	Acute Lymphoblastic Leukemia	rs72982175	6	135942708	G	T	0.0655086228442889	0.34778162477136	0.0180461412411586	9.2657e-83	0.0941839	-0.541414	0.00309236
AHI1.csv	Acute Lymphoblastic Leukemia	rs743589	6	135522939	C	T	0.380229280210487	0.104346507835544	0.0081837830841028	3.1015e-37	0.371801	-0.0815296	0.420687
AHI1.csv	Acute Lymphoblastic Leukemia	rs75264880	6	135894273	G	A	0.0591382231905108	0.409614127825722	0.0186882252649942	1.7421e-106	0.0562661	0.131759	0.539961
AHI1.csv	Acute Lymphoblastic Leukemia	rs76559812	6	136142578	C	A	0.0238690674669334	0.290087891821793	0.0304999307989395	1.8884e-21	0.00847073	0.0497289	0.923356
AHI1.csv	Acute Lymphoblastic Leukemia	rs76816993	6	135783556	C	T	0.01180803813238	0.473897152864686	0.0547288547020078	4.7676e-18	0.0130878	-0.0853904	0.843206
AHI1.csv	Acute Lymphoblastic Leukemia	rs76984965	6	136248929	A	G	0.08862123369377	-0.0861819	0.0141173098145294	1.0293e-09	0.0611683	-0.248611	0.22182
AHI1.csv	Acute Lymphoblastic Leukemia	rs7772778	6	135591392	G	A	0.329553635709143	-0.332844	0.00867406496759611	1e-200	0.305196	0.159118	0.137349
AHI1.csv	Acute Lymphoblastic Leukemia	rs77738787	6	135253523	A	G	0.0209663982227159	-0.365431	0.0529864125482654	5.3187e-12	0.0264414	0.517109	0.0969036
AHI1.csv	Acute Lymphoblastic Leukemia	rs7774426	6	136082343	G	A	0.0351624933404369	0.304513435125766	0.0216809611202237	8.2435e-45	0.0245307	-0.105435	0.736217
AHI1.csv	Acute Lymphoblastic Leukemia	rs78335173	6	135668989	G	A	0.01665729243283	-0.531608	0.0329077519416752	1.054e-58	0.0151681	-0.0380792	0.926058
AHI1.csv	Acute Lymphoblastic Leukemia	rs78608218	6	135923448	C	T	0.0266418543295958	-0.628555	0.0270757386258873	3.2276e-119	0.0530841	0.463481	0.0298099
AHI1.csv	Acute Lymphoblastic Leukemia	rs9376120	6	135961338	C	T	0.36938892061679	-0.472003	0.00827585313849623	1e-200	0.238117	0.230382	0.0454088
AHI1.csv	Acute Lymphoblastic Leukemia	rs958072	6	135827566	G	A	0.0897291634331833	0.341134177556704	0.0140872561532844	1.5166e-129	0.0512899999999999	-0.386166	0.0808314
AIMP2.csv	Acute Lymphoblastic Leukemia	rs10085640	7	5910106	C	G	0.313511033850017	-0.118986	0.00949219519129335	4.7915e-36	0.278702	0.274437	0.00590922
AIMP2.csv	Acute Lymphoblastic Leukemia	rs117251144	7	5899350	A	G	0.0162687042343203	0.309378783023776	0.0387746159274808	1.4776e-15	0.00486066	1.48184	0.0343954
AIMP2.csv	Acute Lymphoblastic Leukemia	rs117527598	7	5613626	T	C	0.0217800409586539	-0.177907	0.0318446845844436	2.3129e-08	0.0533852	0.217623	0.323067
AIMP2.csv	Acute Lymphoblastic Leukemia	rs118006357	7	5941753	T	C	0.0227154859454413	-0.277579	0.0304089608586004	6.9519e-20	0.0489681	-0.11798	0.611698
AIMP2.csv	Acute Lymphoblastic Leukemia	rs12533439	7	6326270	A	G	0.0826830103924778	-0.144299	0.0145024018219395	2.5168e-23	0.0878987	0.159274	0.358034
AIMP2.csv	Acute Lymphoblastic Leukemia	rs144214505	7	6102499	T	C	0.0388422533844437	0.16048781342562	0.022835163618278	2.0951e-12	0.0356197	0.303757	0.254995
AIMP2.csv	Acute Lymphoblastic Leukemia	rs145975521	7	6287745	G	A	0.0324510874962757	0.234878236665468	0.0251316873351382	9.1197e-21	0.0288605	0.279089	0.337123
AIMP2.csv	Acute Lymphoblastic Leukemia	rs147948265	7	6088903	T	C	0.0361967370826151	0.133933640531476	0.0218492374315203	8.799e-10	0.0481254	0.0912216	0.693635
AIMP2.csv	Acute Lymphoblastic Leukemia	rs148500370	7	5836684	C	T	0.0226286422814631	-0.239125	0.0294626703408815	4.8022e-16	0.00617246	0.531994	0.397152
AIMP2.csv	Acute Lymphoblastic Leukemia	rs150114436	7	6240446	A	G	0.0200107520458754	0.257752795824014	0.0341865345408263	4.7142e-14	0.00635387	-0.96717	0.109054
AIMP2.csv	Acute Lymphoblastic Leukemia	rs2228007	7	6026865	C	T	0.0266334415435965	-0.318948	0.0267538319163098	9.1337e-33	0.049926	0.59115	0.000788261
AIMP2.csv	Acute Lymphoblastic Leukemia	rs28609459	7	6095045	T	C	0.144900732241262	-0.148547	0.0113060533976608	1.9733e-39	0.1547	0.0918428	0.49309
AIMP2.csv	Acute Lymphoblastic Leukemia	rs34865672	7	6120141	T	G	0.108251085669167	-0.264806	0.0130519401401701	1.6215e-91	0.0876572	-0.00619087	0.971352
AIMP2.csv	Acute Lymphoblastic Leukemia	rs3807572	7	5667645	T	C	0.17327570005638	-0.0843297	0.010496469136341	9.4191e-16	0.222037	-0.0400306	0.731481
AIMP2.csv	Acute Lymphoblastic Leukemia	rs41280708	7	5923854	C	G	0.734211505852186	0.0736339407198933	0.00935866048803931	3.6036e-15	0.271076	-0.139357	0.203901
AIMP2.csv	Acute Lymphoblastic Leukemia	rs536932	7	6111172	C	T	0.756436391090978	0.154021109432589	0.00927234747469049	5.8212e-62	0.204953	-0.054544	0.649272
AIMP2.csv	Acute Lymphoblastic Leukemia	rs56179236	7	5920377	A	G	0.146299733209604	0.103548817913783	0.0133934549058738	1.0654e-14	0.166489	-0.0443998	0.734128
AIMP2.csv	Acute Lymphoblastic Leukemia	rs56209753	7	6528090	T	C	0.194042810223111	-0.072916	0.0100643149737304	4.318e-13	0.221818	0.112909	0.333904
AIMP2.csv	Acute Lymphoblastic Leukemia	rs74189692	7	6037723	G	T	0.577353757950372	0.269070622856007	0.00864753426307979	1e-200	0.347594	-0.02111	0.835418
AIMP2.csv	Acute Lymphoblastic Leukemia	rs7795003	7	6334421	T	C	0.749898808185293	-0.0546809	0.0098801818882678	3.123e-08	0.376324	-0.128861	0.199418
AIMP2.csv	Acute Lymphoblastic Leukemia	rs78982412	7	6131156	T	G	0.0261687199151505	0.197308552470209	0.0257505647743117	1.8277e-14	0.0231569	-0.335841	0.293756
AIMP2.csv	Acute Lymphoblastic Leukemia	rs852479	7	5639126	A	C	0.0790258256862973	0.0918915609111816	0.0149101997259746	7.147e-10	0.106097	-0.0720838	0.651396
AK3.csv	Acute Lymphoblastic Leukemia	rs10081695	9	4758209	A	C	0.0530671638397526	-0.723745	0.021271101790606	1e-200	0.108644	-0.146985	0.351953
AK3.csv	Acute Lymphoblastic Leukemia	rs10815027	9	4600160	G	A	0.273441316847683	-0.0914033	0.00972530674511396	5.5294e-21	0.368032	-0.0601834	0.550846
AK3.csv	Acute Lymphoblastic Leukemia	rs10815063	9	4740545	G	A	0.563971061889896	-0.120104	0.0100375470543774	5.3807e-33	0.47657	0.0657048	0.499015
AK3.csv	Acute Lymphoblastic Leukemia	rs10815068	9	4756110	C	G	0.0856237255075805	-0.320324	0.016825778658871	8.2939e-81	0.0694134	-0.217499	0.255442
AK3.csv	Acute Lymphoblastic Leukemia	rs10815107	9	4905287	T	A	0.701956381075629	-0.0589447	0.00953751407918868	6.3939e-10	0.341693	-0.0591991	0.565067
AK3.csv	Acute Lymphoblastic Leukemia	rs10974636	9	4596213	T	G	0.71313302425107	-0.0731467	0.0104381961168545	2.4209e-12	0.283837	0.0286585	0.789683
AK3.csv	Acute Lymphoblastic Leukemia	rs10974724	9	4677454	T	G	0.87942355411338	0.148934695118327	0.0134166940029302	1.246e-28	0.133917	0.16121	0.26277
AK3.csv	Acute Lymphoblastic Leukemia	rs10974826	9	4870476	G	C	0.0624689375692931	-0.16588	0.0180661721061724	4.2394e-20	0.0870183	0.0294116	0.865043
AK3.csv	Acute Lymphoblastic Leukemia	rs113608931	9	4758972	A	G	0.729121670266379	0.201156536348374	0.0100626065555326	6.6759e-89	0.288497	0.0434947	0.687432
AK3.csv	Acute Lymphoblastic Leukemia	rs118161685	9	4685584	C	A	0.0198796690899975	-0.243621	0.0358693665674591	1.1059e-11	0.0428729	0.195177	0.414493
AK3.csv	Acute Lymphoblastic Leukemia	rs12115638	9	4810910	G	A	0.0461904568197535	0.292885503849477	0.0214862488426986	2.6125e-42	0.0376605	-0.193516	0.448793
AK3.csv	Acute Lymphoblastic Leukemia	rs12683352	9	4713506	A	G	0.235333909579466	-0.282824	0.0102186271860546	1.3065e-168	0.211113	-0.243805	0.0419778
AK3.csv	Acute Lymphoblastic Leukemia	rs146299656	9	4555436	G	A	0.0150165436497837	-0.610626	0.09275653743858	4.6043e-11	0.00603188	0.136607	0.828242
AK3.csv	Acute Lymphoblastic Leukemia	rs172447	9	4859106	C	T	0.0380264130033247	0.171235906247363	0.0251230074160952	9.3741e-12	0.0516115	-0.0152904	0.945155
AK3.csv	Acute Lymphoblastic Leukemia	rs1756867	9	4740648	T	C	0.300646756705345	-0.106109	0.010634313514336	1.8988e-23	0.332532	-0.146442	0.166966
AK3.csv	Acute Lymphoblastic Leukemia	rs28659804	9	4776986	C	T	0.3080363970026	0.0945774054771077	0.00947014643954658	1.7411e-23	0.311493	0.163227	0.121036
AK3.csv	Acute Lymphoblastic Leukemia	rs34322951	9	4802065	T	C	0.0203967663014573	-0.238606	0.0364818802104076	6.1273e-11	0.0370203	-0.0212253	0.934038
AK3.csv	Acute Lymphoblastic Leukemia	rs41303235	9	4985388	T	C	0.0434349326722085	0.17886948711899	0.024186914272442	1.412e-13	0.0329611	-0.128453	0.640839
AK3.csv	Acute Lymphoblastic Leukemia	rs463684	9	4717365	A	C	0.0572926453455598	0.359432057186978	0.0186523192503919	9.5936e-83	0.021645	-0.0192225	0.954549
AK3.csv	Acute Lymphoblastic Leukemia	rs62540576	9	4735162	G	A	0.455940419875679	0.0897490758361373	0.0088769943360867	4.9783e-24	0.481124	0.117805	0.227323
AK3.csv	Acute Lymphoblastic Leukemia	rs62541880	9	4673029	T	C	0.0442570926053376	-0.201277	0.0212595447542188	2.8635e-21	0.0200682	-0.184159	0.600051
AK3.csv	Acute Lymphoblastic Leukemia	rs62543482	9	4863984	C	T	0.336728174677741	0.051393221906321	0.00917244724367677	2.1092e-08	0.302973	0.236927	0.0254965
AK3.csv	Acute Lymphoblastic Leukemia	rs7018567	9	4800948	C	T	0.812580231065469	-0.201118	0.0111336096225486	6.1e-73	0.240056	0.00105868	0.992557
AK3.csv	Acute Lymphoblastic Leukemia	rs71496487	9	4662365	A	C	0.0183872130753515	-0.418937	0.0407994384262928	9.7813e-25	0.0308552	-0.0161386	0.953283
AK3.csv	Acute Lymphoblastic Leukemia	rs72694102	9	4661437	T	C	0.0626249308892953	0.173521225374765	0.0190327109109098	7.7375e-20	0.0770785	0.0205757	0.909795
AK3.csv	Acute Lymphoblastic Leukemia	rs76366761	9	4641884	T	C	0.0279336524178907	0.163793735368507	0.0275640299830885	2.8122e-09	0.00651735	0.502916	0.417292
AK3.csv	Acute Lymphoblastic Leukemia	rs80237214	9	4690751	A	G	0.013949433304272	-0.34271	0.0536758678203828	1.7162e-10	0.0101898	-0.317945	0.527504
AK5.csv	Acute Lymphoblastic Leukemia	rs10493604	1	77826732	G	T	0.11658897827231	0.213621752634315	0.0123794920424844	1.0086e-66	0.0951935	-0.298189	0.0743276
AK5.csv	Acute Lymphoblastic Leukemia	rs10873939	1	77884130	C	A	0.708933067759029	-0.130521	0.00874512352866598	2.2596e-50	0.283483	0.206469	0.0559371
AK5.csv	Acute Lymphoblastic Leukemia	rs11162342	1	77897845	A	C	0.869649366755609	-0.114887	0.0117987591167647	2.0883e-22	0.100934	-0.209614	0.192908
AK5.csv	Acute Lymphoblastic Leukemia	rs11162351	1	77944732	G	C	0.34469668495828	0.106596897155857	0.00835883640636869	3.0152e-37	0.410814	-0.091271	0.35702
AK5.csv	Acute Lymphoblastic Leukemia	rs114094692	1	78378403	C	T	0.0198212112702424	-0.298822	0.0311981124248405	9.8751e-22	0.0311159	0.547209	0.0474308
AK5.csv	Acute Lymphoblastic Leukemia	rs114769217	1	77670538	G	A	0.0196954943790387	0.206779163586938	0.0305931592819852	1.3914e-11	0.0380449	-0.204541	0.424797
AK5.csv	Acute Lymphoblastic Leukemia	rs115525402	1	78443047	C	A	0.0725017203150088	0.134344834202973	0.0154293432030151	3.1202e-18	0.0853145	-0.214621	0.213823
AK5.csv	Acute Lymphoblastic Leukemia	rs116069454	1	77995637	T	C	0.0268644914266689	0.419336233436688	0.0256354031090366	3.8396e-60	0.0114065	-0.355701	0.444604
AK5.csv	Acute Lymphoblastic Leukemia	rs116658506	1	77846598	C	T	0.0136792452830189	-0.47039	0.0630744421429274	8.7979e-14	0.0107018	-0.148127	0.753333
AK5.csv	Acute Lymphoblastic Leukemia	rs12034899	1	77903611	G	A	0.0941258268190018	-0.238422	0.0136045290536425	9.2017e-69	0.11322	0.333904	0.0293968
AK5.csv	Acute Lymphoblastic Leukemia	rs142099129	1	77901097	T	G	0.0194772382746107	0.437632209330854	0.0312297752371571	1.2944e-44	0.0349272	-0.0184565	0.945181
AK5.csv	Acute Lymphoblastic Leukemia	rs144503755	1	78520082	A	G	0.0138941043935411	0.343592215470702	0.0592339095043103	6.6157e-09	0.000258865	-1.26729	0.691436
AK5.csv	Acute Lymphoblastic Leukemia	rs149651142	1	77815320	G	A	0.0283543549508392	0.193664422223549	0.0268292727229787	5.2603e-13	0.0447233	-0.0582893	0.805044
AK5.csv	Acute Lymphoblastic Leukemia	rs150686184	1	77547124	G	T	0.0392849111760738	0.183460815115541	0.0220249006705573	8.1116e-17	0.0210489	-0.124193	0.711872
AK5.csv	Acute Lymphoblastic Leukemia	rs1510244	1	78497802	A	T	0.147314182175078	0.11980473986472	0.011229448472623	1.4276e-26	0.194532	0.135135	0.272942
AK5.csv	Acute Lymphoblastic Leukemia	rs17100456	1	77831564	T	C	0.169988674971687	-0.140265	0.0105957109419882	5.294e-40	0.12453	-0.0227182	0.877445
AK5.csv	Acute Lymphoblastic Leukemia	rs17392771	1	78714771	C	T	0.0510271317829457	0.215040736812822	0.0182874875041732	6.3632e-32	0.0609069	-0.27089	0.183689
AK5.csv	Acute Lymphoblastic Leukemia	rs2351034	1	77967830	C	A	0.611240557706039	0.0764914465016414	0.00814926504603959	6.2204e-21	0.317826	-0.0185111	0.859491
AK5.csv	Acute Lymphoblastic Leukemia	rs34140909	1	77960612	A	G	0.649152606348847	-0.120734	0.00833928734220565	1.6737e-47	0.415872	0.0907345	0.356567
AK5.csv	Acute Lymphoblastic Leukemia	rs491408	1	77153592	C	T	0.895494438980101	0.0727598598101439	0.0130216657975059	2.3049e-08	0.0953850000000001	-0.168669	0.306237
AK5.csv	Acute Lymphoblastic Leukemia	rs4949655	1	77897688	C	T	0.15147130670074	0.531398551451893	0.0110806834313074	1e-200	0.164486	-0.0223604	0.866825
AK5.csv	Acute Lymphoblastic Leukemia	rs4949660	1	78025459	C	T	0.384384441087613	0.0619945029069881	0.00818301252732156	3.5692e-14	0.391006	-0.172206	0.0843199
AK5.csv	Acute Lymphoblastic Leukemia	rs59046189	1	77720844	C	T	0.383077910312547	-0.0791	0.00818671424451508	4.3639e-22	0.332291	0.0611653	0.551894
AK5.csv	Acute Lymphoblastic Leukemia	rs60832898	1	78178605	G	A	0.0720808748919538	-0.115443	0.01536030757946	5.6564e-14	0.0588955	0.187991	0.367164
AK5.csv	Acute Lymphoblastic Leukemia	rs68087426	1	77893674	A	G	0.02840593339888	0.29593381931765	0.0252266489913605	8.8617e-32	0.0148741	0.214234	0.593987
AK5.csv	Acute Lymphoblastic Leukemia	rs684657	1	78614180	G	A	0.745828929488147	-0.0873598	0.00914083091490583	1.2099e-21	0.291818	0.110254	0.302289
AK5.csv	Acute Lymphoblastic Leukemia	rs74724999	1	78858731	G	A	0.0288373337410182	0.284916865584084	0.035381092984314	8.1053e-16	0.0350188	0.124982	0.631943
AK5.csv	Acute Lymphoblastic Leukemia	rs7511768	1	77782637	C	G	0.08047408749481	-0.118944	0.0146302400377073	4.2858e-16	0.0732361	-0.093415	0.619537
AK5.csv	Acute Lymphoblastic Leukemia	rs7536818	1	77791392	G	A	0.431286328980146	-0.0820544	0.00803572210806508	1.7667e-24	0.414536	0.0899081	0.359598
AK5.csv	Acute Lymphoblastic Leukemia	rs79633233	1	77693299	T	G	0.0164742871909725	0.288200278794677	0.0330254943270778	2.6291e-18	0.0171816	-0.462197	0.228366
AKAP12.csv	Acute Lymphoblastic Leukemia	rs4869722	6	151567068	A	G	0.376921342402946	0.0578527049126556	0.00822507427280885	2.0127e-12	0.380741	-0.0540426	0.591163
AKAP12.csv	Acute Lymphoblastic Leukemia	rs6903033	6	151606907	A	G	0.0550756765020639	0.119449987415133	0.0175974877966871	1.1386e-11	0.023264	-0.170568	0.603426
AKAP12.csv	Acute Lymphoblastic Leukemia	rs6909101	6	151505950	A	C	0.810063112246873	0.0567706494289461	0.0102905034492724	3.4562e-08	0.148219	-0.19936	0.144524
AKAP12.csv	Acute Lymphoblastic Leukemia	rs72994089	6	151610726	A	G	0.0457866536775451	0.232938758949597	0.019697172243328	2.8647e-32	0.0501437	-0.339183	0.128291
AKAP6.csv	Acute Lymphoblastic Leukemia	rs10143940	14	32752694	G	A	0.66292983052127	-0.0726952	0.0125256665347064	6.4829e-09	0.340498	-0.126367	0.217977
AKAP6.csv	Acute Lymphoblastic Leukemia	rs1278927	14	32414386	C	A	0.616008728426899	-0.120192	0.0121737800768101	5.4401e-23	0.399915	-0.156444	0.114368
AKAP6.csv	Acute Lymphoblastic Leukemia	rs1957014	14	32907086	A	G	0.320789525887721	-0.0806101	0.0126843227477403	2.0816e-10	0.352544	-0.172084	0.0912578
AKAP6.csv	Acute Lymphoblastic Leukemia	rs1958366	14	32671106	T	A	0.754563571143882	0.129892695689568	0.0137582162766593	3.6924e-21	0.25012	0.0566741	0.614889
AKAP6.csv	Acute Lymphoblastic Leukemia	rs7151842	14	32459575	A	G	0.504800634794684	0.0673816810491287	0.0118421232072282	1.2704e-08	0.467033	0.207634	0.0335421
AKAP6.csv	Acute Lymphoblastic Leukemia	rs8017665	14	32681313	C	T	0.207224047430233	-0.171755	0.0146144427376835	6.8479e-32	0.194404	-0.123511	0.314333
AKD1.csv	Acute Lymphoblastic Leukemia	rs112930861	6	110104096	C	T	0.0144598470363289	0.33681378917345	0.052870026241398	1.8829e-10	0.00441886	0.0063591	0.993207
AKD1.csv	Acute Lymphoblastic Leukemia	rs12192279	6	110055313	A	G	0.0910394806371254	-0.330478	0.0151016305158681	3.7064e-106	0.101327	0.12964	0.418615
AKD1.csv	Acute Lymphoblastic Leukemia	rs12215954	6	109651960	G	A	0.0308423215202876	0.307598880845885	0.0293110432183075	9.1852e-26	0.0486536	-0.286302	0.207706
AKD1.csv	Acute Lymphoblastic Leukemia	rs13204927	6	109602790	A	G	0.213536773272201	-0.0836376	0.0105777957559731	2.6367e-15	0.263284	0.0753038	0.497329
AKD1.csv	Acute Lymphoblastic Leukemia	rs13205254	6	109929106	G	A	0.0840635155703649	-0.132549	0.0163442501976961	5.0703e-16	0.102765	0.201479	0.210637
AKD1.csv	Acute Lymphoblastic Leukemia	rs13210272	6	110223989	A	G	0.286557179901537	-0.0535735	0.0095870610359822	2.2944e-08	0.206953	-0.00254158	0.983133
AKD1.csv	Acute Lymphoblastic Leukemia	rs140054664	6	109402201	G	T	0.0219437175779277	0.226452724393771	0.032703115660881	4.3783e-12	0.0390402	-0.529132	0.0363773
AKD1.csv	Acute Lymphoblastic Leukemia	rs141420066	6	109921521	T	C	0.025254708243285	-0.197565	0.0354142276831911	2.4218e-08	0.0497947	0.13919	0.53419
AKD1.csv	Acute Lymphoblastic Leukemia	rs35148383	6	109719175	C	A	0.0180975695051582	0.256834356191548	0.0404967370731379	2.268e-10	0.0109604	0.139767	0.772809
AKD1.csv	Acute Lymphoblastic Leukemia	rs41288550	6	109766773	T	C	0.0371457991686053	-0.137072	0.023090070501741	2.9135e-09	0.0282658	-0.438812	0.137363
AKD1.csv	Acute Lymphoblastic Leukemia	rs55873083	6	110012457	A	G	0.0196784922394679	0.207945315465716	0.0332441232699262	3.9752e-10	0.0168804	-0.727795	0.0576594
AKD1.csv	Acute Lymphoblastic Leukemia	rs61731700	6	109771691	A	G	0.0183189655172414	0.32089403599343	0.0346182680827909	1.872e-20	0.0283465	0.154203	0.597513
AKD1.csv	Acute Lymphoblastic Leukemia	rs72946831	6	110185881	A	C	0.0288004750593824	-0.22411	0.0275356849724918	3.9856e-16	0.0417508	0.363525	0.13892
AKD1.csv	Acute Lymphoblastic Leukemia	rs76385456	6	110146768	G	A	0.0218275488069414	0.312332703627712	0.0301182912217423	3.3881e-25	0.0194061	0.0440309	0.898787
AKD1.csv	Acute Lymphoblastic Leukemia	rs76777696	6	109812041	A	G	0.051076011846002	-0.15198	0.0201830163916734	5.0663e-14	0.0606956	0.287887	0.158329
AKD1.csv	Acute Lymphoblastic Leukemia	rs7757895	6	109886005	C	T	0.756088394467829	0.363220302500161	0.0100943037209593	1e-200	0.217279	-0.287078	0.0148922
AKD1.csv	Acute Lymphoblastic Leukemia	rs9372200	6	109156025	A	G	0.0506278538812785	-0.118682	0.0198957044041825	2.4433e-09	0.0649091	-0.198386	0.308717
AKD1.csv	Acute Lymphoblastic Leukemia	rs9372230	6	110181657	G	A	0.364792658845394	-0.0577219	0.00914044251372282	2.7016e-10	0.352966	0.088587	0.390619
AKD1.csv	Acute Lymphoblastic Leukemia	rs9374080	6	109616420	C	T	0.43023745691306	-0.0637816	0.00883853955717732	5.3382e-13	0.505517	0.0629281	0.517395
AKIP1.csv	Acute Lymphoblastic Leukemia	rs10732514	11	8385651	A	T	0.164962021508611	0.113877215051169	0.0118900772697645	9.9519e-22	0.222308	-0.0194955	0.866747
AKIP1.csv	Acute Lymphoblastic Leukemia	rs10769902	11	8357888	C	T	0.678372925232222	-0.0842009	0.00950810639725555	8.3086e-19	0.266356	0.162287	0.141483
AKIP1.csv	Acute Lymphoblastic Leukemia	rs10840269	11	9628802	G	A	0.301552106430155	-0.111004	0.00961290744444704	7.6088e-31	0.298894	0.148877	0.163144
AKIP1.csv	Acute Lymphoblastic Leukemia	rs10840295	11	9751775	T	C	0.58058912386707	0.0696702259274735	0.00896276046562895	7.6528e-15	0.329146	0.102198	0.324963
AKIP1.csv	Acute Lymphoblastic Leukemia	rs11042037	11	8702229	G	C	0.0443964528705756	-0.175944	0.0216073499386433	3.8624e-16	0.0501034	0.368286	0.0968122
AKIP1.csv	Acute Lymphoblastic Leukemia	rs11042157	11	9052065	T	C	0.0586279380852284	0.369456959241143	0.0189433049402482	1.0312e-84	0.0394838	-0.370244	0.149353
AKIP1.csv	Acute Lymphoblastic Leukemia	rs11042373	11	9486002	T	G	0.131230925737538	-0.0822062	0.0145531209166206	1.6157e-08	0.116409	0.0447446	0.768964
AKIP1.csv	Acute Lymphoblastic Leukemia	rs111540114	11	8493505	T	C	0.0318201658664339	-0.357842	0.0271664741895008	1.2651e-39	0.0328893	0.316125	0.25378
AKIP1.csv	Acute Lymphoblastic Leukemia	rs117531678	11	9019246	T	C	0.0166028595984061	0.41468574692572	0.0489148881094778	2.2989e-17	0.027084	0.165063	0.585382
AKIP1.csv	Acute Lymphoblastic Leukemia	rs117723086	11	9008337	A	G	0.0255879681033613	0.387849002067228	0.0325778436551139	1.112e-32	0.026512	-0.705374	0.0209137
AKIP1.csv	Acute Lymphoblastic Leukemia	rs117757897	11	9038921	T	C	0.0311446014601033	-0.371346	0.027135277790203	1.2446e-42	0.0194436	-0.206212	0.550749
AKIP1.csv	Acute Lymphoblastic Leukemia	rs12226334	11	8414652	C	T	0.117915664461816	0.104821994644229	0.0136795117444542	1.8221e-14	0.143908	-0.226802	0.0987575
AKIP1.csv	Acute Lymphoblastic Leukemia	rs12272501	11	9027379	A	G	0.060651963160446	0.385241567441856	0.0191877259340982	1.1633e-89	0.0725095	-0.0752676	0.689933
AKIP1.csv	Acute Lymphoblastic Leukemia	rs12291138	11	8520036	G	A	0.0501555367026219	-0.207884	0.0209846072761483	3.8968e-23	0.076452	0.114916	0.530595
AKIP1.csv	Acute Lymphoblastic Leukemia	rs12789429	11	9723393	G	A	0.345682041216879	0.0541375502959089	0.00929703255927408	5.7801e-09	0.389633	-0.155333	0.120055
AKIP1.csv	Acute Lymphoblastic Leukemia	rs12790873	11	9021565	A	G	0.0432801305885554	0.450109599378338	0.0239027130608913	4.2233e-79	0.0518728	-0.0524928	0.81322
AKIP1.csv	Acute Lymphoblastic Leukemia	rs12793650	11	8384529	G	C	0.357792683396939	0.124419462628537	0.00932546808389639	1.3223e-40	0.336535	-0.0516948	0.618341
AKIP1.csv	Acute Lymphoblastic Leukemia	rs12801814	11	9299091	T	C	0.256380247659317	-0.103908	0.0101276897936561	1.0693e-24	0.206636	-0.00965312	0.936055
AKIP1.csv	Acute Lymphoblastic Leukemia	rs138506179	11	8919833	G	A	0.0149383191981496	-0.38107	0.0599412406316589	2.0493e-10	0.00352061	0.345566	0.676701
AKIP1.csv	Acute Lymphoblastic Leukemia	rs139964514	11	9344782	T	C	0.0230562448304384	-0.405189	0.0677505441870057	2.2232e-09	0.0162945	0.156058	0.686947
AKIP1.csv	Acute Lymphoblastic Leukemia	rs142032868	11	9115107	T	C	0.0319958129797627	0.253545484994577	0.0346951866491389	2.7196e-13	0.0357711	-0.441098	0.0902589
AKIP1.csv	Acute Lymphoblastic Leukemia	rs146397878	11	8826846	C	T	0.014809189291817	0.583091862352518	0.0479875451491262	5.6807e-34	0.00383759	-0.442822	0.568467
AKIP1.csv	Acute Lymphoblastic Leukemia	rs147116746	11	9265279	G	A	0.023780487804878	-0.256537	0.0346479510886729	1.3194e-13	0.062736	0.0912004	0.656786
AKIP1.csv	Acute Lymphoblastic Leukemia	rs147563288	11	9370281	T	C	0.0212145021887978	-0.297858	0.0377480319159844	3.0026e-15	0.0479029	-0.158888	0.501427
AKIP1.csv	Acute Lymphoblastic Leukemia	rs149984047	11	9073907	T	C	0.017269485481406	0.390168650592085	0.0396807235644416	8.1487e-23	0.0258304	-0.268838	0.39756
AKIP1.csv	Acute Lymphoblastic Leukemia	rs181807710	11	9286729	T	C	0.066006600660066	-0.240312	0.0222707055435258	3.8129e-27	0.0925761	-0.0568522	0.740333
AKIP1.csv	Acute Lymphoblastic Leukemia	rs1835790	11	8893298	A	C	0.0514094504157372	0.147590436872338	0.0207835800307462	1.2368e-12	0.012679	0.208041	0.621999
AKIP1.csv	Acute Lymphoblastic Leukemia	rs185478222	11	8539138	G	A	0.0210897986449089	0.230573847379173	0.0347647680144703	3.3072e-11	0.0122215	-0.156025	0.732938
AKIP1.csv	Acute Lymphoblastic Leukemia	rs1883097	11	8938819	C	T	0.943046766476308	-0.175038	0.0192981309398051	1.188e-19	0.0376332	-0.0799157	0.754597
AKIP1.csv	Acute Lymphoblastic Leukemia	rs189690179	11	9092785	A	G	0.0180143360160966	-0.572847	0.0421570405206131	4.6795e-42	0.0154034	-0.0968239	0.810729
AKIP1.csv	Acute Lymphoblastic Leukemia	rs2247920	11	8986157	G	T	0.0369586098498079	-0.292491	0.0252779282639942	5.767e-31	0.0132157	-0.265746	0.542701
AKIP1.csv	Acute Lymphoblastic Leukemia	rs34028497	11	9130429	A	G	0.0268983711860518	-0.193401	0.0275132095998876	2.0742e-12	0.017873	-0.187369	0.619214
AKIP1.csv	Acute Lymphoblastic Leukemia	rs34522349	11	8854947	G	T	0.0148745519713262	-0.442713	0.0552949142792093	1.1792e-15	0.00882735	0.0721902	0.890815
AKIP1.csv	Acute Lymphoblastic Leukemia	rs35065864	11	9201526	G	A	0.196534577133606	0.163851174244867	0.0112489564149738	4.6353e-48	0.207625	-0.151395	0.209846
AKIP1.csv	Acute Lymphoblastic Leukemia	rs35631772	11	8563227	C	G	0.172511418972481	-0.225115	0.0117034182497606	1.8854e-82	0.131151	0.0357478	0.804688
AKIP1.csv	Acute Lymphoblastic Leukemia	rs3794153	11	8751889	G	C	0.44193709053293	0.475361825856919	0.00897259544495527	1e-200	0.529186	-0.105967	0.275785
AKIP1.csv	Acute Lymphoblastic Leukemia	rs4758057	11	8338161	C	T	0.487710924875042	0.0623513111288671	0.00882600483103788	1.6131e-12	0.599783	-0.0994443	0.317567
AKIP1.csv	Acute Lymphoblastic Leukemia	rs4758348	11	8359880	A	C	0.152617535420347	-0.116693	0.0122676392324104	1.8631e-21	0.100422	-0.0603461	0.711225
AKIP1.csv	Acute Lymphoblastic Leukemia	rs4910043	11	9369732	T	C	0.0886705158108057	0.143685616832608	0.0156590216581053	4.4823e-20	0.0837293	-0.0505495	0.774253
AKIP1.csv	Acute Lymphoblastic Leukemia	rs4910457	11	9371415	A	G	0.218422306959009	-0.14966	0.0109883348504027	3.0457e-42	0.19123	0.0210554	0.865769
AKIP1.csv	Acute Lymphoblastic Leukemia	rs4929937	11	8795126	A	G	0.0188100158016288	-0.420429	0.0417597836501238	7.6518e-24	0.021853	-0.361111	0.283141
AKIP1.csv	Acute Lymphoblastic Leukemia	rs58650381	11	8417574	A	C	0.828162156041218	0.259222796405771	0.0117211054673683	2.2272e-108	0.199897	-0.284581	0.0192212
AKIP1.csv	Acute Lymphoblastic Leukemia	rs61881862	11	8336664	C	G	0.050961406085081	-0.136367	0.0222556524708796	8.9327e-10	0.0503592	0.171145	0.45215
AKIP1.csv	Acute Lymphoblastic Leukemia	rs7106265	11	9078224	T	G	0.678741658722593	-0.35761	0.00951905401640908	1e-200	0.304888	-0.0335623	0.751768
AKIP1.csv	Acute Lymphoblastic Leukemia	rs7114344	11	9379338	A	G	0.20237527804258	0.160885187898053	0.0113002597330992	5.3841e-46	0.234121	-0.0108413	0.925154
AKIP1.csv	Acute Lymphoblastic Leukemia	rs72632953	11	9079681	C	T	0.227798865045661	-0.2546	0.0105186972222724	1.99e-129	0.193789	0.22564	0.0688193
AKIP1.csv	Acute Lymphoblastic Leukemia	rs72852613	11	8405882	C	T	0.0889176267732581	0.263218612975897	0.0158399396401301	5.2146e-62	0.0853577	0.150605	0.388335
AKIP1.csv	Acute Lymphoblastic Leukemia	rs72852776	11	8970258	C	T	0.0424545059803418	-0.332816	0.0224452231643114	9.6567e-50	0.0188876	0.215612	0.546024
AKIP1.csv	Acute Lymphoblastic Leukemia	rs72853712	11	8984690	G	A	0.108632468954063	-0.52018	0.014209455670169	1e-200	0.0900217	0.100028	0.555127
AKIP1.csv	Acute Lymphoblastic Leukemia	rs72854108	11	9520287	C	A	0.0244667097608274	-0.271549	0.0379428325825793	8.2462e-13	0.0140491	0.0227536	0.956808
AKIP1.csv	Acute Lymphoblastic Leukemia	rs7396840	11	9129735	C	T	0.200970030950404	-0.0701901	0.0110339242209265	1.9992e-10	0.21838	0.00694522	0.952304
AKIP1.csv	Acute Lymphoblastic Leukemia	rs7480849	11	8383248	T	C	0.817104261796043	0.104141756921802	0.011485800917812	1.2256e-19	0.20126	-0.0794783	0.508104
AKIP1.csv	Acute Lymphoblastic Leukemia	rs77076958	11	9555740	T	C	0.10555155587553	0.0984693097232324	0.0148292686550454	3.1368e-11	0.110708	0.0754959	0.629786
AKIP1.csv	Acute Lymphoblastic Leukemia	rs77214613	11	9146808	T	C	0.0183810047671434	-0.215423	0.036415554728109	3.3027e-09	0.0146685	-0.0912365	0.817813
AKIP1.csv	Acute Lymphoblastic Leukemia	rs77784346	11	8998278	T	A	0.098844721441058	-0.186987	0.0148673764176057	2.8256e-36	0.0832696	0.365241	0.0160642
AKIP1.csv	Acute Lymphoblastic Leukemia	rs77788182	11	9093191	C	T	0.0182397646481981	-0.207034	0.0370007743774356	2.2011e-08	0.0111798	-0.114935	0.809527
AKIP1.csv	Acute Lymphoblastic Leukemia	rs78125152	11	9622306	G	A	0.019962712018553	-0.245257	0.0348257960707423	1.8896e-12	0.015409	0.176925	0.66642
AKIP1.csv	Acute Lymphoblastic Leukemia	rs78243025	11	9886893	G	C	0.0798731692586441	0.102257656731032	0.016310596983927	3.6244e-10	0.0785734	-0.276584	0.129805
AKIP1.csv	Acute Lymphoblastic Leukemia	rs78671649	11	9024717	C	T	0.0268439411556544	0.433405527740723	0.0318549367716766	3.7193e-42	0.0928354	0.231934	0.171842
AKIP1.csv	Acute Lymphoblastic Leukemia	rs80345945	11	8987926	T	C	0.0297951226970415	-0.25545	0.0261764171288875	1.6881e-22	0.0437622	-0.0651037	0.781727
AKIP1.csv	Acute Lymphoblastic Leukemia	rs871676	11	8738532	G	C	0.705366476942734	-0.208384	0.00982804386996538	8.9219e-100	0.302865	0.101569	0.340458
AKIRIN2.csv	Acute Lymphoblastic Leukemia	rs190817204	6	88089872	A	G	0.0154034657798005	0.472640095425855	0.0759651701156988	4.9148e-10	0.0266343	0.174941	0.564984
AKIRIN2.csv	Acute Lymphoblastic Leukemia	rs4637609	6	88252601	A	G	0.0837267862763613	0.189020747078184	0.0155079949361029	3.5839e-34	0.105096	0.357129	0.0228344
AKIRIN2.csv	Acute Lymphoblastic Leukemia	rs7752494	6	88352125	G	A	0.527664846865683	-0.0550577	0.00808530661078483	9.787e-12	0.465862	-0.0707177	0.468746
AKIRIN2.csv	Acute Lymphoblastic Leukemia	rs78072872	6	87772684	A	G	0.0145588748111124	-0.230841	0.0397405714287603	6.2922e-09	0.00353844	-0.393081	0.623841
AKIRIN2.csv	Acute Lymphoblastic Leukemia	rs9444463	6	87755274	C	T	0.35033217575117	-0.0511916	0.00837066109072888	9.6074e-10	0.350588	-0.21026	0.0399236
AKR1E2.csv	Acute Lymphoblastic Leukemia	rs10751984	10	4799475	A	G	0.725750685858168	0.0598189102247522	0.00890427362678658	1.8449e-11	0.224309	0.0567708	0.627654
AKR1E2.csv	Acute Lymphoblastic Leukemia	rs10904347	10	4843520	T	C	0.0832800932015483	-0.0790203	0.0143772580408045	3.8762e-08	0.0855513	-0.216579	0.216389
AKR1E2.csv	Acute Lymphoblastic Leukemia	rs10904361	10	4915805	G	T	0.227423052350708	0.079701724233961	0.00947713102818833	4.1071e-17	0.208579	0.0641711	0.590677
AKR1E2.csv	Acute Lymphoblastic Leukemia	rs11252770	10	4878972	A	G	0.200158526458821	-0.225833	0.00994639225082715	3.9802e-114	0.209658	0.189158	0.114082
AKR1E2.csv	Acute Lymphoblastic Leukemia	rs116860779	10	4794163	G	A	0.0702290393648418	-0.113576	0.016212631015003	2.4593e-12	0.0810542	0.0615954	0.729745
AKR1E2.csv	Acute Lymphoblastic Leukemia	rs138231664	10	4983714	C	T	0.0122793322925423	-0.243206	0.0435572733583927	2.3559e-08	0.0148252	0.757567	0.0615248
AKR1E2.csv	Acute Lymphoblastic Leukemia	rs150857516	10	4938461	A	G	0.134355995633869	0.0740754796633773	0.0118284199063277	3.791e-10	0.114655	-0.00162043	0.991616
AKR1E2.csv	Acute Lymphoblastic Leukemia	rs1901649	10	4830278	C	T	0.237457251305949	0.1049045752374	0.00933555590298212	2.6835e-29	0.312745	-0.139797	0.185511
AKR1E2.csv	Acute Lymphoblastic Leukemia	rs2904803	10	5003355	T	C	0.60741506760121	-0.0610287	0.00819991777067562	9.8573e-14	0.544259	-0.0180716	0.854121
AKR1E2.csv	Acute Lymphoblastic Leukemia	rs2961562	10	4867313	A	T	0.0998188200656777	0.264920705376324	0.0132767044561098	1.3947e-88	0.077314	-0.248199	0.173829
AKR1E2.csv	Acute Lymphoblastic Leukemia	rs2961579	10	4848757	T	C	0.263663358893399	0.0756814801004817	0.00901646235873115	4.7148e-17	0.34905	-0.250235	0.0141844
AKR1E2.csv	Acute Lymphoblastic Leukemia	rs61830347	10	4953264	G	A	0.06292550861966	0.105758716267088	0.0167586347421186	2.7796e-10	0.0420175	0.0360948	0.883615
AKR1E2.csv	Acute Lymphoblastic Leukemia	rs7081029	10	5333043	T	C	0.226746589499793	-0.0760458	0.00948710475468162	1.0942e-15	0.251518	-0.112988	0.313919
AKR1E2.csv	Acute Lymphoblastic Leukemia	rs74111737	10	4864946	G	A	0.162864552014432	-0.163746	0.0107587224249271	2.6053e-52	0.170333	0.153588	0.234103
AKR1E2.csv	Acute Lymphoblastic Leukemia	rs75432190	10	4992582	T	C	0.040631841171586	0.144327063742973	0.0201571296131301	8.0677e-13	0.0381246	0.116736	0.635679
AKT1.csv	Acute Lymphoblastic Leukemia	rs11624762	14	105312935	T	C	0.12292199488491	0.182097387685081	0.0133535769682385	2.4328e-42	0.180554	-0.119349	0.351945
AKT1.csv	Acute Lymphoblastic Leukemia	rs117538559	14	105419224	A	G	0.0190296211655094	-0.303894	0.0413000586754312	1.8641e-13	0.00970608	-0.356067	0.453545
AKT1.csv	Acute Lymphoblastic Leukemia	rs12432267	14	105249233	C	T	0.0237190407548159	-0.256479	0.0424950081914093	1.5837e-09	0.0085825	0.543936	0.321296
AKT1.csv	Acute Lymphoblastic Leukemia	rs2494735	14	105242966	C	T	0.63496200214857	-0.0491605	0.0085884795141709	1.0404e-08	0.398445	0.0801048	0.422325
AKT1.csv	Acute Lymphoblastic Leukemia	rs2494742	14	105251196	C	G	0.0818273769386379	-0.198836	0.0187439277482192	2.7296e-26	0.0760548	-0.0718634	0.698015
AKT1.csv	Acute Lymphoblastic Leukemia	rs2841283	14	105395429	A	G	0.542764971876034	-0.0541097	0.00951663434490726	1.3005e-08	0.352122	0.102313	0.318025
AKT1.csv	Acute Lymphoblastic Leukemia	rs34050645	14	105315119	T	C	0.0675657079950461	0.0979720690764555	0.0175006375400049	2.1659e-08	0.093564	0.165919	0.314439
AKT1.csv	Acute Lymphoblastic Leukemia	rs45490496	14	105272678	A	T	0.418440498511084	-0.292224	0.00961048051467785	1e-200	0.395647	0.145596	0.147513
AKT1.csv	Acute Lymphoblastic Leukemia	rs55752802	14	105315567	G	T	0.0726666155380014	-0.23682	0.0207995943265416	4.9214e-30	0.0728583	0.200876	0.289147
AKT1.csv	Acute Lymphoblastic Leukemia	rs7157574	14	105171847	A	G	0.255941302791696	0.0687080430711729	0.0120500259687425	1.1855e-08	0.278809	-0.158039	0.144525
AKT1.csv	Acute Lymphoblastic Leukemia	rs72707615	14	105616558	T	C	0.110148047435607	-0.109961	0.0129136194279673	1.663e-17	0.0859482	0.199376	0.244
AKT1.csv	Acute Lymphoblastic Leukemia	rs72709705	14	105667980	A	C	0.0151813736223633	-0.258859	0.0433294131355718	2.3122e-09	0.00807814	0.467111	0.384107
AKT1.csv	Acute Lymphoblastic Leukemia	rs72715988	14	105271352	T	C	0.0784294034946776	0.162358780164077	0.022173497058818	2.443e-13	0.13045	0.110848	0.460531
AKT1.csv	Acute Lymphoblastic Leukemia	rs73345596	14	105175387	T	C	0.137129905085706	-0.116024	0.0152248446998359	2.5211e-14	0.139249	0.131189	0.354546
AKT1.csv	Acute Lymphoblastic Leukemia	rs79405222	14	105214669	A	C	0.0763894069377098	-0.258983	0.0201137994415712	6.1438e-38	0.062956	0.0656433	0.741783
AKTIP.csv	Acute Lymphoblastic Leukemia	rs11075675	16	52992475	C	T	0.305130753937911	-0.0747116	0.0130134624648895	9.4008e-09	0.28401	0.136437	0.204368
AKTIP.csv	Acute Lymphoblastic Leukemia	rs11075994	16	53850079	A	G	0.336635795821667	-0.0896615	0.0125292016057912	8.2944e-13	0.384553	-0.00818898	0.93468
AKTIP.csv	Acute Lymphoblastic Leukemia	rs113885317	16	53664934	T	C	0.0962961414656578	-0.164408	0.0206891522716469	1.9139e-15	0.145466	-0.0783567	0.570198
AKTIP.csv	Acute Lymphoblastic Leukemia	rs11640911	16	53391673	A	G	0.509287925696594	0.203477500788345	0.01319217982173	1.1289e-53	0.454708	0.0241705	0.80536
AKTIP.csv	Acute Lymphoblastic Leukemia	rs11643744	16	53791798	G	A	0.665880265740601	-0.0886658	0.012553385811146	1.6271e-12	0.399497	-0.0430042	0.664183
AKTIP.csv	Acute Lymphoblastic Leukemia	rs117123246	16	53499051	T	C	0.0268895714789264	-0.248723	0.0423422702987814	4.2489e-09	0.0513713	-0.321866	0.147522
AKTIP.csv	Acute Lymphoblastic Leukemia	rs117401437	16	53389685	A	G	0.0151515151515152	0.390881687475799	0.0656734299090709	2.6521e-09	0.0110325	-0.163047	0.72957
AKTIP.csv	Acute Lymphoblastic Leukemia	rs117515728	16	53427421	T	C	0.0233131426961544	-0.435424	0.0437128487964094	2.2533e-23	0.0328556	-0.442533	0.106216
AKTIP.csv	Acute Lymphoblastic Leukemia	rs1362428	16	53423883	A	T	0.243807114266294	-0.246688	0.0137950364222379	1.6172e-71	0.303386	-0.107929	0.307058
AKTIP.csv	Acute Lymphoblastic Leukemia	rs139577774	16	53502295	T	C	0.0180498332352364	-0.377853	0.0619105659374004	1.0397e-09	0.0469484	0.0750637	0.740324
AKTIP.csv	Acute Lymphoblastic Leukemia	rs140043856	16	53486732	T	C	0.0568754034861201	0.295523772057644	0.0263451220476799	3.3497e-29	0.0840029	-0.00388634	0.982328
AKTIP.csv	Acute Lymphoblastic Leukemia	rs140690408	16	53339004	T	C	0.193205419839778	0.205655728298047	0.0176189753862142	1.7638e-31	0.113323	0.180766	0.242214
AKTIP.csv	Acute Lymphoblastic Leukemia	rs143864003	16	53482173	G	A	0.0225555030703826	0.515578168993543	0.0472530628717389	1.0235e-27	0.0199297	0.096034	0.784119
AKTIP.csv	Acute Lymphoblastic Leukemia	rs150565897	16	53520789	G	A	0.018118575433496	0.548170946211911	0.0521531135795478	7.7201e-26	0.0196476	0.299834	0.390173
AKTIP.csv	Acute Lymphoblastic Leukemia	rs151006591	16	53597255	C	T	0.0154757984853474	0.324808653634122	0.0557037649861296	5.5096e-09	0.00254693	-1.03001	0.265736
AKTIP.csv	Acute Lymphoblastic Leukemia	rs16952517	16	53797057	A	G	0.104756468797565	0.108271542044205	0.0193338586889885	2.1435e-08	0.100122	-0.0780751	0.63403
AKTIP.csv	Acute Lymphoblastic Leukemia	rs2388405	16	53867459	T	C	0.406640021115343	0.0850342187045398	0.012090918213616	2.0243e-12	0.249833	0.0226233	0.840139
AKTIP.csv	Acute Lymphoblastic Leukemia	rs28635118	16	53423587	C	T	0.0962328767123288	0.160024331266785	0.0200765718527588	1.5791e-15	0.0702227	0.16074	0.398397
AKTIP.csv	Acute Lymphoblastic Leukemia	rs2908797	16	53429173	T	C	0.453048895601284	0.481814447057277	0.0118978868686944	1e-200	0.356166	0.119479	0.237264
AKTIP.csv	Acute Lymphoblastic Leukemia	rs34969241	16	53376141	C	T	0.154935911850686	-0.169756	0.0192243169521223	1.043e-18	0.189071	-0.0997768	0.427835
AKTIP.csv	Acute Lymphoblastic Leukemia	rs55864849	16	53392775	G	A	0.0592825708729915	0.182861268269154	0.0311853042053915	4.5294e-09	0.0863152	-0.149181	0.400342
AKTIP.csv	Acute Lymphoblastic Leukemia	rs60380613	16	53555390	T	C	0.180042278509683	0.211963853479194	0.0154114059110781	4.8457e-43	0.135011	0.175176	0.218313
AKTIP.csv	Acute Lymphoblastic Leukemia	rs62048371	16	53770081	G	A	0.0224822508545885	0.237095208149282	0.0411559319115559	8.3716e-09	0.00747556	0.272918	0.630686
AKTIP.csv	Acute Lymphoblastic Leukemia	rs62048488	16	53453939	G	T	0.0568829502132639	0.310331105547155	0.0255635363230382	6.5303e-34	0.0237717	0.428351	0.185358
AKTIP.csv	Acute Lymphoblastic Leukemia	rs62050296	16	53123761	A	G	0.0346856688846956	0.271230228738956	0.0380156458910614	9.7069e-13	0.0412306	0.523315	0.00790952
AKTIP.csv	Acute Lymphoblastic Leukemia	rs71390213	16	53626236	A	G	0.0905005462310061	-0.277899	0.0242462716142077	2.0568e-30	0.153429	-0.0862098	0.522269
AKTIP.csv	Acute Lymphoblastic Leukemia	rs72801820	16	53478855	C	T	0.0279488669378268	-0.302402	0.0438900145940477	5.5792e-12	0.0357417	-0.254324	0.340269
AKTIP.csv	Acute Lymphoblastic Leukemia	rs77549649	16	53567931	A	C	0.138130638479111	0.239277325444291	0.0173668746421265	3.4668e-43	0.106281	-0.000400065	0.997991
AKTIP.csv	Acute Lymphoblastic Leukemia	rs80018017	16	53597026	T	G	0.0685015679294855	-0.176198	0.0244572731599807	5.83e-13	0.0985581	0.16139	0.314735
AKTIP.csv	Acute Lymphoblastic Leukemia	rs8052485	16	53376791	G	A	0.498431343936962	0.0845608879027342	0.0131899684764833	1.4476e-10	0.393682	-0.107615	0.282181
AL161915.1.csv	Acute Lymphoblastic Leukemia	rs10788973	1	54657181	C	A	0.0323534416744661	0.395441869413304	0.0539116386384872	2.2172e-13	0.019397	-0.104608	0.758586
AL161915.1.csv	Acute Lymphoblastic Leukemia	rs11206287	1	54600710	T	C	0.243527338340817	0.147183765775162	0.0222325255694937	3.592e-11	0.334448	-0.115774	0.261628
AL161915.1.csv	Acute Lymphoblastic Leukemia	rs12047169	1	54487417	T	C	0.347226980320505	-0.140464	0.0206682666379427	1.0741e-11	0.318613	0.0146929	0.888037
AL161915.1.csv	Acute Lymphoblastic Leukemia	rs12095916	1	54588636	A	G	0.975220285505406	0.444851154297355	0.061323254707253	4.0464e-13	0.0183663	-0.11633	0.746248
AL161915.1.csv	Acute Lymphoblastic Leukemia	rs617067	1	54611295	T	C	0.795351196963433	0.139761657289588	0.0236287438992355	3.3228e-09	0.185413	-0.0335723	0.78689
AL161915.1.csv	Acute Lymphoblastic Leukemia	rs630538	1	54598275	C	T	0.334398135969033	0.121019216342882	0.0202062406236028	2.1088e-09	0.309514	-0.0194865	0.853966
AL161915.1.csv	Acute Lymphoblastic Leukemia	rs72664200	1	54717914	C	T	0.0372712947561936	0.380384082519558	0.0566697082251327	1.9171e-11	0.0615604	-0.153898	0.441416
AL161915.1.csv	Acute Lymphoblastic Leukemia	rs74631198	1	54579848	A	G	0.0482169475977526	-0.637243	0.0445076656504769	1.6989e-46	0.0502798	-0.126748	0.568175
AL161915.1.csv	Acute Lymphoblastic Leukemia	rs74874429	1	54612981	A	T	0.0274289632709039	-0.420114	0.0583977719278768	6.292e-13	0.0197883	-0.442194	0.202678
AL161915.1.csv	Acute Lymphoblastic Leukemia	rs79460780	1	54629073	A	C	0.0405405405405405	0.53215041593974	0.0483619226554951	3.6799e-28	0.0324324	-0.41747	0.132484
AL161915.1.csv	Acute Lymphoblastic Leukemia	rs9919142	1	54579153	G	A	0.0314578396147084	1.19104922080807	0.0546285194406229	2.1921e-105	0.0358536	-0.526982	0.0432335
AL513477.1.csv	Acute Lymphoblastic Leukemia	rs10910073	1	2359862	A	C	0.291693728801328	-0.151903	0.0241279764513719	3.0582e-10	0.291928	0.117668	0.267853
AL513477.1.csv	Acute Lymphoblastic Leukemia	rs12118145	1	2355223	C	T	0.815834386852086	0.186763291559336	0.0282529486202554	3.838e-11	0.162496	-0.115475	0.38324
AL513477.1.csv	Acute Lymphoblastic Leukemia	rs12724614	1	2315414	T	C	0.752508511019531	0.224846711745706	0.0253765870328321	7.9728e-19	0.182662	0.0763674	0.542715
AL513477.1.csv	Acute Lymphoblastic Leukemia	rs144788155	1	2310220	A	C	0.0170719520319787	-0.520412	0.0891864054970604	5.3726e-09	0.00525712	0.892288	0.197914
AL513477.1.csv	Acute Lymphoblastic Leukemia	rs1472318	1	2272226	T	C	0.70162710921565	-0.172539	0.0252503995320514	8.3041e-12	0.227891	0.10259	0.375117
AL513477.1.csv	Acute Lymphoblastic Leukemia	rs2643898	1	2265219	T	C	0.269775274985527	0.157790388166947	0.0260298566731465	1.3461e-09	0.279173	0.00566968	0.958434
AL513477.1.csv	Acute Lymphoblastic Leukemia	rs61760819	1	2311393	G	A	0.237276261073947	-0.415694	0.0260094613748997	1.6895e-57	0.243928	0.233085	0.0393913
AL513477.1.csv	Acute Lymphoblastic Leukemia	rs75236747	1	2353972	C	T	0.0280712245033553	-0.393079	0.0664287587743189	3.2707e-09	0.019121	0.687161	0.00935449
ALDH1A1.csv	Acute Lymphoblastic Leukemia	rs10781087	9	74836785	A	T	0.680777811971072	-0.0545444	0.00861068863184919	2.3796e-10	0.310362	0.143693	0.171424
ALDH1A1.csv	Acute Lymphoblastic Leukemia	rs1079290	9	74931766	A	T	0.544072016855009	0.0646209113980465	0.00804543219597192	9.5896e-16	0.528423	-0.0107832	0.911939
ALDH1A1.csv	Acute Lymphoblastic Leukemia	rs10869090	9	74675343	A	G	0.4774958289683	0.0564994365006591	0.0080653566637154	2.4699e-12	0.430933	-0.0943424	0.334133
ALDH1A1.csv	Acute Lymphoblastic Leukemia	rs11143438	9	75649046	G	A	0.0725909500901984	-0.0868895	0.0153203706162439	1.4147e-08	0.0684177	-0.150998	0.436433
ALDH1A1.csv	Acute Lymphoblastic Leukemia	rs11143504	9	75762282	T	G	0.129775494672755	0.137428158108313	0.0118904089937024	6.7414e-31	0.115881	-0.0394098	0.798163
ALDH1A1.csv	Acute Lymphoblastic Leukemia	rs11143516	9	75790680	C	T	0.210299078030133	-0.0799272	0.0105073313092666	2.8097e-14	0.218504	-0.00550578	0.963075
ALDH1A1.csv	Acute Lymphoblastic Leukemia	rs111478760	9	75741140	G	A	0.0501395419964063	-0.155314	0.018346080950476	2.544e-17	0.0547577	0.0659691	0.756824
ALDH1A1.csv	Acute Lymphoblastic Leukemia	rs116870084	9	76048231	A	G	0.0119625401599563	-0.390384	0.0463821268995215	3.8691e-17	0.00226876	-1.01782	0.303118
ALDH1A1.csv	Acute Lymphoblastic Leukemia	rs117148564	9	76054389	T	G	0.0269270725119468	-0.254546	0.025607739474877	2.7771e-23	0.0178972	0.185689	0.613672
ALDH1A1.csv	Acute Lymphoblastic Leukemia	rs117377468	9	76102968	C	T	0.0190607871216236	-0.324796	0.0325202197794007	1.7271e-23	0.0187043	0.266095	0.475965
ALDH1A1.csv	Acute Lymphoblastic Leukemia	rs11788245	9	75750665	G	A	0.0667388578593412	0.0999663448910577	0.0160010155888048	4.1734e-10	0.0779708	0.247079	0.177301
ALDH1A1.csv	Acute Lymphoblastic Leukemia	rs11794852	9	76118698	A	G	0.250272484684482	0.125754373044892	0.00917687384480439	9.6879e-43	0.262788	-0.0327855	0.767821
ALDH1A1.csv	Acute Lymphoblastic Leukemia	rs12353493	9	76022225	C	T	0.103270991774018	0.102041441737068	0.0132385528791328	1.2801e-14	0.110315	0.0250472	0.871675
ALDH1A1.csv	Acute Lymphoblastic Leukemia	rs12379984	9	75321651	T	G	0.213954102815732	-0.0847006	0.00971059053776298	2.7189e-18	0.215258	-0.0658303	0.582094
ALDH1A1.csv	Acute Lymphoblastic Leukemia	rs13300927	9	75034874	A	G	0.536132296307483	-0.0886844	0.00798641650641991	1.1915e-28	0.456803	0.0951408	0.327218
ALDH1A1.csv	Acute Lymphoblastic Leukemia	rs148523756	9	74945032	T	C	0.0304380888006421	0.138297034442224	0.0242941774307388	1.2512e-08	0.0260549	-0.245242	0.417544
ALDH1A1.csv	Acute Lymphoblastic Leukemia	rs149493631	9	75937844	G	A	0.0267657180313541	0.182529548687333	0.0286514117267072	1.8829e-10	0.0300828	0.0715435	0.802704
ALDH1A1.csv	Acute Lymphoblastic Leukemia	rs17575649	9	75822819	A	G	0.205744696912508	0.150350716884532	0.00985111791044153	1.3657e-52	0.181724	-0.133424	0.289266
ALDH1A1.csv	Acute Lymphoblastic Leukemia	rs17579286	9	74836355	G	A	0.149446068625942	0.0652213783212534	0.0112588476102217	6.9223e-09	0.12364	-0.137508	0.351137
ALDH1A1.csv	Acute Lymphoblastic Leukemia	rs2589622	9	75298165	G	C	0.182157958320749	0.0773549954813589	0.0103184019156652	6.5395e-14	0.230023	-0.208303	0.0707571
ALDH1A1.csv	Acute Lymphoblastic Leukemia	rs276782	9	76237655	A	C	0.162332439678284	-0.0644687	0.0108655653489764	2.9672e-09	0.159024	-0.0205651	0.876543
ALDH1A1.csv	Acute Lymphoblastic Leukemia	rs278733	9	76110042	T	C	0.953430154786929	-0.348937	0.01899813048289	2.4139e-75	0.0583808	-0.221605	0.281693
ALDH1A1.csv	Acute Lymphoblastic Leukemia	rs35460188	9	75229843	A	G	0.0438794879043657	0.237087957049657	0.0199994902485645	2.0369e-32	0.0288568	-0.309144	0.281538
ALDH1A1.csv	Acute Lymphoblastic Leukemia	rs4744653	9	74651012	T	C	0.81741908170727	0.0582458383435581	0.0103926912915618	2.0898e-08	0.283386	-0.204226	0.0589061
ALDH1A1.csv	Acute Lymphoblastic Leukemia	rs62540668	9	76212949	A	G	0.118058475062106	-0.10299	0.0124062127636213	1.0272e-16	0.134123	-0.154994	0.276716
ALDH1A1.csv	Acute Lymphoblastic Leukemia	rs6560318	9	75798847	T	G	0.696220930232558	-0.0723068	0.0086600175003142	6.8495e-17	0.308056	0.175983	0.0952226
ALDH1A1.csv	Acute Lymphoblastic Leukemia	rs67286026	9	76144318	T	G	0.190215544902042	0.102044523911305	0.0101471211565958	8.6089e-24	0.148017	0.0248736	0.8564
ALDH1A1.csv	Acute Lymphoblastic Leukemia	rs72734871	9	75609720	T	C	0.0751330540142679	-0.198153	0.015107118674233	2.6454e-39	0.0880401	0.0992279	0.563036
ALDH1A1.csv	Acute Lymphoblastic Leukemia	rs72737080	9	75840595	A	G	0.0223938826466916	-0.342587	0.0272899475719451	3.7888e-36	0.0269121	0.589417	0.0448931
ALDH1A1.csv	Acute Lymphoblastic Leukemia	rs76755135	9	75570770	A	G	0.0239244741873805	0.280838836054634	0.0287217946649724	1.4023e-22	0.00759212	0.481333	0.381628
ALDH1A1.csv	Acute Lymphoblastic Leukemia	rs76766686	9	74638140	G	A	0.0355353075170843	0.373612276107971	0.0579118138865937	1.1082e-10	0.051642	-0.331307	0.131254
ALDH1A1.csv	Acute Lymphoblastic Leukemia	rs78320984	9	75844302	T	G	0.022504031666911	-0.358199	0.0298568709660006	3.6663e-33	0.0583918	0.17083	0.406206
ALDH1A1.csv	Acute Lymphoblastic Leukemia	rs7858789	9	75617710	A	G	0.311980818607461	0.155156819493689	0.0085967553450291	8.1504e-73	0.269525	-0.0991325	0.364922
ALDH1A1.csv	Acute Lymphoblastic Leukemia	rs7867580	9	75852207	A	G	0.741102634446992	-0.388108	0.00907478448958688	1e-200	0.320179	0.0730451	0.481673
ALDH1A1.csv	Acute Lymphoblastic Leukemia	rs79854818	9	75586403	C	T	0.0276458293748812	-0.238264	0.0424992735005434	2.0658e-08	0.000228573	-1.04189	0.748971
ALDH1A1.csv	Acute Lymphoblastic Leukemia	rs8187896	9	75555531	C	T	0.0240016864422092	0.220592529935912	0.0314073309892237	2.1653e-12	0.0133229	0.308179	0.453238
ALG1L.csv	Acute Lymphoblastic Leukemia	rs10934713	3	125128677	T	C	0.3585628922545	0.149227166361711	0.022383627281711	2.618e-11	0.348761	-0.0635492	0.536677
ALG1L.csv	Acute Lymphoblastic Leukemia	rs10934728	3	125586028	T	C	0.160204774844721	-0.43469	0.0292661604070323	6.6524e-50	0.154408	0.122925	0.3672
ALG1L.csv	Acute Lymphoblastic Leukemia	rs113889208	3	125646488	A	G	0.0634328358208955	-0.587278	0.04404165694216	1.4563e-40	0.145691	-0.00910305	0.9479
ALG1L.csv	Acute Lymphoblastic Leukemia	rs141570567	3	125664523	C	T	0.0636114911080711	0.515931879120012	0.0439839624143233	8.9459e-32	0.0540421	-0.0867714	0.684153
ALG1L.csv	Acute Lymphoblastic Leukemia	rs144372745	3	125694156	A	G	0.041497231884768	-0.543595	0.0538249862526099	5.5581e-24	0.0494974	0.289858	0.204046
ALG1L.csv	Acute Lymphoblastic Leukemia	rs1447658	3	125864409	A	G	0.771753429806427	0.354726726404286	0.0255769504942163	9.7901e-44	0.192835	-0.173609	0.158319
ALG1L.csv	Acute Lymphoblastic Leukemia	rs147785085	3	125639052	T	C	0.0155001210946961	-0.668501	0.0984580597022487	1.1229e-11	0.00330961	1.58661	0.0505976
ALG1L.csv	Acute Lymphoblastic Leukemia	rs182332724	3	125666343	C	T	0.0228999864296377	-0.634697	0.0717634080086289	9.2021e-19	0.0125617	-0.408052	0.361268
ALG1L.csv	Acute Lymphoblastic Leukemia	rs2001911	3	125137292	T	G	0.436936259771497	-0.139437	0.0216422472007005	1.1713e-10	0.41921	-0.131285	0.18523
ALG1L.csv	Acute Lymphoblastic Leukemia	rs34041052	3	125746892	A	G	0.0222275050517057	-0.715651	0.077493389897777	2.578e-20	0.0346847	-0.203564	0.445672
ALG1L.csv	Acute Lymphoblastic Leukemia	rs35342053	3	125861685	T	C	0.1182908606276	-0.45947	0.0332393031278095	1.8467e-43	0.104128	0.00719789	0.96424
ALG1L.csv	Acute Lymphoblastic Leukemia	rs56855990	3	125738803	C	G	0.667132286318333	0.793050856535464	0.0227797189207605	1e-200	0.239582	-0.220754	0.0527485
ALG1L.csv	Acute Lymphoblastic Leukemia	rs60174183	3	125927749	T	G	0.0717238528317487	0.320327025140035	0.0416025332337669	1.3649e-14	0.0676596	0.0771424	0.689214
ALG1L.csv	Acute Lymphoblastic Leukemia	rs62265231	3	125868272	T	G	0.0979107239225966	0.199307715792122	0.036120211637058	3.4327e-08	0.0746526	0.0362994	0.844487
ALG1L.csv	Acute Lymphoblastic Leukemia	rs62266561	3	125757960	T	C	0.0670529176417302	0.529469898307481	0.0429193199237606	5.7821e-35	0.0554628	-0.18283	0.384262
ALG1L.csv	Acute Lymphoblastic Leukemia	rs6784346	3	125392975	G	A	0.295319634703196	-0.213383	0.0235314088939678	1.21e-19	0.439401	0.119213	0.224474
ALG1L.csv	Acute Lymphoblastic Leukemia	rs73196267	3	125689148	T	C	0.0358576398180359	0.338226604615678	0.0577336140611221	4.6791e-09	0.029161	-0.375922	0.190888
ALG1L.csv	Acute Lymphoblastic Leukemia	rs75934172	3	125953705	G	A	0.27747791952895	-0.19101	0.0239745464758125	1.6231e-15	0.305921	0.114159	0.278178
ALG1L.csv	Acute Lymphoblastic Leukemia	rs7623244	3	125455621	C	A	0.172606287959986	0.182074967646421	0.0284057174399234	1.459e-10	0.133173	-0.381251	0.0106223
ALG1L.csv	Acute Lymphoblastic Leukemia	rs7647098	3	125739695	G	A	0.332647591725804	-0.517675	0.022783496228401	2.7404e-114	0.349896	0.154936	0.127356
ALG1L.csv	Acute Lymphoblastic Leukemia	rs77991249	3	125382909	G	A	0.0505981092031642	0.508804368058983	0.0489776549125459	2.8001e-25	0.0461607	-0.0238661	0.919126
ALG1L10P.csv	Acute Lymphoblastic Leukemia	rs12322269	12	8525952	A	G	0.648279352226721	0.188172939568742	0.0276464709051396	1.0021e-11	0.433293	-0.173015	0.0849239
ALG1L10P.csv	Acute Lymphoblastic Leukemia	rs181650959	12	8347547	T	C	0.0161764705882353	0.796201949462475	0.123315978914982	1.0708e-10	0.0148214	0.133417	0.743574
ALG1L10P.csv	Acute Lymphoblastic Leukemia	rs2970164	12	8383433	A	G	0.0805669526296158	0.508959171133555	0.053502561930615	1.856e-21	0.098643	-0.188311	0.275184
ALG1L10P.csv	Acute Lymphoblastic Leukemia	rs35731850	12	8391761	C	T	0.605719410123555	0.412660430416365	0.0328423171228076	3.2971e-36	0.356055	-0.0791658	0.450326
ALG1L10P.csv	Acute Lymphoblastic Leukemia	rs4883090	12	8384850	G	A	0.0795547266581187	0.797817573848203	0.0422179310519962	1.1981e-79	0.096953	-0.370549	0.0321078
ALG1L10P.csv	Acute Lymphoblastic Leukemia	rs61922366	12	8612928	G	T	0.0817638491286224	0.328288332379699	0.0416937606212628	3.4458e-15	0.0675015	-0.436943	0.0260351
ALG1L6P.csv	Acute Lymphoblastic Leukemia	rs116321223	3	75420157	G	A	0.0437467997951869	-0.933688	0.0558559356427094	9.9889e-63	0.0784474	0.13741	0.455003
ALG1L6P.csv	Acute Lymphoblastic Leukemia	rs1489094	3	76118958	T	C	0.0204672762962608	-0.554463	0.0806843724333619	6.3219e-12	0.021483	0.756649	0.0250086
ALG1L6P.csv	Acute Lymphoblastic Leukemia	rs4515077	3	75423166	G	C	0.291666666666667	-0.241296	0.0400477520404119	1.6869e-09	0.44728	0.032324	0.749371
ALG1L6P.csv	Acute Lymphoblastic Leukemia	rs6767960	3	75394787	C	A	0.175633528265107	-0.224914	0.0272342013122537	1.4739e-16	0.186525	0.0743971	0.555202
ALG1L6P.csv	Acute Lymphoblastic Leukemia	rs7431376	3	75857835	T	C	0.82826741618149	0.178000502229838	0.0274768457642304	9.2823e-11	0.236185	-0.0864789	0.44847
ALG1L6P.csv	Acute Lymphoblastic Leukemia	rs77991024	3	75372665	A	C	0.0893141945773525	-0.246236	0.0363357383479738	1.2287e-11	0.124624	0.285541	0.0524457
ALG1L6P.csv	Acute Lymphoblastic Leukemia	rs78224551	3	76158880	A	G	0.0258336764100453	-0.497078	0.0653234107485929	2.7495e-14	0.0341988	0.0611894	0.822146
ALG8.csv	Acute Lymphoblastic Leukemia	rs11237385	11	77811893	C	T	0.0776549775635699	-0.118188	0.015476990661548	2.2338e-14	0.0955607	0.139753	0.397757
ALG8.csv	Acute Lymphoblastic Leukemia	rs11237414	11	77855357	A	G	0.759945648071261	-0.0749273	0.00931769588441001	8.8818e-16	0.173768	0.0875989	0.494266
ALG8.csv	Acute Lymphoblastic Leukemia	rs113390502	11	77833837	A	C	0.0179155553318907	0.202655023182105	0.0337516485155814	1.9228e-09	0.0164368	0.190307	0.62516
ALG8.csv	Acute Lymphoblastic Leukemia	rs150774871	11	77733287	T	C	0.0207449961245612	0.285134630819271	0.0301879909393319	3.5473e-21	0.00753013	-0.375699	0.517788
ALG8.csv	Acute Lymphoblastic Leukemia	rs230660	11	77886785	A	T	0.558542459793334	-0.0741167	0.00811180041829988	6.4209e-20	0.487053	0.200081	0.0402133
ALG8.csv	Acute Lymphoblastic Leukemia	rs550458	11	77855254	T	C	0.149573452591229	0.208183941409485	0.0111383109021275	5.8824e-78	0.120917	-0.196622	0.186579
ALKBH8.csv	Acute Lymphoblastic Leukemia	rs10749888	11	107127162	C	T	0.221128189710248	-0.104859	0.00957216005388806	6.3017e-28	0.233367	-0.0155669	0.891328
ALKBH8.csv	Acute Lymphoblastic Leukemia	rs11212045	11	107020991	C	T	0.26615296803653	0.0499368569824887	0.00903572847365265	3.2687e-08	0.231337	0.036047	0.753555
ALKBH8.csv	Acute Lymphoblastic Leukemia	rs11530514	11	107029182	C	T	0.114497716894977	-0.0759795	0.0125411783352376	1.3731e-09	0.166188	0.149038	0.256707
ALKBH8.csv	Acute Lymphoblastic Leukemia	rs12271035	11	107134434	G	A	0.0790020005284415	0.117640437826522	0.0147541121512181	1.5462e-15	0.073571	0.0392039	0.832307
ALKBH8.csv	Acute Lymphoblastic Leukemia	rs12281043	11	107329902	A	T	0.205121914395712	0.113652850931251	0.00985594558607372	9.1854e-31	0.217625	0.0380836	0.748437
ALKBH8.csv	Acute Lymphoblastic Leukemia	rs12795977	11	107464259	T	C	0.04297656187505	0.111476760829944	0.0201043771447535	2.9429e-08	0.0473248	-0.0647418	0.780322
ALKBH8.csv	Acute Lymphoblastic Leukemia	rs17667248	11	107348277	C	T	0.131117143294082	0.0854694569636418	0.0118544580318232	5.6034e-13	0.111994	-0.185334	0.231815
ALKBH8.csv	Acute Lymphoblastic Leukemia	rs589517	11	107404598	T	C	0.559428549860346	-0.197504	0.00801630257223785	4.9734e-134	0.439321	0.17501	0.0740611
ALKBH8.csv	Acute Lymphoblastic Leukemia	rs639556	11	107391278	T	A	0.0524895247442528	-0.190651	0.0178462468464306	1.2226e-26	0.046382	0.0339022	0.88369
ALKBH8.csv	Acute Lymphoblastic Leukemia	rs7109825	11	107363263	G	T	0.924264733642919	-0.146536	0.0150437280748796	2.0196e-22	0.099616	0.17087	0.291971
ALKBH8.csv	Acute Lymphoblastic Leukemia	rs79718024	11	107440345	G	A	0.130548356575754	0.0874045761792877	0.0122439380521794	9.4424e-13	0.155397	-0.259404	0.0549516
AMACR.csv	Acute Lymphoblastic Leukemia	rs10521011	5	33895956	C	T	0.0637309292649098	0.168380882786245	0.0177138615959272	1.989e-21	0.0800816	-0.248636	0.174406
AMACR.csv	Acute Lymphoblastic Leukemia	rs111539422	5	34026825	A	G	0.0304404642939503	-0.149457	0.0233421476367305	1.5235e-10	0.0152353	0.587976	0.136626
AMACR.csv	Acute Lymphoblastic Leukemia	rs115828027	5	33885529	A	G	0.0320611929367727	0.18381805185681	0.0233097112386423	3.1253e-15	0.0281724	-0.0791777	0.789873
AMACR.csv	Acute Lymphoblastic Leukemia	rs12519294	5	33890051	G	A	0.613604354611549	0.0503118516102641	0.00820226146664668	8.5804e-10	0.40176	0.0557653	0.576178
AMACR.csv	Acute Lymphoblastic Leukemia	rs13169378	5	34514974	C	T	0.156529618303319	0.122733	0.0109539199492168	3.8797e-29	0.15651	-0.316787	0.0190292
AMACR.csv	Acute Lymphoblastic Leukemia	rs138830896	5	34115488	C	T	0.0150597341410062	0.503948394610901	0.0553120837022172	8.1777e-20	0.0172414	-0.155703	0.686803
AMACR.csv	Acute Lymphoblastic Leukemia	rs143114266	5	34012629	T	C	0.0558109262498475	-0.15914	0.0178864837133599	5.717e-19	0.0629345	-0.320988	0.107574
AMACR.csv	Acute Lymphoblastic Leukemia	rs16892096	5	33994182	C	T	0.0374548932655102	-0.187953	0.0222255521068798	2.7481e-17	0.0253788	0.124699	0.693435
AMACR.csv	Acute Lymphoblastic Leukemia	rs17516914	5	34582559	G	T	0.0233593585144545	0.199355774955544	0.0276005170991629	5.0928e-13	0.0377693	-0.340883	0.194174
AMACR.csv	Acute Lymphoblastic Leukemia	rs194126	5	34014022	A	G	0.354613409845968	-0.199745	0.00831971249342311	2.2504e-127	0.293119	0.187465	0.0784368
AMACR.csv	Acute Lymphoblastic Leukemia	rs28515711	5	34320218	C	T	0.49625414500348	-0.0558377	0.00823382166371184	1.1885e-11	0.567997	-0.129822	0.18563
AMACR.csv	Acute Lymphoblastic Leukemia	rs299601	5	34026870	C	A	0.0287594876660342	0.492858763033717	0.0285642365445172	1.0405e-66	0.00847125	-0.766681	0.137721
AMACR.csv	Acute Lymphoblastic Leukemia	rs34685	5	34006203	A	G	0.128490360404374	0.433751287920918	0.0118711728525466	1e-200	0.150591	-0.221012	0.10279
AMACR.csv	Acute Lymphoblastic Leukemia	rs4703375	5	34491999	A	C	0.179221287419292	-0.0690994	0.0105342510778075	5.3952e-11	0.181071	0.183086	0.147096
AMACR.csv	Acute Lymphoblastic Leukemia	rs58048147	5	34053820	C	T	0.0288633684118597	0.164772851184335	0.0252509962890145	6.7911e-11	0.00931116	-0.148371	0.767904
AMACR.csv	Acute Lymphoblastic Leukemia	rs59134524	5	33686874	C	A	0.202183825293976	-0.0689257	0.0101518015928172	1.1244e-11	0.20394	0.00283832	0.981349
AMACR.csv	Acute Lymphoblastic Leukemia	rs62366987	5	34118057	C	T	0.0488118901337188	-0.200324	0.0198937534849426	7.5131e-24	0.0483568	0.1841	0.431397
AMACR.csv	Acute Lymphoblastic Leukemia	rs6451022	5	33795056	C	A	0.442017817539375	-0.0573486	0.00799974366870242	7.5658e-13	0.504933	-0.040014	0.680152
AMACR.csv	Acute Lymphoblastic Leukemia	rs966855	5	33699777	G	A	0.87147205832613	0.0962584631596678	0.0118696930994954	5.0787e-16	0.106897	0.35861	0.0218756
AMIGO2.csv	Acute Lymphoblastic Leukemia	rs10748462	12	47505609	A	G	0.651305448829899	0.0523198033966708	0.00887061992788708	3.6793e-09	0.344595	-0.0176381	0.862978
AMIGO2.csv	Acute Lymphoblastic Leukemia	rs11183802	12	47607299	A	G	0.905669636116563	0.0856203754757475	0.013616255383303	3.2158e-10	0.0853233	0.125206	0.46956
AMIGO2.csv	Acute Lymphoblastic Leukemia	rs12301925	12	47473342	C	T	0.328230578354648	-0.165035	0.00851572105262735	1.1341e-83	0.309688	-0.204925	0.0517845
AMIGO2.csv	Acute Lymphoblastic Leukemia	rs12369357	12	47488239	G	A	0.272374429223744	0.0958861565517156	0.00897004158731062	1.1386e-26	0.323532	0.128671	0.217592
AMIGO2.csv	Acute Lymphoblastic Leukemia	rs2079027	12	47727838	A	G	0.0852479070300853	-0.0918952	0.0143277379790087	1.4194e-10	0.0862626	-0.41026	0.0177423
AMIGO2.csv	Acute Lymphoblastic Leukemia	rs215379	12	47754636	T	C	0.529952438471992	0.0904959076220674	0.00797405079145526	7.536e-30	0.494415	0.160486	0.0993871
AMIGO2.csv	Acute Lymphoblastic Leukemia	rs2465229	12	47330018	A	C	0.364101305956066	0.0461537562621404	0.00827083781555479	2.4024e-08	0.306346	-0.0213093	0.840141
AMIGO2.csv	Acute Lymphoblastic Leukemia	rs4768144	12	47609058	C	T	0.301355381885453	-0.0886775	0.00867431341020774	1.561e-24	0.323996	-0.0431836	0.677635
AMIGO2.csv	Acute Lymphoblastic Leukemia	rs61927458	12	47294410	A	G	0.102587724685747	-0.115976	0.0135689116544208	1.2589e-17	0.169859	-0.0528515	0.684605
AMIGO2.csv	Acute Lymphoblastic Leukemia	rs71445733	12	47487620	G	A	0.89116695221778	0.101346114568352	0.0128255374743229	2.749e-15	0.0810197	0.239594	0.17428
AMIGO2.csv	Acute Lymphoblastic Leukemia	rs73093150	12	47463206	G	A	0.0786432787430377	-0.144006	0.0153903213434837	8.2033e-21	0.0758765	-0.360117	0.0521855
AMIGO2.csv	Acute Lymphoblastic Leukemia	rs7315480	12	47005736	A	T	0.427629287828661	-0.0521678	0.00853432883200937	9.7898e-10	0.46733	-0.198286	0.0414457
AMIGO2.csv	Acute Lymphoblastic Leukemia	rs7958193	12	47298154	T	C	0.053241094633848	0.102639785703506	0.0178194072401921	8.4114e-09	0.0346374	0.144832	0.584392
AMIGO2.csv	Acute Lymphoblastic Leukemia	rs854897	12	47488722	T	C	0.133775579042051	-0.0752214	0.0125695728876992	2.1692e-09	0.143258	-0.187009	0.185792
AMIGO2.csv	Acute Lymphoblastic Leukemia	rs952968	12	47548076	C	A	0.634722222222222	0.0654690813217442	0.008293314246123	2.9265e-15	0.368044	-0.016796	0.867397
ANGPTL6.csv	Acute Lymphoblastic Leukemia	rs10432313	19	10157666	G	A	0.0448362414477147	-0.126433	0.0217407347198086	6.0417e-09	0.0485119	0.25718	0.252721
ANGPTL6.csv	Acute Lymphoblastic Leukemia	rs112917725	19	10232339	T	C	0.10845063609539	0.105651937222212	0.0158159215015063	2.3894e-11	0.083772	0.011198	0.949728
ANGPTL6.csv	Acute Lymphoblastic Leukemia	rs146457388	19	10291972	G	A	0.0285326795680976	-0.396081	0.030674482252966	3.8218e-38	0.0576802	-0.200571	0.335166
ANGPTL6.csv	Acute Lymphoblastic Leukemia	rs2305795	19	10226052	G	A	0.441901092994087	-0.191315	0.0095297360380221	1.2013e-89	0.410646	-0.16855	0.087692
ANGPTL6.csv	Acute Lymphoblastic Leukemia	rs56125113	19	10263057	A	G	0.0559372156505914	-0.157783	0.0207548833462445	2.9114e-14	0.0570598	-0.339437	0.107788
ANGPTL6.csv	Acute Lymphoblastic Leukemia	rs60553752	19	10237185	G	A	0.096617915904936	0.197358992335171	0.0161806801835807	3.217e-34	0.0820527	0.248392	0.160435
ANGPTL6.csv	Acute Lymphoblastic Leukemia	rs79016212	19	10630821	C	T	0.0181420081326243	-0.316594	0.046850763206468	1.403e-11	0.0254029	-0.60115	0.056443
ANGPTL6.csv	Acute Lymphoblastic Leukemia	rs79803848	19	10181912	A	G	0.0280349673356206	-0.161337	0.0293666534092676	3.9293e-08	0.0440372	-0.316075	0.182927
ANGPTL6.csv	Acute Lymphoblastic Leukemia	rs8106674	19	10324244	T	C	0.592158586939899	0.0586798466256441	0.00889681706374615	4.2354e-11	0.489098	0.0396684	0.684618
ANK1.csv	Acute Lymphoblastic Leukemia	rs10092989	8	41665510	T	G	0.128082191780822	0.066351945369409	0.0119494922054872	2.8145e-08	0.0947077	-0.223091	0.180178
ANK1.csv	Acute Lymphoblastic Leukemia	rs11774972	8	41624105	T	C	0.359381490012461	0.0779737073233569	0.00829569301153882	5.4979e-21	0.313253	-0.255787	0.0150224
ANK1.csv	Acute Lymphoblastic Leukemia	rs4736805	8	41231323	A	G	0.104832951257093	0.0728851416599315	0.0129677327034839	1.9052e-08	0.110428	-0.15718	0.31289
ANK1.csv	Acute Lymphoblastic Leukemia	rs4736819	8	41509915	C	T	0.543505341436714	-0.169189	0.00799015984702416	1.6307e-99	0.427774	0.142389	0.147026
ANK1.csv	Acute Lymphoblastic Leukemia	rs474059	8	41521469	C	G	0.420582795455403	-0.0638708	0.00806194857036978	2.3259e-15	0.326212	0.0230311	0.823633
ANK1.csv	Acute Lymphoblastic Leukemia	rs523316	8	41610863	T	C	0.866040086060469	-0.109068	0.0116843630060141	1.0137e-20	0.132932	0.293992	0.0392347
ANK1.csv	Acute Lymphoblastic Leukemia	rs62509771	8	41437239	G	C	0.113594322171467	-0.12777	0.0125427974197974	2.2712e-24	0.0664769	0.311831	0.112625
ANK1.csv	Acute Lymphoblastic Leukemia	rs76421049	8	41510024	A	G	0.0651555772199204	0.143327602454154	0.0166269462952315	6.6837e-18	0.110109	-0.0714377	0.646936
ANK1.csv	Acute Lymphoblastic Leukemia	rs78040661	8	41569975	G	A	0.0568354531637469	-0.129259	0.0176102023799618	2.1327e-13	0.0461687	0.0408908	0.860677
ANK1.csv	Acute Lymphoblastic Leukemia	rs9785172	8	41631481	C	A	0.0301369863013699	-0.169536	0.0233575071507841	3.917e-13	0.0198174	0.613805	0.0849044
ANK1.csv	Acute Lymphoblastic Leukemia	rs9801981	8	41492437	C	T	0.39599139395312	0.0760484345689004	0.00813761297859891	9.1716e-21	0.466016	-0.0564733	0.561711
ANKMY2.csv	Acute Lymphoblastic Leukemia	rs113750843	7	16658999	A	G	0.120708175087275	0.157993073726374	0.0122992008069855	9.1043e-38	0.0888665	-0.0659443	0.702273
ANKMY2.csv	Acute Lymphoblastic Leukemia	rs11540037	7	16655387	T	C	0.192621544327931	-0.166996	0.01013495500562	5.3506e-61	0.194225	0.177084	0.153081
ANKMY2.csv	Acute Lymphoblastic Leukemia	rs11772758	7	17079154	A	G	0.239824871284152	-0.0564546	0.00930381490387601	1.2951e-09	0.254593	-0.0886254	0.427893
ANKMY2.csv	Acute Lymphoblastic Leukemia	rs17381374	7	16606751	G	A	0.0510087769292146	-0.107175	0.0181387820363215	3.4461e-09	0.0333987	0.15406	0.567005
ANKMY2.csv	Acute Lymphoblastic Leukemia	rs17620110	7	16687542	T	C	0.11764351181862	0.0779917770977972	0.0139151757596698	2.085e-08	0.0947522	-0.0357952	0.832207
ANKMY2.csv	Acute Lymphoblastic Leukemia	rs523615	7	16641749	C	A	0.648389642602127	0.0612890972244858	0.00831986224642111	1.753e-13	0.355395	-0.249513	0.0140068
ANKMY2.csv	Acute Lymphoblastic Leukemia	rs6976932	7	16681319	C	G	0.7931793884969	0.0596052890826192	0.0103486794594543	8.4313e-09	0.154886	-0.0979058	0.463394
ANKMY2.csv	Acute Lymphoblastic Leukemia	rs79761891	7	16687458	G	A	0.0589809258055885	-0.209619	0.0169825260401547	5.2875e-35	0.0509149	0.183228	0.402185
ANKMY2.csv	Acute Lymphoblastic Leukemia	rs80218505	7	16470464	T	C	0.0151332449053419	-0.256751	0.0449737811844653	1.1364e-08	0.00852976	-0.230004	0.654724
ANKMY2.csv	Acute Lymphoblastic Leukemia	rs818500	7	16723122	A	G	0.636722420597632	-0.0638326	0.00826034234536582	1.0942e-14	0.371824	0.153047	0.127465
ANKRA2.csv	Acute Lymphoblastic Leukemia	rs10036311	5	72723275	G	A	0.0173108744537316	-0.290771	0.0321535547772335	1.5187e-19	0.0156937	-0.00902597	0.981446
ANKRA2.csv	Acute Lymphoblastic Leukemia	rs112448956	5	72602728	T	C	0.0438987120716001	-0.202705	0.0207133575280872	1.288e-22	0.048904	0.570759	0.0114905
ANKRA2.csv	Acute Lymphoblastic Leukemia	rs114249941	5	72961519	G	T	0.0135609444798979	-0.353076	0.0463519193408396	2.5884e-14	0.00857095	0.349705	0.502562
ANKRA2.csv	Acute Lymphoblastic Leukemia	rs11960117	5	72880791	C	T	0.0503034447388666	0.146653719196811	0.0192448846775512	2.5328e-14	0.0519796	0.221762	0.308663
ANKRA2.csv	Acute Lymphoblastic Leukemia	rs13174665	5	72828033	A	G	0.0623274882286085	0.0986601334054045	0.0170306284036879	6.914e-09	0.0897401	0.0501092	0.769572
ANKRA2.csv	Acute Lymphoblastic Leukemia	rs142892719	5	72984731	A	G	0.0291142928494131	-0.260127	0.0247455211452817	7.5902e-26	0.016054	-0.0113284	0.976333
ANKRA2.csv	Acute Lymphoblastic Leukemia	rs144386112	5	72893708	C	T	0.0283508498767354	-0.326871	0.0254687627193098	1.0549e-37	0.0470375	0.149589	0.515026
ANKRA2.csv	Acute Lymphoblastic Leukemia	rs151234367	5	72834889	C	T	0.0363232204797499	0.13853787350713	0.0237470428884846	5.4179e-09	0.0319839	0.100289	0.72719
ANKRA2.csv	Acute Lymphoblastic Leukemia	rs17552288	5	72986000	A	G	0.0739015435632229	-0.211709	0.0155554910689653	3.4924e-42	0.0599277	0.415173	0.0428105
ANKRA2.csv	Acute Lymphoblastic Leukemia	rs2927704	5	73206306	C	T	0.437792100105533	0.0498181091671642	0.00804426112823578	5.903e-10	0.45143	-0.102388	0.29269
ANKRA2.csv	Acute Lymphoblastic Leukemia	rs2972193	5	72617139	A	G	0.421392433738579	-0.0491625	0.00808819455424407	1.2139e-09	0.422217	0.249727	0.00694784
ANKRA2.csv	Acute Lymphoblastic Leukemia	rs4704097	5	73069581	A	G	0.462931857224661	0.0873721154352288	0.00804709285986118	1.8391e-27	0.454224	-0.0322134	0.742496
ANKRA2.csv	Acute Lymphoblastic Leukemia	rs6452980	5	72689768	A	G	0.0655042412818096	-0.151465	0.0164119890952929	2.7317e-20	0.050284	0.120027	0.596403
ANKRA2.csv	Acute Lymphoblastic Leukemia	rs6453024	5	73114755	T	A	0.256492526045599	-0.073124	0.00914461496800817	1.279e-15	0.282433	-0.0598758	0.578091
ANKRA2.csv	Acute Lymphoblastic Leukemia	rs6898104	5	72991374	G	C	0.32479519800672	0.0821990195795755	0.00852793081914508	5.4932e-22	0.302076	0.0992969	0.349152
ANKRA2.csv	Acute Lymphoblastic Leukemia	rs7722653	5	72818878	G	A	0.114144912093767	0.0694154916932764	0.012601523408056	3.6211e-08	0.125384	0.053827	0.716861
ANKRA2.csv	Acute Lymphoblastic Leukemia	rs78702330	5	73037778	G	A	0.0330841892883346	-0.248125	0.0242090115226299	1.1908e-24	0.0429236	0.317816	0.185974
ANKRA2.csv	Acute Lymphoblastic Leukemia	rs79516295	5	72826522	C	T	0.0783344920051644	0.143022811992415	0.0166441070630065	8.4875e-18	0.138279	-0.149689	0.292143
ANKRA2.csv	Acute Lymphoblastic Leukemia	rs80124227	5	72949258	A	G	0.028018622133003	-0.247408	0.0254823229842392	2.7603e-22	0.0341181	-0.0364637	0.89272
ANKRA2.csv	Acute Lymphoblastic Leukemia	rs80341292	5	72708535	T	C	0.207687189723118	0.0764300355226768	0.0111592985140425	7.4472e-12	0.247038	0.250639	0.0270975
ANKRA2.csv	Acute Lymphoblastic Leukemia	rs819545	5	72826421	A	G	0.537766362252664	-0.105024	0.00803694756437391	5.0432e-39	0.476877	0.17224	0.0774801
ANKRA2.csv	Acute Lymphoblastic Leukemia	rs819558	5	72821208	G	T	0.564537353836899	-0.104298	0.00804077024448313	1.7775e-38	0.428981	0.235154	0.0170306
ANKRA2.csv	Acute Lymphoblastic Leukemia	rs819566	5	72762107	T	C	0.243620715687755	-0.122629	0.00930290381374513	1.1169e-39	0.280862	0.140795	0.190735
ANKRA2.csv	Acute Lymphoblastic Leukemia	rs819597	5	72838671	G	A	0.227723709622449	-0.364251	0.00953552204889522	1e-200	0.247922	0.27131	0.0159005
ANKRD10-IT1.csv	Acute Lymphoblastic Leukemia	rs118022676	13	111509690	C	T	0.0522889114954222	0.337272436441887	0.0428663493189993	3.6036e-15	0.0945215	-0.10943	0.513017
ANKRD10-IT1.csv	Acute Lymphoblastic Leukemia	rs67298778	13	111608726	A	G	0.292732115677321	0.118781819658328	0.0209506525430944	1.4313e-08	0.328999	-0.100923	0.335495
ANKRD10-IT1.csv	Acute Lymphoblastic Leukemia	rs67357970	13	111549458	G	T	0.114586085840474	-0.170043	0.0299367071356908	1.3454e-08	0.0830128	-0.0188175	0.914903
ANKRD10-IT1.csv	Acute Lymphoblastic Leukemia	rs77678355	13	111544378	A	G	0.879873775506253	-0.258976	0.0302665405840087	1.1625e-17	0.117735	0.33509	0.0254836
ANKRD10-IT1.csv	Acute Lymphoblastic Leukemia	rs9521984	13	111549982	C	G	0.317656827961048	0.338074413581157	0.0204759559549602	3.0781e-61	0.327707	-0.125556	0.224424
ANKRD10.csv	Acute Lymphoblastic Leukemia	rs113409052	13	111986090	G	T	0.119951988229372	0.0972697566542233	0.0124234953259114	4.902e-15	0.143858	0.133959	0.339293
ANKRD10.csv	Acute Lymphoblastic Leukemia	rs113641136	13	111596594	T	C	0.0540201005025126	0.323603226937176	0.0179600967336469	1.4125e-72	0.0815688	0.151176	0.398359
ANKRD10.csv	Acute Lymphoblastic Leukemia	rs11616301	13	111601705	T	C	0.735555555555556	-0.160345	0.00904626190047443	2.6891e-70	0.269108	0.09182	0.401123
ANKRD10.csv	Acute Lymphoblastic Leukemia	rs117014700	13	111597834	T	G	0.0201551401054604	0.291028344904588	0.0301736990704697	5.1611e-22	0.0218929	-0.481376	0.149886
ANKRD10.csv	Acute Lymphoblastic Leukemia	rs117282809	13	111555228	T	C	0.0506811420220262	-0.286884	0.0208002833115698	2.8318e-43	0.0874195	0.26252	0.126716
ANKRD10.csv	Acute Lymphoblastic Leukemia	rs117646778	13	112042937	T	C	0.0323648621533769	0.128248851259076	0.0231542095468551	3.0455e-08	0.0160386	-0.56215	0.155041
ANKRD10.csv	Acute Lymphoblastic Leukemia	rs1178819	13	112042322	C	G	0.27847543049139	0.0564783501725773	0.00931632386595472	1.3427e-09	0.231028	-0.0356077	0.758857
ANKRD10.csv	Acute Lymphoblastic Leukemia	rs143165581	13	111640656	C	T	0.0300157047506871	-0.139833	0.0237949619059933	4.1878e-09	0.0364101	-0.457902	0.0748859
ANKRD10.csv	Acute Lymphoblastic Leukemia	rs146096254	13	111480641	A	G	0.0170446859358795	-0.307291	0.0332228076049632	2.2533e-20	0.0100298	-0.475255	0.350471
ANKRD10.csv	Acute Lymphoblastic Leukemia	rs148019937	13	111541293	C	T	0.0175931323194319	-0.26482	0.0349140759961598	3.3249e-14	0.0145203	-0.183791	0.65788
ANKRD10.csv	Acute Lymphoblastic Leukemia	rs2247943	13	111969851	T	C	0.199969934984404	0.129373722426852	0.00996554659314379	1.5479e-38	0.225371	-0.22518	0.0529078
ANKRD10.csv	Acute Lymphoblastic Leukemia	rs3783095	13	111642891	C	T	0.520952884324977	-0.142299	0.00799438055345961	7.0669e-71	0.479074	0.0980628	0.313287
ANKRD10.csv	Acute Lymphoblastic Leukemia	rs61969871	13	111621325	A	G	0.0242478390957447	-0.153729	0.0270297504886278	1.2884e-08	0.0326618	0.173692	0.528382
ANKRD10.csv	Acute Lymphoblastic Leukemia	rs61971309	13	111525230	T	C	0.0261701869876015	0.308072132294072	0.0257355152408858	5.0661e-33	0.0289488	0.0181646	0.950611
ANKRD10.csv	Acute Lymphoblastic Leukemia	rs71440092	13	111622269	T	G	0.0472891807479779	-0.176619	0.0192868160047706	5.3064e-20	0.0211901	-0.296345	0.37647
ANKRD10.csv	Acute Lymphoblastic Leukemia	rs72668159	13	111722117	A	G	0.25604968099966	0.0747482516315159	0.0091502327863283	3.1096e-16	0.246526	0.0923039	0.410959
ANKRD10.csv	Acute Lymphoblastic Leukemia	rs7330975	13	111807304	C	T	0.357658334899455	-0.0632371	0.00831662292877758	2.8756e-14	0.381151	-0.0236049	0.813307
ANKRD10.csv	Acute Lymphoblastic Leukemia	rs7336291	13	111330522	T	C	0.026531321354115	0.152534698904933	0.0278236290002066	4.2007e-08	0.0114024	0.11461	0.793666
ANKRD10.csv	Acute Lymphoblastic Leukemia	rs737140	13	111450748	G	A	0.453843226788432	-0.122131	0.00804835517745036	5.1936e-52	0.386994	0.0517696	0.605889
ANKRD10.csv	Acute Lymphoblastic Leukemia	rs75124294	13	111585079	G	A	0.0483815361041946	-0.172793	0.0187271285210843	2.7832e-20	0.0307458	-0.00787126	0.977805
ANKRD10.csv	Acute Lymphoblastic Leukemia	rs75343180	13	111665159	T	C	0.0149452747374854	-0.250987	0.0383655498807903	6.0702e-11	0.0177242	-0.304408	0.425168
ANKRD10.csv	Acute Lymphoblastic Leukemia	rs77220412	13	111560664	A	C	0.880067371355558	-0.234515	0.0124243613320294	1.8106e-79	0.117613	0.335268	0.0254542
ANKRD10.csv	Acute Lymphoblastic Leukemia	rs77267222	13	111480794	T	C	0.0867719606868332	-0.173461	0.0142644422449871	5.0387e-34	0.101796	0.301692	0.0609495
ANKRD10.csv	Acute Lymphoblastic Leukemia	rs78547976	13	111667907	C	T	0.0426178970171638	0.180049733033238	0.0206044279311131	2.3644e-18	0.0949402	0.0384317	0.816556
ANKRD10.csv	Acute Lymphoblastic Leukemia	rs79119110	13	111511442	A	G	0.0346192893401015	0.128956779836003	0.0225252017180792	1.0343e-08	0.0313692	0.260023	0.355325
ANKRD10.csv	Acute Lymphoblastic Leukemia	rs7999064	13	111963037	A	G	0.15919214798037	0.0870043801428672	0.0109156625778319	1.5816e-15	0.160764	0.0518353	0.696535
ANKRD10.csv	Acute Lymphoblastic Leukemia	rs9515299	13	111485569	T	C	0.245199010568923	0.0729019544675589	0.00998520126935474	2.8564e-13	0.27989	0.151267	0.164771
ANKRD10.csv	Acute Lymphoblastic Leukemia	rs9521969	13	111514747	G	C	0.0418485523385301	0.203854795827345	0.0213677552935804	1.4256e-21	0.00999799999999995	-0.0980296	0.842323
ANKRD10.csv	Acute Lymphoblastic Leukemia	rs9521994	13	111577798	G	A	0.230393965481901	0.13392523988712	0.00981799013893028	2.2966e-42	0.205413	-0.0308226	0.801271
ANKRD10.csv	Acute Lymphoblastic Leukemia	rs9555739	13	111523068	G	T	0.274809308088435	0.363115689009534	0.00904188292648363	1e-200	0.29423	-0.129467	0.226642
ANKRD10.csv	Acute Lymphoblastic Leukemia	rs9555767	13	111718343	C	T	0.106091923785185	-0.135043	0.0129434198240242	1.7453e-25	0.0815751	0.0980421	0.578292
ANKRD10.csv	Acute Lymphoblastic Leukemia	rs9559900	13	111527329	A	G	0.160979367883047	0.133005320115985	0.0108458901523244	1.431e-34	0.177504	-0.0571345	0.652346
ANKRD10.csv	Acute Lymphoblastic Leukemia	rs9588290	13	111527756	C	T	0.127487875848691	-0.126911	0.0121129184659764	1.0972e-25	0.124358	-0.0272621	0.853232
ANKRD10.csv	Acute Lymphoblastic Leukemia	rs9634597	13	111492003	C	T	0.0718741779097298	0.249717760586729	0.0154328721261938	6.8893e-59	0.112879	-0.0466491	0.762407
ANKRD18A.csv	Acute Lymphoblastic Leukemia	rs10119139	9	38631449	A	G	0.0637677687270404	0.130631105693834	0.0188169608616626	3.8659e-12	0.0496807	0.189708	0.389939
ANKRD18A.csv	Acute Lymphoblastic Leukemia	rs10973905	9	38558757	C	T	0.268454980245373	0.0862822602400345	0.0147344957546423	4.7472e-09	0.318024	0.0743804	0.494614
ANKRD18A.csv	Acute Lymphoblastic Leukemia	rs12353253	9	38614551	C	G	0.143018980848153	0.154840237750299	0.013616997278214	5.8316e-30	0.1519	0.31975	0.00785742
ANKRD18A.csv	Acute Lymphoblastic Leukemia	rs1815549	9	38621344	A	G	0.29703326649185	-0.104169	0.0110405079114284	3.8951e-21	0.344951	-0.0780009	0.451576
ANKRD18A.csv	Acute Lymphoblastic Leukemia	rs2890814	9	38570739	G	T	0.0960188175818003	0.115280965240552	0.0194226109850308	2.9349e-09	0.119371	0.11825	0.444516
ANKRD26.csv	Acute Lymphoblastic Leukemia	rs11015190	10	26893887	T	C	0.40612537267201	0.0457558144559575	0.00819057254331188	2.3182e-08	0.420959	0.144062	0.148082
ANKRD26.csv	Acute Lymphoblastic Leukemia	rs11015568	10	27431805	T	C	0.22801258643462	-0.0553378	0.00960075313208407	8.2143e-09	0.266645	0.275689	0.0127973
ANKRD26.csv	Acute Lymphoblastic Leukemia	rs118034223	10	28303612	A	G	0.0337169685889978	-0.190459	0.0328022114503988	6.383e-09	0.0356406	0.509513	0.0503918
ANKRD26.csv	Acute Lymphoblastic Leukemia	rs118183234	10	26965158	A	G	0.0189795793217637	0.272446103595065	0.035438760581059	1.4992e-14	0.0176609	0.229479	0.544371
ANKRD26.csv	Acute Lymphoblastic Leukemia	rs1252880	10	27570130	C	T	0.0637406025204175	0.164705189642849	0.0188562061687559	2.4409e-18	0.029054	-0.0513048	0.863231
ANKRD26.csv	Acute Lymphoblastic Leukemia	rs144610740	10	26975803	A	G	0.035733769776323	0.161566249830151	0.0239783689270037	1.608e-11	0.0472706	-0.282114	0.217958
ANKRD26.csv	Acute Lymphoblastic Leukemia	rs148684004	10	27747454	A	G	0.0220827937301835	0.266160957220711	0.029033101414858	4.8456e-20	0.0384238	-0.273209	0.287963
ANKRD26.csv	Acute Lymphoblastic Leukemia	rs2147438	10	27017022	T	C	0.276389308366053	-0.0494271	0.00889985144239007	2.7953e-08	0.22973	0.0364469	0.751161
ANKRD26.csv	Acute Lymphoblastic Leukemia	rs2297144	10	27349367	C	A	0.0688761340492501	-0.284131	0.0379935437424135	7.5233e-14	0.0491308	-0.0217709	0.923714
ANKRD26.csv	Acute Lymphoblastic Leukemia	rs2505955	10	27185423	G	A	0.231992659428047	0.0763455758263483	0.00947921229530026	8.0262e-16	0.301091	0.141117	0.185812
ANKRD26.csv	Acute Lymphoblastic Leukemia	rs2780686	10	27577568	G	A	0.182078961274251	-0.10009	0.0103126200290451	2.8483e-22	0.139406	0.145708	0.298638
ANKRD26.csv	Acute Lymphoblastic Leukemia	rs34921812	10	27582062	C	T	0.194006190080773	0.119601403782143	0.0100642390297837	1.4403e-32	0.228089	-0.134822	0.24496
ANKRD26.csv	Acute Lymphoblastic Leukemia	rs502416	10	27541024	A	C	0.238161981968331	-0.0705528	0.00935725344422112	4.6997e-14	0.249075	-0.0245289	0.827886
ANKRD26.csv	Acute Lymphoblastic Leukemia	rs56325123	10	27382237	A	G	0.0324773413897281	0.146173400687896	0.0237352278457247	7.3484e-10	0.0327244	-0.47373	0.0793889
ANKRD26.csv	Acute Lymphoblastic Leukemia	rs72629732	10	27114543	T	C	0.909283498524627	-0.0775816	0.0138699498465465	2.2241e-08	0.126214	-0.0780043	0.593763
ANKRD26.csv	Acute Lymphoblastic Leukemia	rs73598041	10	27475275	C	T	0.050828666992371	0.603974329686225	0.0180858253711263	1e-200	0.0562195	-0.399206	0.0598053
ANKRD26.csv	Acute Lymphoblastic Leukemia	rs77728719	10	28235976	A	G	0.0267044354057718	0.149926623616115	0.027344901075384	4.1912e-08	0.0210002	0.181683	0.594051
ANKRD34B.csv	Acute Lymphoblastic Leukemia	rs10037587	5	79601531	C	G	0.131130828771002	0.104696315554348	0.0117919847221801	6.7829e-19	0.153308	-0.194221	0.148001
ANKRD34B.csv	Acute Lymphoblastic Leukemia	rs10045551	5	79662689	T	C	0.173111782477341	0.145007025513498	0.0105211737805823	3.2618e-43	0.221456	-0.204117	0.0813317
ANKRD34B.csv	Acute Lymphoblastic Leukemia	rs10053576	5	79835455	T	C	0.240173683216915	-0.0622973	0.0093174405422835	2.2904e-11	0.292199	-0.195186	0.0682857
ANKRD34B.csv	Acute Lymphoblastic Leukemia	rs10057542	5	79423347	T	C	0.0811755421098125	-0.091516	0.01454575028531	3.1421e-10	0.0554768	-0.311826	0.143009
ANKRD34B.csv	Acute Lymphoblastic Leukemia	rs10058312	5	80410466	C	T	0.019367970454927	-0.294351	0.0301799451882844	1.7874e-22	0.0133557	0.497002	0.253824
ANKRD34B.csv	Acute Lymphoblastic Leukemia	rs10078915	5	79264844	G	A	0.0146193453475542	-0.289282	0.0402831833758346	6.9102e-13	0.00770868	0.238538	0.672044
ANKRD34B.csv	Acute Lymphoblastic Leukemia	rs1020721	5	80472887	A	G	0.153369160810252	0.09728787783246	0.0110242470546363	1.0966e-18	0.191131	-0.157492	0.210525
ANKRD34B.csv	Acute Lymphoblastic Leukemia	rs111632480	5	79494483	T	C	0.0353432470971685	-0.202052	0.0222511697624327	1.0798e-19	0.0578243	-0.0426616	0.83727
ANKRD34B.csv	Acute Lymphoblastic Leukemia	rs111872364	5	80457839	T	C	0.0292978448703943	-0.180106	0.0264065646647189	9.0661e-12	0.029007	0.639458	0.0285187
ANKRD34B.csv	Acute Lymphoblastic Leukemia	rs114160651	5	80411340	A	G	0.0345342316536894	-0.181078	0.0224095026301976	6.4555e-16	0.0281313	-0.0776304	0.793157
ANKRD34B.csv	Acute Lymphoblastic Leukemia	rs114209224	5	79629038	T	G	0.0176613885505481	0.232352532591519	0.0397809431227776	5.1951e-09	0.00483871	0.746971	0.306567
ANKRD34B.csv	Acute Lymphoblastic Leukemia	rs114540968	5	80178415	G	A	0.0124861572535991	-0.598596	0.041866268468279	2.2584e-46	0.00625225	-0.113654	0.867065
ANKRD34B.csv	Acute Lymphoblastic Leukemia	rs116466855	5	80048023	T	C	0.0567003792667509	0.228229699611996	0.0180149578583773	8.8051e-37	0.0403969	-0.0542951	0.829064
ANKRD34B.csv	Acute Lymphoblastic Leukemia	rs11746033	5	80448084	A	G	0.0382609991061674	0.169976845856409	0.0232148548677814	2.4467e-13	0.0313118	-0.393989	0.173945
ANKRD34B.csv	Acute Lymphoblastic Leukemia	rs11746517	5	79590807	G	T	0.326261791123304	-0.187652	0.00847298237475223	1.1101e-108	0.355821	0.141675	0.162191
ANKRD34B.csv	Acute Lymphoblastic Leukemia	rs11956958	5	79611566	A	G	0.0442225118846803	-0.311498	0.0194846740159306	1.5794e-57	0.0203728	-0.553764	0.113742
ANKRD34B.csv	Acute Lymphoblastic Leukemia	rs11958942	5	79877781	G	A	0.0312704649639817	-0.431496	0.0249792328454844	7.3332e-67	0.0149779	0.635337	0.120401
ANKRD34B.csv	Acute Lymphoblastic Leukemia	rs11960254	5	79514022	T	C	0.283888909767372	-0.106275	0.00881050062996529	1.6685e-33	0.270126	0.0467745	0.668932
ANKRD34B.csv	Acute Lymphoblastic Leukemia	rs11960365	5	79650724	T	G	0.149007145394971	0.0900465480046337	0.0113877743356941	2.6324e-15	0.126737	0.0173077	0.906709
ANKRD34B.csv	Acute Lymphoblastic Leukemia	rs12697911	5	79959013	C	T	0.0378042465044019	0.184071578173868	0.0220595590012186	7.1698e-17	0.0364724	-0.314135	0.222761
ANKRD34B.csv	Acute Lymphoblastic Leukemia	rs13180605	5	79543299	A	G	0.185910017362422	0.12035150821842	0.0102297963601948	5.9267e-32	0.192099	0.0558692	0.652873
ANKRD34B.csv	Acute Lymphoblastic Leukemia	rs144323474	5	79671584	A	G	0.0175690388993368	-0.219543	0.0338503259782047	8.8262e-11	0.0266999	0.397773	0.198951
ANKRD34B.csv	Acute Lymphoblastic Leukemia	rs145872714	5	79743414	A	G	0.0147695840509368	-0.356598	0.0376531654396984	2.7771e-21	0.016182	0.225714	0.56528
ANKRD34B.csv	Acute Lymphoblastic Leukemia	rs147670804	5	79948318	A	G	0.0185272459499264	0.24566281450567	0.0353131246863699	3.4858e-12	0.0104354	0.584117	0.223686
ANKRD34B.csv	Acute Lymphoblastic Leukemia	rs149339847	5	79913873	A	G	0.0253791613842325	-0.53907	0.0276857943402738	1.927e-84	0.00727541	0.530739	0.340259
ANKRD34B.csv	Acute Lymphoblastic Leukemia	rs1677631	5	79927651	A	G	0.0172525252525253	-0.548179	0.0314447011713573	4.6187e-68	0.0160653	-0.272323	0.484781
ANKRD34B.csv	Acute Lymphoblastic Leukemia	rs173441	5	79893519	A	G	0.509439244860411	-0.0737185	0.00815596107538358	1.5869e-19	0.510057	0.0467402	0.631199
ANKRD34B.csv	Acute Lymphoblastic Leukemia	rs173596	5	80431783	C	T	0.687386741165811	-0.0630763	0.00858601399800651	2.0331e-13	0.264333	-0.0187942	0.864803
ANKRD34B.csv	Acute Lymphoblastic Leukemia	rs173949	5	79407789	T	G	0.853951683865291	0.065026233123265	0.0115452360711015	1.7793e-08	0.126549	0.281544	0.055874
ANKRD34B.csv	Acute Lymphoblastic Leukemia	rs182483508	5	80220503	G	T	0.0179615333125084	-0.415203	0.0321150851924362	3.0961e-38	0.0244796	-0.177485	0.56806
ANKRD34B.csv	Acute Lymphoblastic Leukemia	rs190838868	5	80265360	C	A	0.0213307333777228	-0.345132	0.0302925309336579	4.5104e-30	0.0211073	0.126991	0.709648
ANKRD34B.csv	Acute Lymphoblastic Leukemia	rs2247450	5	79381796	C	T	0.533737156877779	-0.0561303	0.00802997371809786	2.7449e-12	0.470402	0.038422	0.693502
ANKRD34B.csv	Acute Lymphoblastic Leukemia	rs2431221	5	79934230	T	G	0.347104786350596	-0.509662	0.00836019299905652	1e-200	0.302426	0.0638623	0.545243
ANKRD34B.csv	Acute Lymphoblastic Leukemia	rs2434300	5	79378528	A	G	0.0611865784279577	0.132630100327378	0.0167799117328195	2.7009e-15	0.04471	-0.104846	0.657335
ANKRD34B.csv	Acute Lymphoblastic Leukemia	rs245013	5	80047076	C	A	0.588391845979615	0.283817017515669	0.00808736041066022	1e-200	0.474485	-0.29215	0.00160513
ANKRD34B.csv	Acute Lymphoblastic Leukemia	rs245102	5	79956397	T	C	0.0549442093112736	0.153395421073364	0.0176059569448465	2.9698e-18	0.069559	0.0810854	0.676025
ANKRD34B.csv	Acute Lymphoblastic Leukemia	rs249005	5	79785691	C	A	0.0989702067447528	-0.307068	0.0135547736218122	1.274e-113	0.091965	-0.0510451	0.758951
ANKRD34B.csv	Acute Lymphoblastic Leukemia	rs249011	5	79809658	T	A	0.467061294634333	-0.157775	0.00801613356177836	3.0641e-86	0.469956	0.12447	0.200868
ANKRD34B.csv	Acute Lymphoblastic Leukemia	rs249218	5	79857337	T	G	0.396663017628629	-0.3169	0.00813550276351941	1e-200	0.314336	0.245556	0.0192053
ANKRD34B.csv	Acute Lymphoblastic Leukemia	rs252585	5	80372278	A	C	0.233562315996075	0.0790187679449507	0.00940621233289496	4.442e-17	0.268272	-0.0452386	0.679268
ANKRD34B.csv	Acute Lymphoblastic Leukemia	rs26903	5	80362119	T	C	0.177327220113495	-0.111433	0.0104007278598217	8.7309e-27	0.118598	0.0336505	0.822968
ANKRD34B.csv	Acute Lymphoblastic Leukemia	rs390292	5	79415586	C	G	0.233339626203511	0.0694488949682164	0.00941067440421371	1.5853e-13	0.323116	-0.166842	0.109006
ANKRD34B.csv	Acute Lymphoblastic Leukemia	rs41547521	5	79965707	T	C	0.0285253417098226	0.219031085339653	0.0251026984825512	2.6524e-18	0.0239731	0.165904	0.614418
ANKRD34B.csv	Acute Lymphoblastic Leukemia	rs434130	5	80279422	T	G	0.289673400037757	-0.129341	0.00877471778265276	3.5468e-49	0.32005	-0.301606	0.00326272
ANKRD34B.csv	Acute Lymphoblastic Leukemia	rs454184	5	79417673	T	C	0.156436391090978	-0.071886	0.0109560572522974	5.3305e-11	0.200764	0.117667	0.335342
ANKRD34B.csv	Acute Lymphoblastic Leukemia	rs4703815	5	79958580	G	A	0.0705631463727636	0.223456720674582	0.0155401668144195	6.9898e-47	0.0712337	0.0748246	0.688973
ANKRD34B.csv	Acute Lymphoblastic Leukemia	rs527116	5	80301154	G	A	0.510606575321783	0.0613489218175018	0.00796139554848319	1.3003e-14	0.569129	-0.0823796	0.401594
ANKRD34B.csv	Acute Lymphoblastic Leukemia	rs557090	5	80250771	T	A	0.166435175999048	0.145278812688376	0.0109108315137232	1.8937e-40	0.187051	0.14076	0.263646
ANKRD34B.csv	Acute Lymphoblastic Leukemia	rs59089298	5	79464536	A	G	0.0493081568687409	-0.215277	0.0184786855437147	2.2892e-31	0.0356342	-0.389871	0.135127
ANKRD34B.csv	Acute Lymphoblastic Leukemia	rs6151617	5	79961643	G	A	0.419925266097984	0.314364991790476	0.00806355610080763	1e-200	0.431808	0.142059	0.146727
ANKRD34B.csv	Acute Lymphoblastic Leukemia	rs6151650	5	79971294	A	G	0.0517199267250153	0.2996540256095	0.0185459310043385	1.0072e-58	0.0457069	-0.174805	0.454367
ANKRD34B.csv	Acute Lymphoblastic Leukemia	rs6151862	5	80096656	C	T	0.0139542176230793	-0.537488	0.0451435664481566	1.0961e-32	0.00733668	0.179393	0.746753
ANKRD34B.csv	Acute Lymphoblastic Leukemia	rs62366953	5	80085401	A	G	0.0339496459480724	0.199120677476525	0.0223590412186181	5.3194e-19	0.0264167	-0.285905	0.353752
ANKRD34B.csv	Acute Lymphoblastic Leukemia	rs6864713	5	80201284	A	G	0.167518508775226	-0.248176	0.0106376649507685	2.1999e-120	0.149466	0.0107536	0.937479
ANKRD34B.csv	Acute Lymphoblastic Leukemia	rs6886552	5	79590674	T	C	0.145984441354429	0.114827828495326	0.0112506812944285	1.8601e-24	0.0816558	0.150902	0.393209
ANKRD34B.csv	Acute Lymphoblastic Leukemia	rs6897314	5	80307453	G	A	0.466992526609798	0.0756463338474671	0.00797687846375349	2.4708e-21	0.500523	0.149157	0.12417
ANKRD34B.csv	Acute Lymphoblastic Leukemia	rs72765554	5	79933927	T	C	0.0398755656108597	0.314174554214991	0.0209248823939013	5.9094e-51	0.0619948	-0.353221	0.0782186
ANKRD34B.csv	Acute Lymphoblastic Leukemia	rs72769300	5	80375872	C	A	0.08202476219236	-0.0842784	0.0145037522921173	6.2101e-09	0.0569643	-0.0566245	0.788361
ANKRD34B.csv	Acute Lymphoblastic Leukemia	rs72771167	5	80605681	T	C	0.0259342116165382	-0.143993	0.026029525580072	3.166e-08	0.0169444	-0.603501	0.11709
ANKRD34B.csv	Acute Lymphoblastic Leukemia	rs73125972	5	79447630	T	C	0.0818493150684931	-0.0865303	0.0145668984818438	2.8433e-09	0.0503256	-0.308007	0.166791
ANKRD34B.csv	Acute Lymphoblastic Leukemia	rs73129765	5	79529001	A	T	0.279573343401926	-0.0802758	0.00886898127324125	1.4115e-19	0.259097	0.0109532	0.921114
ANKRD34B.csv	Acute Lymphoblastic Leukemia	rs73139507	5	80195836	A	G	0.0787703408621143	-0.459455	0.0147468642220879	1e-200	0.0761185	0.275654	0.136078
ANKRD34B.csv	Acute Lymphoblastic Leukemia	rs75119252	5	80107937	T	C	0.0141921942931388	0.220304417268218	0.0377440407874551	5.3277e-09	0.028235	0.0688485	0.815835
ANKRD34B.csv	Acute Lymphoblastic Leukemia	rs75171718	5	79990131	G	T	0.0567030550537972	0.170542039740782	0.0174950799898217	1.8814e-22	0.0504392	0.437759	0.0469224
ANKRD34B.csv	Acute Lymphoblastic Leukemia	rs75829363	5	80014470	G	T	0.0294180941723336	0.201030155445147	0.0248713509483282	6.3296e-16	0.0472975	-0.116889	0.611612
ANKRD34B.csv	Acute Lymphoblastic Leukemia	rs7703816	5	80459446	T	C	0.128227291517907	-0.0726818	0.0118815508463732	9.5114e-10	0.0920282	-0.321188	0.0573456
ANKRD34B.csv	Acute Lymphoblastic Leukemia	rs7717830	5	80278998	T	G	0.0270296605214951	-0.271001	0.0248725031014607	1.2097e-27	0.0190638	0.909489	0.0114467
ANKRD34B.csv	Acute Lymphoblastic Leukemia	rs7732543	5	79255413	T	C	0.256689091048085	-0.0711374	0.00915928101996836	8.0494e-15	0.271841	0.0462955	0.672294
ANKRD34B.csv	Acute Lymphoblastic Leukemia	rs78621558	5	80012735	A	G	0.028971028971029	-0.543222	0.024714277341025	4.455e-107	0.0484143	0.117662	0.607887
ANKRD34B.csv	Acute Lymphoblastic Leukemia	rs79363758	5	80278710	T	C	0.0877394196582177	0.0802237161216578	0.0141425678486836	1.4081e-08	0.0838318	0.0883222	0.616267
ANKRD34B.csv	Acute Lymphoblastic Leukemia	rs9293802	5	79475070	A	G	0.0853331733461323	-0.114834	0.0145941004769992	3.5863e-15	0.0433687	-0.179244	0.460376
ANKRD36.csv	Acute Lymphoblastic Leukemia	rs115086514	2	97808825	T	C	0.05174954835029	-0.123073	0.0221222771328313	2.6457e-08	0.0287722	-0.0145866	0.960065
ANKRD36.csv	Acute Lymphoblastic Leukemia	rs116469288	2	98746768	T	C	0.036576008184841	0.212483978007631	0.0247071520107477	7.9716e-18	0.0483023	0.170034	0.445748
ANKRD36.csv	Acute Lymphoblastic Leukemia	rs11692435	2	98275354	A	G	0.109512025701137	0.266206019636263	0.0149893308803788	1.4527e-70	0.234446	0.251044	0.0289988
ANKRD36.csv	Acute Lymphoblastic Leukemia	rs13001139	2	98299983	A	G	0.707259069117814	-0.190668	0.00958663349710409	5.0675e-88	0.242158	-0.0270876	0.811584
ANKRD36.csv	Acute Lymphoblastic Leukemia	rs13383845	2	97557261	A	G	0.202638205118569	-0.0874098	0.0108276894831508	6.8592e-16	0.166871	-0.100189	0.442507
ANKRD36.csv	Acute Lymphoblastic Leukemia	rs146663992	2	97095772	A	G	0.0216596228868661	0.266629900122987	0.0437916598434758	1.1404e-09	0.0350232	0.259582	0.311273
ANKRD36.csv	Acute Lymphoblastic Leukemia	rs148279538	2	98635741	A	G	0.0631036207626303	-0.117349	0.0181139325164756	9.27e-11	0.0680561	0.0327827	0.864973
ANKRD36.csv	Acute Lymphoblastic Leukemia	rs182393789	2	98166800	A	C	0.0251596424010217	1.06848200701081	0.0721606001898297	1.32e-49	0.0143982	0.512851	0.212691
ANKRD36.csv	Acute Lymphoblastic Leukemia	rs2100057	2	98440141	C	T	0.0144136579904842	-0.255066	0.0443863105330304	9.1056e-09	0.0126921	-0.0407905	0.927402
ANKRD36.csv	Acute Lymphoblastic Leukemia	rs3926004	2	97870317	A	G	0.775484945317071	-0.0850248	0.0114239132448651	9.8573e-14	0.152514	-0.14673	0.28045
ANKRD36.csv	Acute Lymphoblastic Leukemia	rs4619651	2	97416153	A	G	0.65914238260607	0.0629341367997381	0.00920264623389505	7.9971e-12	0.438722	0.0819385	0.404203
ANKRD36.csv	Acute Lymphoblastic Leukemia	rs55757705	2	98317446	G	A	0.0232741900725523	0.269963257078805	0.0397489961392296	1.109e-11	0.0345115	0.420405	0.111754
ANKRD36.csv	Acute Lymphoblastic Leukemia	rs62154922	2	98779834	T	C	0.110540622168529	-0.144072	0.0235338156132341	9.2408e-10	0.11471	-0.379561	0.0132825
ANKRD36.csv	Acute Lymphoblastic Leukemia	rs72815665	2	98342701	C	T	0.0261851455271099	-0.195965	0.0310548372978184	2.7832e-10	0.0178447	0.300475	0.410284
ANKRD36.csv	Acute Lymphoblastic Leukemia	rs7370560	2	98790354	T	C	0.589593084704817	0.095160385556885	0.014998169454811	2.2271e-10	0.528425	0.1323	0.17521
ANKRD36.csv	Acute Lymphoblastic Leukemia	rs7590131	2	98698587	G	T	0.495149845247981	-0.0634481	0.00872414250630234	3.5211e-13	0.442615	-0.0314597	0.74789
ANKRD36.csv	Acute Lymphoblastic Leukemia	rs7597743	2	97608837	G	T	0.760842992623814	-0.089515	0.010810863245829	1.2297e-16	0.273843	-0.166665	0.127599
ANKRD9.csv	Acute Lymphoblastic Leukemia	rs113174058	14	102831731	G	A	0.0148953055369025	0.246406320122104	0.0400517408605221	7.6415e-10	0.02606	0.422624	0.160308
ANKRD9.csv	Acute Lymphoblastic Leukemia	rs117706929	14	102895699	A	G	0.0196078431372549	-0.341889	0.0315821260532785	2.6037e-27	0.0166587	-0.454644	0.218935
ANKRD9.csv	Acute Lymphoblastic Leukemia	rs1190619	14	102533101	G	A	0.222801888913875	-0.105488	0.0103230280617	1.6335e-24	0.276075	-0.0102144	0.925386
ANKRD9.csv	Acute Lymphoblastic Leukemia	rs12896205	14	102993233	A	G	0.0350062214848611	-0.274092	0.0226031196660705	7.6541e-34	0.0448002	-0.313635	0.187886
ANKRD9.csv	Acute Lymphoblastic Leukemia	rs138364504	14	102854805	T	C	0.033989676926018	0.282348676689512	0.0221578544951197	3.4278e-37	0.0386687	-0.353967	0.169263
ANKRD9.csv	Acute Lymphoblastic Leukemia	rs139626272	14	102744284	G	T	0.0153692855848783	-0.292388	0.0392745971603633	9.7091e-14	0.0162095	-0.580796	0.12398
ANKRD9.csv	Acute Lymphoblastic Leukemia	rs141050487	14	102809133	A	G	0.198051626940955	0.19511190096873	0.0112029616830823	6.2389e-68	0.262956	0.258272	0.0104095
ANKRD9.csv	Acute Lymphoblastic Leukemia	rs1678025	14	102351858	G	A	0.342474439248633	-0.0630718	0.00858949095211715	2.0886e-13	0.371291	0.0511349	0.613609
ANKRD9.csv	Acute Lymphoblastic Leukemia	rs1746591	14	102317851	A	G	0.235297448286275	0.0688644072068999	0.0102833346583989	2.1332e-11	0.197547	-0.149223	0.218869
ANKRD9.csv	Acute Lymphoblastic Leukemia	rs17540790	14	102453625	T	C	0.0183880838288782	-0.199846	0.0353383691626294	1.5548e-08	0.00806724	0.263854	0.628148
ANKRD9.csv	Acute Lymphoblastic Leukemia	rs35042679	14	102997989	A	G	0.17802753582467	0.111662988117488	0.012280644493048	9.6877e-20	0.19294	0.0159791	0.89762
ANKRD9.csv	Acute Lymphoblastic Leukemia	rs45605932	14	102901023	A	G	0.0844161020326823	-0.13794	0.0146966251825061	6.2441e-21	0.076153	-0.0527433	0.776966
ANKRD9.csv	Acute Lymphoblastic Leukemia	rs4906203	14	102928991	T	C	0.233557576668671	-0.363273	0.00942121214014978	1e-200	0.272715	-0.117004	0.283913
ANKRD9.csv	Acute Lymphoblastic Leukemia	rs4906229	14	103057511	A	C	0.243690761676373	-0.0886205	0.00933495558434113	2.2362e-21	0.258401	-0.117237	0.289348
ANKRD9.csv	Acute Lymphoblastic Leukemia	rs56002716	14	103701335	T	G	0.104477971657187	0.0790599964224269	0.0144462507395667	4.4348e-08	0.13436	0.183793	0.205952
ANKRD9.csv	Acute Lymphoblastic Leukemia	rs62007926	14	103128295	G	A	0.0168217406104618	-0.245745	0.036493112719451	1.6483e-11	0.0197578	0.539284	0.120476
ANKRD9.csv	Acute Lymphoblastic Leukemia	rs72635190	14	102793957	T	C	0.9241390255515	-0.196722	0.0154019792631622	2.3323e-37	0.0817449	-0.25823	0.15011
ANKRD9.csv	Acute Lymphoblastic Leukemia	rs76359962	14	102014181	T	C	0.0587583148558758	-0.0931093	0.0170720574439852	4.9249e-08	0.0669839	-0.126166	0.518071
ANKRD9.csv	Acute Lymphoblastic Leukemia	rs77271827	14	103008034	A	G	0.107892083913398	0.126909942988875	0.0142194421338556	4.457e-19	0.134763	0.183548	0.204264
ANKRD9.csv	Acute Lymphoblastic Leukemia	rs8012434	14	102344254	T	C	0.0554130871479249	-0.169802	0.0183859958036685	2.5732e-20	0.0911194	-0.308276	0.0700052
ANKZF1.csv	Acute Lymphoblastic Leukemia	rs114325960	2	220154746	T	C	0.955907674647425	0.306118408026199	0.0220532103844995	8.2814e-44	0.031469	-0.356688	0.196436
ANKZF1.csv	Acute Lymphoblastic Leukemia	rs114525017	2	220419887	A	G	0.0179982882746816	0.247209586213074	0.0377390407164452	5.7383e-11	0.028209	-0.339438	0.25592
ANKZF1.csv	Acute Lymphoblastic Leukemia	rs78270228	2	220244167	C	T	0.0320463154269972	0.163949048939998	0.0263405817518714	4.8464e-10	0.0281432	-0.48793	0.104073
ANKZF1.csv	Acute Lymphoblastic Leukemia	rs78862042	2	220044275	C	A	0.0501619642270316	0.123848740159048	0.0221959102761835	2.408e-08	0.0421602	-0.470659	0.0507598
ANO9.csv	Acute Lymphoblastic Leukemia	rs10736899	11	579256	A	C	0.0718066223455754	-0.20847	0.0222304182754958	6.7364e-21	0.0866426	0.0564081	0.7435
ANO9.csv	Acute Lymphoblastic Leukemia	rs111715314	11	409766	A	C	0.0466142880285113	0.361716462675802	0.0304526404003874	1.5438e-32	0.0297776	0.346836	0.229371
ANO9.csv	Acute Lymphoblastic Leukemia	rs11246115	11	353440	A	G	0.0442142065319348	-0.161668	0.0226390844459537	9.252e-13	0.0695436	-0.0628592	0.742754
ANO9.csv	Acute Lymphoblastic Leukemia	rs11246135	11	370831	C	T	0.397351447783724	-0.0819414	0.0120583621673798	1.0786e-11	0.371458	0.120236	0.229838
ANO9.csv	Acute Lymphoblastic Leukemia	rs11246273	11	704864	A	G	0.472834067547724	-0.10599	0.0101590596128113	1.749e-25	0.525564	-0.0170546	0.861576
ANO9.csv	Acute Lymphoblastic Leukemia	rs117262763	11	464972	A	G	0.0222188052587068	0.45767285526936	0.042414818289346	3.8296e-27	0.0145003	0.245879	0.532512
ANO9.csv	Acute Lymphoblastic Leukemia	rs12275194	11	451872	T	A	0.131765978266468	0.1465138403376	0.0151252583787667	3.4378e-22	0.138479	0.253103	0.0743396
ANO9.csv	Acute Lymphoblastic Leukemia	rs12285459	11	727310	C	T	0.188588356517259	0.0781677648782403	0.0130805008246859	2.2896e-09	0.188174	-0.190904	0.123566
ANO9.csv	Acute Lymphoblastic Leukemia	rs12421158	11	609888	C	T	0.742206804789964	0.110963121152873	0.0112273351160921	4.9235e-23	0.20489	0.220157	0.067627
ANO9.csv	Acute Lymphoblastic Leukemia	rs150657453	11	585768	T	C	0.0235733608141183	0.395936600581292	0.0528980481477765	7.1656e-14	0.0231	0.301997	0.360267
ANO9.csv	Acute Lymphoblastic Leukemia	rs17585	11	499120	A	G	0.123877391643889	-0.119774	0.0174942368276467	7.5626e-12	0.121186	-0.0334852	0.822596
ANO9.csv	Acute Lymphoblastic Leukemia	rs190823755	11	447890	A	G	0.0216002044989775	-0.395878	0.0549899687949622	6.0567e-13	0.0345444	0.00336499	0.990193
ANO9.csv	Acute Lymphoblastic Leukemia	rs35800583	11	500096	A	G	0.0794522131052814	0.276747464384059	0.0200573616362071	2.6275e-43	0.070399	0.281957	0.135892
ANO9.csv	Acute Lymphoblastic Leukemia	rs3758653	11	636399	C	T	0.834124708833542	-0.0789965	0.0128468385939148	7.7875e-10	0.222369	-0.136554	0.244737
ANO9.csv	Acute Lymphoblastic Leukemia	rs3993797	11	511580	T	C	0.0307960488088321	-0.198972	0.0329921489733133	1.6295e-09	0.0180344	0.118058	0.740856
ANO9.csv	Acute Lymphoblastic Leukemia	rs4963124	11	762791	G	C	0.723790878508796	-0.0773261	0.0118469236948704	6.7011e-11	0.262388	0.0608733	0.582202
ANO9.csv	Acute Lymphoblastic Leukemia	rs59653473	11	499412	T	G	0.0224092284417549	-0.367869	0.0469322320879482	4.5632e-15	0.00640199	0.0696066	0.908803
ANO9.csv	Acute Lymphoblastic Leukemia	rs61876716	11	715940	A	G	0.126817576564581	0.130863910251048	0.0156387994898419	5.8704e-17	0.141466	0.20798	0.135324
ANO9.csv	Acute Lymphoblastic Leukemia	rs61879161	11	622872	A	G	0.0233449774218284	0.309990138293618	0.0436249455787691	1.198e-12	0.0324948	0.0403011	0.880623
ANO9.csv	Acute Lymphoblastic Leukemia	rs67542097	11	364795	A	G	0.465737240075614	-0.0937619	0.0117952829196163	1.8772e-15	0.533348	0.0830472	0.399748
ANO9.csv	Acute Lymphoblastic Leukemia	rs7481614	11	438662	A	G	0.301937046004843	0.342699691405159	0.0114302955271102	1.7051e-197	0.325428	0.132219	0.201898
ANO9.csv	Acute Lymphoblastic Leukemia	rs7482311	11	372456	T	C	0.123188405797101	0.0964205600294168	0.016005006312565	1.6995e-09	0.120178	0.135217	0.372498
ANO9.csv	Acute Lymphoblastic Leukemia	rs78241130	11	545564	A	G	0.122527763088313	0.105580805279036	0.0158135585895569	2.4455e-11	0.129441	-0.0468209	0.745509
ANO9.csv	Acute Lymphoblastic Leukemia	rs8858	11	400109	A	G	0.241871806781235	0.108112312279317	0.0126980317683979	1.6803e-17	0.29593	-0.0573989	0.5924
ANO9.csv	Acute Lymphoblastic Leukemia	rs936462	11	636690	G	A	0.0861264120997106	0.148221491001197	0.0247171762804871	2.0149e-09	0.100652	0.170244	0.305097
ANXA3.csv	Acute Lymphoblastic Leukemia	rs10018189	4	79750698	A	G	0.702686132505652	0.0898570819391849	0.00886942996705046	4.0251e-24	0.253879	-0.100981	0.36709
ANXA3.csv	Acute Lymphoblastic Leukemia	rs111790966	4	79419497	T	C	0.154152011010858	-0.127707	0.0112161165845924	4.9102e-30	0.18145	-0.188279	0.132771
ANXA3.csv	Acute Lymphoblastic Leukemia	rs113677459	4	79103004	A	G	0.0793875242404654	0.149519984781864	0.015338686771701	1.8851e-22	0.0611774	0.442293	0.0268708
ANXA3.csv	Acute Lymphoblastic Leukemia	rs114373632	4	79105514	T	C	0.018055048106199	0.527641737229029	0.0368683741906179	1.8574e-46	0.0162984	0.738825	0.0576899
ANXA3.csv	Acute Lymphoblastic Leukemia	rs12505294	4	79903631	C	G	0.246535774966962	0.0578283669863897	0.00934675399812343	6.1398e-10	0.222583	-0.015623	0.894108
ANXA3.csv	Acute Lymphoblastic Leukemia	rs13152613	4	79882299	A	G	0.83264287731852	0.108150211552183	0.0118463657581203	6.9007e-20	0.135777	0.172216	0.23403
ANXA3.csv	Acute Lymphoblastic Leukemia	rs143127353	4	79047205	T	C	0.0285923123226417	0.144117880570723	0.0255464743806011	1.6867e-08	0.0294217	0.0338572	0.906171
ANXA3.csv	Acute Lymphoblastic Leukemia	rs143360728	4	80426943	C	T	0.0204957300562383	0.166189106280778	0.0296496237856199	2.0825e-08	0.0149553	0.0881822	0.825051
ANXA3.csv	Acute Lymphoblastic Leukemia	rs17003290	4	79421677	T	C	0.0847377312621039	0.125002360735439	0.015015118225059	8.4329e-17	0.178889	0.31699	0.0129772
ANXA3.csv	Acute Lymphoblastic Leukemia	rs191988303	4	79900512	T	G	0.0192549338458127	0.21908593408484	0.0377253046259668	6.3526e-09	0.0517773	-0.0923306	0.673693
ANXA3.csv	Acute Lymphoblastic Leukemia	rs4558894	4	79096713	G	C	0.466656387325572	-0.0501627	0.00814687369080952	7.3949e-10	0.435425	0.0555607	0.575227
ANXA3.csv	Acute Lymphoblastic Leukemia	rs6854010	4	79521428	A	G	0.0515331651199589	0.682423418867989	0.0192141020268715	1e-200	0.0462211	0.454649	0.0506897
ANXA3.csv	Acute Lymphoblastic Leukemia	rs76766482	4	79576511	G	A	0.0511003453074267	0.1495848105722	0.0208460234642196	7.1991e-13	0.0189163	-0.0206154	0.953952
ANXA3.csv	Acute Lymphoblastic Leukemia	rs7686951	4	79514928	G	C	0.110186585980837	0.196566565318399	0.0237499625830241	1.2696e-16	0.0705679	-0.0301718	0.874168
ANXA3.csv	Acute Lymphoblastic Leukemia	rs77845798	4	79456668	C	T	0.19183149630077	-0.103076	0.0102299110882921	7.054e-24	0.163889	0.0341363	0.79457
ANXA3.csv	Acute Lymphoblastic Leukemia	rs78693599	4	79559556	C	T	0.0221228141520943	-0.178946	0.0282718059721794	2.458e-10	0.023242	0.0232769	0.943068
ANXA3.csv	Acute Lymphoblastic Leukemia	rs79785111	4	79068735	A	G	0.0191833543809008	0.30976665791956	0.0349912069673162	8.5504e-19	0.0303776	-0.291684	0.316863
ANXA3.csv	Acute Lymphoblastic Leukemia	rs9760192	4	79468715	G	C	0.649367088607595	0.289341127593642	0.00849973348746935	1e-200	0.339179	0.115267	0.260252
ANXA5.csv	Acute Lymphoblastic Leukemia	rs10001080	4	122968874	T	C	0.123512585812357	0.0748499355311427	0.0121483997745837	7.2196e-10	0.102692	0.0679343	0.671857
ANXA5.csv	Acute Lymphoblastic Leukemia	rs10008313	4	122600023	C	T	0.0195208518189885	0.431830350447172	0.0301479611027299	1.5584e-46	0.00729607	-0.378419	0.504061
ANXA5.csv	Acute Lymphoblastic Leukemia	rs10008994	4	122457799	C	T	0.121936834094368	-0.0918862	0.0122039736843144	5.0974e-14	0.117036	-0.0604524	0.687467
ANXA5.csv	Acute Lymphoblastic Leukemia	rs10434038	4	122570298	C	T	0.123999398699688	0.454629299628524	0.0120532179070887	1e-200	0.077554	0.0185698	0.91878
ANXA5.csv	Acute Lymphoblastic Leukemia	rs112038313	4	122558419	G	A	0.0263867714319221	-0.401923	0.0251965394493767	2.7769e-57	0.0185531	-0.535384	0.128989
ANXA5.csv	Acute Lymphoblastic Leukemia	rs114217082	4	122236782	A	G	0.050253229162577	0.155846370475223	0.0185191874985412	3.9156e-17	0.0727382	0.0920321	0.623972
ANXA5.csv	Acute Lymphoblastic Leukemia	rs114235164	4	123285710	A	G	0.0431269046582499	0.192797443484705	0.0227301866876567	2.2174e-17	0.0886143	0.301157	0.0816488
ANXA5.csv	Acute Lymphoblastic Leukemia	rs114632117	4	122652584	A	G	0.0340630472854641	-0.460805	0.0233318968110664	8.0218e-87	0.0213208	-0.0786906	0.823071
ANXA5.csv	Acute Lymphoblastic Leukemia	rs115146351	4	122578939	A	G	0.0493669345020696	0.11508688171682	0.0189346805279315	1.2169e-09	0.0277488	0.176626	0.555115
ANXA5.csv	Acute Lymphoblastic Leukemia	rs115706117	4	121614793	G	T	0.0367012604874945	-0.138014	0.021631570224823	1.7686e-10	0.0486074	0.180184	0.429692
ANXA5.csv	Acute Lymphoblastic Leukemia	rs116391561	4	122733731	T	C	0.0888015717092338	0.166059859711891	0.0148608735859867	5.454e-29	0.101671	0.380412	0.0185264
ANXA5.csv	Acute Lymphoblastic Leukemia	rs11733882	4	122759991	A	G	0.369243545221199	-0.131265	0.00824671601165335	4.7991e-57	0.427138	0.0293253	0.766516
ANXA5.csv	Acute Lymphoblastic Leukemia	rs11942224	4	122604496	C	T	0.0549419049075065	-0.512007	0.0175572030139183	5.817e-187	0.0249595	0.381145	0.218191
ANXA5.csv	Acute Lymphoblastic Leukemia	rs12511689	4	122561562	A	C	0.0472559824866007	0.321474374311564	0.0187559072288382	7.4908e-66	0.0313187	-0.0438541	0.874864
ANXA5.csv	Acute Lymphoblastic Leukemia	rs13119653	4	122500032	T	G	0.0470692717584369	-0.148203	0.0207436614716544	9.0258e-13	0.0614756	-0.0295188	0.885642
ANXA5.csv	Acute Lymphoblastic Leukemia	rs13124630	4	122423129	C	A	0.336671125549398	0.0615150532235009	0.00846568496415019	3.6919e-13	0.391083	0.236356	0.0176991
ANXA5.csv	Acute Lymphoblastic Leukemia	rs13124997	4	122483240	G	A	0.310768475881332	-0.082456	0.00859911078566305	8.8943e-22	0.270499	-0.26386	0.0160783
ANXA5.csv	Acute Lymphoblastic Leukemia	rs13130711	4	122906668	G	A	0.268533897025517	-0.0591183	0.00897990386252089	4.5981e-11	0.25197	-0.0716094	0.520404
ANXA5.csv	Acute Lymphoblastic Leukemia	rs13136171	4	122569357	A	T	0.316878360476895	-0.543355	0.00866823534615675	1e-200	0.297677	-0.0527561	0.61946
ANXA5.csv	Acute Lymphoblastic Leukemia	rs1396082	4	122872719	G	A	0.534243648512159	0.0582455431212593	0.00807496681333397	5.4732e-13	0.376881	0.117441	0.242156
ANXA5.csv	Acute Lymphoblastic Leukemia	rs139865967	4	122728276	T	C	0.0190873927910757	-0.210652	0.0341386296509573	6.8031e-10	0.0233973	-0.283907	0.383894
ANXA5.csv	Acute Lymphoblastic Leukemia	rs140450166	4	122339720	T	C	0.0165651953323186	0.368421879662454	0.0351900166829795	1.194e-25	0.0138566	-0.0360312	0.933759
ANXA5.csv	Acute Lymphoblastic Leukemia	rs143778313	4	122524201	A	C	0.0130130597014925	-0.326772	0.0496454867197411	4.6354e-11	0.00160057	0.653903	0.60649
ANXA5.csv	Acute Lymphoblastic Leukemia	rs147549847	4	122585796	C	T	0.0229645593869732	-0.48979	0.0293015279972016	1.009e-62	0.0127548	-0.884672	0.0419749
ANXA5.csv	Acute Lymphoblastic Leukemia	rs150203024	4	122365666	T	C	0.0183918168269882	-0.241632	0.0373650531129296	1.001e-10	0.00761743	-0.526643	0.396664
ANXA5.csv	Acute Lymphoblastic Leukemia	rs151171352	4	122288378	T	C	0.0160927301372946	-0.229316	0.0340166299300024	1.5687e-11	0.00657725	-0.228673	0.713927
ANXA5.csv	Acute Lymphoblastic Leukemia	rs186515942	4	122679406	T	C	0.0219494873274446	-0.206102	0.0290473260635111	1.2879e-12	0.0356328	-0.353126	0.185964
ANXA5.csv	Acute Lymphoblastic Leukemia	rs2390135	4	122237056	G	T	0.807076553045962	-0.0842003	0.0100673490890166	6.073e-17	0.147886	-0.0309264	0.824701
ANXA5.csv	Acute Lymphoblastic Leukemia	rs2706785	4	122660250	G	A	0.0413090128755365	0.251231350206103	0.0201255567647801	9.2437e-36	0.0603125	0.0634441	0.757199
ANXA5.csv	Acute Lymphoblastic Leukemia	rs4262006	4	122378888	C	T	0.161016949152542	-0.113477	0.0108081810092235	8.7115e-26	0.145913	-0.195752	0.160494
ANXA5.csv	Acute Lymphoblastic Leukemia	rs4320156	4	122251303	A	C	0.0224837105624143	0.163440201576828	0.0283013336063771	7.7045e-09	0.0199091	-0.332759	0.332965
ANXA5.csv	Acute Lymphoblastic Leukemia	rs4343749	4	122485885	T	A	0.319569549621363	0.192858488651797	0.00873089512756448	4.0322e-108	0.377042	0.0624564	0.533105
ANXA5.csv	Acute Lymphoblastic Leukemia	rs45549234	4	122933840	C	T	0.0392196461749737	0.17155715985893	0.0210898089468357	4.1398e-16	0.0243623	-0.119979	0.704523
ANXA5.csv	Acute Lymphoblastic Leukemia	rs4833221	4	122454625	A	G	0.37975761799667	0.0773715626331209	0.00828815265158978	1.008e-20	0.354424	0.0121922	0.905774
ANXA5.csv	Acute Lymphoblastic Leukemia	rs4833753	4	122550874	A	G	0.531079709872599	-0.257278	0.00796041359413123	1e-200	0.465083	-0.0751188	0.440712
ANXA5.csv	Acute Lymphoblastic Leukemia	rs4833765	4	122657875	G	A	0.304861169364986	0.101241233192274	0.00903278253352672	3.7167e-29	0.303205	-0.0252523	0.811938
ANXA5.csv	Acute Lymphoblastic Leukemia	rs4833782	4	122892159	C	T	0.554519039608503	-0.113413	0.00805043322697187	4.5013e-45	0.433557	-0.169864	0.0824328
ANXA5.csv	Acute Lymphoblastic Leukemia	rs4833809	4	122999081	A	G	0.38151614236855	-0.0467875	0.00817820633862372	1.0577e-08	0.404031	-0.162132	0.102451
ANXA5.csv	Acute Lymphoblastic Leukemia	rs5020376	4	122559918	T	C	0.325698072080875	0.124214293603834	0.00847676620628752	1.2814e-48	0.46453	-0.0325097	0.739513
ANXA5.csv	Acute Lymphoblastic Leukemia	rs57634077	4	122143346	A	T	0.0280233169286636	0.15361470253859	0.0265691237073163	7.3993e-09	0.0391548	0.183834	0.459991
ANXA5.csv	Acute Lymphoblastic Leukemia	rs62319047	4	122305826	G	A	0.115634800789871	-0.0722803	0.0125785797521359	9.1164e-09	0.151878	-0.224817	0.0963452
ANXA5.csv	Acute Lymphoblastic Leukemia	rs6534310	4	122613920	G	A	0.030046674445741	-0.824886	0.0250424688961167	1e-200	0.00651900000000005	0.0159593	0.978345
ANXA5.csv	Acute Lymphoblastic Leukemia	rs6827473	4	122295849	T	G	0.0308883706604479	-0.20905	0.0245110874826413	1.4762e-17	0.032082	-0.0907786	0.748176
ANXA5.csv	Acute Lymphoblastic Leukemia	rs6829704	4	122457635	T	G	0.384710914861322	0.0710207277907236	0.00887526121777079	1.2241e-15	0.441108	0.050792	0.602855
ANXA5.csv	Acute Lymphoblastic Leukemia	rs6852589	4	122457437	A	G	0.12574200913242	-0.0769914	0.0120440235683371	1.6309e-10	0.146569	-0.0488238	0.724548
ANXA5.csv	Acute Lymphoblastic Leukemia	rs71602334	4	122291698	A	G	0.0550108027256108	0.118409938082709	0.0181668847455022	7.1346e-11	0.0400119	-0.389568	0.117002
ANXA5.csv	Acute Lymphoblastic Leukemia	rs72676832	4	122532446	C	T	0.0558611656843484	-0.117926	0.0184072206939405	1.488e-10	0.0935979	0.203803	0.224517
ANXA5.csv	Acute Lymphoblastic Leukemia	rs72680748	4	122726029	G	A	0.0531507832117661	0.106979269858635	0.0181486903027577	3.7559e-09	0.0333949	-0.047274	0.860182
ANXA5.csv	Acute Lymphoblastic Leukemia	rs72682611	4	122870537	T	C	0.0175708722036047	-0.264332	0.0326585449000218	5.7737e-16	0.0180324	0.385471	0.301532
ANXA5.csv	Acute Lymphoblastic Leukemia	rs72911871	4	122621147	G	A	0.0505327245053272	0.807966277522245	0.0182307796583447	1e-200	0.0360627	0.0705146	0.789396
ANXA5.csv	Acute Lymphoblastic Leukemia	rs74624126	4	122647119	T	C	0.0372189478279852	-0.377612	0.022331368288462	3.8229e-64	0.0631861	-0.33236	0.0993413
ANXA5.csv	Acute Lymphoblastic Leukemia	rs74898873	4	122989645	T	C	0.0329590514702996	0.144132522738334	0.0226619900219075	2.0175e-10	0.0239516	0.0589	0.852312
[truncated: 151,422 more rows]
